# Supplementary material for: Direct reprogramming of human astrocytes into neural stem cells and neurons
Source: PubMed Central journal article supplement — Exp Cell Res. 2012 Aug 1;318(13-16):1528–41. doi: 10.1016/j.yexcr.2012.02.040 (PMC3405531; doi:10.1016/j.yexcr.2012.02.040), 2012-08-01
Supplement: mmc2.pdf [file mmc2.pdf]

| up_gene-pos | up_gene_symb<br>ol | up_gene_strand | down_gene-pos | down_gene_sy<br>mbol | down_gene_str<br>and | chrom | window-start |
|-------------|--------------------|----------------|---------------|----------------------|----------------------|-------|--------------|
| -963        | SCRIB              | 0              | 34            | PUF60                | 0                    | chr8  | 144970500    |
| 460         | PUF60              | 0              | 12184         | PUF60                | 0                    | chr8  | 144971000    |
| 960         | PUF60              | 0              | 11684         | PUF60                | 0                    | chr8  | 144971500    |
| 5701        | DIDO1              | 0              | 27219         | DIDO1                | 0                    | chr20 | 61012500     |
| 6201        | DIDO1              | 0              | 26719         | DIDO1                | 0                    | chr20 | 61013000     |
| 25156       | HIP1               | 0              | 179715        | HIP1                 | 0                    | chr7  | 75026500     |
| 25656       | HIP1               | 0              | 179215        | HIP1                 | 0                    | chr7  | 75027000     |
| 61779       | MAPK8IP3           | 0              | 2319          | MAPK8IP3             | 0                    | chr16 | 1758000      |
| 62279       | MAPK8IP3           | 0              | 1819          | MAPK8IP3             | 0                    | chr16 | 1758500      |
| 5401        | DUPD1              | 0              | 15278         | DUPD1                | 0                    | chr10 | 76473000     |
| 336397      | PRDM16             | 0              | 33045         | PRDM16               | 0                    | chr1  | 3312000      |
| -5683       | ---                | 0              | 14851         | SCNN1D               | 0                    | chr1  | 1192500      |
| 2927        | MGC16121           | 0              | 326           | MGC16121             | 0                    | chrX  | 133508000    |
| 33712       | CTDP1              | 0              | 40995         | CTDP1                | 0                    | chr18 | 75574500     |
| 34212       | CTDP1              | 0              | 40495         | CTDP1                | 0                    | chr18 | 75575000     |
| 63522       | ELOVL2             | 0              | 110           | ELOVL2               | 0                    | chr6  | 11152500     |
| 23124       | CYS1               | 0              | 489           | CYS1                 | 0                    | chr2  | 10137500     |
| 11794       | UNKL               | 0              | 4682          | UNKL                 | 0                    | chr16 | 1365000      |
| 12294       | UNKL               | 0              | 4182          | UNKL                 | 0                    | chr16 | 1365500      |
| 20531       | SLC6A18            | 0              | 304           | SLC6A18              | 0                    | chr5  | 1299000      |
| -482        | WDR59              | 0              | 13415         | ZNRF1                | 0                    | chr16 | 73577000     |
| -6544       | SPO11              | 0              | 551           | RAE1                 | 0                    | chr20 | 55359000     |
| -13349      | PSEN1              | 0              | 457           | PAPLN                | 0                    | chr14 | 72773500     |
| 43          | PAPLN              | 0              | 37100         | PAPLN                | 0                    | chr14 | 72774000     |
| 3785        | MAGEA1             | 0              | 810           | MAGEA1               | 0                    | chrX  | 152138500    |
| 79          | LIME1              | 0              | 2404          | LIME1                | 0                    | chr20 | 61838500     |
| -397512     | KIF26A             | 0              | 2600          | C14orf180            | 0                    | chr14 | 104114500    |
| -246354     | SHOX               | 0              | 488386        | CRLF2                | 0                    | chrY  | 786500       |
| -30241      | TAPT1              | 0              | 244761        | LDB2                 | 0                    | chr4  | 15867500     |
| 6294        | UNKL               | 0              | 10182         | UNKL                 | 0                    | chr16 | 1359500      |
| 6794        | UNKL               | 0              | 9682          | UNKL                 | 0                    | chr16 | 1360000      |
| 7294        | UNKL               | 0              | 9182          | UNKL                 | 0                    | chr16 | 1360500      |
| 9055        | SLC43A2            | 0              | 45380         | SLC43A2              | 0                    | chr17 | 1433500      |
| 686289      | FRMD4A             | 0              | 872           | FRMD4A               | 0                    | chr10 | 14412000     |
| 686789      | FRMD4A             | 0              | 372           | FRMD4A               | 0                    | chr10 | 14412500     |
| -4599       | FRMPD1             | 0              | 2301          | RG9MTD3              | 0                    | chr9  | 37741500     |
| -5099       | FRMPD1             | 0              | 1801          | RG9MTD3              | 0                    | chr9  | 37742000     |
| 39543       | FLJ44054           | 0              | 333           | FLJ44054             | 0                    | chr13 | 113527000    |
| 20460       | HEXDC              | 0              | 3805          | HEXDC                | 0                    | chr17 | 77990000     |
| 20960       | HEXDC              | 0              | 3305          | HEXDC                | 0                    | chr17 | 77990500     |
| 21460       | HEXDC              | 0              | 2805          | HEXDC                | 0                    | chr17 | 77991000     |
| 6929        | TTLL12             | 0              | 13551         | TTLL12               | 0                    | chr22 | 41899500     |
| 7429        | TTLL12             | 0              | 13051         | TTLL12               | 0                    | chr22 | 41900000     |
| 7929        | TTLL12             | 0              | 12551         | TTLL12               | 0                    | chr22 | 41900500     |
| -7525       | OVCA2              | 0              | 4142          | HIC1                 | 0                    | chr17 | 1901000      |
| -8025       | OVCA2              | 0              | 3642          | HIC1                 | 0                    | chr17 | 1901500      |
| 10791       | LHX2               | 0              | 10763         | LHX2                 | 0                    | chr9  | 125824500    |
| 11291       | LHX2               | 0              | 10263         | LHX2                 | 0                    | chr9  | 125825000    |
| 154944      | CREBBP             | 0              | 122           | CREBBP               | 0                    | chr16 | 3870000      |
| -26505      | CDC42BPB           | 0              | 16233         | C14orf73             | 0                    | chr14 | 102620000    |
| -27005      | CDC42BPB           | 0              | 15733         | C14orf73             | 0                    | chr14 | 102620500    |
| 9754        | MIB2               | 0              | 5348          | MIB2                 | 0                    | chr1  | 1550500      |
| 10254       | MIB2               | 0              | 4848          | MIB2                 | 0                    | chr1  | 1551000      |

|         |           |   |         |           |   |       |           |
|---------|-----------|---|---------|-----------|---|-------|-----------|
| -1199   | SRMS      | 0 | 4316    | C20orf195 | 0 | chr20 | 61650500  |
| 968     | PIGS      | 0 | 17514   | PIGS      | 0 | chr17 | 23905500  |
| 1468    | PIGS      | 0 | 17014   | PIGS      | 0 | chr17 | 23906000  |
| 84      | FGF3      | 0 | 9129    | FGF3      | 0 | chr11 | 69334000  |
| 584     | FGF3      | 0 | 8629    | FGF3      | 0 | chr11 | 69334500  |
| -31221  | UBB       | 0 | 1612    | TRPV2     | 0 | chr17 | 16258000  |
| -31721  | UBB       | 0 | 1112    | TRPV2     | 0 | chr17 | 16258500  |
| -972    | PSG5      | 0 | 5193    | PSG4      | 0 | chr19 | 48383500  |
| -1472   | PSG5      | 0 | 4693    | PSG4      | 0 | chr19 | 48384000  |
| -147    | ALDH1A3   | 0 | 2482    | LRRK1     | 0 | chr15 | 99274500  |
| -647    | ALDH1A3   | 0 | 1982    | LRRK1     | 0 | chr15 | 99275000  |
| 43875   | CHST3     | 0 | 5327    | CHST3     | 0 | chr10 | 73438000  |
| 15552   | SLC44A4   | 0 | 302     | SLC44A4   | 0 | chr6  | 31954500  |
| 36708   | TCF3      | 0 | 4286    | TCF3      | 0 | chr19 | 1597000   |
| 37208   | TCF3      | 0 | 3786    | TCF3      | 0 | chr19 | 1597500   |
| 1563    | CASKIN2   | 0 | 8053    | CASKIN2   | 0 | chr17 | 71009500  |
| 2063    | CASKIN2   | 0 | 7553    | CASKIN2   | 0 | chr17 | 71010000  |
| -5363   | SOLH      | 0 | 422     | C16orf11  | 0 | chr16 | 550000    |
| 78      | C16orf11  | 0 | 5030    | C16orf11  | 0 | chr16 | 550500    |
| -323954 | CDH18     | 0 | 1154345 | GUSBP1    | 0 | chr5  | 20341000  |
| -16034  | PLCB2     | 0 | 7444    | C15orf52  | 0 | chr15 | 38403500  |
| 19218   | MMP15     | 0 | 2305    | MMP15     | 0 | chr16 | 56636000  |
| 19718   | MMP15     | 0 | 1805    | MMP15     | 0 | chr16 | 56636500  |
| 17663   | RUFY1     | 0 | 32625   | RUFY1     | 0 | chr5  | 178937000 |
| 18163   | RUFY1     | 0 | 32125   | RUFY1     | 0 | chr5  | 178937500 |
| -94323  | C20orf191 | 0 | 2088539 | FRG1B     | 0 | chr20 | 26137000  |
| -94823  | C20orf191 | 0 | 2088039 | FRG1B     | 0 | chr20 | 26137500  |
| 2063    | C14orf21  | 0 | 3214    | C14orf21  | 0 | chr14 | 23841000  |
| 46270   | MTA1      | 0 | 4602    | MTA1      | 0 | chr14 | 105003500 |
| 46770   | MTA1      | 0 | 4102    | MTA1      | 0 | chr14 | 105004000 |
| 14587   | IGLON5    | 0 | 4414    | IGLON5    | 0 | chr19 | 56521500  |
| 15087   | IGLON5    | 0 | 3914    | IGLON5    | 0 | chr19 | 56522000  |
| -950597 | C20orf197 | 0 | 228953  | CDH4      | 0 | chr20 | 59032000  |
| -951097 | C20orf197 | 0 | 228453  | CDH4      | 0 | chr20 | 59032500  |
| -558650 | OR4A47    | 0 | 98262   | FOLH1     | 0 | chr11 | 49026500  |
| -559150 | OR4A47    | 0 | 97762   | FOLH1     | 0 | chr11 | 49027000  |
| -187551 | CDC42BPA  | 0 | 57866   | ZNF678    | 0 | chr1  | 225760000 |
| -188051 | CDC42BPA  | 0 | 57366   | ZNF678    | 0 | chr1  | 225760500 |
| -188551 | CDC42BPA  | 0 | 56866   | ZNF678    | 0 | chr1  | 225761000 |
| -136345 | C2orf85   | 0 | 79016   | LOC728323 | 0 | chr2  | 242600500 |
| -137345 | C2orf85   | 0 | 78016   | LOC728323 | 0 | chr2  | 242601500 |
| 2914    | MFSD10    | 0 | 1384    | MFSD10    | 0 | chr4  | 2905000   |
| 14142   | FLT4      | 0 | 27730   | FLT4      | 0 | chr5  | 179981500 |
| -301487 | ZNF479    | 0 | 824     | ZNF716    | 0 | chr7  | 57513000  |
| -13705  | LOC728190 | 0 | 1456    | FAM22D    | 0 | chr10 | 89106000  |
| 2769    | TMEM204   | 0 | 18244   | TMEM204   | 0 | chr16 | 1527000   |
| 193990  | PTPRN2    | 0 | 854743  | PTPRN2    | 0 | chr7  | 157218500 |
| 194490  | PTPRN2    | 0 | 854243  | PTPRN2    | 0 | chr7  | 157219000 |
| 6040    | KNDC1     | 0 | 59906   | KNDC1     | 0 | chr10 | 134830000 |
| 63636   | AMFR      | 0 | 445     | AMFR      | 0 | chr16 | 55016500  |
| -3696   | NLRP6     | 0 | 137     | ATHL1     | 0 | chr11 | 279000    |
| 363     | ATHL1     | 0 | 6188    | ATHL1     | 0 | chr11 | 279500    |
| 863     | ATHL1     | 0 | 5688    | ATHL1     | 0 | chr11 | 280000    |
| -78939  | GRAP      | 0 | 1506    | GRAPL     | 0 | chr17 | 18970000  |
| -285519 | IMPAD1    | 0 | 155     | C8orf71   | 0 | chr8  | 58354500  |
| 367     | NTSR1     | 0 | 53568   | NTSR1     | 0 | chr20 | 60811000  |
| -6560   | ZNF680    | 0 | 96445   | ZNF107    | 0 | chr7  | 63667500  |
| 14095   | BID       | 0 | 26258   | BID       | 0 | chr22 | 16611000  |

|         |          |   |        |              |   |       |           |
|---------|----------|---|--------|--------------|---|-------|-----------|
| 14595   | BID      | 0 | 25758  | BID          | 0 | chr22 | 16611500  |
| 18181   | PABPC1   | 0 | 991    | PABPC1       | 0 | chr8  | 101802500 |
| 18681   | PABPC1   | 0 | 491    | PABPC1       | 0 | chr8  | 101803000 |
| 2071    | KIAA0664 | 0 | 20177  | KIAA0664     | 0 | chr17 | 2541500   |
| 15287   | TPST2    | 0 | 49089  | TPST2        | 0 | chr22 | 25267000  |
| -69542  | TRIO     | 0 | 2890   | FAM105A      | 0 | chr5  | 14632000  |
| -70042  | TRIO     | 0 | 2390   | FAM105A      | 0 | chr5  | 14632500  |
| 116     | FAM100A  | 0 | 5928   | FAM100A      | 0 | chr16 | 4599000   |
| 616     | FAM100A  | 0 | 5428   | FAM100A      | 0 | chr16 | 4599500   |
| -16713  | CCT8L1   | 0 | 141    | LOC100128822 | 0 | chr7  | 151792000 |
| -1855   | C14orf34 | 0 | 319845 | PELI2        | 0 | chr14 | 55335000  |
| 79545   | FOXK1    | 0 | 9600   | FOXK1        | 0 | chr7  | 4768000   |
| 80045   | FOXK1    | 0 | 9100   | FOXK1        | 0 | chr7  | 4768500   |
| 982     | C8G      | 0 | 747    | C8G          | 0 | chr9  | 138960500 |
| -15158  | UTP6     | 0 | 20156  | SUZ12        | 0 | chr17 | 27268000  |
| 18964   | WDR43    | 0 | 34584  | WDR43        | 0 | chr2  | 28990000  |
| -380    | SNORD92  | 0 | 12936  | SNORD53      | 0 | chr2  | 28990500  |
| 509     | DNAI2    | 0 | 40117  | DNAI2        | 0 | chr17 | 69782500  |
| 1148    | SLC18A3  | 0 | 1272   | SLC18A3      | 0 | chr10 | 50489500  |
| -1248   | GSC      | 0 | 314817 | DICER1       | 0 | chr14 | 94307500  |
| -1493   | SHANK1   | 0 | 4916   | CLEC11A      | 0 | chr19 | 55913500  |
| -1993   | SHANK1   | 0 | 4416   | CLEC11A      | 0 | chr19 | 55914000  |
| -19398  | USP2     | 0 | 34365  | THY1         | 0 | chr11 | 118759500 |
| 25552   | TNRC18   | 0 | 91203  | TNRC18       | 0 | chr7  | 5338500   |
| 26052   | TNRC18   | 0 | 90703  | TNRC18       | 0 | chr7  | 5339000   |
| 46      | OCM      | 0 | 5520   | OCM          | 0 | chr7  | 5887000   |
| -1524   | GLI4     | 0 | 12933  | ZNF696       | 0 | chr8  | 144432000 |
| 20878   | EPHB4    | 0 | 4079   | EPHB4        | 0 | chr7  | 100259000 |
| 21378   | EPHB4    | 0 | 3579   | EPHB4        | 0 | chr7  | 100259500 |
| 5201    | ESPNP    | 0 | 23739  | ESPNP        | 0 | chr1  | 16895500  |
| 5701    | ESPNP    | 0 | 23239  | ESPNP        | 0 | chr1  | 16896000  |
| -35617  | ZNF624   | 0 | 863    | CCDC144A     | 0 | chr17 | 16533500  |
| -1236   | PLEKHM1P | 0 | 15949  | LRRRC37A3    | 0 | chr17 | 60265000  |
| 1848    | ADCY9    | 0 | 151687 | ADCY9        | 0 | chr16 | 3954500   |
| 706     | CARD11   | 0 | 137105 | CARD11       | 0 | chr7  | 2913000   |
| 52527   | MUC5AC   | 0 | 60302  | MUC5AC       | 0 | chr11 | 1185000   |
| 53027   | MUC5AC   | 0 | 59802  | MUC5AC       | 0 | chr11 | 1185500   |
| -4614   | TRIM64   | 0 | 14852  | TRIM53       | 0 | chr11 | 89351500  |
| 19114   | GP6      | 0 | 5444   | GP6          | 0 | chr19 | 60236000  |
| 19614   | GP6      | 0 | 4944   | GP6          | 0 | chr19 | 60236500  |
| -34635  | APOD     | 0 | 43090  | SDHAP2       | 0 | chr3  | 196827000 |
| -35135  | APOD     | 0 | 42590  | SDHAP2       | 0 | chr3  | 196827500 |
| 1819    | SSC5D    | 0 | 28777  | SSC5D        | 0 | chr19 | 60693500  |
| 2319    | SSC5D    | 0 | 28277  | SSC5D        | 0 | chr19 | 60694000  |
| 2819    | SSC5D    | 0 | 27777  | SSC5D        | 0 | chr19 | 60694500  |
| 25529   | MYBPC2   | 0 | 7895   | MYBPC2       | 0 | chr19 | 55653500  |
| 26029   | MYBPC2   | 0 | 7395   | MYBPC2       | 0 | chr19 | 55654000  |
| 11094   | C22orf41 | 0 | 694    | C22orf41     | 0 | chr22 | 49347500  |
| -14188  | WWP2     | 0 | 401    | WWP2         | 0 | chr16 | 68516000  |
| -98682  | SLC5A4   | 0 | 871    | WFPL3        | 0 | chr22 | 31080000  |
| -137671 | SC5DL    | 0 | 1170   | SORL1        | 0 | chr11 | 120827000 |
| 429     | AMPD2    | 0 | 6200   | AMPD2        | 0 | chr1  | 109970000 |
| -1213   | TMEM8C   | 0 | 6106   | ADAMTSL2     | 0 | chr9  | 135381000 |
| -1713   | TMEM8C   | 0 | 5606   | ADAMTSL2     | 0 | chr9  | 135381500 |
| -11295  | NBPF24   | 0 | 284645 | FLJ39739     | 0 | chr1  | 146088000 |
| 44482   | PTPRS    | 0 | 90814  | PTPRS        | 0 | chr19 | 5201000   |
| 44982   | PTPRS    | 0 | 90314  | PTPRS        | 0 | chr19 | 5201500   |
| 293     | C22orf15 | 0 | 2550   | C22orf15     | 0 | chr22 | 22435500  |

|         |                |   |        |           |   |       |           |
|---------|----------------|---|--------|-----------|---|-------|-----------|
| -728    | MSMP           | 0 | 37405  | NPR2      | 0 | chr9  | 35745000  |
| -1228   | MSMP           | 0 | 36905  | NPR2      | 0 | chr9  | 35745500  |
| -34859  | H19            | 0 | 96422  | IGF2      | 0 | chr11 | 2010500   |
| 5599    | SPTB           | 0 | 51119  | SPTB      | 0 | chr14 | 64308500  |
| -15072  | STAT6          | 0 | 2048   | LRP1      | 0 | chr12 | 55806500  |
| -28945  | ZNF667         | 0 | 1523   | ZNF471    | 0 | chr19 | 61709500  |
| 14865   | SSBP4          | 0 | 459    | SSBP4     | 0 | chr19 | 18406000  |
| 1376    | ISYNA1         | 0 | 1943   | ISYNA1    | 0 | chr19 | 18408000  |
| -17301  | LCN1           | 0 | 2305   | OBP2A     | 0 | chr9  | 137575500 |
| -42634  | ABR            | 0 | 49706  | TUSC5     | 0 | chr17 | 1080000   |
| 13661   | LMTK3          | 0 | 14258  | LMTK3     | 0 | chr19 | 53694000  |
| 14161   | LMTK3          | 0 | 13758  | LMTK3     | 0 | chr19 | 53694500  |
| -228887 | .RD20A3,ANKRD2 | 0 | 581063 | PGM5P2    | 0 | chr9  | 67789000  |
| -2049   | GPR172B        | 0 | 40977  | ZFP3      | 0 | chr17 | 4881500   |
| 2088    | SPDYE6         | 0 | 8609   | SPDYE6    | 0 | chr7  | 101775000 |
| 2588    | SPDYE6         | 0 | 8109   | SPDYE6    | 0 | chr7  | 101775500 |
| -52441  | PIK3R5         | 0 | 56583  | NTN1      | 0 | chr17 | 8809000   |
| -32743  | TDRD9          | 0 | 300    | ASPG      | 0 | chr14 | 103621500 |
| -49237  | TRIM53         | 0 | 34265  | UBTFL1    | 0 | chr11 | 89424500  |
| -49737  | TRIM53         | 0 | 33765  | UBTFL1    | 0 | chr11 | 89425000  |
| -1257   | PFN3           | 0 | 244    | F12       | 0 | chr5  | 176761500 |
| 9211    | CKAP4          | 0 | 843    | CKAP4     | 0 | chr12 | 105165000 |
| 9711    | CKAP4          | 0 | 343    | CKAP4     | 0 | chr12 | 105165500 |
| -2256   | ATP5J2         | 0 | 4450   | ZNF789    | 0 | chr7  | 98904000  |
| 19867   | SH3GLB2        | 0 | 400    | SH3GLB2   | 0 | chr9  | 130830000 |
| -2700   | ZBTB46         | 0 | 53009  | C20orf135 | 0 | chr20 | 61910000  |
| -444    | SCN11A         | 0 | 101010 | WDR48     | 0 | chr3  | 38967500  |
| -35321  | GRIK4          | 0 | 2512   | TBCEL     | 0 | chr11 | 120397500 |
| -35821  | GRIK4          | 0 | 2012   | TBCEL     | 0 | chr11 | 120398000 |
| 89      | PELI3          | 0 | 10384  | PELI3     | 0 | chr11 | 65991000  |
| -2023   | ACHE           | 0 | 116583 | MUC17     | 0 | chr7  | 100333500 |
| 107037  | PCNT           | 0 | 14610  | PCNT      | 0 | chr21 | 46675500  |
| 107537  | PCNT           | 0 | 14110  | PCNT      | 0 | chr21 | 46676000  |
| 174377  | KDM4B          | 0 | 10108  | KDM4B     | 0 | chr19 | 5094500   |
| 174877  | KDM4B          | 0 | 9608   | KDM4B     | 0 | chr19 | 5095000   |
| 5273    | HYMAI          | 0 | 560    | HYMAI     | 0 | chr6  | 144371000 |
| 91629   | KCTD1          | 0 | 1998   | KCTD1     | 0 | chr18 | 22380500  |
| 92129   | KCTD1          | 0 | 1498   | KCTD1     | 0 | chr18 | 22381000  |
| -14888  | ACOT2          | 0 | 1162   | ACOT4     | 0 | chr14 | 73127000  |
| 120588  | PRKAR1B        | 0 | 42159  | PRKAR1B   | 0 | chr7  | 676500    |
| 121088  | PRKAR1B        | 0 | 41659  | PRKAR1B   | 0 | chr7  | 677000    |
| 8346    | OPLAH          | 0 | 1072   | OPLAH     | 0 | chr8  | 145186500 |
| -7575   | OR2C1          | 0 | 17585  | ZNF434    | 0 | chr16 | 3354500   |
| -8075   | OR2C1          | 0 | 17085  | ZNF434    | 0 | chr16 | 3355000   |
| 10525   | NTN5           | 0 | 1076   | NTN5      | 0 | chr19 | 53867000  |
| -25485  | NOMO1          | 0 | 15800  | NPPI      | 0 | chr16 | 14923000  |
| 19176   | SLBP           | 0 | 328    | SLBP      | 0 | chr4  | 1683500   |
| -667    | KPTN           | 0 | 2702   | NAPA      | 0 | chr19 | 52680000  |
| 12003   | KRT79          | 0 | 844    | KRT79     | 0 | chr12 | 51513500  |
| 12503   | KRT79          | 0 | 344    | KRT79     | 0 | chr12 | 51514000  |
| -156    | KRT79          | 0 | 4512   | KRT78     | 0 | chr12 | 51514500  |
| -2395   | ADRBK1         | 0 | 394    | ANKRD13D  | 0 | chr11 | 66813000  |
| 8373    | TUBGCP2        | 0 | 21134  | TUBGCP2   | 0 | chr10 | 134951500 |
| 8873    | TUBGCP2        | 0 | 20634  | TUBGCP2   | 0 | chr10 | 134952000 |
| -340170 | MYEOV          | 0 | 3553   | CCND1     | 0 | chr11 | 69161500  |
| 12465   | ANKRD11        | 0 | 210470 | ANKRD11   | 0 | chr16 | 87874000  |
| -424    | RPH3AL         | 0 | 57433  | C17orf97  | 0 | chr17 | 203000    |
| -1018   | GUCA2A         | 0 | 10796  | FOXJ3     | 0 | chr1  | 42404000  |

|          |           |     |          |              |   |       |           |
|----------|-----------|-----|----------|--------------|---|-------|-----------|
| -5217    | SPACA4    | 0   | 2399     | RPL18        | 0 | chr19 | 53808000  |
| -5717    | SPACA4    | 0   | 1899     | RPL18        | 0 | chr19 | 53808500  |
| -22696   | ST3GAL5   | 0   | 129850   | LOC90784     | 0 | chr2  | 85971000  |
| -95608   | ALOX12P2  | 0   | 107      | ALOX12       | 0 | chr17 | 6840000   |
| 39688    | KIF26A    | 0   | 2488     | KIF26A       | 0 | chr14 | 103714500 |
| 40188    | KIF26A    | 0   | 1988     | KIF26A       | 0 | chr14 | 103715000 |
| -87474   | GALNT9    | 0   | 18049    | LOC100130238 | 0 | chr12 | 131344000 |
| -87974   | GALNT9    | 0   | 17549    | LOC100130238 | 0 | chr12 | 131344500 |
| 47087    | PLEKHM2   | 0   | 3349     | PLEKHM2      | 0 | chr1  | 15930500  |
| 47587    | PLEKHM2   | 0   | 2849     | PLEKHM2      | 0 | chr1  | 15931000  |
| 5626     | SCARF2    | 0   | 7646     | SCARF2       | 0 | chr22 | 19114500  |
| -12600   | DTYMK     | 0   | 2628     | ING5         | 0 | chr2  | 242287500 |
| -13100   | DTYMK     | 0   | 2128     | ING5         | 0 | chr2  | 242288000 |
| -9697    | ARID3A    | 0   | 1827     | WDR18        | 0 | chr19 | 933500    |
| -19980   | IGF2BP3   | 0   | 31       | RPS2P32      | 0 | chr7  | 23496500  |
| 2800     | FAM109B   | 0   | 2388     | FAM109B      | 0 | chr22 | 40803000  |
| -7737    | ZC3H3     | 0   | 9134     | GSDMD        | 0 | chr8  | 144702500 |
| -8237    | ZC3H3     | 0   | 8634     | GSDMD        | 0 | chr8  | 144703000 |
| -1616    | LEMD2     | 0   | 3926     | MLN          | 0 | chr6  | 33866500  |
| -240904  | SMOC2     | 0   | 306299   | THBS2        | 0 | chr6  | 169051500 |
| -2214    | BMS1P4    | 0   | 11637    | SEC24C       | 0 | chr10 | 75162500  |
| -264721  | CECR1     | 0   | 1127     | CECR2        | 0 | chr22 | 16335500  |
| -265221  | CECR1     | 0   | 627      | CECR2        | 0 | chr22 | 16336000  |
| -265721  | CECR1     | 0   | 127      | CECR2        | 0 | chr22 | 16336500  |
| -123376  | ZNF99     | 0   | 464337   | ZNF91        | 0 | chr19 | 22868000  |
| -123876  | ZNF99     | 0   | 463837   | ZNF91        | 0 | chr19 | 22868500  |
| -347     | LOC729176 | 0   | 400200   | STXBP5       | 0 | chr6  | 147167000 |
| -488274  | FAM75A6   | 0   | 126511   | KGFLP1       | 0 | chr9  | 44059000  |
| 5901     | SGK2      | 0   | 20687    | SGK2         | 0 | chr20 | 41627000  |
| 12350    | DNMT3L    | 0   | 3527     | DNMT3L       | 0 | chr21 | 44503000  |
| -4846    | C19orf20  | 0   | 7232     | CDC34        | 0 | chr19 | 475500    |
| -159669  | FOXF2     | 0   | 55179    | FOXC1        | 0 | chr6  | 1500500   |
| 548      | ZNF276    | 0   | 18833    | ZNF276       | 0 | chr16 | 88316000  |
| 1048     | ZNF276    | 0   | 18333    | ZNF276       | 0 | chr16 | 88316500  |
| -877     | SKP1      | 0   | 18546    | PPP2CA       | 0 | chr5  | 133541500 |
| 118      | FOKK2     | 0   | 84772    | FOKK2        | 0 | chr17 | 78071000  |
| 14623    | IGDCC4    | 0   | 26963    | IGDCC4       | 0 | chr15 | 63475500  |
| 1346     | OPLAH     | 0   | 8072     | OPLAH        | 0 | chr8  | 145179500 |
| 124462   | BANP      | 0   | 1425     | BANP         | 0 | chr16 | 86667000  |
| 124962   | BANP      | 0   | 925      | BANP         | 0 | chr16 | 86667500  |
| 125462   | BANP      | 0   | 425      | BANP         | 0 | chr16 | 86668000  |
| -15633   | SERPINB8  | 0   | 77722    | C18orf20     | 0 | chr18 | 59820500  |
| -16133   | SERPINB8  | 0   | 77222    | C18orf20     | 0 | chr18 | 59821000  |
| 8263     | MKL1      | 0   | 218136   | MKL1         | 0 | chr22 | 39144500  |
| 8763     | MKL1      | 0   | 217636   | MKL1         | 0 | chr22 | 39145000  |
| 23165    | NR5A1     | 0   | 3020     | NR5A1        | 0 | chr9  | 126306500 |
| 23665    | NR5A1     | 0   | 2520     | NR5A1        | 0 | chr9  | 126307000 |
| -3828    | COQ4      | 0   | 2660     | SLC27A4      | 0 | chr9  | 130140000 |
| -637274  | ERICH1    | 0   | 128475   | DLGAP2       | 0 | chr8  | 1308500   |
| -1483132 | FZD8      | 0   | 1290     | ANKRD30A     | 0 | chr10 | 37453500  |
| 521153   | FBXL17    | 0   | 510      | FBXL17       | 0 | chr5  | 107744500 |
| -187161  | HTR1B     | 0   | 1216907  | IRAK1BP1     | 0 | chr6  | 78417000  |
| ---      | ---       | --- | 18524187 | GOLGA8C      | 0 | chr15 | 503500    |
| -47193   | C17orf87  | 0   | 281      | RABEP1       | 0 | chr17 | 5126000   |
| 219      | RABEP1    | 0   | 103356   | RABEP1       | 0 | chr17 | 5126500   |
| 1609     | MLLT1     | 0   | 67959    | MLLT1        | 0 | chr19 | 6163000   |
| 2609     | MLLT1     | 0   | 66959    | MLLT1        | 0 | chr19 | 6164000   |
| 26179    | ZBTB46    | 0   | 34800    | ZBTB46       | 0 | chr20 | 61872500  |

|          |                   |   |        |                |   |       |           |
|----------|-------------------|---|--------|----------------|---|-------|-----------|
| 26679    | ZBTB46            | 0 | 34300  | ZBTB46         | 0 | chr20 | 61873000  |
| 27179    | ZBTB46            | 0 | 33800  | ZBTB46         | 0 | chr20 | 61873500  |
| -53441   | LOC100130238      | 0 | 156229 | FBRSL1         | 0 | chr12 | 131421000 |
| -259140  | EFEMP1            | 0 | 1761   | CCDC85A        | 0 | chr2  | 56263000  |
| -259640  | EFEMP1            | 0 | 1261   | CCDC85A        | 0 | chr2  | 56263500  |
| 24084    | SH2D3C            | 0 | 16369  | SH2D3C         | 0 | chr9  | 129564500 |
| 24584    | SH2D3C            | 0 | 15869  | SH2D3C         | 0 | chr9  | 129565000 |
| 255490   | PTPRN2            | 0 | 793243 | PTPRN2         | 0 | chr7  | 157280000 |
| -47805   | TACC3             | 0 | 336    | FGFR3          | 0 | chr4  | 1764500   |
| -100551  | C20orf112         | 0 | 48822  | C20orf203      | 0 | chr20 | 30635500  |
| -25332   | NOMO3             | 0 | 11734  | PKD1P1         | 0 | chr16 | 16321500  |
| -26673   | CSF2RA            | 0 | 8      | IL3RA          | 0 | chrX  | 1415500   |
| -73075   | MED13             | 0 | 126348 | TBC1D3P2       | 0 | chr17 | 57570500  |
| -340     | TSSC1             | 0 | 1452   | TTC15          | 0 | chr2  | 3361000   |
| -840     | TSSC1             | 0 | 952    | TTC15          | 0 | chr2  | 3361500   |
| -17667   | ZNF517            | 0 | 706    | ZNF7           | 0 | chr8  | 146023000 |
| -18167   | ZNF517            | 0 | 206    | ZNF7           | 0 | chr8  | 146023500 |
| -1202549 | CADM1             | 0 | 41100  | BUD13          | 0 | chr11 | 116083000 |
| -1203049 | CADM1             | 0 | 40600  | BUD13          | 0 | chr11 | 116083500 |
| -177540  | 4F16,OR4F29,OR4F3 | 0 | 74958  | 6,OR4F29,OR4F3 | 0 | chr1  | 536000    |
| -11134   | SLC29A1           | 0 | 1826   | HSP90AB1       | 0 | chr6  | 44321000  |
| -213     | LOC100131551      | 0 | 28688  | CPN2           | 0 | chr3  | 195513500 |
| -713     | LOC100131551      | 0 | 28188  | CPN2           | 0 | chr3  | 195514000 |
| -8991    | SNRPD3            | 0 | 2217   | GGT1           | 0 | chr22 | 23307500  |
| -913     | CDH24             | 0 | 113    | ACIN1          | 0 | chr14 | 22597500  |
| -3624    | C9orf50           | 0 | 1755   | METTL11A       | 0 | chr9  | 131426500 |
| 4682     | LOC26102          | 0 | 100    | LOC26102       | 0 | chr9  | 138341500 |
| 248      | GPSM1             | 0 | 31878  | GPSM1          | 0 | chr9  | 138342000 |
| 45492    | FGFR1             | 0 | 9      | FGFR1          | 0 | chr8  | 38445500  |
| -491     | FGFR1             | 0 | 41508  | C8orf86        | 0 | chr8  | 38446000  |
| 219      | TRNP1             | 0 | 6964   | TRNP1          | 0 | chr1  | 27193000  |
| 20433    | GOLGA3            | 0 | 39361  | GOLGA3         | 0 | chr12 | 131876000 |
| -167     | MAP1D             | 0 | 4453   | DLX1           | 0 | chr2  | 172654000 |
| -33268   | FGFR4             | 0 | 1685   | NSD1           | 0 | chr5  | 176491000 |
| -33768   | FGFR4             | 0 | 1185   | NSD1           | 0 | chr5  | 176491500 |
| -54611   | TCF20             | 0 | 110357 | NFAM1          | 0 | chr22 | 40996000  |
| 13333    | EFNA2             | 0 | 444    | EFNA2          | 0 | chr19 | 1250500   |
| -56      | EFNA2             | 0 | 54975  | MUM1           | 0 | chr19 | 1251000   |
| 98347    | CAMSAP1           | 0 | 326    | CAMSAP1        | 0 | chr9  | 137938500 |
| -174     | CAMSAP1           | 0 | 25635  | UBAC1          | 0 | chr9  | 137939000 |
| -674     | CAMSAP1           | 0 | 25135  | UBAC1          | 0 | chr9  | 137939500 |
| -461     | TMEM41A           | 0 | 8263   | LIPH           | 0 | chr3  | 186700000 |
| 45620    | CCDC79            | 0 | 1024   | CCDC79         | 0 | chr16 | 65392000  |
| 16479    | ZFR2              | 0 | 48527  | ZFR2           | 0 | chr19 | 3771500   |
| -16262   | PSMD3             | 0 | 1213   | CSF3           | 0 | chr17 | 35424000  |
| -25588   | TNFRSF19          | 0 | 35327  | MIPEP          | 0 | chr13 | 23167000  |
| 24167    | SLC9A3            | 0 | 27049  | SLC9A3         | 0 | chr5  | 550500    |
| 24667    | SLC9A3            | 0 | 26549  | SLC9A3         | 0 | chr5  | 551000    |
| 2205     | ALPPL2            | 0 | 1669   | ALPPL2         | 0 | chr2  | 232982000 |
| 2705     | ALPPL2            | 0 | 1169   | ALPPL2         | 0 | chr2  | 232982500 |
| 4033     | RUNX1             | 0 | 257465 | RUNX1          | 0 | chr21 | 35086000  |
| 22604    | FBXL19            | 0 | 1605   | FBXL19         | 0 | chr16 | 30866000  |
| 9473     | PLAC4             | 0 | 536    | PLAC4          | 0 | chr21 | 41478500  |
| -75127   | RASGEF1A          | 0 | 29597  | FXRD4          | 0 | chr10 | 43157500  |
| -75627   | RASGEF1A          | 0 | 29097  | FXRD4          | 0 | chr10 | 43158000  |
| -8135    | ZNF69             | 0 | 2399   | ZNF700         | 0 | chr19 | 11894500  |
| -8635    | ZNF69             | 0 | 1899   | ZNF700         | 0 | chr19 | 11895000  |
| 10525    | KCNQ2             | 0 | 28437  | KCNQ2          | 0 | chr20 | 61546000  |

|         |           |   |     |        |          |     |       |           |
|---------|-----------|---|-----|--------|----------|-----|-------|-----------|
| 11025   | KCNQ2     | 0 |     | 27937  | KCNQ2    | 0   | chr20 | 61546500  |
| 11525   | KCNQ2     | 0 |     | 27437  | KCNQ2    | 0   | chr20 | 61547000  |
| -13642  | SULT1A1   | 0 |     | 87782  | EIF3C    | 0   | chr16 | 28542500  |
| -14142  | SULT1A1   | 0 |     | 87282  | EIF3C    | 0   | chr16 | 28543000  |
| -772    | C1orf222  | 0 |     | 24611  | KIAA1751 | 0   | chr1  | 1850000   |
| 148     | OR11L1    | 0 |     | 821    | OR11L1   | 0   | chr1  | 246071000 |
| -19552  | S1PR2     | 0 |     | 1139   | MRPL4    | 0   | chr19 | 10222500  |
| 226     | MAGEA2    | 0 |     | 3751   | MAGEA2   | 0   | chrX  | 151634000 |
| 21337   | CDH15     | 0 |     | 2401   | CDH15    | 0   | chr16 | 87787000  |
| 21837   | CDH15     | 0 |     | 1901   | CDH15    | 0   | chr16 | 87787500  |
| -26991  | THEG      | 0 |     | 2443   | C2CD4C   | 0   | chr19 | 354000    |
| 587     | TBC1D16   | 0 |     | 95242  | TBC1D16  | 0   | chr17 | 75529000  |
| 1087    | TBC1D16   | 0 |     | 94742  | TBC1D16  | 0   | chr17 | 75529500  |
| 51400   | SLC22A16  | 0 |     | 537    | SLC22A16 | 0   | chr6  | 110904000 |
| 51900   | SLC22A16  | 0 |     | 37     | SLC22A16 | 0   | chr6  | 110904500 |
| -21612  | RRP1B     | 0 |     | 1405   | PDXK     | 0   | chr21 | 43962000  |
| -22112  | RRP1B     | 0 |     | 905    | PDXK     | 0   | chr21 | 43962500  |
| -19102  | MXD3      | 0 |     | 169    | LMAN2    | 0   | chr5  | 176691000 |
| 331     | LMAN2     | 0 |     | 19991  | LMAN2    | 0   | chr5  | 176691500 |
| -1187   | C19orf29  | 0 |     | 2181   | PIP5K1C  | 0   | chr19 | 3579000   |
| -1687   | C19orf29  | 0 |     | 1681   | PIP5K1C  | 0   | chr19 | 3579500   |
| 1467    | CD248     | 0 |     | 1091   | CD248    | 0   | chr11 | 65840000  |
| -572    | PITPNM2   | 0 |     | 45398  | MPHOSPH9 | 0   | chr12 | 122161500 |
| -484    | SNORD105B | 0 |     | 1196   | P2RY11   | 0   | chr19 | 10082000  |
| 7647    | SRSF9     | 0 |     | 441    | SRSF9    | 0   | chr12 | 119391500 |
| -59     | SRSF9     | 0 |     | 42     | DYNLL1   | 0   | chr12 | 119392000 |
| 458     | DYNLL1    | 0 |     | 28181  | DYNLL1   | 0   | chr12 | 119392500 |
| 493     | ZDHHC20   | 0 |     | 82423  | ZDHHC20  | 0   | chr13 | 20849000  |
| 993     | ZDHHC20   | 0 |     | 81923  | ZDHHC20  | 0   | chr13 | 20849500  |
| 9455    | PRSSL1    | 0 |     | 461    | PRSSL1   | 0   | chr19 | 646000    |
| 27962   | FBXO32    | 0 |     | 10127  | FBXO32   | 0   | chr8  | 124612500 |
| 28462   | FBXO32    | 0 |     | 9627   | FBXO32   | 0   | chr8  | 124613000 |
| -31766  | PRDM7     | 0 | --- |        | ---      | --- | chr16 | 88688000  |
| -32266  | PRDM7     | 0 | --- |        | ---      | --- | chr16 | 88688500  |
| 4875    | ADAMTS10  | 0 |     | 25588  | ADAMTS10 | 0   | chr19 | 8556000   |
| -376058 | POTEG     | 0 |     | 22953  | POTEM    | 0   | chr14 | 19031000  |
| 102894  | MACROD1   | 0 |     | 64661  | MACROD1  | 0   | chr11 | 63625500  |
| 9228    | LASS2     | 0 |     | 564    | LASS2    | 0   | chr1  | 149213500 |
| 9728    | LASS2     | 0 |     | 64     | LASS2    | 0   | chr1  | 149214000 |
| 901     | SEMA6B    | 0 |     | 15003  | SEMA6B   | 0   | chr19 | 4494500   |
| 1401    | SEMA6B    | 0 |     | 14503  | SEMA6B   | 0   | chr19 | 4495000   |
| 6108    | INPP5E    | 0 |     | 5077   | INPP5E   | 0   | chr9  | 138449000 |
| 12607   | MMP17     | 0 |     | 10769  | MMP17    | 0   | chr12 | 130891500 |
| 266426  | GLI3      | 0 |     | 9643   | GLI3     | 0   | chr7  | 42233500  |
| 45      | CNTD2     | 0 |     | 4404   | CNTD2    | 0   | chr19 | 45420000  |
| 6557    | SLC17A9   | 0 |     | 9394   | SLC17A9  | 0   | chr20 | 61061000  |
| 7057    | SLC17A9   | 0 |     | 8894   | SLC17A9  | 0   | chr20 | 61061500  |
| 420781  | RPTOR     | 0 |     | 768    | RPTOR    | 0   | chr17 | 76554000  |
| 421281  | RPTOR     | 0 |     | 268    | RPTOR    | 0   | chr17 | 76554500  |
| -236540 | IQSEC1    | 0 |     | 112236 | NUP210   | 0   | chr3  | 13220500  |
| -113806 | C22orf34  | 0 |     | 1940   | BRD1     | 0   | chr22 | 48551000  |
| -628    | LIG1      | 0 |     | 37154  | CARD8    | 0   | chr19 | 53366000  |
| -1128   | LIG1      | 0 |     | 36654  | CARD8    | 0   | chr19 | 53366500  |
| -1628   | LIG1      | 0 |     | 36154  | CARD8    | 0   | chr19 | 53367000  |
| 3895    | SLC39A4   | 0 |     | 581    | SLC39A4  | 0   | chr8  | 145612500 |
| 4395    | SLC39A4   | 0 |     | 81     | SLC39A4  | 0   | chr8  | 145613000 |
| 730     | POFUT2    | 0 |     | 23239  | POFUT2   | 0   | chr21 | 45509000  |
| 1089    | DLX2      | 0 |     | 2224   | DLX2     | 0   | chr2  | 172673500 |

|         |            |   |         |             |   |       |           |
|---------|------------|---|---------|-------------|---|-------|-----------|
| 1589    | DLX2       | 0 | 1724    | DLX2        | 0 | chr2  | 172674000 |
| 21167   | SLC9A3     | 0 | 30049   | SLC9A3      | 0 | chr5  | 547500    |
| -10148  | CCDC126    | 0 | 25273   | C7orf46     | 0 | chr7  | 23661000  |
| -10648  | CCDC126    | 0 | 24773   | C7orf46     | 0 | chr7  | 23661500  |
| 210956  | ZDHHC14    | 0 | 81465   | ZDHHC14     | 0 | chr6  | 157933500 |
| 211456  | ZDHHC14    | 0 | 80965   | ZDHHC14     | 0 | chr6  | 157934000 |
| -102927 | PLIN2      | 0 | 60248   | DENND4C     | 0 | chr9  | 19220500  |
| 8491    | ABR        | 0 | 175366  | ABR         | 0 | chr17 | 862000    |
| 8991    | ABR        | 0 | 174866  | ABR         | 0 | chr17 | 862500    |
| 14057   | KANK2      | 0 | 19224   | KANK2       | 0 | chr19 | 11150000  |
| 14557   | KANK2      | 0 | 18724   | KANK2       | 0 | chr19 | 11150500  |
| -27183  | ZFP37      | 0 | 20826   | NCRNA00256B | 0 | chr9  | 114886000 |
| -27683  | ZFP37      | 0 | 20326   | NCRNA00256B | 0 | chr9  | 114886500 |
| -47647  | FAM48B2    | 0 | 1798    | FAM48B1     | 0 | chrX  | 24289000  |
| 534     | NCRNA00174 | 0 | 23830   | NCRNA00174  | 0 | chr7  | 65479000  |
| -143316 | NCRNA00168 | 0 | 1367251 | PFKP        | 0 | chr10 | 1732500   |
| -1636   | ALDH3A1    | 0 | 23735   | ULK2        | 0 | chr17 | 19591000  |
| -5402   | OTX2       | 0 | 391446  | EXOC5       | 0 | chr14 | 56347500  |
| -5902   | OTX2       | 0 | 390946  | EXOC5       | 0 | chr14 | 56348000  |
| -6402   | OTX2       | 0 | 390446  | EXOC5       | 0 | chr14 | 56348500  |
| -6902   | OTX2       | 0 | 389946  | EXOC5       | 0 | chr14 | 56349000  |
| 9933    | E4F1       | 0 | 2244    | E4F1        | 0 | chr16 | 2223500   |
| 10433   | E4F1       | 0 | 1744    | E4F1        | 0 | chr16 | 2224000   |
| 59335   | UNC5A      | 0 | 11005   | UNC5A       | 0 | chr5  | 176229500 |
| 4001    | POLR3K     | 0 | 2625    | POLR3K      | 0 | chr16 | 41000     |
| 4501    | POLR3K     | 0 | 2125    | POLR3K      | 0 | chr16 | 41500     |
| -30432  | SMCR5      | 0 | 2110    | SREBF1      | 0 | chr17 | 17654000  |
| 10610   | RAPSN      | 0 | 806     | RAPSN       | 0 | chr11 | 47426500  |
| 11110   | RAPSN      | 0 | 306     | RAPSN       | 0 | chr11 | 47427000  |
| -194    | RAPSN      | 0 | 19020   | CELF1       | 0 | chr11 | 47427500  |
| -19683  | ---        | 0 | 851     | SCNN1D      | 0 | chr1  | 1206500   |
| -20183  | ---        | 0 | 351     | SCNN1D      | 0 | chr1  | 1207000   |
| -215795 | NBPF24     | 0 | 80145   | FLJ39739    | 0 | chr1  | 146292500 |
| -216295 | NBPF24     | 0 | 79645   | FLJ39739    | 0 | chr1  | 146293000 |
| 463     | INTS4L1    | 0 | 92534   | INTS4L1     | 0 | chr7  | 64239500  |
| 5590    | ADAM8      | 0 | 8862    | ADAM8       | 0 | chr10 | 134931500 |
| 786777  | TMEM132D   | 0 | 45165   | TMEM132D    | 0 | chr12 | 128909000 |
| 10031   | PPP2R3B    | 0 | 42627   | PPP2R3B     | 0 | chrX  | 225000    |
| -421    | ZNF280D    | 0 | 152159  | LOC145783   | 0 | chr15 | 54813500  |
| 5912    | FAM38A     | 0 | 15318   | FAM38A      | 0 | chr16 | 87315000  |
| 6412    | FAM38A     | 0 | 14818   | FAM38A      | 0 | chr16 | 87315500  |
| 30288   | TBC1D22A   | 0 | 380888  | TBC1D22A    | 0 | chr22 | 45567500  |
| 31288   | TBC1D22A   | 0 | 379888  | TBC1D22A    | 0 | chr22 | 45568500  |
| 10360   | TBC1D17    | 0 | 813     | TBC1D17     | 0 | chr19 | 55083000  |
| 10860   | TBC1D17    | 0 | 313     | TBC1D17     | 0 | chr19 | 55083500  |
| 20634   | C18orf1    | 0 | 11253   | C18orf1     | 0 | chr18 | 13631500  |
| 21134   | C18orf1    | 0 | 10753   | C18orf1     | 0 | chr18 | 13632000  |
| -133058 | NHLRC2     | 0 | 2295    | ADRB1       | 0 | chr10 | 115791500 |
| -11517  | PNMA3      | 0 | 457     | PNMA6A      | 0 | chrX  | 151991000 |
| -85664  | CRYBB2     | 0 | 387     | IGLL3       | 0 | chr22 | 24043500  |
| 113     | IGLL3      | 0 | 2192    | IGLL3       | 0 | chr22 | 24044000  |
| -498125 | HERC2P4    | 0 | 22841   | TP53TG3B    | 0 | chr16 | 32569500  |
| 6973    | ZNF436     | 0 | 1966    | ZNF436      | 0 | chr1  | 23565500  |
| 7473    | ZNF436     | 0 | 1466    | ZNF436      | 0 | chr1  | 23566000  |
| -47423  | ZNF275     | 0 | 17974   | ZFP92       | 0 | chrX  | 152319000 |
| -47923  | ZNF275     | 0 | 17474   | ZFP92       | 0 | chrX  | 152319500 |
| 23531   | PPP2R3B    | 0 | 29127   | PPP2R3B     | 0 | chrY  | 238500    |
| 24031   | PPP2R3B    | 0 | 28627   | PPP2R3B     | 0 | chrY  | 239000    |



|         |              |   |         |          |   |       |           |
|---------|--------------|---|---------|----------|---|-------|-----------|
| 24531   | PPP2R3B      | 0 | 28127   | PPP2R3B  | 0 | chrY  | 239500    |
| -372385 | FAM92B       | 0 | 126529  | KIAA0182 | 0 | chr16 | 84076000  |
| -373385 | FAM92B       | 0 | 125529  | KIAA0182 | 0 | chr16 | 84077000  |
| -10957  | ZNF217       | 0 | 280446  | SUMO1P1  | 0 | chr20 | 51644000  |
| -1053   | DENND5A      | 0 | 14277   | TMEM41B  | 0 | chr11 | 9244500   |
| -1553   | DENND5A      | 0 | 13777   | TMEM41B  | 0 | chr11 | 9245000   |
| 3140    | CYP2W1       | 0 | 3302    | CYP2W1   | 0 | chr7  | 992500    |
| 3640    | CYP2W1       | 0 | 2802    | CYP2W1   | 0 | chr7  | 993000    |
| 4967    | ANO8         | 0 | 6638    | ANO8     | 0 | chr19 | 17300000  |
| 310990  | GNAQ         | 0 | 12      | GNAQ     | 0 | chr9  | 79836000  |
| 397     | PRDM16       | 0 | 369045  | PRDM16   | 0 | chr1  | 2976000   |
| -874967 | CNTN3        | 0 | 25394   | FAM86DP  | 0 | chr3  | 75528000  |
| 5297    | TSEN54       | 0 | 2915    | TSEN54   | 0 | chr17 | 71029500  |
| -531    | SLC12A4      | 0 | 11066   | DPEP3    | 0 | chr16 | 66556000  |
| -30406  | CIDEA        | 0 | 256     | TUBB6    | 0 | chr18 | 12298000  |
| 13787   | TMCC2        | 0 | 31593   | TMCC2    | 0 | chr1  | 203477500 |
| -260116 | QKI          | 0 | 1438142 | C6orf118 | 0 | chr6  | 164175000 |
| -260616 | QKI          | 0 | 1437642 | C6orf118 | 0 | chr6  | 164175500 |
| -261116 | QKI          | 0 | 1437142 | C6orf118 | 0 | chr6  | 164176000 |
| -84298  | LOC654342    | 0 | 31094   | GGT8P    | 0 | chr2  | 91296000  |
| -84798  | LOC654342    | 0 | 30594   | GGT8P    | 0 | chr2  | 91296500  |
| -85298  | LOC654342    | 0 | 30094   | GGT8P    | 0 | chr2  | 91297000  |
| -674    | ENTPD2       | 0 | 7399    | C9orf140 | 0 | chr9  | 139069000 |
| -252005 | ANKRD30BL    | 0 | 2616    | GPR39    | 0 | chr2  | 132888000 |
| -252505 | ANKRD30BL    | 0 | 2116    | GPR39    | 0 | chr2  | 132888500 |
| -2427   | AQP12A       | 0 | 12856   | KIF1A    | 0 | chr2  | 241289000 |
| -2927   | AQP12A       | 0 | 12356   | KIF1A    | 0 | chr2  | 241289500 |
| -37113  | GTPBP6       | 0 | 6969    | PPP2R3B  | 0 | chrY  | 208000    |
| -37613  | GTPBP6       | 0 | 6469    | PPP2R3B  | 0 | chrY  | 208500    |
| 2634    | SEPT9        | 0 | 124773  | SEPT9    | 0 | chr17 | 72883500  |
| 472     | PITX2        | 0 | 19457   | PITX2    | 0 | chr4  | 111758500 |
| 972     | PITX2        | 0 | 18957   | PITX2    | 0 | chr4  | 111759000 |
| 34139   | UGT1A10      | 0 | 102690  | UGT1A10  | 0 | chr2  | 234244000 |
| 34639   | UGT1A10      | 0 | 102190  | UGT1A10  | 0 | chr2  | 234244500 |
| 23230   | POFUT2       | 0 | 739     | POFUT2   | 0 | chr21 | 45531500  |
| 49198   | PCBP3        | 0 | 43296   | PCBP3    | 0 | chr21 | 46143500  |
| 40714   | TERT         | 0 | 1162    | TERT     | 0 | chr5  | 1347000   |
| 41214   | TERT         | 0 | 662     | TERT     | 0 | chr5  | 1347500   |
| -4336   | LOC100131726 | 0 | 12911   | C8orf76  | 0 | chr8  | 124288500 |
| 19776   | CABLES1      | 0 | 104932  | CABLES1  | 0 | chr18 | 18989500  |
| 214     | CABLES1      | 0 | 104432  | CABLES1  | 0 | chr18 | 18990000  |
| -54484  | PIKFYVE      | 0 | 46800   | PTH2R    | 0 | chr2  | 208933000 |
| -54984  | PIKFYVE      | 0 | 46300   | PTH2R    | 0 | chr2  | 208933500 |
| -20564  | OR10H1       | 0 | 256     | UCA1     | 0 | chr19 | 15800500  |
| -561    | PBX4         | 0 | 4465    | LPAR2    | 0 | chr19 | 19591000  |
| -48683  | YAF2         | 0 | 25154   | ZCRB1    | 0 | chr12 | 40967000  |
| -396    | FGF22        | 0 | 3525    | RNF126   | 0 | chr19 | 595000    |
| -896    | FGF22        | 0 | 3025    | RNF126   | 0 | chr19 | 595500    |
| 221     | OSTalpha     | 0 | 16696   | OSTalpha | 0 | chr3  | 197428000 |
| 41047   | MAD1L1       | 0 | 376109  | MAD1L1   | 0 | chr7  | 1863000   |
| -9303   | PKD1P1       | 0 | 31182   | NOMO2    | 0 | chr16 | 18387500  |
| 440     | DCLRE1B      | 0 | 8217    | DCLRE1B  | 0 | chr1  | 114250000 |
| 87732   | APBA1        | 0 | 157095  | APBA1    | 0 | chr9  | 71320000  |
| 88232   | APBA1        | 0 | 156595  | APBA1    | 0 | chr9  | 71320500  |
| 8643    | PMS2L4       | 0 | 1341    | PMS2L4   | 0 | chr7  | 66403500  |
| -81280  | MRP63        | 0 | 116007  | ZDHHC20  | 0 | chr13 | 20732500  |
| -1696   | NLRP6        | 0 | 2137    | ATHL1    | 0 | chr11 | 277000    |
| -2196   | NLRP6        | 0 | 1637    | ATHL1    | 0 | chr11 | 277500    |

|           |            |   |         |              |   |       |           |
|-----------|------------|---|---------|--------------|---|-------|-----------|
| -2696     | NLRP6      | 0 | 1137    | ATHL1        | 0 | chr11 | 278000    |
| 181161    | AFAP1      | 0 | 53      | AFAP1        | 0 | chr4  | 7992500   |
| 1018      | DNTTIP1    | 0 | 18473   | DNTTIP1      | 0 | chr20 | 43855000  |
| -362316   | MAGEB6     | 0 | 374     | VENTXP1      | 0 | chrX  | 26486000  |
| -268      | SAMD1      | 0 | 1006    | PRKACA       | 0 | chr19 | 14062500  |
| 81        | YAP1       | 0 | 122864  | YAP1         | 0 | chr11 | 101486500 |
| 12564     | PMPCA      | 0 | 534     | PMPCA        | 0 | chr9  | 138437500 |
| -2615207  | C4orf33    | 0 | 1421419 | PCDH10       | 0 | chr4  | 132868500 |
| -2615707  | C4orf33    | 0 | 1420919 | PCDH10       | 0 | chr4  | 132869000 |
| 128       | ZBTB12     | 0 | 2248    | ZBTB12       | 0 | chr6  | 31975500  |
| 628       | ZBTB12     | 0 | 1748    | ZBTB12       | 0 | chr6  | 31976000  |
| -102895   | NGEF       | 0 | 1625    | NEU2         | 0 | chr2  | 233604000 |
| 2550      | HAPLN4     | 0 | 4596    | HAPLN4       | 0 | chr19 | 19230000  |
| -1170     | PALM       | 0 | 1645    | C19orf21     | 0 | chr19 | 700500    |
| -14094    | TKTL1      | 0 | 4093    | FLNA         | 0 | chrX  | 153226000 |
| -14594    | TKTL1      | 0 | 3593    | FLNA         | 0 | chrX  | 153226500 |
| -15094    | TKTL1      | 0 | 3093    | FLNA         | 0 | chrX  | 153227000 |
| 377       | B3GALT5    | 0 | 5185    | B3GALT5      | 0 | chr21 | 39951500  |
| 11982     | ELK4       | 0 | 1623    | ELK4         | 0 | chr1  | 203867000 |
| 4541      | NKX6-1     | 0 | 411     | NKX6-1       | 0 | chr4  | 85638000  |
| 4735      | CCDC106    | 0 | 838     | CCDC106      | 0 | chr19 | 60855500  |
| -21293791 | EMBP1      | 0 | 2010353 | LOC100286793 | 0 | chr1  | 142309000 |
| 34167     | SLC9A3     | 0 | 17049   | SLC9A3       | 0 | chr5  | 560500    |
| 66353     | DOT1L      | 0 | 2077    | DOT1L        | 0 | chr19 | 2181500   |
| -346348   | NCRNA00120 | 0 | 225     | SPACA1       | 0 | chr6  | 88814000  |
| -54505    | CTDP1      | 0 | 54655   | KCNG2        | 0 | chr18 | 75670000  |
| 9966      | PLXNB2     | 0 | 9836    | PLXNB2       | 0 | chr22 | 49065500  |
| 10466     | PLXNB2     | 0 | 9336    | PLXNB2       | 0 | chr22 | 49066000  |
| 1227      | TPSD1      | 0 | 995     | TPSD1        | 0 | chr16 | 1247500   |
| 51897     | PRDM16     | 0 | 317545  | PRDM16       | 0 | chr1  | 3027500   |
| 12        | TXNDC2     | 0 | 2156    | TXNDC2       | 0 | chr18 | 9876000   |
| 14964     | ARID3A     | 0 | 31803   | ARID3A       | 0 | chr19 | 892000    |
| 15964     | ARID3A     | 0 | 30803   | ARID3A       | 0 | chr19 | 893000    |
| -28581    | CPEB4      | 0 | 267     | C5orf47      | 0 | chr5  | 173348500 |
| -698      | JAKMIP3    | 0 | 1403    | DPYSL4       | 0 | chr10 | 133849000 |
| -1198     | JAKMIP3    | 0 | 903     | DPYSL4       | 0 | chr10 | 133849500 |
| 16148     | TELO2      | 0 | 960     | TELO2        | 0 | chr16 | 1499500   |
| 16648     | TELO2      | 0 | 460     | TELO2        | 0 | chr16 | 1500000   |
| 16379     | C1orf106   | 0 | 4486    | C1orf106     | 0 | chr1  | 199147000 |
| 16879     | C1orf106   | 0 | 3986    | C1orf106     | 0 | chr1  | 199147500 |
| -779989   | C5orf38    | 0 | 60667   | IRX1         | 0 | chr5  | 3588500   |
| -780489   | C5orf38    | 0 | 60167   | IRX1         | 0 | chr5  | 3589000   |
| 344       | HDGFL1     | 0 | 729     | HDGFL1       | 0 | chr6  | 22678000  |
| -51761    | PSMG2      | 0 | 7979    | PTPN2        | 0 | chr18 | 12767500  |
| 172877    | KDM4B      | 0 | 11608   | KDM4B        | 0 | chr19 | 5093000   |
| 173377    | KDM4B      | 0 | 11108   | KDM4B        | 0 | chr19 | 5093500   |
| -35341    | RRN3       | 0 | 266111  | MPV17L       | 0 | chr16 | 15131000  |
| -35841    | RRN3       | 0 | 265611  | MPV17L       | 0 | chr16 | 15131500  |
| -15714    | LOC407835  | 0 | 947     | TSPAN33      | 0 | chr7  | 128571000 |
| -324077   | FAM21B     | 0 | 12361   | LOC642826    | 0 | chr10 | 47793500  |
| -324577   | FAM21B     | 0 | 11861   | LOC642826    | 0 | chr10 | 47794000  |
| -829      | RGS16      | 0 | 41414   | RGS8         | 0 | chr1  | 180841000 |
| -1329     | RGS16      | 0 | 40914   | RGS8         | 0 | chr1  | 180841500 |
| -388      | LRTM1      | 0 | 537282  | WNT5A        | 0 | chr3  | 54937500  |
| -36841    | RRN3       | 0 | 264611  | MPV17L       | 0 | chr16 | 15132500  |
| 15905     | TP73       | 0 | 27327   | TP73         | 0 | chr1  | 3613000   |
| -15803    | RASA3      | 0 | 86463   | CDC16        | 0 | chr13 | 113932000 |
| -128158   | USP7       | 0 | 37      | C16orf72     | 0 | chr16 | 9093000   |

|         |                 |   |     |        |              |     |       |           |
|---------|-----------------|---|-----|--------|--------------|-----|-------|-----------|
| 463     | C16orf72        | 0 |     | 27556  | C16orf72     | 0   | chr16 | 9093500   |
| 120462  | BANP            | 0 |     | 5425   | BANP         | 0   | chr16 | 86663000  |
| 120962  | BANP            | 0 |     | 4925   | BANP         | 0   | chr16 | 86663500  |
| 1633    | IZUMO4          | 0 |     | 1083   | IZUMO4       | 0   | chr19 | 2049500   |
| 21938   | ADAP1           | 0 |     | 34815  | ADAP1        | 0   | chr7  | 926000    |
| 22438   | ADAP1           | 0 |     | 34315  | ADAP1        | 0   | chr7  | 926500    |
| 22938   | ADAP1           | 0 |     | 33815  | ADAP1        | 0   | chr7  | 927000    |
| 557     | MGMT            | 0 |     | 299773 | MGMT         | 0   | chr10 | 131156000 |
| -144718 | CRIPAK          | 0 |     | 87104  | FAM53A       | 0   | chr4  | 1524500   |
| 6427    | CILP2           | 0 |     | 1968   | CILP2        | 0   | chr19 | 19516500  |
| 6927    | CILP2           | 0 |     | 1468   | CILP2        | 0   | chr19 | 19517000  |
| 7427    | CILP2           | 0 |     | 968    | CILP2        | 0   | chr19 | 19517500  |
| -118    | GPS2            | 0 |     | 174    | NEURL4       | 0   | chr17 | 7159500   |
| -57225  | RANBP9          | 0 |     | 21998  | CCDC90A      | 0   | chr6  | 13877000  |
| -102395 | NGEF            | 0 |     | 2125   | NEU2         | 0   | chr2  | 233603500 |
| -68168  | 4F3,OR4F29,OR4I | 0 | --- |        | ---          | --- | chr5  | 180796000 |
| -68668  | 4F3,OR4F29,OR4I | 0 | --- |        | ---          | --- | chr5  | 180796500 |
| -720    | PNPLA4          | 0 |     | 241484 | VCX2         | 0   | chrX  | 7856500   |
| -7774   | EPS8L2          | 0 |     | 11931  | TALDO1       | 0   | chr11 | 725500    |
| -8274   | EPS8L2          | 0 |     | 11431  | TALDO1       | 0   | chr11 | 726000    |
| -8774   | EPS8L2          | 0 |     | 10931  | TALDO1       | 0   | chr11 | 726500    |
| 8326    | C16orf88        | 0 |     | 3493   | C16orf88     | 0   | chr16 | 19633500  |
| 175     | F2RL3           | 0 |     | 2830   | F2RL3        | 0   | chr19 | 16861000  |
| 620547  | CDH4            | 0 |     | 64194  | CDH4         | 0   | chr20 | 59881500  |
| -2035   | AXIN1           | 0 |     | 12896  | MRPL28       | 0   | chr16 | 344500    |
| -51574  | VPREB1          | 0 |     | 962    | LOC96610     | 0   | chr22 | 20981500  |
| 1894    | MACROD1         | 0 |     | 165661 | MACROD1      | 0   | chr11 | 63524500  |
| -48495  | TPO             | 0 |     | 40665  | PXDN         | 0   | chr2  | 1574000   |
| -48995  | TPO             | 0 |     | 40165  | PXDN         | 0   | chr2  | 1574500   |
| -49495  | TPO             | 0 |     | 39665  | PXDN         | 0   | chr2  | 1575000   |
| -504146 | GYPA            | 0 |     | 1122   | HHIP         | 0   | chr4  | 145785500 |
| 10057   | GRIN2D          | 0 |     | 40000  | GRIN2D       | 0   | chr19 | 53600000  |
| -1124   | KRT74           | 0 |     | 10639  | KRT72        | 0   | chr12 | 51255000  |
| 921     | CBLN3           | 0 |     | 2071   | CBLN3        | 0   | chr14 | 23966500  |
| -39957  | LOC440040       | 0 |     | 102050 | OR4C13       | 0   | chr11 | 49828500  |
| -40457  | LOC440040       | 0 |     | 101550 | OR4C13       | 0   | chr11 | 49829000  |
| -68507  | OAS2            | 0 |     | 544    | DTX1         | 0   | chr12 | 111979500 |
| 456     | DTX1            | 0 |     | 39716  | DTX1         | 0   | chr12 | 111980500 |
| -3496   | MGC29506        | 0 |     | 3356   | SPATA24      | 0   | chr5  | 138757000 |
| 432     | OR7E156P        | 0 |     | 4702   | OR7E156P     | 0   | chr13 | 63210000  |
| -321    | PKN1            | 0 |     | 277    | PTGER1       | 0   | chr19 | 14444000  |
| 223     | PTGER1          | 0 |     | 2674   | PTGER1       | 0   | chr19 | 14444500  |
| 723     | PTGER1          | 0 |     | 2174   | PTGER1       | 0   | chr19 | 14445000  |
| -3      | NOVA2           | 0 |     | 21678  | CCDC61       | 0   | chr19 | 51168500  |
| 428     | DEF6            | 0 |     | 23526  | DEF6         | 0   | chr6  | 35374000  |
| -45471  | LOC648740       | 0 |     | 521    | AMY2A        | 0   | chr1  | 103961000 |
| -45971  | LOC648740       | 0 |     | 21     | AMY2A        | 0   | chr1  | 103961500 |
| -926    | DAPK2           | 0 |     | 25313  | FAM96A       | 0   | chr15 | 62126500  |
| 83590   | FBXW4           | 0 |     | 733    | FBXW4        | 0   | chr10 | 103444000 |
| 6437    | ZNF205          | 0 |     | 1519   | ZNF205       | 0   | chr16 | 3109000   |
| 7991    | DACT1           | 0 |     | 2291   | DACT1        | 0   | chr14 | 58182500  |
| 3671    | KLHL17          | 0 |     | 1458   | KLHL17       | 0   | chr1  | 889500    |
| -207573 | FAM182B         | 0 |     | 934    | LOC100134868 | 0   | chr20 | 25937500  |
| -123557 | CTBP2           | 0 |     | 422929 | LOC100169752 | 0   | chr10 | 126830000 |
| 407     | CLDN15          | 0 |     | 5336   | CLDN15       | 0   | chr7  | 100662500 |
| 74015   | STK32C          | 0 |     | 26467  | STK32C       | 0   | chr10 | 133945000 |
| 74515   | STK32C          | 0 |     | 25967  | STK32C       | 0   | chr10 | 133945500 |
| 75015   | STK32C          | 0 |     | 25467  | STK32C       | 0   | chr10 | 133946000 |

|         |                 |     |         |                |   |       |           |
|---------|-----------------|-----|---------|----------------|---|-------|-----------|
| 83587   | TBC1D16         | 0   | 12242   | TBC1D16        | 0 | chr17 | 75612000  |
| 84087   | TBC1D16         | 0   | 11742   | TBC1D16        | 0 | chr17 | 75612500  |
| -1550   | APOB            | 0   | 2703037 | ATAD2B         | 0 | chr2  | 21122000  |
| -1651   | JPH4            | 0   | 55912   | DHRS2          | 0 | chr14 | 23119500  |
| 1618    | EGFL8           | 0   | 2040    | EGFL8          | 0 | chr6  | 32242000  |
| 4551    | GAA             | 0   | 13774   | GAA            | 0 | chr17 | 75694500  |
| -625    | HERC2P4         | 0   | 520341  | TP53TG3B       | 0 | chr16 | 32072000  |
| -165616 | BARX2           | 0   | 197950  | TMEM45B        | 0 | chr11 | 128993000 |
| -166116 | BARX2           | 0   | 197450  | TMEM45B        | 0 | chr11 | 128993500 |
| -3896   | FGF22           | 0   | 25      | RNF126         | 0 | chr19 | 598500    |
| 475     | RNF126          | 0   | 15227   | RNF126         | 0 | chr19 | 599000    |
| 22111   | MAP7D1          | 0   | 2528    | MAP7D1         | 0 | chr1  | 36416500  |
| 19587   | NCOR2           | 0   | 191602  | NCOR2          | 0 | chr12 | 123394500 |
| 20587   | NCOR2           | 0   | 190602  | NCOR2          | 0 | chr12 | 123395500 |
| -46571  | ZNF519          | 0   | 158421  | LOC284233      | 0 | chr18 | 14169000  |
| 102672  | TUBGCP3         | 0   | 482     | TUBGCP3        | 0 | chr13 | 112290000 |
| -10950  | LOC654433       | 0   | 159852  | CBWD2          | 0 | chr2  | 113752000 |
| ---     | ---             | --- | 551     | FAM20C         | 0 | chr7  | 287500    |
| -12148  | ARFGAP3         | 0   | 1380    | PACSIN2        | 0 | chr22 | 41595500  |
| 9547    | FZR1            | 0   | 4255    | FZR1           | 0 | chr19 | 3483500   |
| 4314    | PI16            | 0   | 6091    | PI16           | 0 | chr6  | 37034500  |
| 4814    | PI16            | 0   | 5591    | PI16           | 0 | chr6  | 37035000  |
| -859    | HS6ST1          | 0   | 1603404 | LOC389033      | 0 | chr2  | 128793500 |
| 8261    | AMZ2            | 0   | 900     | AMZ2           | 0 | chr17 | 63764000  |
| 21366   | LMF1            | 0   | 95985   | LMF1           | 0 | chr16 | 865000    |
| 666     | FANCG           | 0   | 5513    | FANCG          | 0 | chr9  | 35064500  |
| 1166    | FANCG           | 0   | 5013    | FANCG          | 0 | chr9  | 35065000  |
| -45737  | AGR2            | 0   | 8554    | AGR3           | 0 | chr7  | 16857000  |
| -46237  | AGR2            | 0   | 8054    | AGR3           | 0 | chr7  | 16857500  |
| -304558 | POTEG           | 0   | 94453   | POTEM          | 0 | chr14 | 18959500  |
| 3956    | RECQL5          | 0   | 36360   | RECQL5         | 0 | chr17 | 71138500  |
| -195625 | HERC2P4         | 0   | 325341  | TP53TG3B       | 0 | chr16 | 32267000  |
| -196125 | HERC2P4         | 0   | 324841  | TP53TG3B       | 0 | chr16 | 32267500  |
| 11618   | NDUFS7          | 0   | 88      | NDUFS7         | 0 | chr19 | 1346500   |
| -123432 | RDH10           | 0   | 100894  | STAU2          | 0 | chr8  | 74523500  |
| -975    | TAP2            | 0   | 971     | PSMB8          | 0 | chr6  | 32915500  |
| -755    | C3orf17         | 0   | 192064  | BOC            | 0 | chr3  | 114222000 |
| 4268    | SEMA5B          | 0   | 114266  | SEMA5B         | 0 | chr3  | 124115000 |
| -68540  | 4F16,OR4F29,OR  | 0   | 183958  | 6,OR4F29,OR4F3 | 0 | chr1  | 427000    |
| 7379    | OGFR            | 0   | 1797    | OGFR           | 0 | chr20 | 60914000  |
| -1348   | SNORA47         | 0   | 4878    | LOC728723      | 0 | chr5  | 76413500  |
| -37561  | NOC4L           | 0   | 6369    | GALNT9         | 0 | chr12 | 131240500 |
| -38061  | NOC4L           | 0   | 5869    | GALNT9         | 0 | chr12 | 131241000 |
| 2129    | RFPL3           | 0   | 4148    | RFPL3          | 0 | chr22 | 31083000  |
| 996     | STMN3           | 0   | 12724   | STMN3          | 0 | chr20 | 61742500  |
| -38679  | S3,LIMS3-LOC44C | 0   | 2555    | LOC440895      | 0 | chr2  | 110060000 |
| -39179  | S3,LIMS3-LOC44C | 0   | 2055    | LOC440895      | 0 | chr2  | 110060500 |
| -24936  | LOC150381       | 0   | 2540    | LOC400931      | 0 | chr22 | 44858000  |
| -25436  | LOC150381       | 0   | 2040    | LOC400931      | 0 | chr22 | 44858500  |
| -25936  | LOC150381       | 0   | 1540    | LOC400931      | 0 | chr22 | 44859000  |
| -26436  | LOC150381       | 0   | 1040    | LOC400931      | 0 | chr22 | 44859500  |
| -26936  | LOC150381       | 0   | 540     | LOC400931      | 0 | chr22 | 44860000  |
| 3653    | C1orf86         | 0   | 1574    | C1orf86        | 0 | chr1  | 2114500   |
| 4153    | C1orf86         | 0   | 1074    | C1orf86        | 0 | chr1  | 2115000   |
| 4653    | C1orf86         | 0   | 574     | C1orf86        | 0 | chr1  | 2115500   |
| 78599   | WDR52           | 0   | 30      | WDR52          | 0 | chr3  | 114643000 |
| ---     | ---             | --- | 1490    | PLCXD1         | 0 | chrX  | 131500    |
| -53181  | FRA10AC1        | 0   | 2055    | LG11           | 0 | chr10 | 95505500  |

|          |              |   |        |           |   |       |           |
|----------|--------------|---|--------|-----------|---|-------|-----------|
| -5348    | ZNF775       | 0 | 1772   | LOC728743 | 0 | chr7  | 149732000 |
| -22145   | GNB1         | 0 | 1625   | CALML6    | 0 | chr1  | 1834500   |
| -4306    | HPCAL1       | 0 | 8458   | ODC1      | 0 | chr2  | 10489500  |
| -4806    | HPCAL1       | 0 | 7958   | ODC1      | 0 | chr2  | 10490000  |
| 293364   | FMN1         | 0 | 377    | FMN1      | 0 | chr15 | 31147000  |
| -123     | FMN1         | 0 | 242968 | RYR3      | 0 | chr15 | 31147500  |
| -12461   | IRAK1BP1     | 0 | 23355  | PHIP      | 0 | chr6  | 79677500  |
| 315      | NSD1         | 0 | 166820 | NSD1      | 0 | chr5  | 176493000 |
| -397     | NFIC         | 0 | 10404  | C19orf77  | 0 | chr19 | 3415000   |
| -897     | NFIC         | 0 | 9904   | C19orf77  | 0 | chr19 | 3415500   |
| -515     | LMF1         | 0 | 10308  | SOX8      | 0 | chr16 | 961500    |
| 29541    | SNPH         | 0 | 13471  | SNPH      | 0 | chr20 | 1224500   |
| 30041    | SNPH         | 0 | 12971  | SNPH      | 0 | chr20 | 1225000   |
| 51398    | MAST3        | 0 | 2499   | MAST3     | 0 | chr19 | 18121000  |
| 51898    | MAST3        | 0 | 1999   | MAST3     | 0 | chr19 | 18121500  |
| 10378    | PRAME        | 0 | 1196   | PRAME     | 0 | chr22 | 21230500  |
| -60891   | CBFA2T3      | 0 | 91754  | ACSF3     | 0 | chr16 | 87596000  |
| -61391   | CBFA2T3      | 0 | 91254  | ACSF3     | 0 | chr16 | 87596500  |
| 7412     | FAM71E2      | 0 | 932    | FAM71E2   | 0 | chr19 | 60565500  |
| 145      | HSPA12B      | 0 | 20258  | HSPA12B   | 0 | chr20 | 3661500   |
| 394      | ADAMTSL2     | 0 | 42961  | ADAMTSL2  | 0 | chr9  | 135387500 |
| 119774   | MBP          | 0 | 262    | MBP       | 0 | chr18 | 72973500  |
| 10922    | CNN1         | 0 | 638    | CNN1      | 0 | chr19 | 11521500  |
| 29815    | THRA         | 0 | 1146   | THRA      | 0 | chr17 | 35502500  |
| 434      | NR1D1        | 0 | 7499   | NR1D1     | 0 | chr17 | 35503000  |
| 3563     | PVR          | 0 | 18766  | PVR       | 0 | chr19 | 49842500  |
| -39586   | N4BP2        | 0 | 1921   | RHOH      | 0 | chr4  | 39873000  |
| -299131  | LOC100133612 | 0 | 250970 | LOC284661 | 0 | chr1  | 4121000   |
| -299631  | LOC100133612 | 0 | 250470 | LOC284661 | 0 | chr1  | 4121500   |
| 302      | DSCAML1      | 0 | 369186 | DSCAML1   | 0 | chr11 | 116804000 |
| 802      | DSCAML1      | 0 | 368686 | DSCAML1   | 0 | chr11 | 116804500 |
| 35687    | NFATC1       | 0 | 93311  | NFATC1    | 0 | chr18 | 75297000  |
| 36187    | NFATC1       | 0 | 92811  | NFATC1    | 0 | chr18 | 75297500  |
| -174385  | FAM92B       | 0 | 324529 | KIAA0182  | 0 | chr16 | 83878000  |
| -174885  | FAM92B       | 0 | 324029 | KIAA0182  | 0 | chr16 | 83878500  |
| -4868    | LMX1B        | 0 | 99105  | ZBTB43    | 0 | chr9  | 128508000 |
| 11917    | DAZAP1       | 0 | 16182  | DAZAP1    | 0 | chr19 | 1370500   |
| 12417    | DAZAP1       | 0 | 15682  | DAZAP1    | 0 | chr19 | 1371000   |
| -158150  | PDE4B        | 0 | 1412   | SGIP1     | 0 | chr1  | 66771000  |
| -12046   | DLGAP4       | 0 | 810    | MYL9      | 0 | chr20 | 34602500  |
| -12546   | DLGAP4       | 0 | 310    | MYL9      | 0 | chr20 | 34603000  |
| -25956   | INTS1        | 0 | 393    | MAFK      | 0 | chr7  | 1536500   |
| 107      | MAFK         | 0 | 12205  | MAFK      | 0 | chr7  | 1537000   |
| 63883    | NSL1         | 0 | 1762   | NSL1      | 0 | chr1  | 211030000 |
| 64383    | NSL1         | 0 | 1262   | NSL1      | 0 | chr1  | 211030500 |
| -55106   | SIX3         | 0 | 4828   | SIX2      | 0 | chr2  | 45081000  |
| 3851     | KIRREL2      | 0 | 6388   | KIRREL2   | 0 | chr19 | 41043500  |
| -3985502 | LRRTM1       | 0 | 816    | FUNDC2P2  | 0 | chr2  | 84370500  |
| 17284    | GET4         | 0 | 2597   | GET4      | 0 | chr7  | 900000    |
| 351281   | RPTOR        | 0 | 70268  | RPTOR     | 0 | chr17 | 76484500  |
| 351781   | RPTOR        | 0 | 69768  | RPTOR     | 0 | chr17 | 76485000  |
| 6883     | MFSD7        | 0 | 473    | MFSD7     | 0 | chr4  | 672500    |
| 80271    | FBRSL1       | 0 | 14344  | FBRSL1    | 0 | chr12 | 131657500 |
| 80771    | FBRSL1       | 0 | 13844  | FBRSL1    | 0 | chr12 | 131658000 |
| 22860    | RGMA         | 0 | 22937  | RGMA      | 0 | chr15 | 91410500  |
| -76328   | SV2C         | 0 | 1404   | IQGAP2    | 0 | chr5  | 75733500  |
| 39389    | ENG          | 0 | 368    | ENG       | 0 | chr9  | 129656500 |
| -132     | ENG          | 0 | 11579  | AK1       | 0 | chr9  | 129657000 |

|         |           |   |          |           |   |       |           |
|---------|-----------|---|----------|-----------|---|-------|-----------|
| -437    | HSPBP1    | 0 | 3345     | BRSK1     | 0 | chr19 | 60484000  |
| 9093    | NR2E1     | 0 | 13704    | NR2E1     | 0 | chr6  | 108603000 |
| 4573    | LOC678655 | 0 | 7944     | LOC678655 | 0 | chr12 | 6423000   |
| 28605   | STAB1     | 0 | 551      | STAB1     | 0 | chr3  | 52533000  |
| 76      | NT5DC2    | 0 | 10633    | NT5DC2    | 0 | chr3  | 52533500  |
| 576     | NT5DC2    | 0 | 10133    | NT5DC2    | 0 | chr3  | 52534000  |
| 6440    | ZNF280A   | 0 | 113      | ZNF280A   | 0 | chr22 | 21204500  |
| 15920   | CNGB1     | 0 | 521      | CNGB1     | 0 | chr16 | 56562000  |
| 28361   | WDR86     | 0 | 557      | WDR86     | 0 | chr7  | 150737500 |
| -41456  | ZSWIM4    | 0 | 3449     | NANOS3    | 0 | chr19 | 13845500  |
| -41956  | ZSWIM4    | 0 | 2949     | NANOS3    | 0 | chr19 | 13846000  |
| -36228  | MSMP      | 0 | 1905     | NPR2      | 0 | chr9  | 35780500  |
| -36728  | MSMP      | 0 | 1405     | NPR2      | 0 | chr9  | 35781000  |
| 16031   | PPP2R3B   | 0 | 36627    | PPP2R3B   | 0 | chrX  | 231000    |
| 16531   | PPP2R3B   | 0 | 36127    | PPP2R3B   | 0 | chrX  | 231500    |
| -12082  | GPIHBP1   | 0 | 17983    | ZFP41     | 0 | chr8  | 144382500 |
| -12582  | GPIHBP1   | 0 | 17483    | ZFP41     | 0 | chr8  | 144383000 |
| 8167    | SLC9A3    | 0 | 43049    | SLC9A3    | 0 | chr5  | 534500    |
| 8667    | SLC9A3    | 0 | 42549    | SLC9A3    | 0 | chr5  | 535000    |
| -1177   | SCRT2     | 0 | 82723    | C20orf54  | 0 | chr20 | 606000    |
| -1677   | SCRT2     | 0 | 82223    | C20orf54  | 0 | chr20 | 606500    |
| -89674  | LOC728875 | 0 | 378      | C1orf152  | 0 | chr1  | 143323000 |
| 122     | C1orf152  | 0 | 584      | C1orf152  | 0 | chr1  | 143323500 |
| 35235   | RADIL     | 0 | 49361    | RADIL     | 0 | chr7  | 4840500   |
| -708    | ZXDA      | 0 | 4529331  | SPIN4     | 0 | chrX  | 57954500  |
| -94532  | LOC146481 | 0 | 10393749 | ANKRD26P1 | 0 | chr16 | 34667000  |
| -63946  | TP53TG3   | 0 | 136797   | SLC6A10P  | 0 | chr16 | 32659500  |
| -64446  | TP53TG3   | 0 | 136297   | SLC6A10P  | 0 | chr16 | 32660000  |
| -533    | TIMELESS  | 0 | 150      | MIP       | 0 | chr12 | 55130000  |
| 350     | MIP       | 0 | 4196     | MIP       | 0 | chr12 | 55130500  |
| 7545    | ADAMTS2   | 0 | 223935   | ADAMTS2   | 0 | chr5  | 178481000 |
| -1518   | NRIP2     | 0 | 21109    | FOXM1     | 0 | chr12 | 2816000   |
| -1497   | RNF19A    | 0 | 209175   | ANKRD46   | 0 | chr8  | 101393000 |
| 12742   | C11orf2   | 0 | 2756     | C11orf2   | 0 | chr11 | 64633000  |
| -526    | TNFRSF9   | 0 | 20300    | PARK7     | 0 | chr1  | 7924000   |
| -3138   | PRR25     | 0 | 36634    | LMF1      | 0 | chr16 | 807000    |
| -3638   | PRR25     | 0 | 36134    | LMF1      | 0 | chr16 | 807500    |
| 5418    | C11orf21  | 0 | 219      | C11orf21  | 0 | chr11 | 2279500   |
| 77507   | SKI       | 0 | 4011     | SKI       | 0 | chr1  | 2227500   |
| -1342   | GPATCH1   | 0 | 337      | WDR88     | 0 | chr19 | 38314500  |
| -244077 | ---       | 0 | 99267    | ZNF479    | 0 | chr7  | 57092000  |
| -11184  | ZNF524    | 0 | 6418     | ZNF784    | 0 | chr19 | 60817500  |
| -35391  | CBFA2T3   | 0 | 117254   | ACSF3     | 0 | chr16 | 87570500  |
| 4149    | CHAD      | 0 | 226      | CHAD      | 0 | chr17 | 45901000  |
| -4404   | FAM135A   | 0 | 1345     | C6orf57   | 0 | chr6  | 71332000  |
| 85549   | FAM19A5   | 0 | 184250   | FAM19A5   | 0 | chr22 | 47349500  |
| 31082   | APIP      | 0 | 3015     | APIP      | 0 | chr11 | 34891500  |
| 31582   | APIP      | 0 | 2515     | APIP      | 0 | chr11 | 34892000  |
| 1835    | SH2B2     | 0 | 31898    | SH2B2     | 0 | chr7  | 101717000 |
| -33861  | CHRNA4    | 0 | 10985    | KCNQ2     | 0 | chr20 | 61497000  |
| 2828    | NOTUM     | 0 | 5847     | NOTUM     | 0 | chr17 | 77506500  |
| 12531   | PPP2R3B   | 0 | 40127    | PPP2R3B   | 0 | chrY  | 227500    |
| 34716   | TBX5      | 0 | 3086     | TBX5      | 0 | chr12 | 113323000 |
| -1179   | CSH2      | 0 | 5303     | GH2       | 0 | chr17 | 59306000  |
| 14748   | GPSM1     | 0 | 17378    | GPSM1     | 0 | chr9  | 138356500 |
| 15248   | GPSM1     | 0 | 16878    | GPSM1     | 0 | chr9  | 138357000 |
| 141587  | NCOR2     | 0 | 69602    | NCOR2     | 0 | chr12 | 123516500 |
| 142087  | NCOR2     | 0 | 69102    | NCOR2     | 0 | chr12 | 123517000 |

|          |              |   |         |           |   |       |           |
|----------|--------------|---|---------|-----------|---|-------|-----------|
| 3246     | C21orf2      | 0 | 7213    | C21orf2   | 0 | chr21 | 44576500  |
| 3746     | C21orf2      | 0 | 6713    | C21orf2   | 0 | chr21 | 44577000  |
| 57485    | LAMA5        | 0 | 763     | LAMA5     | 0 | chr20 | 60375000  |
| 57985    | LAMA5        | 0 | 263     | LAMA5     | 0 | chr20 | 60375500  |
| 15917    | NFIX         | 0 | 87110   | NFIX      | 0 | chr19 | 12983500  |
| 16417    | NFIX         | 0 | 86610   | NFIX      | 0 | chr19 | 12984000  |
| 5915     | KLHL35       | 0 | 1881    | KLHL35    | 0 | chr11 | 74817000  |
| -3837    | TAF1C        | 0 | 223     | ADAD2     | 0 | chr16 | 82782000  |
| -28609   | COL6A1       | 0 | 64460   | COL6A2    | 0 | chr21 | 46278000  |
| -29109   | COL6A1       | 0 | 63960   | COL6A2    | 0 | chr21 | 46278500  |
| -90247   | TIAF1        | 0 | 81000   | CRYBA1    | 0 | chr17 | 24517000  |
| -5833    | ESPNL        | 0 | 1655    | KLHL30    | 0 | chr2  | 238712500 |
| 112      | RAVER1       | 0 | 17314   | RAVER1    | 0 | chr19 | 10288000  |
| 612      | RAVER1       | 0 | 16814   | RAVER1    | 0 | chr19 | 10288500  |
| 1450     | C9orf173     | 0 | 755     | C9orf173  | 0 | chr9  | 139267000 |
| 4062     | INTS1        | 0 | 30044   | INTS1     | 0 | chr7  | 1480500   |
| 5062     | INTS1        | 0 | 29044   | INTS1     | 0 | chr7  | 1481500   |
| 6062     | INTS1        | 0 | 28044   | INTS1     | 0 | chr7  | 1482500   |
| -1363429 | TTY23B,TTY23 | 0 | 1560691 | TTY15     | 0 | chrY  | 11723000  |
| -1363929 | TTY23B,TTY23 | 0 | 1560191 | TTY15     | 0 | chrY  | 11723500  |
| 52281    | ZDHHC11      | 0 | 3101    | ZDHHC11   | 0 | chr5  | 901000    |
| 5997     | C2orf27B     | 0 | 704     | C2orf27B  | 0 | chr2  | 132275000 |
| 6497     | C2orf27B     | 0 | 204     | C2orf27B  | 0 | chr2  | 132275500 |
| 187716   | SLIT1        | 0 | 173     | SLIT1     | 0 | chr10 | 98935500  |
| 1392     | SQSTM1       | 0 | 29681   | SQSTM1    | 0 | chr5  | 179168000 |
| -2396    | SNORD88A     | 0 | 393     | SNORD88C  | 0 | chr19 | 55997000  |
| -14855   | PSCA         | 0 | 2532    | LY6K      | 0 | chr8  | 143776000 |
| -15355   | PSCA         | 0 | 2032    | LY6K      | 0 | chr8  | 143776500 |
| 56936    | GAK          | 0 | 26174   | GAK       | 0 | chr4  | 890000    |
| 76142    | KCNT1        | 0 | 14813   | KCNT1     | 0 | chr9  | 137810000 |
| 76642    | KCNT1        | 0 | 14313   | KCNT1     | 0 | chr9  | 137810500 |
| -1989    | INSR         | 0 | 118998  | ARHGEF18  | 0 | chr19 | 7247000   |
| 297      | OTUD1        | 0 | 2814    | OTUD1     | 0 | chr10 | 23768500  |
| -1965    | DDX12        | 0 | 145136  | KLRB1     | 0 | chr12 | 9494000   |
| -139892  | C10orf108    | 0 | 4483    | LARP4B    | 0 | chr10 | 841000    |
| -140392  | C10orf108    | 0 | 3983    | LARP4B    | 0 | chr10 | 841500    |
| 23969    | ASMTL        | 0 | 25844   | ASMTL     | 0 | chrX  | 1506000   |
| 24969    | ASMTL        | 0 | 24844   | ASMTL     | 0 | chrX  | 1507000   |
| 23647    | STEAP3       | 0 | 18197   | STEAP3    | 0 | chr2  | 119721500 |
| 24147    | STEAP3       | 0 | 17697   | STEAP3    | 0 | chr2  | 119722000 |
| 99       | MAGEA9       | 0 | 5706    | MAGEA9    | 0 | chrX  | 148671500 |
| 26789    | PKD1         | 0 | 20400   | PKD1      | 0 | chr16 | 2105500   |
| 7579     | C21orf33     | 0 | 4533    | C21orf33  | 0 | chr21 | 44385500  |
| -169946  | TP53TG3      | 0 | 30797   | SLC6A10P  | 0 | chr16 | 32765500  |
| -25258   | CHST12       | 0 | 60004   | LFNG      | 0 | chr7  | 2466000   |
| -1219    | ACBD7        | 0 | 5389    | C10orf111 | 0 | chr10 | 15172000  |
| -101264  | TANK         | 0 | 2031    | PSMD14    | 0 | chr2  | 161871000 |
| -192620  | GGT8P        | 0 | 3263899 | ANKRD20B  | 0 | chr2  | 91526500  |
| -1968    | TP53AIP1     | 0 | 20165   | ARHGAP32  | 0 | chr11 | 128320000 |
| -130599  | ITSN2        | 0 | 93349   | NCOA1     | 0 | chr2  | 24567500  |
| 608      | HCN2         | 0 | 26659   | HCN2      | 0 | chr19 | 541500    |
| 1108     | HCN2         | 0 | 26159   | HCN2      | 0 | chr19 | 542000    |
| -681     | BOLL         | 0 | 18777   | PLCL1     | 0 | chr2  | 198359000 |
| 11966    | PLXNB2       | 0 | 7836    | PLXNB2    | 0 | chr22 | 49067500  |
| -837     | CD70         | 0 | 72565   | TNFSF14   | 0 | chr19 | 6543000   |
| -1337    | CD70         | 0 | 72065   | TNFSF14   | 0 | chr19 | 6543500   |
| 2943     | RHBDF1       | 0 | 11629   | RHBDF1    | 0 | chr16 | 51000     |
| -33209   | UBTFL2       | 0 | 10470   | TRIM49    | 0 | chr11 | 89160000  |

|          |                 |   |        |                 |   |       |           |
|----------|-----------------|---|--------|-----------------|---|-------|-----------|
| -33709   | UBTFL2          | 0 | 9970   | TRIM49          | 0 | chr11 | 89160500  |
| 605      | SLC25A34        | 0 | 4471   | SLC25A34        | 0 | chr1  | 15936000  |
| 200      | TNFRSF25        | 0 | 4842   | TNFRSF25        | 0 | chr1  | 6444000   |
| 8361     | TNFSF12-TNFSF13 | 0 | 4149   | TNFSF12-TNFSF13 | 0 | chr17 | 7401500   |
| 9610     | CCDC154         | 0 | 491    | CCDC154         | 0 | chr16 | 1434000   |
| -9       | CCDC154         | 0 | 435    | CLCN7           | 0 | chr16 | 1434500   |
| 5435     | TNFSF14         | 0 | 599    | TNFSF14         | 0 | chr19 | 6621000   |
| 610      | LOC100240735    | 0 | 2374   | LOC100240735    | 0 | chr12 | 52759500  |
| -52248   | RCAN1           | 0 | 2057   | CLIC6           | 0 | chr21 | 34961500  |
| 733      | C9orf163        | 0 | 1840   | C9orf163        | 0 | chr9  | 138498500 |
| -145     | DVL1            | 0 | 3433   | MXRA8           | 0 | chr1  | 1274500   |
| 32096    | POLD1           | 0 | 1583   | POLD1           | 0 | chr19 | 55611500  |
| 33596    | POLD1           | 0 | 83     | POLD1           | 0 | chr19 | 55613000  |
| -417     | POLD1           | 0 | 506    | SPIB            | 0 | chr19 | 55613500  |
| -979     | SYT10           | 0 | 581482 | ALG10           | 0 | chr12 | 33485000  |
| -30218   | FCGR3B          | 0 | 1563   | FCGR2B          | 0 | chr1  | 159898000 |
| -30718   | FCGR3B          | 0 | 1063   | FCGR2B          | 0 | chr1  | 159898500 |
| 5917     | NFIX            | 0 | 97110  | NFIX            | 0 | chr19 | 12973500  |
| -1029    | RNF41           | 0 | 1391   | OBFC2B          | 0 | chr12 | 54903000  |
| 49770    | MTA1            | 0 | 1102   | MTA1            | 0 | chr14 | 105007000 |
| 50270    | MTA1            | 0 | 602    | MTA1            | 0 | chr14 | 105007500 |
| -62276   | BTF3L1          | 0 | 559    | CLN5            | 0 | chr13 | 76463500  |
| -43313   | CNRIP1          | 0 | 1825   | PLEK            | 0 | chr2  | 68444000  |
| -1985    | LOC100128675    | 0 | 7571   | FXYD3           | 0 | chr19 | 40291000  |
| -2770497 | ALG10           | 0 | 153823 | ALG10B          | 0 | chr12 | 36843000  |
| -2770997 | ALG10           | 0 | 153323 | ALG10B          | 0 | chr12 | 36843500  |
| -14600   | DTYMK           | 0 | 628    | ING5            | 0 | chr2  | 242289500 |
| -15100   | DTYMK           | 0 | 128    | ING5            | 0 | chr2  | 242290000 |
| -152526  | ZNF599          | 0 | 1146   | ZNF30           | 0 | chr19 | 40108500  |
| -27085   | ETS1            | 0 | 144522 | FLI1            | 0 | chr11 | 127924500 |
| -17117   | GUCY2D          | 0 | 1582   | ALOX15B         | 0 | chr17 | 7881500   |
| -250266  | MIMT1           | 0 | 21320  | USP29           | 0 | chr19 | 62302000  |
| -250766  | MIMT1           | 0 | 20820  | USP29           | 0 | chr19 | 62302500  |
| 58       | GPIHBP1         | 0 | 3918   | GPIHBP1         | 0 | chr8  | 144366500 |
| -1190    | OTUD7B          | 0 | 55465  | VPS45           | 0 | chr1  | 148250500 |
| -1690    | OTUD7B          | 0 | 54965  | VPS45           | 0 | chr1  | 148251000 |
| -1110    | SRXN1           | 0 | 7240   | SCRT2           | 0 | chr20 | 583000    |
| -1610    | SRXN1           | 0 | 6740   | SCRT2           | 0 | chr20 | 583500    |
| -200     | SLC37A4         | 0 | 13105  | HYOU1           | 0 | chr11 | 118407000 |
| -1200    | SLC37A4         | 0 | 12105  | HYOU1           | 0 | chr11 | 118408000 |
| 576      | SLC7A5P1        | 0 | 39     | SLC7A5P1        | 0 | chr16 | 29532500  |
| -461     | SLC7A5P1        | 0 | 48800  | SPN             | 0 | chr16 | 29533000  |
| -180225  | JAK1            | 0 | 819    | AK4             | 0 | chr1  | 65385000  |
| 1157     | GRHL2           | 0 | 176128 | GRHL2           | 0 | chr8  | 102575000 |
| -151478  | LRPAP1          | 0 | 82593  | ADRA2C          | 0 | chr4  | 3655500   |
| -54949   | LOC400657       | 0 | 906    | ZNF407          | 0 | chr18 | 70471000  |
| -55449   | LOC400657       | 0 | 406    | ZNF407          | 0 | chr18 | 70471500  |
| -457612  | TBC1D22A        | 0 | 857951 | FAM19A5         | 0 | chr22 | 46406000  |
| 112014   | CLTCL1          | 0 | 239    | CLTCL1          | 0 | chr22 | 17659000  |
| -2320    | RPL3L           | 0 | 2517   | NDUFB10         | 0 | chr16 | 1947000   |
| -2820    | RPL3L           | 0 | 2017   | NDUFB10         | 0 | chr16 | 1947500   |
| 1710     | LCN6            | 0 | 2801   | LCN6            | 0 | chr9  | 138760000 |
| 2210     | LCN6            | 0 | 2301   | LCN6            | 0 | chr9  | 138760500 |
| -41307   | FABP1           | 0 | 949    | THNSL2          | 0 | chr2  | 88250000  |
| 5561     | SLC5A2          | 0 | 2092   | SLC5A2          | 0 | chr16 | 31407500  |
| 6061     | SLC5A2          | 0 | 1592   | SLC5A2          | 0 | chr16 | 31408000  |
| -1047    | DPEP3           | 0 | 5795   | DPEP2           | 0 | chr16 | 66573000  |
| -1547    | DPEP3           | 0 | 5295   | DPEP2           | 0 | chr16 | 66573500  |



|          |           |     |          |           |   |       |           |
|----------|-----------|-----|----------|-----------|---|-------|-----------|
| -852     | NANP      | 0   | 49350    | ZNF337    | 0 | chr20 | 25553500  |
| -31172   | CCDC129   | 0   | 2323     | C7orf16   | 0 | chr7  | 31691000  |
| 11710    | AGR2      | 0   | 763      | AGR2      | 0 | chr7  | 16810500  |
| 2880     | SDCBP2    | 0   | 16338    | SDCBP2    | 0 | chr20 | 1241500   |
| -220044  | FAM86DP   | 0   | 9176     | FRG2C     | 0 | chr3  | 75787000  |
| -220544  | FAM86DP   | 0   | 8676     | FRG2C     | 0 | chr3  | 75787500  |
| 5436     | TBL3      | 0   | 1252     | TBL3      | 0 | chr16 | 1967500   |
| 402      | ACRC      | 0   | 35158    | ACRC      | 0 | chrX  | 70715000  |
| 12033    | KANK3     | 0   | 8646     | KANK3     | 0 | chr19 | 8305500   |
| 12533    | KANK3     | 0   | 8146     | KANK3     | 0 | chr19 | 8306000   |
| -293     | GLT6D1    | 0   | 23488    | LCN9      | 0 | chr9  | 137671500 |
| -20725   | CNR1      | 0   | 444207   | RNGTT     | 0 | chr6  | 88932500  |
| -21225   | CNR1      | 0   | 443707   | RNGTT     | 0 | chr6  | 88933000  |
| 23307    | GYS1      | 0   | 1861     | GYS1      | 0 | chr19 | 54186500  |
| -701     | SLC12A8   | 0   | 12202    | ZNF148    | 0 | chr3  | 126415000 |
| -3183914 | LOC399744 | 0   | 182319   | LOC441666 | 0 | chr10 | 41965000  |
| 3173     | SMARCA4   | 0   | 74958    | SMARCA4   | 0 | chr19 | 10959000  |
| 3673     | SMARCA4   | 0   | 74458    | SMARCA4   | 0 | chr19 | 10959500  |
| 658      | PHF13     | 0   | 9680     | PHF13     | 0 | chr1  | 6597000   |
| 58973    | EMILIN2   | 0   | 8090     | EMILIN2   | 0 | chr18 | 2896000   |
| 59473    | EMILIN2   | 0   | 7590     | EMILIN2   | 0 | chr18 | 2896500   |
| 2606     | IGSF9B    | 0   | 39090    | IGSF9B    | 0 | chr11 | 133293000 |
| 3106     | IGSF9B    | 0   | 38590    | IGSF9B    | 0 | chr11 | 133293500 |
| 3606     | IGSF9B    | 0   | 38090    | IGSF9B    | 0 | chr11 | 133294000 |
| 4106     | IGSF9B    | 0   | 37590    | IGSF9B    | 0 | chr11 | 133294500 |
| -32      | OTUB1     | 0   | 106      | MACROD1   | 0 | chr11 | 63522500  |
| 394      | MACROD1   | 0   | 167161   | MACROD1   | 0 | chr11 | 63523000  |
| 894      | MACROD1   | 0   | 166661   | MACROD1   | 0 | chr11 | 63523500  |
| -616274  | ERICH1    | 0   | 149475   | DLGAP2    | 0 | chr8  | 1287500   |
| -71018   | SLC14A1   | 0   | 2042     | SIGLEC15  | 0 | chr18 | 41657500  |
| -93608   | ALOX12P2  | 0   | 2107     | ALOX12    | 0 | chr17 | 6838000   |
| 46281    | CASR      | 0   | 56534    | CASR      | 0 | chr3  | 123431500 |
| 46781    | CASR      | 0   | 56034    | CASR      | 0 | chr3  | 123432000 |
| 3035     | PCDHGB7   | 0   | 92230    | PCDHGB7   | 0 | chr5  | 140780500 |
| 3959     | C16orf7   | 0   | 9895     | C16orf7   | 0 | chr16 | 88305000  |
| -67623   | PPP6R3    | 0   | 1558     | GAL       | 0 | chr11 | 68207000  |
| -1322    | AOAH      | 0   | 128485   | ELMO1     | 0 | chr7  | 36732000  |
| 563      | C12orf52  | 0   | 6002     | C12orf52  | 0 | chr12 | 112108500 |
| 16838    | RFX4      | 0   | 162711   | RFX4      | 0 | chr12 | 105518000 |
| -46401   | C1orf159  | 0   | 11148    | TTL10     | 0 | chr1  | 1088000   |
| 13106    | CELSR1    | 0   | 163231   | CELSR1    | 0 | chr22 | 45148500  |
| 14106    | CELSR1    | 0   | 162231   | CELSR1    | 0 | chr22 | 45149500  |
| -153     | NOTUM     | 0   | 16214    | ASPCR1    | 0 | chr17 | 77512500  |
| -137231  | SCFD1     | 0   | 1491     | COCH      | 0 | chr14 | 30412000  |
| ---      | ---       | --- | 18414187 | GOLGA8C   | 0 | chr15 | 613500    |
| ---      | ---       | --- | 18413687 | GOLGA8C   | 0 | chr15 | 614000    |
| 7180     | RNF213    | 0   | 49173    | RNF213    | 0 | chr17 | 75935500  |
| 1822     | AVPR2     | 0   | 2813     | AVPR2     | 0 | chrX  | 152823000 |
| 2322     | AVPR2     | 0   | 2313     | AVPR2     | 0 | chrX  | 152823500 |
| 912      | TAS1R3    | 0   | 2207     | TAS1R3    | 0 | chr1  | 1257500   |
| 1412     | TAS1R3    | 0   | 1707     | TAS1R3    | 0 | chr1  | 1258000   |
| 1912     | TAS1R3    | 0   | 1207     | TAS1R3    | 0 | chr1  | 1258500   |
| 18810    | AATK      | 0   | 29967    | AATK      | 0 | chr17 | 76724500  |
| -1391    | RPL8      | 0   | 5064     | ZNF517    | 0 | chr8  | 145990000 |
| -15586   | ITGB1BP3  | 0   | 451      | DAPK3     | 0 | chr19 | 3909000   |
| 49       | DAPK3     | 0   | 11326    | DAPK3     | 0 | chr19 | 3909500   |
| 5033     | GFRA3     | 0   | 17152    | GFRA3     | 0 | chr5  | 137621000 |
| 5533     | GFRA3     | 0   | 16652    | GFRA3     | 0 | chr5  | 137621500 |

|          |           |   |        |           |   |       |           |
|----------|-----------|---|--------|-----------|---|-------|-----------|
| -20887   | TNFRSF14  | 0 | 608    | C1orf93   | 0 | chr1  | 2507500   |
| -21387   | TNFRSF14  | 0 | 108    | C1orf93   | 0 | chr1  | 2508000   |
| -877261  | XYLT1     | 0 | 9955   | PKD1P1    | 0 | chr16 | 18349500  |
| -877761  | XYLT1     | 0 | 9455   | PKD1P1    | 0 | chr16 | 18350000  |
| -31109   | COL6A1    | 0 | 61960  | COL6A2    | 0 | chr21 | 46280500  |
| -31609   | COL6A1    | 0 | 61460  | COL6A2    | 0 | chr21 | 46281000  |
| 299      | AVP       | 0 | 1870   | AVP       | 0 | chr20 | 3011500   |
| -427     | NDUFA13   | 0 | 219    | YJEFN3    | 0 | chr19 | 19500500  |
| -138606  | RELL1     | 0 | 1676   | PGM2      | 0 | chr4  | 37503000  |
| -2507    | FOXQ1     | 0 | 72567  | FOXF2     | 0 | chr6  | 1262500   |
| 5450     | CALHM3    | 0 | 987    | CALHM3    | 0 | chr10 | 105228000 |
| 5950     | CALHM3    | 0 | 487    | CALHM3    | 0 | chr10 | 105228500 |
| 3258     | SLC17A6   | 0 | 38120  | SLC17A6   | 0 | chr11 | 22319500  |
| 3758     | SLC17A6   | 0 | 37620  | SLC17A6   | 0 | chr11 | 22320000  |
| 636      | CCDC36    | 0 | 59041  | CCDC36    | 0 | chr3  | 49211500  |
| 64       | CCDC36    | 0 | 58541  | CCDC36    | 0 | chr3  | 49212000  |
| -7765    | PRR14     | 0 | 278    | FBRS      | 0 | chr16 | 30583000  |
| 222      | FBRS      | 0 | 6132   | FBRS      | 0 | chr16 | 30583500  |
| 2474     | TGFB111   | 0 | 2281   | TGFB111   | 0 | chr16 | 31394500  |
| 2974     | TGFB111   | 0 | 1781   | TGFB111   | 0 | chr16 | 31395000  |
| -1153    | TGM5      | 0 | 8270   | TGM7      | 0 | chr15 | 41347500  |
| -1718491 | COBL      | 0 | 342    | POM121L12 | 0 | chr7  | 53070500  |
| 158      | POM121L12 | 0 | 1112   | POM121L12 | 0 | chr7  | 53071000  |
| 5331     | C11orf45  | 0 | 802    | C11orf45  | 0 | chr11 | 128280000 |
| 9193     | PRMT1     | 0 | 2016   | PRMT1     | 0 | chr19 | 54881500  |
| -85805   | RNF38     | 0 | 85904  | MELK      | 0 | chr9  | 36477000  |
| -86305   | RNF38     | 0 | 85404  | MELK      | 0 | chr9  | 36477500  |
| -12710   | TRIM53    | 0 | 47726  | TRIM49L   | 0 | chr11 | 89236500  |
| -13210   | TRIM53    | 0 | 47226  | TRIM49L   | 0 | chr11 | 89237000  |
| -13710   | TRIM53    | 0 | 46726  | TRIM49L   | 0 | chr11 | 89237500  |
| -14210   | TRIM53    | 0 | 46226  | TRIM49L   | 0 | chr11 | 89238000  |
| 2799     | AIRE      | 0 | 5038   | AIRE      | 0 | chr21 | 44537500  |
| 3299     | AIRE      | 0 | 4538   | AIRE      | 0 | chr21 | 44538000  |
| 10255    | ZSCAN1    | 0 | 10311  | ZSCAN1    | 0 | chr19 | 63247500  |
| 28174    | MGRN1     | 0 | 37975  | MGRN1     | 0 | chr16 | 4643000   |
| -7720    | MS4A15    | 0 | 896    | MS4A10    | 0 | chr11 | 60308500  |
| 33216    | SRCIN1    | 0 | 42709  | SRCIN1    | 0 | chr17 | 33973000  |
| -2610147 | PABPC4L   | 0 | 707021 | PCDH18    | 0 | chr4  | 137952500 |
| 68886    | TBC1D1    | 0 | 179189 | TBC1D1    | 0 | chr4  | 37638000  |
| 50       | PTTG2     | 0 | 526    | PTTG2     | 0 | chr4  | 37638500  |
| 114621   | SMOC2     | 0 | 111096 | SMOC2     | 0 | chr6  | 168699500 |
| -4296    | RANBP1    | 0 | 364    | ZDHC8     | 0 | chr22 | 18499000  |
| 5370     | C14orf80  | 0 | 2629   | C14orf80  | 0 | chr14 | 105034000 |
| -230     | KLK8      | 0 | 580    | KLK9      | 0 | chr19 | 56197000  |
| 5549     | DAPK3     | 0 | 5826   | DAPK3     | 0 | chr19 | 3915000   |
| 6049     | DAPK3     | 0 | 5326   | DAPK3     | 0 | chr19 | 3915500   |
| 6549     | DAPK3     | 0 | 4826   | DAPK3     | 0 | chr19 | 3916000   |
| -1700    | ST5       | 0 | 98776  | C11orf17  | 0 | chr11 | 8790500   |
| 94878    | ZFYVE28   | 0 | 54167  | ZFYVE28   | 0 | chr4  | 2336000   |
| -150381  | CEBPB     | 0 | 167297 | PTPN1     | 0 | chr20 | 48393000  |
| -150881  | CEBPB     | 0 | 166797 | PTPN1     | 0 | chr20 | 48393500  |
| -151381  | CEBPB     | 0 | 166297 | PTPN1     | 0 | chr20 | 48394000  |
| 48140    | SIM2      | 0 | 2380   | SIM2      | 0 | chr21 | 37042000  |
| 971      | RIC8A     | 0 | 5610   | RIC8A     | 0 | chr11 | 199500    |
| 4453     | C19orf63  | 0 | 2420   | C19orf63  | 0 | chr19 | 55676000  |
| 123964   | EBF3      | 0 | 4581   | EBF3      | 0 | chr10 | 131647500 |
| 12207    | SLC12A9   | 0 | 2070   | SLC12A9   | 0 | chr7  | 100300500 |
| 12707    | SLC12A9   | 0 | 1570   | SLC12A9   | 0 | chr7  | 100301000 |

|         |           |   |         |           |   |       |           |
|---------|-----------|---|---------|-----------|---|-------|-----------|
| 13207   | SLC12A9   | 0 | 1070    | SLC12A9   | 0 | chr7  | 100301500 |
| 13707   | SLC12A9   | 0 | 570     | SLC12A9   | 0 | chr7  | 100302000 |
| -941271 | NOX3      | 0 | 380777  | ARID1B    | 0 | chr6  | 156760000 |
| -20189  | NFATC1    | 0 | 130288  | CTDP1     | 0 | chr18 | 75410500  |
| -20689  | NFATC1    | 0 | 129788  | CTDP1     | 0 | chr18 | 75411000  |
| 58457   | AGPAT3    | 0 | 63903   | AGPAT3    | 0 | chr21 | 44168000  |
| 9064    | GRIN3B    | 0 | 223     | GRIN3B    | 0 | chr19 | 960500    |
| 351     | C19orf6   | 0 | 11141   | C19orf6   | 0 | chr19 | 961000    |
| 851     | C19orf6   | 0 | 10641   | C19orf6   | 0 | chr19 | 961500    |
| 1351    | C19orf6   | 0 | 10141   | C19orf6   | 0 | chr19 | 962000    |
| 1851    | C19orf6   | 0 | 9641    | C19orf6   | 0 | chr19 | 962500    |
| 2351    | C19orf6   | 0 | 9141    | C19orf6   | 0 | chr19 | 963000    |
| -19217  | FAT3      | 0 | 53936   | MTNR1B    | 0 | chr11 | 92288500  |
| -446    | DPPA2     | 0 | 9177    | DPPA4     | 0 | chr3  | 110518500 |
| -282414 | LOC399744 | 0 | 3083819 | LOC441666 | 0 | chr10 | 39063500  |
| 1506    | PRR23A    | 0 | 800     | PRR23A    | 0 | chr3  | 140207000 |
| 2006    | PRR23A    | 0 | 300     | PRR23A    | 0 | chr3  | 140207500 |
| -13678  | FAM154B   | 0 | 131239  | GOLGA6L9  | 0 | chr15 | 80378000  |
| 24151   | CDK18     | 0 | 4040    | CDK18     | 0 | chr1  | 203764500 |
| 24651   | CDK18     | 0 | 3540    | CDK18     | 0 | chr1  | 203765000 |
| -11645  | AGRN      | 0 | 14060   | C1orf159  | 0 | chr1  | 993000    |
| 5279    | C10orf58  | 0 | 19233   | C10orf58  | 0 | chr10 | 82163500  |
| 8449    | SLC45A4   | 0 | 9355    | SLC45A4   | 0 | chr8  | 142298500 |
| 8949    | SLC45A4   | 0 | 8855    | SLC45A4   | 0 | chr8  | 142299000 |
| 8525    | NTN5      | 0 | 3076    | NTN5      | 0 | chr19 | 53865000  |
| 9025    | NTN5      | 0 | 2576    | NTN5      | 0 | chr19 | 53865500  |
| -23457  | FLJ40292  | 0 | 89561   | CACNA1B   | 0 | chr9  | 139802500 |
| -1693   | CGB2      | 0 | 637     | CGB1      | 0 | chr19 | 54230000  |
| -8861   | MPP2      | 0 | 601     | C17orf88  | 0 | chr17 | 39349500  |
| -3649   | PANX2     | 0 | 1986    | TRABD     | 0 | chr22 | 48964500  |
| -85617  | ISG20     | 0 | 62177   | ACAN      | 0 | chr15 | 87085500  |
| -86117  | ISG20     | 0 | 61677   | ACAN      | 0 | chr15 | 87086000  |
| 6748    | GPSM1     | 0 | 25378   | GPSM1     | 0 | chr9  | 138348500 |
| 171880  | OTUD7A    | 0 | 334     | OTUD7A    | 0 | chr15 | 29734500  |
| 22819   | PIP5K1C   | 0 | 47445   | PIP5K1C   | 0 | chr19 | 3604000   |
| 2542    | TEKT4     | 0 | 2795    | TEKT4     | 0 | chr2  | 94903500  |
| 3042    | TEKT4     | 0 | 2295    | TEKT4     | 0 | chr2  | 94904000  |
| 6283    | C12orf53  | 0 | 573     | C12orf53  | 0 | chr12 | 6679500   |
| -31880  | LOC441208 | 0 | 106302  | KBTBD2    | 0 | chr7  | 32768000  |
| -18741  | STXBP2    | 0 | 2471    | RETN      | 0 | chr19 | 7637500   |
| -19241  | STXBP2    | 0 | 1971    | RETN      | 0 | chr19 | 7638000   |
| -33021  | SOX8      | 0 | 44084   | LOC146336 | 0 | chr16 | 1010000   |
| -1321   | KCNJ14    | 0 | 1776    | CYTH2     | 0 | chr19 | 53662500  |
| 989     | FRAT1     | 0 | 1662    | FRAT1     | 0 | chr10 | 99070000  |
| 9733    | CBFA2T3   | 0 | 56609   | CBFA2T3   | 0 | chr16 | 87478500  |
| -732    | C1orf111  | 0 | 1319    | C1orf226  | 0 | chr1  | 160614000 |
| 903     | RIPK4     | 0 | 26818   | RIPK4     | 0 | chr21 | 42033500  |
| 94058   | BCOR      | 0 | 32026   | BCOR      | 0 | chrX  | 39889500  |
| 1295    | IRF2BP1   | 0 | 1216    | IRF2BP1   | 0 | chr19 | 51080000  |
| -122479 | SOX1      | 0 | 182169  | C13orf28  | 0 | chr13 | 111896500 |
| -122979 | SOX1      | 0 | 181669  | C13orf28  | 0 | chr13 | 111897000 |
| 9848    | ZNF672    | 0 | 1337    | ZNF672    | 0 | chr1  | 247109000 |
| -741    | C7orf64   | 0 | 224     | MGC16142  | 0 | chr7  | 92005500  |
| 276     | MGC16142  | 0 | 1013    | MGC16142  | 0 | chr7  | 92006000  |
| 36034   | C21orf81  | 0 | 636     | C21orf81  | 0 | chr21 | 14274000  |
| -1364   | C21orf81  | 0 | 127005  | LIP1      | 0 | chr21 | 14276000  |
| -1877   | DDX11L2   | 0 | 7785    | RPL23AP7  | 0 | chr2  | 114077500 |
| -2404   | CABIN1    | 0 | 443     | SUSD2     | 0 | chr22 | 22907000  |

|         |           |   |        |           |   |       |           |
|---------|-----------|---|--------|-----------|---|-------|-----------|
| -6061   | CYB561    | 0 | 30165  | ACE       | 0 | chr17 | 58878000  |
| 120269  | WDR27     | 0 | 124584 | WDR27     | 0 | chr6  | 169719500 |
| 2347    | TIMP2     | 0 | 70067  | TIMP2     | 0 | chr17 | 74363000  |
| 2847    | TIMP2     | 0 | 69567  | TIMP2     | 0 | chr17 | 74363500  |
| 9723    | GOLGA8B   | 0 | 1014   | GOLGA8B   | 0 | chr15 | 32614500  |
| -431750 | FAM19A5   | 0 | 433793 | C22orf34  | 0 | chr22 | 47965500  |
| 1689    | TPRX1     | 0 | 673    | TPRX1     | 0 | chr19 | 52998000  |
| -18095  | BDP1      | 0 | 1370   | MCCC2     | 0 | chr5  | 70917500  |
| -18595  | BDP1      | 0 | 870    | MCCC2     | 0 | chr5  | 70918000  |
| -3106   | C6orf114  | 0 | 85270  | SIRT5     | 0 | chr6  | 13597500  |
| 70587   | TBC1D16   | 0 | 25242  | TBC1D16   | 0 | chr17 | 75599000  |
| -131    | ELF4      | 0 | 18518  | AIFM1     | 0 | chrX  | 129072500 |
| -30058  | FCGR3A    | 0 | 1252   | FCGR2C    | 0 | chr1  | 159816500 |
| -62429  | ---       | 0 | 115    | NFIC      | 0 | chr19 | 3310500   |
| 426     | MIER2     | 0 | 38791  | MIER2     | 0 | chr19 | 257000    |
| 926     | MIER2     | 0 | 38291  | MIER2     | 0 | chr19 | 257500    |
| -51428  | IPP       | 0 | 1371   | MAST2     | 0 | chr1  | 46040500  |
| -745    | KIAA0101  | 0 | 5572   | TRIP4     | 0 | chr15 | 62461500  |
| -1935   | ZNF295    | 0 | 9681   | C21orf121 | 0 | chr21 | 42305500  |
| -31566  | RNASE2    | 0 | 1804   | METT11D1  | 0 | chr14 | 20526000  |
| -32066  | RNASE2    | 0 | 1304   | METT11D1  | 0 | chr14 | 20526500  |
| -32566  | RNASE2    | 0 | 804    | METT11D1  | 0 | chr14 | 20527000  |
| 33590   | HOPX      | 0 | 129    | HOPX      | 0 | chr4  | 57242500  |
| -234    | SLC7A5P2  | 0 | 78856  | METTL9    | 0 | chr16 | 21439500  |
| -40296  | CTSL1     | 0 | 1149   | CTSL3     | 0 | chr9  | 89576500  |
| 13552   | TNRC18    | 0 | 103203 | TNRC18    | 0 | chr7  | 5326500   |
| 14552   | TNRC18    | 0 | 102203 | TNRC18    | 0 | chr7  | 5327500   |
| -116624 | PDE8A     | 0 | 124874 | AKAP13    | 0 | chr15 | 83600000  |
| -126    | GOPC      | 0 | 72809  | NUS1      | 0 | chr6  | 118030500 |
| -626    | GOPC      | 0 | 72309  | NUS1      | 0 | chr6  | 118031000 |
| 9873    | GABRD     | 0 | 1552   | GABRD     | 0 | chr1  | 1950500   |
| 10373   | GABRD     | 0 | 1052   | GABRD     | 0 | chr1  | 1951000   |
| 10873   | GABRD     | 0 | 552    | GABRD     | 0 | chr1  | 1951500   |
| 16561   | C7orf26   | 0 | 1880   | C7orf26   | 0 | chr7  | 6613000   |
| 17061   | C7orf26   | 0 | 1380   | C7orf26   | 0 | chr7  | 6613500   |
| 17561   | C7orf26   | 0 | 880    | C7orf26   | 0 | chr7  | 6614000   |
| 1292    | DACT3     | 0 | 12235  | DACT3     | 0 | chr19 | 51844000  |
| 25006   | DNAH10    | 0 | 148218 | DNAH10    | 0 | chr12 | 122838000 |
| 132     | KCNK4     | 0 | 8579   | KCNK4     | 0 | chr11 | 63815500  |
| 632     | KCNK4     | 0 | 8079   | KCNK4     | 0 | chr11 | 63816000  |
| 14825   | MTL5      | 0 | 564    | MTL5      | 0 | chr11 | 68275000  |
| 7346    | OPLAH     | 0 | 2072   | OPLAH     | 0 | chr8  | 145185500 |
| 9618    | PRIC285   | 0 | 6536   | PRIC285   | 0 | chr20 | 61669500  |
| 8164    | FGFR3     | 0 | 7396   | FGFR3     | 0 | chr4  | 1773000   |
| 7642    | IRGQ      | 0 | 4127   | IRGQ      | 0 | chr19 | 48788000  |
| -1909   | MREG      | 0 | 22855  | PECR      | 0 | chr2  | 216588500 |
| 698     | IQSEC3    | 0 | 93255  | IQSEC3    | 0 | chr12 | 57500     |
| -624    | LOC284837 | 0 | 52043  | AGPAT3    | 0 | chr21 | 44057500  |
| -74759  | KIAA0754  | 0 | 404    | BMP8A     | 0 | chr1  | 39729500  |
| 96      | BMP8A     | 0 | 38128  | BMP8A     | 0 | chr1  | 39730000  |
| 22739   | TMEM175   | 0 | 3443   | TMEM175   | 0 | chr4  | 939000    |
| 23239   | TMEM175   | 0 | 2943   | TMEM175   | 0 | chr4  | 939500    |
| 19345   | KCNG2     | 0 | 16804  | KCNG2     | 0 | chr18 | 75744000  |
| 6837    | LOC285740 | 0 | 878    | LOC285740 | 0 | chr6  | 143924000 |
| 7337    | LOC285740 | 0 | 378    | LOC285740 | 0 | chr6  | 143924500 |
| 644     | C11orf35  | 0 | 5279   | C11orf35  | 0 | chr11 | 545500    |
| -1656   | DLG1      | 0 | 209550 | BDH1      | 0 | chr3  | 198511500 |
| -37362  | CEP350    | 0 | 2590   | QSOX1     | 0 | chr1  | 178388000 |

|         |           |   |        |           |   |       |           |
|---------|-----------|---|--------|-----------|---|-------|-----------|
| -6374   | IL11      | 0 | 15     | TMEM190   | 0 | chr19 | 60580000  |
| -76330  | NFYB      | 0 | 1188   | TXNRD1    | 0 | chr12 | 103132500 |
| 5968    | SUV420H2  | 0 | 2301   | SUV420H2  | 0 | chr19 | 60549000  |
| 6468    | SUV420H2  | 0 | 1801   | SUV420H2  | 0 | chr19 | 60549500  |
| 6968    | SUV420H2  | 0 | 1301   | SUV420H2  | 0 | chr19 | 60550000  |
| -33613  | GTPBP6    | 0 | 10469  | PPP2R3B   | 0 | chrX  | 204500    |
| -34113  | GTPBP6    | 0 | 9969   | PPP2R3B   | 0 | chrX  | 205000    |
| -69957  | FLJ40292  | 0 | 43061  | CACNA1B   | 0 | chr9  | 139849000 |
| 15025   | KCNQ2     | 0 | 23937  | KCNQ2     | 0 | chr20 | 61550500  |
| 15104   | ARHGAP36  | 0 | 16537  | ARHGAP36  | 0 | chrX  | 130035000 |
| 105     | STAB1     | 0 | 29051  | STAB1     | 0 | chr3  | 52504500  |
| -87045  | LOC400891 | 0 | 131213 | POM121L8P | 0 | chr22 | 19835500  |
| 5474    | ZIC4      | 0 | 15097  | ZIC4      | 0 | chr3  | 148592000 |
| 4636    | ERCC2     | 0 | 7185   | ERCC2     | 0 | chr19 | 50558500  |
| 5136    | ERCC2     | 0 | 6685   | ERCC2     | 0 | chr19 | 50559000  |
| -408    | BBS7      | 0 | 8132   | TRPC3     | 0 | chr4  | 123011500 |
| 29012   | SLC12A7   | 0 | 32672  | SLC12A7   | 0 | chr5  | 1132500   |
| 30012   | SLC12A7   | 0 | 31672  | SLC12A7   | 0 | chr5  | 1133500   |
| 7694    | WHSC1     | 0 | 81732  | WHSC1     | 0 | chr4  | 1872000   |
| 350     | WHSC1     | 0 | 47843  | WHSC1     | 0 | chr4  | 1872500   |
| 41732   | RNF212    | 0 | 582    | RNF212    | 0 | chr4  | 1097000   |
| 2366    | PCDH7     | 0 | 424019 | PCDH7     | 0 | chr4  | 30333500  |
| -236106 | C6orf208  | 0 | 224346 | LOC154449 | 0 | chr6  | 170181000 |
| 93236   | GLTSCR1   | 0 | 1846   | GLTSCR1   | 0 | chr19 | 52896500  |
| -1106   | MPHOSPH9  | 0 | 10293  | C12orf65  | 0 | chr12 | 122273500 |
| -1606   | MPHOSPH9  | 0 | 9793   | C12orf65  | 0 | chr12 | 122274000 |
| -167    | FAM65C    | 0 | 94487  | PARD6B    | 0 | chr20 | 48687000  |
| -7239   | COX19     | 0 | 360    | CYP2W1    | 0 | chr7  | 989000    |
| 140     | CYP2W1    | 0 | 6302   | CYP2W1    | 0 | chr7  | 989500    |
| 640     | CYP2W1    | 0 | 5802   | CYP2W1    | 0 | chr7  | 990000    |
| -89996  | TUBA3E    | 0 | 49785  | CCDC115   | 0 | chr2  | 130762500 |
| 15      | KCNQ2     | 0 | 66437  | KCNQ2     | 0 | chr20 | 61508000  |
| 164047  | MAD1L1    | 0 | 253109 | MAD1L1    | 0 | chr7  | 1986000   |
| 164547  | MAD1L1    | 0 | 252609 | MAD1L1    | 0 | chr7  | 1986500   |
| 8843    | FAM9C     | 0 | 221    | FAM9C     | 0 | chrX  | 12972500  |
| 239     | CCDC85A   | 0 | 201813 | CCDC85A   | 0 | chr2  | 56265000  |
| -75     | BNIP3     | 0 | 122802 | JAKMIP3   | 0 | chr10 | 133645500 |
| 3641    | LRRC4     | 0 | 238    | LRRC4     | 0 | chr7  | 127458000 |
| 10693   | SEMA3G    | 0 | 1083   | SEMA3G    | 0 | chr3  | 52453000  |
| 11193   | SEMA3G    | 0 | 583    | SEMA3G    | 0 | chr3  | 52453500  |
| -36213  | MYOM2     | 0 | 663281 | CSMD1     | 0 | chr8  | 2117000   |
| 36242   | AGAP3     | 0 | 21456  | AGAP3     | 0 | chr7  | 150451000 |
| 36742   | AGAP3     | 0 | 20956  | AGAP3     | 0 | chr7  | 150451500 |
| -648    | TSPYL5    | 0 | 365582 | MTDH      | 0 | chr8  | 98360000  |
| 13547   | FZR1      | 0 | 255    | FZR1      | 0 | chr19 | 3487500   |
| -245    | FZR1      | 0 | 1262   | C19orf28  | 0 | chr19 | 3488000   |
| -148    | ARFGAP3   | 0 | 13380  | PACSIN2   | 0 | chr22 | 41583500  |
| 565     | GPX4      | 0 | 2287   | GPX4      | 0 | chr19 | 1055500   |
| -4737   | EPT1      | 0 | 1287   | C2orf39   | 0 | chr2  | 26477000  |
| -98     | TRIML2    | 0 | 34091  | TRIML1    | 0 | chr4  | 189263500 |
| 60321   | FAM196A   | 0 | 412    | FAM196A   | 0 | chr10 | 128884000 |
| -88     | FAM196A   | 0 | 353102 | NPS       | 0 | chr10 | 128884500 |
| 25352   | C7orf50   | 0 | 115919 | C7orf50   | 0 | chr7  | 1028500   |
| 26352   | C7orf50   | 0 | 114919 | C7orf50   | 0 | chr7  | 1029500   |
| -166301 | TMEM215   | 0 | 17107  | APTX      | 0 | chr9  | 32945500  |
| -166801 | TMEM215   | 0 | 16607  | APTX      | 0 | chr9  | 32946000  |
| -38012  | TCP10     | 0 | 172069 | C6orf123  | 0 | chr6  | 167756000 |
| -38512  | TCP10     | 0 | 171569 | C6orf123  | 0 | chr6  | 167756500 |

|         |                |   |         |              |   |       |           |
|---------|----------------|---|---------|--------------|---|-------|-----------|
| 50473   | LOXHD1         | 0 | 41624   | LOXHD1       | 0 | chr18 | 42394000  |
| 21246   | HDGFRP2        | 0 | 8722    | HDGFRP2      | 0 | chr19 | 4444500   |
| -6002   | SLC25A6        | 0 | 2423    | ASMTLAS      | 0 | chrX  | 1477000   |
| -6502   | SLC25A6        | 0 | 1923    | ASMTLAS      | 0 | chrX  | 1477500   |
| -7002   | SLC25A6        | 0 | 1423    | ASMTLAS      | 0 | chrX  | 1478000   |
| -78379  | NEDD4          | 0 | 95022   | RFX7         | 0 | chr15 | 54075000  |
| -660    | OSM            | 0 | 17606   | GATSL3       | 0 | chr22 | 28993500  |
| -70     | TPN20B,PTPN20, | 0 | 425379  | AM25G,FAM25C | 0 | chr10 | 48448000  |
| -100558 | POTEG          | 0 | 298453  | POTEM        | 0 | chr14 | 18755500  |
| 3608    | C2orf16        | 0 | 2593    | C2orf16      | 0 | chr2  | 27656500  |
| 4718    | ZNF324B        | 0 | 1511    | ZNF324B      | 0 | chr19 | 63659500  |
| 27938   | ADAP1          | 0 | 28815   | ADAP1        | 0 | chr7  | 932000    |
| 28438   | ADAP1          | 0 | 28315   | ADAP1        | 0 | chr7  | 932500    |
| -2070   | SIK1           | 0 | 20831   | C21orf125    | 0 | chr21 | 43673500  |
| 15914   | SLC29A4        | 0 | 5230    | SLC29A4      | 0 | chr7  | 5305000   |
| 16414   | SLC29A4        | 0 | 4730    | SLC29A4      | 0 | chr7  | 5305500   |
| 9307    | SCAF1          | 0 | 7217    | SCAF1        | 0 | chr19 | 54846500  |
| 9807    | SCAF1          | 0 | 6717    | SCAF1        | 0 | chr19 | 54847000  |
| 35829   | MAEA           | 0 | 14425   | MAEA         | 0 | chr4  | 1309500   |
| -83365  | ALLC           | 0 | 1938749 | SOX11        | 0 | chr2  | 3811500   |
| 5017    | A1BG           | 0 | 1677    | A1BG         | 0 | chr19 | 63555000  |
| 353     | A1BGAS         | 0 | 2861    | A1BGAS       | 0 | chr19 | 63555500  |
| 13854   | PEAR1          | 0 | 8850    | PEAR1        | 0 | chr1  | 155144000 |
| 14354   | PEAR1          | 0 | 8350    | PEAR1        | 0 | chr1  | 155144500 |
| 73685   | RARS2          | 0 | 1954    | RARS2        | 0 | chr6  | 88354500  |
| 74185   | RARS2          | 0 | 1454    | RARS2        | 0 | chr6  | 88355000  |
| -26871  | C14orf80       | 0 | 497     | TMEM121      | 0 | chr14 | 105063500 |
| 3       | TMEM121        | 0 | 3584    | TMEM121      | 0 | chr14 | 105064000 |
| 8881    | GLTSCR2        | 0 | 2627    | GLTSCR2      | 0 | chr19 | 52949500  |
| 9381    | GLTSCR2        | 0 | 2127    | GLTSCR2      | 0 | chr19 | 52950000  |
| 9881    | GLTSCR2        | 0 | 1627    | GLTSCR2      | 0 | chr19 | 52950500  |
| -307354 | PWRN2          | 0 | 80896   | PWRN1        | 0 | chr15 | 22273500  |
| 8900    | GJB6           | 0 | 372     | GJB6         | 0 | chr13 | 19703000  |
| -128    | GJB6           | 0 | 172305  | CRYL1        | 0 | chr13 | 19703500  |
| 307801  | KSR2           | 0 | 207411  | KSR2         | 0 | chr12 | 116683000 |
| 308301  | KSR2           | 0 | 206911  | KSR2         | 0 | chr12 | 116683500 |
| -11184  | C21orf70       | 0 | 11056   | NCRNA00162   | 0 | chr21 | 45232500  |
| -16878  | TSPY3          | 0 | 63329   | RBMY3AP      | 0 | chrY  | 9995000   |
| -17378  | TSPY3          | 0 | 62829   | RBMY3AP      | 0 | chrY  | 9995500   |
| 4687    | DMRTA2         | 0 | 1229    | DMRTA2       | 0 | chr1  | 50660500  |
| 11096   | LOC389033      | 0 | 360     | LOC389033    | 0 | chr2  | 130408000 |
| -1143   | PUS1           | 0 | 4960    | EP400        | 0 | chr12 | 130995500 |
| 1200    | BRD4           | 0 | 41762   | BRD4         | 0 | chr19 | 15210500  |
| 1700    | BRD4           | 0 | 41262   | BRD4         | 0 | chr19 | 15211000  |
| 1200    | ZAP70          | 0 | 4255    | ZAP70        | 0 | chr2  | 97718500  |
| 1214    | SEMA6C         | 0 | 13728   | SEMA6C       | 0 | chr1  | 149372000 |
| 199     | SNN            | 0 | 10509   | SNN          | 0 | chr16 | 11670000  |
| 699     | SNN            | 0 | 10009   | SNN          | 0 | chr16 | 11670500  |
| -829    | AKTIP          | 0 | 95818   | RPGRIP1L     | 0 | chr16 | 52095500  |
| -1329   | AKTIP          | 0 | 95318   | RPGRIP1L     | 0 | chr16 | 52096000  |
| 9645    | METRNL         | 0 | 5511    | METRNL       | 0 | chr17 | 78640500  |
| 10145   | METRNL         | 0 | 5011    | METRNL       | 0 | chr17 | 78641000  |
| -623774 | ERICH1         | 0 | 141975  | DLGAP2       | 0 | chr8  | 1295000   |
| -1231   | CD7            | 0 | 2188    | SECTM1       | 0 | chr17 | 77870000  |
| -1731   | CD7            | 0 | 1688    | SECTM1       | 0 | chr17 | 77870500  |
| -2231   | CD7            | 0 | 1188    | SECTM1       | 0 | chr17 | 77871000  |
| -41526  | SSX2           | 0 | 2532    | SSX2         | 0 | chrX  | 52794500  |
| -42026  | SSX2           | 0 | 2032    | SSX2         | 0 | chrX  | 52795000  |

|         |              |   |        |           |   |       |           |
|---------|--------------|---|--------|-----------|---|-------|-----------|
| -2201   | GPR132       | 0 | 74120  | JAG2      | 0 | chr14 | 104605000 |
| 7204    | C2orf64      | 0 | 1887   | C2orf64   | 0 | chr2  | 98589500  |
| 1251    | FAM27B       | 0 | 9      | FAM27B    | 0 | chr9  | 67384000  |
| 14327   | HMHA1        | 0 | 5127   | HMHA1     | 0 | chr19 | 1032500   |
| -223    | TNK2         | 0 | 50689  | SDHAP1    | 0 | chr3  | 197120500 |
| 16539   | NOP14        | 0 | 8916   | NOP14     | 0 | chr4  | 2926000   |
| 17039   | NOP14        | 0 | 8416   | NOP14     | 0 | chr4  | 2926500   |
| 17539   | NOP14        | 0 | 7916   | NOP14     | 0 | chr4  | 2927000   |
| 22721   | ERBB2        | 0 | 5941   | ERBB2     | 0 | chr17 | 35132500  |
| 23221   | ERBB2        | 0 | 5441   | ERBB2     | 0 | chr17 | 35133000  |
| 23721   | ERBB2        | 0 | 4941   | ERBB2     | 0 | chr17 | 35133500  |
| -27941  | LOC100130238 | 0 | 181729 | FBRSL1    | 0 | chr12 | 131395500 |
| 46339   | TRIM66       | 0 | 459    | TRIM66    | 0 | chr11 | 8636500   |
| 53007   | MRC2         | 0 | 13184  | MRC2      | 0 | chr17 | 58111500  |
| 998     | FASN         | 0 | 18895  | FASN      | 0 | chr17 | 77630500  |
| 22885   | SETD1A       | 0 | 4482   | SETD1A    | 0 | chr16 | 30899000  |
| 23385   | SETD1A       | 0 | 3982   | SETD1A    | 0 | chr16 | 30899500  |
| 688     | C21orf119    | 0 | 135    | C21orf119 | 0 | chr21 | 32688000  |
| -70982  | APOH         | 0 | 2387   | PRKCA     | 0 | chr17 | 61727000  |
| 12626   | NCLN         | 0 | 11073  | NCLN      | 0 | chr19 | 3149500   |
| 13126   | NCLN         | 0 | 10573  | NCLN      | 0 | chr19 | 3150000   |
| 118     | PHYHD1       | 0 | 19641  | PHYHD1    | 0 | chr9  | 130724500 |
| -121465 | DDX12        | 0 | 25636  | KLRB1     | 0 | chr12 | 9613500   |
| 7679    | ZBTB46       | 0 | 53300  | ZBTB46    | 0 | chr20 | 61854000  |
| 8179    | ZBTB46       | 0 | 52800  | ZBTB46    | 0 | chr20 | 61854500  |
| 1438    | DGKZ         | 0 | 33680  | DGKZ      | 0 | chr11 | 46325000  |
| 979     | MMP23A       | 0 | 890    | MMP23A    | 0 | chr1  | 1559000   |
| -83864  | C21orf81     | 0 | 44505  | LIPI      | 0 | chr21 | 14358500  |
| 13266   | WDR5         | 0 | 6915   | WDR5      | 0 | chr9  | 136008000 |
| -534    | GRWD1        | 0 | 1077   | KCNJ14    | 0 | chr19 | 53649500  |
| -54951  | DLGAP2       | 0 | 276    | CLN8      | 0 | chr8  | 1699000   |
| -10748  | TTYH2        | 0 | 1491   | DNAI2     | 0 | chr17 | 69780500  |
| -174536 | SLC6A10P     | 0 | 133156 | TP53TG3B  | 0 | chr16 | 32978500  |
| -14090  | SNORD68      | 0 | 176    | CPNE7     | 0 | chr16 | 88169500  |
| 324     | CPNE7        | 0 | 21154  | CPNE7     | 0 | chr16 | 88170000  |
| -7810   | DUS3L        | 0 | 24817  | NRTN      | 0 | chr19 | 5750000   |
| -8310   | DUS3L        | 0 | 24317  | NRTN      | 0 | chr19 | 5750500   |
| 1476    | PDF,COG8     | 0 | 499    | PDF,COG8  | 0 | chr16 | 67921500  |
| 5901    | KCNG1        | 0 | 13582  | KCNG1     | 0 | chr20 | 49059500  |
| -5482   | LOC645323    | 0 | 34314  | MEF2C     | 0 | chr5  | 88015500  |
| -5982   | LOC645323    | 0 | 33814  | MEF2C     | 0 | chr5  | 88016000  |
| -6482   | LOC645323    | 0 | 33314  | MEF2C     | 0 | chr5  | 88016500  |
| 19410   | COL6A1       | 0 | 3891   | COL6A1    | 0 | chr21 | 46245500  |
| 21410   | COL6A1       | 0 | 1891   | COL6A1    | 0 | chr21 | 46247500  |
| 21910   | COL6A1       | 0 | 1391   | COL6A1    | 0 | chr21 | 46248000  |
| -30359  | H19          | 0 | 100922 | IGF2      | 0 | chr11 | 2006000   |
| -30859  | H19          | 0 | 100422 | IGF2      | 0 | chr11 | 2006500   |
| 7137    | AMDHD2       | 0 | 2232   | AMDHD2    | 0 | chr16 | 2517500   |
| 11022   | RNFT2        | 0 | 104319 | RNFT2     | 0 | chr12 | 115671500 |
| 11522   | RNFT2        | 0 | 103819 | RNFT2     | 0 | chr12 | 115672000 |
| 12022   | RNFT2        | 0 | 103319 | RNFT2     | 0 | chr12 | 115672500 |
| 298     | EGFL7        | 0 | 9451   | EGFL7     | 0 | chr9  | 138677500 |
| 19831   | ARHGAP23     | 0 | 35153  | ARHGAP23  | 0 | chr17 | 33887000  |
| 20331   | ARHGAP23     | 0 | 34653  | ARHGAP23  | 0 | chr17 | 33887500  |
| -15660  | LRRK1        | 0 | 89954  | CHSY1     | 0 | chr15 | 99443500  |
| -16160  | LRRK1        | 0 | 89454  | CHSY1     | 0 | chr15 | 99444000  |
| -44086  | HTRA1        | 0 | 1670   | DMBT1     | 0 | chr10 | 124308500 |
| 697     | MRPS2        | 0 | 3340   | MRPS2     | 0 | chr9  | 137533000 |

|         |            |   |        |            |   |       |           |
|---------|------------|---|--------|------------|---|-------|-----------|
| -1717   | BACH2      | 0 | 217073 | MAP3K7     | 0 | chr6  | 91065000  |
| -96480  | GOT1       | 0 | 5679   | NKX2-3     | 0 | chr10 | 101277000 |
| -96980  | GOT1       | 0 | 5179   | NKX2-3     | 0 | chr10 | 101277500 |
| 25801   | TTBK1      | 0 | 18975  | TTBK1      | 0 | chr6  | 43345000  |
| 26301   | TTBK1      | 0 | 18475  | TTBK1      | 0 | chr6  | 43345500  |
| -878261 | XYLT1      | 0 | 8955   | PKD1P1     | 0 | chr16 | 18350500  |
| -878761 | XYLT1      | 0 | 8455   | PKD1P1     | 0 | chr16 | 18351000  |
| -43825  | SRD5A1     | 0 | 1217   | PAPD7      | 0 | chr5  | 6766500   |
| 18991   | ABR        | 0 | 164866 | ABR        | 0 | chr17 | 872500    |
| 19491   | ABR        | 0 | 164366 | ABR        | 0 | chr17 | 873000    |
| 4769    | AKT1       | 0 | 19483  | AKT1       | 0 | chr14 | 104311500 |
| 55981   | TC2N       | 0 | 602    | TC2N       | 0 | chr14 | 91372000  |
| 56481   | TC2N       | 0 | 102    | TC2N       | 0 | chr14 | 91372500  |
| 308     | CAPS       | 0 | 1722   | CAPS       | 0 | chr19 | 5865500   |
| 808     | CAPS       | 0 | 1222   | CAPS       | 0 | chr19 | 5866000   |
| 190     | FJX1       | 0 | 2495   | FJX1       | 0 | chr11 | 35596500  |
| 690     | FJX1       | 0 | 1995   | FJX1       | 0 | chr11 | 35597000  |
| -1739   | FAM171A2   | 0 | 6575   | ITGA2B     | 0 | chr17 | 39798500  |
| 25115   | TUBBP5     | 0 | 2205   | TUBBP5     | 0 | chr9  | 140189500 |
| -8955   | BRPF3      | 0 | 1422   | PNPLA1     | 0 | chr6  | 36317500  |
| 26093   | GNA11      | 0 | 954    | GNA11      | 0 | chr19 | 3071500   |
| -46     | GNA11      | 0 | 14690  | GNA15      | 0 | chr19 | 3072500   |
| 4755    | NEU4       | 0 | 1907   | NEU4       | 0 | chr2  | 242405500 |
| 5255    | NEU4       | 0 | 1407   | NEU4       | 0 | chr2  | 242406000 |
| 4852    | TTLL10     | 0 | 19176  | TTLL10     | 0 | chr1  | 1104000   |
| 5352    | TTLL10     | 0 | 18676  | TTLL10     | 0 | chr1  | 1104500   |
| -25097  | TPTE2      | 0 | 71879  | MPHOSPH8   | 0 | chr13 | 19034000  |
| -93361  | UNCX       | 0 | 104020 | MICALL2    | 0 | chr7  | 1336500   |
| -93861  | UNCX       | 0 | 103520 | MICALL2    | 0 | chr7  | 1337000   |
| -37890  | BTBD1      | 0 | 2327   | TM6SF1     | 0 | chr15 | 81565000  |
| -38390  | BTBD1      | 0 | 1827   | TM6SF1     | 0 | chr15 | 81565500  |
| -191005 | ANKRD30BL  | 0 | 63616  | GPR39      | 0 | chr2  | 132827000 |
| -191505 | ANKRD30BL  | 0 | 63116  | GPR39      | 0 | chr2  | 132827500 |
| -205324 | AKT3       | 0 | 2683   | ZNF238     | 0 | chr1  | 242278500 |
| 33355   | SCN4A      | 0 | 1010   | SCN4A      | 0 | chr17 | 59403000  |
| 17686   | C18orf62   | 0 | 77     | C18orf62   | 0 | chr18 | 71268500  |
| -387    | TNFRSF14   | 0 | 21108  | C1orf93    | 0 | chr1  | 2487000   |
| -887    | TNFRSF14   | 0 | 20608  | C1orf93    | 0 | chr1  | 2487500   |
| 8713    | C6orf204   | 0 | 151713 | C6orf204   | 0 | chr6  | 118928000 |
| 9213    | C6orf204   | 0 | 151213 | C6orf204   | 0 | chr6  | 118928500 |
| 23108   | HCN2       | 0 | 4159   | HCN2       | 0 | chr19 | 564000    |
| 4434    | DPEP3      | 0 | 453    | DPEP3      | 0 | chr16 | 66571500  |
| 640     | LASS1,GDF1 | 0 | 26953  | LASS1,GDF1 | 0 | chr19 | 18841000  |
| 1140    | LASS1,GDF1 | 0 | 26453  | LASS1,GDF1 | 0 | chr19 | 18841500  |
| -52878  | GEMIN7     | 0 | 7500   | NKPD1      | 0 | chr19 | 50339500  |
| -53378  | GEMIN7     | 0 | 7000   | NKPD1      | 0 | chr19 | 50340000  |
| -53878  | GEMIN7     | 0 | 6500   | NKPD1      | 0 | chr19 | 50340500  |
| -92806  | C22orf34   | 0 | 22940  | BRD1       | 0 | chr22 | 48530000  |
| -93306  | C22orf34   | 0 | 22440  | BRD1       | 0 | chr22 | 48530500  |
| -1441   | NOTCH1     | 0 | 115697 | EGFL7      | 0 | chr9  | 138561500 |
| 109054  | PROM1      | 0 | 6721   | PROM1      | 0 | chr4  | 15688000  |
| 109554  | PROM1      | 0 | 6221   | PROM1      | 0 | chr4  | 15688500  |
| 1311    | GNAS       | 0 | 70145  | GNAS       | 0 | chr20 | 56849500  |
| 67552   | TNRC18     | 0 | 49203  | TNRC18     | 0 | chr7  | 5380500   |
| 14906   | ZNF488     | 0 | 3874   | ZNF488     | 0 | chr10 | 47990000  |
| 6337    | LMNB2      | 0 | 22458  | LMNB2      | 0 | chr19 | 2385500   |
| 174     | LIMD1      | 0 | 86259  | LIMD1      | 0 | chr3  | 45611500  |
| -409    | ZNF484     | 0 | 68921  | FGD3       | 0 | chr9  | 94680500  |



|         |          |   |        |          |   |       |           |
|---------|----------|---|--------|----------|---|-------|-----------|
| 316490  | PTPRN2   | 0 | 732243 | PTPRN2   | 0 | chr7  | 157341000 |
| -21473  | NKX6-2   | 0 | 886    | C10orf92 | 0 | chr10 | 134471000 |
| 1228    | GPT      | 0 | 1863   | GPT      | 0 | chr8  | 145701500 |
| -1408   | FBXL14   | 0 | 21482  | WNT5B    | 0 | chr12 | 1575000   |
| 68321   | RYR1     | 0 | 85544  | RYR1     | 0 | chr19 | 43684500  |
| 68821   | RYR1     | 0 | 85044  | RYR1     | 0 | chr19 | 43685000  |
| -31639  | RAET1L   | 0 | 7435   | ULBP3    | 0 | chr6  | 150420000 |
| -23817  | GPR17    | 0 | 24566  | SFT2D3   | 0 | chr2  | 128150500 |
| 4671    | DOK2     | 0 | 151    | DOK2     | 0 | chr8  | 21827000  |
| 9518    | WNT5B    | 0 | 20638  | WNT5B    | 0 | chr12 | 1606000   |
| 10018   | WNT5B    | 0 | 20138  | WNT5B    | 0 | chr12 | 1606500   |
| 19284   | SS18L1   | 0 | 19461  | SS18L1   | 0 | chr20 | 60171500  |
| 19784   | SS18L1   | 0 | 18961  | SS18L1   | 0 | chr20 | 60172000  |
| -44845  | RCN2     | 0 | 19     | PSTPIP1  | 0 | chr15 | 75074500  |
| 1975    | RNF126   | 0 | 13727  | RNF126   | 0 | chr19 | 600500    |
| 9392    | SQSTM1   | 0 | 21681  | SQSTM1   | 0 | chr5  | 179176000 |
| 9892    | SQSTM1   | 0 | 21181  | SQSTM1   | 0 | chr5  | 179176500 |
| 3555    | SLC43A2  | 0 | 50880  | SLC43A2  | 0 | chr17 | 1428000   |
| -1593   | NEU4     | 0 | 31705  | PDCD1    | 0 | chr2  | 242409000 |
| -619    | RAB6B    | 0 | 31679  | C3orf36  | 0 | chr3  | 135098000 |
| 42675   | SIRPA    | 0 | 2040   | SIRPA    | 0 | chr20 | 1866500   |
| -245598 | AQP9     | 0 | 466    | LIPC     | 0 | chr15 | 56511000  |
| 34      | LIPC     | 0 | 136865 | LIPC     | 0 | chr15 | 56511500  |
| 19837   | CDH15    | 0 | 3901   | CDH15    | 0 | chr16 | 87785500  |
| -62202  | CTSD     | 0 | 8249   | SYT8     | 0 | chr11 | 1804000   |
| 48627   | ITIH5    | 0 | 46940  | ITIH5    | 0 | chr10 | 7702000   |
| 49127   | ITIH5    | 0 | 46440  | ITIH5    | 0 | chr10 | 7702500   |
| 356     | BCL2L14  | 0 | 28394  | BCL2L14  | 0 | chr12 | 12115500  |
| 332     | BCL2L14  | 0 | 27894  | BCL2L14  | 0 | chr12 | 12116000  |
| -36218  | RAB10    | 0 | 17007  | HADHA    | 0 | chr2  | 26250000  |
| 222     | TMEM89   | 0 | 693    | TMEM89   | 0 | chr3  | 48633500  |
| -50870  | LY6H     | 0 | 2442   | GPIHBP1  | 0 | chr8  | 144364000 |
| -26673  | CSF2RA   | 0 | 8      | IL3RA    | 0 | chrY  | 1415500   |
| 298     | ZNF579   | 0 | 3023   | ZNF579   | 0 | chr19 | 60781000  |
| 798     | ZNF579   | 0 | 2523   | ZNF579   | 0 | chr19 | 60781500  |
| 5706    | B4GALNT4 | 0 | 6616   | B4GALNT4 | 0 | chr11 | 365500    |
| 6206    | B4GALNT4 | 0 | 6116   | B4GALNT4 | 0 | chr11 | 366000    |
| 6706    | B4GALNT4 | 0 | 5616   | B4GALNT4 | 0 | chr11 | 366500    |
| 47259   | CACNA1H  | 0 | 21273  | CACNA1H  | 0 | chr16 | 1190500   |
| 384     | KIAA1875 | 0 | 10206  | KIAA1875 | 0 | chr8  | 145235000 |
| 27367   | RARRES1  | 0 | 469    | RARRES1  | 0 | chr3  | 159932500 |
| -31     | RARRES1  | 0 | 69605  | MFSD1    | 0 | chr3  | 159933000 |
| 86428   | NFIC     | 0 | 10603  | NFIC     | 0 | chr19 | 3404000   |
| 86928   | NFIC     | 0 | 10103  | NFIC     | 0 | chr19 | 3404500   |
| -693    | CGB2     | 0 | 1637   | CGB1     | 0 | chr19 | 54229000  |
| 135158  | SDK1     | 0 | 4157   | SDK1     | 0 | chr7  | 4271000   |
| -6469   | C21orf84 | 0 | 44499  | HSF2BP   | 0 | chr21 | 43729000  |
| -6969   | C21orf84 | 0 | 43999  | HSF2BP   | 0 | chr21 | 43729500  |
| 63746   | CDH20    | 0 | 845    | CDH20    | 0 | chr18 | 57372500  |
| -10269  | PDCD1    | 0 | 558    | C2orf85  | 0 | chr2  | 242460000 |
| -1732   | SSX2IP   | 0 | 121173 | LPAR3    | 0 | chr1  | 84930500  |
| -2232   | SSX2IP   | 0 | 120673 | LPAR3    | 0 | chr1  | 84931000  |
| 3383    | SIGLEC14 | 0 | 944    | SIGLEC14 | 0 | chr19 | 56841000  |
| 3883    | SIGLEC14 | 0 | 444    | SIGLEC14 | 0 | chr19 | 56841500  |
| 27148   | RAI14    | 0 | 148973 | RAI14    | 0 | chr5  | 34719500  |
| 27648   | RAI14    | 0 | 148473 | RAI14    | 0 | chr5  | 34720000  |
| 14453   | ZDHHC6   | 0 | 2162   | ZDHHC6   | 0 | chr10 | 114194500 |
| 14953   | ZDHHC6   | 0 | 1662   | ZDHHC6   | 0 | chr10 | 114195000 |

|          |             |   |         |          |   |       |           |
|----------|-------------|---|---------|----------|---|-------|-----------|
| -71290   | ZNF782      | 0 | 2912    | FAM22G   | 0 | chr9  | 98727500  |
| -71790   | ZNF782      | 0 | 2412    | FAM22G   | 0 | chr9  | 98728000  |
| -72290   | ZNF782      | 0 | 1912    | FAM22G   | 0 | chr9  | 98728500  |
| -270     | CELA1       | 0 | 5099    | GALNT6   | 0 | chr12 | 50027000  |
| -51861   | UNCX        | 0 | 145520  | MICALL2  | 0 | chr7  | 1295000   |
| 688      | SCT         | 0 | 173     | SCT      | 0 | chr11 | 617000    |
| -827     | SCT         | 0 | 9304    | DRD4     | 0 | chr11 | 618000    |
| 7426     | CDHR5       | 0 | 1007    | CDHR5    | 0 | chr11 | 614000    |
| 7926     | CDHR5       | 0 | 507     | CDHR5    | 0 | chr11 | 614500    |
| 8426     | CDHR5       | 0 | 7       | CDHR5    | 0 | chr11 | 615000    |
| 11368    | SBNO2       | 0 | 13273   | SBNO2    | 0 | chr19 | 1070000   |
| 11021    | ZNF74       | 0 | 3252    | ZNF74    | 0 | chr22 | 19089500  |
| 11521    | ZNF74       | 0 | 2752    | ZNF74    | 0 | chr22 | 19090000  |
| 12021    | ZNF74       | 0 | 2252    | ZNF74    | 0 | chr22 | 19090500  |
| 70377    | KDM4B       | 0 | 114108  | KDM4B    | 0 | chr19 | 4990500   |
| 70877    | KDM4B       | 0 | 113608  | KDM4B    | 0 | chr19 | 4991000   |
| 2070     | GNAS        | 0 | 56145   | GNAS     | 0 | chr20 | 56863500  |
| 2570     | GNAS        | 0 | 55645   | GNAS     | 0 | chr20 | 56864000  |
| 3070     | GNAS        | 0 | 55145   | GNAS     | 0 | chr20 | 56864500  |
| -9361    | CHRNA4      | 0 | 35485   | KCNQ2    | 0 | chr20 | 61472500  |
| -9861    | CHRNA4      | 0 | 34985   | KCNQ2    | 0 | chr20 | 61473000  |
| -10361   | CHRNA4      | 0 | 34485   | KCNQ2    | 0 | chr20 | 61473500  |
| 27061    | CHD5        | 0 | 51270   | CHD5     | 0 | chr1  | 6111500   |
| -1396    | CD22        | 0 | 2784    | FFAR1    | 0 | chr19 | 40531500  |
| 144428   | HTR4        | 0 | 434     | HTR4     | 0 | chr5  | 148013500 |
| 37587    | TBC1D16     | 0 | 58242   | TBC1D16  | 0 | chr17 | 75566000  |
| 38087    | TBC1D16     | 0 | 57742   | TBC1D16  | 0 | chr17 | 75566500  |
| -17691   | ZNF572      | 0 | 1400    | SQLE     | 0 | chr8  | 126078500 |
| -18191   | ZNF572      | 0 | 900     | SQLE     | 0 | chr8  | 126079000 |
| 64403    | METT10D     | 0 | 31450   | METT10D  | 0 | chr17 | 2330500   |
| 64903    | METT10D     | 0 | 30950   | METT10D  | 0 | chr17 | 2331000   |
| -6024    | GLI4        | 0 | 8433    | ZNF696   | 0 | chr8  | 144436500 |
| -7024    | GLI4        | 0 | 7433    | ZNF696   | 0 | chr8  | 144437500 |
| -1088    | AMY1B,AMY1C | 0 | 52301   | AMY1A    | 0 | chr1  | 104041500 |
| 54538    | TCF20       | 0 | 889     | TCF20    | 0 | chr22 | 40940500  |
| 55038    | TCF20       | 0 | 389     | TCF20    | 0 | chr22 | 40941000  |
| 29358    | ELAVL3      | 0 | 303     | ELAVL3   | 0 | chr19 | 11452500  |
| -197     | ELAVL3      | 0 | 2245    | ZNF653   | 0 | chr19 | 11453000  |
| 32       | KIAA0649    | 0 | 9060    | KIAA0649 | 0 | chr9  | 137511500 |
| -170697  | RAPH1       | 0 | 442     | CD28     | 0 | chr2  | 204279000 |
| -6671    | KLHDC10     | 0 | 24290   | TMEM209  | 0 | chr7  | 129567500 |
| 2169     | GGN         | 0 | 1508    | GGN      | 0 | chr19 | 43569000  |
| 2669     | GGN         | 0 | 1008    | GGN      | 0 | chr19 | 43569500  |
| 7090     | TNXB        | 0 | 61129   | TNXB     | 0 | chr6  | 32124000  |
| 620      | CTXN1       | 0 | 1051    | CTXN1    | 0 | chr19 | 7896000   |
| -131376  | ZNF99       | 0 | 456337  | ZNF91    | 0 | chr19 | 22876000  |
| -138096  | MTR         | 0 | 324     | RYR2     | 0 | chr1  | 235272000 |
| -38492   | CLC         | 0 | 73      | LEUTX    | 0 | chr19 | 44959000  |
| -2637707 | C4orf33     | 0 | 1398919 | PCDH10   | 0 | chr4  | 132891000 |
| -2638207 | C4orf33     | 0 | 1398419 | PCDH10   | 0 | chr4  | 132891500 |
| -817     | PSMD12      | 0 | 10385   | PITPNC1  | 0 | chr17 | 62794000  |
| -1317    | PSMD12      | 0 | 9885    | PITPNC1  | 0 | chr17 | 62794500  |
| -43916   | TMEM121     | 0 | 343382  | KIAA0125 | 0 | chr14 | 105111500 |
| 19510    | C21orf56    | 0 | 3801    | C21orf56 | 0 | chr21 | 46425000  |
| 20010    | C21orf56    | 0 | 3301    | C21orf56 | 0 | chr21 | 46425500  |
| 7575     | GTPBP6      | 0 | 1887    | GTPBP6   | 0 | chrY  | 169000    |
| 8075     | GTPBP6      | 0 | 1387    | GTPBP6   | 0 | chrY  | 169500    |
| -56636   | CXXC5       | 0 | 56089   | PSD2     | 0 | chr5  | 139099500 |

|         |          |   |        |              |   |       |           |
|---------|----------|---|--------|--------------|---|-------|-----------|
| -90720  | PLN      | 0 | 184627 | ASF1A        | 0 | chr6  | 119079000 |
| 278001  | FBN2     | 0 | 2134   | FBN2         | 0 | chr5  | 127899500 |
| 278501  | FBN2     | 0 | 1634   | FBN2         | 0 | chr5  | 127900000 |
| -260847 | SYK      | 0 | 54417  | AUH          | 0 | chr9  | 92961500  |
| -261347 | SYK      | 0 | 53917  | AUH          | 0 | chr9  | 92962000  |
| -261847 | SYK      | 0 | 53417  | AUH          | 0 | chr9  | 92962500  |
| -766    | LGALS7B  | 0 | 9150   | LGALS4       | 0 | chr19 | 43975000  |
| -694170 | INSC     | 0 | 25071  | SOX6         | 0 | chr11 | 15919500  |
| 6482    | ZFP161   | 0 | 200    | ZFP161       | 0 | chr18 | 5285500   |
| -23017  | UCK1     | 0 | 22477  | RAPGEF1      | 0 | chr9  | 133419500 |
| -23517  | UCK1     | 0 | 21977  | RAPGEF1      | 0 | chr9  | 133420000 |
| -4402   | OTX2     | 0 | 392446 | EXOC5        | 0 | chr14 | 56346500  |
| -431    | CCDC27   | 0 | 711    | LOC388588    | 0 | chr1  | 3678500   |
| -931    | CCDC27   | 0 | 211    | LOC388588    | 0 | chr1  | 3679000   |
| 14928   | NFIC     | 0 | 82103  | NFIC         | 0 | chr19 | 3332500   |
| 15677   | MUC6     | 0 | 8206   | MUC6         | 0 | chr11 | 1018500   |
| 16177   | MUC6     | 0 | 7706   | MUC6         | 0 | chr11 | 1019000   |
| 16677   | MUC6     | 0 | 7206   | MUC6         | 0 | chr11 | 1019500   |
| 11756   | REXO1    | 0 | 21452  | REXO1        | 0 | chr19 | 1778000   |
| 12256   | REXO1    | 0 | 20952  | REXO1        | 0 | chr19 | 1778500   |
| -277    | SNORA5B  | 0 | 51391  | RAMP3        | 0 | chr7  | 45112500  |
| 1741    | OR11A1   | 0 | 488    | OR11A1       | 0 | chr6  | 29503000  |
| -12     | OR11A1   | 0 | 12271  | OR10C1       | 0 | chr6  | 29503500  |
| 4230    | CCDC88B  | 0 | 13082  | CCDC88B      | 0 | chr11 | 63868500  |
| 4730    | CCDC88B  | 0 | 12582  | CCDC88B      | 0 | chr11 | 63869000  |
| 5244    | MAD2L1BP | 0 | 6166   | MAD2L1BP     | 0 | chr6  | 43710500  |
| -74911  | KIAA1012 | 0 | 442    | RNF125       | 0 | chr18 | 27852000  |
| 983     | HIPK4    | 0 | 9934   | HIPK4        | 0 | chr19 | 45578000  |
| 1483    | HIPK4    | 0 | 9434   | HIPK4        | 0 | chr19 | 45578500  |
| 1983    | HIPK4    | 0 | 8934   | HIPK4        | 0 | chr19 | 45579000  |
| -156778 | NMU      | 0 | 26993  | LOC644145    | 0 | chr4  | 56354000  |
| -157278 | NMU      | 0 | 26493  | LOC644145    | 0 | chr4  | 56354500  |
| -1303   | NBEAL2   | 0 | 535    | NRADDP       | 0 | chr3  | 47027500  |
| 951     | CBX4     | 0 | 5308   | CBX4         | 0 | chr17 | 75422500  |
| -14126  | DHX32    | 0 | 1097   | FANK1        | 0 | chr10 | 127574000 |
| -289865 | LPP      | 0 | 2456   | TPRG1        | 0 | chr3  | 190370000 |
| -43945  | TRIP4    | 0 | 171    | ZNF609       | 0 | chr15 | 62578500  |
| 329     | ZNF609   | 0 | 186319 | ZNF609       | 0 | chr15 | 62579000  |
| -527    | SLC13A4  | 0 | 894    | FAM180A      | 0 | chr7  | 135064000 |
| -1027   | SLC13A4  | 0 | 394    | FAM180A      | 0 | chr7  | 135064500 |
| -15298  | LY6E     | 0 | 1553   | C8orf31      | 0 | chr8  | 144190500 |
| 13526   | PPFIA3   | 0 | 18092  | PPFIA3       | 0 | chr19 | 54328000  |
| -954    | ANXA8L1  | 0 | 2226   | AM25G,FAM25C | 0 | chr10 | 46595000  |
| 4651    | FAM195A  | 0 | 1975   | FAM195A      | 0 | chr16 | 636500    |
| 5651    | FAM195A  | 0 | 975    | FAM195A      | 0 | chr16 | 637500    |
| 6151    | FAM195A  | 0 | 475    | FAM195A      | 0 | chr16 | 638000    |
| 15768   | PPP1R13L | 0 | 10947  | PPP1R13L     | 0 | chr19 | 50590500  |
| 16268   | PPP1R13L | 0 | 10447  | PPP1R13L     | 0 | chr19 | 50591000  |
| 1642    | NSA2     | 0 | 7990   | NSA2         | 0 | chr5  | 74100500  |
| -33695  | CDC25A   | 0 | 1365   | CAMP         | 0 | chr3  | 48238500  |
| -34195  | CDC25A   | 0 | 865    | CAMP         | 0 | chr3  | 48239000  |
| -143392 | FSTL1    | 0 | 1817   | NDUFB4       | 0 | chr3  | 121796000 |
| -1322   | CPSF3    | 0 | 120    | IAH1         | 0 | chr2  | 9532000   |
| -819    | TRA2A    | 0 | 51859  | CLK2P        | 0 | chr7  | 23539000  |
| -1319   | TRA2A    | 0 | 51359  | CLK2P        | 0 | chr7  | 23539500  |
| -176521 | GSG1L    | 0 | 33316  | XPO6         | 0 | chr16 | 27983500  |
| -190953 | NFIA     | 0 | 27306  | TM2D1        | 0 | chr1  | 61892000  |
| -191453 | NFIA     | 0 | 26806  | TM2D1        | 0 | chr1  | 61892500  |

|         |          |     |          |           |   |       |           |
|---------|----------|-----|----------|-----------|---|-------|-----------|
| -1640   | C19orf38 | 0   | 252      | CARM1     | 0 | chr19 | 10843000  |
| 33878   | ZFYVE28  | 0   | 115167   | ZFYVE28   | 0 | chr4  | 2275000   |
| 34378   | ZFYVE28  | 0   | 114667   | ZFYVE28   | 0 | chr4  | 2275500   |
| -79637  | NRXN2    | 0   | 3958     | RASGRP2   | 0 | chr11 | 64247000  |
| 9301    | SEMA4C   | 0   | 962      | SEMA4C    | 0 | chr2  | 96898500  |
| 9801    | SEMA4C   | 0   | 462      | SEMA4C    | 0 | chr2  | 96899000  |
| -60     | JMJD8    | 0   | 202      | WDR24     | 0 | chr16 | 674500    |
| -723    | CACNA1F  | 0   | 1384     | CCDC22    | 0 | chrX  | 48977500  |
| 10090   | ASTE1    | 0   | 2836     | ASTE1     | 0 | chr3  | 132225500 |
| 10590   | ASTE1    | 0   | 2336     | ASTE1     | 0 | chr3  | 132226000 |
| 99009   | MRPS27   | 0   | 1840     | MRPS27    | 0 | chr5  | 71650000  |
| 99509   | MRPS27   | 0   | 1340     | MRPS27    | 0 | chr5  | 71650500  |
| 100009  | MRPS27   | 0   | 840      | MRPS27    | 0 | chr5  | 71651000  |
| ---     | ---      | --- | 18686687 | GOLGA8C   | 0 | chr15 | 341000    |
| 8436    | ZNF517   | 0   | 1833     | ZNF517    | 0 | chr8  | 146003500 |
| 13284   | GET4     | 0   | 6597     | GET4      | 0 | chr7  | 896000    |
| -15496  | PEMT     | 0   | 88511    | RAI1      | 0 | chr17 | 17437000  |
| -15996  | PEMT     | 0   | 88011    | RAI1      | 0 | chr17 | 17437500  |
| 60296   | BRSK2    | 0   | 11904    | BRSK2     | 0 | chr11 | 1428000   |
| 113241  | KCNQ1    | 0   | 274416   | KCNQ1     | 0 | chr11 | 2552500   |
| 4964    | BSG      | 0   | 5993     | BSG       | 0 | chr19 | 528500    |
| 5464    | BSG      | 0   | 5493     | BSG       | 0 | chr19 | 529000    |
| -46845  | JDP2     | 0   | 2536     | BATF      | 0 | chr14 | 75056000  |
| -8943   | IWS1     | 0   | 347      | MYO7B     | 0 | chr2  | 128009500 |
| 153     | MYO7B    | 0   | 101773   | MYO7B     | 0 | chr2  | 128010000 |
| 12112   | FURIN    | 0   | 2691     | FURIN     | 0 | chr15 | 89225000  |
| 1413    | GAMT     | 0   | 3052     | GAMT      | 0 | chr19 | 1349500   |
| 13109   | FBXO24   | 0   | 1676     | FBXO24    | 0 | chr7  | 100035000 |
| 13609   | FBXO24   | 0   | 1176     | FBXO24    | 0 | chr7  | 100035500 |
| -15126  | DHX32    | 0   | 97       | FANK1     | 0 | chr10 | 127575000 |
| -114297 | ARGFXP2  | 0   | 307      | RHBDL3    | 0 | chr17 | 27617000  |
| -55235  | AGAP6    | 0   | 2189     | FAM21A    | 0 | chr10 | 51495500  |
| -13626  | C3orf10  | 0   | 818      | VHL       | 0 | chr3  | 10157500  |
| 13555   | TSPAN4   | 0   | 9116     | TSPAN4    | 0 | chr11 | 848000    |
| -30010  | ZNF367   | 0   | 1734     | HABP4     | 0 | chr9  | 98250500  |
| 20714   | C22orf9  | 0   | 27814    | C22orf9   | 0 | chr22 | 43987500  |
| 4864    | CT62     | 0   | 393      | CT62      | 0 | chr15 | 69194500  |
| -107    | CT62     | 0   | 25841    | THSD4     | 0 | chr15 | 69195000  |
| 1590    | C8orf82  | 0   | 1266     | C8orf82   | 0 | chr8  | 145724000 |
| 77869   | COL4A2   | 0   | 127874   | COL4A2    | 0 | chr13 | 109835500 |
| 78869   | COL4A2   | 0   | 126874   | COL4A2    | 0 | chr13 | 109836500 |
| 4627    | FGF17    | 0   | 1265     | FGF17     | 0 | chr8  | 21961000  |
| 5127    | FGF17    | 0   | 765      | FGF17     | 0 | chr8  | 21961500  |
| 27635   | AGRN     | 0   | 8355     | AGRN      | 0 | chr1  | 973000    |
| -172503 | LPHN1    | 0   | 2712     | CD97      | 0 | chr19 | 14350500  |
| -173003 | LPHN1    | 0   | 2212     | CD97      | 0 | chr19 | 14351000  |
| 181155  | KIAA1486 | 0   | 71978    | KIAA1486  | 0 | chr2  | 226155000 |
| 181655  | KIAA1486 | 0   | 71478    | KIAA1486  | 0 | chr2  | 226155500 |
| 23247   | ACCN2    | 0   | 2661     | ACCN2     | 0 | chr12 | 48761000  |
| 23747   | ACCN2    | 0   | 2161     | ACCN2     | 0 | chr12 | 48761500  |
| 6417    | NFIX     | 0   | 96610    | NFIX      | 0 | chr19 | 12974000  |
| 6917    | NFIX     | 0   | 96110    | NFIX      | 0 | chr19 | 12974500  |
| -316    | TP53I11  | 0   | 22528    | LOC221122 | 0 | chr11 | 44929500  |
| -40003  | KLRG2    | 0   | 213      | CLEC2L    | 0 | chr7  | 138859000 |
| 85730   | RAPGEF4  | 0   | 231366   | RAPGEF4   | 0 | chr2  | 173394500 |
| -80615  | C7orf33  | 0   | 2365     | CUL1      | 0 | chr7  | 148024500 |
| -81115  | C7orf33  | 0   | 1865     | CUL1      | 0 | chr7  | 148025000 |
| -81615  | C7orf33  | 0   | 1365     | CUL1      | 0 | chr7  | 148025500 |

|          |              |     |        |          |   |       |           |
|----------|--------------|-----|--------|----------|---|-------|-----------|
| 1456     | SLC25A6      | 0   | 4498   | SLC25A6  | 0 | chrX  | 1466500   |
| 529      | CWC25        | 0   | 23615  | CWC25    | 0 | chr17 | 34211500  |
| -2983    | AZU1         | 0   | 5984   | PRTN3    | 0 | chr19 | 786000    |
| -9310    | INF2         | 0   | 10078  | ADSSL1   | 0 | chr14 | 104251500 |
| -9810    | INF2         | 0   | 9578   | ADSSL1   | 0 | chr14 | 104252000 |
| -10310   | INF2         | 0   | 9078   | ADSSL1   | 0 | chr14 | 104252500 |
| 33634    | TMED8        | 0   | 1649   | TMED8    | 0 | chr14 | 76911500  |
| 349283   | JAZF1        | 0   | 962    | JAZF1    | 0 | chr7  | 28186000  |
| 3492     | PP14571      | 0   | 3790   | PP14571  | 0 | chr2  | 241041000 |
| 3992     | PP14571      | 0   | 3290   | PP14571  | 0 | chr2  | 241041500 |
| -65276   | RIC8B        | 0   | 1173   | C12orf23 | 0 | chr12 | 105872500 |
| 39027    | MUC5AC       | 0   | 73802  | MUC5AC   | 0 | chr11 | 1171500   |
| 40527    | MUC5AC       | 0   | 72302  | MUC5AC   | 0 | chr11 | 1173000   |
| 29192    | PLEC         | 0   | 31031  | PLEC     | 0 | chr8  | 145090500 |
| 11284    | NOTCH1       | 0   | 40059  | NOTCH1   | 0 | chr9  | 138520000 |
| -1832    | DAGLB        | 0   | 11236  | KDELRL2  | 0 | chr7  | 6456000   |
| 1712     | MAGEL2       | 0   | 768    | MAGEL2   | 0 | chr15 | 21441500  |
| 2212     | MAGEL2       | 0   | 268    | MAGEL2   | 0 | chr15 | 21442000  |
| -232     | MAGEL2       | 0   | 39146  | NDN      | 0 | chr15 | 21442500  |
| -732     | MAGEL2       | 0   | 38646  | NDN      | 0 | chr15 | 21443000  |
| 19392    | NACC1        | 0   | 3459   | NACC1    | 0 | chr19 | 13109500  |
| 19892    | NACC1        | 0   | 2959   | NACC1    | 0 | chr19 | 13110000  |
| 20392    | NACC1        | 0   | 2459   | NACC1    | 0 | chr19 | 13110500  |
| -674     | SYT8         | 0   | 808    | TNNI2    | 0 | chr11 | 1816000   |
| -1174    | SYT8         | 0   | 308    | TNNI2    | 0 | chr11 | 1816500   |
| -503     | LOC100144604 | 0   | 44682  | FAM174B  | 0 | chr15 | 90917000  |
| -1003    | LOC100144604 | 0   | 44182  | FAM174B  | 0 | chr15 | 90917500  |
| -27521   | IQGAP1       | 0   | 201    | CRTC3    | 0 | chr15 | 88874000  |
| 299      | CRTC3        | 0   | 115081 | CRTC3    | 0 | chr15 | 88874500  |
| 585      | KRT86        | 0   | 6714   | KRT86    | 0 | chr12 | 50982500  |
| -25822   | ASPG         | 0   | 312    | KIF26A   | 0 | chr14 | 103674500 |
| 1517     | TRIM46       | 0   | 9569   | TRIM46   | 0 | chr1  | 153414500 |
| 14366    | BAHCC1       | 0   | 45453  | BAHCC1   | 0 | chr17 | 77002500  |
| 14866    | BAHCC1       | 0   | 44953  | BAHCC1   | 0 | chr17 | 77003000  |
| 15366    | BAHCC1       | 0   | 44453  | BAHCC1   | 0 | chr17 | 77003500  |
| -11566   | CELA3B       | 0   | 735    | CELA3A   | 0 | chr1  | 22200000  |
| 543      | PNMA6A       | 0   | 2058   | PNMA6A   | 0 | chrX  | 151992000 |
| 2962     | TBX2         | 0   | 6609   | TBX2     | 0 | chr17 | 56835000  |
| 4447     | DDT          | 0   | 4019   | DDT      | 0 | chr22 | 22648000  |
| 4947     | DDT          | 0   | 3519   | DDT      | 0 | chr22 | 22648500  |
| 5447     | DDT          | 0   | 3019   | DDT      | 0 | chr22 | 22649000  |
| ---      | ---          | --- | 75551  | FAM20C   | 0 | chr7  | 212500    |
| ---      | ---          | --- | 75051  | FAM20C   | 0 | chr7  | 213000    |
| -12770   | EFHD1        | 0   | 1758   | GIGYF2   | 0 | chr2  | 233268500 |
| 20429    | TTLL12       | 0   | 51     | TTLL12   | 0 | chr22 | 41913000  |
| -2299    | MAFG         | 0   | 1995   | LOC92659 | 0 | chr17 | 77477000  |
| 1852     | INCA1        | 0   | 7629   | INCA1    | 0 | chr17 | 4834000   |
| 55296    | BRSK2        | 0   | 16904  | BRSK2    | 0 | chr11 | 1423000   |
| 55796    | BRSK2        | 0   | 16404  | BRSK2    | 0 | chr11 | 1423500   |
| -794     | FUT10        | 0   | 11226  | MAK16    | 0 | chr8  | 33451000  |
| -2683429 | TTY23B,TTY23 | 0   | 240691 | TTY15    | 0 | chrY  | 13043000  |
| -1595    | PEX11G       | 0   | 6944   | C19orf45 | 0 | chr19 | 7461500   |
| -2095    | PEX11G       | 0   | 6444   | C19orf45 | 0 | chr19 | 7462000   |
| -462     | UQCRB        | 0   | 3320   | MTERFD1  | 0 | chr8  | 97317500  |
| -40058   | POTEG        | 0   | 358953 | POTEM    | 0 | chr14 | 18695000  |
| -40558   | POTEG        | 0   | 358453 | POTEM    | 0 | chr14 | 18695500  |
| -60446   | RNMT         | 0   | 764    | MC5R     | 0 | chr18 | 13815000  |
| 8907     | C6orf208     | 0   | 3894   | C6orf208 | 0 | chr6  | 169941000 |

|          |           |   |        |            |   |       |           |
|----------|-----------|---|--------|------------|---|-------|-----------|
| -15515   | CBX8      | 0 | 20549  | CBX4       | 0 | chr17 | 75401000  |
| 224      | TMEM8A    | 0 | 10951  | TMEM8A     | 0 | chr16 | 361000    |
| -2023    | CD93      | 0 | 262372 | NXT1       | 0 | chr20 | 23017000  |
| 53       | PLA2G6    | 0 | 70207  | PLA2G6     | 0 | chr22 | 36837500  |
| 72369    | DIP2C     | 0 | 343108 | DIP2C      | 0 | chr10 | 382500    |
| -96065   | NBPF16    | 0 | 73909  | LOC645166  | 0 | chr1  | 147121000 |
| -96565   | NBPF16    | 0 | 73409  | LOC645166  | 0 | chr1  | 147121500 |
| -97065   | NBPF16    | 0 | 72909  | LOC645166  | 0 | chr1  | 147122000 |
| 218      | SPDYC     | 0 | 2764   | SPDYC      | 0 | chr11 | 64694500  |
| 4259     | CACNA1H   | 0 | 64273  | CACNA1H    | 0 | chr16 | 1147500   |
| -9561    | SCXA,SCXB | 0 | 13577  | HSF1       | 0 | chr8  | 145472500 |
| 59076    | CRTC1     | 0 | 39643  | CRTC1      | 0 | chr19 | 18714500  |
| 59576    | CRTC1     | 0 | 39143  | CRTC1      | 0 | chr19 | 18715000  |
| 192114   | SAMD4A    | 0 | 29095  | SAMD4A     | 0 | chr14 | 54296500  |
| -6827    | GMEB2     | 0 | 13004  | STMN3      | 0 | chr20 | 61728500  |
| 102606   | CELSR1    | 0 | 73731  | CELSR1     | 0 | chr22 | 45238000  |
| 103106   | CELSR1    | 0 | 73231  | CELSR1     | 0 | chr22 | 45238500  |
| 12571    | ANO9      | 0 | 11511  | ANO9       | 0 | chr11 | 420500    |
| 7468     | MYBPC3    | 0 | 13829  | MYBPC3     | 0 | chr11 | 47317000  |
| 22812    | AMZ1      | 0 | 13095  | AMZ1       | 0 | chr7  | 2708500   |
| 23312    | AMZ1      | 0 | 12595  | AMZ1       | 0 | chr7  | 2709000   |
| 1438     | PRR23B    | 0 | 458    | PRR23B     | 0 | chr3  | 140222000 |
| -932     | POLRMT    | 0 | 5425   | FGF22      | 0 | chr19 | 585500    |
| -1432    | POLRMT    | 0 | 4925   | FGF22      | 0 | chr19 | 586000    |
| -1932    | POLRMT    | 0 | 4425   | FGF22      | 0 | chr19 | 586500    |
| 9760     | WHSC2     | 0 | 16757  | WHSC2      | 0 | chr4  | 1964000   |
| 10260    | WHSC2     | 0 | 16257  | WHSC2      | 0 | chr4  | 1964500   |
| 8025     | CD72      | 0 | 424    | CD72       | 0 | chr9  | 35608000  |
| 12494    | ABCA2     | 0 | 9195   | ABCA2      | 0 | chr9  | 139034000 |
| 12994    | ABCA2     | 0 | 8695   | ABCA2      | 0 | chr9  | 139034500 |
| -21553   | FAM47E    | 0 | 1200   | STBD1      | 0 | chr4  | 77445500  |
| 500      | DPEP1     | 0 | 17340  | DPEP1      | 0 | chr16 | 88215000  |
| -27796   | C2orf27B  | 0 | 318138 | ANKRD30BL  | 0 | chr2  | 132303500 |
| 144602   | CELF2     | 0 | 174178 | CELF2      | 0 | chr10 | 11244500  |
| 145102   | CELF2     | 0 | 173678 | CELF2      | 0 | chr10 | 11245000  |
| 1232     | MOB2      | 0 | 293577 | MOB2       | 0 | chr11 | 1448500   |
| -85798   | SPESP1    | 0 | 48243  | NCRNA00277 | 0 | chr15 | 67112000  |
| -86298   | SPESP1    | 0 | 47743  | NCRNA00277 | 0 | chr15 | 67112500  |
| 32201    | THBS2     | 0 | 6062   | THBS2      | 0 | chr6  | 169390000 |
| 33201    | THBS2     | 0 | 5062   | THBS2      | 0 | chr6  | 169391000 |
| -701280  | TP53TG3   | 0 | 387802 | UBE2MP1    | 0 | chr16 | 33873500  |
| -1367171 | RNF144B   | 0 | 1595   | ID4        | 0 | chr6  | 19944000  |
| -4646    | TFAMP1    | 0 | 123132 | ELFN1      | 0 | chr7  | 1627500   |
| -32710   | OR5D16    | 0 | 10848  | SPRYD5     | 0 | chr11 | 55396500  |
| -33210   | OR5D16    | 0 | 10348  | SPRYD5     | 0 | chr11 | 55397000  |
| -9368    | KIAA0284  | 0 | 18731  | PLD4       | 0 | chr14 | 104443500 |
| -9868    | KIAA0284  | 0 | 18231  | PLD4       | 0 | chr14 | 104444000 |
| 82001    | JPH3      | 0 | 13262  | JPH3       | 0 | chr16 | 86276000  |
| 83001    | JPH3      | 0 | 12262  | JPH3       | 0 | chr16 | 86277000  |
| 88       | ZNF511    | 0 | 4156   | ZNF511     | 0 | chr10 | 134972500 |
| 932      | GIPC3     | 0 | 7038   | GIPC3      | 0 | chr19 | 3537500   |
| 1432     | GIPC3     | 0 | 6538   | GIPC3      | 0 | chr19 | 3538000   |
| 2534     | NFKBIA    | 0 | 711    | NFKBIA     | 0 | chr14 | 34943000  |
| -745     | C3orf67   | 0 | 698575 | FHIT       | 0 | chr3  | 59011500  |
| -1245    | C3orf67   | 0 | 698075 | FHIT       | 0 | chr3  | 59012000  |
| 176028   | COL5A1    | 0 | 27009  | COL5A1     | 0 | chr9  | 136849500 |
| 7065     | CLCN7     | 0 | 23086  | CLCN7      | 0 | chr16 | 1442000   |
| 1227     | LOC340508 | 0 | 5048   | LOC340508  | 0 | chr9  | 98879000  |

|          |           |   |        |           |   |       |           |
|----------|-----------|---|--------|-----------|---|-------|-----------|
| 586990   | PTPRN2    | 0 | 461743 | PTPRN2    | 0 | chr7  | 157611500 |
| 587490   | PTPRN2    | 0 | 461243 | PTPRN2    | 0 | chr7  | 157612000 |
| 1353     | TMC4      | 0 | 11756  | TMC4      | 0 | chr19 | 59357000  |
| 1853     | TMC4      | 0 | 11256  | TMC4      | 0 | chr19 | 59357500  |
| -131853  | TOP3B     | 0 | 130199 | VPREB1    | 0 | chr22 | 20799000  |
| -132353  | TOP3B     | 0 | 129699 | VPREB1    | 0 | chr22 | 20799500  |
| 66537    | PCNT      | 0 | 55110  | PCNT      | 0 | chr21 | 46635000  |
| -91505   | ANKRD30BL | 0 | 163116 | GPR39     | 0 | chr2  | 132727500 |
| -92005   | ANKRD30BL | 0 | 162616 | GPR39     | 0 | chr2  | 132728000 |
| -92505   | ANKRD30BL | 0 | 162116 | GPR39     | 0 | chr2  | 132728500 |
| 12135    | AGRN      | 0 | 23855  | AGRN      | 0 | chr1  | 957500    |
| 12635    | AGRN      | 0 | 23355  | AGRN      | 0 | chr1  | 958000    |
| 13135    | AGRN      | 0 | 22855  | AGRN      | 0 | chr1  | 958500    |
| 13635    | AGRN      | 0 | 22355  | AGRN      | 0 | chr1  | 959000    |
| 5552     | TNRC18    | 0 | 111203 | TNRC18    | 0 | chr7  | 5318500   |
| -268     | LCN10     | 0 | 790    | LCN6      | 0 | chr9  | 138757500 |
| 1210     | LCN6      | 0 | 3301   | LCN6      | 0 | chr9  | 138759500 |
| 144099   | ANK1      | 0 | 99437  | ANK1      | 0 | chr8  | 41774000  |
| -19922   | TAB1      | 0 | 270    | MGAT3     | 0 | chr22 | 38183000  |
| 11621    | ABCA3     | 0 | 53248  | ABCA3     | 0 | chr16 | 2277500   |
| 12121    | ABCA3     | 0 | 52748  | ABCA3     | 0 | chr16 | 2278000   |
| 12621    | ABCA3     | 0 | 52248  | ABCA3     | 0 | chr16 | 2278500   |
| 8895     | LTBP3     | 0 | 10506  | LTBP3     | 0 | chr11 | 65071500  |
| -1639351 | EDEM1     | 0 | 1926   | GRM7      | 0 | chr3  | 6876000   |
| -1639851 | EDEM1     | 0 | 1426   | GRM7      | 0 | chr3  | 6876500   |
| -31236   | STX2      | 0 | 1569   | RAN       | 0 | chr12 | 129921000 |
| -31736   | STX2      | 0 | 1069   | RAN       | 0 | chr12 | 129921500 |
| 39541    | SNPH      | 0 | 3471   | SNPH      | 0 | chr20 | 1234500   |
| 7931     | RHBDF2    | 0 | 22603  | RHBDF2    | 0 | chr17 | 71986500  |
| 2289     | RRP7B     | 0 | 6461   | RRP7B     | 0 | chr22 | 41301500  |
| 2789     | RRP7B     | 0 | 5961   | RRP7B     | 0 | chr22 | 41302000  |
| 24353    | TBC1D24   | 0 | 3989   | TBC1D24   | 0 | chr16 | 2489500   |
| 25353    | TBC1D24   | 0 | 2989   | TBC1D24   | 0 | chr16 | 2490500   |
| -36416   | TMEM121   | 0 | 350882 | KIAA0125  | 0 | chr14 | 105104000 |
| -36916   | TMEM121   | 0 | 350382 | KIAA0125  | 0 | chr14 | 105104500 |
| -32956   | ZSWIM4    | 0 | 11949  | NANOS3    | 0 | chr19 | 13837000  |
| 38742    | C20orf117 | 0 | 43690  | C20orf117 | 0 | chr20 | 34878000  |
| -31      | DUS1L     | 0 | 12502  | FASN      | 0 | chr17 | 77617000  |
| 118      | PACSIN1   | 0 | 68978  | PACSIN1   | 0 | chr6  | 34542000  |
| 6804     | MYH14     | 0 | 100113 | MYH14     | 0 | chr19 | 55405500  |
| 7304     | MYH14     | 0 | 99613  | MYH14     | 0 | chr19 | 55406000  |
| 46592    | TJP2      | 0 | 34440  | TJP2      | 0 | chr9  | 71025500  |
| 47092    | TJP2      | 0 | 33940  | TJP2      | 0 | chr9  | 71026000  |
| -240111  | BMS1      | 0 | 2022   | RET       | 0 | chr10 | 42890500  |
| 21677    | MUC6      | 0 | 2206   | MUC6      | 0 | chr11 | 1024500   |
| 22177    | MUC6      | 0 | 1706   | MUC6      | 0 | chr11 | 1025000   |
| -342753  | OPRK1     | 0 | 121167 | ATP6V1H   | 0 | chr8  | 54669500  |
| -343253  | OPRK1     | 0 | 120667 | ATP6V1H   | 0 | chr8  | 54670000  |
| 806      | ALKBH4    | 0 | 7793   | ALKBH4    | 0 | chr7  | 101884500 |
| 1806     | ALKBH4    | 0 | 6793   | ALKBH4    | 0 | chr7  | 101885500 |
| 66367    | PTPRF     | 0 | 26430  | PTPRF     | 0 | chr1  | 43835500  |
| 67367    | PTPRF     | 0 | 25430  | PTPRF     | 0 | chr1  | 43836500  |
| -3253    | FAM22F    | 0 | 42653  | HIATL1    | 0 | chr9  | 96134000  |
| -4253    | FAM22F    | 0 | 41653  | HIATL1    | 0 | chr9  | 96135000  |
| -3841    | ULK1      | 0 | 2241   | PUS1      | 0 | chr12 | 130977500 |
| -4841    | ULK1      | 0 | 1241   | PUS1      | 0 | chr12 | 130978500 |
| -24452   | C19orf34  | 0 | 6446   | BTBD2     | 0 | chr19 | 1930000   |
| -24952   | C19orf34  | 0 | 5946   | BTBD2     | 0 | chr19 | 1930500   |

|         |            |   |        |            |   |       |           |
|---------|------------|---|--------|------------|---|-------|-----------|
| -25452  | C19orf34   | 0 | 5446   | BTBD2      | 0 | chr19 | 1931000   |
| -16835  | DEFB130    | 0 | 755    | ZNF705D    | 0 | chr8  | 11983500  |
| -17335  | DEFB130    | 0 | 255    | ZNF705D    | 0 | chr8  | 11984000  |
| 2783    | KREMEN2    | 0 | 1382   | KREMEN2    | 0 | chr16 | 2957000   |
| 1625    | NCRNA00119 | 0 | 150240 | NCRNA00119 | 0 | chr3  | 133925500 |
| -376    | DDOST      | 0 | 2093   | KIF17      | 0 | chr1  | 20861000  |
| -22374  | APTX       | 0 | 1208   | DNAJA1     | 0 | chr9  | 33014000  |
| 1057    | C2CD4C     | 0 | 2670   | C2CD4C     | 0 | chr19 | 357500    |
| 3306    | CHRNA2     | 0 | 16230  | CHRNA2     | 0 | chr8  | 27376500  |
| -2129   | KIAA1267   | 0 | 120773 | LRRC37A    | 0 | chr17 | 41607500  |
| 30116   | DAB2IP     | 0 | 9753   | DAB2IP     | 0 | chr9  | 123575000 |
| -2152   | C16orf13   | 0 | 3349   | FAM195A    | 0 | chr16 | 628500    |
| -81     | ZNF423     | 0 | 198189 | TMEM188    | 0 | chr16 | 48418500  |
| -581    | ZNF423     | 0 | 197689 | TMEM188    | 0 | chr16 | 48419000  |
| 50819   | MARK4      | 0 | 2881   | MARK4      | 0 | chr19 | 50497500  |
| -4142   | ARMS2      | 0 | 30     | HTRA1      | 0 | chr10 | 124211000 |
| 45759   | CACNA1H    | 0 | 22773  | CACNA1H    | 0 | chr16 | 1189000   |
| 46259   | CACNA1H    | 0 | 22273  | CACNA1H    | 0 | chr16 | 1189500   |
| 20918   | SHE        | 0 | 1713   | SHE        | 0 | chr1  | 152739500 |
| -448    | OR2T11     | 0 | 10710  | OR2T35     | 0 | chr1  | 246857500 |
| -948    | OR2T11     | 0 | 10210  | OR2T35     | 0 | chr1  | 246858000 |
| -61789  | ATP8B4     | 0 | 1184   | SLC27A2    | 0 | chr15 | 48260500  |
| 311     | GNAS       | 0 | 71145  | GNAS       | 0 | chr20 | 56848500  |
| -64021  | SOX8       | 0 | 13084  | LOC146336  | 0 | chr16 | 1041000   |
| -19288  | PYY2       | 0 | 96     | PYY2       | 0 | chr17 | 23598500  |
| 9093    | AES        | 0 | 371    | AES        | 0 | chr19 | 3013000   |
| -25527  | PEG3AS     | 0 | 1581   | MIMT1      | 0 | chr19 | 62042500  |
| -26027  | PEG3AS     | 0 | 1081   | MIMT1      | 0 | chr19 | 62043000  |
| -369774 | ERICH1     | 0 | 395975 | DLGAP2     | 0 | chr8  | 1041000   |
| 27272   | TBCD       | 0 | 163851 | TBCD       | 0 | chr17 | 78330500  |
| -758    | SGCB       | 0 | 12349  | SPATA18    | 0 | chr4  | 52600000  |
| -14726  | SNORA21    | 0 | 2137   | LASP1      | 0 | chr17 | 34277500  |
| -15226  | SNORA21    | 0 | 1637   | LASP1      | 0 | chr17 | 34278000  |
| 312     | PTP4A3     | 0 | 9302   | PTP4A3     | 0 | chr8  | 142501500 |
| 4232    | ZNF598     | 0 | 7764   | ZNF598     | 0 | chr16 | 1992000   |
| 4732    | ZNF598     | 0 | 7264   | ZNF598     | 0 | chr16 | 1992500   |
| -10263  | NKTR       | 0 | 377    | ZBTB47     | 0 | chr3  | 42675500  |
| 7575    | GTPBP6     | 0 | 1887   | GTPBP6     | 0 | chrX  | 169000    |
| 8075    | GTPBP6     | 0 | 1387   | GTPBP6     | 0 | chrX  | 169500    |
| 2075    | GTPBP6     | 0 | 7387   | GTPBP6     | 0 | chrY  | 163500    |
| 2575    | GTPBP6     | 0 | 6887   | GTPBP6     | 0 | chrY  | 164000    |
| 3075    | GTPBP6     | 0 | 6387   | GTPBP6     | 0 | chrY  | 164500    |
| 4868    | SBNO2      | 0 | 19773  | SBNO2      | 0 | chr19 | 1063500   |
| 1205    | TRHDE      | 0 | 391688 | TRHDE      | 0 | chr12 | 70954000  |
| -97     | ADAM6      | 0 | 499999 | NCRNA00221 | 0 | chr14 | 105509500 |
| -117445 | PRSS48     | 0 | 347    | FAM160A1   | 0 | chr4  | 152549500 |
| 23867   | PTPRU      | 0 | 66403  | PTPRU      | 0 | chr1  | 29459500  |
| 24367   | PTPRU      | 0 | 65903  | PTPRU      | 0 | chr1  | 29460000  |
| 47525   | DLGAP2     | 0 | 159549 | DLGAP2     | 0 | chr8  | 1484500   |
| 48025   | DLGAP2     | 0 | 159049 | DLGAP2     | 0 | chr8  | 1485000   |
| 38188   | KIF26A     | 0 | 3988   | KIF26A     | 0 | chr14 | 103713000 |
| 38688   | KIF26A     | 0 | 3488   | KIF26A     | 0 | chr14 | 103713500 |
| 1358    | RPL15      | 0 | 2336   | RPL15      | 0 | chr3  | 23935000  |
| 1858    | RPL15      | 0 | 1836   | RPL15      | 0 | chr3  | 23935500  |
| -1889   | TH         | 0 | 94803  | ASCL2      | 0 | chr11 | 2151500   |
| -62058  | SEPT7      | 0 | 185860 | EEPD1      | 0 | chr7  | 35973500  |
| -62558  | SEPT7      | 0 | 185360 | EEPD1      | 0 | chr7  | 35974000  |
| -75259  | GSG2       | 0 | 9208   | C17orf85   | 0 | chr17 | 3652000   |



|          |           |   |         |           |   |       |           |
|----------|-----------|---|---------|-----------|---|-------|-----------|
| -1106    | DNAJB6    | 0 | 120510  | PTPRN2    | 0 | chr7  | 156904000 |
| -1606    | DNAJB6    | 0 | 120010  | PTPRN2    | 0 | chr7  | 156904500 |
| 13759    | SLCO4A1   | 0 | 16092   | SLCO4A1   | 0 | chr20 | 60758000  |
| -4318    | SNRNP70   | 0 | 1429    | LIN7B     | 0 | chr19 | 54308000  |
| 1604     | CYB561    | 0 | 6939    | CYB561    | 0 | chr17 | 58865000  |
| -739     | SNORD42B  | 0 | 1226    | SNORD4A   | 0 | chr17 | 24072500  |
| -1239    | SNORD42B  | 0 | 726     | SNORD4A   | 0 | chr17 | 24073000  |
| -1537    | NPTXR     | 0 | 18693   | CBX6      | 0 | chr22 | 37571500  |
| -28851   | ERF       | 0 | 656     | CIC       | 0 | chr19 | 47480000  |
| -2242    | ZC3H18    | 0 | 4501    | IL17C     | 0 | chr16 | 87228000  |
| 2174     | SIK1      | 0 | 10430   | SIK1      | 0 | chr21 | 43661000  |
| 2674     | SIK1      | 0 | 9930    | SIK1      | 0 | chr21 | 43661500  |
| 4546     | NFKBIB    | 0 | 4374    | NFKBIB    | 0 | chr19 | 44087000  |
| 5046     | NFKBIB    | 0 | 3874    | NFKBIB    | 0 | chr19 | 44087500  |
| 18780    | DGKZ      | 0 | 180     | DGKZ      | 0 | chr11 | 46358500  |
| 7142     | COL9A3    | 0 | 16956   | COL9A3    | 0 | chr20 | 60926000  |
| -1005491 | PTPRD     | 0 | 1075385 | TYRP1     | 0 | chr9  | 11608000  |
| -1005991 | PTPRD     | 0 | 1074885 | TYRP1     | 0 | chr9  | 11608500  |
| -2167    | AKAP8L    | 0 | 317     | WIZ       | 0 | chr19 | 15393000  |
| -97386   | ZFATAS    | 0 | 536055  | LOC286094 | 0 | chr8  | 135779500 |
| -97886   | ZFATAS    | 0 | 535555  | LOC286094 | 0 | chr8  | 135780000 |
| 5781     | PTK6      | 0 | 3151    | PTK6      | 0 | chr20 | 61636000  |
| -5689    | PCDH12    | 0 | 2120    | RNF14     | 0 | chr5  | 141324500 |
| -6189    | PCDH12    | 0 | 1620    | RNF14     | 0 | chr5  | 141325000 |
| 7204     | LRFN1     | 0 | 1316    | LRFN1     | 0 | chr19 | 44496500  |
| -1754031 | PCDH9     | 0 | 716226  | KLHL1     | 0 | chr13 | 68456500  |
| -1754531 | PCDH9     | 0 | 715726  | KLHL1     | 0 | chr13 | 68457000  |
| -7358    | MIDN      | 0 | 970     | C19orf23  | 0 | chr19 | 1217500   |
| 6827     | SLC22A11  | 0 | 9075    | SLC22A11  | 0 | chr11 | 64086500  |
| 26       | SNORA64   | 0 | 108     | SNORA64   | 0 | chr16 | 1953000   |
| 89024    | EFR3B     | 0 | 28008   | EFR3B     | 0 | chr2  | 25207500  |
| 89524    | EFR3B     | 0 | 27508   | EFR3B     | 0 | chr2  | 25208000  |
| -440     | CTCF      | 0 | 35542   | PCK1      | 0 | chr20 | 55534000  |
| -940     | CTCF      | 0 | 35042   | PCK1      | 0 | chr20 | 55534500  |
| -1440    | CTCF      | 0 | 34542   | PCK1      | 0 | chr20 | 55535000  |
| -1940    | CTCF      | 0 | 34042   | PCK1      | 0 | chr20 | 55535500  |
| -2440    | CTCF      | 0 | 33542   | PCK1      | 0 | chr20 | 55536000  |
| -523966  | RHOU      | 0 | 501     | RAB4A     | 0 | chr1  | 227473000 |
| 8400     | ITGB1BP3  | 0 | 914     | ITGB1BP3  | 0 | chr19 | 3892500   |
| -114     | GFPT1     | 0 | 8756    | NFU1      | 0 | chr2  | 69468000  |
| -614     | GFPT1     | 0 | 8256    | NFU1      | 0 | chr2  | 69468500  |
| -27804   | C12orf74  | 0 | 395     | PLEKHG7   | 0 | chr12 | 91654000  |
| 105      | PLEKHG7   | 0 | 35499   | PLEKHG7   | 0 | chr12 | 91654500  |
| 111614   | C10orf92  | 0 | 7489    | C10orf92  | 0 | chr10 | 134583500 |
| -240181  | UST       | 0 | 755     | TAB2      | 0 | chr6  | 149680000 |
| -33306   | CDH4      | 0 | 4248    | TAF4      | 0 | chr20 | 59979000  |
| 949490   | PTPRN2    | 0 | 99243   | PTPRN2    | 0 | chr7  | 157974000 |
| 949990   | PTPRN2    | 0 | 98743   | PTPRN2    | 0 | chr7  | 157974500 |
| 2852     | SMCR7     | 0 | 1820    | SMCR7     | 0 | chr17 | 18108000  |
| -168325  | SPSB1     | 0 | 1614    | SLC25A33  | 0 | chr1  | 9520500   |
| -2057    | ISYNA1    | 0 | 2473    | ELL       | 0 | chr19 | 18412000  |
| -57490   | TPPP      | 0 | 44719   | ZDHHC11   | 0 | chr5  | 804000    |
| -193203  | C21orf131 | 0 | 2003    | NCAM2     | 0 | chr21 | 21290500  |
| -193703  | C21orf131 | 0 | 1503    | NCAM2     | 0 | chr21 | 21291000  |
| -17271   | NADSYN1   | 0 | 8460    | KRTAP5-7  | 0 | chr11 | 70907500  |
| -1786    | FAM131C   | 0 | 48918   | EPHA2     | 0 | chr1  | 16274500  |
| 16242    | C20orf117 | 0 | 66190   | C20orf117 | 0 | chr20 | 34855500  |
| 16742    | C20orf117 | 0 | 65690   | C20orf117 | 0 | chr20 | 34856000  |

|         |           |     |         |           |   |       |           |
|---------|-----------|-----|---------|-----------|---|-------|-----------|
| 5936    | DIRAS1    | 0   | 890     | DIRAS1    | 0 | chr19 | 2671500   |
| 6436    | DIRAS1    | 0   | 390     | DIRAS1    | 0 | chr19 | 2672000   |
| -29447  | BSND      | 0   | 1307    | PCSK9     | 0 | chr1  | 55276500  |
| -29947  | BSND      | 0   | 807     | PCSK9     | 0 | chr1  | 55277000  |
| -559    | C1QL2     | 0   | 64353   | STEAP3    | 0 | chr2  | 119633500 |
| -24121  | PTPLA     | 0   | 2629    | STAM      | 0 | chr10 | 17723500  |
| -59955  | SPAG6     | 0   | 57271   | PIP4K2A   | 0 | chr10 | 22806500  |
| 47241   | PAK4      | 0   | 6386    | PAK4      | 0 | chr19 | 44355500  |
| -274779 | ABHD5     | 0   | 244381  | C3orf77   | 0 | chr3  | 44014000  |
| -275279 | ABHD5     | 0   | 243881  | C3orf77   | 0 | chr3  | 44014500  |
| -1829   | RPS6KA3   | 0   | 1106400 | CNKSR2    | 0 | chrX  | 20196500  |
| 1048    | E2F1      | 0   | 9871    | E2F1      | 0 | chr20 | 31728000  |
| -73337  | LOC286135 | 0   | 36172   | TMEM66    | 0 | chr8  | 30004000  |
| 4410    | FAM83H    | 0   | 5402    | FAM83H    | 0 | chr8  | 144882500 |
| -279572 | LOC116437 | 0   | 218587  | SFRS8     | 0 | chr12 | 130543000 |
| -280072 | LOC116437 | 0   | 218087  | SFRS8     | 0 | chr12 | 130543500 |
| -74403  | VWF       | 0   | 1315    | CD9       | 0 | chr12 | 6178500   |
| 1185    | PITPNM1   | 0   | 12419   | PITPNM1   | 0 | chr11 | 67017000  |
| 1685    | PITPNM1   | 0   | 11919   | PITPNM1   | 0 | chr11 | 67017500  |
| 2185    | PITPNM1   | 0   | 11419   | PITPNM1   | 0 | chr11 | 67018000  |
| -1478   | LDB2      | 0   | 586117  | QDPR      | 0 | chr4  | 16511000  |
| -1222   | C9orf100  | 0   | 7414    | CA9       | 0 | chr9  | 35656500  |
| 17696   | DAZL      | 0   | 1010    | DAZL      | 0 | chr3  | 16621000  |
| 172047  | MAD1L1    | 0   | 245109  | MAD1L1    | 0 | chr7  | 1994000   |
| -19502  | NARFL     | 0   | 633     | MSLN      | 0 | chr16 | 750500    |
| 17748   | GPSM1     | 0   | 14378   | GPSM1     | 0 | chr9  | 138359500 |
| 241     | PPCS      | 0   | 3673    | PPCS      | 0 | chr1  | 42695000  |
| 20915   | GRAMD1A   | 0   | 5213    | GRAMD1A   | 0 | chr19 | 40204000  |
| 21415   | GRAMD1A   | 0   | 4713    | GRAMD1A   | 0 | chr19 | 40204500  |
| ---     | ---       | --- | 39331   | POTEH     | 0 | chr22 | 14597000  |
| ---     | ---       | --- | 38831   | POTEH     | 0 | chr22 | 14597500  |
| 1606    | GCK       | 0   | 43547   | GCK       | 0 | chr7  | 44152000  |
| 74903   | METT10D   | 0   | 20950   | METT10D   | 0 | chr17 | 2341000   |
| 34605   | FAM193B   | 0   | 144     | FAM193B   | 0 | chr5  | 176914000 |
| -28859  | H19       | 0   | 102422  | IGF2      | 0 | chr11 | 2004500   |
| -29359  | H19       | 0   | 101922  | IGF2      | 0 | chr11 | 2005000   |
| -2365   | EPB41L1   | 0   | 1360    | C20orf4   | 0 | chr20 | 34286500  |
| 6691    | EEF1A2    | 0   | 4449    | EEF1A2    | 0 | chr20 | 61596500  |
| -203169 | FOXF2     | 0   | 11679   | FOXC1     | 0 | chr6  | 1544000   |
| -203669 | FOXF2     | 0   | 11179   | FOXC1     | 0 | chr6  | 1544500   |
| -337    | TAF1C     | 0   | 3723    | ADAD2     | 0 | chr16 | 82778500  |
| -837    | TAF1C     | 0   | 3223    | ADAD2     | 0 | chr16 | 82779000  |
| -5684   | ZFP2      | 0   | 2329    | ZNF454    | 0 | chr5  | 178298500 |
| -6184   | ZFP2      | 0   | 1829    | ZNF454    | 0 | chr5  | 178299000 |
| 14510   | TSC2      | 0   | 26214   | TSC2      | 0 | chr16 | 2052500   |
| -23039  | GPR133    | 0   | 508     | LOC116437 | 0 | chr12 | 130215000 |
| -23539  | GPR133    | 0   | 8       | LOC116437 | 0 | chr12 | 130215500 |
| 16199   | PRDM12    | 0   | 2205    | PRDM12    | 0 | chr9  | 132546000 |
| 16699   | PRDM12    | 0   | 1705    | PRDM12    | 0 | chr9  | 132546500 |
| -134    | ANKRD16   | 0   | 219     | FBXO18    | 0 | chr10 | 5972000   |
| -11372  | CASP10    | 0   | 410     | CASP8     | 0 | chr2  | 201806000 |
| -56710  | PMS2L5    | 0   | 518     | GATSL1    | 0 | chr7  | 74016500  |
| 418     | APOC2     | 0   | 3158    | APOC2     | 0 | chr19 | 50141500  |
| 16215   | MYO1G     | 0   | 193     | MYO1G     | 0 | chr7  | 44985000  |
| 217663  | VAV2      | 0   | 12767   | VAV2      | 0 | chr9  | 135834500 |
| 19129   | TMEM27    | 0   | 18575   | TMEM27    | 0 | chrX  | 15574500  |
| 19629   | TMEM27    | 0   | 18075   | TMEM27    | 0 | chrX  | 15575000  |
| 9031    | MKMK2     | 0   | 4743    | MKMK2     | 0 | chr19 | 1997500   |

|         |           |   |        |           |   |       |           |
|---------|-----------|---|--------|-----------|---|-------|-----------|
| 7590    | ADAM8     | 0 | 6862   | ADAM8     | 0 | chr10 | 134933500 |
| 8090    | ADAM8     | 0 | 6362   | ADAM8     | 0 | chr10 | 134934000 |
| -268131 | LOC643955 | 0 | 635015 | ZNF735    | 0 | chr7  | 62670000  |
| -13736  | OR2C3     | 0 | 1573   | C1orf150  | 0 | chr1  | 245777500 |
| -14236  | OR2C3     | 0 | 1073   | C1orf150  | 0 | chr1  | 245778000 |
| 1825    | TIMM17B   | 0 | 2870   | TIMM17B   | 0 | chrX  | 48637500  |
| 2325    | TIMM17B   | 0 | 2370   | TIMM17B   | 0 | chrX  | 48638000  |
| 32959   | LPCAT1    | 0 | 29576  | LPCAT1    | 0 | chr5  | 1547500   |
| 33459   | LPCAT1    | 0 | 29076  | LPCAT1    | 0 | chr5  | 1548000   |
| 282     | PPP1R3G   | 0 | 1454   | PPP1R3G   | 0 | chr6  | 5031000   |
| 782     | PPP1R3G   | 0 | 954    | PPP1R3G   | 0 | chr6  | 5031500   |
| 26      | FAM108A1  | 0 | 8518   | FAM108A1  | 0 | chr19 | 1828000   |
| 10909   | AHNAK     | 0 | 102408 | AHNAK     | 0 | chr11 | 61968500  |
| -39550  | RABGAP1L  | 0 | 1693   | CACYBP    | 0 | chr1  | 173233500 |
| -40050  | RABGAP1L  | 0 | 1193   | CACYBP    | 0 | chr1  | 173234000 |
| 21358   | GALNS     | 0 | 21875  | GALNS     | 0 | chr16 | 87429000  |
| -35044  | SNORA77   | 0 | 406    | LAX1      | 0 | chr1  | 202000500 |
| 94      | LAX1      | 0 | 11101  | LAX1      | 0 | chr1  | 202001000 |
| -5420   | MXD1      | 0 | 11727  | ASPRV1    | 0 | chr2  | 70029000  |
| -5920   | MXD1      | 0 | 11227  | ASPRV1    | 0 | chr2  | 70029500  |
| -5326   | ARHGAP11A | 0 | 161    | SCG5      | 0 | chr15 | 30721000  |
| 577454  | MCTP1     | 0 | 535    | MCTP1     | 0 | chr5  | 94645500  |
| -17604  | MYOC      | 0 | 32782  | VAMP4     | 0 | chr1  | 169906000 |
| -18604  | MYOC      | 0 | 31782  | VAMP4     | 0 | chr1  | 169907000 |
| -7545   | PAX6      | 0 | 272052 | RCN1      | 0 | chr11 | 31797000  |
| 1669    | VPS37B    | 0 | 29165  | VPS37B    | 0 | chr12 | 121917500 |
| -18695  | PRPSAP2   | 0 | 2202   | SLC5A10   | 0 | chr17 | 18794000  |
| -29423  | SNORA23   | 0 | 2588   | ZNF143    | 0 | chr11 | 9436500   |
| -29982  | TUBB4Q    | 0 | 9516   | FRG2      | 0 | chr4  | 191173000 |
| 8016    | AEBP1     | 0 | 2184   | AEBP1     | 0 | chr7  | 44118500  |
| 8516    | AEBP1     | 0 | 1684   | AEBP1     | 0 | chr7  | 44119000  |
| 10164   | FAM9A     | 0 | 424    | FAM9A     | 0 | chrX  | 8729000   |
| -495    | HYI       | 0 | 76133  | PTPRF     | 0 | chr1  | 43693000  |
| -995    | HYI       | 0 | 75633  | PTPRF     | 0 | chr1  | 43693500  |
| -5960   | GOLGA8C   | 0 | 138890 | LOC646214 | 0 | chr15 | 19047000  |
| -2341   | LHB       | 0 | 3438   | CGB       | 0 | chr19 | 54214500  |
| 34      | KCNAB2    | 0 | 74110  | KCNAB2    | 0 | chr1  | 6009000   |
| 534     | KCNAB2    | 0 | 73610  | KCNAB2    | 0 | chr1  | 6009500   |
| 1932    | TNFRSF4   | 0 | 875    | TNFRSF4   | 0 | chr1  | 1138500   |
| 2432    | TNFRSF4   | 0 | 375    | TNFRSF4   | 0 | chr1  | 1139000   |
| -41026  | HDLBP     | 0 | 1395   | SEPT2     | 0 | chr2  | 241902000 |
| -31682  | C19orf21  | 0 | 1391   | PTBP1     | 0 | chr19 | 747000    |
| -2382   | ZNF644    | 0 | 236910 | HFM1      | 0 | chr1  | 91262000  |
| 5966    | PLXNB2    | 0 | 13836  | PLXNB2    | 0 | chr22 | 49061500  |
| -1819   | SRP14     | 0 | 46882  | BMF       | 0 | chr15 | 38120500  |
| -2319   | SRP14     | 0 | 46382  | BMF       | 0 | chr15 | 38121000  |
| -2413   | ARFGAP1   | 0 | 982    | COL20A1   | 0 | chr20 | 61394000  |
| -2913   | ARFGAP1   | 0 | 482    | COL20A1   | 0 | chr20 | 61394500  |
| 1043    | ISLR      | 0 | 1265   | ISLR      | 0 | chr15 | 72255000  |
| 5366    | LMF1      | 0 | 111985 | LMF1      | 0 | chr16 | 849000    |
| 150889  | PRUNE2    | 0 | 143823 | PRUNE2    | 0 | chr9  | 78567000  |
| 151389  | PRUNE2    | 0 | 143323 | PRUNE2    | 0 | chr9  | 78567500  |
| 5526    | ASGR1     | 0 | 607    | ASGR1     | 0 | chr17 | 7023000   |
| 150560  | KIAA1671  | 0 | 18913  | KIAA1671  | 0 | chr22 | 23904500  |
| 151060  | KIAA1671  | 0 | 18413  | KIAA1671  | 0 | chr22 | 23905000  |
| -5274   | TDRD7     | 0 | 22757  | TMOD1     | 0 | chr9  | 99303500  |
| -13337  | SNORA27   | 0 | 1463   | RASL11A   | 0 | chr13 | 26741000  |
| 130369  | COL4A2    | 0 | 75374  | COL4A2    | 0 | chr13 | 109888000 |

|          |              |   |         |              |   |       |           |
|----------|--------------|---|---------|--------------|---|-------|-----------|
| -1476416 | GALR1        | 0 | 253762  | SALL3        | 0 | chr18 | 74587500  |
| -1666    | SMYD3        | 0 | 121490  | TFB2M        | 0 | chr1  | 244649000 |
| -33476   | ZNF629       | 0 | 67116   | BCL7C        | 0 | chr16 | 30739500  |
| -33976   | ZNF629       | 0 | 66616   | BCL7C        | 0 | chr16 | 30740000  |
| -108222  | MC3R         | 0 | 889     | C20orf108    | 0 | chr20 | 54366500  |
| 23571    | IFT140       | 0 | 78110   | IFT140       | 0 | chr16 | 1524000   |
| 269      | TMEM204      | 0 | 20744   | TMEM204      | 0 | chr16 | 1524500   |
| 2284     | NOTCH1       | 0 | 49059   | NOTCH1       | 0 | chr9  | 138511000 |
| 2784     | NOTCH1       | 0 | 48559   | NOTCH1       | 0 | chr9  | 138511500 |
| 3390     | LOC100132215 | 0 | 350     | LOC100132215 | 0 | chr2  | 63128000  |
| -150     | LOC100132215 | 0 | 2968    | OTX1         | 0 | chr2  | 63128500  |
| -6930    | BREA2        | 0 | 10994   | MAPK15       | 0 | chr8  | 144859500 |
| -41457   | LOC440040    | 0 | 100550  | OR4C13       | 0 | chr11 | 49830000  |
| -154792  | FTH1         | 0 | 1520    | INCENP       | 0 | chr11 | 61646500  |
| -7991    | POM121L4P    | 0 | 1401    | TMEM191A     | 0 | chr22 | 19384000  |
| 31439    | ARHGEF7      | 0 | 120582  | ARHGEF7      | 0 | chr13 | 110635500 |
| 4791     | SLC6A19      | 0 | 18730   | SLC6A19      | 0 | chr5  | 1259500   |
| -828     | KDM5B        | 0 | 52504   | LOC148709    | 0 | chr1  | 201045000 |
| -32755   | C1QTNF8      | 0 | 24241   | CACNA1H      | 0 | chr16 | 1119000   |
| -33755   | C1QTNF8      | 0 | 23241   | CACNA1H      | 0 | chr16 | 1120000   |
| -11989   | HGFAC        | 0 | 1830    | DOK7         | 0 | chr4  | 3433000   |
| -12489   | HGFAC        | 0 | 1330    | DOK7         | 0 | chr4  | 3433500   |
| -2425    | HSPA12A      | 0 | 139795  | KIAA1598     | 0 | chr10 | 118494500 |
| -1107    | CT62         | 0 | 24841   | THSD4        | 0 | chr15 | 69196000  |
| -1607    | CT62         | 0 | 24341   | THSD4        | 0 | chr15 | 69196500  |
| 14901    | SEMA6B       | 0 | 1003    | SEMA6B       | 0 | chr19 | 4508500   |
| -1526    | TCERG1L      | 0 | 596449  | PPP2R2D      | 0 | chr10 | 133001500 |
| -2026    | TCERG1L      | 0 | 595949  | PPP2R2D      | 0 | chr10 | 133002000 |
| 8780     | MFI2         | 0 | 2083    | MFI2         | 0 | chr3  | 198239000 |
| 39329    | MAEA         | 0 | 10925   | MAEA         | 0 | chr4  | 1313000   |
| 1247     | CPSF1        | 0 | 15041   | CPSF1        | 0 | chr8  | 145590500 |
| -13180   | ZNF544       | 0 | 2129    | ZNF8         | 0 | chr19 | 63480000  |
| -13680   | ZNF544       | 0 | 1629    | ZNF8         | 0 | chr19 | 63480500  |
| 10447    | TMPRSS3      | 0 | 3769    | TMPRSS3      | 0 | chr21 | 42685500  |
| -31280   | ARHGAP28     | 0 | 11885   | LAMA1        | 0 | chr18 | 6920000   |
| 773      | SNRPN,SNURF  | 0 | 22822   | SNRPN,SNURF  | 0 | chr15 | 22752000  |
| 16334    | NLRP12       | 0 | 14460   | NLRP12       | 0 | chr19 | 59005000  |
| -9245    | CXADRP2      | 0 | 25752   | POTEB        | 0 | chr15 | 19279500  |
| -9745    | CXADRP2      | 0 | 25252   | POTEB        | 0 | chr15 | 19280000  |
| 497      | TMEM114      | 0 | 2227    | TMEM114      | 0 | chr16 | 8560000   |
| 250461   | GMDS         | 0 | 371345  | GMDS         | 0 | chr6  | 1819500   |
| 810      | REPIN1       | 0 | 2066    | REPIN1       | 0 | chr7  | 149700000 |
| 1310     | REPIN1       | 0 | 1566    | REPIN1       | 0 | chr7  | 149700500 |
| 155      | KCNA5        | 0 | 2710    | KCNA5        | 0 | chr12 | 5023500   |
| 87227    | CHST8        | 0 | 1754    | CHST8        | 0 | chr19 | 38954500  |
| -668     | PGBD3        | 0 | 84146   | CHAT         | 0 | chr10 | 50403000  |
| -27666   | PTPN2        | 0 | 35982   | SEH1L        | 0 | chr18 | 12902000  |
| -901042  | SVIP         | 0 | 766131  | LUZP2        | 0 | chr11 | 23709000  |
| 9819     | S1PR3        | 0 | 3745    | S1PR3        | 0 | chr9  | 90806000  |
| 6268     | RAB40B       | 0 | 35387   | RAB40B       | 0 | chr17 | 78214500  |
| 6768     | RAB40B       | 0 | 34887   | RAB40B       | 0 | chr17 | 78215000  |
| -7595    | SPATA5L1     | 0 | 1554    | C15orf48     | 0 | chr15 | 43508500  |
| -944     | RWDD2B       | 0 | 4308    | USP16        | 0 | chr21 | 29314500  |
| -466     | ID2          | 0 | 43937   | KIDINS220    | 0 | chr2  | 8742500   |
| -966     | ID2          | 0 | 43437   | KIDINS220    | 0 | chr2  | 8743000   |
| -1131    | ST8SIA4      | 0 | 1329590 | SLCO4C1      | 0 | chr5  | 100268000 |
| -14844   | NUDT16P1     | 0 | 1896    | NUDT16       | 0 | chr3  | 132581500 |
| -637     | SLC16A14     | 0 | 99389   | SP110        | 0 | chr2  | 230642500 |

|         |            |   |         |              |   |       |           |
|---------|------------|---|---------|--------------|---|-------|-----------|
| 62058   | NETO2      | 0 | 409     | NETO2        | 0 | chr16 | 45735000  |
| -3808   | ADSSL1     | 0 | 2014    | SIVA1        | 0 | chr14 | 104288500 |
| -4308   | ADSSL1     | 0 | 1514    | SIVA1        | 0 | chr14 | 104289000 |
| -611579 | NLGN4Y     | 0 | 2119934 | NCRNA00230B  | 0 | chrY  | 16076500  |
| -525    | B3GNTL1    | 0 | 27355   | METRNL       | 0 | chr17 | 78603500  |
| -1025   | B3GNTL1    | 0 | 26855   | METRNL       | 0 | chr17 | 78604000  |
| -1125   | SCMH1      | 0 | 235535  | EDN2         | 0 | chr1  | 41481500  |
| -2442   | FARSA      | 0 | 2413    | CALR         | 0 | chr19 | 12908000  |
| -2942   | FARSA      | 0 | 1913    | CALR         | 0 | chr19 | 12908500  |
| -5910   | DMRT1      | 0 | 1963    | DMRT3        | 0 | chr9  | 965000    |
| -6410   | DMRT1      | 0 | 1463    | DMRT3        | 0 | chr9  | 965500    |
| -21727  | SBNO2      | 0 | 51797   | STK11        | 0 | chr19 | 1105000   |
| -22227  | SBNO2      | 0 | 51297   | STK11        | 0 | chr19 | 1105500   |
| 33165   | SLA2       | 0 | 472     | SLA2         | 0 | chr20 | 34707500  |
| -1021   | GSG1L      | 0 | 208816  | XPO6         | 0 | chr16 | 27808000  |
| -1521   | GSG1L      | 0 | 208316  | XPO6         | 0 | chr16 | 27808500  |
| -4264   | PFKFB1     | 0 | 2004    | APEX2        | 0 | chrX  | 55041500  |
| -1638   | ADAM8      | 0 | 1127    | TUBGCP2      | 0 | chr10 | 134942000 |
| -53303  | IGFN1      | 0 | 1202    | PKP1         | 0 | chr1  | 199518000 |
| -616    | C6orf138   | 0 | 1361949 | MUT          | 0 | chr6  | 48145000  |
| -1116   | C6orf138   | 0 | 1361449 | MUT          | 0 | chr6  | 48145500  |
| -149173 | RASL11A    | 0 | 1680    | GTF3A        | 0 | chr13 | 26895000  |
| -25985  | OR2W5      | 0 | 6603    | LOC148824    | 0 | chr1  | 245748000 |
| -26485  | OR2W5      | 0 | 6103    | LOC148824    | 0 | chr1  | 245748500 |
| 10635   | ALDH3B1    | 0 | 8319    | ALDH3B1      | 0 | chr11 | 67545000  |
| 8109    | PTBP1      | 0 | 6827    | PTBP1        | 0 | chr19 | 756500    |
| 8609    | PTBP1      | 0 | 6327    | PTBP1        | 0 | chr19 | 757000    |
| -5118   | MYF6       | 0 | 2338    | MYF5         | 0 | chr12 | 79632500  |
| -94646  | TTY22      | 0 | 2906    | TTY23B,TTY23 | 0 | chrY  | 10355500  |
| -66633  | ENO1       | 0 | 508     | CA6          | 0 | chr1  | 8928000   |
| -67133  | ENO1       | 0 | 8       | CA6          | 0 | chr1  | 8928500   |
| -27136  | CXXC5      | 0 | 85589   | PSD2         | 0 | chr5  | 139070000 |
| 1333    | MEX3D      | 0 | 12057   | MEX3D        | 0 | chr19 | 1507000   |
| 25286   | GRAP       | 0 | 1061    | GRAP         | 0 | chr17 | 18890000  |
| 25786   | GRAP       | 0 | 561     | GRAP         | 0 | chr17 | 18890500  |
| -87     | NCRNA00175 | 0 | 30351   | COL18A1      | 0 | chr21 | 45669500  |
| -1087   | NCRNA00175 | 0 | 29351   | COL18A1      | 0 | chr21 | 45670500  |
| -1587   | NCRNA00175 | 0 | 28851   | COL18A1      | 0 | chr21 | 45671000  |
| -4594   | MAPK11     | 0 | 34      | PLXNB2       | 0 | chr22 | 49055500  |
| 466     | PLXNB2     | 0 | 19336   | PLXNB2       | 0 | chr22 | 49056000  |
| -1166   | TPD52L2    | 0 | 2461    | DNAJC5       | 0 | chr20 | 61994500  |
| 6340    | CSNK1G2    | 0 | 33836   | CSNK1G2      | 0 | chr19 | 1898500   |
| 6840    | CSNK1G2    | 0 | 33336   | CSNK1G2      | 0 | chr19 | 1899000   |
| 7962    | FAM9B      | 0 | 116     | FAM9B        | 0 | chrX  | 8961000   |
| -1617   | SNAI3      | 0 | 8409    | RNF166       | 0 | chr16 | 87282000  |
| 2060    | BRD1       | 0 | 49456   | BRD1         | 0 | chr22 | 48555000  |
| -103534 | TRH        | 0 | 363     | ALG1L2       | 0 | chr3  | 131283000 |
| 137     | ALG1L2     | 0 | 16422   | ALG1L2       | 0 | chr3  | 131283500 |
| 555     | SLC6A8     | 0 | 7742    | SLC6A8       | 0 | chrX  | 152607500 |
| 9177    | MGAT5B     | 0 | 68566   | MGAT5B       | 0 | chr17 | 72389500  |
| 9677    | MGAT5B     | 0 | 68066   | MGAT5B       | 0 | chr17 | 72390000  |
| 9756    | MYO15A     | 0 | 61341   | MYO15A       | 0 | chr17 | 17962500  |
| 10256   | MYO15A     | 0 | 60841   | MYO15A       | 0 | chr17 | 17963000  |
| 1128    | ZBTB12     | 0 | 1248    | ZBTB12       | 0 | chr6  | 31976500  |
| 1628    | ZBTB12     | 0 | 748     | ZBTB12       | 0 | chr6  | 31977000  |
| -263131 | LOC643955  | 0 | 640015  | ZNF735       | 0 | chr7  | 62665000  |
| -6774   | ERICH1     | 0 | 758975  | DLGAP2       | 0 | chr8  | 678000    |
| -1075   | ZNF541     | 0 | 51264   | GLTSCR1      | 0 | chr19 | 52752000  |

|         |              |     |         |                |   |       |           |
|---------|--------------|-----|---------|----------------|---|-------|-----------|
| -130491 | FAM27B       | 0   | 2080    | 0A3,ANKRD20A1  | 0 | chr9  | 67514500  |
| -155916 | TMEM121      | 0   | 231382  | KIAA0125       | 0 | chr14 | 105223500 |
| -102    | TSTD1        | 0   | 164     | USF1           | 0 | chr1  | 159275500 |
| 289     | INTS4L2      | 0   | 70567   | INTS4L2        | 0 | chr7  | 64750500  |
| -166916 | TMEM121      | 0   | 220382  | KIAA0125       | 0 | chr14 | 105234500 |
| -167416 | TMEM121      | 0   | 219882  | KIAA0125       | 0 | chr14 | 105235000 |
| -63716  | AP3B1        | 0   | 2094    | SCAMP1         | 0 | chr5  | 77690000  |
| -64216  | AP3B1        | 0   | 1594    | SCAMP1         | 0 | chr5  | 77690500  |
| -29999  | SLC1A4       | 0   | 2498    | CEP68          | 0 | chr2  | 65134500  |
| -30499  | SLC1A4       | 0   | 1998    | CEP68          | 0 | chr2  | 65135000  |
| 15972   | PITX2        | 0   | 3957    | PITX2          | 0 | chr4  | 111774000 |
| 16472   | PITX2        | 0   | 3457    | PITX2          | 0 | chr4  | 111774500 |
| 16972   | PITX2        | 0   | 2957    | PITX2          | 0 | chr4  | 111775000 |
| -8510   | AQP12B       | 0   | 434     | AQP12A         | 0 | chr2  | 241279500 |
| 12102   | GPR123       | 0   | 31669   | GPR123         | 0 | chr10 | 134763500 |
| 2333    | SIPA1        | 0   | 8467    | SIPA1          | 0 | chr11 | 65166500  |
| -123713 | ASAH1        | 0   | 1394    | NAT1           | 0 | chr8  | 18110500  |
| 7335    | LIMS3        | 0   | 689     | LIMS3          | 0 | chr2  | 110664500 |
| 29531   | PPP2R3B      | 0   | 23127   | PPP2R3B        | 0 | chrX  | 244500    |
| 8317    | BTBD12       | 0   | 22086   | BTBD12         | 0 | chr16 | 3579500   |
| 35678   | LOC100133669 | 0   | 682     | LOC100133669   | 0 | chr8  | 144170500 |
| -30810  | DUS3L        | 0   | 1817    | NRTN           | 0 | chr19 | 5773000   |
| 4564    | GRIN3B       | 0   | 4723    | GRIN3B         | 0 | chr19 | 956000    |
| -75800  | HERC2P2      | 0   | 356046  | MKRN3          | 0 | chr15 | 21005500  |
| -180429 | TTY23B,TTY23 | 0   | 2743691 | TTY15          | 0 | chrY  | 10540000  |
| -180929 | TTY23B,TTY23 | 0   | 2743191 | TTY15          | 0 | chrY  | 10540500  |
| -880405 | C13orf16     | 0   | 94913   | SOX1           | 0 | chr13 | 111675000 |
| -880905 | C13orf16     | 0   | 94413   | SOX1           | 0 | chr13 | 111675500 |
| -1664   | FEZ2         | 0   | 96917   | VIT            | 0 | chr2  | 36680500  |
| -2164   | FEZ2         | 0   | 96417   | VIT            | 0 | chr2  | 36681000  |
| ---     | ---          | --- | 99331   | POTEH          | 0 | chr22 | 14537000  |
| 8983    | LPPR3        | 0   | 452     | LPPR3          | 0 | chr19 | 772500    |
| 97845   | MCF2L        | 0   | 21363   | MCF2L          | 0 | chr13 | 112779500 |
| 37006   | TCF25        | 0   | 793     | TCF25          | 0 | chr16 | 88504500  |
| -10312  | ADAMTSL5     | 0   | 577     | PLK5P          | 0 | chr19 | 1474500   |
| -2846   | NKX2-1       | 0   | 57466   | NKX2-8         | 0 | chr14 | 36061500  |
| -3346   | NKX2-1       | 0   | 56966   | NKX2-8         | 0 | chr14 | 36062000  |
| 1574    | PCSK4        | 0   | 7407    | PCSK4          | 0 | chr19 | 1434000   |
| 7485    | MMP21        | 0   | 1880    | MMP21          | 0 | chr10 | 127452500 |
| -1107   | PLEKHM1      | 0   | 14892   | LRRRC37A4      | 0 | chr17 | 40925000  |
| 77548   | TTC15        | 0   | 22349   | TTC15          | 0 | chr2  | 3440000   |
| 78548   | TTC15        | 0   | 21349   | TTC15          | 0 | chr2  | 3441000   |
| -10480  | ZIC2         | 0   | 91837   | PCCA           | 0 | chr13 | 99447500  |
| -410650 | OR4A47       | 0   | 246262  | FOLH1          | 0 | chr11 | 48878500  |
| -411150 | OR4A47       | 0   | 245762  | FOLH1          | 0 | chr11 | 48879000  |
| -20807  | PLTP         | 0   | 1723    | PCIF1          | 0 | chr20 | 43995000  |
| 22495   | THOP1        | 0   | 5599    | THOP1          | 0 | chr19 | 2759000   |
| -35392  | RUFY4        | 0   | 490     | CXCR2          | 0 | chr2  | 218698500 |
| 10      | CXCR2        | 0   | 11220   | CXCR2          | 0 | chr2  | 218699000 |
| 116058  | BCOR         | 0   | 10026   | BCOR           | 0 | chrX  | 39911500  |
| 116558  | BCOR         | 0   | 9526    | BCOR           | 0 | chrX  | 39912000  |
| 9745    | LRIT1        | 0   | 197     | LRIT1          | 0 | chr10 | 85991000  |
| -85264  | DR1          | 0   | 426     | FNBP1L         | 0 | chr1  | 93686000  |
| -208129 | OR4F5        | 0   | 89521   | 6,OR4F29,OR4F3 | 0 | chr1  | 268000    |
| -208629 | OR4F5        | 0   | 89021   | 6,OR4F29,OR4F3 | 0 | chr1  | 268500    |
| -209129 | OR4F5        | 0   | 88521   | 6,OR4F29,OR4F3 | 0 | chr1  | 269000    |
| 538420  | NTM          | 0   | 427926  | NTM            | 0 | chr11 | 131284000 |
| 538920  | NTM          | 0   | 427426  | NTM            | 0 | chr11 | 131284500 |

|        |           |   |         |           |   |       |           |
|--------|-----------|---|---------|-----------|---|-------|-----------|
| 22512  | SLC12A7   | 0 | 39172   | SLC12A7   | 0 | chr5  | 1126000   |
| 23512  | SLC12A7   | 0 | 38172   | SLC12A7   | 0 | chr5  | 1127000   |
| -164   | PENK      | 0 | 511041  | IMPAD1    | 0 | chr8  | 57522000  |
| -664   | PENK      | 0 | 510541  | IMPAD1    | 0 | chr8  | 57522500  |
| 795    | NMT1      | 0 | 46908   | NMT1      | 0 | chr17 | 40495000  |
| 131795 | RHOBTB1   | 0 | 204     | RHOBTB1   | 0 | chr10 | 62431000  |
| -26293 | UPK1A     | 0 | 8169    | ZBTB32    | 0 | chr19 | 40887500  |
| -96035 | LOC728819 | 0 | 1685    | DYNC2LI1  | 0 | chr2  | 43853000  |
| -96535 | LOC728819 | 0 | 1185    | DYNC2LI1  | 0 | chr2  | 43853500  |
| -29698 | VAX1      | 0 | 29489   | KCNK18    | 0 | chr10 | 118917500 |
| -71005 | CTDP1     | 0 | 38155   | KCNG2     | 0 | chr18 | 75686500  |
| 2014   | TRIM39    | 0 | 14484   | TRIM39    | 0 | chr6  | 30405000  |
| -2421  | VAMP3     | 0 | 849     | PER3      | 0 | chr1  | 7766500   |
| 12708  | TCF3      | 0 | 28286   | TCF3      | 0 | chr19 | 1573000   |
| 17718  | WNT5A     | 0 | 3871    | WNT5A     | 0 | chr3  | 55492500  |
| -14078 | ZBTB1     | 0 | 1438    | HSPA2     | 0 | chr14 | 64075500  |
| 480    | EGLN2     | 0 | 7677    | EGLN2     | 0 | chr19 | 45998500  |
| 10281  | DBN1      | 0 | 6800    | DBN1      | 0 | chr5  | 176826500 |
| 10781  | DBN1      | 0 | 6300    | DBN1      | 0 | chr5  | 176827000 |
| 4599   | PNPLA2    | 0 | 1717    | PNPLA2    | 0 | chr11 | 813500    |
| 5099   | PNPLA2    | 0 | 1217    | PNPLA2    | 0 | chr11 | 814000    |
| 28722  | KCNJ4     | 0 | 149     | KCNJ4     | 0 | chr22 | 37181000  |
| 4442   | MPEG1     | 0 | 70      | MPEG1     | 0 | chr11 | 58737000  |
| 16208  | TCF3      | 0 | 24786   | TCF3      | 0 | chr19 | 1576500   |
| 7221   | MMRN2     | 0 | 14905   | MMRN2     | 0 | chr10 | 88692500  |
| -1258  | KTELC1    | 0 | 2557    | C3orf1    | 0 | chr3  | 120697500 |
| 287    | SPSB3     | 0 | 5582    | SPSB3     | 0 | chr16 | 1767000   |
| -158   | LOC728643 | 0 | 23989   | ANXA8     | 0 | chr10 | 46554000  |
| 111083 | VIT       | 0 | 6934    | VIT       | 0 | chr2  | 36888500  |
| 2755   | LMF2      | 0 | 1979    | LMF2      | 0 | chr22 | 49291000  |
| -14884 | C1QB      | 0 | 34417   | EPHB2     | 0 | chr1  | 22875500  |
| -15384 | C1QB      | 0 | 33917   | EPHB2     | 0 | chr1  | 22876000  |
| -15884 | C1QB      | 0 | 33417   | EPHB2     | 0 | chr1  | 22876500  |
| 16824  | TOLLIP    | 0 | 18415   | TOLLIP    | 0 | chr11 | 1269000   |
| 1071   | TMEM161A  | 0 | 17767   | TMEM161A  | 0 | chr19 | 19092500  |
| 1571   | TMEM161A  | 0 | 17267   | TMEM161A  | 0 | chr19 | 19093000  |
| -710   | LAGE3     | 0 | 3749    | UBL4A     | 0 | chrX  | 153361500 |
| 2070   | TSTA3     | 0 | 2875    | TSTA3     | 0 | chr8  | 144768000 |
| 8852   | INCA1     | 0 | 629     | INCA1     | 0 | chr17 | 4841000   |
| -26859 | HS6ST1    | 0 | 1577404 | LOC389033 | 0 | chr2  | 128819500 |
| -27359 | HS6ST1    | 0 | 1576904 | LOC389033 | 0 | chr2  | 128820000 |
| 19348  | ANKRD13B  | 0 | 1905    | ANKRD13B  | 0 | chr17 | 24964000  |
| -14749 | RAC2      | 0 | 23440   | CYTH4     | 0 | chr22 | 35985000  |
| -15249 | RAC2      | 0 | 22940   | CYTH4     | 0 | chr22 | 35985500  |
| -6002  | SLC25A6   | 0 | 2423    | ASMTLAS   | 0 | chrY  | 1477000   |
| -29    | GJD3      | 0 | 23821   | TOP2A     | 0 | chr17 | 35774500  |
| 798    | IFITM5    | 0 | 526     | IFITM5    | 0 | chr11 | 289000    |
| -48831 | ---       | 0 | 1717    | SFTPA1    | 0 | chr10 | 81039000  |
| -33162 | DEFB131   | 0 | 111     | LOC650293 | 0 | chr4  | 9094500   |
| 7238   | MED19     | 0 | 1249    | MED19     | 0 | chr11 | 57235000  |
| 30121  | PTP4A2    | 0 | 75      | PTP4A2    | 0 | chr1  | 32176500  |
| 2858   | GALNS     | 0 | 40375   | GALNS     | 0 | chr16 | 87410500  |
| 3358   | GALNS     | 0 | 39875   | GALNS     | 0 | chr16 | 87411000  |
| 7064   | GRIN3B    | 0 | 2223    | GRIN3B    | 0 | chr19 | 958500    |
| 3824   | CPNE7     | 0 | 17654   | CPNE7     | 0 | chr16 | 88173500  |
| 4324   | CPNE7     | 0 | 17154   | CPNE7     | 0 | chr16 | 88174000  |
| 4824   | CPNE7     | 0 | 16654   | CPNE7     | 0 | chr16 | 88174500  |
| 5324   | CPNE7     | 0 | 16154   | CPNE7     | 0 | chr16 | 88175000  |

|         |                   |   |        |                   |   |       |           |
|---------|-------------------|---|--------|-------------------|---|-------|-----------|
| 58445   | ARHGEF10          | 0 | 76214  | ARHGEF10          | 0 | chr8  | 1818000   |
| 4851    | C19orf6           | 0 | 6641   | C19orf6           | 0 | chr19 | 965500    |
| 37372   | WLS               | 0 | 69841  | WLS               | 0 | chr1  | 68401000  |
| 5183    | ARMC5             | 0 | 2989   | ARMC5             | 0 | chr16 | 31383000  |
| 5683    | ARMC5             | 0 | 2489   | ARMC5             | 0 | chr16 | 31383500  |
| -5015   | DEFB104B,DEFB104A | 0 | 2402   | DEFB104B,DEFB104A | 0 | chr8  | 7729000   |
| -5515   | DEFB104B,DEFB104A | 0 | 1902   | DEFB104B,DEFB104A | 0 | chr8  | 7729500   |
| 32724   | LONRF1            | 0 | 863    | LONRF1            | 0 | chr8  | 12656500  |
| 33224   | LONRF1            | 0 | 363    | LONRF1            | 0 | chr8  | 12657000  |
| 89428   | NFIC              | 0 | 7603   | NFIC              | 0 | chr19 | 3407000   |
| 89928   | NFIC              | 0 | 7103   | NFIC              | 0 | chr19 | 3407500   |
| 4031    | PPP2R3B           | 0 | 48627  | PPP2R3B           | 0 | chrX  | 219000    |
| -356    | RS1               | 0 | 18465  | PPEF1             | 0 | chrX  | 18600500  |
| -856    | RS1               | 0 | 17965  | PPEF1             | 0 | chrX  | 18601000  |
| 50146   | EIF4ENIF1         | 0 | 204    | EIF4ENIF1         | 0 | chr22 | 30215500  |
| 14699   | SLC35E2B          | 0 | 16603  | SLC35E2B          | 0 | chr1  | 1597500   |
| 15199   | SLC35E2B          | 0 | 16103  | SLC35E2B          | 0 | chr1  | 1598000   |
| 1371    | LYPD2             | 0 | 954    | LYPD2             | 0 | chr8  | 143830000 |
| 29531   | PPP2R3B           | 0 | 23127  | PPP2R3B           | 0 | chrY  | 244500    |
| 72      | PDLIM2            | 0 | 17483  | PDLIM2            | 0 | chr8  | 22494000  |
| -29380  | LOC728613         | 0 | 134998 | MRPL36            | 0 | chr5  | 1716500   |
| -29880  | LOC728613         | 0 | 134498 | MRPL36            | 0 | chr5  | 1717000   |
| -105169 | C8orf42           | 0 | 13699  | ERICH1            | 0 | chr8  | 590500    |
| 14667   | SLC9A3            | 0 | 36549  | SLC9A3            | 0 | chr5  | 541000    |
| 15167   | SLC9A3            | 0 | 36049  | SLC9A3            | 0 | chr5  | 541500    |
| 639     | C1orf83           | 0 | 45504  | C1orf83           | 0 | chr1  | 54292500  |
| 1139    | C1orf83           | 0 | 45004  | C1orf83           | 0 | chr1  | 54293000  |
| 517     | FLJ42627          | 0 | 6629   | FLJ42627          | 0 | chr16 | 2629500   |
| -70992  | SERPIND1          | 0 | 291    | SNAP29            | 0 | chr22 | 19543000  |
| 2959    | CRYGB             | 0 | 622    | CRYGB             | 0 | chr2  | 208718500 |
| 3459    | CRYGB             | 0 | 122    | CRYGB             | 0 | chr2  | 208719000 |
| -606    | RAB37             | 0 | 1357   | SLC9A3R1          | 0 | chr17 | 70255000  |
| 86037   | COL9A1            | 0 | 1007   | COL9A1            | 0 | chr6  | 71068500  |
| -292137 | PITX1             | 0 | 7969   | H2AFY             | 0 | chr5  | 134690000 |
| 7930    | CCDC9             | 0 | 7548   | CCDC9             | 0 | chr19 | 52459500  |
| 392     | KLF17             | 0 | 15896  | KLF17             | 0 | chr1  | 44357500  |
| -1234   | DIO3OS            | 0 | 4440   | DIO3              | 0 | chr14 | 101093000 |
| -1734   | DIO3OS            | 0 | 3940   | DIO3              | 0 | chr14 | 101093500 |
| 4168    | ---               | 0 | 590    | ---               | 0 | chr1  | 144791000 |
| 11566   | GRID2IP           | 0 | 43092  | GRID2IP           | 0 | chr7  | 6514500   |
| 12066   | GRID2IP           | 0 | 42592  | GRID2IP           | 0 | chr7  | 6515000   |
| 3053    | PRDM8             | 0 | 16006  | PRDM8             | 0 | chr4  | 81328500  |
| 3553    | PRDM8             | 0 | 15506  | PRDM8             | 0 | chr4  | 81329000  |
| 4053    | PRDM8             | 0 | 15006  | PRDM8             | 0 | chr4  | 81329500  |
| -470    | DBNDD1            | 0 | 12008  | GAS8              | 0 | chr16 | 88604500  |
| -970    | DBNDD1            | 0 | 11508  | GAS8              | 0 | chr16 | 88605000  |
| 71832   | EXD3              | 0 | 44535  | EXD3              | 0 | chr9  | 139393000 |
| 72332   | EXD3              | 0 | 44035  | EXD3              | 0 | chr9  | 139393500 |
| -15551  | OBP2B             | 0 | 30383  | ABO               | 0 | chr9  | 135090000 |
| 14772   | NDUFS2            | 0 | 308    | NDUFS2            | 0 | chr1  | 159450500 |
| -412013 | CDK20             | 0 | 1616   | SPIN1             | 0 | chr9  | 90191500  |
| -111482 | MUC16             | 0 | 420    | OR1M1             | 0 | chr19 | 9064500   |
| 58796   | BRSK2             | 0 | 13404  | BRSK2             | 0 | chr11 | 1426500   |
| -38796  | CTSL1             | 0 | 2649   | CTSL3             | 0 | chr9  | 89575000  |
| -390398 | IER5              | 0 | 2338   | CACNA1E           | 0 | chr1  | 179717000 |
| -24     | H2AFY             | 0 | 44302  | C5orf20           | 0 | chr5  | 134763500 |
| -6795   | DES               | 0 | 1443   | SPEG              | 0 | chr2  | 220006500 |
| -1622   | HDAC8             | 0 | 4388   | PHKA1             | 0 | chrX  | 71711000  |



|         |              |   |        |           |   |       |           |
|---------|--------------|---|--------|-----------|---|-------|-----------|
| -2122   | HDAC8        | 0 | 3888   | PHKA1     | 0 | chrX  | 71711500  |
| -22020  | SSH1         | 0 | 485    | DAO       | 0 | chr12 | 107797500 |
| 15      | DAO          | 0 | 20839  | DAO       | 0 | chr12 | 107798000 |
| 15192   | MUC4         | 0 | 49045  | MUC4      | 0 | chr3  | 196974500 |
| 15692   | MUC4         | 0 | 48545  | MUC4      | 0 | chr3  | 196975000 |
| 34443   | SGSM2        | 0 | 9098   | SGSM2     | 0 | chr17 | 2222000   |
| 17667   | SLC9A3       | 0 | 33549  | SLC9A3    | 0 | chr5  | 544000    |
| -4430   | VDAC3        | 0 | 6149   | SLC20A2   | 0 | chr8  | 42387000  |
| 1950    | ARHGAP27     | 0 | 10232  | ARHGAP27  | 0 | chr17 | 40829000  |
| 2450    | ARHGAP27     | 0 | 9732   | ARHGAP27  | 0 | chr17 | 40829500  |
| -1535   | FAM132A      | 0 | 5654   | UBE2J2    | 0 | chr1  | 1173500   |
| -10113  | RARS         | 0 | 159    | FBLL1     | 0 | chr5  | 167889000 |
| -1075   | TOP1MT       | 0 | 30668  | C8orf51   | 0 | chr8  | 144489500 |
| 86187   | NFATC1       | 0 | 42811  | NFATC1    | 0 | chr18 | 75347500  |
| -35005  | CTDP1        | 0 | 74155  | KCNG2     | 0 | chr18 | 75650500  |
| -35505  | CTDP1        | 0 | 73655  | KCNG2     | 0 | chr18 | 75651000  |
| 1443    | JMJD4        | 0 | 2735   | JMJD4     | 0 | chr1  | 225987000 |
| 1943    | JMJD4        | 0 | 2235   | JMJD4     | 0 | chr1  | 225987500 |
| -9595   | LOC100130776 | 0 | 7050   | TSPAN31   | 0 | chr12 | 56418000  |
| -10095  | LOC100130776 | 0 | 6550   | TSPAN31   | 0 | chr12 | 56418500  |
| -1379   | SNORA72      | 0 | 20925  | C8orf47   | 0 | chr8  | 99125000  |
| -152756 | MEIS3P1      | 0 | 2455   | ADORA2B   | 0 | chr17 | 15786500  |
| -7430   | LOC415056    | 0 | 19991  | C9orf23   | 0 | chr9  | 34580500  |
| -591    | DSCAM        | 0 | 293796 | C21orf130 | 0 | chr21 | 41141500  |
| 1394    | ARHGDIG      | 0 | 1004   | ARHGDIG   | 0 | chr16 | 272000    |
| 7301    | CHERP        | 0 | 17263  | CHERP     | 0 | chr19 | 16497000  |
| 7801    | CHERP        | 0 | 16763  | CHERP     | 0 | chr19 | 16497500  |
| 13541   | KDM6B        | 0 | 1343   | KDM6B     | 0 | chr17 | 7697500   |
| -157625 | HERC2P4      | 0 | 363341 | TP53TG3B  | 0 | chr16 | 32229000  |
| -158125 | HERC2P4      | 0 | 362841 | TP53TG3B  | 0 | chr16 | 32229500  |
| 2858    | ELAVL3       | 0 | 26803  | ELAVL3    | 0 | chr19 | 11426000  |
| 3358    | ELAVL3       | 0 | 26303  | ELAVL3    | 0 | chr19 | 11426500  |
| 4596    | RBPJL        | 0 | 6378   | RBPJL     | 0 | chr20 | 43373500  |
| 5096    | RBPJL        | 0 | 5878   | RBPJL     | 0 | chr20 | 43374000  |
| 5596    | RBPJL        | 0 | 5378   | RBPJL     | 0 | chr20 | 43374500  |
| -15797  | SPI1         | 0 | 14126  | SLC39A13  | 0 | chr11 | 47372500  |
| -16297  | SPI1         | 0 | 13626  | SLC39A13  | 0 | chr11 | 47373000  |
| -157441 | LOC100130238 | 0 | 52229  | FBRSL1    | 0 | chr12 | 131525000 |
| -157941 | LOC100130238 | 0 | 51729  | FBRSL1    | 0 | chr12 | 131525500 |
| 759     | HDAC10       | 0 | 5461   | HDAC10    | 0 | chr22 | 49026500  |
| 1259    | HDAC10       | 0 | 4961   | HDAC10    | 0 | chr22 | 49027000  |
| 1759    | HDAC10       | 0 | 4461   | HDAC10    | 0 | chr22 | 49027500  |
| 3088    | EHD2         | 0 | 26703  | EHD2      | 0 | chr19 | 52911500  |
| -520    | ERRFI1       | 0 | 297476 | SLC45A1   | 0 | chr1  | 8009500   |
| 456     | ZNF219       | 0 | 8148   | ZNF219    | 0 | chr14 | 20628500  |
| 1956    | ZNF219       | 0 | 6648   | ZNF219    | 0 | chr14 | 20630000  |
| 2456    | ZNF219       | 0 | 6148   | ZNF219    | 0 | chr14 | 20630500  |
| 1191159 | AUTS2        | 0 | 2821   | AUTS2     | 0 | chr7  | 69893000  |
| 1191659 | AUTS2        | 0 | 2321   | AUTS2     | 0 | chr7  | 69893500  |
| 75494   | SARDH        | 0 | 898    | SARDH     | 0 | chr9  | 135594000 |
| -46420  | HECW2        | 0 | 600    | CCDC150   | 0 | chr2  | 197212000 |
| -1070   | ANGPT1       | 0 | 400220 | RSPO2     | 0 | chr8  | 108580500 |
| 13485   | ZNF623       | 0 | 4043   | ZNF623    | 0 | chr8  | 144803000 |
| 404     | ZNF623       | 0 | 3543   | ZNF623    | 0 | chr8  | 144803500 |
| -1365   | PTPLAD2      | 0 | 44103  | IFNB1     | 0 | chr9  | 21023000  |
| -35666  | C14orf70     | 0 | 18505  | DLK1      | 0 | chr14 | 100244500 |
| -36666  | C14orf70     | 0 | 17505  | DLK1      | 0 | chr14 | 100245500 |
| -358    | CHRNB4       | 0 | 117599 | ADAMTS7   | 0 | chr15 | 76721000  |

|         |               |   |        |                |   |       |           |
|---------|---------------|---|--------|----------------|---|-------|-----------|
| -1461   | GDNF          | 0 | 417289 | EGFLAM         | 0 | chr5  | 37877000  |
| -1961   | GDNF          | 0 | 416789 | EGFLAM         | 0 | chr5  | 37877500  |
| -255    | CPPED1        | 0 | 97477  | SHISA9         | 0 | chr16 | 12805500  |
| -11867  | PRSS41        | 0 | 164    | PRSS21         | 0 | chr16 | 2807000   |
| 336     | PRSS21        | 0 | 4219   | PRSS21         | 0 | chr16 | 2807500   |
| 249995  | JARID2        | 0 | 25732  | JARID2         | 0 | chr6  | 15604500  |
| -129964 | PLAC4         | 0 | 1530   | FAM3B          | 0 | chr21 | 41609000  |
| -1740   | NXN           | 0 | 15606  | TIMM22         | 0 | chr17 | 831500    |
| -143    | PLD6          | 0 | 5751   | FLCN           | 0 | chr17 | 17050500  |
| 53421   | CORO2A        | 0 | 18277  | CORO2A         | 0 | chr9  | 99976500  |
| 2896    | C20orf166     | 0 | 17416  | C20orf166      | 0 | chr20 | 60561000  |
| -42665  | SPINK8        | 0 | 1212   | FBXW12         | 0 | chr3  | 48387500  |
| 927     | RER1          | 0 | 12734  | RER1           | 0 | chr1  | 2314000   |
| 1427    | RER1          | 0 | 12234  | RER1           | 0 | chr1  | 2314500   |
| -691    | PHPT1         | 0 | 639    | MAMDC4         | 0 | chr9  | 138866000 |
| 34730   | KCNQ4         | 0 | 19947  | KCNQ4          | 0 | chr1  | 41057000  |
| 23524   | SF3A1         | 0 | 1413   | SF3A1          | 0 | chr22 | 29081500  |
| -33613  | GTPBP6        | 0 | 10469  | PPP2R3B        | 0 | chrY  | 204500    |
| -34113  | GTPBP6        | 0 | 9969   | PPP2R3B        | 0 | chrY  | 205000    |
| -82358  | TMEM179       | 0 | 2487   | INF2           | 0 | chr14 | 104224500 |
| -82858  | TMEM179       | 0 | 1987   | INF2           | 0 | chr14 | 104225000 |
| -83358  | TMEM179       | 0 | 1487   | INF2           | 0 | chr14 | 104225500 |
| -149251 | LOC157627     | 0 | 1739   | MSRA           | 0 | chr8  | 9947500   |
| -17102  | CRX           | 0 | 10034  | SULT2A1        | 0 | chr19 | 53055500  |
| 6932    | LRRC45        | 0 | 816    | LRRC45         | 0 | chr17 | 77581500  |
| 10687   | NFATC1        | 0 | 118311 | NFATC1         | 0 | chr18 | 75272000  |
| -2087   | NDUFC2        | 0 | 18635  | ALG8           | 0 | chr11 | 77471000  |
| 21635   | AGRN          | 0 | 14355  | AGRN           | 0 | chr1  | 967000    |
| -15473  | RP11L1        | 0 | 2056   | C8orf74        | 0 | chr8  | 10565500  |
| 21691   | ATP2A1        | 0 | 4331   | ATP2A1         | 0 | chr16 | 28819000  |
| 22191   | ATP2A1        | 0 | 3831   | ATP2A1         | 0 | chr16 | 28819500  |
| -450138 | LOC285627     | 0 | 317    | ADRA1B         | 0 | chr5  | 159276000 |
| -292903 | ERBB4         | 0 | 168155 | IKZF2          | 0 | chr2  | 213404500 |
| -293403 | ERBB4         | 0 | 167655 | IKZF2          | 0 | chr2  | 213405000 |
| -520724 | MAP2K4        | 0 | 1431   | MYOCD          | 0 | chr17 | 12508500  |
| 38095   | PDXK          | 0 | 5116   | PDXK           | 0 | chr21 | 44001500  |
| 38595   | PDXK          | 0 | 4616   | PDXK           | 0 | chr21 | 44002000  |
| -4442   | FRG2C         | 0 | 65218  | ZNF717         | 0 | chr3  | 75803500  |
| -4942   | FRG2C         | 0 | 64718  | ZNF717         | 0 | chr3  | 75804000  |
| -5442   | FRG2C         | 0 | 64218  | ZNF717         | 0 | chr3  | 75804500  |
| -17674  | SCARNA6       | 0 | 1047   | SAG            | 0 | chr2  | 233880000 |
| 5396    | MAGEA9B,MAGEA | 0 | 411    | MAGEA9B,MAGEA9 | 0 | chrX  | 148476500 |
| -19069  | SNORA79       | 0 | 48661  | STON2          | 0 | chr14 | 80758000  |
| -47097  | PDGFB         | 0 | 20832  | RPL3           | 0 | chr22 | 38018000  |
| 37789   | PKD1          | 0 | 9400   | PKD1           | 0 | chr16 | 2116500   |
| 38289   | PKD1          | 0 | 8900   | PKD1           | 0 | chr16 | 2117000   |
| 38789   | PKD1          | 0 | 8400   | PKD1           | 0 | chr16 | 2117500   |
| 21992   | CARKD         | 0 | 2343   | CARKD          | 0 | chr13 | 110088000 |
| -5755   | C1QTNF8       | 0 | 51241  | CACNA1H        | 0 | chr16 | 1092000   |
| -6255   | C1QTNF8       | 0 | 50741  | CACNA1H        | 0 | chr16 | 1092500   |
| 18962   | ADCK5         | 0 | 1761   | ADCK5          | 0 | chr8  | 145587500 |
| 19462   | ADCK5         | 0 | 1261   | ADCK5          | 0 | chr8  | 145588000 |
| 2792    | ZBTB45        | 0 | 3233   | ZBTB45         | 0 | chr19 | 63719500  |
| 3292    | ZBTB45        | 0 | 2733   | ZBTB45         | 0 | chr19 | 63720000  |
| -239    | CYP11B2       | 0 | 138322 | LOC100133669   | 0 | chr8  | 143996500 |
| 51      | RGS14         | 0 | 14705  | RGS14          | 0 | chr5  | 176717500 |
| -510    | SNIP1         | 0 | 2106   | DNALI1         | 0 | chr1  | 37793000  |
| 20263   | CDC42BPG      | 0 | 117    | CDC42BPG       | 0 | chr11 | 64368500  |

|         |              |   |        |               |   |       |           |
|---------|--------------|---|--------|---------------|---|-------|-----------|
| -312575 | BANP         | 0 | 40379  | ZNF469        | 0 | chr16 | 86981000  |
| -361    | TREX2        | 0 | 817    | HAUS7         | 0 | chrX  | 152365500 |
| 869     | FLJ40434     | 0 | 781    | FLJ40434      | 0 | chr1  | 53677500  |
| 11784   | NOTCH1       | 0 | 39559  | NOTCH1        | 0 | chr9  | 138520500 |
| 835     | FAM179B      | 0 | 111384 | FAM179B       | 0 | chr14 | 44502000  |
| 9345    | KLHL30       | 0 | 2786   | KLHL30        | 0 | chr2  | 238723500 |
| 10345   | KLHL30       | 0 | 1786   | KLHL30        | 0 | chr2  | 238724500 |
| 515     | TAS2R5       | 0 | 635    | TAS2R5        | 0 | chr7  | 141137000 |
| 2897    | DMWD         | 0 | 6900   | DMWD          | 0 | chr19 | 50981000  |
| 20412   | FAM38A       | 0 | 818    | FAM38A        | 0 | chr16 | 87329500  |
| 20912   | FAM38A       | 0 | 318    | FAM38A        | 0 | chr16 | 87330000  |
| -182    | FAM38A       | 0 | 67186  | CDT1          | 0 | chr16 | 87330500  |
| -1992   | GGN          | 0 | 278    | SPRED3        | 0 | chr19 | 43572500  |
| -1426   | NCOA2        | 0 | 168226 | TRAM1         | 0 | chr8  | 71480000  |
| 7949    | SLC45A4      | 0 | 9855   | SLC45A4       | 0 | chr8  | 142298000 |
| 35570   | GNAS         | 0 | 22645  | GNAS          | 0 | chr20 | 56897000  |
| 216     | ZFAND3       | 0 | 334875 | ZFAND3        | 0 | chr6  | 37895500  |
| -5331   | C1QTNF9      | 0 | 93068  | PARP4         | 0 | chr13 | 23800000  |
| -5831   | C1QTNF9      | 0 | 92568  | PARP4         | 0 | chr13 | 23800500  |
| 71833   | ZNF536       | 0 | 113805 | ZNF536        | 0 | chr19 | 35627000  |
| 11036   | AJAP1        | 0 | 111714 | AJAP1         | 0 | chr1  | 4626000   |
| 11536   | AJAP1        | 0 | 111214 | AJAP1         | 0 | chr1  | 4626500   |
| -78553  | NGRN         | 0 | 1480   | ZNF774        | 0 | chr15 | 88695000  |
| -39163  | HSPG2        | 0 | 504    | CELA3B        | 0 | chr1  | 22175500  |
| 12259   | TRIM8        | 0 | 1566   | TRIM8         | 0 | chr10 | 104406500 |
| -3107   | GSTT2,GSTT2B | 0 | 2525   | DDTL          | 0 | chr22 | 22636500  |
| -3607   | GSTT2,GSTT2B | 0 | 2025   | DDTL          | 0 | chr22 | 22637000  |
| 7394    | LPPR2        | 0 | 2872   | LPPR2         | 0 | chr19 | 11334500  |
| -49971  | UBXN10       | 0 | 47498  | VWA5B1        | 0 | chr1  | 20442500  |
| -1564   | NCRNA00202   | 0 | 60550  | ANKRD26       | 0 | chr10 | 27272500  |
| 13495   | THOP1        | 0 | 14599  | THOP1         | 0 | chr19 | 2750000   |
| 14495   | THOP1        | 0 | 13599  | THOP1         | 0 | chr19 | 2751000   |
| -3921   | BMF          | 0 | 51001  | BUB1B         | 0 | chr15 | 38189500  |
| -4421   | BMF          | 0 | 50501  | BUB1B         | 0 | chr15 | 38190000  |
| -70290  | ZNF782       | 0 | 3912   | FAM22G        | 0 | chr9  | 98726500  |
| -70790  | ZNF782       | 0 | 3412   | FAM22G        | 0 | chr9  | 98727000  |
| -174365 | FOXD4L5      | 0 | 23442  | XD4L4,FOXD4L2 | 0 | chr9  | 69643000  |
| 65245   | ZNF710       | 0 | 14029  | ZNF710        | 0 | chr15 | 88411000  |
| 65745   | ZNF710       | 0 | 13529  | ZNF710        | 0 | chr15 | 88411500  |
| -138192 | FAM150B      | 0 | 241472 | TMEM18        | 0 | chr2  | 416500    |
| -138692 | FAM150B      | 0 | 240972 | TMEM18        | 0 | chr2  | 417000    |
| -116070 | RPS6KC1      | 0 | 598982 | PROX1         | 0 | chr1  | 211629500 |
| -19540  | LOC100129534 | 0 | 19573  | RER1          | 0 | chr1  | 2293500   |
| -20040  | LOC100129534 | 0 | 19073  | RER1          | 0 | chr1  | 2294000   |
| -20540  | LOC100129534 | 0 | 18573  | RER1          | 0 | chr1  | 2294500   |
| 78      | MMP23B       | 0 | 2393   | MMP23B        | 0 | chr1  | 1557500   |
| 578     | MMP23B       | 0 | 1893   | MMP23B        | 0 | chr1  | 1558000   |
| 479     | MMP23A       | 0 | 1390   | MMP23A        | 0 | chr1  | 1558500   |
| -1564   | CD79B        | 0 | 4645   | SCN4A         | 0 | chr17 | 59365000  |
| -4578   | C16orf90     | 0 | 963    | CLUAP1        | 0 | chr16 | 3490000   |
| 5919    | ABHD14A      | 0 | 255    | ABHD14A       | 0 | chr3  | 51990000  |
| -245    | ABHD14A      | 0 | 2102   | ACY1          | 0 | chr3  | 51990500  |
| 53885   | LOC400927    | 0 | 377    | LOC400927     | 0 | chr22 | 37124500  |
| -347916 | KGFLP2       | 0 | 798    | OA3,ANKRD20A2 | 0 | chr9  | 42357500  |
| -8837   | MDN1         | 0 | 1339   | CASP8AP2      | 0 | chr6  | 90595000  |
| -9337   | MDN1         | 0 | 839    | CASP8AP2      | 0 | chr6  | 90595500  |
| 1030    | PRR22        | 0 | 610    | PRR22         | 0 | chr19 | 5735000   |
| 1530    | PRR22        | 0 | 110    | PRR22         | 0 | chr19 | 5735500   |

|         |              |     |        |              |   |       |           |
|---------|--------------|-----|--------|--------------|---|-------|-----------|
| 10554   | SPERT        | 0   | 1694   | SPERT        | 0 | chr13 | 45185000  |
| -20645  | AGRN         | 0   | 5060   | C1orf159     | 0 | chr1  | 1002000   |
| -21145  | AGRN         | 0   | 4560   | C1orf159     | 0 | chr1  | 1002500   |
| -21645  | AGRN         | 0   | 4060   | C1orf159     | 0 | chr1  | 1003000   |
| -117886 | RBX1         | 0   | 2059   | EP300        | 0 | chr22 | 39816500  |
| -1069   | STAT3        | 0   | 12993  | PTRF         | 0 | chr17 | 37795000  |
| -1569   | STAT3        | 0   | 12493  | PTRF         | 0 | chr17 | 37795500  |
| 4427    | ADORA3       | 0   | 266    | ADORA3       | 0 | chr1  | 111848000 |
| -234    | ADORA3       | 0   | 115427 | RAP1A        | 0 | chr1  | 111848500 |
| -1927   | AMBP         | 0   | 11238  | KIF12        | 0 | chr9  | 115882500 |
| -3973   | HSPB2        | 0   | 810    | C11orf52     | 0 | chr11 | 111294000 |
| 6648    | TELO2        | 0   | 10460  | TELO2        | 0 | chr16 | 1490000   |
| 7148    | TELO2        | 0   | 9960   | TELO2        | 0 | chr16 | 1490500   |
| 2052    | TNRC18       | 0   | 114703 | TNRC18       | 0 | chr7  | 5315000   |
| 2552    | TNRC18       | 0   | 114203 | TNRC18       | 0 | chr7  | 5315500   |
| 851     | TBXAS1       | 0   | 241092 | TBXAS1       | 0 | chr7  | 139125500 |
| -807774 | CHSY3        | 0   | 164773 | HINT1        | 0 | chr5  | 130358000 |
| -808274 | CHSY3        | 0   | 164273 | HINT1        | 0 | chr5  | 130358500 |
| -808774 | CHSY3        | 0   | 163773 | HINT1        | 0 | chr5  | 130359000 |
| 93869   | DIP2C        | 0   | 321608 | DIP2C        | 0 | chr10 | 404000    |
| -1573   | RBM42        | 0   | 2486   | ETV2         | 0 | chr19 | 40822000  |
| 3116    | WNT4         | 0   | 22606  | WNT4         | 0 | chr1  | 22319500  |
| ---     | ---          | --- | 1490   | PLCXD1       | 0 | chrY  | 131500    |
| ---     | ---          | --- | 990    | PLCXD1       | 0 | chrY  | 132000    |
| ---     | ---          | --- | 490    | PLCXD1       | 0 | chrY  | 132500    |
| 104558  | BCOR         | 0   | 21526  | BCOR         | 0 | chrX  | 39900000  |
| 15592   | PQLC1        | 0   | 33641  | PQLC1        | 0 | chr18 | 75779000  |
| 16092   | PQLC1        | 0   | 33141  | PQLC1        | 0 | chr18 | 75779500  |
| -21720  | C10orf47     | 0   | 26026  | UPF2         | 0 | chr10 | 11976000  |
| -22220  | C10orf47     | 0   | 25526  | UPF2         | 0 | chr10 | 11976500  |
| 543     | OR1N1        | 0   | 393    | OR1N1        | 0 | chr9  | 124329000 |
| 6869    | RAB1B        | 0   | 2039   | RAB1B        | 0 | chr11 | 65799500  |
| 2797    | TYK2         | 0   | 27248  | TYK2         | 0 | chr19 | 10325000  |
| 3588    | PVRL1        | 0   | 64145  | PVRL1        | 0 | chr11 | 119040500 |
| 4088    | PVRL1        | 0   | 63645  | PVRL1        | 0 | chr11 | 119041000 |
| 143878  | LASS3        | 0   | 448    | LASS3        | 0 | chr15 | 98902000  |
| -312    | ABCC4        | 0   | 131858 | CLDN10       | 0 | chr13 | 94752000  |
| -812    | ABCC4        | 0   | 131358 | CLDN10       | 0 | chr13 | 94752500  |
| 99394   | ZNF516       | 0   | 4043   | ZNF516       | 0 | chr18 | 72300000  |
| 1435    | NFATC4       | 0   | 10150  | NFATC4       | 0 | chr14 | 23908500  |
| 13512   | SLC12A7      | 0   | 48172  | SLC12A7      | 0 | chr5  | 1117000   |
| 68366   | LMF1         | 0   | 48985  | LMF1         | 0 | chr16 | 912000    |
| 69366   | LMF1         | 0   | 47985  | LMF1         | 0 | chr16 | 913000    |
| -260276 | TMEM174      | 0   | 10840  | FOXD1        | 0 | chr5  | 72767000  |
| -260776 | TMEM174      | 0   | 10340  | FOXD1        | 0 | chr5  | 72767500  |
| -492982 | VAPA         | 0   | 1624   | APCDD1       | 0 | chr18 | 10443000  |
| -493482 | VAPA         | 0   | 1124   | APCDD1       | 0 | chr18 | 10443500  |
| 298     | PEPD         | 0   | 134641 | PEPD         | 0 | chr19 | 38570000  |
| 1298    | PEPD         | 0   | 133641 | PEPD         | 0 | chr19 | 38571000  |
| 419     | SLC16A3      | 0   | 10658  | SLC16A3      | 0 | chr17 | 77780000  |
| 388     | LOC145837    | 0   | 9333   | LOC145837    | 0 | chr15 | 67641500  |
| -1328   | SLC12A7      | 0   | 88209  | SLC6A19      | 0 | chr5  | 1166500   |
| ---     | ---          | --- | 379898 | LOC348021    | 0 | chr13 | 18100500  |
| ---     | ---          | --- | 379398 | LOC348021    | 0 | chr13 | 18101000  |
| 2156    | LONP1        | 0   | 26176  | LONP1        | 0 | chr19 | 5645000   |
| 2656    | LONP1        | 0   | 25676  | LONP1        | 0 | chr19 | 5645500   |
| 890     | LOC100132215 | 0   | 2850   | LOC100132215 | 0 | chr2  | 63125500  |
| 38965   | ANKRD11      | 0   | 183970 | ANKRD11      | 0 | chr16 | 87900500  |

|          |              |   |         |               |   |       |           |
|----------|--------------|---|---------|---------------|---|-------|-----------|
| 39465    | ANKRD11      | 0 | 183470  | ANKRD11       | 0 | chr16 | 87901000  |
| 40178    | C20orf203    | 0 | 904     | C20orf203     | 0 | chr20 | 30724500  |
| 94362    | ADRA1A       | 0 | 1339    | ADRA1A        | 0 | chr8  | 26777500  |
| 94862    | ADRA1A       | 0 | 839     | ADRA1A        | 0 | chr8  | 26778000  |
| -1238    | ICOSLG       | 0 | 4150    | DNMT3L        | 0 | chr21 | 44486500  |
| -1738    | ICOSLG       | 0 | 3650    | DNMT3L        | 0 | chr21 | 44487000  |
| 34040    | COL6A2       | 0 | 691     | COL6A2        | 0 | chr21 | 46376500  |
| 34540    | COL6A2       | 0 | 191     | COL6A2        | 0 | chr21 | 46377000  |
| 149377   | KDM4B        | 0 | 35108   | KDM4B         | 0 | chr19 | 5069500   |
| -15656   | FBRSL1       | 0 | 17975   | P2RX2         | 0 | chr12 | 131687500 |
| 649      | COL18A1      | 0 | 57562   | COL18A1       | 0 | chr21 | 45700500  |
| 15560    | MMEL1        | 0 | 26789   | MMEL1         | 0 | chr1  | 2527500   |
| 9325     | HIGD2B       | 0 | 1043    | HIGD2B        | 0 | chr15 | 70764500  |
| -25721   | CEBPD        | 0 | 9221    | PRKDC         | 0 | chr8  | 48839000  |
| -26221   | CEBPD        | 0 | 8721    | PRKDC         | 0 | chr8  | 48839500  |
| -61087   | NCRNA00169   | 0 | 313     | RUNDC2B       | 0 | chr16 | 21298500  |
| 187      | RUNDC2B      | 0 | 11915   | RUNDC2B       | 0 | chr16 | 21299000  |
| -88340   | BEGAIN       | 0 | 857     | C14orf70      | 0 | chr14 | 100192500 |
| -562     | RGS12        | 0 | 1523    | HGFAC         | 0 | chr4  | 3412000   |
| 4088     | PRKD2        | 0 | 38724   | PRKD2         | 0 | chr19 | 51873500  |
| -100     | BCL7C        | 0 | 2428    | CTF1          | 0 | chr16 | 30813000  |
| 5114     | XAGE1D       | 0 | 28      | XAGE1D        | 0 | chrX  | 52550000  |
| -472     | XAGE1D       | 0 | 7278    | XAGE1C,XAGE1A | 0 | chrX  | 52550500  |
| -814     | RLIM         | 0 | 117416  | KIAA2022      | 0 | chrX  | 73752000  |
| 18597    | DPYSL4       | 0 | 270     | DPYSL4        | 0 | chr10 | 133869000 |
| -230     | DPYSL4       | 0 | 1485    | STK32C        | 0 | chr10 | 133869500 |
| 11801    | PREX1        | 0 | 191827  | PREX1         | 0 | chr20 | 46686000  |
| 12301    | PREX1        | 0 | 191327  | PREX1         | 0 | chr20 | 46686500  |
| -3952    | SPATA13      | 0 | 1715    | C1QTNF9       | 0 | chr13 | 23780000  |
| -1198    | SULT1A2      | 0 | 7916    | SULT1A1       | 0 | chr16 | 28516500  |
| 2498     | C19orf22     | 0 | 14225   | C19orf22      | 0 | chr19 | 850000    |
| 2998     | C19orf22     | 0 | 13725   | C19orf22      | 0 | chr19 | 850500    |
| -57952   | AMTN         | 0 | 1589    | AMBN          | 0 | chr4  | 71491000  |
| -58452   | AMTN         | 0 | 1089    | AMBN          | 0 | chr4  | 71491500  |
| -69776   | BCR          | 0 | 2791    | ZDHHC8P1      | 0 | chr22 | 22060000  |
| -118464  | PLAC4        | 0 | 13030   | FAM3B         | 0 | chr21 | 41597500  |
| -118964  | PLAC4        | 0 | 12530   | FAM3B         | 0 | chr21 | 41598000  |
| 16322    | TTL8         | 0 | 23182   | TTL8          | 0 | chr22 | 48812000  |
| 1310     | SSTR3        | 0 | 4799    | SSTR3         | 0 | chr22 | 35933500  |
| -206276  | TMEM174      | 0 | 64840   | FOXDI         | 0 | chr5  | 72713000  |
| 16444    | SLC19A1      | 0 | 11279   | SLC19A1       | 0 | chr21 | 45775500  |
| 17444    | SLC19A1      | 0 | 10279   | SLC19A1       | 0 | chr21 | 45776500  |
| -255     | C1QTNF8      | 0 | 56741   | CACNA1H       | 0 | chr16 | 1086500   |
| -17801   | LCN1         | 0 | 1805    | OBP2A         | 0 | chr9  | 137576000 |
| 6773     | PTOV1        | 0 | 2811    | PTOV1         | 0 | chr19 | 55053000  |
| 132468   | WNK2         | 0 | 3175    | WNK2          | 0 | chr9  | 95119500  |
| -2102    | VGLL4        | 0 | 219418  | C3orf31       | 0 | chr3  | 11587500  |
| -115941  | LOC100130238 | 0 | 93729   | FBRSL1        | 0 | chr12 | 131483500 |
| -116941  | LOC100130238 | 0 | 92729   | FBRSL1        | 0 | chr12 | 131484500 |
| -232983  | HAND1        | 0 | 1654    | LARP1         | 0 | chr5  | 154071000 |
| 538      | ZNF414       | 0 | 3048    | ZNF414        | 0 | chr19 | 8482000   |
| 284      | ZNF414       | 0 | 2548    | ZNF414        | 0 | chr19 | 8482500   |
| -243695  | ARHGAP11B    | 0 | 21346   | FAN1          | 0 | chr15 | 28962000  |
| -244695  | ARHGAP11B    | 0 | 20346   | FAN1          | 0 | chr15 | 28963000  |
| 5450     | RERE         | 0 | 65834   | RERE          | 0 | chr1  | 8340500   |
| 23740    | ZNF362       | 0 | 20407   | ZNF362        | 0 | chr1  | 33518500  |
| 15418    | NLRP2        | 0 | 19317   | NLRP2         | 0 | chr19 | 60185000  |
| -2630207 | C4orf33      | 0 | 1406419 | PCDH10        | 0 | chr4  | 132883500 |

|          |                |   |         |             |   |       |           |
|----------|----------------|---|---------|-------------|---|-------|-----------|
| -2630707 | C4orf33        | 0 | 1405919 | PCDH10      | 0 | chr4  | 132884000 |
| -16469   | LOC644172      | 0 | 1494    | MGC57346    | 0 | chr17 | 41052000  |
| -16969   | LOC644172      | 0 | 994     | MGC57346    | 0 | chr17 | 41052500  |
| -5785    | DYSFIP1        | 0 | 2322    | P4HB        | 0 | chr17 | 77392000  |
| -6785    | DYSFIP1        | 0 | 1322    | P4HB        | 0 | chr17 | 77393000  |
| -77673   | C6orf57        | 0 | 1199    | SMAP1       | 0 | chr6  | 71433000  |
| -479584  | GGTLC1         | 0 | 834     | TMEM90B     | 0 | chr20 | 24397000  |
| -294     | MUC6           | 0 | 37874   | MUC2        | 0 | chr11 | 1027000   |
| -54345   | BUB1           | 0 | 120     | ACOXL       | 0 | chr2  | 111206500 |
| 5982     | PTPRS          | 0 | 129314  | PTPRS       | 0 | chr19 | 5162500   |
| 6982     | PTPRS          | 0 | 128314  | PTPRS       | 0 | chr19 | 5163500   |
| -301075  | BANP           | 0 | 51879   | ZNF469      | 0 | chr16 | 86969500  |
| -301575  | BANP           | 0 | 51379   | ZNF469      | 0 | chr16 | 86970000  |
| -305     | RD116-9,SNORD1 | 0 | 2276    | SNORD116-4  | 0 | chr15 | 22853500  |
| -100773  | PPP2R2C        | 0 | 1802    | MAN2B2      | 0 | chr4  | 6626000   |
| -101273  | PPP2R2C        | 0 | 1302    | MAN2B2      | 0 | chr4  | 6626500   |
| 66835    | UNC5A          | 0 | 3505    | UNC5A       | 0 | chr5  | 176237000 |
| 67835    | UNC5A          | 0 | 2505    | UNC5A       | 0 | chr5  | 176238000 |
| -12070   | GSTM2          | 0 | 440     | GSTM1       | 0 | chr1  | 110031500 |
| 60       | GSTM1          | 0 | 5889    | GSTM1       | 0 | chr1  | 110032000 |
| 94893    | GNG4           | 0 | 7416    | GNG4        | 0 | chr1  | 233872500 |
| 8783     | CSPG4          | 0 | 29744   | CSPG4       | 0 | chr15 | 73762500  |
| 28667    | FLJ42709       | 0 | 10759   | FLJ42709    | 0 | chr5  | 92932000  |
| 9016     | AEBP1          | 0 | 1184    | AEBP1       | 0 | chr7  | 44119500  |
| 9516     | AEBP1          | 0 | 684     | AEBP1       | 0 | chr7  | 44120000  |
| 1442     | TCIRG1         | 0 | 10442   | TCIRG1      | 0 | chr11 | 67564500  |
| 1548     | PALM           | 0 | 37830   | PALM        | 0 | chr19 | 661500    |
| 2048     | PALM           | 0 | 37330   | PALM        | 0 | chr19 | 662000    |
| 10685    | SF3A2          | 0 | 1178    | SF3A2       | 0 | chr19 | 2198500   |
| 10587    | TBC1D16        | 0 | 85242   | TBC1D16     | 0 | chr17 | 75539000  |
| 6300     | THEM5          | 0 | 297     | THEM5       | 0 | chr1  | 150092500 |
| -203     | THEM5          | 0 | 19683   | THEM4       | 0 | chr1  | 150093000 |
| 11900    | DENND4B        | 0 | 5278    | DENND4B     | 0 | chr1  | 152180500 |
| -511     | ACYP1          | 0 | 5051    | FAM164C     | 0 | chr14 | 74601000  |
| -1011    | ACYP1          | 0 | 4551    | FAM164C     | 0 | chr14 | 74601500  |
| -2675079 | NLGN4Y         | 0 | 56434   | NCRNA00230B | 0 | chrY  | 18140000  |
| 989      | PCDHGB1        | 0 | 161730  | PCDHGB1     | 0 | chr5  | 140711000 |
| 24977    | MOCS1          | 0 | 5232    | MOCS1       | 0 | chr6  | 40005000  |
| 74952    | TRRAP          | 0 | 59802   | TRRAP       | 0 | chr7  | 98389000  |
| 4370     | BCAT2          | 0 | 11613   | BCAT2       | 0 | chr19 | 53994500  |
| 4870     | BCAT2          | 0 | 11113   | BCAT2       | 0 | chr19 | 53995000  |
| 58866    | LMF1           | 0 | 58485   | LMF1        | 0 | chr16 | 902500    |
| 59366    | LMF1           | 0 | 57985   | LMF1        | 0 | chr16 | 903000    |
| 4653     | ASMT           | 0 | 42974   | ASMT        | 0 | chrY  | 1679000   |
| -1568    | RASD1          | 0 | 7601    | PEMT        | 0 | chr17 | 17342000  |
| 23427    | ARHGEF18       | 0 | 9370    | ARHGEF18    | 0 | chr19 | 7434000   |
| 23927    | ARHGEF18       | 0 | 8870    | ARHGEF18    | 0 | chr19 | 7434500   |
| 35449    | RELB           | 0 | 1292    | RELB        | 0 | chr19 | 50232000  |
| 12098    | TOP1MT         | 0 | 13425   | TOP1MT      | 0 | chr8  | 144475000 |
| -153067  | ZNF92          | 0 | 93711   | INTS4L2     | 0 | chr7  | 64656500  |
| -153567  | ZNF92          | 0 | 93211   | INTS4L2     | 0 | chr7  | 64657000  |
| -1157    | APRT           | 0 | 642     | GALNS       | 0 | chr16 | 87407000  |
| 13879    | INPP5K         | 0 | 8432    | INPP5K      | 0 | chr17 | 1358500   |
| 14379    | INPP5K         | 0 | 7932    | INPP5K      | 0 | chr17 | 1359000   |
| 15784    | NOTCH1         | 0 | 35559   | NOTCH1      | 0 | chr9  | 138524500 |
| -96048   | PRSS54         | 0 | 1298    | GINS3       | 0 | chr16 | 56982500  |
| -96548   | PRSS54         | 0 | 798     | GINS3       | 0 | chr16 | 56983000  |
| 39321    | FAM196A        | 0 | 21412   | FAM196A     | 0 | chr10 | 128863000 |

|         |              |   |        |              |   |       |           |
|---------|--------------|---|--------|--------------|---|-------|-----------|
| 39821   | FAM196A      | 0 | 20912  | FAM196A      | 0 | chr10 | 128863500 |
| 40321   | FAM196A      | 0 | 20412  | FAM196A      | 0 | chr10 | 128864000 |
| 8735    | REM1         | 0 | 869    | REM1         | 0 | chr20 | 29535500  |
| -126146 | TFAMP1       | 0 | 1632   | ELFN1        | 0 | chr7  | 1749000   |
| 868     | ELFN1        | 0 | 2616   | ELFN1        | 0 | chr7  | 1751500   |
| 907     | ADRA2C       | 0 | 1051   | ADRA2C       | 0 | chr4  | 3739000   |
| 7198    | MAP1S        | 0 | 7824   | MAP1S        | 0 | chr19 | 17698500  |
| 7698    | MAP1S        | 0 | 7324   | MAP1S        | 0 | chr19 | 17699000  |
| 8198    | MAP1S        | 0 | 6824   | MAP1S        | 0 | chr19 | 17699500  |
| -1019   | METRN        | 0 | 2658   | FAM173A      | 0 | chr16 | 708500    |
| -1519   | METRN        | 0 | 2158   | FAM173A      | 0 | chr16 | 709000    |
| 15631   | RBM38        | 0 | 2292   | RBM38        | 0 | chr20 | 55415500  |
| -11333  | POTEB        | 0 | 431395 | LOC727924    | 0 | chr15 | 19348000  |
| -11833  | POTEB        | 0 | 430895 | LOC727924    | 0 | chr15 | 19348500  |
| 15265   | SART1        | 0 | 3183   | SART1        | 0 | chr11 | 65501000  |
| -114941 | NOTCH1       | 0 | 2197   | EGFL7        | 0 | chr9  | 138675000 |
| -655    | CLIC3        | 0 | 10006  | ABCA2        | 0 | chr9  | 139011500 |
| 6273    | TBCB         | 0 | 4689   | TBCB         | 0 | chr19 | 41304000  |
| 6773    | TBCB         | 0 | 4189   | TBCB         | 0 | chr19 | 41304500  |
| 32688   | KIF26A       | 0 | 9488   | KIF26A       | 0 | chr14 | 103707500 |
| 33188   | KIF26A       | 0 | 8988   | KIF26A       | 0 | chr14 | 103708000 |
| -850    | ATP5SL       | 0 | 2402   | C19orf69     | 0 | chr19 | 46638500  |
| 234677  | ZNF704       | 0 | 1571   | ZNF704       | 0 | chr8  | 81948000  |
| 235177  | ZNF704       | 0 | 1071   | ZNF704       | 0 | chr8  | 81948500  |
| 7343    | LRRC23       | 0 | 2166   | LRRC23       | 0 | chr12 | 6891500   |
| -113386 | ZFATAS       | 0 | 520055 | LOC286094    | 0 | chr8  | 135795500 |
| -113886 | ZFATAS       | 0 | 519555 | LOC286094    | 0 | chr8  | 135796000 |
| -114386 | ZFATAS       | 0 | 519055 | LOC286094    | 0 | chr8  | 135796500 |
| -37875  | SNX8         | 0 | 2499   | EIF3B        | 0 | chr7  | 2358500   |
| -504    | C3orf70      | 0 | 37105  | EHHADH       | 0 | chr3  | 186354000 |
| -1004   | C3orf70      | 0 | 36605  | EHHADH       | 0 | chr3  | 186354500 |
| 250     | C4BPB        | 0 | 10460  | C4BPB        | 0 | chr1  | 205329500 |
| 1332    | ASPDH        | 0 | 1759   | ASPDH        | 0 | chr19 | 55708000  |
| -1602   | CNIH         | 0 | 31458  | GMFB         | 0 | chr14 | 53979500  |
| -2102   | CNIH         | 0 | 30958  | GMFB         | 0 | chr14 | 53980000  |
| 1590    | C4orf29      | 0 | 64405  | C4orf29      | 0 | chr4  | 129107500 |
| 2090    | C4orf29      | 0 | 63905  | C4orf29      | 0 | chr4  | 129108000 |
| 77246   | RFX8         | 0 | 97     | RFX8         | 0 | chr2  | 101457500 |
| -403    | RFX8         | 0 | 222919 | MAP4K4       | 0 | chr2  | 101458000 |
| 15932   | IL17REL      | 0 | 2182   | IL17REL      | 0 | chr22 | 48791000  |
| 82490   | PTPRN2       | 0 | 966243 | PTPRN2       | 0 | chr7  | 157107000 |
| -7159   | CCDC137      | 0 | 128    | ARL16        | 0 | chr17 | 77258500  |
| 372     | ARL16        | 0 | 2359   | ARL16        | 0 | chr17 | 77259000  |
| 82160   | AP2A2        | 0 | 4240   | AP2A2        | 0 | chr11 | 998000    |
| 13129   | MUC5B        | 0 | 25982  | MUC5B        | 0 | chr11 | 1214000   |
| 35056   | ZMAT5        | 0 | 969    | ZMAT5        | 0 | chr22 | 28492000  |
| -835    | SHF          | 0 | 50219  | SLC28A2      | 0 | chr15 | 43281500  |
| -51613  | KRTAP10-12   | 0 | 19382  | UBE2G2       | 0 | chr21 | 44994000  |
| 69797   | GPR116       | 0 | 32634  | GPR116       | 0 | chr6  | 46998000  |
| 6492    | PGAM5        | 0 | 1825   | PGAM5        | 0 | chr12 | 131804000 |
| 249525  | ODZ4         | 0 | 537843 | ODZ4         | 0 | chr11 | 78291500  |
| 250025  | ODZ4         | 0 | 537343 | ODZ4         | 0 | chr11 | 78292000  |
| -13578  | ACTG1        | 0 | 2011   | FSCN2        | 0 | chr17 | 77108000  |
| -73     | MSLNL        | 0 | 1974   | RPUSD1       | 0 | chr16 | 773000    |
| 450     | NOD2         | 0 | 35488  | NOD2         | 0 | chr16 | 49289000  |
| -11865  | ANKRD34C     | 0 | 1045   | TMED3        | 0 | chr15 | 77389500  |
| 423     | DKFZP434K028 | 0 | 3212   | DKFZP434K028 | 0 | chr11 | 61278500  |
| 233547  | MAD1L1       | 0 | 183609 | MAD1L1       | 0 | chr7  | 2055500   |

|          |              |   |         |           |   |       |           |
|----------|--------------|---|---------|-----------|---|-------|-----------|
| 234047   | MAD1L1       | 0 | 183109  | MAD1L1    | 0 | chr7  | 2056000   |
| -2523    | GPER         | 0 | 56569   | ZFAND2A   | 0 | chr7  | 1102500   |
| -305274  | ERICH1       | 0 | 460475  | DLGAP2    | 0 | chr8  | 976500    |
| -305774  | ERICH1       | 0 | 459975  | DLGAP2    | 0 | chr8  | 977000    |
| -306274  | ERICH1       | 0 | 459475  | DLGAP2    | 0 | chr8  | 977500    |
| -306774  | ERICH1       | 0 | 458975  | DLGAP2    | 0 | chr8  | 978000    |
| -4412    | CHRM1        | 0 | 50644   | SLC22A6   | 0 | chr11 | 62450000  |
| 226      | KALRN        | 0 | 626226  | KALRN     | 0 | chr3  | 125296500 |
| -7758    | PTPN7        | 0 | 301     | PTPRVP    | 0 | chr1  | 200403500 |
| 199      | PTPRVP       | 0 | 21200   | PTPRVP    | 0 | chr1  | 200404000 |
| -473     | DNMT3L       | 0 | 23190   | AIRE      | 0 | chr21 | 44507000  |
| 138814   | RREB1        | 0 | 4691    | RREB1     | 0 | chr6  | 7192000   |
| 49375    | GPATCH1      | 0 | 158     | GPATCH1   | 0 | chr19 | 38313000  |
| 4106     | PAPOLB       | 0 | 151     | PAPOLB    | 0 | chr7  | 4868000   |
| 9670     | DOK7         | 0 | 21507   | DOK7      | 0 | chr4  | 3444500   |
| 10170    | DOK7         | 0 | 21007   | DOK7      | 0 | chr4  | 3445000   |
| 125256   | JAK2         | 0 | 17682   | JAK2      | 0 | chr9  | 5100500   |
| 96300    | NIN          | 0 | 7589    | NIN       | 0 | chr14 | 50360000  |
| 96800    | NIN          | 0 | 7089    | NIN       | 0 | chr14 | 50360500  |
| -71025   | SLC25A36     | 0 | 932     | SPSB4     | 0 | chr3  | 142252500 |
| -1571429 | TTY23B,TTY23 | 0 | 1352691 | TTY15     | 0 | chrY  | 11931000  |
| -133312  | FRMD1        | 0 | 94432   | DACT2     | 0 | chr6  | 168356000 |
| -73903   | VWF          | 0 | 1815    | CD9       | 0 | chr12 | 6178000   |
| 4364     | ENTPD8       | 0 | 2722    | ENTPD8    | 0 | chr9  | 139453000 |
| -63404   | SPTY2D1      | 0 | 926     | TMEM86A   | 0 | chr11 | 18676000  |
| -40859   | H19          | 0 | 90422   | IGF2      | 0 | chr11 | 2016500   |
| -41359   | H19          | 0 | 89922   | IGF2      | 0 | chr11 | 2017000   |
| 38070    | OTOP1        | 0 | 22      | OTOP1     | 0 | chr4  | 4279500   |
| -2779    | PITX3        | 0 | 1298    | GBF1      | 0 | chr10 | 103994000 |
| 30910    | RTEL1        | 0 | 7045    | RTEL1     | 0 | chr20 | 61791000  |
| 31410    | RTEL1        | 0 | 6545    | RTEL1     | 0 | chr20 | 61791500  |
| 6047     | ATP6VOC      | 0 | 220     | ATP6VOC   | 0 | chr16 | 2510000   |
| 3137     | BOP1         | 0 | 25928   | BOP1      | 0 | chr8  | 145460000 |
| 2216     | C10orf125    | 0 | 519     | C10orf125 | 0 | chr10 | 135021000 |
| 2716     | C10orf125    | 0 | 19      | C10orf125 | 0 | chr10 | 135021500 |
| 483      | KLF14        | 0 | 900     | KLF14     | 0 | chr7  | 130068500 |
| 983      | KLF14        | 0 | 400     | KLF14     | 0 | chr7  | 130069000 |
| 21634    | MYH7B        | 0 | 5397    | MYH7B     | 0 | chr20 | 33048500  |
| 22134    | MYH7B        | 0 | 4897    | MYH7B     | 0 | chr20 | 33049000  |
| -32040   | LOC100129534 | 0 | 7073    | RER1      | 0 | chr1  | 2306000   |
| -32540   | LOC100129534 | 0 | 6573    | RER1      | 0 | chr1  | 2306500   |
| -14857   | SERPINA3     | 0 | 1814    | SERPINA13 | 0 | chr14 | 94175000  |
| 5653     | ASMT         | 0 | 41974   | ASMT      | 0 | chrY  | 1680000   |
| 6153     | ASMT         | 0 | 41474   | ASMT      | 0 | chrY  | 1680500   |
| -26      | KNCN         | 0 | 6177    | MKNK1     | 0 | chr1  | 46789500  |
| 27760    | C2orf55      | 0 | 114616  | C2orf55   | 0 | chr2  | 98804500  |
| 28260    | C2orf55      | 0 | 114116  | C2orf55   | 0 | chr2  | 98805000  |
| 181      | DOHH         | 0 | 9621    | DOHH      | 0 | chr19 | 3442000   |
| 7        | APOB48R      | 0 | 4283    | APOB48R   | 0 | chr16 | 28413500  |
| -7702    | CCDC81       | 0 | 10297   | ME3       | 0 | chr11 | 85819500  |
| -8702    | CCDC81       | 0 | 9297    | ME3       | 0 | chr11 | 85820500  |
| -2912    | NDUFV1       | 0 | 12484   | NUDT8     | 0 | chr11 | 67139500  |
| -3412    | NDUFV1       | 0 | 11984   | NUDT8     | 0 | chr11 | 67140000  |
| -3912    | NDUFV1       | 0 | 11484   | NUDT8     | 0 | chr11 | 67140500  |
| -857352  | FAM84B       | 0 | 38      | POU5F1B   | 0 | chr8  | 128497000 |
| 462      | POU5F1B      | 0 | 1121    | POU5F1B   | 0 | chr8  | 128497500 |
| 176794   | SLC22A23     | 0 | 10792   | SLC22A23  | 0 | chr6  | 3391000   |
| -24231   | ACOXL        | 0 | 2461    | BCL2L11   | 0 | chr2  | 111592500 |



|         |           |   |        |           |   |       |           |
|---------|-----------|---|--------|-----------|---|-------|-----------|
| 35192   | PLEC      | 0 | 25031  | PLEC      | 0 | chr8  | 145096500 |
| 32558   | BCOR      | 0 | 93526  | BCOR      | 0 | chrX  | 39828000  |
| 877     | GAL3ST1   | 0 | 9376   | GAL3ST1   | 0 | chr22 | 29281500  |
| 68079   | RSF1      | 0 | 86528  | RSF1      | 0 | chr11 | 77123000  |
| 68579   | RSF1      | 0 | 86028  | RSF1      | 0 | chr11 | 77123500  |
| -988416 | GALR1     | 0 | 741762 | SALL3     | 0 | chr18 | 74099500  |
| -988916 | GALR1     | 0 | 741262 | SALL3     | 0 | chr18 | 74100000  |
| -703    | HERPUD2   | 0 | 105151 | SEPT7     | 0 | chr7  | 35702000  |
| -892    | FSTL1     | 0 | 144317 | NDUFB4    | 0 | chr3  | 121653500 |
| -31669  | TRIM38    | 0 | 238    | HIST1H1A  | 0 | chr6  | 26125000  |
| -30173  | UBE3C     | 0 | 37470  | DNAJB6    | 0 | chr7  | 156785000 |
| 25165   | NR5A1     | 0 | 1020   | NR5A1     | 0 | chr9  | 126308500 |
| 25665   | NR5A1     | 0 | 520    | NR5A1     | 0 | chr9  | 126309000 |
| 74369   | DIP2C     | 0 | 341108 | DIP2C     | 0 | chr10 | 384500    |
| 17368   | PDGFB     | 0 | 3903   | PDGFB     | 0 | chr22 | 37967000  |
| 17868   | PDGFB     | 0 | 3403   | PDGFB     | 0 | chr22 | 37967500  |
| -36641  | TNIP2     | 0 | 47     | SH3BP2    | 0 | chr4  | 2764500   |
| -1913   | EPS8L3    | 0 | 144755 | CSF1      | 0 | chr1  | 110110000 |
| -2413   | EPS8L3    | 0 | 144255 | CSF1      | 0 | chr1  | 110110500 |
| -49457  | FLJ40292  | 0 | 63561  | CACNA1B   | 0 | chr9  | 139828500 |
| -49957  | FLJ40292  | 0 | 63061  | CACNA1B   | 0 | chr9  | 139829000 |
| 2840    | LCN8      | 0 | 1052   | LCN8      | 0 | chr9  | 138771500 |
| 3340    | LCN8      | 0 | 552    | LCN8      | 0 | chr9  | 138772000 |
| 3840    | LCN8      | 0 | 52     | LCN8      | 0 | chr9  | 138772500 |
| -39315  | PARD6B    | 0 | 1873   | BCAS4     | 0 | chr20 | 48843000  |
| 1748    | GPSM1     | 0 | 30378  | GPSM1     | 0 | chr9  | 138343500 |
| 2248    | GPSM1     | 0 | 29878  | GPSM1     | 0 | chr9  | 138344000 |
| -84275  | PNLDC1    | 0 | 1963   | MAS1      | 0 | chr6  | 160246000 |
| -84775  | PNLDC1    | 0 | 1463   | MAS1      | 0 | chr6  | 160246500 |
| -10451  | SLC9A3    | 0 | 77404  | CEP72     | 0 | chr5  | 588000    |
| -10951  | SLC9A3    | 0 | 76904  | CEP72     | 0 | chr5  | 588500    |
| -18776  | SERPINB12 | 0 | 1513   | SERPINB13 | 0 | chr18 | 59404000  |
| -49     | ELFN2     | 0 | 41548  | MFNG      | 0 | chr22 | 36153500  |
| -549    | ELFN2     | 0 | 41048  | MFNG      | 0 | chr22 | 36154000  |
| -556846 | SV2B      | 0 | 1441   | SLCO3A1   | 0 | chr15 | 90196500  |
| 88153   | MYO7B     | 0 | 13773  | MYO7B     | 0 | chr2  | 128098000 |
| 88653   | MYO7B     | 0 | 13273  | MYO7B     | 0 | chr2  | 128098500 |
| 622     | YDJC      | 0 | 1340   | YDJC      | 0 | chr22 | 20313000  |
| 272442  | SRPK2     | 0 | 77     | SRPK2     | 0 | chr7  | 104816500 |
| -1065   | ADAMTS2   | 0 | 204176 | RUFY1     | 0 | chr5  | 178706000 |
| -1565   | ADAMTS2   | 0 | 203676 | RUFY1     | 0 | chr5  | 178706500 |
| 1643    | CHST2     | 0 | 1502   | CHST2     | 0 | chr3  | 144323000 |
| 31469   | ASMTL     | 0 | 18344  | ASMTL     | 0 | chrX  | 1513500   |
| 4287    | KIF13B    | 0 | 191529 | KIF13B    | 0 | chr8  | 28985000  |
| -53970  | CRLF2     | 0 | 2200   | CSF2RA    | 0 | chrX  | 1345500   |
| -35445  | TLR6      | 0 | 2831   | FAM114A1  | 0 | chr4  | 38543000  |
| -35945  | TLR6      | 0 | 2331   | FAM114A1  | 0 | chr4  | 38543500  |
| 1874    | CCDC157   | 0 | 18318  | CCDC157   | 0 | chr22 | 29084500  |
| 139     | UGT1A10   | 0 | 136690 | UGT1A10   | 0 | chr2  | 234210000 |
| 5084    | PPP1R16A  | 0 | 312    | PPP1R16A  | 0 | chr8  | 145698000 |
| -188    | PPP1R16A  | 0 | 1772   | GPT       | 0 | chr8  | 145698500 |
| -270228 | BOD1      | 0 | 1436   | CPEB4     | 0 | chr5  | 173246500 |
| -270728 | BOD1      | 0 | 936    | CPEB4     | 0 | chr5  | 173247000 |
| -3949   | ARAP1     | 0 | 28421  | STARD10   | 0 | chr11 | 72115000  |
| -4449   | ARAP1     | 0 | 27921  | STARD10   | 0 | chr11 | 72115500  |
| 172     | C17orf105 | 0 | 4080   | C17orf105 | 0 | chr17 | 39213500  |
| 672     | C17orf105 | 0 | 3580   | C17orf105 | 0 | chr17 | 39214000  |
| -928    | ATF7      | 0 | 63210  | ATP5G2    | 0 | chr12 | 52282000  |

|         |              |   |         |          |   |       |           |
|---------|--------------|---|---------|----------|---|-------|-----------|
| 375     | LRRRC14B     | 0 | 3468    | LRRRC14B | 0 | chr5  | 245000    |
| -56616  | QKI          | 0 | 1641642 | C6orf118 | 0 | chr6  | 163971500 |
| -57116  | QKI          | 0 | 1641142 | C6orf118 | 0 | chr6  | 163972000 |
| -467751 | OR4N3P       | 0 | 1335    | TUBGCP5  | 0 | chr15 | 20383500  |
| 1627    | SCN1B        | 0 | 8193    | SCN1B    | 0 | chr19 | 40215000  |
| 4653    | ASMT         | 0 | 42974   | ASMT     | 0 | chrX  | 1679000   |
| 322     | TPSAB1       | 0 | 1556    | TPSAB1   | 0 | chr16 | 1231000   |
| -20672  | ADAMTS7      | 0 | 40726   | MORF4L1  | 0 | chr15 | 76911500  |
| -248385 | FAM92B       | 0 | 250529  | KIAA0182 | 0 | chr16 | 83952000  |
| -566    | TRIM45       | 0 | 21231   | VTCN1    | 0 | chr1  | 117466500 |
| -1066   | TRIM45       | 0 | 20731   | VTCN1    | 0 | chr1  | 117467000 |
| 688     | NANOS2       | 0 | 876     | NANOS2   | 0 | chr19 | 51109000  |
| 331     | ARHGAP23     | 0 | 54653   | ARHGAP23 | 0 | chr17 | 33867500  |
| 43      | MAPK12       | 0 | 8716    | MAPK12   | 0 | chr22 | 49033500  |
| 197658  | INPP5A       | 0 | 47974   | INPP5A   | 0 | chr10 | 134399000 |
| 297     | SRPK3        | 0 | 4381    | SRPK3    | 0 | chrX  | 152700000 |
| -1561   | HK3          | 0 | 4111    | UIMC1    | 0 | chr5  | 176260500 |
| 1174    | PQLC2        | 0 | 15881   | PQLC2    | 0 | chr1  | 19512500  |
| 11685   | SF3A2        | 0 | 178     | SF3A2    | 0 | chr19 | 2199500   |
| -2221   | SLC19A1      | 0 | 305302  | PCBP3    | 0 | chr21 | 45789000  |
| 9315    | ARHGEF19     | 0 | 5191    | ARHGEF19 | 0 | chr1  | 16406500  |
| 13251   | PDLIM4       | 0 | 2544    | PDLIM4   | 0 | chr5  | 131634500 |
| 13751   | PDLIM4       | 0 | 2044    | PDLIM4   | 0 | chr5  | 131635000 |
| -125941 | LOC100130238 | 0 | 83729   | FBRSL1   | 0 | chr12 | 131493500 |
| -126441 | LOC100130238 | 0 | 83229   | FBRSL1   | 0 | chr12 | 131494000 |
| -802    | ZNF83        | 0 | 12783   | ZNF611   | 0 | chr19 | 57886500  |
| 19192   | PLEC         | 0 | 41031   | PLEC     | 0 | chr8  | 145080500 |
| 19692   | PLEC         | 0 | 40531   | PLEC     | 0 | chr8  | 145081000 |
| 20192   | PLEC         | 0 | 40031   | PLEC     | 0 | chr8  | 145081500 |
| -103425 | CRTAC1       | 0 | 370     | C10orf28 | 0 | chr10 | 99884000  |
| -515    | SOX10        | 0 | 72207   | PICK1    | 0 | chr22 | 36711000  |
| -1015   | SOX10        | 0 | 71707   | PICK1    | 0 | chr22 | 36711500  |
| 160023  | RAPGEF1      | 0 | 746     | RAPGEF1  | 0 | chr9  | 133602000 |
| 160523  | RAPGEF1      | 0 | 246     | RAPGEF1  | 0 | chr9  | 133602500 |
| 2073    | MAPK8IP2     | 0 | 6345    | MAPK8IP2 | 0 | chr22 | 49390500  |
| 2573    | MAPK8IP2     | 0 | 5845    | MAPK8IP2 | 0 | chr22 | 49391000  |
| -63783  | RGAG1        | 0 | 195     | TDGF3    | 0 | chrX  | 109650000 |
| 305     | TDGF3        | 0 | 2405    | TDGF3    | 0 | chrX  | 109650500 |
| 10654   | ODF3L2       | 0 | 983     | ODF3L2   | 0 | chr19 | 425000    |
| -121828 | TAGAP        | 0 | 2416    | FNDC1    | 0 | chr6  | 159508000 |
| 20964   | ARID3A       | 0 | 25803   | ARID3A   | 0 | chr19 | 898000    |
| 21464   | ARID3A       | 0 | 25303   | ARID3A   | 0 | chr19 | 898500    |
| 21964   | ARID3A       | 0 | 24803   | ARID3A   | 0 | chr19 | 899000    |
| -99480  | GOT1         | 0 | 2679    | NKX2-3   | 0 | chr10 | 101280000 |
| -99980  | GOT1         | 0 | 2179    | NKX2-3   | 0 | chr10 | 101280500 |
| -1413   | CDC34        | 0 | 526     | GZMM     | 0 | chr19 | 494500    |
| 2610    | CCDC154      | 0 | 7491    | CCDC154  | 0 | chr16 | 1427000   |
| 25281   | XIST         | 0 | 6813    | XIST     | 0 | chrX  | 72982500  |
| 14719   | KDM2B        | 0 | 136747  | KDM2B    | 0 | chr12 | 120366000 |
| -91     | C11orf94     | 0 | 2296    | PEX16    | 0 | chr11 | 45885500  |
| 68797   | GPR116       | 0 | 33634   | GPR116   | 0 | chr6  | 46997000  |
| 69297   | GPR116       | 0 | 33134   | GPR116   | 0 | chr6  | 46997500  |
| 5944    | ANAPC2       | 0 | 7878    | ANAPC2   | 0 | chr9  | 139195000 |
| -83073  | TOPBP1       | 0 | 1424    | TF       | 0 | chr3  | 134946500 |
| -83573  | TOPBP1       | 0 | 924     | TF       | 0 | chr3  | 134947000 |
| 714     | TERT         | 0 | 41162   | TERT     | 0 | chr5  | 1307000   |
| -131130 | SLC35F5      | 0 | 2006    | ACTR3    | 0 | chr2  | 114362000 |
| -94505  | ANKRD30BL    | 0 | 160116  | GPR39    | 0 | chr2  | 132730500 |

|         |           |   |        |               |   |       |           |
|---------|-----------|---|--------|---------------|---|-------|-----------|
| -95005  | ANKRD30BL | 0 | 159616 | GPR39         | 0 | chr2  | 132731000 |
| -5713   | TMEM8C    | 0 | 1606   | ADAMTSL2      | 0 | chr9  | 135385500 |
| -1507   | BSG       | 0 | 4892   | HCN2          | 0 | chr19 | 536000    |
| 8339    | ADAMTS4   | 0 | 969    | ADAMTS4       | 0 | chr1  | 159434500 |
| -26290  | INPP5F    | 0 | 775    | INPP5F        | 0 | chr10 | 121568000 |
| 7668    | ZP4       | 0 | 558    | ZP4           | 0 | chr1  | 236120000 |
| 8168    | ZP4       | 0 | 58     | ZP4           | 0 | chr1  | 236120500 |
| -83589  | NKX6-1    | 0 | 1080   | CDS1          | 0 | chr4  | 85722000  |
| -9297   | TRIB3     | 0 | 1208   | RBCK1         | 0 | chr20 | 335500    |
| 354     | PIM3      | 0 | 3223   | PIM3          | 0 | chr22 | 48740500  |
| 1509    | LOC441956 | 0 | 330    | LOC441956     | 0 | chr21 | 13975000  |
| -170    | LOC441956 | 0 | 161825 | C21orf15      | 0 | chr21 | 13975500  |
| -670    | LOC441956 | 0 | 161325 | C21orf15      | 0 | chr21 | 13976000  |
| 3009    | PCDHGC5   | 0 | 20730  | PCDHGC5       | 0 | chr5  | 140852000 |
| 69609   | CDYL      | 0 | 179776 | CDYL          | 0 | chr6  | 4721000   |
| 70109   | CDYL      | 0 | 179276 | CDYL          | 0 | chr6  | 4721500   |
| 801     | OR2A20P   | 0 | 129    | OR2A20P       | 0 | chr7  | 143579500 |
| -5388   | GPR77     | 0 | 1885   | DHX34         | 0 | chr19 | 52542500  |
| -205774 | NBPF4     | 0 | 426    | NBPF6         | 0 | chr1  | 108794000 |
| -160954 | SIX2      | 0 | 218323 | SRBD1         | 0 | chr2  | 45251000  |
| -161454 | SIX2      | 0 | 217823 | SRBD1         | 0 | chr2  | 45251500  |
| -34530  | LOC400931 | 0 | 2162   | PPARA         | 0 | chr22 | 44923000  |
| -45     | F8A3,F8A2 | 0 | 773    | H2AFB3,H2AFB1 | 0 | chrX  | 154341500 |
| 119187  | NFATC1    | 0 | 9811   | NFATC1        | 0 | chr18 | 75380500  |
| -47681  | BAG3      | 0 | 598    | INPP5F        | 0 | chr10 | 121475000 |
| -48181  | BAG3      | 0 | 98     | INPP5F        | 0 | chr10 | 121475500 |
| 95827   | ARHGEF7   | 0 | 23082  | ARHGEF7       | 0 | chr13 | 110733000 |
| 96327   | ARHGEF7   | 0 | 22582  | ARHGEF7       | 0 | chr13 | 110733500 |
| 37909   | SLC8A2    | 0 | 6119   | SLC8A2        | 0 | chr19 | 52661000  |
| -1075   | MTHFS     | 0 | 736    | ST20          | 0 | chr15 | 77977500  |
| -18497  | MOBKL1B   | 0 | 1197   | MTHFD2        | 0 | chr2  | 74278000  |
| 3968    | EPS8L1    | 0 | 8103   | EPS8L1        | 0 | chr19 | 60283000  |
| -832    | C6orf186  | 0 | 33075  | DDO           | 0 | chr6  | 110787000 |
| 40515   | DAGLA     | 0 | 26049  | DAGLA         | 0 | chr11 | 61245000  |
| -20458  | DIO3      | 0 | 146526 | NCRNA00239    | 0 | chr14 | 101120000 |
| -8057   | ZNF578    | 0 | 2720   | ZNF808        | 0 | chr19 | 57720000  |
| -8557   | ZNF578    | 0 | 2220   | ZNF808        | 0 | chr19 | 57720500  |
| -5255   | KRTAP6-3  | 0 | 375    | KRTAP6-2      | 0 | chr21 | 30892500  |
| 125     | KRTAP6-2  | 0 | 64     | KRTAP6-2      | 0 | chr21 | 30893000  |
| -16311  | RBM44     | 0 | 425    | RAMP1         | 0 | chr2  | 238432500 |
| -1544   | SNTB2     | 0 | 787    | VPS4A         | 0 | chr16 | 67902000  |
| 132087  | NCOR2     | 0 | 79102  | NCOR2         | 0 | chr12 | 123507000 |
| 132587  | NCOR2     | 0 | 78602  | NCOR2         | 0 | chr12 | 123507500 |
| 12616   | WNT4      | 0 | 13106  | WNT4          | 0 | chr1  | 22329000  |
| 5148    | ZCCHC14   | 0 | 80461  | ZCCHC14       | 0 | chr16 | 86002500  |
| 5648    | ZCCHC14   | 0 | 79961  | ZCCHC14       | 0 | chr16 | 86003000  |
| -31949  | ARAP1     | 0 | 421    | STARD10       | 0 | chr11 | 72143000  |
| 79      | STARD10   | 0 | 38898  | STARD10       | 0 | chr11 | 72143500  |
| 286461  | SYN3      | 0 | 259377 | SYN3          | 0 | chr22 | 31525000  |
| 4422    | ADSSL1    | 0 | 18692  | ADSSL1        | 0 | chr14 | 104266000 |
| -1921   | ZNF461    | 0 | 20641  | ZNF567        | 0 | chr19 | 41851500  |
| 23531   | PPP2R3B   | 0 | 29127  | PPP2R3B       | 0 | chrX  | 238500    |
| 24031   | PPP2R3B   | 0 | 28627  | PPP2R3B       | 0 | chrX  | 239000    |
| 24531   | PPP2R3B   | 0 | 28127  | PPP2R3B       | 0 | chrX  | 239500    |
| -214373 | ELAVL4    | 0 | 1313   | DMRTA2        | 0 | chr1  | 50654500  |
| -214873 | ELAVL4    | 0 | 813    | DMRTA2        | 0 | chr1  | 50655000  |
| -2202   | RNPS1     | 0 | 5879   | ABCA3         | 0 | chr16 | 2260000   |
| -2702   | RNPS1     | 0 | 5379   | ABCA3         | 0 | chr16 | 2260500   |

|         |           |   |        |           |   |       |           |
|---------|-----------|---|--------|-----------|---|-------|-----------|
| -17310  | INF2      | 0 | 2078   | ADSSL1    | 0 | chr14 | 104259500 |
| -145049 | PTPN18    | 0 | 636    | CFC1B     | 0 | chr2  | 130994500 |
| -1080   | P2RY14    | 0 | 14565  | GPR87     | 0 | chr3  | 152480000 |
| -23359  | H19       | 0 | 107922 | IGF2      | 0 | chr11 | 1999000   |
| -266932 | PTCH1     | 0 | 22190  | C9orf130  | 0 | chr9  | 97586000  |
| -267432 | PTCH1     | 0 | 21690  | C9orf130  | 0 | chr9  | 97586500  |
| 19677   | MUC6      | 0 | 4206   | MUC6      | 0 | chr11 | 1022500   |
| -20730  | LCN12     | 0 | 1276   | PTGDS     | 0 | chr9  | 138990500 |
| -21230  | LCN12     | 0 | 776    | PTGDS     | 0 | chr9  | 138991000 |
| 30979   | ZFR2      | 0 | 34027  | ZFR2      | 0 | chr19 | 3786000   |
| 429     | MEN1      | 0 | 6611   | MEN1      | 0 | chr11 | 64328000  |
| 929     | MEN1      | 0 | 6111   | MEN1      | 0 | chr11 | 64328500  |
| 1429    | MEN1      | 0 | 5611   | MEN1      | 0 | chr11 | 64329000  |
| -26364  | CRYBA4    | 0 | 483    | MIAT      | 0 | chr22 | 25383000  |
| -14734  | GNA15     | 0 | 265    | S1PR4     | 0 | chr19 | 3129500   |
| 235     | S1PR4     | 0 | 1330   | S1PR4     | 0 | chr19 | 3130000   |
| -16336  | RBP7      | 0 | 602    | UBE4B     | 0 | chr1  | 10015000  |
| -51623  | LOC285370 | 0 | 416    | SLC6A11   | 0 | chr3  | 10832500  |
| 9168    | LEPREL2   | 0 | 2279   | LEPREL2   | 0 | chr12 | 6817000   |
| 13416   | LOC146336 | 0 | 1232   | LOC146336 | 0 | chr16 | 1067500   |
| 2496    | PCNXL2    | 0 | 309082 | PCNXL2    | 0 | chr1  | 231189000 |
| 49885   | OCA2      | 0 | 294553 | OCA2      | 0 | chr15 | 25723500  |
| 57587   | LPCAT2    | 0 | 20082  | LPCAT2    | 0 | chr16 | 54158000  |
| 416     | CAPNS2    | 0 | 593    | CAPNS2    | 0 | chr16 | 54158500  |
| -13056  | EFNA2     | 0 | 41975  | MUM1      | 0 | chr19 | 1264000   |
| -13556  | EFNA2     | 0 | 41475  | MUM1      | 0 | chr19 | 1264500   |
| -15916  | TMEM121   | 0 | 371382 | KIAA0125  | 0 | chr14 | 105083500 |
| -16916  | TMEM121   | 0 | 370382 | KIAA0125  | 0 | chr14 | 105084500 |
| 2057    | C2CD4C    | 0 | 1670   | C2CD4C    | 0 | chr19 | 358500    |
| 2557    | C2CD4C    | 0 | 1170   | C2CD4C    | 0 | chr19 | 359000    |
| 109     | LOC150527 | 0 | 13204  | LOC150527 | 0 | chr2  | 131045000 |
| 10401   | C6orf146  | 0 | 390    | C6orf146  | 0 | chr6  | 4024000   |
| -37145  | SEC62     | 0 | 2428   | GPR160    | 0 | chr3  | 171236000 |
| 5166    | NXN       | 0 | 175260 | NXN       | 0 | chr17 | 654500    |
| 5666    | NXN       | 0 | 174760 | NXN       | 0 | chr17 | 655000    |
| -166308 | CNGA2     | 0 | 1016   | MAGEA4    | 0 | chrX  | 150831000 |
| -166808 | CNGA2     | 0 | 516    | MAGEA4    | 0 | chrX  | 150831500 |
| -167308 | CNGA2     | 0 | 16     | MAGEA4    | 0 | chrX  | 150832000 |
| 484     | MAGEA4    | 0 | 11798  | MAGEA4    | 0 | chrX  | 150832500 |
| 984     | MAGEA4    | 0 | 11298  | MAGEA4    | 0 | chrX  | 150833000 |
| 1484    | MAGEA4    | 0 | 10798  | MAGEA4    | 0 | chrX  | 150833500 |
| 1984    | MAGEA4    | 0 | 10298  | MAGEA4    | 0 | chrX  | 150834000 |
| 2484    | MAGEA4    | 0 | 9798   | MAGEA4    | 0 | chrX  | 150834500 |
| 2984    | MAGEA4    | 0 | 9298   | MAGEA4    | 0 | chrX  | 150835000 |
| 136     | MAGEA4    | 0 | 8798   | MAGEA4    | 0 | chrX  | 150835500 |
| 85      | MAGEA4    | 0 | 6798   | MAGEA4    | 0 | chrX  | 150837500 |
| -36808  | PTGDR     | 0 | 765    | PTGER2    | 0 | chr14 | 51850000  |
| -70575  | GRIN2A    | 0 | 176225 | ATF7IP2   | 0 | chr16 | 10254000  |
| 15759   | SLCO4A1   | 0 | 14092  | SLCO4A1   | 0 | chr20 | 60760000  |
| 16259   | SLCO4A1   | 0 | 13592  | SLCO4A1   | 0 | chr20 | 60760500  |
| -32     | HGC6.3    | 0 | 40901  | KIF25     | 0 | chr6  | 168120500 |
| -532    | HGC6.3    | 0 | 40401  | KIF25     | 0 | chr6  | 168121000 |
| -1032   | HGC6.3    | 0 | 39901  | KIF25     | 0 | chr6  | 168121500 |
| -1532   | HGC6.3    | 0 | 39401  | KIF25     | 0 | chr6  | 168122000 |
| 6227    | C15orf39  | 0 | 4063   | C15orf39  | 0 | chr15 | 73287500  |
| 6727    | C15orf39  | 0 | 3563   | C15orf39  | 0 | chr15 | 73288000  |
| -199372 | ZNF267    | 0 | 34609  | HERC2P4   | 0 | chr16 | 32035500  |
| -212    | MAMSTR    | 0 | 653    | RASIP1    | 0 | chr19 | 53915000  |

|         |           |   |        |          |   |       |           |
|---------|-----------|---|--------|----------|---|-------|-----------|
| 2277    | GPR162    | 0 | 3344   | GPR162   | 0 | chr12 | 6803500   |
| 2777    | GPR162    | 0 | 2844   | GPR162   | 0 | chr12 | 6804000   |
| 31692   | PLEC      | 0 | 28531  | PLEC     | 0 | chr8  | 145093000 |
| -40178  | ERN2      | 0 | 948    | CHP2     | 0 | chr16 | 23672500  |
| -40678  | ERN2      | 0 | 448    | CHP2     | 0 | chr16 | 23673000  |
| 4397    | SLC45A3   | 0 | 18253  | SLC45A3  | 0 | chr1  | 203898000 |
| -55337  | LMBR1     | 0 | 1177   | NOM1     | 0 | chr7  | 156434000 |
| -55837  | LMBR1     | 0 | 677    | NOM1     | 0 | chr7  | 156434500 |
| -82121  | PDE4DIP   | 0 | 19263  | SEC22B   | 0 | chr1  | 143788500 |
| -82621  | PDE4DIP   | 0 | 18763  | SEC22B   | 0 | chr1  | 143789000 |
| 7284    | NOTCH1    | 0 | 44059  | NOTCH1   | 0 | chr9  | 138516000 |
| 44716   | SLIT1     | 0 | 143173 | SLIT1    | 0 | chr10 | 98792500  |
| 45216   | SLIT1     | 0 | 142673 | SLIT1    | 0 | chr10 | 98793000  |
| 45716   | SLIT1     | 0 | 142173 | SLIT1    | 0 | chr10 | 98793500  |
| 152     | SLC25A11  | 0 | 2563   | SLC25A11 | 0 | chr17 | 4781500   |
| 20013   | AZI1      | 0 | 13346  | AZI1     | 0 | chr17 | 76798000  |
| 20513   | AZI1      | 0 | 12846  | AZI1     | 0 | chr17 | 76798500  |
| 39507   | MRC2      | 0 | 26684  | MRC2     | 0 | chr17 | 58098000  |
| -63056  | IGFBPL1   | 0 | 133584 | FAM201A  | 0 | chr9  | 38477500  |
| -63556  | IGFBPL1   | 0 | 133084 | FAM201A  | 0 | chr9  | 38478000  |
| 12181   | MAP2K2    | 0 | 21626  | MAP2K2   | 0 | chr19 | 4053500   |
| -114889 | EPHA6     | 0 | 1284   | ARL6     | 0 | chr3  | 98965000  |
| 8683    | BCL3      | 0 | 2641   | BCL3     | 0 | chr19 | 49952500  |
| 9183    | BCL3      | 0 | 2141   | BCL3     | 0 | chr19 | 49953000  |
| -13578  | COLEC11   | 0 | 160    | ALLC     | 0 | chr2  | 3683500   |
| 317     | DEF8      | 0 | 18968  | DEF8     | 0 | chr16 | 88543000  |
| 817     | DEF8      | 0 | 18468  | DEF8     | 0 | chr16 | 88543500  |
| 43903   | METT10D   | 0 | 51950  | METT10D  | 0 | chr17 | 2310000   |
| 44403   | METT10D   | 0 | 51450  | METT10D  | 0 | chr17 | 2310500   |
| -177838 | MGC45800  | 0 | 1630   | ODZ3     | 0 | chr4  | 183480500 |
| -1626   | PNPLA8    | 0 | 34406  | THAP5    | 0 | chr7  | 107955500 |
| -47323  | AP3S1     | 0 | 1049   | AQPEP    | 0 | chr5  | 115325000 |
| 1806    | APLF      | 0 | 110797 | APLF     | 0 | chr2  | 68550000  |
| 1008    | ISM2      | 0 | 23463  | ISM2     | 0 | chr14 | 77011500  |
| 1508    | ISM2      | 0 | 22963  | ISM2     | 0 | chr14 | 77012000  |
| -384    | ACSS1     | 0 | 16098  | VSX1     | 0 | chr20 | 24988000  |
| 1348    | DUS3L     | 0 | 4690   | DUS3L    | 0 | chr19 | 5737500   |
| 1848    | DUS3L     | 0 | 4190   | DUS3L    | 0 | chr19 | 5738000   |
| -9862   | UBA2      | 0 | 2219   | WTIP     | 0 | chr19 | 39662500  |
| 1817    | TDGF1     | 0 | 2956   | TDGF1    | 0 | chr3  | 46596000  |
| -69561  | LOC348840 | 0 | 2133   | FAM157A  | 0 | chr3  | 199361500 |
| 43486   | ZFPM1     | 0 | 38075  | ZFPM1    | 0 | chr16 | 87091000  |
| 43986   | ZFPM1     | 0 | 37575  | ZFPM1    | 0 | chr16 | 87091500  |
| -228    | PLXND1    | 0 | 40824  | TMCC1    | 0 | chr3  | 130808500 |
| 85874   | SCARB1    | 0 | 472    | SCARB1   | 0 | chr12 | 123914000 |
| -28     | SCARB1    | 0 | 47644  | UBC      | 0 | chr12 | 123914500 |
| 471     | KLHL34    | 0 | 2369   | KLHL34   | 0 | chrX  | 21584000  |
| 971     | KLHL34    | 0 | 1869   | KLHL34   | 0 | chrX  | 21584500  |
| -59691  | SP3       | 0 | 47420  | OLA1     | 0 | chr2  | 174598000 |
| -60191  | SP3       | 0 | 46920  | OLA1     | 0 | chr2  | 174598500 |
| -60691  | SP3       | 0 | 46420  | OLA1     | 0 | chr2  | 174599000 |
| -1018   | BEND7     | 0 | 82944  | PRPF18   | 0 | chr10 | 13586000  |
| 230     | CASS4     | 0 | 46243  | CASS4    | 0 | chr20 | 54421000  |
| 3185    | PITPNM1   | 0 | 10419  | PITPNM1  | 0 | chr11 | 67019000  |
| 5996    | LFNG      | 0 | 3336   | LFNG     | 0 | chr7  | 2532000   |
| 6496    | LFNG      | 0 | 2836   | LFNG     | 0 | chr7  | 2532500   |
| -37512  | TCP10     | 0 | 172569 | C6orf123 | 0 | chr6  | 167755500 |
| 2264    | C9orf139  | 0 | 7055   | C9orf139 | 0 | chr9  | 139044000 |

|         |              |   |        |            |   |       |           |
|---------|--------------|---|--------|------------|---|-------|-----------|
| 489     | UGT1A3       | 0 | 43684  | UGT1A3     | 0 | chr2  | 234303000 |
| -789    | NUP133       | 0 | 7451   | ABCB10     | 0 | chr1  | 227711500 |
| -83180  | PIGG         | 0 | 2862   | PDE6B      | 0 | chr4  | 606500    |
| -83680  | PIGG         | 0 | 2362   | PDE6B      | 0 | chr4  | 607000    |
| 92      | CASQ1        | 0 | 11298  | CASQ1      | 0 | chr1  | 158427000 |
| -268776 | TMEM174      | 0 | 2340   | FOXD1      | 0 | chr5  | 72775500  |
| -269276 | TMEM174      | 0 | 1840   | FOXD1      | 0 | chr5  | 72776000  |
| 6490    | ZNF628       | 0 | 1666   | ZNF628     | 0 | chr19 | 60686000  |
| 1681    | SNAP47       | 0 | 44555  | SNAP47     | 0 | chr1  | 225991000 |
| 47781   | ZDHHC11      | 0 | 7601   | ZDHHC11    | 0 | chr5  | 896500    |
| 72890   | FLJ43860     | 0 | 512    | FLJ43860   | 0 | chr8  | 142586000 |
| 73390   | FLJ43860     | 0 | 12     | FLJ43860   | 0 | chr8  | 142586500 |
| -488    | FLJ43860     | 0 | 690623 | NCRNA00051 | 0 | chr8  | 142587000 |
| 1037    | MGC16025     | 0 | 1090   | MGC16025   | 0 | chr2  | 239781000 |
| 1537    | MGC16025     | 0 | 590    | MGC16025   | 0 | chr2  | 239781500 |
| 133523  | RAPGEF1      | 0 | 27246  | RAPGEF1    | 0 | chr9  | 133575500 |
| 6631    | GALNT9       | 0 | 3026   | GALNT9     | 0 | chr12 | 131253500 |
| 7631    | GALNT9       | 0 | 2026   | GALNT9     | 0 | chr12 | 131254500 |
| 8104    | TMEM184A     | 0 | 6092   | TMEM184A   | 0 | chr7  | 1556500   |
| 8604    | TMEM184A     | 0 | 5592   | TMEM184A   | 0 | chr7  | 1557000   |
| 9104    | TMEM184A     | 0 | 5092   | TMEM184A   | 0 | chr7  | 1557500   |
| 23428   | ADARB2       | 0 | 528218 | ADARB2     | 0 | chr10 | 1241500   |
| -217    | TRIM7        | 0 | 17911  | TRIM41     | 0 | chr5  | 180565000 |
| -717    | TRIM7        | 0 | 17411  | TRIM41     | 0 | chr5  | 180565500 |
| 1486    | C14orf174    | 0 | 12340  | C14orf174  | 0 | chr14 | 76915000  |
| 5925    | SOHLH1       | 0 | 195    | SOHLH1     | 0 | chr9  | 137731000 |
| -3980   | ZIC2         | 0 | 98337  | PCCA       | 0 | chr13 | 99441000  |
| -27209  | TMEM183B     | 0 | 433    | PPFIA4     | 0 | chr1  | 201286500 |
| 51991   | ABR          | 0 | 131866 | ABR        | 0 | chr17 | 905500    |
| -9384   | B4GALNT4     | 0 | 2716   | PKP3       | 0 | chr11 | 381500    |
| -9884   | B4GALNT4     | 0 | 2216   | PKP3       | 0 | chr11 | 382000    |
| -10384  | B4GALNT4     | 0 | 1716   | PKP3       | 0 | chr11 | 382500    |
| -1853   | GALE         | 0 | 453    | HMGCL      | 0 | chr1  | 24000500  |
| 47      | HMGCL        | 0 | 23536  | HMGCL      | 0 | chr1  | 24001000  |
| 66233   | CBFA2T3      | 0 | 109    | CBFA2T3    | 0 | chr16 | 87535000  |
| -391    | CBFA2T3      | 0 | 152254 | ACSF3      | 0 | chr16 | 87535500  |
| -891    | CBFA2T3      | 0 | 151754 | ACSF3      | 0 | chr16 | 87536000  |
| -1349   | PTK6         | 0 | 2106   | SRMS       | 0 | chr20 | 61640500  |
| -24788  | IRF8         | 0 | 384456 | LOC732275  | 0 | chr16 | 84538500  |
| -25788  | IRF8         | 0 | 383456 | LOC732275  | 0 | chr16 | 84539500  |
| 24918   | C6orf147     | 0 | 11309  | C6orf147   | 0 | chr6  | 74065500  |
| 25418   | C6orf147     | 0 | 10809  | C6orf147   | 0 | chr6  | 74066000  |
| 28035   | XKR7         | 0 | 2417   | XKR7       | 0 | chr20 | 30047500  |
| 28535   | XKR7         | 0 | 1917   | XKR7       | 0 | chr20 | 30048000  |
| -66701  | SCUBE1       | 0 | 1963   | MPPED1     | 0 | chr22 | 42136000  |
| -67201  | SCUBE1       | 0 | 1463   | MPPED1     | 0 | chr22 | 42136500  |
| -121231 | LOC100133920 | 0 | 389526 | FOXD4L5    | 0 | chr9  | 69076000  |
| -121731 | LOC100133920 | 0 | 389026 | FOXD4L5    | 0 | chr9  | 69076500  |
| -122231 | LOC100133920 | 0 | 388526 | FOXD4L5    | 0 | chr9  | 69077000  |
| -843    | SNX3         | 0 | 32790  | LACE1      | 0 | chr6  | 108690000 |
| 20976   | TTC38        | 0 | 5069   | TTC38      | 0 | chr22 | 45063500  |
| -806    | LRRN4        | 0 | 19991  | FERMT1     | 0 | chr20 | 5983500   |
| 1205    | ALPPL2       | 0 | 2669   | ALPPL2     | 0 | chr2  | 232981000 |
| -1830   | PSG7         | 0 | 68648  | PSG11      | 0 | chr19 | 48135000  |
| 17509   | TMIGD1       | 0 | 191    | TMIGD1     | 0 | chr17 | 25685000  |
| -309    | TMIGD1       | 0 | 44609  | CPD        | 0 | chr17 | 25685500  |
| 4192    | CDC37        | 0 | 8271   | CDC37      | 0 | chr19 | 10367000  |
| 4692    | CDC37        | 0 | 7771   | CDC37      | 0 | chr19 | 10367500  |

|         |           |   |        |           |   |       |           |
|---------|-----------|---|--------|-----------|---|-------|-----------|
| 5192    | CDC37     | 0 | 7271   | CDC37     | 0 | chr19 | 10368000  |
| 746     | C16orf79  | 0 | 1012   | C16orf79  | 0 | chr16 | 2200000   |
| 1246    | C16orf79  | 0 | 512    | C16orf79  | 0 | chr16 | 2200500   |
| 1746    | C16orf79  | 0 | 12     | C16orf79  | 0 | chr16 | 2201000   |
| 5653    | ASMT      | 0 | 41974  | ASMT      | 0 | chrX  | 1680000   |
| 6153    | ASMT      | 0 | 41474  | ASMT      | 0 | chrX  | 1680500   |
| 2412    | RUNX3     | 0 | 28357  | RUNX3     | 0 | chr1  | 25101000  |
| 2912    | RUNX3     | 0 | 27857  | RUNX3     | 0 | chr1  | 25101500  |
| -37713  | C10orf57  | 0 | 2237   | PLAC9     | 0 | chr10 | 81880000  |
| 96877   | KDM4B     | 0 | 87608  | KDM4B     | 0 | chr19 | 5017000   |
| 60119   | LRRC2     | 0 | 4576   | LRRC2     | 0 | chr3  | 46592000  |
| -47     | MRPL12    | 0 | 4775   | SLC25A10  | 0 | chr17 | 77285000  |
| 19784   | NOTCH1    | 0 | 31559  | NOTCH1    | 0 | chr9  | 138528500 |
| 20284   | NOTCH1    | 0 | 31059  | NOTCH1    | 0 | chr9  | 138529000 |
| -16515  | CBX8      | 0 | 19549  | CBX4      | 0 | chr17 | 75402000  |
| -1088   | C9        | 0 | 6036   | DAB2      | 0 | chr5  | 39401500  |
| 13851   | NLRX1     | 0 | 1436   | NLRX1     | 0 | chr11 | 118558500 |
| -6897   | SLC35E2B  | 0 | 237    | MMP23A    | 0 | chr1  | 1621000   |
| 263     | MMP23A    | 0 | 1607   | MMP23A    | 0 | chr1  | 1621500   |
| -30210  | FLJ42393  | 0 | 1914   | LPP       | 0 | chr3  | 189411500 |
| -5493   | DOK7      | 0 | 12587  | LRPAP1    | 0 | chr4  | 3471500   |
| -5993   | DOK7      | 0 | 12087  | LRPAP1    | 0 | chr4  | 3472000   |
| 3180    | TRIM35    | 0 | 23251  | TRIM35    | 0 | chr8  | 27201500  |
| 16991   | ABR       | 0 | 166866 | ABR       | 0 | chr17 | 870500    |
| -155    | C1orf127  | 0 | 48265  | TARDBP    | 0 | chr1  | 10947000  |
| 59058   | ADARB1    | 0 | 92902  | ADARB1    | 0 | chr21 | 45378000  |
| 59558   | ADARB1    | 0 | 92402  | ADARB1    | 0 | chr21 | 45378500  |
| -108619 | RNF4      | 0 | 956    | FAM193A   | 0 | chr4  | 2596000   |
| -92280  | TP53TG3   | 0 | 996802 | UBE2MP1   | 0 | chr16 | 33264500  |
| -9742   | CXCR2P1   | 0 | 2284   | RUFY4     | 0 | chr2  | 218644000 |
| -10242  | CXCR2P1   | 0 | 1784   | RUFY4     | 0 | chr2  | 218644500 |
| -792    | WDR85     | 0 | 2351   | ZMYND19   | 0 | chr9  | 139594000 |
| 6177    | HSPG2     | 0 | 108837 | HSPG2     | 0 | chr1  | 22027500  |
| 6677    | HSPG2     | 0 | 108337 | HSPG2     | 0 | chr1  | 22028000  |
| 1928    | PEG10     | 0 | 11442  | PEG10     | 0 | chr7  | 94125500  |
| 118361  | PRDM11    | 0 | 12979  | PRDM11    | 0 | chr11 | 45190500  |
| 118861  | PRDM11    | 0 | 12479  | PRDM11    | 0 | chr11 | 45191000  |
| 306     | PTPN6     | 0 | 9740   | PTPN6     | 0 | chr12 | 6931000   |
| -4546   | LOC650368 | 0 | 212789 | TRPC2     | 0 | chr11 | 3391500   |
| -5046   | LOC650368 | 0 | 212289 | TRPC2     | 0 | chr11 | 3392000   |
| -16648  | ASB10     | 0 | 3355   | ABCF2     | 0 | chr7  | 150532500 |
| 2798    | EGFL7     | 0 | 6951   | EGFL7     | 0 | chr9  | 138680000 |
| -9      | LMAN2     | 0 | 5949   | RGS14     | 0 | chr5  | 176711500 |
| -509    | LMAN2     | 0 | 5449   | RGS14     | 0 | chr5  | 176712000 |
| 48015   | ARHGEF3   | 0 | 303876 | ARHGEF3   | 0 | chr3  | 56784500  |
| 48515   | ARHGEF3   | 0 | 303376 | ARHGEF3   | 0 | chr3  | 56785000  |
| -310    | TMED6     | 0 | 3533   | TERF2     | 0 | chr16 | 67943500  |
| -148    | C2orf81   | 0 | 3892   | WDR54     | 0 | chr2  | 74498500  |
| -156255 | KRTAP11-1 | 0 | 348    | KRTAP19-8 | 0 | chr21 | 31332000  |
| 2228    | LOC148413 | 0 | 288    | LOC148413 | 0 | chr1  | 1327000   |
| -90480  | GOT1      | 0 | 11679  | NKX2-3    | 0 | chr10 | 101271000 |
| 7858    | ASAP3     | 0 | 47837  | ASAP3     | 0 | chr1  | 23635500  |
| 8358    | ASAP3     | 0 | 47337  | ASAP3     | 0 | chr1  | 23636000  |
| 882     | PDIA2     | 0 | 3210   | PDIA2     | 0 | chr16 | 274000    |
| 1382    | PDIA2     | 0 | 2710   | PDIA2     | 0 | chr16 | 274500    |
| -252131 | LOC643955 | 0 | 651015 | ZNF735    | 0 | chr7  | 62654000  |
| -252631 | LOC643955 | 0 | 650515 | ZNF735    | 0 | chr7  | 62654500  |
| -38145  | DUSP22    | 0 | 2251   | IRF4      | 0 | chr6  | 334500    |

|         |           |   |        |          |   |       |           |
|---------|-----------|---|--------|----------|---|-------|-----------|
| 1560    | PTX4      | 0 | 969    | PTX4     | 0 | chr16 | 1477500   |
| 33491   | SAFB2     | 0 | 2438   | SAFB2    | 0 | chr19 | 5571500   |
| 90236   | GLTSCR1   | 0 | 4846   | GLTSCR1  | 0 | chr19 | 52893500  |
| 90736   | GLTSCR1   | 0 | 4346   | GLTSCR1  | 0 | chr19 | 52894000  |
| 18548   | PALM      | 0 | 20830  | PALM     | 0 | chr19 | 678500    |
| 19048   | PALM      | 0 | 20330  | PALM     | 0 | chr19 | 679000    |
| 5289    | KAZ       | 0 | 138738 | KAZ      | 0 | chr1  | 15128500  |
| 618     | KAZ       | 0 | 137738 | KAZ      | 0 | chr1  | 15129500  |
| -32398  | TC2N      | 0 | 507    | FBLN5    | 0 | chr14 | 91405000  |
| 3273    | NPTX1     | 0 | 6499   | NPTX1    | 0 | chr17 | 76058500  |
| -13560  | TCL6      | 0 | 1015   | TCL1B    | 0 | chr14 | 95221500  |
| -57564  | PTCD2     | 0 | 26489  | ZNF366   | 0 | chr5  | 71748500  |
| -58064  | PTCD2     | 0 | 25989  | ZNF366   | 0 | chr5  | 71749000  |
| -58564  | PTCD2     | 0 | 25489  | ZNF366   | 0 | chr5  | 71749500  |
| 25047   | FBXL18    | 0 | 12925  | FBXL18   | 0 | chr7  | 5507000   |
| 56866   | BAHCC1    | 0 | 2953   | BAHCC1   | 0 | chr17 | 77045000  |
| 57366   | BAHCC1    | 0 | 2453   | BAHCC1   | 0 | chr17 | 77045500  |
| -107067 | ZNF92     | 0 | 139711 | INTS4L2  | 0 | chr7  | 64610500  |
| -107567 | ZNF92     | 0 | 139211 | INTS4L2  | 0 | chr7  | 64611000  |
| -108067 | ZNF92     | 0 | 138711 | INTS4L2  | 0 | chr7  | 64611500  |
| 64      | ARHGAP25  | 0 | 51961  | ARHGAP25 | 0 | chr2  | 68855500  |
| 2520    | LTBP4     | 0 | 30065  | LTBP4    | 0 | chr19 | 45797500  |
| 3020    | LTBP4     | 0 | 29565  | LTBP4    | 0 | chr19 | 45798000  |
| 26165   | OTOA      | 0 | 56051  | OTOA     | 0 | chr16 | 21623500  |
| 5899    | ABCA7     | 0 | 19570  | ABCA7    | 0 | chr19 | 997000    |
| 6399    | ABCA7     | 0 | 19070  | ABCA7    | 0 | chr19 | 997500    |
| 6899    | ABCA7     | 0 | 18570  | ABCA7    | 0 | chr19 | 998000    |
| 77622   | BAI1      | 0 | 3370   | BAI1     | 0 | chr8  | 143620000 |
| 78122   | BAI1      | 0 | 2870   | BAI1     | 0 | chr8  | 143620500 |
| 14301   | CHERP     | 0 | 10263  | CHERP    | 0 | chr19 | 16504000  |
| 14801   | CHERP     | 0 | 9763   | CHERP    | 0 | chr19 | 16504500  |
| -63079  | GRM4      | 0 | 40054  | HMGA1    | 0 | chr6  | 34272500  |
| -2037   | DNMT3A    | 0 | 32615  | DTNB     | 0 | chr2  | 25421000  |
| -11150  | LOC650623 | 0 | 219913 | MBL1P    | 0 | chr10 | 81450000  |
| 7035    | BICD2     | 0 | 46404  | BICD2    | 0 | chr9  | 94520500  |
| 7535    | BICD2     | 0 | 45904  | BICD2    | 0 | chr9  | 94521000  |
| 27088   | SMAD3     | 0 | 30086  | SMAD3    | 0 | chr15 | 65244500  |
| 1314    | CDT1      | 0 | 4167   | CDT1     | 0 | chr16 | 87399000  |
| 1814    | CDT1      | 0 | 3667   | CDT1     | 0 | chr16 | 87399500  |
| 1384    | GPR39     | 0 | 228639 | GPR39    | 0 | chr2  | 132892000 |
| -23354  | SPG20     | 0 | 61966  | CCNA1    | 0 | chr13 | 35842000  |
| -942280 | TP53TG3   | 0 | 146802 | UBE2MP1  | 0 | chr16 | 34114500  |
| -942780 | TP53TG3   | 0 | 146302 | UBE2MP1  | 0 | chr16 | 34115000  |
| -6488   | TNNT3     | 0 | 2077   | MRPL23   | 0 | chr11 | 1923000   |
| -45056  | TSNARE1   | 0 | 14878  | BAI1     | 0 | chr8  | 143527500 |
| 17954   | C9orf64   | 0 | 483    | C9orf64  | 0 | chr9  | 85761000  |
| 1837    | ADAL      | 0 | 16906  | ADAL     | 0 | chr15 | 41412000  |
| 10636   | ZDHHC8    | 0 | 3974   | ZDHHC8   | 0 | chr22 | 18510000  |
| 11136   | ZDHHC8    | 0 | 3474   | ZDHHC8   | 0 | chr22 | 18510500  |
| 11636   | ZDHHC8    | 0 | 2974   | ZDHHC8   | 0 | chr22 | 18511000  |
| -453862 | ATG4C     | 0 | 4817   | FOXD3    | 0 | chr1  | 63556500  |
| 15626   | NCLN      | 0 | 8073   | NCLN     | 0 | chr19 | 3152500   |
| 16512   | ZNF331    | 0 | 42835  | ZNF331   | 0 | chr19 | 58732500  |
| -119169 | FOXF2     | 0 | 95679  | FOXC1    | 0 | chr6  | 1460000   |
| -119669 | FOXF2     | 0 | 95179  | FOXC1    | 0 | chr6  | 1460500   |
| -610    | GCC1      | 0 | 2252   | ARF5     | 0 | chr7  | 127013500 |
| -37775  | TGM3      | 0 | 2053   | TGM6     | 0 | chr20 | 2307500   |
| 85760   | CLIP2     | 0 | 30709  | CLIP2    | 0 | chr7  | 73427500  |



|         |            |   |        |            |   |       |           |
|---------|------------|---|--------|------------|---|-------|-----------|
| 86760   | CLIP2      | 0 | 29709  | CLIP2      | 0 | chr7  | 73428500  |
| 1105    | SCAMP3     | 0 | 5319   | SCAMP3     | 0 | chr1  | 153493500 |
| -1432   | TSPAN3     | 0 | 35525  | SGK269     | 0 | chr15 | 75152000  |
| 7479    | ADAMTSL4   | 0 | 1847   | ADAMTSL4   | 0 | chr1  | 148796000 |
| 7979    | ADAMTSL4   | 0 | 1347   | ADAMTSL4   | 0 | chr1  | 148796500 |
| 26887   | PLCH2      | 0 | 2324   | PLCH2      | 0 | chr1  | 2424500   |
| -1256   | PRKCQ      | 0 | 580754 | SFMBT2     | 0 | chr10 | 6663500   |
| -1756   | PRKCQ      | 0 | 580254 | SFMBT2     | 0 | chr10 | 6664000   |
| 1062    | C6orf201   | 0 | 50498  | C6orf201   | 0 | chr6  | 4025500   |
| 1516    | C16orf90   | 0 | 422    | C16orf90   | 0 | chr16 | 3485000   |
| -78     | C16orf90   | 0 | 5463   | CLUAP1     | 0 | chr16 | 3485500   |
| -112113 | SLC44A5    | 0 | 1130   | ACADM      | 0 | chr1  | 75961500  |
| -344    | TGFB1      | 0 | 161    | B9D2       | 0 | chr19 | 46552000  |
| 339     | B9D2       | 0 | 9418   | B9D2       | 0 | chr19 | 46552500  |
| -7795   | DES        | 0 | 443    | SPEG       | 0 | chr2  | 220007500 |
| 3239    | TRMT61A    | 0 | 4663   | TRMT61A    | 0 | chr14 | 103068500 |
| 3739    | TRMT61A    | 0 | 4163   | TRMT61A    | 0 | chr14 | 103069000 |
| 62700   | HDAC4      | 0 | 290080 | HDAC4      | 0 | chr2  | 239697500 |
| 7058    | IL17F      | 0 | 757    | IL17F      | 0 | chr6  | 52216500  |
| 7558    | IL17F      | 0 | 257    | IL17F      | 0 | chr6  | 52217000  |
| 9748    | GPSM1      | 0 | 22378  | GPSM1      | 0 | chr9  | 138351500 |
| -141433 | SSBP3      | 0 | 488    | ACOT11     | 0 | chr1  | 54786000  |
| -56394  | USP40      | 0 | 29     | UGT1A8     | 0 | chr2  | 234191000 |
| 471     | UGT1A8     | 0 | 155184 | UGT1A8     | 0 | chr2  | 234191500 |
| 8414    | CC2D2A     | 0 | 123278 | CC2D2A     | 0 | chr4  | 15089000  |
| 25907   | ZMYM5      | 0 | 276    | ZMYM5      | 0 | chr13 | 19335500  |
| -70831  | LDOC1L     | 0 | 382    | NCRNA00207 | 0 | chr22 | 43343500  |
| 118     | NCRNA00207 | 0 | 2993   | NCRNA00207 | 0 | chr22 | 43344000  |
| 16093   | GNA11      | 0 | 10954  | GNA11      | 0 | chr19 | 3061500   |
| -198083 | ANKRD10    | 0 | 2124   | ARHGEF7    | 0 | chr13 | 110563500 |
| -142416 | TMEM121    | 0 | 244882 | KIAA0125   | 0 | chr14 | 105210000 |
| 249791  | DPP6       | 0 | 686428 | DPP6       | 0 | chr7  | 153630500 |
| 250291  | DPP6       | 0 | 685928 | DPP6       | 0 | chr7  | 153631000 |
| 250791  | DPP6       | 0 | 685428 | DPP6       | 0 | chr7  | 153631500 |
| 25679   | ZBTB46     | 0 | 35300  | ZBTB46     | 0 | chr20 | 61872000  |
| 19609   | MLLT1      | 0 | 49959  | MLLT1      | 0 | chr19 | 6181000   |
| 20109   | MLLT1      | 0 | 49459  | MLLT1      | 0 | chr19 | 6181500   |
| -9583   | STK11IP    | 0 | 1535   | SLC4A3     | 0 | chr2  | 220199000 |
| 1253    | C9orf69    | 0 | 3052   | C9orf69    | 0 | chr9  | 138147500 |
| 1753    | C9orf69    | 0 | 2552   | C9orf69    | 0 | chr9  | 138148000 |
| 69401   | KIAA1529   | 0 | 69390  | KIAA1529   | 0 | chr9  | 99110000  |
| 507     | PRM2       | 0 | 338    | PRM2       | 0 | chr16 | 11277500  |
| 78076   | CRTC1      | 0 | 20643  | CRTC1      | 0 | chr19 | 18733500  |
| 78576   | CRTC1      | 0 | 20143  | CRTC1      | 0 | chr19 | 18734000  |
| 79076   | CRTC1      | 0 | 19643  | CRTC1      | 0 | chr19 | 18734500  |
| 1354    | MGAT1      | 0 | 18243  | MGAT1      | 0 | chr5  | 180151500 |
| 1854    | MGAT1      | 0 | 17743  | MGAT1      | 0 | chr5  | 180152000 |
| -382    | GK5        | 0 | 80638  | XRN1       | 0 | chr3  | 143427500 |
| 2456    | SLC25A6    | 0 | 3498   | SLC25A6    | 0 | chrX  | 1467500   |
| -2080   | TRPV1      | 0 | 13304  | SHPK       | 0 | chr17 | 3445000   |
| -11628  | LIG1       | 0 | 26154  | CARD8      | 0 | chr19 | 53377000  |
| -12128  | LIG1       | 0 | 25654  | CARD8      | 0 | chr19 | 53377500  |
| -4676   | FAM20B     | 0 | 734    | TOR3A      | 0 | chr1  | 177317000 |
| -668604 | LOC339788  | 0 | 36563  | ID2        | 0 | chr2  | 8703000   |
| -279    | CFC1B      | 0 | 80092  | C2orf14    | 0 | chr2  | 131074000 |
| -779    | CFC1B      | 0 | 79592  | C2orf14    | 0 | chr2  | 131074500 |
| 8717    | STRA6      | 0 | 5924   | STRA6      | 0 | chr15 | 72282500  |
| -949    | CH25H      | 0 | 5305   | LIPA       | 0 | chr10 | 90958000  |

|         |            |   |        |            |   |       |           |
|---------|------------|---|--------|------------|---|-------|-----------|
| 50103   | C4orf22    | 0 | 577926 | C4orf22    | 0 | chr4  | 81526000  |
| 50603   | C4orf22    | 0 | 577426 | C4orf22    | 0 | chr4  | 81526500  |
| 917990  | PTPRN2     | 0 | 130743 | PTPRN2     | 0 | chr7  | 157942500 |
| 918490  | PTPRN2     | 0 | 130243 | PTPRN2     | 0 | chr7  | 157943000 |
| -25145  | AGRN       | 0 | 560    | C1orf159   | 0 | chr1  | 1006500   |
| -25645  | AGRN       | 0 | 60     | C1orf159   | 0 | chr1  | 1007000   |
| 1485    | PHLDB1     | 0 | 48951  | PHLDB1     | 0 | chr11 | 117985000 |
| 128     | PLEKHG4B   | 0 | 49587  | PLEKHG4B   | 0 | chr5  | 193500    |
| 70430   | SVOPL      | 0 | 14330  | SVOPL      | 0 | chr7  | 138000000 |
| -1278   | C14orf176  | 0 | 49935  | OR5AU1     | 0 | chr14 | 20643000  |
| -36794  | MUC6       | 0 | 1374   | MUC2       | 0 | chr11 | 1063500   |
| -37294  | MUC6       | 0 | 874    | MUC2       | 0 | chr11 | 1064000   |
| 26548   | PALM       | 0 | 12830  | PALM       | 0 | chr19 | 686500    |
| 27548   | PALM       | 0 | 11830  | PALM       | 0 | chr19 | 687500    |
| 4015    | ST6GALNAC4 | 0 | 5126   | ST6GALNAC4 | 0 | chr9  | 129714000 |
| 4515    | ST6GALNAC4 | 0 | 4626   | ST6GALNAC4 | 0 | chr9  | 129714500 |
| -2250   | ---        | 0 | 227    | CTBP1      | 0 | chr4  | 1195000   |
| -43109  | SNTG2      | 0 | 2741   | TPO        | 0 | chr2  | 1393500   |
| 69976   | ACVR1C     | 0 | 818    | ACVR1C     | 0 | chr2  | 158161500 |
| 341897  | PRDM16     | 0 | 27545  | PRDM16     | 0 | chr1  | 3317500   |
| -877    | PON3       | 0 | 7609   | PON2       | 0 | chr7  | 94864500  |
| -2176   | HDAC6      | 0 | 1726   | ERAS       | 0 | chrX  | 48570500  |
| -2676   | HDAC6      | 0 | 1226   | ERAS       | 0 | chrX  | 48571000  |
| 131651  | LOC91948   | 0 | 163    | LOC91948   | 0 | chr15 | 96218500  |
| -1842   | TBXA2R     | 0 | 2126   | C19orf29   | 0 | chr19 | 3559500   |
| 3316    | C5orf40    | 0 | 807    | C5orf40    | 0 | chr5  | 156704500 |
| 3816    | C5orf40    | 0 | 307    | C5orf40    | 0 | chr5  | 156705000 |
| 3590    | XAB2       | 0 | 6439   | XAB2       | 0 | chr19 | 7594000   |
| 4090    | XAB2       | 0 | 5939   | XAB2       | 0 | chr19 | 7594500   |
| -5496   | NNAT       | 0 | 164847 | CTNNBL1    | 0 | chr20 | 35591000  |
| -5996   | NNAT       | 0 | 164347 | CTNNBL1    | 0 | chr20 | 35591500  |
| -169303 | VEZT       | 0 | 1952   | METAP2     | 0 | chr12 | 94390000  |
| 17907   | SIGLEC5    | 0 | 1039   | SIGLEC5    | 0 | chr19 | 56824500  |
| -567    | C10orf113  | 0 | 347426 | C10orf114  | 0 | chr10 | 21476000  |
| -119301 | ORC5L      | 0 | 1339   | LHFPL3     | 0 | chr7  | 103755000 |
| -119801 | ORC5L      | 0 | 839    | LHFPL3     | 0 | chr7  | 103755500 |
| -62891  | EIF2AK3    | 0 | 1290   | RPIA       | 0 | chr2  | 88771000  |
| 1985    | PHLDB1     | 0 | 48451  | PHLDB1     | 0 | chr11 | 117985500 |
| 2485    | PHLDB1     | 0 | 47951  | PHLDB1     | 0 | chr11 | 117986000 |
| 617     | KIAA0467   | 0 | 28891  | KIAA0467   | 0 | chr1  | 43662000  |
| 3869    | UCKL1      | 0 | 12712  | UCKL1      | 0 | chr20 | 62045500  |
| 4369    | UCKL1      | 0 | 12212  | UCKL1      | 0 | chr20 | 62046000  |
| 4869    | UCKL1      | 0 | 11712  | UCKL1      | 0 | chr20 | 62046500  |
| 12738   | SALL3      | 0 | 5181   | SALL3      | 0 | chr18 | 74854000  |
| 13238   | SALL3      | 0 | 4681   | SALL3      | 0 | chr18 | 74854500  |
| 2734    | LOC283731  | 0 | 172    | LOC283731  | 0 | chr15 | 72208500  |
| -108408 | GRIP2      | 0 | 1256   | C3orf19    | 0 | chr3  | 14667000  |
| -1648   | ARFGAP3    | 0 | 11880  | PACSIN2    | 0 | chr22 | 41585000  |
| -534    | PLCB2      | 0 | 22944  | C15orf52   | 0 | chr15 | 38388000  |
| 3348    | TPSG1      | 0 | 255    | TPSG1      | 0 | chr16 | 1215000   |
| -1245   | TPSG1      | 0 | 1836   | TPSB2      | 0 | chr16 | 1216500   |
| -59026  | ZDHHC8     | 0 | 854    | LOC150197  | 0 | chr22 | 18573000  |
| -59526  | ZDHHC8     | 0 | 354    | LOC150197  | 0 | chr22 | 18573500  |
| -20939  | PHF21A     | 0 | 135303 | CREB3L1    | 0 | chr11 | 46120500  |
| 6460    | SLC35E2    | 0 | 7291   | SLC35E2    | 0 | chr1  | 1660000   |
| 6960    | SLC35E2    | 0 | 6791   | SLC35E2    | 0 | chr1  | 1660500   |
| 7460    | SLC35E2    | 0 | 6291   | SLC35E2    | 0 | chr1  | 1661000   |
| 595     | AVPR1B     | 0 | 6605   | AVPR1B     | 0 | chr1  | 204391500 |

|         |          |   |        |              |   |       |           |
|---------|----------|---|--------|--------------|---|-------|-----------|
| 41001   | JPH3     | 0 | 54262  | JPH3         | 0 | chr16 | 86235000  |
| -19043  | DUSP23   | 0 | 796    | FCRL6        | 0 | chr1  | 158038000 |
| -224737 | LHX2     | 0 | 63     | NEK6         | 0 | chr9  | 126060000 |
| -2896   | FGF22    | 0 | 1025   | RNF126       | 0 | chr19 | 597500    |
| -59791  | COMMD1   | 0 | 265    | B3GNT2       | 0 | chr2  | 62276500  |
| 235     | B3GNT2   | 0 | 28370  | B3GNT2       | 0 | chr2  | 62277000  |
| 545547  | CDH4     | 0 | 139194 | CDH4         | 0 | chr20 | 59806500  |
| 546047  | CDH4     | 0 | 138694 | CDH4         | 0 | chr20 | 59807000  |
| -32638  | PRR25    | 0 | 7134   | LMF1         | 0 | chr16 | 836500    |
| -2119   | THUMPD2  | 0 | 330789 | SLC8A1       | 0 | chr2  | 39862000  |
| 15817   | DEF8     | 0 | 3468   | DEF8         | 0 | chr16 | 88558500  |
| 1800    | PSRC1    | 0 | 1794   | PSRC1        | 0 | chr1  | 109625500 |
| 2300    | PSRC1    | 0 | 1294   | PSRC1        | 0 | chr1  | 109626000 |
| -100026 | DSCR8    | 0 | 33     | KCNJ15       | 0 | chr21 | 38550500  |
| -307827 | FHIT     | 0 | 2282   | PTPRG        | 0 | chr3  | 61520000  |
| -308327 | FHIT     | 0 | 1782   | PTPRG        | 0 | chr3  | 61520500  |
| 1561    | ABHD8    | 0 | 9782   | ABHD8        | 0 | chr19 | 17265500  |
| 28917   | NFIX     | 0 | 74110  | NFIX         | 0 | chr19 | 12996500  |
| 29417   | NFIX     | 0 | 73610  | NFIX         | 0 | chr19 | 12997000  |
| 23922   | ADAMTS15 | 0 | 926    | ADAMTS15     | 0 | chr11 | 129848000 |
| 24422   | ADAMTS15 | 0 | 426    | ADAMTS15     | 0 | chr11 | 129848500 |
| -2048   | TNFRSF18 | 0 | 2568   | TNFRSF4      | 0 | chr1  | 1134000   |
| -84447  | DMRT2    | 0 | 873341 | SMARCA2      | 0 | chr9  | 1132000   |
| 472     | CSNK1D   | 0 | 28862  | CSNK1D       | 0 | chr17 | 77796000  |
| 972     | CSNK1D   | 0 | 28362  | CSNK1D       | 0 | chr17 | 77796500  |
| 13540   | COL6A2   | 0 | 21191  | COL6A2       | 0 | chr21 | 46356000  |
| 14040   | COL6A2   | 0 | 20691  | COL6A2       | 0 | chr21 | 46356500  |
| 14540   | COL6A2   | 0 | 20191  | COL6A2       | 0 | chr21 | 46357000  |
| 66687   | NFATC1   | 0 | 62311  | NFATC1       | 0 | chr18 | 75328000  |
| -23506  | CYP1A2   | 0 | 1977   | CSK          | 0 | chr15 | 72859500  |
| -24006  | CYP1A2   | 0 | 1477   | CSK          | 0 | chr15 | 72860000  |
| 300     | GALP     | 0 | 9456   | GALP         | 0 | chr19 | 61379500  |
| -27933  | MRAS     | 0 | 1104   | ESYT3        | 0 | chr3  | 139635000 |
| 13910   | TRIM62   | 0 | 22758  | TRIM62       | 0 | chr1  | 33397500  |
| 14410   | TRIM62   | 0 | 22258  | TRIM62       | 0 | chr1  | 33398000  |
| 49748   | CARM1    | 0 | 1448   | CARM1        | 0 | chr19 | 10893000  |
| 39282   | IQSEC1   | 0 | 30960  | IQSEC1       | 0 | chr3  | 12953000  |
| 177     | C1orf177 | 0 | 36025  | C1orf177     | 0 | chr1  | 55044500  |
| -8395   | FADS1    | 0 | 2788   | FADS2        | 0 | chr11 | 61349500  |
| -1340   | GALC     | 0 | 10248  | GPR65        | 0 | chr14 | 87531000  |
| 397281  | RPTOR    | 0 | 24268  | RPTOR        | 0 | chr17 | 76530500  |
| 68892   | SMC1B    | 0 | 664    | SMC1B        | 0 | chr22 | 44187500  |
| 987     | RRP7A    | 0 | 6252   | RRP7A        | 0 | chr22 | 41239500  |
| 1487    | RRP7A    | 0 | 5752   | RRP7A        | 0 | chr22 | 41240000  |
| 1826    | RFX2     | 0 | 115664 | RFX2         | 0 | chr19 | 5946000   |
| 1827    | METRNL   | 0 | 481    | METRNL       | 0 | chr16 | 707000    |
| -38977  | GPKOW    | 0 | 124    | MAGIX        | 0 | chrX  | 48906000  |
| 7684    | PLXNA3   | 0 | 7678   | PLXNA3       | 0 | chrX  | 153347500 |
| 8184    | PLXNA3   | 0 | 7178   | PLXNA3       | 0 | chrX  | 153348000 |
| -778    | CHM      | 0 | 100110 | DACH2        | 0 | chrX  | 85190000  |
| -12334  | ZNF469   | 0 | 514    | ZFPM1        | 0 | chr16 | 87047000  |
| -12834  | ZNF469   | 0 | 14     | ZFPM1        | 0 | chr16 | 87047500  |
| 59852   | C7orf50  | 0 | 81419  | C7orf50      | 0 | chr7  | 1063000   |
| 20649   | COL18A1  | 0 | 37562  | COL18A1      | 0 | chr21 | 45720500  |
| -17515  | CBX8     | 0 | 18549  | CBX4         | 0 | chr17 | 75403000  |
| -4324   | DIRC2    | 0 | 1049   | LOC100129550 | 0 | chr3  | 124087000 |
| -4824   | DIRC2    | 0 | 549    | LOC100129550 | 0 | chr3  | 124087500 |
| 5784    | DPEP1    | 0 | 19340  | DPEP1        | 0 | chr16 | 88213000  |

|          |                  |   |        |                 |   |       |           |
|----------|------------------|---|--------|-----------------|---|-------|-----------|
| 2506     | CTRB2            | 0 | 573    | CTRB2           | 0 | chr16 | 73798000  |
| 3006     | CTRB2            | 0 | 73     | CTRB2           | 0 | chr16 | 73798500  |
| 3220     | PGLYRP1          | 0 | 663    | PGLYRP1         | 0 | chr19 | 51217500  |
| -341366  | SLC30A8          | 0 | 2645   | MED30           | 0 | chr8  | 118599500 |
| -341866  | SLC30A8          | 0 | 2145   | MED30           | 0 | chr8  | 118600000 |
| -1078083 | SOX2             | 0 | 984    | ATP11B          | 0 | chr3  | 183993000 |
| 14372    | CXorf48          | 0 | 917    | CXorf48         | 0 | chrX  | 134132500 |
| 14872    | CXorf48          | 0 | 417    | CXorf48         | 0 | chrX  | 134133000 |
| 43698    | FCGBP            | 0 | 42873  | FCGBP           | 0 | chr19 | 45089500  |
| 44198    | FCGBP            | 0 | 42373  | FCGBP           | 0 | chr19 | 45090000  |
| -148791  | CCDC74A          | 0 | 40033  | C2orf27A        | 0 | chr2  | 132156500 |
| 54073    | SNED1            | 0 | 41316  | SNED1           | 0 | chr2  | 241641000 |
| 9856     | UBA1             | 0 | 11471  | UBA1            | 0 | chrX  | 46948000  |
| -657     | AK1              | 0 | 6921   | ST6GALNAC6      | 0 | chr9  | 129680500 |
| 17613    | FAM26D           | 0 | 12224  | FAM26D          | 0 | chr6  | 116974500 |
| 18113    | FAM26D           | 0 | 11724  | FAM26D          | 0 | chr6  | 116975000 |
| -2369    | ICMT             | 0 | 5848   | HES3            | 0 | chr1  | 6221000   |
| -9089    | TTY5             | 0 | 893    | RBMV2FP         | 0 | chrY  | 22863500  |
| 9655     | C1QTNF1          | 0 | 15965  | C1QTNF1         | 0 | chr17 | 74541500  |
| 10155    | C1QTNF1          | 0 | 15465  | C1QTNF1         | 0 | chr17 | 74542000  |
| 6167     | PCDHA6           | 0 | 178113 | PCDHA6          | 0 | chr5  | 140194000 |
| 348      | PCDHA7           | 0 | 177613 | PCDHA7          | 0 | chr5  | 140194500 |
| -89187   | XIST             | 0 | 2383   | NCRNA00183      | 0 | chrX  | 73078500  |
| -89687   | XIST             | 0 | 1883   | NCRNA00183      | 0 | chrX  | 73079000  |
| 1829     | FAM123A          | 0 | 1357   | FAM123A         | 0 | chr13 | 24642500  |
| -19051   | EEF1A2           | 0 | 2576   | PPDPF           | 0 | chr20 | 61620000  |
| -19551   | EEF1A2           | 0 | 2076   | PPDPF           | 0 | chr20 | 61620500  |
| 144      | CASZ1            | 0 | 149294 | CASZ1           | 0 | chr1  | 10630000  |
| 644      | CASZ1            | 0 | 148794 | CASZ1           | 0 | chr1  | 10630500  |
| 166465   | ANKRD11          | 0 | 56470  | ANKRD11         | 0 | chr16 | 88028000  |
| -42140   | CXorf49,CXorf49E | 0 | 2864   | Xorf49,CXorf49B | 0 | chrX  | 70897000  |
| -42640   | CXorf49,CXorf49E | 0 | 2364   | Xorf49,CXorf49B | 0 | chrX  | 70897500  |
| 408      | MESP2            | 0 | 1986   | MESP2           | 0 | chr15 | 88121000  |
| 34727    | ZSWIM4           | 0 | 2044   | ZSWIM4          | 0 | chr19 | 13802000  |
| 35227    | ZSWIM4           | 0 | 1544   | ZSWIM4          | 0 | chr19 | 13802500  |
| 121450   | STAT4            | 0 | 170    | STAT4           | 0 | chr2  | 191724000 |
| 279      | VAV1             | 0 | 84371  | VAV1            | 0 | chr19 | 6724000   |
| -398012  | KIF26A           | 0 | 2100   | C14orf180       | 0 | chr14 | 104115000 |
| -398512  | KIF26A           | 0 | 1600   | C14orf180       | 0 | chr14 | 104115500 |
| -301     | SNORA54          | 0 | 36734  | CARS            | 0 | chr11 | 2942000   |
| -2818    | C12orf34         | 0 | 9776   | TRPV4           | 0 | chr12 | 108695500 |
| 3305     | NCKAP5L          | 0 | 33975  | NCKAP5L         | 0 | chr12 | 48474500  |
| 3805     | NCKAP5L          | 0 | 33475  | NCKAP5L         | 0 | chr12 | 48475000  |
| 227      | ATP2B3           | 0 | 46581  | ATP2B3          | 0 | chrX  | 152455000 |
| 143      | ZACN             | 0 | 3480   | ZACN            | 0 | chr17 | 71587000  |
| 1227     | SH3BP5L          | 0 | 14277  | SH3BP5L         | 0 | chr1  | 247072500 |
| 1727     | SH3BP5L          | 0 | 13777  | SH3BP5L         | 0 | chr1  | 247073000 |
| 7298     | EGFL7            | 0 | 2451   | EGFL7           | 0 | chr9  | 138684500 |
| -63530   | POU2F2           | 0 | 2591   | DEDD2           | 0 | chr19 | 47392000  |
| -64030   | POU2F2           | 0 | 2091   | DEDD2           | 0 | chr19 | 47392500  |
| -1831    | ---              | 0 | 48717  | SFTPA1          | 0 | chr10 | 80992000  |
| -2331    | ---              | 0 | 48217  | SFTPA1          | 0 | chr10 | 80992500  |
| 11634    | SH3GL1           | 0 | 28471  | SH3GL1          | 0 | chr19 | 4323000   |
| -137     | GPT              | 0 | 1859   | MFSD3           | 0 | chr8  | 145703500 |
| 64155    | FAT2             | 0 | 698    | FAT2            | 0 | chr5  | 150928000 |
| 4926     | GLI3             | 0 | 271143 | GLI3            | 0 | chr7  | 41972000  |
| -4006    | NR2F2            | 0 | 439182 | SPATA8          | 0 | chr15 | 94688500  |
| -4506    | NR2F2            | 0 | 438682 | SPATA8          | 0 | chr15 | 94689000  |

|          |              |     |         |           |   |       |           |
|----------|--------------|-----|---------|-----------|---|-------|-----------|
| 8142     | DECR2        | 0   | 2488    | DECR2     | 0 | chr16 | 400000    |
| 8642     | DECR2        | 0   | 1988    | DECR2     | 0 | chr16 | 400500    |
| -241968  | LOC100192426 | 0   | 442     | RAB12     | 0 | chr18 | 8599000   |
| 12161    | CROCCP2      | 0   | 488     | CROCCP2   | 0 | chr1  | 16829500  |
| -46334   | RCOR1        | 0   | 568     | TRAF3     | 0 | chr14 | 102313000 |
| 22872    | SPPL2B       | 0   | 3600    | SPPL2B    | 0 | chr19 | 2302500   |
| 24372    | SPPL2B       | 0   | 2100    | SPPL2B    | 0 | chr19 | 2304000   |
| -14280   | GATA2        | 0   | 367     | LOC90246  | 0 | chr3  | 129709000 |
| 133      | LOC90246     | 0   | 2617    | LOC90246  | 0 | chr3  | 129709500 |
| -2540    | C9orf86      | 0   | 687     | C9orf172  | 0 | chr9  | 138858000 |
| -3040    | C9orf86      | 0   | 187     | C9orf172  | 0 | chr9  | 138858500 |
| 1313     | C9orf172     | 0   | 1618    | C9orf172  | 0 | chr9  | 138860000 |
| -348     | PRSS8        | 0   | 2748    | PRSS36    | 0 | chr16 | 31055000  |
| -98359   | PEPD         | 0   | 1700    | CHST8     | 0 | chr19 | 38803000  |
| -98859   | PEPD         | 0   | 1200    | CHST8     | 0 | chr19 | 38803500  |
| -1577429 | TTY23B,TTY23 | 0   | 1346691 | TTY15     | 0 | chrY  | 11937000  |
| 6606     | TFIP11       | 0   | 13937   | TFIP11    | 0 | chr22 | 25224500  |
| -21408   | FBXL14       | 0   | 1482    | WNT5B     | 0 | chr12 | 1595000   |
| -175762  | CACNG3       | 0   | 1408    | RBBP6     | 0 | chr16 | 24457000  |
| -1688    | PPP1R16A     | 0   | 272     | GPT       | 0 | chr8  | 145700000 |
| -1452916 | GALR1        | 0   | 277262  | SALL3     | 0 | chr18 | 74564000  |
| -1453416 | GALR1        | 0   | 276762  | SALL3     | 0 | chr18 | 74564500  |
| 96718    | C11orf80     | 0   | 2063    | C11orf80  | 0 | chr11 | 66365500  |
| -75375   | ANGPTL7      | 0   | 1841    | UBIAD1    | 0 | chr1  | 11254000  |
| -75875   | ANGPTL7      | 0   | 1341    | UBIAD1    | 0 | chr1  | 11254500  |
| 7161     | GMFG         | 0   | 566     | GMFG      | 0 | chr19 | 44518000  |
| 7661     | GMFG         | 0   | 66      | GMFG      | 0 | chr19 | 44518500  |
| 20312    | AMZ1         | 0   | 15595   | AMZ1      | 0 | chr7  | 2706000   |
| 4579     | ADRM1        | 0   | 1313    | ADRM1     | 0 | chr20 | 60316000  |
| 3232     | MAPK11       | 0   | 3406    | MAPK11    | 0 | chr22 | 49047500  |
| ---      | ---          | --- | 21990   | PLCXD1    | 0 | chrX  | 111000    |
| ---      | ---          | --- | 21490   | PLCXD1    | 0 | chrX  | 111500    |
| -15838   | FAM120B      | 0   | 114129  | PSMB1     | 0 | chr6  | 170572000 |
| -16338   | FAM120B      | 0   | 113629  | PSMB1     | 0 | chr6  | 170572500 |
| 36649    | COL18A1      | 0   | 21562   | COL18A1   | 0 | chr21 | 45736500  |
| -13086   | C9orf167     | 0   | 3903    | NRARP     | 0 | chr9  | 139310000 |
| -1821    | LOC728024    | 0   | 12758   | PROSC     | 0 | chr8  | 37726500  |
| -1856    | RCC2         | 0   | 99416   | ARHGEF10L | 0 | chr1  | 17639500  |
| -2356    | RCC2         | 0   | 98916   | ARHGEF10L | 0 | chr1  | 17640000  |
| 10582    | GFI1B        | 0   | 2404    | GFI1B     | 0 | chr9  | 134854500 |
| 11082    | GFI1B        | 0   | 1904    | GFI1B     | 0 | chr9  | 134855000 |
| 67751    | TRAK1        | 0   | 66772   | TRAK1     | 0 | chr3  | 42175500  |
| 68251    | TRAK1        | 0   | 66272   | TRAK1     | 0 | chr3  | 42176000  |
| 51       | NANOS3       | 0   | 3571    | NANOS3    | 0 | chr19 | 13849000  |
| 5144     | WNT3         | 0   | 49081   | WNT3      | 0 | chr17 | 42202000  |
| 5644     | WNT3         | 0   | 48581   | WNT3      | 0 | chr17 | 42202500  |
| -4257    | C19orf24     | 0   | 2667    | EFNA2     | 0 | chr19 | 1234500   |
| -1615    | FAM106A      | 0   | 54946   | CCDC144B  | 0 | chr17 | 18372500  |
| 32705    | ADAMTSL2     | 0   | 7961    | ADAMTSL2  | 0 | chr9  | 135422500 |
| 54547    | MAD1L1       | 0   | 362609  | MAD1L1    | 0 | chr7  | 1876500   |
| 55047    | MAD1L1       | 0   | 362109  | MAD1L1    | 0 | chr7  | 1877000   |
| 55547    | MAD1L1       | 0   | 361609  | MAD1L1    | 0 | chr7  | 1877500   |
| 8428     | PC           | 0   | 50916   | PC        | 0 | chr11 | 66381000  |
| 13998    | FASN         | 0   | 5895    | FASN      | 0 | chr17 | 77643500  |
| 14498    | FASN         | 0   | 5395    | FASN      | 0 | chr17 | 77644000  |
| -14298   | LY6E         | 0   | 2553    | C8orf31   | 0 | chr8  | 144189500 |
| 1006     | PSMG3        | 0   | 1694    | PSMG3     | 0 | chr7  | 1574500   |
| -91234   | TM4SF20      | 0   | 1631    | AGFG1     | 0 | chr2  | 228043500 |

|         |              |   |        |           |   |       |           |
|---------|--------------|---|--------|-----------|---|-------|-----------|
| -6277   | TWF2         | 0 | 764    | PPM1M     | 0 | chr3  | 52254500  |
| 10021   | FSCN1        | 0 | 3812   | FSCN1     | 0 | chr7  | 5609000   |
| 10521   | FSCN1        | 0 | 3312   | FSCN1     | 0 | chr7  | 5609500   |
| -46904  | SLC7A10      | 0 | 27181  | CEBPA     | 0 | chr19 | 38455500  |
| -47404  | SLC7A10      | 0 | 26681  | CEBPA     | 0 | chr19 | 38456000  |
| -47904  | SLC7A10      | 0 | 26181  | CEBPA     | 0 | chr19 | 38456500  |
| 3710    | ELANE        | 0 | 246    | ELANE     | 0 | chr19 | 807000    |
| 403     | GRK1         | 0 | 3973   | GRK1      | 0 | chr13 | 113370000 |
| 4759    | CACNA1H      | 0 | 63773  | CACNA1H   | 0 | chr16 | 1148000   |
| 763     | MMP23A       | 0 | 1107   | MMP23A    | 0 | chr1  | 1622000   |
| 1263    | MMP23A       | 0 | 607    | MMP23A    | 0 | chr1  | 1622500   |
| -9514   | TNNI2        | 0 | 1775   | LSP1      | 0 | chr11 | 1829000   |
| -563    | LOC401010    | 0 | 30635  | TUBA3D    | 0 | chr2  | 131919500 |
| -1063   | LOC401010    | 0 | 30135  | TUBA3D    | 0 | chr2  | 131920000 |
| 6015    | KCNK9        | 0 | 84481  | KCNK9     | 0 | chr8  | 140700000 |
| 6515    | KCNK9        | 0 | 83981  | KCNK9     | 0 | chr8  | 140700500 |
| 1839    | MRTO4        | 0 | 6709   | MRTO4     | 0 | chr1  | 19452500  |
| -190304 | TRIM43       | 0 | 220525 | LOC729234 | 0 | chr2  | 95819500  |
| -114734 | ADORA3       | 0 | 927    | RAP1A     | 0 | chr1  | 111963000 |
| 5173    | WDR18        | 0 | 5069   | WDR18     | 0 | chr19 | 940500    |
| 316036  | SHISA6       | 0 | 1421   | SHISA6    | 0 | chr17 | 11401500  |
| 316536  | SHISA6       | 0 | 921    | SHISA6    | 0 | chr17 | 11402000  |
| -9756   | CSPG4        | 0 | 1373   | ODF3L1    | 0 | chr15 | 73802000  |
| 12531   | PPP2R3B      | 0 | 40127  | PPP2R3B   | 0 | chrX  | 227500    |
| -88328  | SLC12A7      | 0 | 1209   | SLC6A19   | 0 | chr5  | 1253500   |
| 291     | SLC6A19      | 0 | 23230  | SLC6A19   | 0 | chr5  | 1255000   |
| -197993 | UBE2V2       | 0 | 455026 | EFCAB1    | 0 | chr8  | 49335000  |
| -1824   | CCNL1        | 0 | 98391  | VEPH1     | 0 | chr3  | 158363000 |
| -23349  | PAPOLB       | 0 | 20645  | MMD2      | 0 | chr7  | 4891500   |
| 37989   | EMR4P        | 0 | 357    | EMR4P     | 0 | chr19 | 6941500   |
| -1096   | ODC1         | 0 | 121344 | NOL10     | 0 | chr2  | 10507000  |
| -5445   | SNAP47       | 0 | 29040  | PRSS38    | 0 | chr1  | 226041000 |
| -921    | CAPZB        | 0 | 110553 | C1orf151  | 0 | chr1  | 19685500  |
| 22040   | KNDC1        | 0 | 43906  | KNDC1     | 0 | chr10 | 134846000 |
| 699     | CRIP1        | 0 | 1169   | CRIP1     | 0 | chr14 | 105025000 |
| 18273   | SCIN         | 0 | 64753  | SCIN      | 0 | chr7  | 12595000  |
| -8281   | PRSS21       | 0 | 173    | ZG16B     | 0 | chr16 | 2820000   |
| 327     | ZG16B        | 0 | 1786   | ZG16B     | 0 | chr16 | 2820500   |
| -1109   | COL6A1       | 0 | 91960  | COL6A2    | 0 | chr21 | 46250500  |
| -1609   | COL6A1       | 0 | 91460  | COL6A2    | 0 | chr21 | 46251000  |
| -76197  | TSPAN11      | 0 | 1045   | DDX11     | 0 | chr12 | 31117000  |
| -22054  | SPTBN2       | 0 | 1282   | C11orf80  | 0 | chr11 | 66267500  |
| 18607   | PRDM15       | 0 | 59660  | PRDM15    | 0 | chr21 | 42113000  |
| -616    | C10orf119    | 0 | 19212  | SEC23IP   | 0 | chr10 | 121623000 |
| -1116   | C10orf119    | 0 | 18712  | SEC23IP   | 0 | chr10 | 121623500 |
| -108441 | NOTCH1       | 0 | 8697   | EGFL7     | 0 | chr9  | 138668500 |
| 32776   | QRICH2       | 0 | 856    | QRICH2    | 0 | chr17 | 71814500  |
| 33276   | QRICH2       | 0 | 356    | QRICH2    | 0 | chr17 | 71815000  |
| 1793    | FBXW5        | 0 | 2494   | FBXW5     | 0 | chr9  | 138956500 |
| 26667   | SLC9A3       | 0 | 24549  | SLC9A3    | 0 | chr5  | 553000    |
| 27167   | SLC9A3       | 0 | 24049  | SLC9A3    | 0 | chr5  | 553500    |
| -4274   | LOC100133545 | 0 | 981    | H19       | 0 | chr11 | 1972000   |
| -4774   | LOC100133545 | 0 | 481    | H19       | 0 | chr11 | 1972500   |
| -140135 | ANGPTL2      | 0 | 1576   | GARNL3    | 0 | chr9  | 129065000 |
| 13060   | LILRB1       | 0 | 7316   | LILRB1    | 0 | chr19 | 59833500  |
| 29309   | PLXNA1       | 0 | 19420  | PLXNA1    | 0 | chr3  | 128219500 |
| 29809   | PLXNA1       | 0 | 18920  | PLXNA1    | 0 | chr3  | 128220000 |
| 9612    | SLC9A3R2     | 0 | 2528   | SLC9A3R2  | 0 | chr16 | 2026500   |

|         |              |   |         |              |   |       |           |
|---------|--------------|---|---------|--------------|---|-------|-----------|
| 31964   | EBF3         | 0 | 96581   | EBF3         | 0 | chr10 | 131555500 |
| 2071    | ANO9         | 0 | 22011   | ANO9         | 0 | chr11 | 410000    |
| 2571    | ANO9         | 0 | 21511   | ANO9         | 0 | chr11 | 410500    |
| 29129   | MUC5B        | 0 | 9982    | MUC5B        | 0 | chr11 | 1230000   |
| 29629   | MUC5B        | 0 | 9482    | MUC5B        | 0 | chr11 | 1230500   |
| 30129   | MUC5B        | 0 | 8982    | MUC5B        | 0 | chr11 | 1231000   |
| 27679   | ATXN1        | 0 | 434700  | ATXN1        | 0 | chr6  | 16435000  |
| -148189 | NFATC1       | 0 | 2288    | CTDP1        | 0 | chr18 | 75538500  |
| -148689 | NFATC1       | 0 | 1788    | CTDP1        | 0 | chr18 | 75539000  |
| 58532   | ZNF341       | 0 | 1736    | ZNF341       | 0 | chr20 | 31842000  |
| 59032   | ZNF341       | 0 | 1236    | ZNF341       | 0 | chr20 | 31842500  |
| -1178   | KHSRP        | 0 | 47      | SLC25A41     | 0 | chr19 | 6377000   |
| 453     | SLC25A41     | 0 | 7290    | SLC25A41     | 0 | chr19 | 6377500   |
| 9703    | RASD2        | 0 | 2991    | RASD2        | 0 | chr22 | 34277000  |
| 10203   | RASD2        | 0 | 2491    | RASD2        | 0 | chr22 | 34277500  |
| 10703   | RASD2        | 0 | 1991    | RASD2        | 0 | chr22 | 34278000  |
| 20642   | FLT4         | 0 | 21230   | FLT4         | 0 | chr5  | 179988000 |
| -141816 | NCRNA00168   | 0 | 1368751 | PFKP         | 0 | chr10 | 1731000   |
| -891    | TFR2         | 0 | 661     | ACTL6B       | 0 | chr7  | 100078000 |
| -1942   | FRG2C        | 0 | 67718   | ZNF717       | 0 | chr3  | 75801000  |
| -2442   | FRG2C        | 0 | 67218   | ZNF717       | 0 | chr3  | 75801500  |
| 25276   | HHIPL2       | 0 | 567     | HHIPL2       | 0 | chr1  | 220787500 |
| -1099   | TIGD7        | 0 | 2933    | ZNF75A       | 0 | chr16 | 3292500   |
| -41144  | GRHL1        | 0 | 132     | KLF11        | 0 | chr2  | 10101000  |
| -486    | CTDSP2       | 0 | 94211   | XRCC6BP1     | 0 | chr12 | 56527500  |
| -986    | CTDSP2       | 0 | 93711   | XRCC6BP1     | 0 | chr12 | 56528000  |
| 41905   | TP73         | 0 | 1327    | TP73         | 0 | chr1  | 3639000   |
| 24490   | GLT25D1      | 0 | 2965    | GLT25D1      | 0 | chr19 | 17552000  |
| 24990   | GLT25D1      | 0 | 2465    | GLT25D1      | 0 | chr19 | 17552500  |
| -10467  | DKFZP434L187 | 0 | 136234  | CHRFAM7A     | 0 | chr15 | 28304500  |
| 67      | LOC100271831 | 0 | 327     | LOC100271831 | 0 | chr16 | 30033000  |
| 7839    | B9D2         | 0 | 1918    | B9D2         | 0 | chr19 | 46560000  |
| 8339    | B9D2         | 0 | 1418    | B9D2         | 0 | chr19 | 46560500  |
| 8839    | B9D2         | 0 | 918     | B9D2         | 0 | chr19 | 46561000  |
| 2758    | DKK4         | 0 | 331     | DKK4         | 0 | chr8  | 42353500  |
| 2741    | NFATC1       | 0 | 69665   | NFATC1       | 0 | chr18 | 75259500  |
| 3241    | NFATC1       | 0 | 69165   | NFATC1       | 0 | chr18 | 75260000  |
| 13634   | HTR6         | 0 | 642     | HTR6         | 0 | chr1  | 19878000  |
| -81170  | LOC441956    | 0 | 80825   | C21orf15     | 0 | chr21 | 14056500  |
| -2795   | GTPBP5       | 0 | 9411    | HRH3         | 0 | chr20 | 60214000  |
| -53143  | KCNG4        | 0 | 1901    | WFDC1        | 0 | chr16 | 82884000  |
| 34866   | DCUN1D2      | 0 | 24      | DCUN1D2      | 0 | chr13 | 113193000 |
| -104254 | ZNF770       | 0 | 144818  | LOC723972    | 0 | chr15 | 33172000  |
| -104754 | ZNF770       | 0 | 144318  | LOC723972    | 0 | chr15 | 33172500  |
| -38523  | AFF3         | 0 | 129184  | LONRF2       | 0 | chr2  | 100127000 |
| -1706   | CASZ1        | 0 | 148119  | C1orf127     | 0 | chr1  | 10781000  |
| -2206   | CASZ1        | 0 | 147619  | C1orf127     | 0 | chr1  | 10781500  |
| 10811   | GNAS         | 0 | 60645   | GNAS         | 0 | chr20 | 56859000  |
| -206624 | ZNF184       | 0 | 127735  | HIST1H2BL    | 0 | chr6  | 27755500  |
| -207124 | ZNF184       | 0 | 127235  | HIST1H2BL    | 0 | chr6  | 27756000  |
| -285243 | THSD7B       | 0 | 1277    | HNMT         | 0 | chr2  | 138437000 |
| -285743 | THSD7B       | 0 | 777     | HNMT         | 0 | chr2  | 138437500 |
| -714    | A3GALT2      | 0 | 1810    | PHC2         | 0 | chr1  | 33560000  |
| -89864  | C21orf81     | 0 | 38505   | LIPI         | 0 | chr21 | 14364500  |
| -90364  | C21orf81     | 0 | 38005   | LIPI         | 0 | chr21 | 14365000  |
| 38647   | STEAP3       | 0 | 3197    | STEAP3       | 0 | chr2  | 119736500 |
| -1380   | LOC728613    | 0 | 162998  | MRPL36       | 0 | chr5  | 1688500   |
| 7154    | LOC154449    | 0 | 1082    | LOC154449    | 0 | chr6  | 170412500 |

|         |           |   |        |          |   |       |           |
|---------|-----------|---|--------|----------|---|-------|-----------|
| 663     | C1orf65   | 0 | 1435   | C1orf65  | 0 | chr1  | 221634000 |
| 1163    | C1orf65   | 0 | 935    | C1orf65  | 0 | chr1  | 221634500 |
| 1223    | C2orf56   | 0 | 16307  | C2orf56  | 0 | chr2  | 37313500  |
| 42      | DGKE      | 0 | 34533  | DGKE     | 0 | chr17 | 52266500  |
| 10692   | PLEC      | 0 | 49531  | PLEC     | 0 | chr8  | 145072000 |
| 11192   | PLEC      | 0 | 49031  | PLEC     | 0 | chr8  | 145072500 |
| 11692   | PLEC      | 0 | 48531  | PLEC     | 0 | chr8  | 145073000 |
| -962    | NEUROG1   | 0 | 33767  | CXCL14   | 0 | chr5  | 134900500 |
| -1462   | NEUROG1   | 0 | 33267  | CXCL14   | 0 | chr5  | 134901000 |
| 63      | FLRT1     | 0 | 15221  | FLRT1    | 0 | chr11 | 63628000  |
| 563     | FLRT1     | 0 | 14721  | FLRT1    | 0 | chr11 | 63628500  |
| -455    | CCDC144NL | 0 | 102997 | USP22    | 0 | chr17 | 20740500  |
| 10048   | PALM      | 0 | 29330  | PALM     | 0 | chr19 | 670000    |
| 10548   | PALM      | 0 | 28830  | PALM     | 0 | chr19 | 670500    |
| 11048   | PALM      | 0 | 28330  | PALM     | 0 | chr19 | 671000    |
| 3630    | ARHGAP39  | 0 | 80696  | ARHGAP39 | 0 | chr8  | 145729000 |
| 26079   | FGD3      | 0 | 62839  | FGD3     | 0 | chr9  | 94775500  |
| 7083    | TUBA3C    | 0 | 936    | TUBA3C   | 0 | chr13 | 18653000  |
| -17134  | WISP2     | 0 | 901    | KCNK15   | 0 | chr20 | 42807000  |
| -8034   | SNORA38   | 0 | 7783   | BAT3     | 0 | chr6  | 31707000  |
| -8534   | SNORA38   | 0 | 7283   | BAT3     | 0 | chr6  | 31707500  |
| -165464 | SKA1      | 0 | 481    | MAPK4    | 0 | chr18 | 46340000  |
| 19      | MAPK4     | 0 | 171694 | MAPK4    | 0 | chr18 | 46340500  |
| 115003  | PHACTR3   | 0 | 128161 | PHACTR3  | 0 | chr20 | 57728000  |
| 116503  | PHACTR3   | 0 | 126661 | PHACTR3  | 0 | chr20 | 57729500  |
| -102121 | INSIG1    | 0 | 108584 | EN2      | 0 | chr7  | 154835000 |
| -102621 | INSIG1    | 0 | 108084 | EN2      | 0 | chr7  | 154835500 |
| 35      | HS3ST6    | 0 | 6732   | HS3ST6   | 0 | chr16 | 1901500   |
| -1570   | ETNK2     | 0 | 1066   | REN      | 0 | chr1  | 202389500 |
| -2070   | ETNK2     | 0 | 566    | REN      | 0 | chr1  | 202390000 |
| 285     | MEG3      | 0 | 34621  | MEG3     | 0 | chr14 | 100362500 |
| 785     | MEG3      | 0 | 34121  | MEG3     | 0 | chr14 | 100363000 |
| 1285    | MEG3      | 0 | 33621  | MEG3     | 0 | chr14 | 100363500 |
| 1785    | MEG3      | 0 | 33121  | MEG3     | 0 | chr14 | 100364000 |
| 61759   | CACNA1H   | 0 | 6773   | CACNA1H  | 0 | chr16 | 1205000   |
| 62259   | CACNA1H   | 0 | 6273   | CACNA1H  | 0 | chr16 | 1205500   |
| 8708    | GRK6      | 0 | 7456   | GRK6     | 0 | chr5  | 176795000 |
| 860     | ASFMR1    | 0 | 11868  | ASFMR1   | 0 | chrX  | 146799500 |
| 1360    | ASFMR1    | 0 | 11368  | ASFMR1   | 0 | chrX  | 146800000 |
| -50735  | PTPN14    | 0 | 1154   | CENPF    | 0 | chr1  | 212842000 |
| -270058 | POTEG     | 0 | 128953 | POTEM    | 0 | chr14 | 18925000  |
| -33727  | OLFM1     | 0 | 347968 | KIAA0649 | 0 | chr9  | 137163500 |
| -15523  | GPER      | 0 | 43569  | ZFAND2A  | 0 | chr7  | 1115500   |
| 31695   | CRYL1     | 0 | 90512  | CRYL1    | 0 | chr13 | 19907500  |
| 32195   | CRYL1     | 0 | 90012  | CRYL1    | 0 | chr13 | 19908000  |
| 3299    | ISL2      | 0 | 2371   | ISL2     | 0 | chr15 | 74419500  |
| 3799    | ISL2      | 0 | 1871   | ISL2     | 0 | chr15 | 74420000  |
| -911    | PRSS42    | 0 | 22860  | MYL3     | 0 | chr3  | 46851500  |
| -125754 | DENND1B   | 0 | 1399   | C1orf53  | 0 | chr1  | 196137000 |
| -126254 | DENND1B   | 0 | 899    | C1orf53  | 0 | chr1  | 196137500 |
| 46062   | C6orf176  | 0 | 2517   | C6orf176 | 0 | chr6  | 166319000 |
| 6819    | PIP5K1C   | 0 | 63445  | PIP5K1C  | 0 | chr19 | 3588000   |
| 7319    | PIP5K1C   | 0 | 62945  | PIP5K1C  | 0 | chr19 | 3588500   |
| -406    | KRTAP2-1  | 0 | 17393  | KRTAP2-4 | 0 | chr17 | 36457500  |
| 20872   | SPPL2B    | 0 | 5600   | SPPL2B   | 0 | chr19 | 2300500   |
| 21372   | SPPL2B    | 0 | 5100   | SPPL2B   | 0 | chr19 | 2301000   |
| 15107   | PRDM15    | 0 | 63160  | PRDM15   | 0 | chr21 | 42109500  |
| -1942   | PNMAGA    | 0 | 138715 | MAGEA1   | 0 | chrX  | 151996000 |



|         |          |   |         |           |   |       |           |
|---------|----------|---|---------|-----------|---|-------|-----------|
| 308525  | MSRA     | 0 | 24809   | MSRA      | 0 | chr8  | 10299000  |
| 309025  | MSRA     | 0 | 24309   | MSRA      | 0 | chr8  | 10299500  |
| -24514  | NLRP5    | 0 | 1043    | ZNF787    | 0 | chr19 | 61289500  |
| 643     | DOK3     | 0 | 5464    | DOK3      | 0 | chr5  | 176864000 |
| 25102   | FYCO1    | 0 | 52811   | FYCO1     | 0 | chr3  | 45959500  |
| 4367    | CALHM1   | 0 | 1138    | CALHM1    | 0 | chr10 | 105207500 |
| 4867    | CALHM1   | 0 | 638     | CALHM1    | 0 | chr10 | 105208000 |
| 17792   | OBSL1    | 0 | 2755    | OBSL1     | 0 | chr2  | 220141500 |
| -2015   | ATP2A3   | 0 | 37987   | ZZEF1     | 0 | chr17 | 3816500   |
| 30663   | KLHL26   | 0 | 2802    | KLHL26    | 0 | chr19 | 18639500  |
| 31163   | KLHL26   | 0 | 2302    | KLHL26    | 0 | chr19 | 18640000  |
| -30146  | TFAMP1   | 0 | 97632   | ELFN1     | 0 | chr7  | 1653000   |
| -30646  | TFAMP1   | 0 | 97132   | ELFN1     | 0 | chr7  | 1653500   |
| -2055   | GPR56    | 0 | 1157    | GPR97     | 0 | chr16 | 56258500  |
| -1226   | C2CD4B   | 0 | 470664  | MGC15885  | 0 | chr15 | 60246000  |
| 72990   | PTPRN2   | 0 | 975743  | PTPRN2    | 0 | chr7  | 157097500 |
| 73490   | PTPRN2   | 0 | 975243  | PTPRN2    | 0 | chr7  | 157098000 |
| -3770   | SNORD15A | 0 | 112     | SNORD15B  | 0 | chr11 | 74793000  |
| 1714    | RAB35    | 0 | 19982   | RAB35     | 0 | chr12 | 119019000 |
| 2171    | KLHL17   | 0 | 2958    | KLHL17    | 0 | chr1  | 888000    |
| 2671    | KLHL17   | 0 | 2458    | KLHL17    | 0 | chr1  | 888500    |
| 3171    | KLHL17   | 0 | 1958    | KLHL17    | 0 | chr1  | 889000    |
| -1506   | TRAF1    | 0 | 23934   | C5        | 0 | chr9  | 122730500 |
| -1572   | TNNT2    | 0 | 1588    | LAD1      | 0 | chr1  | 199615000 |
| -8555   | EPN1     | 0 | 4109    | NLRP9     | 0 | chr19 | 60907500  |
| -1672   | ACOT9    | 0 | 38224   | SAT1      | 0 | chrX  | 23673000  |
| -2172   | ACOT9    | 0 | 37724   | SAT1      | 0 | chrX  | 23673500  |
| 257616  | ATP9B    | 0 | 51270   | ATP9B     | 0 | chr18 | 75188000  |
| 258116  | ATP9B    | 0 | 50770   | ATP9B     | 0 | chr18 | 75188500  |
| 258616  | ATP9B    | 0 | 50270   | ATP9B     | 0 | chr18 | 75189000  |
| 6233    | CBFA2T3  | 0 | 60109   | CBFA2T3   | 0 | chr16 | 87475000  |
| -18144  | WDR91    | 0 | 2270    | STRA8     | 0 | chr7  | 134565000 |
| 1087    | NCOR2    | 0 | 210102  | NCOR2     | 0 | chr12 | 123376000 |
| 36381   | PON3     | 0 | 123     | PON3      | 0 | chr7  | 94863500  |
| -236796 | C2orf27B | 0 | 109138  | ANKRD30BL | 0 | chr2  | 132512500 |
| 1543    | CLDN9    | 0 | 507     | CLDN9     | 0 | chr16 | 3004000   |
| 5383    | MFSD7    | 0 | 1973    | MFSD7     | 0 | chr4  | 671000    |
| 5883    | MFSD7    | 0 | 1473    | MFSD7     | 0 | chr4  | 671500    |
| -1929   | C8orf73  | 0 | 97      | NAPRT1    | 0 | chr8  | 144728000 |
| 403     | NAPRT1   | 0 | 3156    | NAPRT1    | 0 | chr8  | 144728500 |
| -995    | AVPI1    | 0 | 25470   | MARVELD1  | 0 | chr10 | 99438000  |
| -1495   | AVPI1    | 0 | 24970   | MARVELD1  | 0 | chr10 | 99438500  |
| -1666   | WSB2     | 0 | 782     | VSIG10    | 0 | chr12 | 116985000 |
| -359    | HS6ST1   | 0 | 1603904 | LOC389033 | 0 | chr2  | 128793000 |
| -11470  | DBNDD1   | 0 | 1008    | GAS8      | 0 | chr16 | 88615500  |
| -11970  | DBNDD1   | 0 | 508     | GAS8      | 0 | chr16 | 88616000  |
| -4103   | PCDHB10  | 0 | 31      | PCDHB11   | 0 | chr5  | 140559500 |
| -1152   | TCEA3    | 0 | 2642    | ASAP3     | 0 | chr1  | 23625000  |
| 13172   | C14orf86 | 0 | 8471    | C14orf86  | 0 | chr14 | 93454000  |
| 219     | MEST     | 0 | 19867   | MEST      | 0 | chr7  | 129913500 |
| 11603   | ZFYVE21  | 0 | 6252    | ZFYVE21   | 0 | chr14 | 103263500 |
| 23966   | MOBKL2A  | 0 | 1269    | MOBKL2A   | 0 | chr19 | 2046000   |
| 4809    | SF3B3    | 0 | 49071   | SF3B3     | 0 | chr16 | 69120000  |
| -7902   | ZNF548   | 0 | 1840    | ZNF17     | 0 | chr19 | 62612500  |
| -78251  | PRKAG2   | 0 | 943     | GALNTL5   | 0 | chr7  | 151283500 |
| -404    | SERPINC1 | 0 | 13474   | RC3H1     | 0 | chr1  | 172153500 |
| -700    | KIAA0100 | 0 | 2733    | SDF2      | 0 | chr17 | 23997000  |
| 45174   | GAB4     | 0 | 1112    | GAB4      | 0 | chr22 | 15868000  |

|         |          |   |        |             |   |       |           |
|---------|----------|---|--------|-------------|---|-------|-----------|
| 45674   | GAB4     | 0 | 612    | GAB4        | 0 | chr22 | 15868500  |
| -1348   | FAM200A  | 0 | 4980   | ZNF655      | 0 | chr7  | 98989000  |
| -1848   | FAM200A  | 0 | 4480   | ZNF655      | 0 | chr7  | 98989500  |
| 328     | OSGIN1   | 0 | 16938  | OSGIN1      | 0 | chr16 | 82540500  |
| 406     | GPR119   | 0 | 602    | GPR119      | 0 | chrX  | 129346500 |
| -564    | DDX49    | 0 | 9      | HOMER3      | 0 | chr19 | 18901000  |
| 213     | ---      | 0 | 962    | ---         | 0 | chrY  | 2718000   |
| 2310    | AATK     | 0 | 46467  | AATK        | 0 | chr17 | 76708000  |
| 790     | C16orf55 | 0 | 12676  | C16orf55    | 0 | chr16 | 88252500  |
| -425    | JTB      | 0 | 3251   | RAB13       | 0 | chr1  | 152217500 |
| -925    | JTB      | 0 | 2751   | RAB13       | 0 | chr1  | 152218000 |
| 19789   | PKD1     | 0 | 27400  | PKD1        | 0 | chr16 | 2098500   |
| 18520   | ADRBK1   | 0 | 1605   | ADRBK1      | 0 | chr11 | 66809000  |
| -96452  | PRO0628  | 0 | 2074   | PLCG1       | 0 | chr20 | 39197500  |
| -96952  | PRO0628  | 0 | 1574   | PLCG1       | 0 | chr20 | 39198000  |
| 91076   | CRTC1    | 0 | 7643   | CRTC1       | 0 | chr19 | 18746500  |
| 91576   | CRTC1    | 0 | 7143   | CRTC1       | 0 | chr19 | 18747000  |
| -1745   | MAGEA2B  | 0 | 5889   | CSAG3,CSAG2 | 0 | chrX  | 151672500 |
| 1614    | C17orf70 | 0 | 10848  | C17orf70    | 0 | chr17 | 77119000  |
| 4746    | C21orf2  | 0 | 5713   | C21orf2     | 0 | chr21 | 44578000  |
| 5246    | C21orf2  | 0 | 5213   | C21orf2     | 0 | chr21 | 44578500  |
| -108040 | IQSEC1   | 0 | 240736 | NUP210      | 0 | chr3  | 13092000  |
| 98114   | C10orf92 | 0 | 20989  | C10orf92    | 0 | chr10 | 134570000 |
| -1848   | HAPLN1   | 0 | 219381 | EDIL3       | 0 | chr5  | 83054500  |
| -584    | GNG4     | 0 | 10468  | LYST        | 0 | chr1  | 233880500 |
| -1084   | GNG4     | 0 | 9968   | LYST        | 0 | chr1  | 233881000 |
| -1584   | GNG4     | 0 | 9468   | LYST        | 0 | chr1  | 233881500 |
| -55970  | CRLF2    | 0 | 200    | CSF2RA      | 0 | chrY  | 1347500   |
| 300     | CSF2RA   | 0 | 40827  | CSF2RA      | 0 | chrY  | 1348000   |
| -1742   | GSTTP1   | 0 | 24116  | LOC391322   | 0 | chr22 | 22679000  |
| 4555    | SLC43A2  | 0 | 49880  | SLC43A2     | 0 | chr17 | 1429000   |
| 5055    | SLC43A2  | 0 | 49380  | SLC43A2     | 0 | chr17 | 1429500   |
| -43227  | SBNO2    | 0 | 30297  | STK11       | 0 | chr19 | 1126500   |
| 141     | MEG8     | 0 | 12058  | MEG8        | 0 | chr14 | 100431000 |
| 641     | MEG8     | 0 | 11558  | MEG8        | 0 | chr14 | 100431500 |
| -41521  | SOX8     | 0 | 35584  | LOC146336   | 0 | chr16 | 1018500   |
| -26766  | CDC42EP5 | 0 | 2824   | LAIR2       | 0 | chr19 | 59703000  |
| 11436   | EFNB1    | 0 | 1731   | EFNB1       | 0 | chrX  | 67977000  |
| 1804    | TKTL2    | 0 | 997    | TKTL2       | 0 | chr4  | 164613500 |
| 2304    | TKTL2    | 0 | 497    | TKTL2       | 0 | chr4  | 164614000 |
| -3      | TKTL2    | 0 | 20622  | C4orf43     | 0 | chr4  | 164614500 |
| 22555   | SLC2A7   | 0 | 491    | SLC2A7      | 0 | chr1  | 9008500   |
| -32798  | FAM35A   | 0 | 1184   | FAM22A      | 0 | chr10 | 88974000  |
| -33298  | FAM35A   | 0 | 684    | FAM22A      | 0 | chr10 | 88974500  |
| -33798  | FAM35A   | 0 | 184    | FAM22A      | 0 | chr10 | 88975000  |
| -24106  | DNAJB6   | 0 | 97510  | PTPRN2      | 0 | chr7  | 156927000 |
| -24606  | DNAJB6   | 0 | 97010  | PTPRN2      | 0 | chr7  | 156927500 |
| -25106  | DNAJB6   | 0 | 96510  | PTPRN2      | 0 | chr7  | 156928000 |
| -16684  | KIR2DL3  | 0 | 76     | KIR2DL1     | 0 | chr19 | 59973000  |
| 19143   | PFKL     | 0 | 8184   | PFKL        | 0 | chr21 | 44563500  |
| 6626    | TNNT3    | 0 | 12512  | TNNT3       | 0 | chr11 | 1904000   |
| 33374   | VIPR2    | 0 | 83410  | VIPR2       | 0 | chr7  | 158547000 |
| 33874   | VIPR2    | 0 | 82910  | VIPR2       | 0 | chr7  | 158547500 |
| 5169    | ZNF526   | 0 | 2693   | ZNF526      | 0 | chr19 | 47421500  |
| 121491  | ABR      | 0 | 62366  | ABR         | 0 | chr17 | 975000    |
| 121991  | ABR      | 0 | 61866  | ABR         | 0 | chr17 | 975500    |
| -1239   | COX19    | 0 | 6360   | CYP2W1      | 0 | chr7  | 983000    |
| -14588  | C17orf42 | 0 | 879    | ADAP2       | 0 | chr17 | 26272000  |

|         |          |   |        |           |   |       |           |
|---------|----------|---|--------|-----------|---|-------|-----------|
| -1518   | BEND7    | 0 | 82444  | PRPF18    | 0 | chr10 | 13586500  |
| -2018   | BEND7    | 0 | 81944  | PRPF18    | 0 | chr10 | 13587000  |
| 9413    | LRPAP1   | 0 | 10522  | LRPAP1    | 0 | chr4  | 3493500   |
| -22190  | TET3     | 0 | 5035   | BOLA3     | 0 | chr2  | 74211000  |
| 1705    | DDAH2    | 0 | 1518   | DDAH2     | 0 | chr6  | 31804500  |
| -12053  | KCNH2    | 0 | 1079   | NOS3      | 0 | chr7  | 150318000 |
| -990    | PNCK     | 0 | 12945  | SLC6A8    | 0 | chrX  | 152594000 |
| 22645   | ARHGAP30 | 0 | 384    | ARHGAP30  | 0 | chr1  | 159306000 |
| -14052  | LASS3    | 0 | 10457  | LINS1     | 0 | chr15 | 98916500  |
| 5881    | EPS8L2   | 0 | 15726  | EPS8L2    | 0 | chr11 | 702000    |
| 6381    | EPS8L2   | 0 | 15226  | EPS8L2    | 0 | chr11 | 702500    |
| -348606 | C6orf208 | 0 | 111846 | LOC154449 | 0 | chr6  | 170293500 |
| 121314  | RREB1    | 0 | 22191  | RREB1     | 0 | chr6  | 7174500   |
| 5731    | RP1L1    | 0 | 43027  | RP1L1     | 0 | chr8  | 10507000  |
| -120501 | SOSTDC1  | 0 | 13436  | ANKMY2    | 0 | chr7  | 16592500  |
| -121001 | SOSTDC1  | 0 | 12936  | ANKMY2    | 0 | chr7  | 16593000  |
| -1967   | FABP5L3  | 0 | 256    | CCT8L1    | 0 | chr7  | 151773000 |
| -348    | GPRC5B   | 0 | 146543 | GPR139    | 0 | chr16 | 19804000  |
| -1033   | EDNRB    | 0 | 679230 | POU4F1    | 0 | chr13 | 77392000  |
| -497    | PITRM1   | 0 | 605738 | KLF6      | 0 | chr10 | 3205500   |
| -859    | PQLC1    | 0 | 12069  | HSBP1L1   | 0 | chr18 | 75813500  |
| -1112   | CFDP1    | 0 | 12423  | TMEM170A  | 0 | chr16 | 74026000  |
| -26923  | MANBAL   | 0 | 501    | SRC       | 0 | chr20 | 35406000  |
| 22480   | SETD1B   | 0 | 5444   | SETD1B    | 0 | chr12 | 120749500 |
| 22980   | SETD1B   | 0 | 4944   | SETD1B    | 0 | chr12 | 120750000 |
| 10640   | C12orf72 | 0 | 11281  | C12orf72  | 0 | chr12 | 31702000  |
| 65527   | MUC5AC   | 0 | 47302  | MUC5AC    | 0 | chr11 | 1198000   |
| 372     | C16orf81 | 0 | 4084   | C16orf81  | 0 | chr16 | 87753500  |
| 107     | CABP4    | 0 | 3763   | CABP4     | 0 | chr11 | 66979500  |
| -6008   | NAGLU    | 0 | 1509   | HSD17B1   | 0 | chr17 | 37956000  |
| -6508   | NAGLU    | 0 | 1009   | HSD17B1   | 0 | chr17 | 37956500  |
| -1674   | CAMSAP1  | 0 | 24135  | UBAC1     | 0 | chr9  | 137940500 |
| 21485   | LAMA5    | 0 | 36763  | LAMA5     | 0 | chr20 | 60339000  |
| 21985   | LAMA5    | 0 | 36263  | LAMA5     | 0 | chr20 | 60339500  |
| 14212   | CTDP1    | 0 | 60495  | CTDP1     | 0 | chr18 | 75555000  |
| 14712   | CTDP1    | 0 | 59995  | CTDP1     | 0 | chr18 | 75555500  |
| 14196   | C1orf113 | 0 | 3573   | C1orf113  | 0 | chr1  | 36559500  |
| 14696   | C1orf113 | 0 | 3073   | C1orf113  | 0 | chr1  | 36560000  |
| 282     | FAM176B  | 0 | 1842   | FAM176B   | 0 | chr1  | 36560500  |
| 5480    | C1orf70  | 0 | 103    | C1orf70   | 0 | chr1  | 1465500   |
| -397    | C1orf70  | 0 | 915    | SSU72     | 0 | chr1  | 1466000   |
| 22784   | NOTCH1   | 0 | 28559  | NOTCH1    | 0 | chr9  | 138531500 |
| 23284   | NOTCH1   | 0 | 28059  | NOTCH1    | 0 | chr9  | 138532000 |
| -1629   | MTMR12   | 0 | 39712  | ZFR       | 0 | chr5  | 32350500  |
| -2129   | MTMR12   | 0 | 39212  | ZFR       | 0 | chr5  | 32351000  |
| 12460   | SLC34A1  | 0 | 1955   | SLC34A1   | 0 | chr5  | 176756500 |
| 19956   | PAX8     | 0 | 42968  | PAX8      | 0 | chr2  | 113710000 |
| 8957    | FAM70B   | 0 | 43873  | FAM70B    | 0 | chr13 | 113608000 |
| 10017   | SAMD11   | 0 | 8824   | SAMD11    | 0 | chr1  | 861000    |
| 10517   | SAMD11   | 0 | 8324   | SAMD11    | 0 | chr1  | 861500    |
| 133     | OR4F4    | 0 | 785    | OR4F4     | 0 | chr15 | 100280000 |
| -89442  | FAM178B  | 0 | 96049  | FAHD2B    | 0 | chr2  | 97017000  |
| 9126    | TNNT3    | 0 | 10012  | TNNT3     | 0 | chr11 | 1906500   |
| 29179   | ATXN1    | 0 | 433200 | ATXN1     | 0 | chr6  | 16436500  |
| -1457   | KCNK7    | 0 | 301    | MAP3K11   | 0 | chr11 | 65121500  |
| 199     | MAP3K11  | 0 | 16296  | MAP3K11   | 0 | chr11 | 65122000  |
| 1591    | PRRT2    | 0 | 2203   | PRRT2     | 0 | chr16 | 29732500  |
| 2091    | PRRT2    | 0 | 1703   | PRRT2     | 0 | chr16 | 29733000  |

|          |              |   |         |           |   |       |           |
|----------|--------------|---|---------|-----------|---|-------|-----------|
| 106025   | PCSK6        | 0 | 210     | PCSK6     | 0 | chr15 | 99847500  |
| -4177    | TBC1D26      | 0 | 37888   | MEIS3P1   | 0 | chr17 | 15593000  |
| 1243     | TNFRSF25     | 0 | 842     | TNFRSF25  | 0 | chr1  | 6448000   |
| 1743     | TNFRSF25     | 0 | 342     | TNFRSF25  | 0 | chr1  | 6448500   |
| -1540    | LOC100129534 | 0 | 37573   | RER1      | 0 | chr1  | 2275500   |
| 18237    | SLC25A48     | 0 | 35723   | SLC25A48  | 0 | chr5  | 135216500 |
| -17308   | SLC39A14     | 0 | 1040    | PPP3CC    | 0 | chr8  | 22353500  |
| -26375   | C2orf54      | 0 | 80427   | SNED1     | 0 | chr2  | 241506500 |
| -26875   | C2orf54      | 0 | 79927   | SNED1     | 0 | chr2  | 241507000 |
| -6257    | C19orf24     | 0 | 667     | EFNA2     | 0 | chr19 | 1236500   |
| -109358  | CHRNB4       | 0 | 8599    | ADAMTS7   | 0 | chr15 | 76830000  |
| -109858  | CHRNB4       | 0 | 8099    | ADAMTS7   | 0 | chr15 | 76830500  |
| 56       | KCNAB1       | 0 | 396121  | KCNAB1    | 0 | chr3  | 157343500 |
| 556      | KCNAB1       | 0 | 395621  | KCNAB1    | 0 | chr3  | 157344000 |
| 1970     | GREB1        | 0 | 46306   | GREB1     | 0 | chr2  | 11599500  |
| 920      | NLRP3        | 0 | 32027   | NLRP3     | 0 | chr1  | 245647000 |
| -1809    | TAF12        | 0 | 3698    | RNU11     | 0 | chr1  | 28844000  |
| -53421   | BMF          | 0 | 1501    | BUB1B     | 0 | chr15 | 38239000  |
| -1492    | KCNK10       | 0 | 113264  | SPATA7    | 0 | chr14 | 87808500  |
| -1741    | ASPDH        | 0 | 461     | LRRC4B    | 0 | chr19 | 55711500  |
| 39       | LRRC4B       | 0 | 51114   | LRRC4B    | 0 | chr19 | 55712000  |
| 63015    | DAGLA        | 0 | 3549    | DAGLA     | 0 | chr11 | 61267500  |
| 63515    | DAGLA        | 0 | 3049    | DAGLA     | 0 | chr11 | 61268000  |
| -642809  | FERMT1       | 0 | 1744    | BMP2      | 0 | chr20 | 6695000   |
| -83332   | ZNF496       | 0 | 1080    | NLRP3     | 0 | chr1  | 245645000 |
| -42642   | C14orf169    | 0 | 1180    | ACOT1     | 0 | chr14 | 73072500  |
| 24248    | GPSM1        | 0 | 7878    | GPSM1     | 0 | chr9  | 138366000 |
| 24748    | GPSM1        | 0 | 7378    | GPSM1     | 0 | chr9  | 138366500 |
| 33854    | TRERF1       | 0 | 193261  | TRERF1    | 0 | chr6  | 42334500  |
| 9185     | DMPK         | 0 | 3655    | DMPK      | 0 | chr19 | 50974000  |
| -143816  | NCRNA00168   | 0 | 1366751 | PFKP      | 0 | chr10 | 1733000   |
| -144316  | NCRNA00168   | 0 | 1366251 | PFKP      | 0 | chr10 | 1733500   |
| 70106    | ACTL8        | 0 | 1643    | ACTL8     | 0 | chr1  | 18024500  |
| 70606    | ACTL8        | 0 | 1143    | ACTL8     | 0 | chr1  | 18025000  |
| 71106    | ACTL8        | 0 | 643     | ACTL8     | 0 | chr1  | 18025500  |
| -35123   | TRIM49L      | 0 | 319     | TRIM64    | 0 | chr11 | 89341000  |
| -73      | CHST6        | 0 | 33428   | CHST5     | 0 | chr16 | 74086500  |
| -573     | CHST6        | 0 | 32928   | CHST5     | 0 | chr16 | 74087000  |
| 3289     | CUX2         | 0 | 313239  | CUX2      | 0 | chr12 | 109959500 |
| -2598550 | APOB         | 0 | 106037  | ATAD2B    | 0 | chr2  | 23719000  |
| 11363    | CTSZ         | 0 | 704     | CTSZ      | 0 | chr20 | 57015000  |
| 4044     | SERINC4      | 0 | 1047    | SERINC4   | 0 | chr15 | 41878500  |
| 4544     | SERINC4      | 0 | 547     | SERINC4   | 0 | chr15 | 41879000  |
| 21853    | TBC1D24      | 0 | 6489    | TBC1D24   | 0 | chr16 | 2487000   |
| 15866    | LMF1         | 0 | 101485  | LMF1      | 0 | chr16 | 859500    |
| 16366    | LMF1         | 0 | 100985  | LMF1      | 0 | chr16 | 860000    |
| -800     | BLMH         | 0 | 23491   | TMIGD1    | 0 | chr17 | 25644000  |
| 24118    | ZNF618       | 0 | 156196  | ZNF618    | 0 | chr9  | 115702500 |
| 24618    | ZNF618       | 0 | 155696  | ZNF618    | 0 | chr9  | 115703000 |
| 1615     | ARHGDI A     | 0 | 2027    | ARHGDI A  | 0 | chr17 | 77420500  |
| 31341    | LOC145783    | 0 | 989     | LOC145783 | 0 | chr15 | 54997000  |
| -397     | SEMA3C       | 0 | 782379  | HGF       | 0 | chr7  | 80387000  |
| -12973   | NKX6-2       | 0 | 9386    | C10orf92  | 0 | chr10 | 134462500 |
| -333624  | ZNF184       | 0 | 735     | HIST1H2BL | 0 | chr6  | 27882500  |
| 11368    | TNK2         | 0 | 34277   | TNK2      | 0 | chr3  | 197086000 |
| 10965    | ANKRD11      | 0 | 211970  | ANKRD11   | 0 | chr16 | 87872500  |
| 11465    | ANKRD11      | 0 | 211470  | ANKRD11   | 0 | chr16 | 87873000  |
| 11965    | ANKRD11      | 0 | 210970  | ANKRD11   | 0 | chr16 | 87873500  |

|         |          |   |         |          |   |       |           |
|---------|----------|---|---------|----------|---|-------|-----------|
| -11569  | PFN2     | 0 | 426477  | TSC22D2  | 0 | chr3  | 151183000 |
| 14284   | GET4     | 0 | 5597    | GET4     | 0 | chr7  | 897000    |
| -936    | KIAA1644 | 0 | 226113  | LDOC1L   | 0 | chr22 | 43041000  |
| 11236   | SOX10    | 0 | 985     | SOX10    | 0 | chr22 | 36709500  |
| 11736   | SOX10    | 0 | 485     | SOX10    | 0 | chr22 | 36710000  |
| 5353    | APC2     | 0 | 17743   | APC2     | 0 | chr19 | 1406500   |
| 5853    | APC2     | 0 | 17243   | APC2     | 0 | chr19 | 1407000   |
| 6353    | APC2     | 0 | 16743   | APC2     | 0 | chr19 | 1407500   |
| -1928   | RAB20    | 0 | 52008   | CARKD    | 0 | chr13 | 110014000 |
| -1655   | C1orf127 | 0 | 46765   | TARDBP   | 0 | chr1  | 10948500  |
| -2155   | C1orf127 | 0 | 46265   | TARDBP   | 0 | chr1  | 10949000  |
| -6261   | AHNAK2   | 0 | 1660    | C14orf79 | 0 | chr14 | 104522000 |
| -6761   | AHNAK2   | 0 | 1160    | C14orf79 | 0 | chr14 | 104522500 |
| 1192    | PLEC     | 0 | 59031   | PLEC     | 0 | chr8  | 145062500 |
| -3113   | PTDSS2   | 0 | 11      | RNH1     | 0 | chr11 | 484500    |
| 489     | RNH1     | 0 | 11821   | RNH1     | 0 | chr11 | 485000    |
| -50619  | ZFAND2A  | 0 | 22179   | UNCX     | 0 | chr7  | 1217000   |
| -51119  | ZFAND2A  | 0 | 21679   | UNCX     | 0 | chr7  | 1217500   |
| -339250 | FAM19A5  | 0 | 526293  | C22orf34 | 0 | chr22 | 47873000  |
| -339750 | FAM19A5  | 0 | 525793  | C22orf34 | 0 | chr22 | 47873500  |
| 2367    | CALHM1   | 0 | 3138    | CALHM1   | 0 | chr10 | 105205500 |
| 24143   | PFKL     | 0 | 3184    | PFKL     | 0 | chr21 | 44568500  |
| 24643   | PFKL     | 0 | 2684    | PFKL     | 0 | chr21 | 44569000  |
| 19796   | BRSK2    | 0 | 52404   | BRSK2    | 0 | chr11 | 1387500   |
| -156900 | PSAPL1   | 0 | 162216  | AFAP1AS  | 0 | chr4  | 7644500   |
| 160     | ACN9     | 0 | 65011   | ACN9     | 0 | chr7  | 96584000  |
| -1698   | C17orf75 | 0 | 6269    | ZNF207   | 0 | chr17 | 27695000  |
| -1167   | KPTN     | 0 | 2202    | NAPA     | 0 | chr19 | 52680500  |
| -1667   | KPTN     | 0 | 1702    | NAPA     | 0 | chr19 | 52681000  |
| -1549   | CADM1    | 0 | 1242100 | BUD13    | 0 | chr11 | 114882000 |
| 1355    | C6orf70  | 0 | 28542   | C6orf70  | 0 | chr6  | 169895000 |
| 31252   | TAF4     | 0 | 59761   | TAF4     | 0 | chr20 | 60014500  |
| 31752   | TAF4     | 0 | 59261   | TAF4     | 0 | chr20 | 60015000  |
| -19     | HCLS1    | 0 | 2237    | GOLGB1   | 0 | chr3  | 122862500 |
| 33025   | KCNQ2    | 0 | 5937    | KCNQ2    | 0 | chr20 | 61568500  |
| 3556    | SLC26A1  | 0 | 2224    | SLC26A1  | 0 | chr4  | 975000    |
| -1050   | DPH5     | 0 | 209892  | S1PR1    | 0 | chr1  | 101265000 |
| 2926    | MIER2    | 0 | 36291   | MIER2    | 0 | chr19 | 259500    |
| 1591    | RNF166   | 0 | 8301    | RNF166   | 0 | chr16 | 87292000  |
| 2091    | RNF166   | 0 | 7801    | RNF166   | 0 | chr16 | 87292500  |
| 18406   | PDGFRB   | 0 | 23615   | PDGFRB   | 0 | chr5  | 149492000 |
| 18906   | PDGFRB   | 0 | 23115   | PDGFRB   | 0 | chr5  | 149492500 |
| 1950    | LAMB2    | 0 | 10103   | LAMB2    | 0 | chr3  | 49135500  |
| 30321   | STEAP4   | 0 | 145     | STEAP4   | 0 | chr7  | 87774000  |
| -566    | KLHL33   | 0 | 16055   | OSGEP    | 0 | chr14 | 19969000  |
| 4527    | KRT28    | 0 | 3237    | KRT28    | 0 | chr17 | 36206500  |
| 5027    | KRT28    | 0 | 2737    | KRT28    | 0 | chr17 | 36207000  |
| 15991   | ITGAX    | 0 | 11819   | ITGAX    | 0 | chr16 | 31290000  |
| 16491   | ITGAX    | 0 | 11319   | ITGAX    | 0 | chr16 | 31290500  |
| 1901    | ACTBL2   | 0 | 893     | ACTBL2   | 0 | chr5  | 56813500  |
| 2401    | ACTBL2   | 0 | 393     | ACTBL2   | 0 | chr5  | 56814000  |
| -298    | LARP4B   | 0 | 102348  | GTPBP4   | 0 | chr10 | 922000    |
| 11160   | LAMB3    | 0 | 25302   | LAMB3    | 0 | chr1  | 207866000 |
| 93161   | DYSF     | 0 | 126900  | DYSF     | 0 | chr2  | 71640500  |
| 94161   | DYSF     | 0 | 125900  | DYSF     | 0 | chr2  | 71641500  |
| -865    | S100A11  | 0 | 46243   | TCHHL1   | 0 | chr1  | 150277000 |
| -1365   | S100A11  | 0 | 45743   | TCHHL1   | 0 | chr1  | 150277500 |
| -14427  | BRDT     | 0 | 1120    | EPHX4    | 0 | chr1  | 92267000  |

|         |                |   |        |                |   |       |           |
|---------|----------------|---|--------|----------------|---|-------|-----------|
| 2278    | POLRMT         | 0 | 14068  | POLRMT         | 0 | chr19 | 570500    |
| 22444   | SLC19A1        | 0 | 5279   | SLC19A1        | 0 | chr21 | 45781500  |
| -1351   | CCNI           | 0 | 79880  | CCNG2          | 0 | chr4  | 78217500  |
| 13931   | MED20          | 0 | 1855   | MED20          | 0 | chr6  | 41995000  |
| 17498   | FASN           | 0 | 2395   | FASN           | 0 | chr17 | 77647000  |
| 17998   | FASN           | 0 | 1895   | FASN           | 0 | chr17 | 77647500  |
| -3078   | ELF5           | 0 | 106243 | EHF            | 0 | chr11 | 34493000  |
| -13823  | CDKL4          | 0 | 5925   | MAP4K3         | 0 | chr2  | 39324000  |
| -14323  | CDKL4          | 0 | 5425   | MAP4K3         | 0 | chr2  | 39324500  |
| 19759   | SLC6A9         | 0 | 1084   | SLC6A9         | 0 | chr1  | 44254500  |
| 20259   | SLC6A9         | 0 | 584    | SLC6A9         | 0 | chr1  | 44255000  |
| 20390   | PIGZ           | 0 | 2101   | PIGZ           | 0 | chr3  | 198178000 |
| 20890   | PIGZ           | 0 | 1601   | PIGZ           | 0 | chr3  | 198178500 |
| 6795    | PDCD1          | 0 | 2231   | PDCD1          | 0 | chr2  | 242447500 |
| -832    | RD116-7,SNORD1 | 0 | 1764   | 6-2,SNORD116-6 | 0 | chr15 | 22859500  |
| 9309    | WDR8           | 0 | 10031  | WDR8           | 0 | chr1  | 3546500   |
| 9809    | WDR8           | 0 | 9531   | WDR8           | 0 | chr1  | 3547000   |
| -307942 | RAPGEF5        | 0 | 62290  | IL6            | 0 | chr7  | 22671000  |
| -308442 | RAPGEF5        | 0 | 61790  | IL6            | 0 | chr7  | 22671500  |
| 118857  | ATP11A         | 0 | 77983  | ATP11A         | 0 | chr13 | 112511500 |
| -131478 | LOC284233      | 0 | 3955   | CXADRP3        | 0 | chr18 | 14464000  |
| -131978 | LOC284233      | 0 | 3455   | CXADRP3        | 0 | chr18 | 14464500  |
| 2065    | CLCN7          | 0 | 28086  | CLCN7          | 0 | chr16 | 1437000   |
| 162912  | ADCY5          | 0 | 1082   | ADCY5          | 0 | chr3  | 124649000 |
| 163412  | ADCY5          | 0 | 582    | ADCY5          | 0 | chr3  | 124649500 |
| -28265  | SFRS8          | 0 | 393    | MMP17          | 0 | chr12 | 130878500 |
| -936    | KCNA4          | 0 | 213138 | FSHB           | 0 | chr11 | 29996000  |
| -243348 | BEND4          | 0 | 1612   | SHISA3         | 0 | chr4  | 42093000  |
| -105039 | ASAP1IT1       | 0 | 378728 | ADCY8          | 0 | chr8  | 131483000 |
| -105539 | ASAP1IT1       | 0 | 378228 | ADCY8          | 0 | chr8  | 131483500 |
| -10811  | SP140L         | 0 | 1614   | SP100          | 0 | chr2  | 230987500 |
| -11311  | SP140L         | 0 | 1114   | SP100          | 0 | chr2  | 230988000 |
| 366231  | TRAPPC9        | 0 | 359860 | TRAPPC9        | 0 | chr8  | 141178000 |
| -1100   | DMWD           | 0 | 1807   | RSPH6A         | 0 | chr19 | 50989000  |
| 82728   | STARD13        | 0 | 216    | STARD13        | 0 | chr13 | 32658000  |
| -284    | STARD13        | 0 | 631705 | RFC3           | 0 | chr13 | 32658500  |
| -1437   | LIPH           | 0 | 32224  | SENP2          | 0 | chr3  | 186754500 |
| -1937   | LIPH           | 0 | 31724  | SENP2          | 0 | chr3  | 186755000 |
| -2269   | STMN1          | 0 | 51344  | PAFAH2         | 0 | chr1  | 26107500  |
| -2769   | STMN1          | 0 | 50844  | PAFAH2         | 0 | chr1  | 26108000  |
| 7138    | CT45A4         | 0 | 901    | CT45A4         | 0 | chrX  | 134763500 |
| 7638    | CT45A4         | 0 | 401    | CT45A4         | 0 | chrX  | 134764000 |
| -99     | CT45A4         | 0 | 9129   | CT45A5         | 0 | chrX  | 134764500 |
| -4455   | CRIP2          | 0 | 2301   | CRIP1          | 0 | chr14 | 105022000 |
| -4955   | CRIP2          | 0 | 1801   | CRIP1          | 0 | chr14 | 105022500 |
| 34831   | RASSF2         | 0 | 8791   | RASSF2         | 0 | chr20 | 4743500   |
| 17130   | ITGB4          | 0 | 15994  | ITGB4          | 0 | chr17 | 71249500  |
| 17630   | ITGB4          | 0 | 15494  | ITGB4          | 0 | chr17 | 71250000  |
| 18130   | ITGB4          | 0 | 14994  | ITGB4          | 0 | chr17 | 71250500  |
| 24858   | GALNS          | 0 | 18375  | GALNS          | 0 | chr16 | 87432500  |
| 25358   | GALNS          | 0 | 17875  | GALNS          | 0 | chr16 | 87433000  |
| 2178    | C2orf90        | 0 | 1011   | C2orf90        | 0 | chr2  | 895000    |
| 2678    | C2orf90        | 0 | 511    | C2orf90        | 0 | chr2  | 895500    |
| 33109   | DGKD           | 0 | 84482  | DGKD           | 0 | chr2  | 233961000 |
| -2550   | RNLS           | 0 | 998    | LIPJ           | 0 | chr10 | 90335500  |
| 10275   | NLGN2          | 0 | 1403   | NLGN2          | 0 | chr17 | 7262500   |
| -463    | NKX2-8         | 0 | 74532  | PAX9           | 0 | chr14 | 36122000  |
| -1463   | NKX2-8         | 0 | 73532  | PAX9           | 0 | chr14 | 36123000  |

|         |               |   |        |               |   |       |           |
|---------|---------------|---|--------|---------------|---|-------|-----------|
| -1963   | NKX2-8        | 0 | 73032  | PAX9          | 0 | chr14 | 36123500  |
| 2087    | WNT7B         | 0 | 54672  | WNT7B         | 0 | chr22 | 44697000  |
| 2587    | WNT7B         | 0 | 54172  | WNT7B         | 0 | chr22 | 44697500  |
| 69986   | ZFPM1         | 0 | 11575  | ZFPM1         | 0 | chr16 | 87117500  |
| -240051 | CDC42BPA      | 0 | 5366   | ZNF678        | 0 | chr1  | 225812500 |
| -240551 | CDC42BPA      | 0 | 4866   | ZNF678        | 0 | chr1  | 225813000 |
| 575     | FGF22         | 0 | 3104   | FGF22         | 0 | chr19 | 591500    |
| 1075    | FGF22         | 0 | 2604   | FGF22         | 0 | chr19 | 592000    |
| -168483 | HAND1         | 0 | 66154  | LARP1         | 0 | chr5  | 154006500 |
| -168983 | HAND1         | 0 | 65654  | LARP1         | 0 | chr5  | 154007000 |
| 588     | TMEM159       | 0 | 21438  | TMEM159       | 0 | chr16 | 21078000  |
| 20318   | SLC25A18      | 0 | 10147  | SLC25A18      | 0 | chr22 | 16443500  |
| 4724    | TMEM8A        | 0 | 6451   | TMEM8A        | 0 | chr16 | 365500    |
| 5224    | TMEM8A        | 0 | 5951   | TMEM8A        | 0 | chr16 | 366000    |
| 30799   | C9orf86       | 0 | 2460   | C9orf86       | 0 | chr9  | 138853000 |
| 31299   | C9orf86       | 0 | 1960   | C9orf86       | 0 | chr9  | 138853500 |
| -86802  | BCL2A1        | 0 | 1575   | ZFAND6        | 0 | chr15 | 78137500  |
| -8400   | FAM176A       | 0 | 77416  | MRPL19        | 0 | chr2  | 75650000  |
| -322    | ALDH3B2       | 0 | 116815 | LOC645332     | 0 | chr11 | 67199000  |
| -822    | ALDH3B2       | 0 | 116315 | LOC645332     | 0 | chr11 | 67199500  |
| 9808    | CYP2F1        | 0 | 4121   | CYP2F1        | 0 | chr19 | 46322000  |
| 10308   | CYP2F1        | 0 | 3621   | CYP2F1        | 0 | chr19 | 46322500  |
| 671     | KLHL17        | 0 | 4458   | KLHL17        | 0 | chr1  | 886500    |
| -2646   | TFAMP1        | 0 | 125132 | ELFN1         | 0 | chr7  | 1625500   |
| -3146   | TFAMP1        | 0 | 124632 | ELFN1         | 0 | chr7  | 1626000   |
| -218772 | SKOR1         | 0 | 1625   | PIAS1         | 0 | chr15 | 66132000  |
| -219272 | SKOR1         | 0 | 1125   | PIAS1         | 0 | chr15 | 66132500  |
| 87001   | JPH3          | 0 | 8262   | JPH3          | 0 | chr16 | 86281000  |
| -25725  | EIF2C4        | 0 | 1896   | EIF2C1        | 0 | chr1  | 36119500  |
| -958    | TTF1          | 0 | 2431   | C9orf171      | 0 | chr9  | 134273000 |
| -1458   | TTF1          | 0 | 1931   | C9orf171      | 0 | chr9  | 134273500 |
| -859    | RNF183        | 0 | 15751  | WDR31         | 0 | chr9  | 115102000 |
| -1359   | RNF183        | 0 | 15251  | WDR31         | 0 | chr9  | 115102500 |
| -1859   | RNF183        | 0 | 14751  | WDR31         | 0 | chr9  | 115103000 |
| -14515  | GSR           | 0 | 1731   | UBXN8         | 0 | chr8  | 30719500  |
| -15015  | GSR           | 0 | 1231   | UBXN8         | 0 | chr8  | 30720000  |
| -151    | PLEKHM2       | 0 | 1395   | SLC25A34      | 0 | chr1  | 15934000  |
| 12107   | MMP17         | 0 | 11269  | MMP17         | 0 | chr12 | 130891000 |
| -8846   | CT45A1        | 0 | 379    | CT45A4,CT45A2 | 0 | chrX  | 134693500 |
| 121     | CT45A4,CT45A2 | 0 | 25185  | CT45A4,CT45A2 | 0 | chrX  | 134694000 |
| 6759    | CACNA1H       | 0 | 61773  | CACNA1H       | 0 | chr16 | 1150000   |
| 7259    | CACNA1H       | 0 | 61273  | CACNA1H       | 0 | chr16 | 1150500   |
| -1375   | CD47          | 0 | 68348  | IFT57         | 0 | chr3  | 109294000 |
| 457     | ZNF787        | 0 | 33461  | ZNF787        | 0 | chr19 | 61291000  |
| -259    | SFTA3         | 0 | 2352   | NKX2-1        | 0 | chr14 | 36053000  |
| -759    | SFTA3         | 0 | 1852   | NKX2-1        | 0 | chr14 | 36053500  |
| 69787   | HRH1          | 0 | 38939  | HRH1          | 0 | chr3  | 11241000  |
| -13629  | TSPAN14       | 0 | 1637   | SH2D4B        | 0 | chr10 | 82286000  |
| 24059   | MTFR1         | 0 | 41852  | MTFR1         | 0 | chr8  | 66743500  |
| 42459   | BAIAP2        | 0 | 32907  | BAIAP2        | 0 | chr17 | 76666000  |
| 43459   | BAIAP2        | 0 | 31907  | BAIAP2        | 0 | chr17 | 76667000  |
| -1229   | MLN           | 0 | 216605 | GRM4          | 0 | chr6  | 33881000  |
| 2621    | ZNF469        | 0 | 10666  | ZNF469        | 0 | chr16 | 87024000  |
| 3121    | ZNF469        | 0 | 10166  | ZNF469        | 0 | chr16 | 87024500  |
| -1723   | C7orf52       | 0 | 13732  | MOGAT3        | 0 | chr7  | 100612000 |
| -35586  | PTPN3         | 0 | 106892 | PALM2         | 0 | chr9  | 111336000 |
| -36086  | PTPN3         | 0 | 106392 | PALM2         | 0 | chr9  | 111336500 |
| 14599   | PRSS54        | 0 | 452    | PRSS54        | 0 | chr16 | 56886000  |

|         |              |   |        |             |   |       |           |
|---------|--------------|---|--------|-------------|---|-------|-----------|
| 4290    | MGAT4B       | 0 | 5547   | MGAT4B      | 0 | chr5  | 179161000 |
| -2026   | GGT3P        | 0 | 112235 | DGCR6       | 0 | chr22 | 17161500  |
| 27816   | NFYA         | 0 | 1623   | NFYA        | 0 | chr6  | 41176500  |
| 7832    | PARVG        | 0 | 26367  | PARVG       | 0 | chr22 | 42908000  |
| 1436    | DND1         | 0 | 1355   | DND1        | 0 | chr5  | 140032000 |
| -147218 | FKSG29       | 0 | 2228   | TM9SF2      | 0 | chr13 | 98949500  |
| 49400   | MEGF8        | 0 | 3761   | MEGF8       | 0 | chr19 | 47571000  |
| 1009    | LOC441956    | 0 | 830    | LOC441956   | 0 | chr21 | 13974500  |
| -1527   | ARSA         | 0 | 44935  | SHANK3      | 0 | chr22 | 49415000  |
| -4874   | SNORA36A     | 0 | 1466   | SNORA56     | 0 | chrX  | 153655000 |
| 1445    | KIAA1324     | 0 | 87877  | KIAA1324    | 0 | chr1  | 109459500 |
| 2553    | KCNH2        | 0 | 25947  | KCNH2       | 0 | chr7  | 150280000 |
| 3053    | KCNH2        | 0 | 25447  | KCNH2       | 0 | chr7  | 150280500 |
| 125     | RNF151       | 0 | 1977   | RNF151      | 0 | chr16 | 1957000   |
| 292     | ZBTB45       | 0 | 5733   | ZBTB45      | 0 | chr19 | 63717000  |
| 19142   | PCNXL3       | 0 | 1986   | PCNXL3      | 0 | chr11 | 65159500  |
| 19642   | PCNXL3       | 0 | 1486   | PCNXL3      | 0 | chr11 | 65160000  |
| 62119   | LRRC2        | 0 | 2576   | LRRC2       | 0 | chr3  | 46594000  |
| 317     | TDGF1        | 0 | 4456   | TDGF1       | 0 | chr3  | 46594500  |
| 106     | OR12D2       | 0 | 927    | OR12D2      | 0 | chr6  | 29472500  |
| 606     | P2RY6        | 0 | 25812  | P2RY6       | 0 | chr11 | 72661500  |
| -172147 | ANKRD57      | 0 | 1623   | RGPD5,RGPD6 | 0 | chr2  | 109906000 |
| 1808    | NME4         | 0 | 1755   | NME4        | 0 | chr16 | 389000    |
| 8473    | LGR6         | 0 | 107512 | LGR6        | 0 | chr1  | 200448000 |
| 67959   | BAIAP2       | 0 | 7407   | BAIAP2      | 0 | chr17 | 76691500  |
| 68459   | BAIAP2       | 0 | 6907   | BAIAP2      | 0 | chr17 | 76692000  |
| -1933   | EXOSC3       | 0 | 13789  | DCAF10      | 0 | chr9  | 37777000  |
| 63877   | KDM4B        | 0 | 120608 | KDM4B       | 0 | chr19 | 4984000   |
| -26075  | BANP         | 0 | 326879 | ZNF469      | 0 | chr16 | 86694500  |
| -26575  | BANP         | 0 | 326379 | ZNF469      | 0 | chr16 | 86695000  |
| 7371    | CT45A5       | 0 | 660    | CT45A5      | 0 | chrX  | 134781000 |
| 74858   | ANO6         | 0 | 149454 | ANO6        | 0 | chr12 | 43971000  |
| 75358   | ANO6         | 0 | 148954 | ANO6        | 0 | chr12 | 43971500  |
| -23680  | CD177        | 0 | 1602   | TEX101      | 0 | chr19 | 48583000  |
| -24180  | CD177        | 0 | 1102   | TEX101      | 0 | chr19 | 48583500  |
| 31135   | MEGF6        | 0 | 92419  | MEGF6       | 0 | chr1  | 3425500   |
| 31635   | MEGF6        | 0 | 91919  | MEGF6       | 0 | chr1  | 3426000   |
| -551    | SLC22A2      | 0 | 88914  | SLC22A3     | 0 | chr6  | 160600500 |
| 22096   | POLD1        | 0 | 11583  | POLD1       | 0 | chr19 | 55601500  |
| 22596   | POLD1        | 0 | 11083  | POLD1       | 0 | chr19 | 55602000  |
| -123791 | CCDC74A      | 0 | 65033  | C2orf27A    | 0 | chr2  | 132131500 |
| -124291 | CCDC74A      | 0 | 64533  | C2orf27A    | 0 | chr2  | 132132000 |
| -92502  | KCTD1        | 0 | 46582  | LOC728606   | 0 | chr18 | 22475000  |
| 4242    | KRT13        | 0 | 391    | KRT13       | 0 | chr17 | 36915000  |
| 36481   | PSTPIP1      | 0 | 5726   | PSTPIP1     | 0 | chr15 | 75111000  |
| 37481   | PSTPIP1      | 0 | 4726   | PSTPIP1     | 0 | chr15 | 75112000  |
| 34188   | KIF26A       | 0 | 7988   | KIF26A      | 0 | chr14 | 103709000 |
| -1306   | C22orf34     | 0 | 114440 | BRD1        | 0 | chr22 | 48438500  |
| -1936   | KCNA4        | 0 | 212138 | FSHB        | 0 | chr11 | 29997000  |
| -1060   | HECTD1       | 0 | 83244  | HEATR5A     | 0 | chr14 | 30747500  |
| -1560   | HECTD1       | 0 | 82744  | HEATR5A     | 0 | chr14 | 30748000  |
| -112    | NXF2         | 0 | 41765  | TMSB15A     | 0 | chrX  | 101613500 |
| -64707  | LOC100129387 | 0 | 1370   | USP8        | 0 | chr15 | 48502500  |
| -65207  | LOC100129387 | 0 | 870    | USP8        | 0 | chr15 | 48503000  |
| 1093    | NR2E1        | 0 | 21704  | NR2E1       | 0 | chr6  | 108595000 |
| 1593    | NR2E1        | 0 | 21204  | NR2E1       | 0 | chr6  | 108595500 |
| 10693   | PRMT1        | 0 | 516    | PRMT1       | 0 | chr19 | 54883000  |
| 11193   | PRMT1        | 0 | 16     | PRMT1       | 0 | chr19 | 54883500  |



|          |               |   |         |          |   |       |           |
|----------|---------------|---|---------|----------|---|-------|-----------|
| 247      | C19orf76      | 0 | 2059    | C19orf76 | 0 | chr19 | 54884000  |
| 2724     | TMEM8A        | 0 | 8451    | TMEM8A   | 0 | chr16 | 363500    |
| 3224     | TMEM8A        | 0 | 7951    | TMEM8A   | 0 | chr16 | 364000    |
| -12629   | TSPAN14       | 0 | 2637    | SH2D4B   | 0 | chr10 | 82285000  |
| 71369    | DIP2C         | 0 | 344108  | DIP2C    | 0 | chr10 | 381500    |
| 438      | SLC4A11       | 0 | 9873    | SLC4A11  | 0 | chr20 | 3156500   |
| -2225102 | NRXN1         | 0 | 1097121 | ASB3     | 0 | chr2  | 52653500  |
| -139029  | ZSCAN5A       | 0 | 779     | ZNF542   | 0 | chr19 | 61570500  |
| 63       | RTN4R         | 0 | 26816   | RTN4R    | 0 | chr22 | 18609000  |
| -12473   | NKX6-2        | 0 | 9886    | C10orf92 | 0 | chr10 | 134462000 |
| 3391     | PAF1          | 0 | 2019    | PAF1     | 0 | chr19 | 44571500  |
| 3891     | PAF1          | 0 | 1519    | PAF1     | 0 | chr19 | 44572000  |
| -77251   | PRKAG2        | 0 | 1943    | GALNTL5  | 0 | chr7  | 151282500 |
| -5342    | NRF1          | 0 | 70730   | UBE2H    | 0 | chr7  | 129189500 |
| -21941   | FAM20C        | 0 | 177424  | PDGFA    | 0 | chr7  | 326000    |
| 282      | RBMXL3        | 0 | 3187    | RBMXL3   | 0 | chrX  | 114330500 |
| 664490   | PTPRN2        | 0 | 384243  | PTPRN2   | 0 | chr7  | 157689000 |
| 664990   | PTPRN2        | 0 | 383743  | PTPRN2   | 0 | chr7  | 157689500 |
| -459     | TMEM163       | 0 | 119155  | ACMSD    | 0 | chr2  | 135193500 |
| -794887  | RD20A3,ANKRD2 | 0 | 15063   | PGM5P2   | 0 | chr9  | 68355000  |
| 13054    | BTBD2         | 0 | 17202   | BTBD2    | 0 | chr19 | 1949500   |
| 13554    | BTBD2         | 0 | 16702   | BTBD2    | 0 | chr19 | 1950000   |
| -20761   | OR2T33        | 0 | 40      | OR2T12   | 0 | chr1  | 246524500 |
| 460      | OR2T12        | 0 | 503     | OR2T12   | 0 | chr1  | 246525000 |
| -23295   | AKR1B10       | 0 | 772     | AKR1B15  | 0 | chr7  | 133900000 |
| -7348    | RAD54L2       | 0 | 261     | TEX264   | 0 | chr3  | 51680000  |
| 5440     | MAP2K3        | 0 | 25144   | MAP2K3   | 0 | chr17 | 21134000  |
| 21862    | C6orf52       | 0 | 1516    | C6orf52  | 0 | chr6  | 10801500  |
| 3271     | CARD9         | 0 | 6454    | CARD9    | 0 | chr9  | 138381500 |
| 3771     | CARD9         | 0 | 5954    | CARD9    | 0 | chr9  | 138382000 |
| 1941     | PYCR1         | 0 | 2759    | PYCR1    | 0 | chr17 | 77485500  |
| -614274  | ERICH1        | 0 | 151475  | DLGAP2   | 0 | chr8  | 1285500   |
| -614774  | ERICH1        | 0 | 150975  | DLGAP2   | 0 | chr8  | 1286000   |
| -615274  | ERICH1        | 0 | 150475  | DLGAP2   | 0 | chr8  | 1286500   |
| -615774  | ERICH1        | 0 | 149975  | DLGAP2   | 0 | chr8  | 1287000   |
| -21259   | NCR3          | 0 | 972     | AIF1     | 0 | chr6  | 31690000  |
| -51      | CASQ2         | 0 | 67521   | NHLH2    | 0 | chr1  | 116113000 |
| -11242   | ADRBK2        | 0 | 1619    | MYO18B   | 0 | chr22 | 24466500  |
| 55052    | TNRC18        | 0 | 61703   | TNRC18   | 0 | chr7  | 5368000   |
| 233655   | CLEC16A       | 0 | 4045    | CLEC16A  | 0 | chr16 | 11179500  |
| 234155   | CLEC16A       | 0 | 3545    | CLEC16A  | 0 | chr16 | 11180000  |
| 21990    | GLT25D1       | 0 | 5465    | GLT25D1  | 0 | chr19 | 17549500  |
| 13042    | NEK8          | 0 | 911     | NEK8     | 0 | chr17 | 24093000  |
| -1186    | LRP8          | 0 | 109131  | FLJ40434 | 0 | chr1  | 53567500  |
| 116462   | BANP          | 0 | 9425    | BANP     | 0 | chr16 | 86659000  |
| -10590   | TIMM17A       | 0 | 1388    | RNPEP    | 0 | chr1  | 200217000 |
| -11090   | TIMM17A       | 0 | 888     | RNPEP    | 0 | chr1  | 200217500 |
| 3750     | TIE1          | 0 | 18366   | TIE1     | 0 | chr1  | 43543000  |
| 4250     | TIE1          | 0 | 17866   | TIE1     | 0 | chr1  | 43543500  |
| -714     | SLC6A16       | 0 | 9488    | CD37     | 0 | chr19 | 54521000  |
| -1214    | SLC6A16       | 0 | 8988    | CD37     | 0 | chr19 | 54521500  |
| 4026     | ACP5          | 0 | 301     | ACP5     | 0 | chr19 | 11550500  |
| -1446    | C10orf93      | 0 | 143898  | GPR123   | 0 | chr10 | 134607500 |
| 13259    | CACNA1H       | 0 | 55273   | CACNA1H  | 0 | chr16 | 1156500   |
| 14259    | CACNA1H       | 0 | 54273   | CACNA1H  | 0 | chr16 | 1157500   |
| -1333    | OR7A17        | 0 | 58800   | OR7C2    | 0 | chr19 | 14854500  |
| 667047   | CDH4          | 0 | 17694   | CDH4     | 0 | chr20 | 59928000  |
| 667547   | CDH4          | 0 | 17194   | CDH4     | 0 | chr20 | 59928500  |

|         |            |   |        |            |   |       |           |
|---------|------------|---|--------|------------|---|-------|-----------|
| 4440    | MAP2K3     | 0 | 26144  | MAP2K3     | 0 | chr17 | 21133000  |
| 34355   | SCN4A      | 0 | 10     | SCN4A      | 0 | chr17 | 59404000  |
| 3475    | RNF126     | 0 | 12227  | RNF126     | 0 | chr19 | 602000    |
| -50356  | WDR60      | 0 | 11805  | LOC154822  | 0 | chr7  | 158482000 |
| -50856  | WDR60      | 0 | 11305  | LOC154822  | 0 | chr7  | 158482500 |
| -1637   | KRCC1      | 0 | 10496  | SMYD1      | 0 | chr2  | 88138000  |
| 570     | RAGE       | 0 | 75784  | RAGE       | 0 | chr14 | 101765500 |
| -63609  | CYP46A1    | 0 | 2497   | EML1       | 0 | chr14 | 99327000  |
| -124759 | XAGE2B     | 0 | 985    | XAGE1D     | 0 | chrX  | 52527500  |
| -125259 | XAGE2B     | 0 | 485    | XAGE1D     | 0 | chrX  | 52528000  |
| -892135 | ST3GAL1    | 0 | 13712  | ZFAT       | 0 | chr8  | 135545500 |
| -892635 | ST3GAL1    | 0 | 13212  | ZFAT       | 0 | chr8  | 135546000 |
| -893135 | ST3GAL1    | 0 | 12712  | ZFAT       | 0 | chr8  | 135546500 |
| -893635 | ST3GAL1    | 0 | 12212  | ZFAT       | 0 | chr8  | 135547000 |
| -894135 | ST3GAL1    | 0 | 11712  | ZFAT       | 0 | chr8  | 135547500 |
| -894635 | ST3GAL1    | 0 | 11212  | ZFAT       | 0 | chr8  | 135548000 |
| 2970    | RLTPR      | 0 | 9473   | RLTPR      | 0 | chr16 | 66239500  |
| 208945  | SNX29      | 0 | 313147 | SNX29      | 0 | chr16 | 12262500  |
| 209445  | SNX29      | 0 | 312647 | SNX29      | 0 | chr16 | 12263000  |
| -2029   | FGFR2      | 0 | 147114 | ATE1       | 0 | chr10 | 123345500 |
| 1481    | NCRNA00245 | 0 | 3745   | NCRNA00245 | 0 | chr10 | 76835000  |
| 1981    | NCRNA00245 | 0 | 3245   | NCRNA00245 | 0 | chr10 | 76835500  |
| 104039  | ADCY10     | 0 | 577    | ADCY10     | 0 | chr1  | 166149500 |
| 104539  | ADCY10     | 0 | 77     | ADCY10     | 0 | chr1  | 166150000 |
| 4769    | NRN1       | 0 | 4632   | NRN1       | 0 | chr6  | 5948000   |
| -598    | FAM83H     | 0 | 56577  | SCRIB      | 0 | chr8  | 144888500 |
| 20087   | NCOR2      | 0 | 191102 | NCOR2      | 0 | chr12 | 123395000 |
| 41479   | HRNBP3     | 0 | 351658 | HRNBP3     | 0 | chr17 | 74638500  |
| 41979   | HRNBP3     | 0 | 351158 | HRNBP3     | 0 | chr17 | 74639000  |
| -24727  | SBNO2      | 0 | 48797  | STK11      | 0 | chr19 | 1108000   |
| -4648   | SLC7A2     | 0 | 1985   | PDGFRL     | 0 | chr8  | 17477000  |
| -5148   | SLC7A2     | 0 | 1485   | PDGFRL     | 0 | chr8  | 17477500  |
| -1469   | C21orf84   | 0 | 49499  | HSF2BP     | 0 | chr21 | 43724000  |
| 164     | XGPY2      | 0 | 22537  | XGPY2      | 0 | chrY  | 2680500   |
| -456    | SRD5A2     | 0 | 286397 | MEMO1      | 0 | chr2  | 31660000  |
| 16195   | LOC154822  | 0 | 1689   | LOC154822  | 0 | chr7  | 158510000 |
| 27555   | HPS4       | 0 | 4820   | HPS4       | 0 | chr22 | 25205000  |
| 3055    | GAD1       | 0 | 23015  | GAD1       | 0 | chr2  | 171384500 |
| 3555    | GAD1       | 0 | 22515  | GAD1       | 0 | chr2  | 171385000 |
| -4431   | WDR18      | 0 | 1436   | GRIN3B     | 0 | chr19 | 950000    |
| 74475   | TTLL11     | 0 | 197206 | TTLL11     | 0 | chr9  | 123698500 |
| 74975   | TTLL11     | 0 | 196706 | TTLL11     | 0 | chr9  | 123699000 |
| 40798   | EIF2AK2    | 0 | 469    | EIF2AK2    | 0 | chr2  | 37228000  |
| -5305   | HIST1H1D   | 0 | 132    | HIST1H4F   | 0 | chr6  | 26348500  |
| 98751   | ANKRD26P1  | 0 | 1010   | ANKRD26P1  | 0 | chr16 | 45159500  |
| -3753   | FAM22F     | 0 | 42153  | HIATL1     | 0 | chr9  | 96134500  |
| -928    | ZNF239     | 0 | 30860  | ZNF485     | 0 | chr10 | 43391000  |
| 22545   | ATG16L1    | 0 | 21559  | ATG16L1    | 0 | chr2  | 233847500 |
| -231    | CD7        | 0 | 3188   | SECTM1     | 0 | chr17 | 77869000  |
| 32759   | CACNA1H    | 0 | 35773  | CACNA1H    | 0 | chr16 | 1176000   |
| -49036  | GRTP1      | 0 | 8760   | ADPRHL1    | 0 | chr13 | 113115500 |
| -49536  | GRTP1      | 0 | 8260   | ADPRHL1    | 0 | chr13 | 113116000 |
| 4770    | LRRC27     | 0 | 44500  | LRRC27     | 0 | chr10 | 134000500 |
| -91479  | LAMA4      | 0 | 1224   | RFPL4B     | 0 | chr6  | 112774000 |
| -91979  | LAMA4      | 0 | 724    | RFPL4B     | 0 | chr6  | 112774500 |
| -39086  | N4BP2      | 0 | 2421   | RHOH       | 0 | chr4  | 39872500  |
| 39935   | UHRF1      | 0 | 11665  | UHRF1      | 0 | chr19 | 4901500   |
| -70     | POU5F1     | 0 | 2990   | PSORS1C3   | 0 | chr6  | 31246500  |

|         |              |   |        |            |   |       |           |
|---------|--------------|---|--------|------------|---|-------|-----------|
| 224     | OR2T33       | 0 | 739    | OR2T33     | 0 | chr1  | 246503000 |
| 509     | LOC441956    | 0 | 1330   | LOC441956  | 0 | chr21 | 13974000  |
| -499097 | ADAM6        | 0 | 999    | NCRNA00221 | 0 | chr14 | 106008500 |
| -499597 | ADAM6        | 0 | 499    | NCRNA00221 | 0 | chr14 | 106009000 |
| 49008   | THAP4        | 0 | 3828   | THAP4      | 0 | chr2  | 242221500 |
| 1460    | SIX3         | 0 | 1894   | SIX3       | 0 | chr2  | 45024000  |
| -137    | CCDC11       | 0 | 2213   | MBD1       | 0 | chr18 | 46047000  |
| -637    | CCDC11       | 0 | 1713   | MBD1       | 0 | chr18 | 46047500  |
| -201    | GPR132       | 0 | 76120  | JAG2       | 0 | chr14 | 104603000 |
| -1675   | TMPRSS13     | 0 | 55315  | IL10RA     | 0 | chr11 | 117307000 |
| -2175   | TMPRSS13     | 0 | 54815  | IL10RA     | 0 | chr11 | 117307500 |
| 119769  | WDR27        | 0 | 125084 | WDR27      | 0 | chr6  | 169719000 |
| -110687 | LAMA1        | 0 | 2636   | LRRC30     | 0 | chr18 | 7218500   |
| -111187 | LAMA1        | 0 | 2136   | LRRC30     | 0 | chr18 | 7219000   |
| 18025   | HK3          | 0 | 439    | HK3        | 0 | chr5  | 176258500 |
| -651    | MAP3K5       | 0 | 29394  | PEX7       | 0 | chr6  | 137156000 |
| 29051   | H6PD         | 0 | 7481   | H6PD       | 0 | chr1  | 9246500   |
| 29551   | H6PD         | 0 | 6981   | H6PD       | 0 | chr1  | 9247000   |
| 30051   | H6PD         | 0 | 6481   | H6PD       | 0 | chr1  | 9247500   |
| 27076   | KIAA0182     | 0 | 35811  | KIAA0182   | 0 | chr16 | 84231500  |
| 27576   | KIAA0182     | 0 | 35311  | KIAA0182   | 0 | chr16 | 84232000  |
| -110891 | CBFA2T3      | 0 | 41754  | ACSF3      | 0 | chr16 | 87646000  |
| -105689 | NFATC1       | 0 | 44788  | CTDP1      | 0 | chr18 | 75496000  |
| 4963    | PCDHGA2      | 0 | 169230 | PCDHGA2    | 0 | chr5  | 140703500 |
| 216     | PCDHGA3      | 0 | 168730 | PCDHGA3    | 0 | chr5  | 140704000 |
| -118941 | LOC100130238 | 0 | 90729  | FBRSL1     | 0 | chr12 | 131486500 |
| 5881    | KRT9         | 0 | 336    | KRT9       | 0 | chr17 | 36981500  |
| 1034    | C1QL4        | 0 | 3738   | C1QL4      | 0 | chr12 | 48013500  |
| 5150    | CLDN19       | 0 | 2012   | CLDN19     | 0 | chr1  | 42976500  |
| 10800   | RPS6KA4      | 0 | 2263   | RPS6KA4    | 0 | chr11 | 63894000  |
| -1488   | POM121L1P    | 0 | 281    | GGTLC2     | 0 | chr22 | 21318500  |
| -26270  | SH3TC1       | 0 | 2391   | HTRA3      | 0 | chr4  | 8320000   |
| 5698    | FAM86A       | 0 | 7790   | FAM86A     | 0 | chr16 | 5080000   |
| 6198    | FAM86A       | 0 | 7290   | FAM86A     | 0 | chr16 | 5080500   |
| -14966  | NQQ1         | 0 | 274    | NOB1       | 0 | chr16 | 68333000  |
| 226     | NOB1         | 0 | 12830  | NOB1       | 0 | chr16 | 68333500  |
| 726     | NOB1         | 0 | 12330  | NOB1       | 0 | chr16 | 68334000  |
| -849    | CDK11A       | 0 | 7040   | SLC35E2    | 0 | chr1  | 1646500   |
| 58      | OR2T8        | 0 | 881    | OR2T8      | 0 | chr1  | 246151000 |
| -43527  | ARSA         | 0 | 2935   | SHANK3     | 0 | chr22 | 49457000  |
| -44027  | ARSA         | 0 | 2435   | SHANK3     | 0 | chr22 | 49457500  |
| 37149   | COL18A1      | 0 | 21062  | COL18A1    | 0 | chr21 | 45737000  |
| 3957    | FAM70B       | 0 | 48873  | FAM70B     | 0 | chr13 | 113603000 |
| 4457    | FAM70B       | 0 | 48373  | FAM70B     | 0 | chr13 | 113603500 |
| -87692  | CBX4         | 0 | 12913  | TBC1D16    | 0 | chr17 | 75515500  |
| -88192  | CBX4         | 0 | 12413  | TBC1D16    | 0 | chr17 | 75516000  |
| -65620  | IRX4         | 0 | 797780 | IRX2       | 0 | chr5  | 2001500   |
| -66120  | IRX4         | 0 | 797280 | IRX2       | 0 | chr5  | 2002000   |
| 2955    | SYT3         | 0 | 13114  | SYT3       | 0 | chr19 | 55820000  |
| -701    | GPR132       | 0 | 75620  | JAG2       | 0 | chr14 | 104603500 |
| -1201   | GPR132       | 0 | 75120  | JAG2       | 0 | chr14 | 104604000 |
| 41675   | SIRPA        | 0 | 3040   | SIRPA      | 0 | chr20 | 1865500   |
| 42175   | SIRPA        | 0 | 2540   | SIRPA      | 0 | chr20 | 1866000   |
| 7754    | MIB2         | 0 | 7348   | MIB2       | 0 | chr1  | 1548500   |
| 940     | CSDE1        | 0 | 40147  | CSDE1      | 0 | chr1  | 115062000 |
| 1440    | CSDE1        | 0 | 39647  | CSDE1      | 0 | chr1  | 115062500 |
| 3269    | TMEM204      | 0 | 17744  | TMEM204    | 0 | chr16 | 1527500   |
| 3769    | TMEM204      | 0 | 17244  | TMEM204    | 0 | chr16 | 1528000   |

|         |                 |   |         |                |   |       |           |
|---------|-----------------|---|---------|----------------|---|-------|-----------|
| 20733   | CBFA2T3         | 0 | 45609   | CBFA2T3        | 0 | chr16 | 87489500  |
| 29929   | LOC646982       | 0 | 143     | LOC646982      | 0 | chr13 | 39953000  |
| -34925  | SRPX            | 0 | 13366   | RPGR           | 0 | chrX  | 38000000  |
| -35425  | SRPX            | 0 | 12866   | RPGR           | 0 | chrX  | 38000500  |
| 1589    | ARC             | 0 | 1835    | ARC            | 0 | chr8  | 143691000 |
| 2089    | ARC             | 0 | 1335    | ARC            | 0 | chr8  | 143691500 |
| 2589    | ARC             | 0 | 835     | ARC            | 0 | chr8  | 143692000 |
| -221555 | CNKSR3          | 0 | 1203    | RBM16          | 0 | chr6  | 155095000 |
| -77939  | GRAP            | 0 | 2506    | GRAPL          | 0 | chr17 | 18969000  |
| -78439  | GRAP            | 0 | 2006    | GRAPL          | 0 | chr17 | 18969500  |
| 14845   | MCF2L           | 0 | 104363  | MCF2L          | 0 | chr13 | 112696500 |
| -1304   | ATPBD4          | 0 | 1032103 | C15orf41       | 0 | chr15 | 33627000  |
| -1804   | ATPBD4          | 0 | 1031603 | C15orf41       | 0 | chr15 | 33627500  |
| -757    | PTPRN2          | 0 | 42763   | NCAPG2         | 0 | chr7  | 158074000 |
| 68866   | LMF1            | 0 | 48485   | LMF1           | 0 | chr16 | 912500    |
| -698    | CYP2W1          | 0 | 6648    | C7orf50        | 0 | chr7  | 996500    |
| 6       | FOXI1           | 0 | 3807    | FOXI1          | 0 | chr5  | 169465500 |
| 506     | FOXI1           | 0 | 3307    | FOXI1          | 0 | chr5  | 169466000 |
| -4761   | ESPNP           | 0 | 29988   | MST1P9         | 0 | chr1  | 16924000  |
| 14145   | METRNL          | 0 | 1011    | METRNL         | 0 | chr17 | 78645000  |
| -54717  | CROCCP3         | 0 | 16498   | NBPF1          | 0 | chr1  | 16746500  |
| -55217  | CROCCP3         | 0 | 15998   | NBPF1          | 0 | chr1  | 16747000  |
| -33871  | FLJ42627        | 0 | 2495    | KCTD5          | 0 | chr16 | 2670000   |
| -34371  | FLJ42627        | 0 | 1995    | KCTD5          | 0 | chr16 | 2670500   |
| 17337   | GNAS            | 0 | 2145    | GNAS           | 0 | chr20 | 56917500  |
| 17837   | GNAS            | 0 | 1645    | GNAS           | 0 | chr20 | 56918000  |
| -80280  | MRP63           | 0 | 117007  | ZDHC20         | 0 | chr13 | 20731500  |
| -80780  | MRP63           | 0 | 116507  | ZDHC20         | 0 | chr13 | 20732000  |
| 39214   | TERT            | 0 | 2662    | TERT           | 0 | chr5  | 1345500   |
| 25237   | PLVAP           | 0 | 637     | PLVAP          | 0 | chr19 | 17348500  |
| -1047   | KCNC1           | 0 | 9171    | SERGEF         | 0 | chr11 | 17757000  |
| 90372   | 'TPN20B,PTPN20, | 0 | 509     | PN20B,PTPN20A  | 0 | chr10 | 46060500  |
| -2728   | LOC126536       | 0 | 2285    | FLJ25328       | 0 | chr19 | 16002000  |
| -3228   | LOC126536       | 0 | 1785    | FLJ25328       | 0 | chr19 | 16002500  |
| -1635   | ETFA            | 0 | 23701   | ISL2           | 0 | chr15 | 74392500  |
| 58223   | SUN1            | 0 | 65      | SUN1           | 0 | chr7  | 881000    |
| -18717  | FAT3            | 0 | 54436   | MTNR1B         | 0 | chr11 | 92288000  |
| 909     | ALPP            | 0 | 3343    | ALPP           | 0 | chr2  | 232952500 |
| -1871   | 25B,FAM25G,FAM  | 0 | 1230    | ANXA8          | 0 | chr10 | 47874000  |
| 35650   | RAB11FIP3       | 0 | 11981   | RAB11FIP3      | 0 | chr16 | 500500    |
| 36150   | RAB11FIP3       | 0 | 11481   | RAB11FIP3      | 0 | chr16 | 501000    |
| 36650   | RAB11FIP3       | 0 | 10981   | RAB11FIP3      | 0 | chr16 | 501500    |
| 35204   | SPTBN2          | 0 | 946     | SPTBN2         | 0 | chr11 | 66244500  |
| 35704   | SPTBN2          | 0 | 446     | SPTBN2         | 0 | chr11 | 66245000  |
| -54     | SPTBN2          | 0 | 23282   | C11orf80       | 0 | chr11 | 66245500  |
| 796     | GLYR1           | 0 | 43304   | GLYR1          | 0 | chr16 | 4794000   |
| 1       | NCRNA00221      | 0 | 13074   | NCRNA00221     | 0 | chr14 | 106009500 |
| 3943    | RHBDF1          | 0 | 10629   | RHBDF1         | 0 | chr16 | 52000     |
| 4443    | RHBDF1          | 0 | 10129   | RHBDF1         | 0 | chr16 | 52500     |
| 4943    | RHBDF1          | 0 | 9629    | RHBDF1         | 0 | chr16 | 53000     |
| 40407   | KIF17           | 0 | 13404   | KIF17          | 0 | chr1  | 20903500  |
| 30087   | TTC25           | 0 | 694     | TTC25          | 0 | chr17 | 37370500  |
| 30587   | TTC25           | 0 | 194     | TTC25          | 0 | chr17 | 37371000  |
| 5435    | UHRF1           | 0 | 46165   | UHRF1          | 0 | chr19 | 4867000   |
| 5935    | UHRF1           | 0 | 45665   | UHRF1          | 0 | chr19 | 4867500   |
| -453003 | MCTP2           | 0 | 576825  | LOC145820      | 0 | chr15 | 93200500  |
| -3283   | 20B,PRR20A,PRR  | 0 | 266     | ,PRR20D,PRR20E | 0 | chr13 | 56632500  |
| -197    | PTCHD3          | 0 | 89754   | RAB18          | 0 | chr10 | 27743500  |

|         |           |   |         |         |   |       |           |
|---------|-----------|---|---------|---------|---|-------|-----------|
| -1961   | TRPV3     | 0 | 5489    | TRPV1   | 0 | chr17 | 3410000   |
| -707916 | GALR1     | 0 | 1022262 | SALL3   | 0 | chr18 | 73819000  |
| -708416 | GALR1     | 0 | 1021762 | SALL3   | 0 | chr18 | 73819500  |
| -708916 | GALR1     | 0 | 1021262 | SALL3   | 0 | chr18 | 73820000  |
| 47561   | RGS7      | 0 | 534101  | RGS7    | 0 | chr1  | 239053000 |
| -68637  | NRXN2     | 0 | 14958   | RASGRP2 | 0 | chr11 | 64236000  |
| -199575 | BANP      | 0 | 153379  | ZNF469  | 0 | chr16 | 86868000  |
| -200075 | BANP      | 0 | 152879  | ZNF469  | 0 | chr16 | 86868500  |
| -200575 | BANP      | 0 | 152379  | ZNF469  | 0 | chr16 | 86869000  |
| -201075 | BANP      | 0 | 151879  | ZNF469  | 0 | chr16 | 86869500  |
| -364558 | POTEG     | 0 | 34453   | POTEM   | 0 | chr14 | 19019500  |
| -365058 | POTEG     | 0 | 33953   | POTEM   | 0 | chr14 | 19020000  |
| 7991    | ATP13A1   | 0 | 10503   | ATP13A1 | 0 | chr19 | 19625000  |
| 8491    | ATP13A1   | 0 | 10003   | ATP13A1 | 0 | chr19 | 19625500  |
| 54260   | PRRX2     | 0 | 2772    | PRRX2   | 0 | chr9  | 131522000 |
| 54760   | PRRX2     | 0 | 2272    | PRRX2   | 0 | chr9  | 131522500 |
| 52309   | SEPT9     | 0 | 128773  | SEPT9   | 0 | chr17 | 72879500  |
| 18031   | PPP2R3B   | 0 | 34627   | PPP2R3B | 0 | chrX  | 233000    |
| 18531   | PPP2R3B   | 0 | 34127   | PPP2R3B | 0 | chrX  | 233500    |
| -507185 | LOC400940 | 0 | 352901  | CMPK2   | 0 | chr2  | 6553000   |
| -507685 | LOC400940 | 0 | 352401  | CMPK2   | 0 | chr2  | 6553500   |
| 1804    | COX4I1    | 0 | 5608    | COX4I1  | 0 | chr16 | 84392500  |
| 2304    | COX4I1    | 0 | 5108    | COX4I1  | 0 | chr16 | 84393000  |
| 78106   | CELSR1    | 0 | 98231   | CELSR1  | 0 | chr22 | 45213500  |
| 78606   | CELSR1    | 0 | 97731   | CELSR1  | 0 | chr22 | 45214000  |
| 485     | THOC4     | 0 | 3258    | THOC4   | 0 | chr17 | 77439500  |
| 378399  | CUX1      | 0 | 54064   | CUX1    | 0 | chr7  | 101626000 |
| 10057   | SPEG      | 0 | 48598   | SPEG    | 0 | chr2  | 220018000 |
| -316    | AGXT2L1   | 0 | 50420   | COL25A1 | 0 | chr4  | 109904000 |
| 21284   | SS18L1    | 0 | 17461   | SS18L1  | 0 | chr20 | 60173500  |
| 21784   | SS18L1    | 0 | 16961   | SS18L1  | 0 | chr20 | 60174000  |
| -375945 | FAM43A    | 0 | 3301    | C3orf21 | 0 | chr3  | 196267000 |
| -376445 | FAM43A    | 0 | 2801    | C3orf21 | 0 | chr3  | 196267500 |
| -2160   | YDJC      | 0 | 585     | CCDC116 | 0 | chr22 | 20316500  |
| -2660   | YDJC      | 0 | 85      | CCDC116 | 0 | chr22 | 20317000  |
| 80316   | TTC7B     | 0 | 195514  | TTC7B   | 0 | chr14 | 90157000  |
| 80816   | TTC7B     | 0 | 195014  | TTC7B   | 0 | chr14 | 90157500  |
| 4294    | ATP2B2    | 0 | 177268  | ATP2B2  | 0 | chr3  | 10345000  |
| 4794    | ATP2B2    | 0 | 176768  | ATP2B2  | 0 | chr3  | 10345500  |
| 19038   | ZAP70     | 0 | 7255    | ZAP70   | 0 | chr2  | 97715500  |
| 37031   | PPP2R3B   | 0 | 15627   | PPP2R3B | 0 | chrY  | 252000    |
| 39469   | ASMTL     | 0 | 10344   | ASMTL   | 0 | chrX  | 1521500   |
| 39969   | ASMTL     | 0 | 9844    | ASMTL   | 0 | chrX  | 1522000   |
| 40469   | ASMTL     | 0 | 9344    | ASMTL   | 0 | chrX  | 1522500   |
| 6662    | DLL4      | 0 | 3029    | DLL4    | 0 | chr15 | 39015500  |
| 7162    | DLL4      | 0 | 2529    | DLL4    | 0 | chr15 | 39016000  |
| 2770    | LRRC27    | 0 | 46500   | LRRC27  | 0 | chr10 | 133998500 |
| 922     | ST8SIA5   | 0 | 77037   | ST8SIA5 | 0 | chr18 | 42514000  |
| -24527  | PEG3AS    | 0 | 2581    | MIMT1   | 0 | chr19 | 62041500  |
| -25027  | PEG3AS    | 0 | 2081    | MIMT1   | 0 | chr19 | 62042000  |
| 91332   | EXD3      | 0 | 25035   | EXD3    | 0 | chr9  | 139412500 |
| 91832   | EXD3      | 0 | 24535   | EXD3    | 0 | chr9  | 139413000 |
| -3683   | ZNF613    | 0 | 14904   | ZNF350  | 0 | chr19 | 57144500  |
| 278     | POLRMT    | 0 | 16068   | POLRMT  | 0 | chr19 | 568500    |
| 778     | POLRMT    | 0 | 15568   | POLRMT  | 0 | chr19 | 569000    |
| 6447    | EEF2      | 0 | 2961    | EEF2    | 0 | chr19 | 3933500   |
| -1535   | GLIS1     | 0 | 31975   | TMEM48  | 0 | chr1  | 53974000  |
| -2035   | GLIS1     | 0 | 31475   | TMEM48  | 0 | chr1  | 53974500  |

|         |              |   |        |          |   |       |           |
|---------|--------------|---|--------|----------|---|-------|-----------|
| -11847  | MYLK4        | 0 | 2664   | WRNIP1   | 0 | chr6  | 2708000   |
| -12347  | MYLK4        | 0 | 2164   | WRNIP1   | 0 | chr6  | 2708500   |
| 19188   | FRMD1        | 0 | 4188   | FRMD1    | 0 | chr6  | 168218500 |
| 19688   | FRMD1        | 0 | 3688   | FRMD1    | 0 | chr6  | 168219000 |
| 93087   | NCOR2        | 0 | 118102 | NCOR2    | 0 | chr12 | 123468000 |
| -75370  | FAM27L       | 0 | 2188   | FLJ36000 | 0 | chr17 | 21826000  |
| -75870  | FAM27L       | 0 | 1688   | FLJ36000 | 0 | chr17 | 21826500  |
| -76370  | FAM27L       | 0 | 1188   | FLJ36000 | 0 | chr17 | 21827000  |
| -76870  | FAM27L       | 0 | 688    | FLJ36000 | 0 | chr17 | 21827500  |
| -77370  | FAM27L       | 0 | 188    | FLJ36000 | 0 | chr17 | 21828000  |
| 6531    | SLC6A18      | 0 | 14304  | SLC6A18  | 0 | chr5  | 1285000   |
| 7031    | SLC6A18      | 0 | 13804  | SLC6A18  | 0 | chr5  | 1285500   |
| -6582   | ATP12A       | 0 | 45800  | RNF17    | 0 | chr13 | 24190500  |
| -7082   | ATP12A       | 0 | 45300  | RNF17    | 0 | chr13 | 24191000  |
| 6115    | ZNF843       | 0 | 1349   | ZNF843   | 0 | chr16 | 31360500  |
| 6615    | ZNF843       | 0 | 849    | ZNF843   | 0 | chr16 | 31361000  |
| 26353   | DOT1L        | 0 | 42077  | DOT1L    | 0 | chr19 | 2141500   |
| 26853   | DOT1L        | 0 | 41577  | DOT1L    | 0 | chr19 | 2142000   |
| 27353   | DOT1L        | 0 | 41077  | DOT1L    | 0 | chr19 | 2142500   |
| -984    | SNORD105B    | 0 | 696    | P2RY11   | 0 | chr19 | 10082500  |
| -1484   | SNORD105B    | 0 | 196    | P2RY11   | 0 | chr19 | 10083000  |
| 23928   | ADARB2       | 0 | 527718 | ADARB2   | 0 | chr10 | 1242000   |
| 24428   | ADARB2       | 0 | 527218 | ADARB2   | 0 | chr10 | 1242500   |
| -110957 | FLJ40292     | 0 | 2061   | CACNA1B  | 0 | chr9  | 139890000 |
| 171877  | KDM4B        | 0 | 12608  | KDM4B    | 0 | chr19 | 5092000   |
| 172377  | KDM4B        | 0 | 12108  | KDM4B    | 0 | chr19 | 5092500   |
| -108618 | TLN2         | 0 | 89390  | TPM1     | 0 | chr15 | 61032500  |
| -1916   | C16orf81     | 0 | 6163   | CDH15    | 0 | chr16 | 87759500  |
| -2416   | C16orf81     | 0 | 5663   | CDH15    | 0 | chr16 | 87760000  |
| 1833    | JMJD8        | 0 | 940    | JMJD8    | 0 | chr16 | 673500    |
| 110866  | LMF1         | 0 | 6485   | LMF1     | 0 | chr16 | 954500    |
| -3080   | TRPV1        | 0 | 12304  | SHPK     | 0 | chr17 | 3446000   |
| -3580   | TRPV1        | 0 | 11804  | SHPK     | 0 | chr17 | 3446500   |
| -4080   | TRPV1        | 0 | 11304  | SHPK     | 0 | chr17 | 3447000   |
| -4580   | TRPV1        | 0 | 10804  | SHPK     | 0 | chr17 | 3447500   |
| -5080   | TRPV1        | 0 | 10304  | SHPK     | 0 | chr17 | 3448000   |
| -627    | TRPA1        | 0 | 461179 | KCNB2    | 0 | chr8  | 73151000  |
| -72075  | MED13        | 0 | 127348 | TBC1D3P2 | 0 | chr17 | 57569500  |
| -1494   | LRRC34       | 0 | 7903   | LRRIQ4   | 0 | chr3  | 171014500 |
| 33416   | ARHGAP22     | 0 | 125644 | ARHGAP22 | 0 | chr10 | 49357500  |
| 33916   | ARHGAP22     | 0 | 125144 | ARHGAP22 | 0 | chr10 | 49358000  |
| -31     | SLC12A4      | 0 | 11566  | DPEP3    | 0 | chr16 | 66555500  |
| -99182  | SLC5A4       | 0 | 371    | RFPL3    | 0 | chr22 | 31080500  |
| -424    | NTN5         | 0 | 22539  | FUT2     | 0 | chr19 | 53868500  |
| -924    | NTN5         | 0 | 22039  | FUT2     | 0 | chr19 | 53869000  |
| -1424   | NTN5         | 0 | 21539  | FUT2     | 0 | chr19 | 53869500  |
| -1924   | NTN5         | 0 | 21039  | FUT2     | 0 | chr19 | 53870000  |
| 904     | NAP1L5       | 0 | 1046   | NAP1L5   | 0 | chr4  | 89837000  |
| 1404    | NAP1L5       | 0 | 546    | NAP1L5   | 0 | chr4  | 89837500  |
| 1904    | NAP1L5       | 0 | 46     | NAP1L5   | 0 | chr4  | 89838000  |
| -18301  | LCN1         | 0 | 1305   | OBP2A    | 0 | chr9  | 137576500 |
| -18801  | LCN1         | 0 | 805    | OBP2A    | 0 | chr9  | 137577000 |
| -52441  | LOC100130238 | 0 | 157229 | FBRSL1   | 0 | chr12 | 131420000 |
| -52941  | LOC100130238 | 0 | 156729 | FBRSL1   | 0 | chr12 | 131420500 |
| -564    | CD79B        | 0 | 5645   | SCN4A    | 0 | chr17 | 59364000  |
| -12918  | DENND3       | 0 | 2051   | SLC45A4  | 0 | chr8  | 142288000 |
| -13418  | DENND3       | 0 | 1551   | SLC45A4  | 0 | chr8  | 142288500 |
| 8957    | PLIN5        | 0 | 3708   | PLIN5    | 0 | chr19 | 4482500   |

|         |           |     |          |              |   |       |           |
|---------|-----------|-----|----------|--------------|---|-------|-----------|
| -361116 | BARX2     | 0   | 2450     | TMEM45B      | 0 | chr11 | 129188500 |
| -361616 | BARX2     | 0   | 1950     | TMEM45B      | 0 | chr11 | 129189000 |
| 13484   | ICAM1     | 0   | 2291     | ICAM1        | 0 | chr19 | 10256000  |
| 13984   | ICAM1     | 0   | 1791     | ICAM1        | 0 | chr19 | 10256500  |
| -28     | CKLF      | 0   | 294      | CMTM1        | 0 | chr16 | 65157500  |
| 150     | CMTM1     | 0   | 12539    | CMTM1        | 0 | chr16 | 65158000  |
| -671    | PSG6      | 0   | 5623     | PSG7         | 0 | chr19 | 48114500  |
| -1171   | PSG6      | 0   | 5123     | PSG7         | 0 | chr19 | 48115000  |
| -444    | RWDD2B    | 0   | 4808     | USP16        | 0 | chr21 | 29314000  |
| 6187    | NFATC1    | 0   | 122811   | NFATC1       | 0 | chr18 | 75267500  |
| 119685  | CACNB2    | 0   | 281194   | CACNB2       | 0 | chr10 | 18589500  |
| 126759  | TPO       | 0   | 2505     | TPO          | 0 | chr2  | 1523000   |
| 127259  | TPO       | 0   | 2005     | TPO          | 0 | chr2  | 1523500   |
| 84660   | AP2A2     | 0   | 1740     | AP2A2        | 0 | chr11 | 1000500   |
| 22492   | CARKD     | 0   | 1843     | CARKD        | 0 | chr13 | 110088500 |
| 22992   | CARKD     | 0   | 1343     | CARKD        | 0 | chr13 | 110089000 |
| 114205  | RASA3     | 0   | 36697    | RASA3        | 0 | chr13 | 113879500 |
| 114705  | RASA3     | 0   | 36197    | RASA3        | 0 | chr13 | 113880000 |
| 36918   | SHC2      | 0   | 7496     | SHC2         | 0 | chr19 | 404500    |
| 37418   | SHC2      | 0   | 6996     | SHC2         | 0 | chr19 | 405000    |
| -638    | CSNK1D    | 0   | 40534    | CD7          | 0 | chr17 | 77825500  |
| -1138   | CSNK1D    | 0   | 40034    | CD7          | 0 | chr17 | 77826000  |
| -1638   | CSNK1D    | 0   | 39534    | CD7          | 0 | chr17 | 77826500  |
| 60207   | RPH3AL    | 0   | 80076    | RPH3AL       | 0 | chr17 | 122500    |
| 60707   | RPH3AL    | 0   | 79576    | RPH3AL       | 0 | chr17 | 123000    |
| 20678   | MUM1      | 0   | 1430     | MUM1         | 0 | chr19 | 1328000   |
| 21178   | MUM1      | 0   | 930      | MUM1         | 0 | chr19 | 1328500   |
| -241404 | SMOC2     | 0   | 305799   | THBS2        | 0 | chr6  | 169052000 |
| -241904 | SMOC2     | 0   | 305299   | THBS2        | 0 | chr6  | 169052500 |
| -372885 | FAM92B    | 0   | 126029   | KIAA0182     | 0 | chr16 | 84076500  |
| -23     | NDUFB10   | 0   | 62       | RPS2         | 0 | chr16 | 1952000   |
| -32     | SNORA10   | 0   | 474      | SNORA64      | 0 | chr16 | 1952500   |
| -59026  | ZNF599    | 0   | 94646    | ZNF30        | 0 | chr19 | 40015000  |
| -59526  | ZNF599    | 0   | 94146    | ZNF30        | 0 | chr19 | 40015500  |
| -8033   | ZNF57     | 0   | 6715     | ZNF77        | 0 | chr19 | 2877500   |
| -8533   | ZNF57     | 0   | 6215     | ZNF77        | 0 | chr19 | 2878000   |
| 9974    | ATAD3B    | 0   | 14445    | ATAD3B       | 0 | chr1  | 1407000   |
| 10474   | ATAD3B    | 0   | 13945    | ATAD3B       | 0 | chr1  | 1407500   |
| ---     | ---       | --- | 410398   | LOC348021    | 0 | chr13 | 18070000  |
| 5466    | PLXNB2    | 0   | 14336    | PLXNB2       | 0 | chr22 | 49061000  |
| -1545   | KLF6      | 0   | 863377   | LOC100216001 | 0 | chr10 | 3819000   |
| 78369   | COL4A2    | 0   | 127374   | COL4A2       | 0 | chr13 | 109836000 |
| 1154    | LOC154449 | 0   | 7082     | LOC154449    | 0 | chr6  | 170406500 |
| 1654    | LOC154449 | 0   | 6582     | LOC154449    | 0 | chr6  | 170407000 |
| 62584   | FNDC1     | 0   | 40130    | FNDC1        | 0 | chr6  | 159573000 |
| 63084   | FNDC1     | 0   | 39630    | FNDC1        | 0 | chr6  | 159573500 |
| ---     | ---       | --- | 18349898 | LOC348021    | 0 | chr13 | 130500    |
| -422274 | ERICH1    | 0   | 343475   | DLGAP2       | 0 | chr8  | 1093500   |
| -278490 | DAZL      | 0   | 955      | PLCL2        | 0 | chr3  | 16900500  |
| 12324   | CPNE7     | 0   | 9154     | CPNE7        | 0 | chr16 | 88182000  |
| 19867   | P2RX1     | 0   | 209      | P2RX1        | 0 | chr17 | 3766500   |
| -855    | GNAS      | 0   | 69205    | TH1L         | 0 | chr20 | 56920500  |
| 37012   | PIGG      | 0   | 3320     | PIGG         | 0 | chr4  | 520000    |
| -1913   | CDC34     | 0   | 26       | GZMM         | 0 | chr19 | 495000    |
| 474     | GZMM      | 0   | 5419     | GZMM         | 0 | chr19 | 495500    |
| 22918   | SMTNL2    | 0   | 863      | SMTNL2       | 0 | chr17 | 4457500   |
| 7046    | NFKBIB    | 0   | 1874     | NFKBIB       | 0 | chr19 | 44089500  |
| 7546    | NFKBIB    | 0   | 1374     | NFKBIB       | 0 | chr19 | 44090000  |

|         |                  |   |        |                 |   |       |           |
|---------|------------------|---|--------|-----------------|---|-------|-----------|
| 2019    | H19              | 0 | 641    | H19             | 0 | chr11 | 1975000   |
| 1878    | C12orf12         | 0 | 1084   | C12orf12        | 0 | chr12 | 89872000  |
| 75      | GAS6             | 0 | 15419  | GAS6            | 0 | chr13 | 113575000 |
| 575     | GAS6             | 0 | 14919  | GAS6            | 0 | chr13 | 113575500 |
| 1075    | GAS6             | 0 | 14419  | GAS6            | 0 | chr13 | 113576000 |
| 1575    | GAS6             | 0 | 13919  | GAS6            | 0 | chr13 | 113576500 |
| 2075    | GAS6             | 0 | 13419  | GAS6            | 0 | chr13 | 113577000 |
| -64441  | LOC100130238     | 0 | 145229 | FBRSL1          | 0 | chr12 | 131432000 |
| -64941  | LOC100130238     | 0 | 144729 | FBRSL1          | 0 | chr12 | 131432500 |
| 172606  | CELSR1           | 0 | 3731   | CELSR1          | 0 | chr22 | 45308000  |
| 35281   | SLC47A2          | 0 | 3135   | SLC47A2         | 0 | chr17 | 19557500  |
| -5060   | SAG              | 0 | 2391   | DGKD            | 0 | chr2  | 233925500 |
| -5560   | SAG              | 0 | 1891   | DGKD            | 0 | chr2  | 233926000 |
| -6060   | SAG              | 0 | 1391   | DGKD            | 0 | chr2  | 233926500 |
| -6560   | SAG              | 0 | 891    | DGKD            | 0 | chr2  | 233927000 |
| 25867   | PTPN14           | 0 | 167765 | PTPN14          | 0 | chr1  | 212623500 |
| 26367   | PTPN14           | 0 | 167265 | PTPN14          | 0 | chr1  | 212624000 |
| -40640  | CLDN5            | 0 | 152    | LOC150185       | 0 | chr22 | 17933500  |
| 348     | LOC150185        | 0 | 362    | LOC150185       | 0 | chr22 | 17934000  |
| 11980   | SETD1B           | 0 | 15944  | SETD1B          | 0 | chr12 | 120739000 |
| 1472    | PITX2            | 0 | 18457  | PITX2           | 0 | chr4  | 111759500 |
| 172106  | CELSR1           | 0 | 4231   | CELSR1          | 0 | chr22 | 45307500  |
| 29714   | TERT             | 0 | 12162  | TERT            | 0 | chr5  | 1336000   |
| -30182  | C19orf21         | 0 | 2891   | PTBP1           | 0 | chr19 | 745500    |
| 42177   | HSPG2            | 0 | 72837  | HSPG2           | 0 | chr1  | 22063500  |
| -284997 | PITRM1           | 0 | 321238 | KLF6            | 0 | chr10 | 3490000   |
| -285497 | PITRM1           | 0 | 320738 | KLF6            | 0 | chr10 | 3490500   |
| 541     | CECR7            | 0 | 21682  | CECR7           | 0 | chr22 | 15898000  |
| -3464   | PRIC285          | 0 | 9898   | GMEB2           | 0 | chr20 | 61679500  |
| -3964   | PRIC285          | 0 | 9398   | GMEB2           | 0 | chr20 | 61680000  |
| -30712  | MLYCD            | 0 | 2172   | OSGIN1          | 0 | chr16 | 82538000  |
| 67962   | BANP             | 0 | 57925  | BANP            | 0 | chr16 | 86610500  |
| 254490  | PTPRN2           | 0 | 794243 | PTPRN2          | 0 | chr7  | 157279000 |
| 254990  | PTPRN2           | 0 | 793743 | PTPRN2          | 0 | chr7  | 157279500 |
| 41501   | JPH3             | 0 | 53762  | JPH3            | 0 | chr16 | 86235500  |
| 42001   | JPH3             | 0 | 53262  | JPH3            | 0 | chr16 | 86236000  |
| -140    | CXorf49,CXorf49E | 0 | 44864  | Xorf49,CXorf49B | 0 | chrX  | 70855000  |
| -640    | CXorf49,CXorf49E | 0 | 44364  | Xorf49,CXorf49B | 0 | chrX  | 70855500  |
| -147    | FAM48B2          | 0 | 49298  | FAM48B1         | 0 | chrX  | 24241500  |
| 16621   | CT45A4,CT45A2    | 0 | 8685   | CT45A4,CT45A2   | 0 | chrX  | 134710500 |
| 17121   | CT45A4,CT45A2    | 0 | 8185   | CT45A4,CT45A2   | 0 | chrX  | 134711000 |
| 347     | CT45A3           | 0 | 7685   | CT45A3          | 0 | chrX  | 134711500 |
| 574     | PCSK4            | 0 | 8407   | PCSK4           | 0 | chr19 | 1433000   |
| 1074    | PCSK4            | 0 | 7907   | PCSK4           | 0 | chr19 | 1433500   |
| -16175  | EXD2             | 0 | 1667   | GALNTL1         | 0 | chr14 | 68795000  |
| -16675  | EXD2             | 0 | 1167   | GALNTL1         | 0 | chr14 | 68795500  |
| 754     | RAX              | 0 | 5605   | RAX             | 0 | chr18 | 55086000  |
| -145565 | NBPF16           | 0 | 24409  | LOC645166       | 0 | chr1  | 147170500 |
| -163831 | C6orf155         | 0 | 302370 | RIMS1           | 0 | chr6  | 72351000  |
| -164331 | C6orf155         | 0 | 301870 | RIMS1           | 0 | chr6  | 72351500  |
| 198047  | MAD1L1           | 0 | 219109 | MAD1L1          | 0 | chr7  | 2020000   |
| 34792   | PHF21B           | 0 | 93973  | PHF21B          | 0 | chr22 | 43690500  |
| 35292   | PHF21B           | 0 | 93473  | PHF21B          | 0 | chr22 | 43691000  |
| 851     | FAM171A1         | 0 | 158564 | FAM171A1        | 0 | chr10 | 15294500  |
| 1351    | FAM171A1         | 0 | 158064 | FAM171A1        | 0 | chr10 | 15295000  |
| 5972    | CSNK1D           | 0 | 23362  | CSNK1D          | 0 | chr17 | 77801500  |
| 12149   | TEAD3            | 0 | 11339  | TEAD3           | 0 | chr6  | 35561500  |
| 12649   | TEAD3            | 0 | 10839  | TEAD3           | 0 | chr6  | 35562000  |



|          |              |   |        |              |   |       |           |
|----------|--------------|---|--------|--------------|---|-------|-----------|
| 97945    | ANO1         | 0 | 13299  | ANO1         | 0 | chr11 | 69700000  |
| 874      | NPBWR2       | 0 | 128    | NPBWR2       | 0 | chr20 | 62208500  |
| 315490   | PTPRN2       | 0 | 733243 | PTPRN2       | 0 | chr7  | 157340000 |
| 315990   | PTPRN2       | 0 | 732743 | PTPRN2       | 0 | chr7  | 157340500 |
| 90953    | TRIM2        | 0 | 43924  | TRIM2        | 0 | chr4  | 154436000 |
| 91453    | TRIM2        | 0 | 43424  | TRIM2        | 0 | chr4  | 154436500 |
| -168274  | ERICH1       | 0 | 597475 | DLGAP2       | 0 | chr8  | 839500    |
| -1283    | POUGF1       | 0 | 39274  | DAZAP2       | 0 | chr12 | 49879500  |
| -1783    | POUGF1       | 0 | 38774  | DAZAP2       | 0 | chr12 | 49880000  |
| 10816    | NFE2L1       | 0 | 2406   | NFE2L1       | 0 | chr17 | 43491500  |
| 21383    | NT5C1B       | 0 | 5319   | NT5C1B       | 0 | chr2  | 18629000  |
| 21883    | NT5C1B       | 0 | 4819   | NT5C1B       | 0 | chr2  | 18629500  |
| -75974   | GALNT9       | 0 | 29549  | LOC100130238 | 0 | chr12 | 131332500 |
| -490560  | ANKRD30BP2   | 0 | 1368   | POTED        | 0 | chr21 | 13903000  |
| -491060  | ANKRD30BP2   | 0 | 868    | POTED        | 0 | chr21 | 13903500  |
| -491560  | ANKRD30BP2   | 0 | 368    | POTED        | 0 | chr21 | 13904000  |
| 1403     | RIPK4        | 0 | 26318  | RIPK4        | 0 | chr21 | 42034000  |
| 1903     | RIPK4        | 0 | 25818  | RIPK4        | 0 | chr21 | 42034500  |
| 2403     | RIPK4        | 0 | 25318  | RIPK4        | 0 | chr21 | 42035000  |
| -643     | LOC100133050 | 0 | 146522 | FAM174A      | 0 | chr5  | 99752500  |
| -1143    | LOC100133050 | 0 | 146022 | FAM174A      | 0 | chr5  | 99753000  |
| -1643    | LOC100133050 | 0 | 145522 | FAM174A      | 0 | chr5  | 99753500  |
| 30510    | TSC2         | 0 | 10214  | TSC2         | 0 | chr16 | 2068500   |
| 31010    | TSC2         | 0 | 9714   | TSC2         | 0 | chr16 | 2069000   |
| -52113   | KRTAP10-12   | 0 | 18882  | UBE2G2       | 0 | chr21 | 44994500  |
| -3418    | IL3RA        | 0 | 44     | SLC25A6      | 0 | chrY  | 1465000   |
| 956      | SLC25A6      | 0 | 4998   | SLC25A6      | 0 | chrY  | 1466000   |
| -1015    | LMF1         | 0 | 9808   | SOX8         | 0 | chr16 | 962000    |
| 10316    | NFE2L1       | 0 | 2906   | NFE2L1       | 0 | chr17 | 43491000  |
| 395      | OLFML2B      | 0 | 40268  | OLFML2B      | 0 | chr1  | 160220000 |
| 895      | OLFML2B      | 0 | 39768  | OLFML2B      | 0 | chr1  | 160220500 |
| 43215    | C18orf1      | 0 | 390753 | C18orf1      | 0 | chr18 | 13252000  |
| 43715    | C18orf1      | 0 | 390253 | C18orf1      | 0 | chr18 | 13252500  |
| 44215    | C18orf1      | 0 | 389753 | C18orf1      | 0 | chr18 | 13253000  |
| 1340     | PHYHIP       | 0 | 11296  | PHYHIP       | 0 | chr8  | 22134500  |
| 1840     | PHYHIP       | 0 | 10796  | PHYHIP       | 0 | chr8  | 22135000  |
| 25386    | ABCG5        | 0 | 962    | ABCG5        | 0 | chr2  | 43918500  |
| 11432    | CNKSR1       | 0 | 962    | CNKSR1       | 0 | chr1  | 26388000  |
| 9593     | NR2E1        | 0 | 13204  | NR2E1        | 0 | chr6  | 108603500 |
| 10093    | NR2E1        | 0 | 12704  | NR2E1        | 0 | chr6  | 108604000 |
| 407      | CORO1B       | 0 | 5059   | CORO1B       | 0 | chr11 | 66962500  |
| 15444    | LDLR         | 0 | 29005  | LDLR         | 0 | chr19 | 11076500  |
| 15944    | LDLR         | 0 | 28505  | LDLR         | 0 | chr19 | 11077000  |
| -50885   | FAM92B       | 0 | 448029 | KIAA0182     | 0 | chr16 | 83754500  |
| 200028   | COL5A1       | 0 | 3009   | COL5A1       | 0 | chr9  | 136873500 |
| 200528   | COL5A1       | 0 | 2509   | COL5A1       | 0 | chr9  | 136874000 |
| 26201    | SLC27A1      | 0 | 9477   | SLC27A1      | 0 | chr19 | 17468500  |
| 26701    | SLC27A1      | 0 | 8977   | SLC27A1      | 0 | chr19 | 17469000  |
| 14052    | TNRC18       | 0 | 102703 | TNRC18       | 0 | chr7  | 5327000   |
| -853113  | LOC730811    | 0 | 8748   | TSSC1        | 0 | chr2  | 3163000   |
| -853613  | LOC730811    | 0 | 8248   | TSSC1        | 0 | chr2  | 3163500   |
| -22525   | B3GNTL1      | 0 | 5355   | METRNL       | 0 | chr17 | 78625500  |
| -23025   | B3GNTL1      | 0 | 4855   | METRNL       | 0 | chr17 | 78626000  |
| -1035112 | TBC1D22A     | 0 | 280451 | FAM19A5      | 0 | chr22 | 46983500  |
| -1035612 | TBC1D22A     | 0 | 279951 | FAM19A5      | 0 | chr22 | 46984000  |
| 18872    | SPPL2B       | 0 | 7600   | SPPL2B       | 0 | chr19 | 2298500   |
| -671280  | TP53TG3      | 0 | 417802 | UBE2MP1      | 0 | chr16 | 33843500  |
| -671780  | TP53TG3      | 0 | 417302 | UBE2MP1      | 0 | chr16 | 33844000  |

|          |         |     |         |           |   |       |           |
|----------|---------|-----|---------|-----------|---|-------|-----------|
| 1723     | PHB2    | 0   | 3652    | PHB2      | 0 | chr12 | 6946500   |
| 67845    | MCF2L   | 0   | 51363   | MCF2L     | 0 | chr13 | 112749500 |
| 68345    | MCF2L   | 0   | 50863   | MCF2L     | 0 | chr13 | 112750000 |
| -1460    | SSR1    | 0   | 11885   | CAGE1     | 0 | chr6  | 7260000   |
| -1960    | SSR1    | 0   | 11385   | CAGE1     | 0 | chr6  | 7260500   |
| -11364   | OBP2A   | 0   | 424     | PAEP      | 0 | chr9  | 137593000 |
| 76       | PAEP    | 0   | 4943    | PAEP      | 0 | chr9  | 137593500 |
| 14005    | KCTD5   | 0   | 12530   | KCTD5     | 0 | chr16 | 2686500   |
| 14505    | KCTD5   | 0   | 12030   | KCTD5     | 0 | chr16 | 2687000   |
| -62391   | EIF2AK3 | 0   | 1790    | RPIA      | 0 | chr2  | 88770500  |
| -126075  | BANP    | 0   | 226879  | ZNF469    | 0 | chr16 | 86794500  |
| -126575  | BANP    | 0   | 226379  | ZNF469    | 0 | chr16 | 86795000  |
| 11850    | DNMT3L  | 0   | 4027    | DNMT3L    | 0 | chr21 | 44502500  |
| 621047   | CDH4    | 0   | 63694   | CDH4      | 0 | chr20 | 59882000  |
| 621547   | CDH4    | 0   | 63194   | CDH4      | 0 | chr20 | 59882500  |
| -8077    | ABCG1   | 0   | 6731    | TFF3      | 0 | chr21 | 42598500  |
| -8577    | ABCG1   | 0   | 6231    | TFF3      | 0 | chr21 | 42599000  |
| -321     | KCNJ14  | 0   | 2776    | CYTH2     | 0 | chr19 | 53661500  |
| -821     | KCNJ14  | 0   | 2276    | CYTH2     | 0 | chr19 | 53662000  |
| 1296     | ZNF238  | 0   | 2903    | ZNF238    | 0 | chr1  | 242284500 |
| 1796     | ZNF238  | 0   | 2403    | ZNF238    | 0 | chr1  | 242285000 |
| 20712    | MVP     | 0   | 6842    | MVP       | 0 | chr16 | 29760000  |
| 21212    | MVP     | 0   | 6342    | MVP       | 0 | chr16 | 29760500  |
| 1378     | CHTF18  | 0   | 8075    | CHTF18    | 0 | chr16 | 780000    |
| 1878     | CHTF18  | 0   | 7575    | CHTF18    | 0 | chr16 | 780500    |
| 18527    | ELL     | 0   | 60937   | ELL       | 0 | chr19 | 18433000  |
| 19027    | ELL     | 0   | 60437   | ELL       | 0 | chr19 | 18433500  |
| 18031    | PPP2R3B | 0   | 34627   | PPP2R3B   | 0 | chrY  | 233000    |
| 18531    | PPP2R3B | 0   | 34127   | PPP2R3B   | 0 | chrY  | 233500    |
| -127648  | FGG     | 0   | 3612    | LRAT      | 0 | chr4  | 155881000 |
| 5569     | CUL4A   | 0   | 49893   | CUL4A     | 0 | chr13 | 112917500 |
| 6069     | CUL4A   | 0   | 49393   | CUL4A     | 0 | chr13 | 112918000 |
| 14055    | TSPAN4  | 0   | 8616    | TSPAN4    | 0 | chr11 | 848500    |
| ---      | ---     | --- | 8333113 | TPTE      | 0 | chr21 | 1595500   |
| ---      | ---     | --- | 8332613 | TPTE      | 0 | chr21 | 1596000   |
| -1264483 | IRX1    | 0   | 168471  | LOC340094 | 0 | chr5  | 4919000   |
| -1264983 | IRX1    | 0   | 167971  | LOC340094 | 0 | chr5  | 4919500   |
| 1089     | SBK2    | 0   | 5473    | SBK2      | 0 | chr19 | 60734000  |
| 6966     | PLXNB2  | 0   | 12836   | PLXNB2    | 0 | chr22 | 49062500  |
| 7466     | PLXNB2  | 0   | 12336   | PLXNB2    | 0 | chr22 | 49063000  |
| 7966     | PLXNB2  | 0   | 11836   | PLXNB2    | 0 | chr22 | 49063500  |
| 225212   | KIF5C   | 0   | 17019   | KIF5C     | 0 | chr2  | 149574500 |
| 225712   | KIF5C   | 0   | 16519   | KIF5C     | 0 | chr2  | 149575000 |
| 135784   | DLGAP4  | 0   | 96954   | DLGAP4    | 0 | chr20 | 34493500  |
| 15510    | TSC2    | 0   | 25214   | TSC2      | 0 | chr16 | 2053500   |
| 16010    | TSC2    | 0   | 24714   | TSC2      | 0 | chr16 | 2054000   |
| 16510    | TSC2    | 0   | 24214   | TSC2      | 0 | chr16 | 2054500   |
| 4171     | KLHL17  | 0   | 958     | KLHL17    | 0 | chr1  | 890000    |
| 4671     | KLHL17  | 0   | 458     | KLHL17    | 0 | chr1  | 890500    |
| -42      | KLHL17  | 0   | 739     | PLEKHN1   | 0 | chr1  | 891000    |
| -125120  | IRX4    | 0   | 738280  | IRX2      | 0 | chr5  | 2061000   |
| -125620  | IRX4    | 0   | 737780  | IRX2      | 0 | chr5  | 2061500   |
| 20171    | PGS1    | 0   | 25734   | PGS1      | 0 | chr17 | 73906500  |
| 20671    | PGS1    | 0   | 25234   | PGS1      | 0 | chr17 | 73907000  |
| -247     | SLC6A12 | 0   | 7051    | SLC6A13   | 0 | chr12 | 193000    |
| 1775     | PNPLA7  | 0   | 88807   | PNPLA7    | 0 | chr9  | 139476000 |
| 212422   | GALNT2  | 0   | 2498    | GALNT2    | 0 | chr1  | 228482000 |
| 212922   | GALNT2  | 0   | 1998    | GALNT2    | 0 | chr1  | 228482500 |

|          |                  |   |         |                 |   |       |           |
|----------|------------------|---|---------|-----------------|---|-------|-----------|
| 15794    | XRCC3            | 0 | 2076    | XRCC3           | 0 | chr14 | 103249500 |
| 8180     | RNF213           | 0 | 48173   | RNF213          | 0 | chr17 | 75936500  |
| 561      | PRAM1            | 0 | 11995   | PRAM1           | 0 | chr19 | 8461500   |
| 6213     | TUBA3E           | 0 | 504     | TUBA3E          | 0 | chr2  | 130672000 |
| 6713     | TUBA3E           | 0 | 4       | TUBA3E          | 0 | chr2  | 130672500 |
| -2862207 | C4orf33          | 0 | 1174419 | PCDH10          | 0 | chr4  | 133115500 |
| -2862707 | C4orf33          | 0 | 1173919 | PCDH10          | 0 | chr4  | 133116000 |
| -8095    | SPATA5L1         | 0 | 1054    | C15orf48        | 0 | chr15 | 43509000  |
| 1019     | H19              | 0 | 1641    | H19             | 0 | chr11 | 1974000   |
| 89037    | PCNT             | 0 | 32610   | PCNT            | 0 | chr21 | 46657500  |
| 12422    | PDZD7            | 0 | 1369    | PDZD7           | 0 | chr10 | 102779500 |
| 12922    | PDZD7            | 0 | 869     | PDZD7           | 0 | chr10 | 102780000 |
| 9470     | NCRNA00111       | 0 | 8565    | NCRNA00111      | 0 | chr21 | 41982000  |
| 9970     | NCRNA00111       | 0 | 8065    | NCRNA00111      | 0 | chr21 | 41982500  |
| 4455     | PRSSL1           | 0 | 5461    | PRSSL1          | 0 | chr19 | 641000    |
| 4955     | PRSSL1           | 0 | 4961    | PRSSL1          | 0 | chr19 | 641500    |
| 5455     | PRSSL1           | 0 | 4461    | PRSSL1          | 0 | chr19 | 642000    |
| 4941     | USP36            | 0 | 39064   | USP36           | 0 | chr17 | 74309500  |
| 5441     | USP36            | 0 | 38564   | USP36           | 0 | chr17 | 74310000  |
| -1845    | PSORS1C3         | 0 | 18015   | HCG27           | 0 | chr6  | 31255500  |
| 92995    | CELF4            | 0 | 229998  | CELF4           | 0 | chr18 | 33170000  |
| 31407    | BEND7            | 0 | 30482   | BEND7           | 0 | chr10 | 13554500  |
| 31907    | BEND7            | 0 | 29982   | BEND7           | 0 | chr10 | 13555000  |
| 32407    | BEND7            | 0 | 29482   | BEND7           | 0 | chr10 | 13555500  |
| 344897   | PRDM16           | 0 | 24545   | PRDM16          | 0 | chr1  | 3320500   |
| 345397   | PRDM16           | 0 | 24045   | PRDM16          | 0 | chr1  | 3321000   |
| -643     | PUS1             | 0 | 5460    | EP400           | 0 | chr12 | 130995000 |
| 395      | GAMT             | 0 | 2552    | GAMT            | 0 | chr19 | 1350000   |
| 895      | GAMT             | 0 | 2052    | GAMT            | 0 | chr19 | 1350500   |
| -39      | PRSSL1           | 0 | 13452   | PALM            | 0 | chr19 | 646500    |
| -539     | PRSSL1           | 0 | 12952   | PALM            | 0 | chr19 | 647000    |
| 39469    | ASMTL            | 0 | 10344   | ASMTL           | 0 | chrY  | 1521500   |
| 72869    | DIP2C            | 0 | 342608  | DIP2C           | 0 | chr10 | 383000    |
| 73869    | DIP2C            | 0 | 341608  | DIP2C           | 0 | chr10 | 384000    |
| -2140    | CXorf49,CXorf49E | 0 | 42864   | Xorf49,CXorf49B | 0 | chrX  | 70857000  |
| -17      | ODF3L2           | 0 | 21489   | MADCAM1         | 0 | chr19 | 426000    |
| -517     | ODF3L2           | 0 | 20989   | MADCAM1         | 0 | chr19 | 426500    |
| 20188    | FRMD1            | 0 | 3188    | FRMD1           | 0 | chr6  | 168219500 |
| 311      | EIF3G            | 0 | 4599    | EIF3G           | 0 | chr19 | 10087000  |
| 811      | EIF3G            | 0 | 4099    | EIF3G           | 0 | chr19 | 10087500  |
| 705490   | PTPRN2           | 0 | 343243  | PTPRN2          | 0 | chr7  | 157730000 |
| -60892   | C10orf108        | 0 | 83483   | LARP4B          | 0 | chr10 | 762000    |
| 66639    | TEKT5            | 0 | 803     | TEKT5           | 0 | chr16 | 10695500  |
| 4730     | ZNF629           | 0 | 4024    | ZNF629          | 0 | chr16 | 30702000  |
| 3083     | TUBA3C           | 0 | 4936    | TUBA3C          | 0 | chr13 | 18649000  |
| 199047   | MAD1L1           | 0 | 218109  | MAD1L1          | 0 | chr7  | 2021000   |
| -1371    | TMEM80           | 0 | 619     | EPS8L2          | 0 | chr11 | 695500    |
| 331869   | DIP2C            | 0 | 83608   | DIP2C           | 0 | chr10 | 642000    |
| 332369   | DIP2C            | 0 | 83108   | DIP2C           | 0 | chr10 | 642500    |
| 20462    | ADCK5            | 0 | 261     | ADCK5           | 0 | chr8  | 145589000 |
| 247      | CPSF1            | 0 | 16041   | CPSF1           | 0 | chr8  | 145589500 |
| 747      | CPSF1            | 0 | 15541   | CPSF1           | 0 | chr8  | 145590000 |
| 4426     | MIER2            | 0 | 34791   | MIER2           | 0 | chr19 | 261000    |
| 4926     | MIER2            | 0 | 34291   | MIER2           | 0 | chr19 | 261500    |
| 8761     | AMZ2             | 0 | 400     | AMZ2            | 0 | chr17 | 63764500  |
| -100     | AMZ2             | 0 | 1917    | ARSG            | 0 | chr17 | 63765000  |
| -100393  | TPTE2P1          | 0 | 27275   | PABPC3          | 0 | chr13 | 24541000  |
| 13766    | WDR5             | 0 | 6415    | WDR5            | 0 | chr9  | 136008500 |

|         |           |   |         |               |   |       |           |
|---------|-----------|---|---------|---------------|---|-------|-----------|
| -28303  | RASA3     | 0 | 73963   | CDC16         | 0 | chr13 | 113944500 |
| -28803  | RASA3     | 0 | 73463   | CDC16         | 0 | chr13 | 113945000 |
| 6379    | OGFR      | 0 | 2797    | OGFR          | 0 | chr20 | 60913000  |
| 333     | JMJD8     | 0 | 2440    | JMJD8         | 0 | chr16 | 672000    |
| 337990  | PTPRN2    | 0 | 710743  | PTPRN2        | 0 | chr7  | 157362500 |
| 338490  | PTPRN2    | 0 | 710243  | PTPRN2        | 0 | chr7  | 157363000 |
| -625    | SCMH1     | 0 | 236035  | EDN2          | 0 | chr1  | 41481000  |
| 110805  | CSMD2     | 0 | 541030  | CSMD2         | 0 | chr1  | 33863000  |
| 111305  | CSMD2     | 0 | 540530  | CSMD2         | 0 | chr1  | 33863500  |
| 3300    | FAM109B   | 0 | 1888    | FAM109B       | 0 | chr22 | 40803500  |
| 29242   | SLC7A9    | 0 | 10023   | SLC7A9        | 0 | chr19 | 38042500  |
| 3455    | SYT3      | 0 | 12614   | SYT3          | 0 | chr19 | 55820500  |
| -32743  | GADD45B   | 0 | 217     | GNG7          | 0 | chr19 | 2462000   |
| 283     | GNG7      | 0 | 191246  | GNG7          | 0 | chr19 | 2462500   |
| 588     | GAL3ST2   | 0 | 26875   | GAL3ST2       | 0 | chr2  | 242365500 |
| 10615   | LOC652276 | 0 | 16496   | LOC652276     | 0 | chr16 | 2604000   |
| 11115   | LOC652276 | 0 | 15996   | LOC652276     | 0 | chr16 | 2604500   |
| 63584   | FNDC1     | 0 | 39130   | FNDC1         | 0 | chr6  | 159574000 |
| 27889   | KIAA1751  | 0 | 22636   | KIAA1751      | 0 | chr1  | 1902500   |
| 6879    | OGFR      | 0 | 2297    | OGFR          | 0 | chr20 | 60913500  |
| -131624 | FLJ35776  | 0 | 1414671 | LOC642597     | 0 | chr18 | 3719000   |
| 14259   | SLCO4A1   | 0 | 15592   | SLCO4A1       | 0 | chr20 | 60758500  |
| 14759   | SLCO4A1   | 0 | 15092   | SLCO4A1       | 0 | chr20 | 60759000  |
| 66867   | PTPRF     | 0 | 25930   | PTPRF         | 0 | chr1  | 43836000  |
| 2526    | RPUSD1    | 0 | 884     | RPUSD1        | 0 | chr16 | 777500    |
| -155793 | ZNF716    | 0 | 4696104 | LOC643955     | 0 | chr7  | 57693000  |
| -156293 | ZNF716    | 0 | 4695604 | LOC643955     | 0 | chr7  | 57693500  |
| -1772   | C19orf25  | 0 | 426     | PCSK4         | 0 | chr19 | 1432000   |
| 74      | PCSK4     | 0 | 8907    | PCSK4         | 0 | chr19 | 1432500   |
| 8369    | GDPD3     | 0 | 379     | GDPD3         | 0 | chr16 | 30032000  |
| 5669    | ZNF526    | 0 | 2193    | ZNF526        | 0 | chr19 | 47422000  |
| 8083    | ATAD3A    | 0 | 14427   | ATAD3A        | 0 | chr1  | 1445500   |
| -102080 | RPS17     | 0 | 106827  | Q2P2,UBE2Q2P3 | 0 | chr15 | 80714000  |
| -166872 | ZNF267    | 0 | 67109   | HERC2P4       | 0 | chr16 | 32003000  |
| -167372 | ZNF267    | 0 | 66609   | HERC2P4       | 0 | chr16 | 32003500  |
| -167872 | ZNF267    | 0 | 66109   | HERC2P4       | 0 | chr16 | 32004000  |
| 664     | C6orf81   | 0 | 11163   | C6orf81       | 0 | chr6  | 35813500  |
| 54      | FUT7      | 0 | 2613    | FUT7          | 0 | chr9  | 139044500 |
| 554     | FUT7      | 0 | 2113    | FUT7          | 0 | chr9  | 139045000 |
| 24469   | ASMTL     | 0 | 25344   | ASMTL         | 0 | chrX  | 1506500   |
| 1949    | FAM20C    | 0 | 14059   | FAM20C        | 0 | chr7  | 290000    |
| 2449    | FAM20C    | 0 | 13559   | FAM20C        | 0 | chr7  | 290500    |
| 2949    | FAM20C    | 0 | 13059   | FAM20C        | 0 | chr7  | 291000    |
| -468251 | OR4N3P    | 0 | 835     | TUBGCP5       | 0 | chr15 | 20384000  |
| -84604  | IRX5      | 0 | 305471  | IRX6          | 0 | chr16 | 53610500  |
| 86260   | CLIP2     | 0 | 30209   | CLIP2         | 0 | chr7  | 73428000  |
| 1005    | LOC92659  | 0 | 1919    | LOC92659      | 0 | chr17 | 77480000  |
| 2189    | TPRX1     | 0 | 173     | TPRX1         | 0 | chr19 | 52998500  |
| -327    | TPRX1     | 0 | 17910   | CRX           | 0 | chr19 | 52999000  |
| 81830   | DMBT1     | 0 | 1242    | DMBT1         | 0 | chr10 | 124392000 |
| 82330   | DMBT1     | 0 | 742     | DMBT1         | 0 | chr10 | 124392500 |
| -15214  | LOC407835 | 0 | 1447    | TSPAN33       | 0 | chr7  | 128570500 |
| -26088  | TNFRSF19  | 0 | 34827   | MIPEP         | 0 | chr13 | 23167500  |
| -26588  | TNFRSF19  | 0 | 34327   | MIPEP         | 0 | chr13 | 23168000  |
| 3605    | ZSCAN10   | 0 | 362     | ZSCAN10       | 0 | chr16 | 3082500   |
| -91872  | BTNL9     | 0 | 1548    | OR2V2         | 0 | chr5  | 180513000 |
| -92372  | BTNL9     | 0 | 1048    | OR2V2         | 0 | chr5  | 180513500 |
| -5577   | DYNLRB1   | 0 | 352     | MAP1LC3A      | 0 | chr20 | 32598000  |

|         |           |   |        |            |   |       |           |
|---------|-----------|---|--------|------------|---|-------|-----------|
| 173606  | CELSR1    | 0 | 2731   | CELSR1     | 0 | chr22 | 45309000  |
| 174106  | CELSR1    | 0 | 2231   | CELSR1     | 0 | chr22 | 45309500  |
| 12527   | MUC5AC    | 0 | 100302 | MUC5AC     | 0 | chr11 | 1145000   |
| 13027   | MUC5AC    | 0 | 99802  | MUC5AC     | 0 | chr11 | 1145500   |
| -305097 | ADAM6     | 0 | 194999 | NCRNA00221 | 0 | chr14 | 105814500 |
| -1589   | SNORD105  | 0 | 424    | SNORD105B  | 0 | chr19 | 10081000  |
| 126     | WBP2      | 0 | 9596   | WBP2       | 0 | chr17 | 71353500  |
| 626     | WBP2      | 0 | 9096   | WBP2       | 0 | chr17 | 71354000  |
| 9626    | NCLN      | 0 | 14073  | NCLN       | 0 | chr19 | 3146500   |
| 10126   | NCLN      | 0 | 13573  | NCLN       | 0 | chr19 | 3147000   |
| 1310    | GGTLC1    | 0 | 2416   | GGTLC1     | 0 | chr20 | 23915000  |
| -2023   | GPER      | 0 | 57069  | ZFAND2A    | 0 | chr7  | 1102000   |
| -240577 | ---       | 0 | 102767 | ZNF479     | 0 | chr7  | 57088500  |
| 30854   | BRI3BP    | 0 | 1302   | BRI3BP     | 0 | chr12 | 124075000 |
| 31354   | BRI3BP    | 0 | 802    | BRI3BP     | 0 | chr12 | 124075500 |
| 26266   | FAM182B   | 0 | 5427   | FAM182B    | 0 | chr20 | 25724500  |
| 26766   | FAM182B   | 0 | 4927   | FAM182B    | 0 | chr20 | 25725000  |
| 2319    | HRNR      | 0 | 9793   | HRNR       | 0 | chr1  | 150453500 |
| 2819    | HRNR      | 0 | 9293   | HRNR       | 0 | chr1  | 150454000 |
| 29057   | NOTCH3    | 0 | 12292  | NOTCH3     | 0 | chr19 | 15160500  |
| 29557   | NOTCH3    | 0 | 11792  | NOTCH3     | 0 | chr19 | 15161000  |
| 4583    | MICAL3    | 0 | 232325 | MICAL3     | 0 | chr22 | 16655000  |
| 25093   | SPIRE2    | 0 | 17728  | SPIRE2     | 0 | chr16 | 88447500  |
| -2826   | C4B,C4A   | 0 | 60     | CYP21A2    | 0 | chr6  | 32114000  |
| 440     | CYP21A2   | 0 | 2898   | CYP21A2    | 0 | chr6  | 32114500  |
| 25372   | SPPL2B    | 0 | 1100   | SPPL2B     | 0 | chr19 | 2305000   |
| 25872   | SPPL2B    | 0 | 600    | SPPL2B     | 0 | chr19 | 2305500   |
| 345     | MCF2L     | 0 | 118863 | MCF2L      | 0 | chr13 | 112682000 |
| 4708    | RBM12     | 0 | 11252  | RBM12      | 0 | chr20 | 33705000  |
| 37031   | PPP2R3B   | 0 | 15627  | PPP2R3B    | 0 | chrX  | 252000    |
| 102499  | KAZ       | 0 | 19738  | KAZ        | 0 | chr1  | 15247500  |
| 102999  | KAZ       | 0 | 19238  | KAZ        | 0 | chr1  | 15248000  |
| -25931  | LSP1      | 0 | 1374   | TNNT3      | 0 | chr11 | 1896000   |
| -22690  | TET3      | 0 | 4535   | BOLA3      | 0 | chr2  | 74211500  |
| 8130    | KLHL21    | 0 | 4016   | KLHL21     | 0 | chr1  | 6581500   |
| 8630    | KLHL21    | 0 | 3516   | KLHL21     | 0 | chr1  | 6582000   |
| 20296   | BRSK2     | 0 | 51904  | BRSK2      | 0 | chr11 | 1388000   |
| 22232   | PRKCZ     | 0 | 112694 | PRKCZ      | 0 | chr1  | 1994000   |
| 1835    | CLSTN1    | 0 | 93637  | CLSTN1     | 0 | chr1  | 9713500   |
| 2335    | CLSTN1    | 0 | 93137  | CLSTN1     | 0 | chr1  | 9714000   |
| -12123  | APH1B     | 0 | 2282   | CA12       | 0 | chr15 | 61400500  |
| -12623  | APH1B     | 0 | 1782   | CA12       | 0 | chr15 | 61401000  |
| 7132    | SEC16A    | 0 | 35828  | SEC16A     | 0 | chr9  | 138461500 |
| -31182  | C19orf21  | 0 | 1891   | PTBP1      | 0 | chr19 | 746500    |
| 16284   | GET4      | 0 | 3597   | GET4       | 0 | chr7  | 899000    |
| 16784   | GET4      | 0 | 3097   | GET4       | 0 | chr7  | 899500    |
| 1727    | TPSD1     | 0 | 495    | TPSD1      | 0 | chr16 | 1248000   |
| 182537  | PDE3A     | 0 | 129148 | PDE3A      | 0 | chr12 | 20596000  |
| 183037  | PDE3A     | 0 | 128648 | PDE3A      | 0 | chr12 | 20596500  |
| 183537  | PDE3A     | 0 | 128148 | PDE3A      | 0 | chr12 | 20597000  |
| 23235   | ASB2      | 0 | 20     | ASB2       | 0 | chr14 | 93493500  |
| 10418   | SHC2      | 0 | 33996  | SHC2       | 0 | chr19 | 378000    |
| -1549   | IL28B     | 0 | 21996  | IL28A      | 0 | chr19 | 44429000  |
| 61677   | HSPG2     | 0 | 53337  | HSPG2      | 0 | chr1  | 22083000  |
| 62677   | HSPG2     | 0 | 52337  | HSPG2      | 0 | chr1  | 22084000  |
| -281    | FOXO3B    | 0 | 48626  | TRIM16L    | 0 | chr17 | 18517500  |
| 23969   | ASMTL     | 0 | 25844  | ASMTL      | 0 | chrY  | 1506000   |
| -132478 | LOC284233 | 0 | 2955   | CXADRP3    | 0 | chr18 | 14465000  |

|         |           |   |        |          |   |       |           |
|---------|-----------|---|--------|----------|---|-------|-----------|
| -9491   | SNRPD3    | 0 | 1717   | GGT1     | 0 | chr22 | 23308000  |
| -291    | P2RX1     | 0 | 6917   | ATP2A3   | 0 | chr17 | 3767000   |
| 6092    | ZBTB4     | 0 | 14168  | ZBTB4    | 0 | chr17 | 7309500   |
| 6592    | ZBTB4     | 0 | 13668  | ZBTB4    | 0 | chr17 | 7310000   |
| -15060  | PKD1P1    | 0 | 736681 | XYLT1    | 0 | chr16 | 16367000  |
| 1306    | ALKBH4    | 0 | 7293   | ALKBH4   | 0 | chr7  | 101885000 |
| 1159    | PDZRN3    | 0 | 241262 | PDZRN3   | 0 | chr3  | 73515500  |
| 1659    | PDZRN3    | 0 | 240762 | PDZRN3   | 0 | chr3  | 73516000  |
| 12629   | CBS       | 0 | 10109  | CBS      | 0 | chr21 | 43359000  |
| 13129   | CBS       | 0 | 9609   | CBS      | 0 | chr21 | 43359500  |
| 1706    | YBX2      | 0 | 4600   | YBX2     | 0 | chr17 | 7134000   |
| 2206    | YBX2      | 0 | 4100   | YBX2     | 0 | chr17 | 7134500   |
| -55598  | FAM83H    | 0 | 1577   | SCRIB    | 0 | chr8  | 144943500 |
| 11316   | NFE2L1    | 0 | 1906   | NFE2L1   | 0 | chr17 | 43492000  |
| 30047   | MAD1L1    | 0 | 387109 | MAD1L1   | 0 | chr7  | 1852000   |
| 3462    | TBX2      | 0 | 6109   | TBX2     | 0 | chr17 | 56835500  |
| 3962    | TBX2      | 0 | 5609   | TBX2     | 0 | chr17 | 56836000  |
| 7680    | RNF213    | 0 | 48673  | RNF213   | 0 | chr17 | 75936000  |
| 725     | PRKACG    | 0 | 859    | PRKACG   | 0 | chr9  | 70818000  |
| 1225    | PRKACG    | 0 | 359    | PRKACG   | 0 | chr9  | 70818500  |
| 43969   | CROCC     | 0 | 7061   | CROCC    | 0 | chr1  | 17165000  |
| 44469   | CROCC     | 0 | 6561   | CROCC    | 0 | chr1  | 17165500  |
| 2372    | SPPL2B    | 0 | 24100  | SPPL2B   | 0 | chr19 | 2282000   |
| 21858   | GALNS     | 0 | 21375  | GALNS    | 0 | chr16 | 87429500  |
| 22358   | GALNS     | 0 | 20875  | GALNS    | 0 | chr16 | 87430000  |
| 37      | OR10Q1    | 0 | 923    | OR10Q1   | 0 | chr11 | 57752000  |
| 537     | OR10Q1    | 0 | 423    | OR10Q1   | 0 | chr11 | 57752500  |
| -87192  | CBX4      | 0 | 13413  | TBC1D16  | 0 | chr17 | 75515000  |
| -1581   | ZNF423    | 0 | 196689 | TMEM188  | 0 | chr16 | 48420000  |
| 6708    | GRK6      | 0 | 9456   | GRK6     | 0 | chr5  | 176793000 |
| 7208    | GRK6      | 0 | 8956   | GRK6     | 0 | chr5  | 176793500 |
| 53425   | USP42     | 0 | 3220   | USP42    | 0 | chr7  | 6164500   |
| 53925   | USP42     | 0 | 2720   | USP42    | 0 | chr7  | 6165000   |
| -520224 | MAP2K4    | 0 | 1931   | MYOCD    | 0 | chr17 | 12508000  |
| -8803   | PKD1P1    | 0 | 31682  | NOMO2    | 0 | chr16 | 18387000  |
| 41553   | CACNA1G   | 0 | 3832   | CACNA1G  | 0 | chr17 | 46035000  |
| 5423    | MGC2752   | 0 | 3574   | MGC2752  | 0 | chr19 | 63784000  |
| 5923    | MGC2752   | 0 | 3074   | MGC2752  | 0 | chr19 | 63784500  |
| 6423    | MGC2752   | 0 | 2574   | MGC2752  | 0 | chr19 | 63785000  |
| 1550    | ZBTB17    | 0 | 32714  | ZBTB17   | 0 | chr1  | 16142500  |
| 522     | LSP1      | 0 | 23069  | LSP1     | 0 | chr11 | 1847000   |
| 1022    | LSP1      | 0 | 22569  | LSP1     | 0 | chr11 | 1847500   |
| 5160    | PPP1R13B  | 0 | 108680 | PPP1R13B | 0 | chr14 | 103275000 |
| 24416   | TECTA     | 0 | 63725  | TECTA    | 0 | chr11 | 120503000 |
| 50385   | OCA2      | 0 | 294053 | OCA2     | 0 | chr15 | 25724000  |
| 79045   | FOXK1     | 0 | 10100  | FOXK1    | 0 | chr7  | 4767500   |
| -25391  | CBFA2T3   | 0 | 127254 | ACSF3    | 0 | chr16 | 87560500  |
| -26391  | CBFA2T3   | 0 | 126254 | ACSF3    | 0 | chr16 | 87561500  |
| 4590    | TNXB      | 0 | 63629  | TNXB     | 0 | chr6  | 32121500  |
| 4079    | ADRM1     | 0 | 1813   | ADRM1    | 0 | chr20 | 60315500  |
| 907     | CORO1B    | 0 | 4559   | CORO1B   | 0 | chr11 | 66963000  |
| 100475  | PLEKHA5   | 0 | 70598  | PLEKHA5  | 0 | chr12 | 19350000  |
| 5488    | ALDH4A1   | 0 | 25659  | ALDH4A1  | 0 | chr1  | 19076000  |
| 5988    | ALDH4A1   | 0 | 25159  | ALDH4A1  | 0 | chr1  | 19076500  |
| -854113 | LOC730811 | 0 | 7748   | TSSC1    | 0 | chr2  | 3164000   |
| 42677   | HSPG2     | 0 | 72337  | HSPG2    | 0 | chr1  | 22064000  |
| 4336    | SLC7A2    | 0 | 27352  | SLC7A2   | 0 | chr8  | 17445000  |
| 295     | SLC7A2    | 0 | 26852  | SLC7A2   | 0 | chr8  | 17445500  |

|          |              |   |         |          |   |       |           |
|----------|--------------|---|---------|----------|---|-------|-----------|
| 1837     | COX7A1       | 0 | 111     | COX7A1   | 0 | chr19 | 41335500  |
| 85214    | GABRB3       | 0 | 144344  | GABRB3   | 0 | chr15 | 24425000  |
| 85714    | GABRB3       | 0 | 143844  | GABRB3   | 0 | chr15 | 24425500  |
| 2061     | ABHD8        | 0 | 9282    | ABHD8    | 0 | chr19 | 17266000  |
| 15643    | PMEPA1       | 0 | 47447   | PMEPA1   | 0 | chr20 | 55672500  |
| 16143    | PMEPA1       | 0 | 46947   | PMEPA1   | 0 | chr20 | 55673000  |
| 67335    | UNC5A        | 0 | 3005    | UNC5A    | 0 | chr5  | 176237500 |
| 25894    | PON1         | 0 | 320     | PON1     | 0 | chr7  | 94791500  |
| -1389    | TH           | 0 | 95303   | ASCL2    | 0 | chr11 | 2151000   |
| -1748    | GSC          | 0 | 314317  | DICER1   | 0 | chr14 | 94308000  |
| -1841    | SLC26A9      | 0 | 139533  | FAM72A   | 0 | chr1  | 204166000 |
| 1280     | SMAD7        | 0 | 29579   | SMAD7    | 0 | chr18 | 44701500  |
| 1780     | SMAD7        | 0 | 29079   | SMAD7    | 0 | chr18 | 44702000  |
| 15917    | DAZAP1       | 0 | 12182   | DAZAP1   | 0 | chr19 | 1374500   |
| 16417    | DAZAP1       | 0 | 11682   | DAZAP1   | 0 | chr19 | 1375000   |
| 16917    | DAZAP1       | 0 | 11182   | DAZAP1   | 0 | chr19 | 1375500   |
| -36512   | TCP10        | 0 | 173569  | C6orf123 | 0 | chr6  | 167754500 |
| -37012   | TCP10        | 0 | 173069  | C6orf123 | 0 | chr6  | 167755000 |
| -44538   | LOC90834     | 0 | 29000   | ZBED4    | 0 | chr22 | 48604500  |
| 348      | DUS3L        | 0 | 5690    | DUS3L    | 0 | chr19 | 5736500   |
| 3153     | ASMT         | 0 | 44474   | ASMT     | 0 | chrY  | 1677500   |
| -8481    | CYP2D7P1     | 0 | 6962    | TCF20    | 0 | chr22 | 40879000  |
| -80168   | BHLHE23      | 0 | 8289    | HAR1B    | 0 | chr20 | 61189000  |
| -80668   | BHLHE23      | 0 | 7789    | HAR1B    | 0 | chr20 | 61189500  |
| 114703   | PCDH19       | 0 | 3927    | PCDH19   | 0 | chrX  | 99548000  |
| 1329     | TUBB4Q       | 0 | 1018    | TUBB4Q   | 0 | chr4  | 191142000 |
| 2329     | TUBB4Q       | 0 | 18      | TUBB4Q   | 0 | chr4  | 191143000 |
| -1588429 | TTY23B,TTY23 | 0 | 1335691 | TTY15    | 0 | chrY  | 11948000  |
| -1588929 | TTY23B,TTY23 | 0 | 1335191 | TTY15    | 0 | chrY  | 11948500  |
| 3752     | GPER         | 0 | 1977    | GPER     | 0 | chr7  | 1098000   |
| 4252     | GPER         | 0 | 1477    | GPER     | 0 | chr7  | 1098500   |
| 4752     | GPER         | 0 | 977     | GPER     | 0 | chr7  | 1099000   |
| 1489     | SHBG         | 0 | 3925    | SHBG     | 0 | chr17 | 7473500   |
| 956      | SLC25A6      | 0 | 4998    | SLC25A6  | 0 | chrX  | 1466000   |
| 364      | ENTPD8       | 0 | 6722    | ENTPD8   | 0 | chr9  | 139449000 |
| 864      | ENTPD8       | 0 | 6222    | ENTPD8   | 0 | chr9  | 139449500 |
| 12389    | KIAA1751     | 0 | 38136   | KIAA1751 | 0 | chr1  | 1887000   |
| 12889    | KIAA1751     | 0 | 37636   | KIAA1751 | 0 | chr1  | 1887500   |
| 7428     | PEG10        | 0 | 5942    | PEG10    | 0 | chr7  | 94131000  |
| 7928     | PEG10        | 0 | 5442    | PEG10    | 0 | chr7  | 94131500  |
| 8428     | PEG10        | 0 | 4942    | PEG10    | 0 | chr7  | 94132000  |
| 62971    | WDR60        | 0 | 26644   | WDR60    | 0 | chr7  | 158405000 |
| 63471    | WDR60        | 0 | 26144   | WDR60    | 0 | chr7  | 158405500 |
| 18443    | SPDEF        | 0 | 69      | SPDEF    | 0 | chr6  | 34632000  |
| 398      | PARVG        | 0 | 25867   | PARVG    | 0 | chr22 | 42908500  |
| 411      | PARVG        | 0 | 25367   | PARVG    | 0 | chr22 | 42909000  |
| 322      | EID3         | 0 | 1112    | EID3     | 0 | chr12 | 103222000 |
| -263221  | CECR1        | 0 | 2627    | CECR2    | 0 | chr22 | 16334000  |
| -263721  | CECR1        | 0 | 2127    | CECR2    | 0 | chr22 | 16334500  |
| -30280   | ARHGAP28     | 0 | 12885   | LAMA1    | 0 | chr18 | 6919000   |
| -30780   | ARHGAP28     | 0 | 12385   | LAMA1    | 0 | chr18 | 6919500   |
| -1941    | LOC100130238 | 0 | 207729  | FBRSL1   | 0 | chr12 | 131369500 |
| -2441    | LOC100130238 | 0 | 207229  | FBRSL1   | 0 | chr12 | 131370000 |
| 949      | GPS1         | 0 | 4635    | GPS1     | 0 | chr17 | 77604000  |
| 10255    | TUBB3        | 0 | 2506    | TUBB3    | 0 | chr16 | 88527500  |
| 10755    | TUBB3        | 0 | 2006    | TUBB3    | 0 | chr16 | 88528000  |
| 800      | ZNF689       | 0 | 6183    | ZNF689   | 0 | chr16 | 30523000  |
| -13060   | PKD1P1       | 0 | 738681  | XYLT1    | 0 | chr16 | 16365000  |

|         |              |   |        |              |   |       |           |
|---------|--------------|---|--------|--------------|---|-------|-----------|
| -13560  | PKD1P1       | 0 | 738181 | XYLT1        | 0 | chr16 | 16365500  |
| -14060  | PKD1P1       | 0 | 737681 | XYLT1        | 0 | chr16 | 16366000  |
| -14560  | PKD1P1       | 0 | 737181 | XYLT1        | 0 | chr16 | 16366500  |
| -16303  | RASA3        | 0 | 85963  | CDC16        | 0 | chr13 | 113932500 |
| -16803  | RASA3        | 0 | 85463  | CDC16        | 0 | chr13 | 113933000 |
| -218019 | IMPAD1       | 0 | 67655  | C8orf71      | 0 | chr8  | 58287000  |
| -218519 | IMPAD1       | 0 | 67155  | C8orf71      | 0 | chr8  | 58287500  |
| -6596   | D2HGDH       | 0 | 1412   | GAL3ST2      | 0 | chr2  | 242363500 |
| -7096   | D2HGDH       | 0 | 912    | GAL3ST2      | 0 | chr2  | 242364000 |
| -7596   | D2HGDH       | 0 | 412    | GAL3ST2      | 0 | chr2  | 242364500 |
| 26588   | SMAD3        | 0 | 30586  | SMAD3        | 0 | chr15 | 65244000  |
| 63338   | PPARA        | 0 | 29817  | PPARA        | 0 | chr22 | 44988500  |
| 63838   | PPARA        | 0 | 29317  | PPARA        | 0 | chr22 | 44989000  |
| -9300   | MLPH         | 0 | 1955   | PRLH         | 0 | chr2  | 238138000 |
| -9800   | MLPH         | 0 | 1455   | PRLH         | 0 | chr2  | 238138500 |
| 798     | PEPD         | 0 | 134141 | PEPD         | 0 | chr19 | 38570500  |
| -6502   | SLC25A6      | 0 | 1923   | ASMTLAS      | 0 | chrY  | 1477500   |
| 16780   | DGKZ         | 0 | 2180   | DGKZ         | 0 | chr11 | 46356500  |
| 40526   | AGAP1        | 0 | 590859 | AGAP1        | 0 | chr2  | 236108000 |
| 41026   | AGAP1        | 0 | 590359 | AGAP1        | 0 | chr2  | 236108500 |
| 7126    | TNNT3        | 0 | 12012  | TNNT3        | 0 | chr11 | 1904500   |
| 5784    | NOTCH1       | 0 | 45559  | NOTCH1       | 0 | chr9  | 138514500 |
| 6284    | NOTCH1       | 0 | 45059  | NOTCH1       | 0 | chr9  | 138515000 |
| 7251    | LOC100129637 | 0 | 291    | LOC100129637 | 0 | chr16 | 86296500  |
| 16723   | MAPK8IP1     | 0 | 4092   | MAPK8IP1     | 0 | chr11 | 45880500  |
| 17223   | MAPK8IP1     | 0 | 3592   | MAPK8IP1     | 0 | chr11 | 45881000  |
| -20070  | UVRAG        | 0 | 22017  | WNT11        | 0 | chr11 | 75553000  |
| 245     | LOC648691    | 0 | 7006   | LOC648691    | 0 | chr22 | 21232000  |
| 745     | LOC648691    | 0 | 6506   | LOC648691    | 0 | chr22 | 21232500  |
| -1523   | ACHE         | 0 | 117083 | MUC17        | 0 | chr7  | 100333000 |
| 10432   | CNKSRI       | 0 | 1962   | CNKSRI       | 0 | chr1  | 26387000  |
| 10272   | GAS6         | 0 | 2919   | GAS6         | 0 | chr13 | 113587500 |
| 126     | VENTXP1      | 0 | 2589   | VENTXP1      | 0 | chrX  | 26486500  |
| 5412    | FAM38A       | 0 | 15818  | FAM38A       | 0 | chr16 | 87314500  |
| 3714    | RAB35        | 0 | 17982  | RAB35        | 0 | chr12 | 119021000 |
| 4214    | RAB35        | 0 | 17482  | RAB35        | 0 | chr12 | 119021500 |
| -1036   | GRTP1        | 0 | 56760  | ADPRHL1      | 0 | chr13 | 113067500 |
| -1536   | GRTP1        | 0 | 56260  | ADPRHL1      | 0 | chr13 | 113068000 |
| 477     | HGFAC        | 0 | 7011   | HGFAC        | 0 | chr4  | 3414000   |
| 11090   | ASTE1        | 0 | 1836   | ASTE1        | 0 | chr3  | 132226500 |
| 68491   | ABR          | 0 | 115366 | ABR          | 0 | chr17 | 922000    |
| 152357  | ATP11A       | 0 | 44483  | ATP11A       | 0 | chr13 | 112545000 |
| 152857  | ATP11A       | 0 | 43983  | ATP11A       | 0 | chr13 | 112545500 |
| -82171  | F11          | 0 | 161802 | MTNR1A       | 0 | chr4  | 187530000 |
| -82671  | F11          | 0 | 161302 | MTNR1A       | 0 | chr4  | 187530500 |
| -3295   | GTPBP5       | 0 | 8911   | HRH3         | 0 | chr20 | 60214500  |
| -3795   | GTPBP5       | 0 | 8411   | HRH3         | 0 | chr20 | 60215000  |
| 4247    | CPSF1        | 0 | 12041  | CPSF1        | 0 | chr8  | 145593500 |
| 4747    | CPSF1        | 0 | 11541  | CPSF1        | 0 | chr8  | 145594000 |
| 57      | LOC126536    | 0 | 11772  | LOC126536    | 0 | chr19 | 15987500  |
| -101416 | SLC6A9       | 0 | 108    | KLF17        | 0 | chr1  | 44357000  |
| 1483    | LPPR3        | 0 | 7952   | LPPR3        | 0 | chr19 | 765000    |
| 1983    | LPPR3        | 0 | 7452   | LPPR3        | 0 | chr19 | 765500    |
| 2483    | LPPR3        | 0 | 6952   | LPPR3        | 0 | chr19 | 766000    |
| 10076   | NT5DC2       | 0 | 633    | NT5DC2       | 0 | chr3  | 52543500  |
| 10576   | NT5DC2       | 0 | 133    | NT5DC2       | 0 | chr3  | 52544000  |
| 44270   | MTA1         | 0 | 6602   | MTA1         | 0 | chr14 | 105001500 |
| 44770   | MTA1         | 0 | 6102   | MTA1         | 0 | chr14 | 105002000 |



|         |               |   |        |               |   |       |           |
|---------|---------------|---|--------|---------------|---|-------|-----------|
| -16473  | ARHGDI A      | 0 | 15     | THOC4         | 0 | chr17 | 77439000  |
| 70869   | DIP2C         | 0 | 344608 | DIP2C         | 0 | chr10 | 381000    |
| 12352   | C7orf50       | 0 | 128919 | C7orf50       | 0 | chr7  | 1015500   |
| 64271   | FBRSL1        | 0 | 30344  | FBRSL1        | 0 | chr12 | 131641500 |
| 64771   | FBRSL1        | 0 | 29844  | FBRSL1        | 0 | chr12 | 131642000 |
| 32935   | UHRF1         | 0 | 18665  | UHRF1         | 0 | chr19 | 4894500   |
| 33435   | UHRF1         | 0 | 18165  | UHRF1         | 0 | chr19 | 4895000   |
| -84106  | DNAJB6        | 0 | 37510  | PTPRN2        | 0 | chr7  | 156987000 |
| -84606  | DNAJB6        | 0 | 37010  | PTPRN2        | 0 | chr7  | 156987500 |
| -148    | TSPYL5        | 0 | 366082 | MTDH          | 0 | chr8  | 98359500  |
| -189304 | TRIM43        | 0 | 221525 | LOC729234     | 0 | chr2  | 95818500  |
| -189804 | TRIM43        | 0 | 221025 | LOC729234     | 0 | chr2  | 95819000  |
| 9591    | CECR5         | 0 | 18177  | CECR5         | 0 | chr22 | 16008000  |
| 10091   | CECR5         | 0 | 17677  | CECR5         | 0 | chr22 | 16008500  |
| -17809  | RREB1         | 0 | 11786  | SSR1          | 0 | chr6  | 7214500   |
| 896     | CSH2          | 0 | 821    | CSH2          | 0 | chr17 | 59304000  |
| 1396    | CSH2          | 0 | 321    | CSH2          | 0 | chr17 | 59304500  |
| -179    | CSH2          | 0 | 6303   | GH2           | 0 | chr17 | 59305000  |
| -67880  | LOC728613     | 0 | 96498  | MRPL36        | 0 | chr5  | 1755000   |
| -68380  | LOC728613     | 0 | 95998  | MRPL36        | 0 | chr5  | 1755500   |
| 164611  | ZNRF3         | 0 | 8975   | ZNRF3         | 0 | chr22 | 27774500  |
| 27088   | EHD2          | 0 | 2703   | EHD2          | 0 | chr19 | 52935500  |
| 27588   | EHD2          | 0 | 2203   | EHD2          | 0 | chr19 | 52936000  |
| 28088   | EHD2          | 0 | 1703   | EHD2          | 0 | chr19 | 52936500  |
| 705     | DDAH2         | 0 | 2518   | DDAH2         | 0 | chr6  | 31803500  |
| 1205    | DDAH2         | 0 | 2018   | DDAH2         | 0 | chr6  | 31804000  |
| 8121    | ZNF469        | 0 | 5166   | ZNF469        | 0 | chr16 | 87029500  |
| 8621    | ZNF469        | 0 | 4666   | ZNF469        | 0 | chr16 | 87030000  |
| 29512   | SLC12A7       | 0 | 32172  | SLC12A7       | 0 | chr5  | 1133000   |
| 20732   | PRKCZ         | 0 | 114194 | PRKCZ         | 0 | chr1  | 1992500   |
| 21232   | PRKCZ         | 0 | 113694 | PRKCZ         | 0 | chr1  | 1993000   |
| -76957  | FLJ40292      | 0 | 36061  | CACNA1B       | 0 | chr9  | 139856000 |
| -77457  | FLJ40292      | 0 | 35561  | CACNA1B       | 0 | chr9  | 139856500 |
| -77957  | FLJ40292      | 0 | 35061  | CACNA1B       | 0 | chr9  | 139857000 |
| -279784 | GYPC          | 0 | 71576  | BIN1          | 0 | chr2  | 127450500 |
| -280284 | GYPC          | 0 | 71076  | BIN1          | 0 | chr2  | 127451000 |
| 13457   | ZNF787        | 0 | 20461  | ZNF787        | 0 | chr19 | 61304000  |
| 13957   | ZNF787        | 0 | 19961  | ZNF787        | 0 | chr19 | 61304500  |
| 1407    | CORO1B        | 0 | 4059   | CORO1B        | 0 | chr11 | 66963500  |
| 1907    | CORO1B        | 0 | 3559   | CORO1B        | 0 | chr11 | 66964000  |
| 4732    | RHOXF2        | 0 | 735    | RHOXF2        | 0 | chrX  | 119095000 |
| 10284   | NOTCH1        | 0 | 41059  | NOTCH1        | 0 | chr9  | 138519000 |
| 9082    | C14orf115     | 0 | 2464   | C14orf115     | 0 | chr14 | 73894000  |
| -552780 | TP53TG3       | 0 | 536302 | UBE2MP1       | 0 | chr16 | 33725000  |
| 51143   | NFAM1         | 0 | 845    | NFAM1         | 0 | chr22 | 41157500  |
| 11738   | ARAP1         | 0 | 25551  | ARAP1         | 0 | chr11 | 72085500  |
| 12238   | ARAP1         | 0 | 25051  | ARAP1         | 0 | chr11 | 72086000  |
| 1491    | EXOSC4        | 0 | 539    | EXOSC4        | 0 | chr8  | 145207000 |
| 1991    | EXOSC4        | 0 | 39     | EXOSC4        | 0 | chr8  | 145207500 |
| 351     | XAGE1C,XAGE1A | 0 | 4629   | XAGE1A,XAGE1B | 0 | chrX  | 52529000  |
| 2275    | PNPLA7        | 0 | 88307  | PNPLA7        | 0 | chr9  | 139476500 |
| -7481   | CYP2D7P1      | 0 | 7962   | TCF20         | 0 | chr22 | 40878000  |
| -7981   | CYP2D7P1      | 0 | 7462   | TCF20         | 0 | chr22 | 40878500  |
| -243077 | ---           | 0 | 100267 | ZNF479        | 0 | chr7  | 57091000  |
| -243577 | ---           | 0 | 99767  | ZNF479        | 0 | chr7  | 57091500  |
| 17400   | SBF1          | 0 | 10820  | SBF1          | 0 | chr22 | 49249500  |
| -66493  | MAGEA11       | 0 | 394    | MAGEA9B       | 0 | chrX  | 148671000 |
| 16511   | ZNF366        | 0 | 47505  | ZNF366        | 0 | chr5  | 71791500  |

|         |              |   |        |           |   |       |           |
|---------|--------------|---|--------|-----------|---|-------|-----------|
| 17011   | ZNF366       | 0 | 47005  | ZNF366    | 0 | chr5  | 71792000  |
| 17511   | ZNF366       | 0 | 46505  | ZNF366    | 0 | chr5  | 71792500  |
| -100212 | C1orf192     | 0 | 37328  | FCGR2A    | 0 | chr1  | 159704500 |
| -100712 | C1orf192     | 0 | 36828  | FCGR2A    | 0 | chr1  | 159705000 |
| 1519    | H19          | 0 | 1141   | H19       | 0 | chr11 | 1974500   |
| 14041   | KDM6B        | 0 | 843    | KDM6B     | 0 | chr17 | 7698000   |
| -167    | FLJ44054     | 0 | 19396  | GAS6      | 0 | chr13 | 113527500 |
| -667    | FLJ44054     | 0 | 18896  | GAS6      | 0 | chr13 | 113528000 |
| -6599   | FRMPD1       | 0 | 301    | RG9MTD3   | 0 | chr9  | 37743500  |
| 1264    | LOC650623    | 0 | 4654   | LOC650623 | 0 | chr10 | 81114000  |
| 1764    | LOC650623    | 0 | 4154   | LOC650623 | 0 | chr10 | 81114500  |
| 440     | CTSD         | 0 | 10798  | CTSD      | 0 | chr11 | 1731000   |
| 940     | CTSD         | 0 | 10298  | CTSD      | 0 | chr11 | 1731500   |
| -1597   | JRK          | 0 | 8876   | PSCA      | 0 | chr8  | 143750000 |
| 2714    | C16orf54     | 0 | 841    | C16orf54  | 0 | chr16 | 29664000  |
| 3214    | C16orf54     | 0 | 341    | C16orf54  | 0 | chr16 | 29664500  |
| -16485  | ZNF146       | 0 | 81001  | ZFP14     | 0 | chr19 | 41438000  |
| -16985  | ZNF146       | 0 | 80501  | ZFP14     | 0 | chr19 | 41438500  |
| -12532  | HGC6.3       | 0 | 28401  | KIF25     | 0 | chr6  | 168133000 |
| 48606   | CELSR1       | 0 | 127731 | CELSR1    | 0 | chr22 | 45184000  |
| 49106   | CELSR1       | 0 | 127231 | CELSR1    | 0 | chr22 | 45184500  |
| 12592   | PQLC1        | 0 | 36641  | PQLC1     | 0 | chr18 | 75776000  |
| 13092   | PQLC1        | 0 | 36141  | PQLC1     | 0 | chr18 | 75776500  |
| -116441 | LOC100130238 | 0 | 93229  | FBRSL1    | 0 | chr12 | 131484000 |
| 11187   | NFATC1       | 0 | 117811 | NFATC1    | 0 | chr18 | 75272500  |
| 11687   | NFATC1       | 0 | 117311 | NFATC1    | 0 | chr18 | 75273000  |
| -28991  | TEX261       | 0 | 212    | OR7E91P   | 0 | chr2  | 71104500  |
| 288     | OR7E91P      | 0 | 5568   | OR7E91P   | 0 | chr2  | 71105000  |
| 13606   | CELSR1       | 0 | 162731 | CELSR1    | 0 | chr22 | 45149000  |
| 24853   | TBC1D24      | 0 | 3489   | TBC1D24   | 0 | chr16 | 2490000   |
| -43314  | FGFRL1       | 0 | 1268   | RNF212    | 0 | chr4  | 1054000   |
| -78045  | LOC400891    | 0 | 140213 | POM121L8P | 0 | chr22 | 19826500  |
| 5408    | DDX51        | 0 | 2333   | DDX51     | 0 | chr12 | 131192500 |
| 5908    | DDX51        | 0 | 1833   | DDX51     | 0 | chr12 | 131193000 |
| 6408    | DDX51        | 0 | 1333   | DDX51     | 0 | chr12 | 131193500 |
| 85152   | TSNARE1      | 0 | 105944 | TSNARE1   | 0 | chr8  | 143376500 |
| 85652   | TSNARE1      | 0 | 105444 | TSNARE1   | 0 | chr8  | 143377000 |
| 21476   | TTC38        | 0 | 4569   | TTC38     | 0 | chr22 | 45064000  |
| 21976   | TTC38        | 0 | 4069   | TTC38     | 0 | chr22 | 45064500  |
| 6648    | ZCCHC14      | 0 | 78961  | ZCCHC14   | 0 | chr16 | 86004000  |
| 7148    | ZCCHC14      | 0 | 78461  | ZCCHC14   | 0 | chr16 | 86004500  |
| 7648    | ZCCHC14      | 0 | 77961  | ZCCHC14   | 0 | chr16 | 86005000  |
| 8148    | ZCCHC14      | 0 | 77461  | ZCCHC14   | 0 | chr16 | 86005500  |
| 793     | FBXW5        | 0 | 3494   | FBXW5     | 0 | chr9  | 138955500 |
| 1293    | FBXW5        | 0 | 2994   | FBXW5     | 0 | chr9  | 138956000 |
| 25632   | SEC16A       | 0 | 17328  | SEC16A    | 0 | chr9  | 138480000 |
| 26132   | SEC16A       | 0 | 16828  | SEC16A    | 0 | chr9  | 138480500 |
| 26632   | SEC16A       | 0 | 16328  | SEC16A    | 0 | chr9  | 138481000 |
| 636     | MAGEA4       | 0 | 8298   | MAGEA4    | 0 | chrX  | 150836000 |
| 448     | MAGEA4       | 0 | 7798   | MAGEA4    | 0 | chrX  | 150836500 |
| 948     | MAGEA4       | 0 | 7298   | MAGEA4    | 0 | chrX  | 150837000 |
| -232    | RHBDL1       | 0 | 1615   | STUB1     | 0 | chr16 | 668500    |
| -8293   | CYTSA        | 0 | 1529   | ADORA2A   | 0 | chr22 | 23152000  |
| 125623  | RIN3         | 0 | 49587  | RIN3      | 0 | chr14 | 92175500  |
| 126123  | RIN3         | 0 | 49087  | RIN3      | 0 | chr14 | 92176000  |
| -392    | C10orf108    | 0 | 143983 | LARP4B    | 0 | chr10 | 701500    |
| -892    | C10orf108    | 0 | 143483 | LARP4B    | 0 | chr10 | 702000    |
| -23875  | POLR3D       | 0 | 254    | PIWIL2    | 0 | chr8  | 22188500  |

|          |             |   |         |             |   |       |           |
|----------|-------------|---|---------|-------------|---|-------|-----------|
| -4341    | ULK1        | 0 | 1741    | PUS1        | 0 | chr12 | 130978000 |
| 48187    | NFATC1      | 0 | 80811   | NFATC1      | 0 | chr18 | 75309500  |
| -8739    | RPL28       | 0 | 461     | UBE2S       | 0 | chr19 | 60604000  |
| 539      | UBE2S       | 0 | 6137    | UBE2S       | 0 | chr19 | 60605000  |
| 35363    | EXOC2       | 0 | 172609  | EXOC2       | 0 | chr6  | 465500    |
| 35863    | EXOC2       | 0 | 172109  | EXOC2       | 0 | chr6  | 466000    |
| 1053     | NR2E3       | 0 | 3324    | NR2E3       | 0 | chr15 | 69891000  |
| 1553     | NR2E3       | 0 | 2824    | NR2E3       | 0 | chr15 | 69891500  |
| 93995    | CELF4       | 0 | 228998  | CELF4       | 0 | chr18 | 33171000  |
| 5827     | SGSH        | 0 | 5294    | SGSH        | 0 | chr17 | 75803500  |
| -1038    | FAM131B     | 0 | 17481   | ZYX         | 0 | chr7  | 142771000 |
| 3806     | CHRNA2      | 0 | 15730   | CHRNA2      | 0 | chr8  | 27377000  |
| 8826     | RFX2        | 0 | 108664  | RFX2        | 0 | chr19 | 5953000   |
| 878530   | CAMTA1      | 0 | 105851  | CAMTA1      | 0 | chr1  | 7646500   |
| 229155   | CLEC16A     | 0 | 8545    | CLEC16A     | 0 | chr16 | 11175000  |
| -550     | APOB        | 0 | 2704037 | ATAD2B      | 0 | chr2  | 21121000  |
| -1050    | APOB        | 0 | 2703537 | ATAD2B      | 0 | chr2  | 21121500  |
| -1423    | C9orf45     | 0 | 7807    | STRBP       | 0 | chr9  | 124919000 |
| -191     | CGB7        | 0 | 5208    | NTF4        | 0 | chr19 | 54251000  |
| 34507    | AP3D1       | 0 | 16056   | AP3D1       | 0 | chr19 | 2086500   |
| -510     | AQP12B      | 0 | 8434    | AQP12A      | 0 | chr2  | 241271500 |
| -1010    | AQP12B      | 0 | 7934    | AQP12A      | 0 | chr2  | 241272000 |
| 12142    | FLT4        | 0 | 29730   | FLT4        | 0 | chr5  | 179979500 |
| 2667     | SLC9A3      | 0 | 48549   | SLC9A3      | 0 | chr5  | 529000    |
| 3167     | SLC9A3      | 0 | 48049   | SLC9A3      | 0 | chr5  | 529500    |
| 16188    | FRMD1       | 0 | 7188    | FRMD1       | 0 | chr6  | 168215500 |
| 16688    | FRMD1       | 0 | 6688    | FRMD1       | 0 | chr6  | 168216000 |
| 4598     | KNCN        | 0 | 974     | KNCN        | 0 | chr1  | 46788500  |
| 5098     | KNCN        | 0 | 474     | KNCN        | 0 | chr1  | 46789000  |
| 21141    | CHID1       | 0 | 21874   | CHID1       | 0 | chr11 | 879000    |
| 33737    | DNAH2       | 0 | 80283   | DNAH2       | 0 | chr17 | 7597500   |
| 34237    | DNAH2       | 0 | 79783   | DNAH2       | 0 | chr17 | 7598000   |
| 138      | RPL29P2     | 0 | 511     | RPL29P2     | 0 | chr17 | 7598500   |
| 17491    | ABR         | 0 | 166366  | ABR         | 0 | chr17 | 871000    |
| 17991    | ABR         | 0 | 165866  | ABR         | 0 | chr17 | 871500    |
| 18491    | ABR         | 0 | 165366  | ABR         | 0 | chr17 | 872000    |
| 1421     | EGR1        | 0 | 2403    | EGR1        | 0 | chr5  | 137830500 |
| 1921     | EGR1        | 0 | 1903    | EGR1        | 0 | chr5  | 137831000 |
| -11973   | NKX6-2      | 0 | 10386   | C10orf92    | 0 | chr10 | 134461500 |
| 39969    | ASMTL       | 0 | 9844    | ASMTL       | 0 | chrY  | 1522000   |
| 40469    | ASMTL       | 0 | 9344    | ASMTL       | 0 | chrY  | 1522500   |
| -1026778 | FLJ40330    | 0 | 1274435 | LOC654342   | 0 | chr2  | 89914000  |
| -1027278 | FLJ40330    | 0 | 1273935 | LOC654342   | 0 | chr2  | 89914500  |
| -68971   | TPI1P2      | 0 | 60      | LOC407835   | 0 | chr7  | 128553500 |
| 3108     | INPP5E      | 0 | 8077    | INPP5E      | 0 | chr9  | 138446000 |
| 16953    | SH3BP2      | 0 | 31121   | SH3BP2      | 0 | chr4  | 2781500   |
| 557      | C2CD4C      | 0 | 3170    | C2CD4C      | 0 | chr19 | 357000    |
| -875916  | GALR1       | 0 | 854262  | SALL3       | 0 | chr18 | 73987000  |
| -876416  | GALR1       | 0 | 853762  | SALL3       | 0 | chr18 | 73987500  |
| 273      | SNRPN,SNURF | 0 | 23322   | SNRPN,SNURF | 0 | chr15 | 22751500  |
| 14555    | TSPAN4      | 0 | 8116    | TSPAN4      | 0 | chr11 | 849000    |
| 46859    | FOXP4       | 0 | 9100    | FOXP4       | 0 | chr6  | 41669000  |
| 47359    | FOXP4       | 0 | 8600    | FOXP4       | 0 | chr6  | 41669500  |
| -61392   | C10orf108   | 0 | 82983   | LARP4B      | 0 | chr10 | 762500    |
| 66245    | ZNF710      | 0 | 13029   | ZNF710      | 0 | chr15 | 88412000  |
| 66745    | ZNF710      | 0 | 12529   | ZNF710      | 0 | chr15 | 88412500  |
| 3059     | LIF         | 0 | 3296    | LIF         | 0 | chr22 | 28969500  |
| -167359  | HS6ST1      | 0 | 1436904 | LOC389033   | 0 | chr2  | 128960000 |

|         |            |   |         |            |   |       |           |
|---------|------------|---|---------|------------|---|-------|-----------|
| -167859 | HS6ST1     | 0 | 1436404 | LOC389033  | 0 | chr2  | 128960500 |
| 144883  | KIAA1211   | 0 | 15647   | KIAA1211   | 0 | chr4  | 56876000  |
| 145383  | KIAA1211   | 0 | 15147   | KIAA1211   | 0 | chr4  | 56876500  |
| -1292   | WDR85      | 0 | 1851    | ZMYND19    | 0 | chr9  | 139594500 |
| -1792   | WDR85      | 0 | 1351    | ZMYND19    | 0 | chr9  | 139595000 |
| 17524   | TPPP       | 0 | 16010   | TPPP       | 0 | chr5  | 730500    |
| 18024   | TPPP       | 0 | 15510   | TPPP       | 0 | chr5  | 731000    |
| -1314   | FGFRL1     | 0 | 43268   | RNF212     | 0 | chr4  | 1012000   |
| -1814   | FGFRL1     | 0 | 42768   | RNF212     | 0 | chr4  | 1012500   |
| -121    | GDPD3      | 0 | 426     | MAPK3      | 0 | chr16 | 30032500  |
| 3923    | BEND3      | 0 | 45329   | BEND3      | 0 | chr6  | 107497000 |
| 35539   | DNAJC5     | 0 | 3339    | DNAJC5     | 0 | chr20 | 62032500  |
| 36039   | DNAJC5     | 0 | 2839    | DNAJC5     | 0 | chr20 | 62033000  |
| 36539   | DNAJC5     | 0 | 2339    | DNAJC5     | 0 | chr20 | 62033500  |
| 1016    | C16orf90   | 0 | 922     | C16orf90   | 0 | chr16 | 3484500   |
| 10812   | CPN2       | 0 | 350     | CPN2       | 0 | chr3  | 195553000 |
| -650    | CPN2       | 0 | 3271    | LRRC15     | 0 | chr3  | 195554000 |
| -1150   | CPN2       | 0 | 2771    | LRRC15     | 0 | chr3  | 195554500 |
| 8067    | CATSPER2P1 | 0 | 2288    | CATSPER2P1 | 0 | chr15 | 41823500  |
| -4432   | POLRMT     | 0 | 1925    | FGF22      | 0 | chr19 | 589000    |
| -4932   | POLRMT     | 0 | 1425    | FGF22      | 0 | chr19 | 589500    |
| -4531   | SLC12A4    | 0 | 7066    | DPEP3      | 0 | chr16 | 66560000  |
| -8255   | C1QTNF8    | 0 | 48741   | CACNA1H    | 0 | chr16 | 1094500   |
| -8755   | C1QTNF8    | 0 | 48241   | CACNA1H    | 0 | chr16 | 1095000   |
| -894097 | C20orf197  | 0 | 285453  | CDH4       | 0 | chr20 | 58975500  |
| -894597 | C20orf197  | 0 | 284953  | CDH4       | 0 | chr20 | 58976000  |
| -11918  | LOC154449  | 0 | 7718    | DLL1       | 0 | chr6  | 170425500 |
| -12418  | LOC154449  | 0 | 7218    | DLL1       | 0 | chr6  | 170426000 |
| 18898   | TEX101     | 0 | 11107   | TEX101     | 0 | chr19 | 48603500  |
| 19398   | TEX101     | 0 | 10607   | TEX101     | 0 | chr19 | 48604000  |
| 19898   | TEX101     | 0 | 10107   | TEX101     | 0 | chr19 | 48604500  |
| 21416   | LMNA       | 0 | 1781    | LMNA       | 0 | chr1  | 154372500 |
| -747    | FDPSL2A    | 0 | 4762    | DTX2       | 0 | chr7  | 75943000  |
| -1247   | FDPSL2A    | 0 | 4262    | DTX2       | 0 | chr7  | 75943500  |
| 21509   | AP2A1      | 0 | 18681   | AP2A1      | 0 | chr19 | 54983500  |
| 22009   | AP2A1      | 0 | 18181   | AP2A1      | 0 | chr19 | 54984000  |
| -1743   | ANUBL1     | 0 | 52672   | FAM21C     | 0 | chr10 | 45490000  |
| 23088   | PRKAR1B    | 0 | 139659  | PRKAR1B    | 0 | chr7  | 579000    |
| 23588   | PRKAR1B    | 0 | 139159  | PRKAR1B    | 0 | chr7  | 579500    |
| 24088   | PRKAR1B    | 0 | 138659  | PRKAR1B    | 0 | chr7  | 580000    |
| 7120    | CT45A6     | 0 | 910     | CT45A6     | 0 | chrX  | 134798000 |
| -105233 | LOC284632  | 0 | 2467    | GRHL3      | 0 | chr1  | 24516000  |
| 340     | ZBTB22     | 0 | 3197    | ZBTB22     | 0 | chr6  | 33390500  |
| 840     | ZBTB22     | 0 | 2697    | ZBTB22     | 0 | chr6  | 33391000  |
| 1340    | ZBTB22     | 0 | 2197    | ZBTB22     | 0 | chr6  | 33391500  |
| 1840    | ZBTB22     | 0 | 1697    | ZBTB22     | 0 | chr6  | 33392000  |
| 15123   | IGDCC4     | 0 | 26463   | IGDCC4     | 0 | chr15 | 63476000  |
| 15623   | IGDCC4     | 0 | 25963   | IGDCC4     | 0 | chr15 | 63476500  |
| -574274 | MARCH1     | 0 | 9108    | ANP32C     | 0 | chr4  | 165328500 |
| -700    | SLC37A4    | 0 | 12605   | HYOU1      | 0 | chr11 | 118407500 |
| 16582   | ACOT7      | 0 | 78091   | ACOT7      | 0 | chr1  | 6263500   |
| 71869   | DIP2C      | 0 | 343608  | DIP2C      | 0 | chr10 | 382000    |
| -1873   | PPP2R3B    | 0 | 235578  | SHOX       | 0 | chrY  | 269500    |
| -9812   | ADAMTSL5   | 0 | 1077    | PLK5P      | 0 | chr19 | 1474000   |
| 22711   | GGA3       | 0 | 2272    | GGA3       | 0 | chr17 | 70767000  |
| 23211   | GGA3       | 0 | 1772    | GGA3       | 0 | chr17 | 70767500  |
| 18729   | BRD3       | 0 | 18962   | BRD3       | 0 | chr9  | 135904000 |
| 1159    | PCDHGA12   | 0 | 81230   | PCDHGA12   | 0 | chr5  | 140791500 |

|          |              |   |         |          |   |       |           |
|----------|--------------|---|---------|----------|---|-------|-----------|
| 1659     | PCDHGA12     | 0 | 80730   | PCDHGA12 | 0 | chr5  | 140792000 |
| 2159     | PCDHGA12     | 0 | 80230   | PCDHGA12 | 0 | chr5  | 140792500 |
| -18104   | MYOC         | 0 | 32282   | VAMP4    | 0 | chr1  | 169906500 |
| 10918    | SHC2         | 0 | 33496   | SHC2     | 0 | chr19 | 378500    |
| -59350   | SLC46A3      | 0 | 246247  | MTUS2    | 0 | chr13 | 28250500  |
| 35052    | PDCL2        | 0 | 636     | PDCL2    | 0 | chr4  | 56152500  |
| 35552    | PDCL2        | 0 | 136     | PDCL2    | 0 | chr4  | 56153000  |
| -2880    | LY6G5C       | 0 | 3714    | BAT5     | 0 | chr6  | 31759000  |
| -101461  | RRN3P2       | 0 | 73041   | RUNDC2C  | 0 | chr16 | 29137000  |
| 6592     | ACOX3        | 0 | 67852   | ACOX3    | 0 | chr4  | 8425500   |
| 7092     | ACOX3        | 0 | 67352   | ACOX3    | 0 | chr4  | 8426000   |
| -13532   | HGC6.3       | 0 | 27401   | KIF25    | 0 | chr6  | 168134000 |
| -29241   | TAPT1        | 0 | 245761  | LDB2     | 0 | chr4  | 15866500  |
| -29741   | TAPT1        | 0 | 245261  | LDB2     | 0 | chr4  | 15867000  |
| 353      | ASPHD1       | 0 | 4878    | ASPHD1   | 0 | chr16 | 29820000  |
| 853      | ASPHD1       | 0 | 4378    | ASPHD1   | 0 | chr16 | 29820500  |
| -37313   | BIRC8        | 0 | 4813    | ZNF845   | 0 | chr19 | 58524000  |
| 32437    | NISCH        | 0 | 5128    | NISCH    | 0 | chr3  | 52497000  |
| 43935    | UHRF1        | 0 | 7665    | UHRF1    | 0 | chr19 | 4905500   |
| 210      | LCN6         | 0 | 4301    | LCN6     | 0 | chr9  | 138758500 |
| 710      | LCN6         | 0 | 3801    | LCN6     | 0 | chr9  | 138759000 |
| -73837   | LOC286135    | 0 | 35672   | TMEM66   | 0 | chr8  | 30004500  |
| 65540    | KNDC1        | 0 | 406     | KNDC1    | 0 | chr10 | 134889500 |
| -462148  | CWH43        | 0 | 3183032 | DCUN1D4  | 0 | chr4  | 49221000  |
| 5418     | SHC2         | 0 | 38996   | SHC2     | 0 | chr19 | 373000    |
| 7565     | CLCN7        | 0 | 22586   | CLCN7    | 0 | chr16 | 1442500   |
| 6284     | DPEP1        | 0 | 18840   | DPEP1    | 0 | chr16 | 88213500  |
| -16808   | SLC39A14     | 0 | 1540    | PPP3CC   | 0 | chr8  | 22353000  |
| -1562929 | TTY23B,TTY23 | 0 | 1361191 | TTY15    | 0 | chrY  | 11922500  |
| -1563429 | TTY23B,TTY23 | 0 | 1360691 | TTY15    | 0 | chrY  | 11923000  |
| 19205    | RASA3        | 0 | 131697  | RASA3    | 0 | chr13 | 113784500 |
| 19705    | RASA3        | 0 | 131197  | RASA3    | 0 | chr13 | 113785000 |
| 135284   | DLGAP4       | 0 | 97454   | DLGAP4   | 0 | chr20 | 34493000  |
| 1500     | NTN3         | 0 | 1147    | NTN3     | 0 | chr16 | 2463000   |
| -239519  | FAT1         | 0 | 1032418 | ZFP42    | 0 | chr4  | 188121500 |
| -240019  | FAT1         | 0 | 1031918 | ZFP42    | 0 | chr4  | 188122000 |
| -149651  | ZNF117       | 0 | 537     | INTS4L1  | 0 | chr7  | 64238500  |
| -150151  | ZNF117       | 0 | 37      | INTS4L1  | 0 | chr7  | 64239000  |
| -1663869 | CA10         | 0 | 237     | KIF2B    | 0 | chr17 | 49255000  |
| 263      | KIF2B        | 0 | 2072    | KIF2B    | 0 | chr17 | 49255500  |
| 60352    | C7orf50      | 0 | 80919   | C7orf50  | 0 | chr7  | 1063500   |
| 334      | GPR146       | 0 | 1423    | GPR146   | 0 | chr7  | 1064000   |
| 834      | GPR146       | 0 | 923     | GPR146   | 0 | chr7  | 1064500   |
| 29214    | TERT         | 0 | 12662   | TERT     | 0 | chr5  | 1335500   |
| 47       | FZR1         | 0 | 13755   | FZR1     | 0 | chr19 | 3474000   |
| -781     | MOSC2        | 0 | 1661    | MOSC1    | 0 | chr1  | 219025000 |
| 86537    | COL9A1       | 0 | 507     | COL9A1   | 0 | chr6  | 71069000  |
| 17786    | ASPSCR1      | 0 | 22071   | ASPSCR1  | 0 | chr17 | 77546500  |
| 345      | FGF21        | 0 | 1894    | FGF21    | 0 | chr19 | 53951500  |
| 37872    | WLS          | 0 | 69341   | WLS      | 0 | chr1  | 68401500  |
| -1645    | GNB1         | 0 | 22125   | CALML6   | 0 | chr1  | 1814000   |
| 3453     | C19orf63     | 0 | 3420    | C19orf63 | 0 | chr19 | 55675000  |
| 28531    | PPP2R3B      | 0 | 24127   | PPP2R3B  | 0 | chrX  | 243500    |
| 29031    | PPP2R3B      | 0 | 23627   | PPP2R3B  | 0 | chrX  | 244000    |
| 22562    | INTS1        | 0 | 11544   | INTS1    | 0 | chr7  | 1499000   |
| 23562    | INTS1        | 0 | 10544   | INTS1    | 0 | chr7  | 1500000   |
| 6545     | ADAMTS2      | 0 | 224935  | ADAMTS2  | 0 | chr5  | 178480000 |
| 7045     | ADAMTS2      | 0 | 224435  | ADAMTS2  | 0 | chr5  | 178480500 |

|          |              |   |         |           |   |       |           |
|----------|--------------|---|---------|-----------|---|-------|-----------|
| 57852    | C7orf50      | 0 | 83419   | C7orf50   | 0 | chr7  | 1061000   |
| -96212   | C1orf192     | 0 | 41328   | FCGR2A    | 0 | chr1  | 159700500 |
| -96712   | C1orf192     | 0 | 40828   | FCGR2A    | 0 | chr1  | 159701000 |
| -97212   | C1orf192     | 0 | 40328   | FCGR2A    | 0 | chr1  | 159701500 |
| -97712   | C1orf192     | 0 | 39828   | FCGR2A    | 0 | chr1  | 159702000 |
| -98212   | C1orf192     | 0 | 39328   | FCGR2A    | 0 | chr1  | 159702500 |
| -98712   | C1orf192     | 0 | 38828   | FCGR2A    | 0 | chr1  | 159703000 |
| -99212   | C1orf192     | 0 | 38328   | FCGR2A    | 0 | chr1  | 159703500 |
| -99712   | C1orf192     | 0 | 37828   | FCGR2A    | 0 | chr1  | 159704000 |
| -361793  | ZNF716       | 0 | 4490104 | LOC643955 | 0 | chr7  | 57899000  |
| -362293  | ZNF716       | 0 | 4489604 | LOC643955 | 0 | chr7  | 57899500  |
| -138579  | GFPT2        | 0 | 2522    | CNOT6     | 0 | chr5  | 179851500 |
| -139079  | GFPT2        | 0 | 2022    | CNOT6     | 0 | chr5  | 179852000 |
| 54219    | FAM19A5      | 0 | 128750  | FAM19A5   | 0 | chr22 | 47405000  |
| 54719    | FAM19A5      | 0 | 128250  | FAM19A5   | 0 | chr22 | 47405500  |
| 20099    | TFAP2A       | 0 | 2783    | TFAP2A    | 0 | chr6  | 10525000  |
| 5108     | INPP5E       | 0 | 6077    | INPP5E    | 0 | chr9  | 138448000 |
| 5608     | INPP5E       | 0 | 5577    | INPP5E    | 0 | chr9  | 138448500 |
| -2408    | GRIP2        | 0 | 107256  | C3orf19   | 0 | chr3  | 14561000  |
| 1505     | LOC92659     | 0 | 1419    | LOC92659  | 0 | chr17 | 77480500  |
| 2005     | LOC92659     | 0 | 919     | LOC92659  | 0 | chr17 | 77481000  |
| 2568     | GNPTG        | 0 | 8853    | GNPTG     | 0 | chr16 | 1344500   |
| 3068     | GNPTG        | 0 | 8353    | GNPTG     | 0 | chr16 | 1345000   |
| 24495    | THOP1        | 0 | 3599    | THOP1     | 0 | chr19 | 2761000   |
| 24995    | THOP1        | 0 | 3099    | THOP1     | 0 | chr19 | 2761500   |
| -1000986 | C1orf87      | 0 | 2533    | NFIA      | 0 | chr1  | 61313000  |
| -36166   | C14orf70     | 0 | 18005   | DLK1      | 0 | chr14 | 100245000 |
| -125441  | LOC100130238 | 0 | 84229   | FBRSL1    | 0 | chr12 | 131493000 |
| 23399    | ABCA7        | 0 | 2070    | ABCA7     | 0 | chr19 | 1014500   |
| 23899    | ABCA7        | 0 | 1570    | ABCA7     | 0 | chr19 | 1015000   |
| 251047   | MAD1L1       | 0 | 166109  | MAD1L1    | 0 | chr7  | 2073000   |
| 251547   | MAD1L1       | 0 | 165609  | MAD1L1    | 0 | chr7  | 2073500   |
| -110645  | SLC45A4      | 0 | 1329    | LOC731779 | 0 | chr8  | 142418500 |
| 8865     | TFCP2L1      | 0 | 59748   | TFCP2L1   | 0 | chr2  | 121699500 |
| 9365     | TFCP2L1      | 0 | 59248   | TFCP2L1   | 0 | chr2  | 121700000 |
| 25506    | DNAH10       | 0 | 147718  | DNAH10    | 0 | chr12 | 122838500 |
| -2061    | CYB561       | 0 | 34165   | ACE       | 0 | chr17 | 58874000  |
| 6357     | LRRC47       | 0 | 9928    | LRRC47    | 0 | chr1  | 3693000   |
| -818     | TTL8         | 0 | 3946    | MLC1      | 0 | chr22 | 48836000  |
| 4573     | MEX3A        | 0 | 5413    | MEX3A     | 0 | chr1  | 154313000 |
| 5073     | MEX3A        | 0 | 4913    | MEX3A     | 0 | chr1  | 154313500 |
| 5573     | MEX3A        | 0 | 4413    | MEX3A     | 0 | chr1  | 154314000 |
| 1266     | CHRFAM7A     | 0 | 31156   | CHRFAM7A  | 0 | chr15 | 28442000  |
| 28472    | PSMD9        | 0 | 654     | PSMD9     | 0 | chr12 | 120839500 |
| 28972    | PSMD9        | 0 | 154     | PSMD9     | 0 | chr12 | 120840000 |
| -8523    | GPER         | 0 | 50569   | ZFAND2A   | 0 | chr7  | 1108500   |
| -9523    | GPER         | 0 | 49569   | ZFAND2A   | 0 | chr7  | 1109500   |
| 705990   | PTPRN2       | 0 | 342743  | PTPRN2    | 0 | chr7  | 157730500 |
| -78      | XAGE1D       | 0 | 105709  | SSX8      | 0 | chrX  | 52563000  |
| -578     | XAGE1D       | 0 | 105209  | SSX8      | 0 | chrX  | 52563500  |
| -1061    | CYB561       | 0 | 35165   | ACE       | 0 | chr17 | 58873000  |
| -699     | SRMS         | 0 | 4816    | C20orf195 | 0 | chr20 | 61650000  |
| 1067     | LOC650623    | 0 | 4850    | LOC650623 | 0 | chr10 | 81434000  |
| 1567     | LOC650623    | 0 | 4350    | LOC650623 | 0 | chr10 | 81434500  |
| 12579    | RFPL2        | 0 | 1718    | RFPL2     | 0 | chr22 | 30929000  |
| 5857     | ATP11A       | 0 | 190983  | ATP11A    | 0 | chr13 | 112398500 |
| 6357     | ATP11A       | 0 | 190483  | ATP11A    | 0 | chr13 | 112399000 |
| 10065    | GRM6         | 0 | 6730    | GRM6      | 0 | chr5  | 178348000 |

|         |             |   |        |           |   |       |           |
|---------|-------------|---|--------|-----------|---|-------|-----------|
| 10565   | GRM6        | 0 | 6230   | GRM6      | 0 | chr5  | 178348500 |
| 152047  | MAD1L1      | 0 | 265109 | MAD1L1    | 0 | chr7  | 1974000   |
| 152547  | MAD1L1      | 0 | 264609 | MAD1L1    | 0 | chr7  | 1974500   |
| 20366   | LMF1        | 0 | 96985  | LMF1      | 0 | chr16 | 864000    |
| 78834   | ACTN4       | 0 | 4010   | ACTN4     | 0 | chr19 | 43909000  |
| 79334   | ACTN4       | 0 | 3510   | ACTN4     | 0 | chr19 | 43909500  |
| 33705   | ADAMTSL2    | 0 | 6961   | ADAMTSL2  | 0 | chr9  | 135423500 |
| 1796    | GLYR1       | 0 | 42304  | GLYR1     | 0 | chr16 | 4795000   |
| -372101 | SNORD114-31 | 0 | 186812 | DIO3OS    | 0 | chr14 | 100901500 |
| 6961    | FUT2        | 0 | 3003   | FUT2      | 0 | chr19 | 53898000  |
| 7461    | FUT2        | 0 | 2503   | FUT2      | 0 | chr19 | 53898500  |
| 5959    | LPCAT1      | 0 | 56576  | LPCAT1    | 0 | chr5  | 1520500   |
| 6459    | LPCAT1      | 0 | 56076  | LPCAT1    | 0 | chr5  | 1521000   |
| 6316    | CASKIN1     | 0 | 12966  | CASKIN1   | 0 | chr16 | 2173500   |
| 6816    | CASKIN1     | 0 | 12466  | CASKIN1   | 0 | chr16 | 2174000   |
| -24174  | CAMSAP1     | 0 | 1635   | UBAC1     | 0 | chr9  | 137963000 |
| -24674  | CAMSAP1     | 0 | 1135   | UBAC1     | 0 | chr9  | 137963500 |
| -320    | TACR2       | 0 | 34231  | TSPAN15   | 0 | chr10 | 70847000  |
| 82501   | JPH3        | 0 | 12762  | JPH3      | 0 | chr16 | 86276500  |
| 3994    | ABCA2       | 0 | 17695  | ABCA2     | 0 | chr9  | 139025500 |
| 4494    | ABCA2       | 0 | 17195  | ABCA2     | 0 | chr9  | 139026000 |
| -71082  | PTENP1      | 0 | 2014   | PRSS3     | 0 | chr9  | 33738500  |
| -5548   | LPPR3       | 0 | 330    | AZU1      | 0 | chr19 | 778500    |
| 170     | AZU1        | 0 | 4017   | AZU1      | 0 | chr19 | 779000    |
| 2409    | ALPP        | 0 | 1843   | ALPP      | 0 | chr2  | 232954000 |
| 2039    | LRRC4B      | 0 | 49114  | LRRC4B    | 0 | chr19 | 55714000  |
| 2539    | LRRC4B      | 0 | 48614  | LRRC4B    | 0 | chr19 | 55714500  |
| -168    | PGBD3       | 0 | 84646  | CHAT      | 0 | chr10 | 50402500  |
| 128982  | PTPRS       | 0 | 6314   | PTPRS     | 0 | chr19 | 5285500   |
| 129482  | PTPRS       | 0 | 5814   | PTPRS     | 0 | chr19 | 5286000   |
| -2446   | C10orf93    | 0 | 142898 | GPR123    | 0 | chr10 | 134608500 |
| 679     | GRAMD4      | 0 | 52352  | GRAMD4    | 0 | chr22 | 45402000  |
| 241     | SEPT9       | 0 | 124273 | SEPT9     | 0 | chr17 | 72884000  |
| -52870  | LY6H        | 0 | 442    | GPIHBP1   | 0 | chr8  | 144366000 |
| 20607   | PRDM15      | 0 | 57660  | PRDM15    | 0 | chr21 | 42115000  |
| -168946 | TP53TG3     | 0 | 31797  | SLC6A10P  | 0 | chr16 | 32764500  |
| -169446 | TP53TG3     | 0 | 31297  | SLC6A10P  | 0 | chr16 | 32765000  |
| 1000    | NTN3        | 0 | 1647   | NTN3      | 0 | chr16 | 2462500   |
| 6606    | LOC642852   | 0 | 2696   | LOC642852 | 0 | chr21 | 45539000  |
| 4153    | ASMT        | 0 | 43474  | ASMT      | 0 | chrX  | 1678500   |
| 10391   | ZNF707      | 0 | 543    | ZNF707    | 0 | chr8  | 144849000 |
| 10891   | ZNF707      | 0 | 43     | ZNF707    | 0 | chr8  | 144849500 |
| -1658   | STK24       | 0 | 160057 | SLC15A1   | 0 | chr13 | 97974000  |
| 4644    | C11orf35    | 0 | 1279   | C11orf35  | 0 | chr11 | 549500    |
| -6285   | DYSFIP1     | 0 | 1822   | P4HB      | 0 | chr17 | 77392500  |
| -19521  | SOX8        | 0 | 57584  | LOC146336 | 0 | chr16 | 996500    |
| -20021  | SOX8        | 0 | 57084  | LOC146336 | 0 | chr16 | 997000    |
| 119     | C3orf77     | 0 | 90093  | C3orf77   | 0 | chr3  | 44258500  |
| 2022    | LSP1        | 0 | 21569  | LSP1      | 0 | chr11 | 1848500   |
| 1975    | C19orf34    | 0 | 48     | C19orf34  | 0 | chr19 | 1905500   |
| 2560    | BRD1        | 0 | 48956  | BRD1      | 0 | chr22 | 48555500  |
| -29587  | NCRNA00175  | 0 | 851    | COL18A1   | 0 | chr21 | 45699000  |
| -140639 | IER5L       | 0 | 2115   | C9orf106  | 0 | chr9  | 131121000 |
| -96227  | RTN1        | 0 | 364881 | C14orf135 | 0 | chr14 | 59263500  |
| -96727  | RTN1        | 0 | 364381 | C14orf135 | 0 | chr14 | 59264000  |
| -46597  | PDGFB       | 0 | 21332  | RPL3      | 0 | chr22 | 38017500  |
| 3689    | MRPL12      | 0 | 453    | MRPL12    | 0 | chr17 | 77284500  |
| 3079    | LOC619207   | 0 | 11443  | LOC619207 | 0 | chr10 | 135120500 |

|          |           |   |         |            |   |       |           |
|----------|-----------|---|---------|------------|---|-------|-----------|
| 3579     | LOC619207 | 0 | 10943   | LOC619207  | 0 | chr10 | 135121000 |
| -36117   | ZNF624    | 0 | 363     | CCDC144A   | 0 | chr17 | 16534000  |
| 137      | CCDC144A  | 0 | 84536   | CCDC144A   | 0 | chr17 | 16534500  |
| 23282    | FLNC      | 0 | 5564    | FLNC       | 0 | chr7  | 128281000 |
| 24282    | FLNC      | 0 | 4564    | FLNC       | 0 | chr7  | 128282000 |
| 9047     | FZR1      | 0 | 4755    | FZR1       | 0 | chr19 | 3483000   |
| -51370   | LY6H      | 0 | 1942    | GPIHBP1    | 0 | chr8  | 144364500 |
| -51870   | LY6H      | 0 | 1442    | GPIHBP1    | 0 | chr8  | 144365000 |
| 37965    | ANKRD11   | 0 | 184970  | ANKRD11    | 0 | chr16 | 87899500  |
| -52074   | VPREB1    | 0 | 462     | LOC96610   | 0 | chr22 | 20982000  |
| 533      | GPR35     | 0 | 1342    | GPR35      | 0 | chr2  | 241218000 |
| -7035    | FAM132A   | 0 | 154     | UBE2J2     | 0 | chr1  | 1179000   |
| 346      | UBE2J2    | 0 | 19597   | UBE2J2     | 0 | chr1  | 1179500   |
| 1346     | UBE2J2    | 0 | 18597   | UBE2J2     | 0 | chr1  | 1180500   |
| -123678  | FAM196B   | 0 | 1494    | FOXI1      | 0 | chr5  | 169464000 |
| -124178  | FAM196B   | 0 | 994     | FOXI1      | 0 | chr5  | 169464500 |
| 27259    | CACNA1H   | 0 | 41273   | CACNA1H    | 0 | chr16 | 1170500   |
| -310272  | SHH       | 0 | 417945  | NCRNA00244 | 0 | chr7  | 155608000 |
| -310772  | SHH       | 0 | 417445  | NCRNA00244 | 0 | chr7  | 155608500 |
| 2060     | TCEB3B    | 0 | 986     | TCEB3B     | 0 | chr18 | 42815000  |
| -1020253 | GOT2      | 0 | 1898735 | CDH8       | 0 | chr16 | 58346000  |
| -1020753 | GOT2      | 0 | 1898235 | CDH8       | 0 | chr16 | 58346500  |
| -3646    | TFAMP1    | 0 | 124132  | ELFN1      | 0 | chr7  | 1626500   |
| -4146    | TFAMP1    | 0 | 123632  | ELFN1      | 0 | chr7  | 1627000   |
| 6126     | TNNT3     | 0 | 13012   | TNNT3      | 0 | chr11 | 1903500   |
| 98445    | ANO1      | 0 | 12799   | ANO1       | 0 | chr11 | 69700500  |
| 98945    | ANO1      | 0 | 12299   | ANO1       | 0 | chr11 | 69701000  |
| 21015    | STK32C    | 0 | 79467   | STK32C     | 0 | chr10 | 133892000 |
| 11961    | NDUFA13   | 0 | 573     | NDUFA13    | 0 | chr19 | 19499500  |
| 12461    | NDUFA13   | 0 | 73      | NDUFA13    | 0 | chr19 | 19500000  |
| 3304     | C19orf28  | 0 | 10071   | C19orf28   | 0 | chr19 | 3498500   |
| 13742    | C11orf2   | 0 | 1756    | C11orf2    | 0 | chr11 | 64634000  |
| 1867     | PRR23C    | 0 | 924     | PRR23C     | 0 | chr3  | 140245500 |
| 41       | SH3TC1    | 0 | 41730   | SH3TC1     | 0 | chr4  | 8252000   |
| 541      | SH3TC1    | 0 | 41230   | SH3TC1     | 0 | chr4  | 8252500   |
| 5708     | TCF3      | 0 | 35286   | TCF3       | 0 | chr19 | 1566000   |
| 6208     | TCF3      | 0 | 34786   | TCF3       | 0 | chr19 | 1566500   |
| 22688    | FRMD1     | 0 | 688     | FRMD1      | 0 | chr6  | 168222000 |
| 23188    | FRMD1     | 0 | 188     | FRMD1      | 0 | chr6  | 168222500 |
| -1442    | FRG2C     | 0 | 68218   | ZNF717     | 0 | chr3  | 75800500  |
| 33759    | CACNA1H   | 0 | 34773   | CACNA1H    | 0 | chr16 | 1177000   |
| 5892     | CHRNA4    | 0 | 12139   | CHRNA4     | 0 | chr20 | 61451000  |
| 27522    | PI4KA     | 0 | 123570  | PI4KA      | 0 | chr22 | 19419500  |
| 4669     | ZNF526    | 0 | 3193    | ZNF526     | 0 | chr19 | 47421000  |
| 52369    | DIP2C     | 0 | 363108  | DIP2C      | 0 | chr10 | 362500    |
| 52869    | DIP2C     | 0 | 362608  | DIP2C      | 0 | chr10 | 363000    |
| 14025    | KCNQ2     | 0 | 24937   | KCNQ2      | 0 | chr20 | 61549500  |
| 14525    | KCNQ2     | 0 | 24437   | KCNQ2      | 0 | chr20 | 61550000  |
| -129     | E2F1      | 0 | 16210   | PXMP4      | 0 | chr20 | 31738000  |
| -1766    | GNG13     | 0 | 2943    | PRR25      | 0 | chr16 | 792500    |
| 13105    | TBC1D14   | 0 | 110246  | TBC1D14    | 0 | chr4  | 6975500   |
| 13605    | TBC1D14   | 0 | 109746  | TBC1D14    | 0 | chr4  | 6976000   |
| 14105    | TBC1D14   | 0 | 109246  | TBC1D14    | 0 | chr4  | 6976500   |
| -303058  | POTEG     | 0 | 95953   | POTEM      | 0 | chr14 | 18958000  |
| -303558  | POTEG     | 0 | 95453   | POTEM      | 0 | chr14 | 18958500  |
| -304058  | POTEG     | 0 | 94953   | POTEM      | 0 | chr14 | 18959000  |
| 87232    | FAM120B   | 0 | 11162   | FAM120B    | 0 | chr6  | 170545000 |
| -48036   | GRTP1     | 0 | 9760    | ADPRHL1    | 0 | chr13 | 113114500 |



|         |              |   |        |           |   |       |           |
|---------|--------------|---|--------|-----------|---|-------|-----------|
| -48536  | GRTP1        | 0 | 9260   | ADPRHL1   | 0 | chr13 | 113115000 |
| -289    | NUP133       | 0 | 7951   | ABCB10    | 0 | chr1  | 227711000 |
| 163     | WDR88        | 0 | 43543  | WDR88     | 0 | chr19 | 38315000  |
| 23729   | BRD3         | 0 | 13962  | BRD3      | 0 | chr9  | 135909000 |
| -432    | C2CD2        | 0 | 32508  | ZNF295    | 0 | chr21 | 42247500  |
| -932    | C2CD2        | 0 | 32008  | ZNF295    | 0 | chr21 | 42248000  |
| 88537   | PCNT         | 0 | 33110  | PCNT      | 0 | chr21 | 46657000  |
| 11099   | ANK1         | 0 | 232437 | ANK1      | 0 | chr8  | 41641000  |
| 11599   | ANK1         | 0 | 231937 | ANK1      | 0 | chr8  | 41641500  |
| -301954 | SIX2         | 0 | 77323  | SRBD1     | 0 | chr2  | 45392000  |
| 50973   | LOXHD1       | 0 | 41124  | LOXHD1    | 0 | chr18 | 42394500  |
| -453274 | ERICH1       | 0 | 312475 | DLGAP2    | 0 | chr8  | 1124500   |
| -453774 | ERICH1       | 0 | 311975 | DLGAP2    | 0 | chr8  | 1125000   |
| -454274 | ERICH1       | 0 | 311475 | DLGAP2    | 0 | chr8  | 1125500   |
| 22944   | SLC19A1      | 0 | 4779   | SLC19A1   | 0 | chr21 | 45782000  |
| 93893   | GNG4         | 0 | 8416   | GNG4      | 0 | chr1  | 233871500 |
| 94393   | GNG4         | 0 | 7916   | GNG4      | 0 | chr1  | 233872000 |
| 894     | SIRT7        | 0 | 5332   | SIRT7     | 0 | chr17 | 77464000  |
| 25491   | CPNE9        | 0 | 592    | CPNE9     | 0 | chr3  | 9746000   |
| -20529  | BTBD6        | 0 | 43125  | PACS2     | 0 | chr14 | 104809000 |
| 5126    | SCARF2       | 0 | 8146   | SCARF2    | 0 | chr22 | 19114000  |
| -8202   | CCDC81       | 0 | 9797   | ME3       | 0 | chr11 | 85820000  |
| 8591    | CECR5        | 0 | 19177  | CECR5     | 0 | chr22 | 16007000  |
| 9091    | CECR5        | 0 | 18677  | CECR5     | 0 | chr22 | 16007500  |
| 24428   | PCGF3        | 0 | 40427  | PCGF3     | 0 | chr4  | 714000    |
| 24928   | PCGF3        | 0 | 39927  | PCGF3     | 0 | chr4  | 714500    |
| 25428   | PCGF3        | 0 | 39427  | PCGF3     | 0 | chr4  | 715000    |
| 62177   | HSPG2        | 0 | 52837  | HSPG2     | 0 | chr1  | 22083500  |
| -21723  | POTED        | 0 | 15991  | LOC441956 | 0 | chr21 | 13957500  |
| -22223  | POTED        | 0 | 15491  | LOC441956 | 0 | chr21 | 13958000  |
| -371101 | SNORD114-31  | 0 | 187812 | DIO3OS    | 0 | chr14 | 100900500 |
| -582    | LOC100127888 | 0 | 41633  | NTSR1     | 0 | chr20 | 60769000  |
| -108614 | C7orf28B     | 0 | 247770 | C1GALT1   | 0 | chr7  | 6941000   |
| -109114 | C7orf28B     | 0 | 247270 | C1GALT1   | 0 | chr7  | 6941500   |
| 4064    | GRIN3B       | 0 | 5223   | GRIN3B    | 0 | chr19 | 955500    |
| 3688    | C21orf128    | 0 | 2713   | C21orf128 | 0 | chr21 | 42399000  |
| 87362   | LTBP2        | 0 | 26787  | LTBP2     | 0 | chr14 | 74122000  |
| 87862   | LTBP2        | 0 | 26287  | LTBP2     | 0 | chr14 | 74122500  |
| 80375   | PPP6R2       | 0 | 21380  | PPP6R2    | 0 | chr22 | 49209000  |
| 80875   | PPP6R2       | 0 | 20880  | PPP6R2    | 0 | chr22 | 49209500  |
| 101369  | DIP2C        | 0 | 314108 | DIP2C     | 0 | chr10 | 411500    |
| 102369  | DIP2C        | 0 | 313108 | DIP2C     | 0 | chr10 | 412500    |
| -57     | MORN3        | 0 | 43040  | TMEM120B  | 0 | chr12 | 120592000 |
| -358    | MBD1         | 0 | 210    | CXXC1     | 0 | chr18 | 46062500  |
| -744410 | MGC16025     | 0 | 22328  | NDUFA10   | 0 | chr2  | 240526500 |
| 34      | C1QL4        | 0 | 4738   | C1QL4     | 0 | chr12 | 48012500  |
| 534     | C1QL4        | 0 | 4238   | C1QL4     | 0 | chr12 | 48013000  |
| -34984  | PAX4         | 0 | 1437   | SND1      | 0 | chr7  | 127078000 |
| 140917  | NTN1         | 0 | 81542  | NTN1      | 0 | chr17 | 9006500   |
| 141417  | NTN1         | 0 | 81042  | NTN1      | 0 | chr17 | 9007000   |
| -364274 | ERICH1       | 0 | 401475 | DLGAP2    | 0 | chr8  | 1035500   |
| -2859   | H19          | 0 | 128422 | IGF2      | 0 | chr11 | 1978500   |
| 701     | LY6D         | 0 | 1010   | LY6D      | 0 | chr8  | 143864000 |
| 1201    | LY6D         | 0 | 510    | LY6D      | 0 | chr8  | 143864500 |
| 8211    | KIAA0415     | 0 | 7925   | KIAA0415  | 0 | chr7  | 4790000   |
| 8711    | KIAA0415     | 0 | 7425   | KIAA0415  | 0 | chr7  | 4790500   |
| 76007   | SKI          | 0 | 5511   | SKI       | 0 | chr1  | 2226000   |
| -1698   | SULT1A2      | 0 | 7416   | SULT1A1   | 0 | chr16 | 28517000  |

|         |                  |   |        |                 |   |       |           |
|---------|------------------|---|--------|-----------------|---|-------|-----------|
| 6892    | KRT2             | 0 | 726    | KRT2            | 0 | chr12 | 51331500  |
| 5562    | INTS1            | 0 | 28544  | INTS1           | 0 | chr7  | 1482000   |
| 15352   | C7orf50          | 0 | 125919 | C7orf50         | 0 | chr7  | 1018500   |
| 15852   | C7orf50          | 0 | 125419 | C7orf50         | 0 | chr7  | 1019000   |
| 1871    | LYPD2            | 0 | 454    | LYPD2           | 0 | chr8  | 143830500 |
| 18407   | CSNK1A1P1        | 0 | 999    | CSNK1A1P1       | 0 | chr15 | 34897000  |
| -1      | CSNK1A1P1        | 0 | 45935  | LOC145845       | 0 | chr15 | 34898000  |
| -5204   | ZNF586           | 0 | 21261  | ZNF552          | 0 | chr19 | 62989000  |
| -5704   | ZNF586           | 0 | 20761  | ZNF552          | 0 | chr19 | 62989500  |
| 60685   | TMEM51           | 0 | 6060   | TMEM51          | 0 | chr1  | 15413500  |
| -36624  | IMPA2            | 0 | 186817 | CIDEA           | 0 | chr18 | 12057500  |
| 9685    | DMPK             | 0 | 3155   | DMPK            | 0 | chr19 | 50974500  |
| -29189  | NFATC1           | 0 | 121288 | CTDP1           | 0 | chr18 | 75419500  |
| -29689  | NFATC1           | 0 | 120788 | CTDP1           | 0 | chr18 | 75420000  |
| -30189  | NFATC1           | 0 | 120288 | CTDP1           | 0 | chr18 | 75420500  |
| -801    | LHPP             | 0 | 4352   | FAM53B          | 0 | chr10 | 126293500 |
| -1301   | LHPP             | 0 | 3852   | FAM53B          | 0 | chr10 | 126294000 |
| -28087  | NCRNA00175       | 0 | 2351   | COL18A1         | 0 | chr21 | 45697500  |
| 8837    | BAIAP3           | 0 | 5943   | BAIAP3          | 0 | chr16 | 1333500   |
| 9337    | BAIAP3           | 0 | 5443   | BAIAP3          | 0 | chr16 | 1334000   |
| 63      | KCNQ3            | 0 | 351686 | KCNQ3           | 0 | chr8  | 133210500 |
| 563     | KCNQ3            | 0 | 351186 | KCNQ3           | 0 | chr8  | 133211000 |
| 4846    | OPLAH            | 0 | 4572   | OPLAH           | 0 | chr8  | 145183000 |
| 5346    | OPLAH            | 0 | 4072   | OPLAH           | 0 | chr8  | 145183500 |
| 2653    | ASMT             | 0 | 44974  | ASMT            | 0 | chrY  | 1677000   |
| 2371    | KIFC3            | 0 | 37430  | KIFC3           | 0 | chr16 | 56352000  |
| 2871    | KIFC3            | 0 | 36930  | KIFC3           | 0 | chr16 | 56352500  |
| 5870    | C14orf80         | 0 | 2129   | C14orf80        | 0 | chr14 | 105034500 |
| 6370    | C14orf80         | 0 | 1629   | C14orf80        | 0 | chr14 | 105035000 |
| -1140   | CXorf49,CXorf49E | 0 | 43864  | Xorf49,CXorf49B | 0 | chrX  | 70856000  |
| -1640   | CXorf49,CXorf49E | 0 | 43364  | Xorf49,CXorf49B | 0 | chrX  | 70856500  |
| -8119   | IFT122           | 0 | 171    | RHO             | 0 | chr3  | 130730000 |
| -961    | MYO5A            | 0 | 17223  | ARPP19          | 0 | chr15 | 50609500  |
| -900042 | SVIP             | 0 | 767131 | LUZP2           | 0 | chr11 | 23708000  |
| -900542 | SVIP             | 0 | 766631 | LUZP2           | 0 | chr11 | 23708500  |
| 217163  | VAV2             | 0 | 13267  | VAV2            | 0 | chr9  | 135834000 |
| -479    | SYT10            | 0 | 581982 | ALG10           | 0 | chr12 | 33484500  |
| -17246  | C17orf91         | 0 | 9379   | SERPINF2        | 0 | chr17 | 1583500   |
| -17746  | C17orf91         | 0 | 8879   | SERPINF2        | 0 | chr17 | 1584000   |
| 51      | RASSF7           | 0 | 2524   | RASSF7          | 0 | chr11 | 551500    |
| 551     | RASSF7           | 0 | 2024   | RASSF7          | 0 | chr11 | 552000    |
| 198547  | MAD1L1           | 0 | 218609 | MAD1L1          | 0 | chr7  | 2020500   |
| 16835   | PXDN             | 0 | 95798  | PXDN            | 0 | chr2  | 1631500   |
| 33364   | RXRA             | 0 | 80753  | RXRA            | 0 | chr9  | 136391500 |
| -26296  | C2orf27B         | 0 | 319638 | ANKRD30BL       | 0 | chr2  | 132302000 |
| -26796  | C2orf27B         | 0 | 319138 | ANKRD30BL       | 0 | chr2  | 132302500 |
| -27296  | C2orf27B         | 0 | 318638 | ANKRD30BL       | 0 | chr2  | 132303000 |
| -21993  | PDGFA            | 0 | 7912   | PRKAR1B         | 0 | chr7  | 548000    |
| -22493  | PDGFA            | 0 | 7412   | PRKAR1B         | 0 | chr7  | 548500    |
| 759     | C16orf42         | 0 | 1874   | C16orf42        | 0 | chr16 | 1340000   |
| 1259    | C16orf42         | 0 | 1374   | C16orf42        | 0 | chr16 | 1340500   |
| -917    | MFI2             | 0 | 11827  | DLG1            | 0 | chr3  | 198242000 |
| -21049  | IL28B            | 0 | 2496   | IL28A           | 0 | chr19 | 44448500  |
| -122129 | KIAA1267         | 0 | 773    | LRRRC37A        | 0 | chr17 | 41727500  |
| -122629 | KIAA1267         | 0 | 273    | LRRRC37A        | 0 | chr17 | 41728000  |
| 227     | LRRRC37A         | 0 | 42418  | LRRRC37A        | 0 | chr17 | 41728500  |
| -1545   | GMIP             | 0 | 9      | ATP13A1         | 0 | chr19 | 19617000  |
| 25495   | THOP1            | 0 | 2599   | THOP1           | 0 | chr19 | 2762000   |

|         |                   |   |         |               |   |       |           |
|---------|-------------------|---|---------|---------------|---|-------|-----------|
| 25995   | THOP1             | 0 | 2099    | THOP1         | 0 | chr19 | 2762500   |
| 26495   | THOP1             | 0 | 1599    | THOP1         | 0 | chr19 | 2763000   |
| 222     | SPRED3            | 0 | 5711    | SPRED3        | 0 | chr19 | 43573000  |
| 7435    | GIGYF1            | 0 | 2306    | GIGYF1        | 0 | chr7  | 100122500 |
| 7935    | GIGYF1            | 0 | 1806    | GIGYF1        | 0 | chr7  | 100123000 |
| -283569 | GRIK3             | 0 | 156705  | ZC3H12A       | 0 | chr1  | 37556000  |
| 3468    | C3orf27           | 0 | 619     | C3orf27       | 0 | chr3  | 129777000 |
| 3968    | C3orf27           | 0 | 119     | C3orf27       | 0 | chr3  | 129777500 |
| 630026  | AGAP1             | 0 | 1359    | AGAP1         | 0 | chr2  | 236697500 |
| 975     | CPA1              | 0 | 6684    | CPA1          | 0 | chr7  | 129808500 |
| 7881    | GLTSCR2           | 0 | 3627    | GLTSCR2       | 0 | chr19 | 52948500  |
| -10138  | CLCN6             | 0 | 7362    | NPPA          | 0 | chr1  | 11821000  |
| 25248   | GPSM1             | 0 | 6878    | GPSM1         | 0 | chr9  | 138367000 |
| 171     | GPSM1             | 0 | 6378    | GPSM1         | 0 | chr9  | 138367500 |
| 15406   | ZNF488            | 0 | 3374    | ZNF488        | 0 | chr10 | 47990500  |
| 15906   | ZNF488            | 0 | 2874    | ZNF488        | 0 | chr10 | 47991000  |
| 46283   | SIN3B             | 0 | 4664    | SIN3B         | 0 | chr19 | 16847500  |
| 46783   | SIN3B             | 0 | 4164    | SIN3B         | 0 | chr19 | 16848000  |
| 501     | NCRNA00221        | 0 | 12574   | NCRNA00221    | 0 | chr14 | 106010000 |
| 152555  | NFASC             | 0 | 41572   | NFASC         | 0 | chr1  | 203217000 |
| -356    | LOC115110         | 0 | 4650    | TNFRSF14      | 0 | chr1  | 2474500   |
| -57145  | SLC45A4           | 0 | 54829   | LOC731779     | 0 | chr8  | 142365000 |
| -4804   | LOC642852         | 0 | 103024  | COL18A1       | 0 | chr21 | 45546500  |
| -5304   | LOC642852         | 0 | 102524  | COL18A1       | 0 | chr21 | 45547000  |
| -5804   | LOC642852         | 0 | 102024  | COL18A1       | 0 | chr21 | 45547500  |
| 1950    | C9orf173          | 0 | 255     | C9orf173      | 0 | chr9  | 139267500 |
| -245    | C9orf173          | 0 | 1579    | COBRA1        | 0 | chr9  | 139268000 |
| 198     | JAKMIP3           | 0 | 79802   | JAKMIP3       | 0 | chr10 | 133768500 |
| 89142   | KCNT1             | 0 | 1813    | KCNT1         | 0 | chr9  | 137823000 |
| 89642   | KCNT1             | 0 | 1313    | KCNT1         | 0 | chr9  | 137823500 |
| 3153    | ASMT              | 0 | 44474   | ASMT          | 0 | chrX  | 1677500   |
| 3653    | ASMT              | 0 | 43974   | ASMT          | 0 | chrX  | 1678000   |
| 32962   | BANP              | 0 | 92925   | BANP          | 0 | chr16 | 86575500  |
| 337490  | PTPRN2            | 0 | 711243  | PTPRN2        | 0 | chr7  | 157362000 |
| 892     | SQSTM1            | 0 | 30181   | SQSTM1        | 0 | chr5  | 179167500 |
| 751     | HPN               | 0 | 25315   | HPN           | 0 | chr19 | 40224000  |
| 70146   | MYO1E             | 0 | 166363  | MYO1E         | 0 | chr15 | 57286000  |
| 167     | LDHAL6B           | 0 | 1501    | LDHAL6B       | 0 | chr15 | 57286500  |
| 8426    | ID7,JMJD7-PLA2G4B | 0 | 1077    | JMJD7-PLA2G4B | 0 | chr15 | 39916000  |
| 8926    | ID7,JMJD7-PLA2G4B | 0 | 577     | JMJD7-PLA2G4B | 0 | chr15 | 39916500  |
| 9426    | ID7,JMJD7-PLA2G4B | 0 | 77      | JMJD7-PLA2G4B | 0 | chr15 | 39917000  |
| -75474  | GALNT9            | 0 | 30049   | LOC100130238  | 0 | chr12 | 131332000 |
| 18426   | PMS2L11           | 0 | 24512   | PMS2L11       | 0 | chr7  | 76466500  |
| 18926   | PMS2L11           | 0 | 24012   | PMS2L11       | 0 | chr7  | 76467000  |
| 19426   | PMS2L11           | 0 | 23512   | PMS2L11       | 0 | chr7  | 76467500  |
| 2682    | DCAF15            | 0 | 6256    | DCAF15        | 0 | chr19 | 13927000  |
| 3182    | DCAF15            | 0 | 5756    | DCAF15        | 0 | chr19 | 13927500  |
| 3682    | DCAF15            | 0 | 5256    | DCAF15        | 0 | chr19 | 13928000  |
| 34141   | RRP1B             | 0 | 2388    | RRP1B         | 0 | chr21 | 43938000  |
| 34641   | RRP1B             | 0 | 1888    | RRP1B         | 0 | chr21 | 43938500  |
| 749     | PRKCDBP           | 0 | 816     | PRKCDBP       | 0 | chr11 | 6297500   |
| 34450   | FBXW10            | 0 | 887     | FBXW10        | 0 | chr17 | 18622500  |
| 34950   | FBXW10            | 0 | 387     | FBXW10        | 0 | chr17 | 18623000  |
| 26416   | ADPRHL1           | 0 | 4840    | ADPRHL1       | 0 | chr13 | 113151000 |
| 26916   | ADPRHL1           | 0 | 4340    | ADPRHL1       | 0 | chr13 | 113151500 |
| -100586 | SOCS6             | 0 | 2105894 | CBLN2         | 0 | chr18 | 66249000  |
| -165774 | ERICH1            | 0 | 599975  | DLGAP2        | 0 | chr8  | 837000    |
| -166274 | ERICH1            | 0 | 599475  | DLGAP2        | 0 | chr8  | 837500    |

|         |           |   |        |           |   |       |           |
|---------|-----------|---|--------|-----------|---|-------|-----------|
| 6099    | SPTB      | 0 | 50619  | SPTB      | 0 | chr14 | 64309000  |
| 6599    | SPTB      | 0 | 50119  | SPTB      | 0 | chr14 | 64309500  |
| 396281  | RPTOR     | 0 | 25268  | RPTOR     | 0 | chr17 | 76529500  |
| 396781  | RPTOR     | 0 | 24768  | RPTOR     | 0 | chr17 | 76530000  |
| 26588   | PRKAR1B   | 0 | 136159 | PRKAR1B   | 0 | chr7  | 582500    |
| 27088   | PRKAR1B   | 0 | 135659 | PRKAR1B   | 0 | chr7  | 583000    |
| 27588   | PRKAR1B   | 0 | 135159 | PRKAR1B   | 0 | chr7  | 583500    |
| 6482    | PTPRS     | 0 | 128814 | PTPRS     | 0 | chr19 | 5163000   |
| -2670   | PALM      | 0 | 145    | C19orf21  | 0 | chr19 | 702000    |
| -1129   | KLHL38    | 0 | 26714  | ANXA13    | 0 | chr8  | 124735500 |
| -61     | HK3       | 0 | 5611   | UIMC1     | 0 | chr5  | 176259000 |
| -18630  | BAI1      | 0 | 47411  | ARC       | 0 | chr8  | 143642000 |
| -19130  | BAI1      | 0 | 46911  | ARC       | 0 | chr8  | 143642500 |
| 19418   | SHC2      | 0 | 24996  | SHC2      | 0 | chr19 | 387000    |
| 19918   | SHC2      | 0 | 24496  | SHC2      | 0 | chr19 | 387500    |
| 25902   | ACRC      | 0 | 9658   | ACRC      | 0 | chrX  | 70740500  |
| 13916   | LOC146336 | 0 | 732    | LOC146336 | 0 | chr16 | 1068000   |
| 14416   | LOC146336 | 0 | 232    | LOC146336 | 0 | chr16 | 1068500   |
| 378281  | RPTOR     | 0 | 43268  | RPTOR     | 0 | chr17 | 76511500  |
| -17505  | CTDP1     | 0 | 91655  | KCNG2     | 0 | chr18 | 75633000  |
| -18005  | CTDP1     | 0 | 91155  | KCNG2     | 0 | chr18 | 75633500  |
| 463301  | FHOD3     | 0 | 19016  | FHOD3     | 0 | chr18 | 32595000  |
| -61     | CYB561    | 0 | 36165  | ACE       | 0 | chr17 | 58872000  |
| -561    | CYB561    | 0 | 35665  | ACE       | 0 | chr17 | 58872500  |
| -292637 | PITX1     | 0 | 7469   | H2AFY     | 0 | chr5  | 134690500 |
| -293137 | PITX1     | 0 | 6969   | H2AFY     | 0 | chr5  | 134691000 |
| 105     | SLC25A34  | 0 | 4971   | SLC25A34  | 0 | chr1  | 15935500  |
| -755    | C1QTNF8   | 0 | 56241  | CACNA1H   | 0 | chr16 | 1087000   |
| -1255   | C1QTNF8   | 0 | 55741  | CACNA1H   | 0 | chr16 | 1087500   |
| -481    | C10orf125 | 0 | 3976   | ECHS1     | 0 | chr10 | 135022000 |
| -981    | C10orf125 | 0 | 3476   | ECHS1     | 0 | chr10 | 135022500 |
| 1152    | SLC25A11  | 0 | 1563   | SLC25A11  | 0 | chr17 | 4782500   |
| -895    | AKT2      | 0 | 34810  | C19orf47  | 0 | chr19 | 45484000  |
| -1395   | AKT2      | 0 | 34310  | C19orf47  | 0 | chr19 | 45484500  |
| -226417 | HIVEP3    | 0 | 8178   | GUCA2B    | 0 | chr1  | 42383500  |
| -226917 | HIVEP3    | 0 | 7678   | GUCA2B    | 0 | chr1  | 42384000  |
| 228     | PNKP      | 0 | 6130   | PNKP      | 0 | chr19 | 55056500  |
| 2127    | SCN1B     | 0 | 7693   | SCN1B     | 0 | chr19 | 40215500  |
| -97531  | KIAA0087  | 0 | 1514   | C7orf71   | 0 | chr7  | 26642500  |
| -396314 | AQP7P2    | 0 | 7249   | FAM27B    | 0 | chr9  | 67375500  |
| -396814 | AQP7P2    | 0 | 6749   | FAM27B    | 0 | chr9  | 67376000  |
| 28531   | PPP2R3B   | 0 | 24127  | PPP2R3B   | 0 | chrY  | 243500    |
| 29031   | PPP2R3B   | 0 | 23627  | PPP2R3B   | 0 | chrY  | 244000    |
| -925    | HSPA12A   | 0 | 141295 | KIAA1598  | 0 | chr10 | 118493000 |
| 1077    | MUC20     | 0 | 15711  | MUC20     | 0 | chr3  | 196934500 |
| 2571    | KIAA0664  | 0 | 19677  | KIAA0664  | 0 | chr17 | 2542000   |
| 1159    | POLE3     | 0 | 2350   | POLE3     | 0 | chr9  | 115210500 |
| 5704    | SPTBN2    | 0 | 30446  | SPTBN2    | 0 | chr11 | 66215000  |
| 6204    | SPTBN2    | 0 | 29946  | SPTBN2    | 0 | chr11 | 66215500  |
| 6392    | CHRNA4    | 0 | 11639  | CHRNA4    | 0 | chr20 | 61451500  |
| 11677   | MUC6      | 0 | 12206  | MUC6      | 0 | chr11 | 1014500   |
| 12177   | MUC6      | 0 | 11706  | MUC6      | 0 | chr11 | 1015000   |
| 229655  | CLEC16A   | 0 | 8045   | CLEC16A   | 0 | chr16 | 11175500  |
| 5166    | PANK4     | 0 | 12895  | PANK4     | 0 | chr1  | 2435000   |
| 5666    | PANK4     | 0 | 12395  | PANK4     | 0 | chr1  | 2435500   |
| 5850    | UNC93B1   | 0 | 7169   | UNC93B1   | 0 | chr11 | 67521000  |
| 6350    | UNC93B1   | 0 | 6669   | UNC93B1   | 0 | chr11 | 67521500  |
| 2852    | C7orf50   | 0 | 138419 | C7orf50   | 0 | chr7  | 1006000   |

|         |                |   |        |                 |   |       |           |
|---------|----------------|---|--------|-----------------|---|-------|-----------|
| 3352    | C7orf50        | 0 | 137919 | C7orf50         | 0 | chr7  | 1006500   |
| 7317    | BTBD12         | 0 | 23086  | BTBD12          | 0 | chr16 | 3578500   |
| 7817    | BTBD12         | 0 | 22586  | BTBD12          | 0 | chr16 | 3579000   |
| -39144  | GRHL1          | 0 | 2132   | KLF11           | 0 | chr2  | 10099000  |
| -39644  | GRHL1          | 0 | 1632   | KLF11           | 0 | chr2  | 10099500  |
| 93375   | PPP6R2         | 0 | 8380   | PPP6R2          | 0 | chr22 | 49222000  |
| 93875   | PPP6R2         | 0 | 7880   | PPP6R2          | 0 | chr22 | 49222500  |
| 24916   | TECTA          | 0 | 63225  | TECTA           | 0 | chr11 | 120503500 |
| 25416   | TECTA          | 0 | 62725  | TECTA           | 0 | chr11 | 120504000 |
| 338781  | RPTOR          | 0 | 82768  | RPTOR           | 0 | chr17 | 76472000  |
| 339281  | RPTOR          | 0 | 82268  | RPTOR           | 0 | chr17 | 76472500  |
| 9693    | PRMT1          | 0 | 1516   | PRMT1           | 0 | chr19 | 54882000  |
| 53345   | MCF2L          | 0 | 65863  | MCF2L           | 0 | chr13 | 112735000 |
| 53845   | MCF2L          | 0 | 65363  | MCF2L           | 0 | chr13 | 112735500 |
| 54345   | MCF2L          | 0 | 64863  | MCF2L           | 0 | chr13 | 112736000 |
| -21439  | PHF21A         | 0 | 134803 | CREB3L1         | 0 | chr11 | 46121000  |
| -12587  | MRPL23         | 0 | 14015  | LOC100133545    | 0 | chr11 | 1947000   |
| -490    | FAM116B        | 0 | 28125  | PPP6R2          | 0 | chr22 | 49100500  |
| -16416  | TMEM121        | 0 | 370882 | KIAA0125        | 0 | chr14 | 105084000 |
| 41418   | SHC2           | 0 | 2996   | SHC2            | 0 | chr19 | 409000    |
| 41918   | SHC2           | 0 | 2496   | SHC2            | 0 | chr19 | 409500    |
| 77997   | EVL            | 0 | 826    | EVL             | 0 | chr14 | 99679500  |
| 9080    | LRTM1          | 0 | 612    | LRTM1           | 0 | chr3  | 54936500  |
| 9580    | LRTM1          | 0 | 112    | LRTM1           | 0 | chr3  | 54937000  |
| -30563  | LOC401010      | 0 | 635    | TUBA3D          | 0 | chr2  | 131949500 |
| -31063  | LOC401010      | 0 | 135    | TUBA3D          | 0 | chr2  | 131950000 |
| 365     | TUBA3D         | 0 | 6477   | TUBA3D          | 0 | chr2  | 131950500 |
| -170762 | FZD10          | 0 | 1566   | PIWIL1          | 0 | chr12 | 129387000 |
| -171262 | FZD10          | 0 | 1066   | PIWIL1          | 0 | chr12 | 129387500 |
| -36727  | SBNO2          | 0 | 36797  | STK11           | 0 | chr19 | 1120000   |
| -458112 | TBC1D22A       | 0 | 857451 | FAM19A5         | 0 | chr22 | 46406500  |
| 3214    | RAB35          | 0 | 18482  | RAB35           | 0 | chr12 | 119020500 |
| -3033   | IKZF3          | 0 | 980    | ZBP2            | 0 | chr17 | 35277000  |
| -3533   | IKZF3          | 0 | 480    | ZBP2            | 0 | chr17 | 35277500  |
| 41187   | NFATC1         | 0 | 87811  | NFATC1          | 0 | chr18 | 75302500  |
| 67574   | CYTSB          | 0 | 82575  | CYTSB           | 0 | chr17 | 19998500  |
| 68074   | CYTSB          | 0 | 82075  | CYTSB           | 0 | chr17 | 19999000  |
| -53729  | LOC284276      | 0 | 210603 | ZNF236          | 0 | chr18 | 72454500  |
| -54229  | LOC284276      | 0 | 210103 | ZNF236          | 0 | chr18 | 72455000  |
| 621     | SLC25A2        | 0 | 796    | SLC25A2         | 0 | chr5  | 140663000 |
| 1121    | SLC25A2        | 0 | 296    | SLC25A2         | 0 | chr5  | 140663500 |
| 7273    | PTOV1          | 0 | 2311   | PTOV1           | 0 | chr19 | 55053500  |
| -12036  | SLC30A3        | 0 | 292    | DNAJC5G         | 0 | chr2  | 27351500  |
| 208     | DNAJC5G        | 0 | 5800   | DNAJC5G         | 0 | chr2  | 27352000  |
| -4046   | LOC650368      | 0 | 213289 | TRPC2           | 0 | chr11 | 3391000   |
| 9845    | KLHL30         | 0 | 2286   | KLHL30          | 0 | chr2  | 238724000 |
| 3532    | PG4P1Y,CSPG4P: | 0 | 266    | PG4P1Y,CSPG4P2Y | 0 | chrY  | 24742500  |
| -234    | PG4P1Y,CSPG4P: | 0 | 22502  | P3Y,GOLGA2P2Y   | 0 | chrY  | 24743000  |
| -734    | PG4P1Y,CSPG4P: | 0 | 22002  | P3Y,GOLGA2P2Y   | 0 | chrY  | 24743500  |
| 298     | WDR24          | 0 | 5401   | WDR24           | 0 | chr16 | 675000    |
| 6594    | RHOBTB2        | 0 | 13653  | RHOBTB2         | 0 | chr8  | 22920000  |
| 7094    | RHOBTB2        | 0 | 13153  | RHOBTB2         | 0 | chr8  | 22920500  |
| -44547  | ITPRIPL2       | 0 | 2138   | SYT17           | 0 | chr16 | 19085000  |
| -45047  | ITPRIPL2       | 0 | 1638   | SYT17           | 0 | chr16 | 19085500  |
| -38441  | LOC100130238   | 0 | 171229 | FBRSL1          | 0 | chr12 | 131406000 |
| -38941  | LOC100130238   | 0 | 170729 | FBRSL1          | 0 | chr12 | 131406500 |
| 36741   | CARS2          | 0 | 27964  | CARS2           | 0 | chr13 | 110128500 |
| 37241   | CARS2          | 0 | 27464  | CARS2           | 0 | chr13 | 110129000 |

|         |           |   |        |           |   |       |           |
|---------|-----------|---|--------|-----------|---|-------|-----------|
| 37741   | CARS2     | 0 | 26964  | CARS2     | 0 | chr13 | 110129500 |
| -2166   | SMYD3     | 0 | 120990 | TFB2M     | 0 | chr1  | 244649500 |
| -6524   | GLI4      | 0 | 7933   | ZNF696    | 0 | chr8  | 144437000 |
| 32025   | KCNQ2     | 0 | 6937   | KCNQ2     | 0 | chr20 | 61567500  |
| 32525   | KCNQ2     | 0 | 6437   | KCNQ2     | 0 | chr20 | 61568000  |
| 12400   | DENND4B   | 0 | 4778   | DENND4B   | 0 | chr1  | 152181000 |
| 1669    | GGN       | 0 | 2008   | GGN       | 0 | chr19 | 43568500  |
| 498     | CHST1     | 0 | 16248  | CHST1     | 0 | chr11 | 45627500  |
| 998     | CHST1     | 0 | 15748  | CHST1     | 0 | chr11 | 45628000  |
| 1498    | CHST1     | 0 | 15248  | CHST1     | 0 | chr11 | 45628500  |
| 1998    | CHST1     | 0 | 14748  | CHST1     | 0 | chr11 | 45629000  |
| -19330  | SUZ12     | 0 | 767    | LRRC37B   | 0 | chr17 | 27371500  |
| -19830  | SUZ12     | 0 | 267    | LRRC37B   | 0 | chr17 | 27372000  |
| 233     | LRRC37B   | 0 | 32132  | LRRC37B   | 0 | chr17 | 27372500  |
| -28437  | LOC284379 | 0 | 121    | DPRX      | 0 | chr19 | 58827000  |
| 1774    | C17orf107 | 0 | 1506   | C17orf107 | 0 | chr17 | 4745500   |
| 1925    | RHBDL1    | 0 | 268    | RHBDL1    | 0 | chr16 | 668000    |
| 8324    | CPNE7     | 0 | 13154  | CPNE7     | 0 | chr16 | 88178000  |
| 8824    | CPNE7     | 0 | 12654  | CPNE7     | 0 | chr16 | 88178500  |
| -588    | C9        | 0 | 6536   | DAB2      | 0 | chr5  | 39401000  |
| -42814  | FGFRL1    | 0 | 1768   | RNF212    | 0 | chr4  | 1053500   |
| 2056    | CYP2D6    | 0 | 2327   | CYP2D6    | 0 | chr22 | 40854500  |
| 2556    | CYP2D6    | 0 | 1827   | CYP2D6    | 0 | chr22 | 40855000  |
| 3056    | CYP2D6    | 0 | 1327   | CYP2D6    | 0 | chr22 | 40855500  |
| 6510    | TSC2      | 0 | 34214  | TSC2      | 0 | chr16 | 2044500   |
| 7010    | TSC2      | 0 | 33714  | TSC2      | 0 | chr16 | 2045000   |
| 7510    | TSC2      | 0 | 33214  | TSC2      | 0 | chr16 | 2045500   |
| 66962   | BANP      | 0 | 58925  | BANP      | 0 | chr16 | 86609500  |
| -294274 | ERICH1    | 0 | 471475 | DLGAP2    | 0 | chr8  | 965500    |
| 103965  | ANKRD11   | 0 | 118970 | ANKRD11   | 0 | chr16 | 87965500  |
| 4090    | TNXB      | 0 | 64129  | TNXB      | 0 | chr6  | 32121000  |
| 74      | NBPF6     | 0 | 20282  | NBPF6     | 0 | chr1  | 108794500 |
| -24990  | NEU2      | 0 | 279    | INPP5D    | 0 | chr2  | 233633000 |
| -592    | KRT17     | 0 | 63652  | EIF1      | 0 | chr17 | 37035000  |
| -1404   | STIP1     | 0 | 727    | FERMT3    | 0 | chr11 | 63730000  |
| -1904   | STIP1     | 0 | 227    | FERMT3    | 0 | chr11 | 63730500  |
| 314753  | MTUS2     | 0 | 166584 | MTUS2     | 0 | chr13 | 28811500  |
| 3474    | TGFB111   | 0 | 1281   | TGFB111   | 0 | chr16 | 31395500  |
| 3974    | TGFB111   | 0 | 781    | TGFB111   | 0 | chr16 | 31396000  |
| 13018   | PHRF1     | 0 | 22720  | PHRF1     | 0 | chr11 | 579500    |
| 13518   | PHRF1     | 0 | 22220  | PHRF1     | 0 | chr11 | 580000    |
| 41554   | CCDC144B  | 0 | 570    | CCDC144B  | 0 | chr17 | 18469000  |
| 42054   | CCDC144B  | 0 | 70     | CCDC144B  | 0 | chr17 | 18469500  |
| 13072   | MSLNL     | 0 | 427    | MSLNL     | 0 | chr16 | 772500    |
| 39527   | MUC5AC    | 0 | 73302  | MUC5AC    | 0 | chr11 | 1172000   |
| 40027   | MUC5AC    | 0 | 72802  | MUC5AC    | 0 | chr11 | 1172500   |
| 36965   | ANKRD11   | 0 | 185970 | ANKRD11   | 0 | chr16 | 87898500  |
| 16637   | WDR90     | 0 | 1830   | WDR90     | 0 | chr16 | 656000    |
| 17137   | WDR90     | 0 | 1330   | WDR90     | 0 | chr16 | 656500    |
| 94547   | MAD1L1    | 0 | 322609 | MAD1L1    | 0 | chr7  | 1916500   |
| 95047   | MAD1L1    | 0 | 322109 | MAD1L1    | 0 | chr7  | 1917000   |
| 3360    | IRF3      | 0 | 2944   | IRF3      | 0 | chr19 | 54858000  |
| 3860    | IRF3      | 0 | 2444   | IRF3      | 0 | chr19 | 54858500  |
| 7826    | C16orf88  | 0 | 3993   | C16orf88  | 0 | chr16 | 19633000  |
| -96385  | FAM92B    | 0 | 402529 | KIAA0182  | 0 | chr16 | 83800000  |
| 2904    | EFNB2     | 0 | 42338  | EFNB2     | 0 | chr13 | 105943000 |
| 3404    | EFNB2     | 0 | 41838  | EFNB2     | 0 | chr13 | 105943500 |
| -181    | BOLL      | 0 | 19277  | PLCL1     | 0 | chr2  | 198358500 |

|          |                |   |        |                |   |       |           |
|----------|----------------|---|--------|----------------|---|-------|-----------|
| 93661    | DYSF           | 0 | 126400 | DYSF           | 0 | chr2  | 71641000  |
| 39907    | KIF17          | 0 | 13904  | KIF17          | 0 | chr1  | 20903000  |
| 15219    | KDM2B          | 0 | 136247 | KDM2B          | 0 | chr12 | 120366500 |
| 15719    | KDM2B          | 0 | 135747 | KDM2B          | 0 | chr12 | 120367000 |
| 11616    | WNT4           | 0 | 14106  | WNT4           | 0 | chr1  | 22328000  |
| 12116    | WNT4           | 0 | 13606  | WNT4           | 0 | chr1  | 22328500  |
| 126756   | JAK2           | 0 | 16182  | JAK2           | 0 | chr9  | 5102000   |
| 4907     | CLDN15         | 0 | 836    | CLDN15         | 0 | chr7  | 100667000 |
| -856     | LOC115110      | 0 | 4150   | TNFRSF14       | 0 | chr1  | 2475000   |
| -1297916 | GALR1          | 0 | 432262 | SALL3          | 0 | chr18 | 74409000  |
| 5148     | HLA-DQB2       | 0 | 2308   | HLA-DQB2       | 0 | chr6  | 32837000  |
| 5648     | HLA-DQB2       | 0 | 1808   | HLA-DQB2       | 0 | chr6  | 32837500  |
| 29979    | ZFR2           | 0 | 35027  | ZFR2           | 0 | chr19 | 3785000   |
| 30479    | ZFR2           | 0 | 34527  | ZFR2           | 0 | chr19 | 3785500   |
| 16284    | NOTCH1         | 0 | 35059  | NOTCH1         | 0 | chr9  | 138525000 |
| 121      | CNTD1          | 0 | 12631  | CNTD1          | 0 | chr17 | 38204500  |
| 48332    | RAB11FIP3      | 0 | 48481  | RAB11FIP3      | 0 | chr16 | 464000    |
| 48832    | RAB11FIP3      | 0 | 47981  | RAB11FIP3      | 0 | chr16 | 464500    |
| 150      | RAB11FIP3      | 0 | 47481  | RAB11FIP3      | 0 | chr16 | 465000    |
| 21088    | PRKAR1B        | 0 | 141659 | PRKAR1B        | 0 | chr7  | 577000    |
| 21588    | PRKAR1B        | 0 | 141159 | PRKAR1B        | 0 | chr7  | 577500    |
| 22088    | PRKAR1B        | 0 | 140659 | PRKAR1B        | 0 | chr7  | 578000    |
| -136845  | C2orf85        | 0 | 78516  | LOC728323      | 0 | chr2  | 242601000 |
| -969     | C21orf84       | 0 | 49999  | HSF2BP         | 0 | chr21 | 43723500  |
| 11900    | SBF1           | 0 | 16320  | SBF1           | 0 | chr22 | 49244000  |
| 13400    | SBF1           | 0 | 14820  | SBF1           | 0 | chr22 | 49245500  |
| 15701    | THBS2          | 0 | 22562  | THBS2          | 0 | chr6  | 169373500 |
| -20570   | UVRAG          | 0 | 21517  | WNT11          | 0 | chr11 | 75553500  |
| -21070   | UVRAG          | 0 | 21017  | WNT11          | 0 | chr11 | 75554000  |
| 23782    | FLNC           | 0 | 5064   | FLNC           | 0 | chr7  | 128281500 |
| 64874    | VIPR2          | 0 | 51910  | VIPR2          | 0 | chr7  | 158578500 |
| 65374    | VIPR2          | 0 | 51410  | VIPR2          | 0 | chr7  | 158579000 |
| -2212    | 20B,PRR20A,PRR | 0 | 1331   | ,PRR20D,PRR20E | 0 | chr13 | 56638000  |
| -2712    | 20B,PRR20A,PRR | 0 | 831    | ,PRR20D,PRR20E | 0 | chr13 | 56638500  |
| -3212    | 20B,PRR20A,PRR | 0 | 331    | ,PRR20D,PRR20E | 0 | chr13 | 56639000  |
| 169      | 20B,PRR20C,PRR | 0 | 2853   | ,PRR20D,PRR20E | 0 | chr13 | 56639500  |
| -338     | KRT34          | 0 | 11002  | KRT31          | 0 | chr17 | 36792500  |
| 14607    | PRDM15         | 0 | 63660  | PRDM15         | 0 | chr21 | 42109000  |
| -30682   | C19orf21       | 0 | 2391   | PTBP1          | 0 | chr19 | 746000    |
| 5417     | NFIX           | 0 | 97610  | NFIX           | 0 | chr19 | 12973000  |
| -927     | CTRB2          | 0 | 10884  | CTRB1          | 0 | chr16 | 73799500  |
| -1427    | CTRB2          | 0 | 10384  | CTRB1          | 0 | chr16 | 73800000  |
| 45819    | PIP5K1C        | 0 | 24445  | PIP5K1C        | 0 | chr19 | 3627000   |
| 46319    | PIP5K1C        | 0 | 23945  | PIP5K1C        | 0 | chr19 | 3627500   |
| 15093    | GNA11          | 0 | 11954  | GNA11          | 0 | chr19 | 3060500   |
| 15593    | GNA11          | 0 | 11454  | GNA11          | 0 | chr19 | 3061000   |
| -27888   | GAB4           | 0 | 459    | CECR7          | 0 | chr22 | 15897000  |
| 1063     | MAFG           | 0 | 4201   | MAFG           | 0 | chr17 | 77470500  |
| 11134    | SH3GL1         | 0 | 28971  | SH3GL1         | 0 | chr19 | 4322500   |
| 91205    | RASA3          | 0 | 59697  | RASA3          | 0 | chr13 | 113856500 |
| 91705    | RASA3          | 0 | 59197  | RASA3          | 0 | chr13 | 113857000 |
| 85       | KRT86          | 0 | 7214   | KRT86          | 0 | chr12 | 50982000  |
| 45489    | COLEC11        | 0 | 3922   | COLEC11        | 0 | chr2  | 3666000   |
| 505      | CAV3           | 0 | 12451  | CAV3           | 0 | chr3  | 8751000   |
| 9052     | PSME3          | 0 | 1303   | PSME3          | 0 | chr17 | 38248000  |
| 79857    | ATP11A         | 0 | 116983 | ATP11A         | 0 | chr13 | 112472500 |
| 80357    | ATP11A         | 0 | 116483 | ATP11A         | 0 | chr13 | 112473000 |
| -5380    | NFKBIL2        | 0 | 122    | CYHR1          | 0 | chr8  | 145646000 |

|          |          |   |         |           |   |       |           |
|----------|----------|---|---------|-----------|---|-------|-----------|
| 378      | CYHR1    | 0 | 14726   | CYHR1     | 0 | chr8  | 145646500 |
| 2940     | WDR1     | 0 | 39671   | WDR1      | 0 | chr4  | 9688000   |
| 3440     | WDR1     | 0 | 39171   | WDR1      | 0 | chr4  | 9688500   |
| 74491    | ABR      | 0 | 109366  | ABR       | 0 | chr17 | 928000    |
| -1475916 | GALR1    | 0 | 254262  | SALL3     | 0 | chr18 | 74587000  |
| -1535    | OGT      | 0 | 598     | ACRC      | 0 | chrX  | 70714000  |
| -16134   | WISP2    | 0 | 1901    | KCNK15    | 0 | chr20 | 42806000  |
| -16634   | WISP2    | 0 | 1401    | KCNK15    | 0 | chr20 | 42806500  |
| -247385  | FAM92B   | 0 | 251529  | KIAA0182  | 0 | chr16 | 83951000  |
| -247885  | FAM92B   | 0 | 251029  | KIAA0182  | 0 | chr16 | 83951500  |
| -178338  | MGC45800 | 0 | 1130    | ODZ3      | 0 | chr4  | 183481000 |
| 38329    | MAEA     | 0 | 11925   | MAEA      | 0 | chr4  | 1312000   |
| -17961   | STON1    | 0 | 951     | GTF2A1L   | 0 | chr2  | 48697500  |
| -18461   | STON1    | 0 | 451     | GTF2A1L   | 0 | chr2  | 48698000  |
| 49       | GTF2A1L  | 0 | 61750   | GTF2A1L   | 0 | chr2  | 48698500  |
| 24128    | PLEKHG4B | 0 | 25587   | PLEKHG4B  | 0 | chr5  | 217500    |
| 24628    | PLEKHG4B | 0 | 25087   | PLEKHG4B  | 0 | chr5  | 218000    |
| 728      | GPT      | 0 | 2363    | GPT       | 0 | chr8  | 145701000 |
| -99592   | CALCA    | 0 | 1721    | CALCB     | 0 | chr11 | 15050000  |
| -100092  | CALCA    | 0 | 1221    | CALCB     | 0 | chr11 | 15050500  |
| 2215     | FAM78A   | 0 | 16227   | FAM78A    | 0 | chr9  | 133125500 |
| 2715     | FAM78A   | 0 | 15727   | FAM78A    | 0 | chr9  | 133126000 |
| 57457    | AGPAT3   | 0 | 64903   | AGPAT3    | 0 | chr21 | 44167000  |
| 57957    | AGPAT3   | 0 | 64403   | AGPAT3    | 0 | chr21 | 44167500  |
| 16107    | MMP17    | 0 | 7269    | MMP17     | 0 | chr12 | 130895000 |
| 16607    | MMP17    | 0 | 6769    | MMP17     | 0 | chr12 | 130895500 |
| -341     | SLC26A9  | 0 | 141033  | FAM72A    | 0 | chr1  | 204164500 |
| 2198     | CCDC17   | 0 | 1816    | CCDC17    | 0 | chr1  | 45860500  |
| 2698     | CCDC17   | 0 | 1316    | CCDC17    | 0 | chr1  | 45861000  |
| -23957   | FLJ40292 | 0 | 89061   | CACNA1B   | 0 | chr9  | 139803000 |
| 1422     | ST8SIA5  | 0 | 76537   | ST8SIA5   | 0 | chr18 | 42514500  |
| 68142    | KCNT1    | 0 | 22813   | KCNT1     | 0 | chr9  | 137802000 |
| 68642    | KCNT1    | 0 | 22313   | KCNT1     | 0 | chr9  | 137802500 |
| 18337    | GNAS     | 0 | 1145    | GNAS      | 0 | chr20 | 56918500  |
| -281624  | FLJ35776 | 0 | 1264671 | LOC642597 | 0 | chr18 | 3869000   |
| -7245    | DCAF12   | 0 | 45010   | UBAP1     | 0 | chr9  | 34124000  |
| -7745    | DCAF12   | 0 | 44510   | UBAP1     | 0 | chr9  | 34124500  |
| -32712   | MLYCD    | 0 | 172     | OSGIN1    | 0 | chr16 | 82540000  |
| 25593    | SPIRE2   | 0 | 17228   | SPIRE2    | 0 | chr16 | 88448000  |
| 26093    | SPIRE2   | 0 | 16728   | SPIRE2    | 0 | chr16 | 88448500  |
| -1051    | EEF1A2   | 0 | 20576   | PPDPF     | 0 | chr20 | 61602000  |
| -1551    | EEF1A2   | 0 | 20076   | PPDPF     | 0 | chr20 | 61602500  |
| 747      | C19orf76 | 0 | 1559    | C19orf76  | 0 | chr19 | 54884500  |
| -699280  | TP53TG3  | 0 | 389802  | UBE2MP1   | 0 | chr16 | 33871500  |
| -699780  | TP53TG3  | 0 | 389302  | UBE2MP1   | 0 | chr16 | 33872000  |
| 52781    | ZDHHC11  | 0 | 2601    | ZDHHC11   | 0 | chr5  | 901500    |
| -1329    | CIRBP    | 0 | 1019    | C19orf24  | 0 | chr19 | 1225500   |
| -666     | NTAN1    | 0 | 3379    | RRN3      | 0 | chr16 | 15058000  |
| -1166    | NTAN1    | 0 | 2879    | RRN3      | 0 | chr16 | 15058500  |
| -27597   | TPTE2    | 0 | 69379   | MPHOSPH8  | 0 | chr13 | 19036500  |
| -28097   | TPTE2    | 0 | 68879   | MPHOSPH8  | 0 | chr13 | 19037000  |
| 24539    | DNAJC5   | 0 | 14339   | DNAJC5    | 0 | chr20 | 62021500  |
| 25039    | DNAJC5   | 0 | 13839   | DNAJC5    | 0 | chr20 | 62022000  |
| 40540    | KNDC1    | 0 | 25406   | KNDC1     | 0 | chr10 | 134864500 |
| 41040    | KNDC1    | 0 | 24906   | KNDC1     | 0 | chr10 | 134865000 |
| -836     | DFNA5    | 0 | 37688   | OSBPL3    | 0 | chr7  | 24765000  |
| 10569    | ATAD3C   | 0 | 9901    | ATAD3C    | 0 | chr1  | 1385500   |
| 11069    | ATAD3C   | 0 | 9401    | ATAD3C    | 0 | chr1  | 1386000   |



|         |              |   |        |           |   |       |           |
|---------|--------------|---|--------|-----------|---|-------|-----------|
| 13155   | PLIN3        | 0 | 16176  | PLIN3     | 0 | chr19 | 4802500   |
| 13655   | PLIN3        | 0 | 15676  | PLIN3     | 0 | chr19 | 4803000   |
| 21959   | LPCAT1       | 0 | 40576  | LPCAT1    | 0 | chr5  | 1536500   |
| 22459   | LPCAT1       | 0 | 40076  | LPCAT1    | 0 | chr5  | 1537000   |
| -13578  | ZBTB1        | 0 | 1938   | HSPA2     | 0 | chr14 | 64075000  |
| 306     | KRTAP17-1    | 0 | 473    | KRTAP17-1 | 0 | chr17 | 36725000  |
| 219     | GGTLC2       | 0 | 1368   | GGTLC2    | 0 | chr22 | 21319000  |
| -553050 | FOXO2        | 0 | 107973 | SKINTL    | 0 | chr1  | 48232000  |
| -553550 | FOXO2        | 0 | 107473 | SKINTL    | 0 | chr1  | 48232500  |
| -1849   | TTY23B,TTY23 | 0 | 763    | TSPY2     | 0 | chrY  | 6173500   |
| -2349   | TTY23B,TTY23 | 0 | 263    | TSPY2     | 0 | chrY  | 6174000   |
| 7531    | PPP2R3B      | 0 | 45127  | PPP2R3B   | 0 | chrY  | 222500    |
| 8031    | PPP2R3B      | 0 | 44627  | PPP2R3B   | 0 | chrY  | 223000    |
| 67037   | PCNT         | 0 | 54610  | PCNT      | 0 | chr21 | 46635500  |
| 29345   | MCF2L        | 0 | 89863  | MCF2L     | 0 | chr13 | 112711000 |
| 29845   | MCF2L        | 0 | 89363  | MCF2L     | 0 | chr13 | 112711500 |
| -941    | PIK3R5       | 0 | 108083 | NTN1      | 0 | chr17 | 8757500   |
| 1372    | SPPL2B       | 0 | 25100  | SPPL2B    | 0 | chr19 | 2281000   |
| 1872    | SPPL2B       | 0 | 24600  | SPPL2B    | 0 | chr19 | 2281500   |
| -61990  | TPPP         | 0 | 40219  | ZDHC11    | 0 | chr5  | 808500    |
| -62490  | TPPP         | 0 | 39719  | ZDHC11    | 0 | chr5  | 809000    |
| 1755    | NEU4         | 0 | 4907   | NEU4      | 0 | chr2  | 242402500 |
| 2255    | NEU4         | 0 | 4407   | NEU4      | 0 | chr2  | 242403000 |
| 1033    | ZC3H3        | 0 | 102763 | ZC3H3     | 0 | chr8  | 144592000 |
| 1533    | ZC3H3        | 0 | 102263 | ZC3H3     | 0 | chr8  | 144592500 |
| -990    | LY6D         | 0 | 47218  | GML       | 0 | chr8  | 143866000 |
| 11933   | E4F1         | 0 | 244    | E4F1      | 0 | chr16 | 2225500   |
| 6090    | XAB2         | 0 | 3939   | XAB2      | 0 | chr19 | 7596500   |
| 6590    | XAB2         | 0 | 3439   | XAB2      | 0 | chr19 | 7597000   |
| 6468    | MYBPC3       | 0 | 14829  | MYBPC3    | 0 | chr11 | 47316000  |
| 6968    | MYBPC3       | 0 | 14329  | MYBPC3    | 0 | chr11 | 47316500  |
| -1251   | KCNN4        | 0 | 13418  | LYPD5     | 0 | chr19 | 48978500  |
| -53681  | FRA10AC1     | 0 | 1555   | LG1       | 0 | chr10 | 95506000  |
| -54181  | FRA10AC1     | 0 | 1055   | LG1       | 0 | chr10 | 95506500  |
| 12      | ACOT11       | 0 | 62088  | ACOT11    | 0 | chr1  | 54786500  |
| 8142    | IRGQ         | 0 | 3627   | IRGQ      | 0 | chr19 | 48788500  |
| 8642    | IRGQ         | 0 | 3127   | IRGQ      | 0 | chr19 | 48789000  |
| 290757  | TMEM132C     | 0 | 2416   | TMEM132C  | 0 | chr12 | 127756000 |
| 1727    | LOC340508    | 0 | 4548   | LOC340508 | 0 | chr9  | 98879500  |
| -46990  | LY6D         | 0 | 1218   | GML       | 0 | chr8  | 143912000 |
| 6275    | PNPLA7       | 0 | 84307  | PNPLA7    | 0 | chr9  | 139480500 |
| 6775    | PNPLA7       | 0 | 83807  | PNPLA7    | 0 | chr9  | 139481000 |
| 7783    | CSPG4        | 0 | 30744  | CSPG4     | 0 | chr15 | 73761500  |
| 8283    | CSPG4        | 0 | 30244  | CSPG4     | 0 | chr15 | 73762000  |
| 158005  | SHROOM2      | 0 | 4981   | SHROOM2   | 0 | chrX  | 9872500   |
| 158505  | SHROOM2      | 0 | 4481   | SHROOM2   | 0 | chrX  | 9873000   |
| 10783   | ASB10        | 0 | 1352   | ASB10     | 0 | chr7  | 150514500 |
| 872     | ARL16        | 0 | 1859   | ARL16     | 0 | chr17 | 77259500  |
| 21076   | BPHL         | 0 | 13429  | BPHL      | 0 | chr6  | 3085000   |
| 21576   | BPHL         | 0 | 12929  | BPHL      | 0 | chr6  | 3085500   |
| -42113  | GTPBP6       | 0 | 1969   | PPP2R3B   | 0 | chrX  | 213000    |
| 14645   | METRNL       | 0 | 511    | METRNL    | 0 | chr17 | 78645500  |
| 15145   | METRNL       | 0 | 11     | METRNL    | 0 | chr17 | 78646000  |
| 1114    | C17orf70     | 0 | 11348  | C17orf70  | 0 | chr17 | 77118500  |
| 8082    | TRIM3        | 0 | 17281  | TRIM3     | 0 | chr11 | 6434500   |
| -2455   | MUC4         | 0 | 48632  | TNK2      | 0 | chr3  | 197026000 |
| 43741   | PAK4         | 0 | 9886   | PAK4      | 0 | chr19 | 44352000  |
| 28179   | ATXN1        | 0 | 434200 | ATXN1     | 0 | chr6  | 16435500  |

|         |               |   |        |           |   |       |           |
|---------|---------------|---|--------|-----------|---|-------|-----------|
| 28679   | ATXN1         | 0 | 433700 | ATXN1     | 0 | chr6  | 16436000  |
| -47990  | LY6D          | 0 | 218    | GML       | 0 | chr8  | 143913000 |
| 27179   | ATXN1         | 0 | 435200 | ATXN1     | 0 | chr6  | 16434500  |
| 13759   | CACNA1H       | 0 | 54773  | CACNA1H   | 0 | chr16 | 1157000   |
| -3083   | MUC2          | 0 | 34973  | MUC5AC    | 0 | chr11 | 1097500   |
| -3583   | MUC2          | 0 | 34473  | MUC5AC    | 0 | chr11 | 1098000   |
| 4130    | DTX3          | 0 | 850    | DTX3      | 0 | chr12 | 56289000  |
| 4630    | DTX3          | 0 | 350    | DTX3      | 0 | chr12 | 56289500  |
| -967    | LAIR1         | 0 | 48946  | TTYH1     | 0 | chr19 | 59569500  |
| -9245   | PGA4          | 0 | 244    | PGA5      | 0 | chr11 | 60765000  |
| 256     | PGA5          | 0 | 9991   | PGA5      | 0 | chr11 | 60765500  |
| -6106   | DNAJB6        | 0 | 115510 | PTPRN2    | 0 | chr7  | 156909000 |
| -6606   | DNAJB6        | 0 | 115010 | PTPRN2    | 0 | chr7  | 156909500 |
| 3210    | ELANE         | 0 | 746    | ELANE     | 0 | chr19 | 806500    |
| 24565   | NLGN3         | 0 | 1776   | NLGN3     | 0 | chrX  | 70306000  |
| 25065   | NLGN3         | 0 | 1276   | NLGN3     | 0 | chrX  | 70306500  |
| -1660   | YDJC          | 0 | 1085   | CCDC116   | 0 | chr22 | 20316000  |
| 103505  | SHROOM2       | 0 | 59481  | SHROOM2   | 0 | chrX  | 9818000   |
| 104005  | SHROOM2       | 0 | 58981  | SHROOM2   | 0 | chrX  | 9818500   |
| 104505  | SHROOM2       | 0 | 58481  | SHROOM2   | 0 | chrX  | 9819000   |
| 13995   | THOP1         | 0 | 14099  | THOP1     | 0 | chr19 | 2750500   |
| 11681   | MAP2K2        | 0 | 22126  | MAP2K2    | 0 | chr19 | 4053000   |
| -63130  | PEX10         | 0 | 613    | PLCH2     | 0 | chr1  | 2397000   |
| 176528  | COL5A1        | 0 | 26509  | COL5A1    | 0 | chr9  | 136850000 |
| 15776   | DEAF1         | 0 | 35740  | DEAF1     | 0 | chr11 | 650000    |
| 16276   | DEAF1         | 0 | 35240  | DEAF1     | 0 | chr11 | 650500    |
| 378     | CHTF18        | 0 | 9075   | CHTF18    | 0 | chr16 | 779000    |
| 878     | CHTF18        | 0 | 8575   | CHTF18    | 0 | chr16 | 779500    |
| -1619   | THUMPD2       | 0 | 331289 | SLC8A1    | 0 | chr2  | 39861500  |
| 20154   | RPL23AP53     | 0 | 3818   | RPL23AP53 | 0 | chr8  | 168500    |
| 20654   | RPL23AP53     | 0 | 3318   | RPL23AP53 | 0 | chr8  | 169000    |
| 23319   | PIP5K1C       | 0 | 46945  | PIP5K1C   | 0 | chr19 | 3604500   |
| -33255  | C1QTNF8       | 0 | 23741  | CACNA1H   | 0 | chr16 | 1119500   |
| -453    | GCK           | 0 | 11102  | YKT6      | 0 | chr7  | 44196000  |
| 6866    | ZNF213        | 0 | 805    | ZNF213    | 0 | chr16 | 3132000   |
| 7366    | ZNF213        | 0 | 305    | ZNF213    | 0 | chr16 | 3132500   |
| 7314    | PI16          | 0 | 3091   | PI16      | 0 | chr6  | 37037500  |
| 7814    | PI16          | 0 | 2591   | PI16      | 0 | chr6  | 37038000  |
| 52986   | ZFPM1         | 0 | 28575  | ZFPM1     | 0 | chr16 | 87100500  |
| -863905 | C13orf16      | 0 | 111413 | SOX1      | 0 | chr13 | 111658500 |
| -227887 | RD20A3,ANKRD2 | 0 | 582063 | PGM5P2    | 0 | chr9  | 67788000  |
| -18278  | LOC254559     | 0 | 54643  | RHCG      | 0 | chr15 | 87761000  |
| -1369   | ICMT          | 0 | 6848   | HES3      | 0 | chr1  | 6220000   |
| -1869   | ICMT          | 0 | 6348   | HES3      | 0 | chr1  | 6220500   |
| 7131    | GALNT9        | 0 | 2526   | GALNT9    | 0 | chr12 | 131254000 |
| -25701  | WNT9A         | 0 | 33374  | WNT3A     | 0 | chr1  | 226228000 |
| 1694    | PRPF38A       | 0 | 12080  | PRPF38A   | 0 | chr1  | 52644500  |
| 2194    | PRPF38A       | 0 | 11580  | PRPF38A   | 0 | chr1  | 52645000  |
| 7869    | GDPD3         | 0 | 879    | GDPD3     | 0 | chr16 | 30031500  |
| 500     | NTN3          | 0 | 2147   | NTN3      | 0 | chr16 | 2462000   |
| 73369   | DIP2C         | 0 | 342108 | DIP2C     | 0 | chr10 | 383500    |
| 832     | C8orf51       | 0 | 1180   | C8orf51   | 0 | chr8  | 144521000 |
| 245490  | PTPRN2        | 0 | 803243 | PTPRN2    | 0 | chr7  | 157270000 |
| 245990  | PTPRN2        | 0 | 802743 | PTPRN2    | 0 | chr7  | 157270500 |
| -20092  | CDC7          | 0 | 89155  | HSP90B3P  | 0 | chr1  | 91784000  |
| -20592  | CDC7          | 0 | 88655  | HSP90B3P  | 0 | chr1  | 91784500  |
| 32916   | ARHGAP22      | 0 | 126144 | ARHGAP22  | 0 | chr10 | 49357000  |
| -25293  | UPK1A         | 0 | 9169   | ZBTB32    | 0 | chr19 | 40886500  |

|         |           |     |        |           |   |       |           |
|---------|-----------|-----|--------|-----------|---|-------|-----------|
| -25793  | UPK1A     | 0   | 8669   | ZBTB32    | 0 | chr19 | 40887000  |
| 23065   | LOC654342 | 0   | 202    | LOC654342 | 0 | chr2  | 91211500  |
| 366     | DNAJB3    | 0   | 900    | DNAJB3    | 0 | chr2  | 234316500 |
| -2952   | C19orf34  | 0   | 27946  | BTBD2     | 0 | chr19 | 1908500   |
| -3452   | C19orf34  | 0   | 27446  | BTBD2     | 0 | chr19 | 1909000   |
| -9023   | GPER      | 0   | 50069  | ZFAND2A   | 0 | chr7  | 1109000   |
| 38242   | C20orf117 | 0   | 44190  | C20orf117 | 0 | chr20 | 34877500  |
| 17965   | ANKRD11   | 0   | 204970 | ANKRD11   | 0 | chr16 | 87879500  |
| 18465   | ANKRD11   | 0   | 204470 | ANKRD11   | 0 | chr16 | 87880000  |
| 18965   | ANKRD11   | 0   | 203970 | ANKRD11   | 0 | chr16 | 87880500  |
| ---     | ---       | --- | 6293   | RPH3AL    | 0 | chr17 | 56000     |
| ---     | ---       | --- | 5793   | RPH3AL    | 0 | chr17 | 56500     |
| -101058 | POTEG     | 0   | 297953 | POTEM     | 0 | chr14 | 18756000  |
| -101558 | POTEG     | 0   | 297453 | POTEM     | 0 | chr14 | 18756500  |
| -102058 | POTEG     | 0   | 296953 | POTEM     | 0 | chr14 | 18757000  |
| 6618    | PRIC285   | 0   | 9536   | PRIC285   | 0 | chr20 | 61666500  |
| 7118    | PRIC285   | 0   | 9036   | PRIC285   | 0 | chr20 | 61667000  |
| -88186  | TMEM211   | 0   | 440    | KIAA1671  | 0 | chr22 | 23753500  |
| 6644    | CASZ1     | 0   | 142794 | CASZ1     | 0 | chr1  | 10636500  |
| 9347    | CAMSAP1   | 0   | 89326  | CAMSAP1   | 0 | chr9  | 137849500 |
| 9847    | CAMSAP1   | 0   | 88826  | CAMSAP1   | 0 | chr9  | 137850000 |
| 3784    | NOTCH1    | 0   | 47559  | NOTCH1    | 0 | chr9  | 138512500 |
| 4284    | NOTCH1    | 0   | 47059  | NOTCH1    | 0 | chr9  | 138513000 |
| 4784    | NOTCH1    | 0   | 46559  | NOTCH1    | 0 | chr9  | 138513500 |
| 29252   | PIAS4     | 0   | 1067   | PIAS4     | 0 | chr19 | 3988000   |
| 29752   | PIAS4     | 0   | 567    | PIAS4     | 0 | chr19 | 3988500   |
| 30252   | PIAS4     | 0   | 67     | PIAS4     | 0 | chr19 | 3989000   |
| -433    | PIAS4     | 0   | 6715   | ZBTB7A    | 0 | chr19 | 3989500   |
| 4716    | XAGE3     | 0   | 844    | XAGE3     | 0 | chrX  | 52913000  |
| 5216    | XAGE3     | 0   | 344    | XAGE3     | 0 | chrX  | 52913500  |
| -156    | XAGE3     | 0   | 30586  | FAM156A   | 0 | chrX  | 52914000  |
| 7618    | PRIC285   | 0   | 8536   | PRIC285   | 0 | chr20 | 61667500  |
| -946070 | FAM75A7   | 0   | 38588  | LOC442421 | 0 | chr9  | 66195500  |
| -946570 | FAM75A7   | 0   | 38088  | LOC442421 | 0 | chr9  | 66196000  |
| 2587    | TBC1D16   | 0   | 93242  | TBC1D16   | 0 | chr17 | 75531000  |
| 3087    | TBC1D16   | 0   | 92742  | TBC1D16   | 0 | chr17 | 75531500  |
| -48331  | ---       | 0   | 2217   | SFTPA1    | 0 | chr10 | 81038500  |
| -19294  | MUC6      | 0   | 18874  | MUC2      | 0 | chr11 | 1046000   |
| -19794  | MUC6      | 0   | 18374  | MUC2      | 0 | chr11 | 1046500   |
| 3724    | TMEM8A    | 0   | 7451   | TMEM8A    | 0 | chr16 | 364500    |
| -1254   | OTOS      | 0   | 293787 | GPC1      | 0 | chr2  | 240730000 |
| 17531   | PPP2R3B   | 0   | 35127  | PPP2R3B   | 0 | chrX  | 232500    |
| -108    | CD164L2   | 0   | 9238   | GPR3      | 0 | chr1  | 27582500  |
| 27135   | AGRN      | 0   | 8855   | AGRN      | 0 | chr1  | 972500    |
| -19016  | ZNF480    | 0   | 493    | ZNF610    | 0 | chr19 | 57540000  |
| 7       | ZNF610    | 0   | 21423  | ZNF610    | 0 | chr19 | 57540500  |
| 9467    | ANO8      | 0   | 2138   | ANO8      | 0 | chr19 | 17304500  |
| 35007   | AP3D1     | 0   | 15556  | AP3D1     | 0 | chr19 | 2087000   |
| 16356   | ZNF331    | 0   | 25835  | ZNF331    | 0 | chr19 | 58749500  |
| 8017    | OBSCN     | 0   | 145074 | OBSCN     | 0 | chr1  | 226470500 |
| 3063    | PVR       | 0   | 19266  | PVR       | 0 | chr19 | 49842000  |
| 10932   | CNKSRI    | 0   | 1462   | CNKSRI    | 0 | chr1  | 26387500  |
| -7217   | B3GALT6   | 0   | 195    | FAM132A   | 0 | chr1  | 1167500   |
| 305     | FAM132A   | 0   | 3965   | FAM132A   | 0 | chr1  | 1168000   |
| 7714    | GJB1      | 0   | 2290   | GJB1      | 0 | chrX  | 70359500  |
| -264777 | RASSF10   | 0   | 1900   | ARNTL     | 0 | chr11 | 13254000  |
| -265277 | RASSF10   | 0   | 1400   | ARNTL     | 0 | chr11 | 13254500  |
| 35545   | FOXK1     | 0   | 53600  | FOXK1     | 0 | chr7  | 4724000   |

|          |              |   |        |             |   |       |           |
|----------|--------------|---|--------|-------------|---|-------|-----------|
| 36045    | FO XK1       | 0 | 53100  | FO XK1      | 0 | chr7  | 4724500   |
| 29588    | PRKD2        | 0 | 13224  | PRKD2       | 0 | chr19 | 51899000  |
| 30088    | PRKD2        | 0 | 12724  | PRKD2       | 0 | chr19 | 51899500  |
| -1232    | C1orf111     | 0 | 819    | C1orf226    | 0 | chr1  | 160614500 |
| -1732    | C1orf111     | 0 | 319    | C1orf226    | 0 | chr1  | 160615000 |
| 5107     | CANT1        | 0 | 12933  | CANT1       | 0 | chr17 | 74504500  |
| 5607     | CANT1        | 0 | 12433  | CANT1       | 0 | chr17 | 74505000  |
| -110441  | LOC100130238 | 0 | 99229  | FBRSL1      | 0 | chr12 | 131478000 |
| -110941  | LOC100130238 | 0 | 98729  | FBRSL1      | 0 | chr12 | 131478500 |
| 25547    | FBXL18       | 0 | 12425  | FBXL18      | 0 | chr7  | 5507500   |
| 13960    | EEF1D        | 0 | 3988   | EEF1D       | 0 | chr8  | 144747000 |
| 60410    | BARX2        | 0 | 15884  | BARX2       | 0 | chr11 | 128811500 |
| 60910    | BARX2        | 0 | 15384  | BARX2       | 0 | chr11 | 128812000 |
| 3346     | ICAM5        | 0 | 3454   | ICAM5       | 0 | chr19 | 10265000  |
| -75432   | C13orf31     | 0 | 52970  | NCRNA00284  | 0 | chr13 | 43441500  |
| -4379    | ZNF212       | 0 | 2194   | ZNF783      | 0 | chr7  | 148588000 |
| -10933   | CCDC77       | 0 | 6803   | B4GALNT3    | 0 | chr12 | 433000    |
| 10609    | PTBP1        | 0 | 4327   | PTBP1       | 0 | chr19 | 759000    |
| 11109    | PTBP1        | 0 | 3827   | PTBP1       | 0 | chr19 | 759500    |
| -220072  | LOC116437    | 0 | 278087 | SFRS8       | 0 | chr12 | 130483500 |
| -13184   | C21orf70     | 0 | 9056   | NCRNA00162  | 0 | chr21 | 45234500  |
| -13684   | C21orf70     | 0 | 8556   | NCRNA00162  | 0 | chr21 | 45235000  |
| -75712   | C1orf192     | 0 | 61828  | FCGR2A      | 0 | chr1  | 159680000 |
| -76212   | C1orf192     | 0 | 61328  | FCGR2A      | 0 | chr1  | 159680500 |
| -76712   | C1orf192     | 0 | 60828  | FCGR2A      | 0 | chr1  | 159681000 |
| -77212   | C1orf192     | 0 | 60328  | FCGR2A      | 0 | chr1  | 159681500 |
| -77712   | C1orf192     | 0 | 59828  | FCGR2A      | 0 | chr1  | 159682000 |
| -78212   | C1orf192     | 0 | 59328  | FCGR2A      | 0 | chr1  | 159682500 |
| 8298     | C21orf29     | 0 | 205423 | C21orf29    | 0 | chr21 | 44750500  |
| 4974     | ZIC4         | 0 | 15597  | ZIC4        | 0 | chr3  | 148591500 |
| 178      | UGT1A7       | 0 | 91184  | UGT1A7      | 0 | chr2  | 234255500 |
| -38714   | MGC12916     | 0 | 885320 | PMP22       | 0 | chr17 | 14188500  |
| -39714   | MGC12916     | 0 | 884320 | PMP22       | 0 | chr17 | 14189500  |
| -1800    | WDR45L       | 0 | 6732   | RAB40B      | 0 | chr17 | 78201500  |
| 12837    | BAIAP3       | 0 | 1943   | BAIAP3      | 0 | chr16 | 1337500   |
| 13337    | BAIAP3       | 0 | 1443   | BAIAP3      | 0 | chr16 | 1338000   |
| 16354    | FIBCD1       | 0 | 20276  | FIBCD1      | 0 | chr9  | 132784000 |
| 16854    | FIBCD1       | 0 | 19776  | FIBCD1      | 0 | chr9  | 132784500 |
| -2723579 | NLGN4Y       | 0 | 7934   | NCRNA00230B | 0 | chrY  | 18188500  |
| -2724079 | NLGN4Y       | 0 | 7434   | NCRNA00230B | 0 | chrY  | 18189000  |
| -2724579 | NLGN4Y       | 0 | 6934   | NCRNA00230B | 0 | chrY  | 18189500  |
| -87942   | FAM178B      | 0 | 97549  | FAHD2B      | 0 | chr2  | 97015500  |
| 10347    | CAMSAP1      | 0 | 88326  | CAMSAP1     | 0 | chr9  | 137850500 |
| -908     | TMEM184A     | 0 | 9994   | PSMG3       | 0 | chr7  | 1563500   |
| -1408    | TMEM184A     | 0 | 9494   | PSMG3       | 0 | chr7  | 1564000   |
| 2436     | DIRAS1       | 0 | 4390   | DIRAS1      | 0 | chr19 | 2668000   |
| 2936     | DIRAS1       | 0 | 3890   | DIRAS1      | 0 | chr19 | 2668500   |
| 45366    | LMF1         | 0 | 71985  | LMF1        | 0 | chr16 | 889000    |
| 45866    | LMF1         | 0 | 71485  | LMF1        | 0 | chr16 | 889500    |
| 46366    | LMF1         | 0 | 70985  | LMF1        | 0 | chr16 | 890000    |
| 68991    | ABR          | 0 | 114866 | ABR         | 0 | chr17 | 922500    |
| -372192  | FAM150B      | 0 | 7472   | TMEM18      | 0 | chr2  | 650500    |
| -1670    | PALM         | 0 | 1145   | C19orf21    | 0 | chr19 | 701000    |
| 2449     | GPS1         | 0 | 3135   | GPS1        | 0 | chr17 | 77605500  |
| -239577  | ---          | 0 | 103767 | ZNF479      | 0 | chr7  | 57087500  |
| -240077  | ---          | 0 | 103267 | ZNF479      | 0 | chr7  | 57088000  |
| -37794   | MUC6         | 0 | 374    | MUC2        | 0 | chr11 | 1064500   |
| 126      | MUC2         | 0 | 29417  | MUC2        | 0 | chr11 | 1065000   |

|         |            |   |        |             |   |       |           |
|---------|------------|---|--------|-------------|---|-------|-----------|
| 6572    | CHST5      | 0 | 69     | CHST5       | 0 | chr16 | 74126500  |
| 250961  | GMDS       | 0 | 370845 | GMDS        | 0 | chr6  | 1820000   |
| -1425   | HSPA12A    | 0 | 140795 | KIAA1598    | 0 | chr10 | 118493500 |
| -1925   | HSPA12A    | 0 | 140295 | KIAA1598    | 0 | chr10 | 118494000 |
| -13033  | CEACAM19   | 0 | 1697   | CEACAM16    | 0 | chr19 | 49892500  |
| -879    | SNORA72    | 0 | 21425  | C8orf47     | 0 | chr8  | 99124500  |
| 22418   | SMTNL2     | 0 | 1363   | SMTNL2      | 0 | chr17 | 4457000   |
| 38198   | FCGBP      | 0 | 48373  | FCGBP       | 0 | chr19 | 45084000  |
| 38698   | FCGBP      | 0 | 47873  | FCGBP       | 0 | chr19 | 45084500  |
| -2069   | STAT3      | 0 | 11993  | PTRF        | 0 | chr17 | 37796000  |
| -587    | NCRNA00175 | 0 | 29851  | COL18A1     | 0 | chr21 | 45670000  |
| 894     | ZNF513     | 0 | 2597   | ZNF513      | 0 | chr2  | 27454500  |
| 1394    | ZNF513     | 0 | 2097   | ZNF513      | 0 | chr2  | 27455000  |
| 4966    | MOBKLA2A   | 0 | 20269  | MOBKLA2A    | 0 | chr19 | 2027000   |
| 40214   | TERT       | 0 | 1662   | TERT        | 0 | chr5  | 1346500   |
| 6075    | GTPBP6     | 0 | 3387   | GTPBP6      | 0 | chrX  | 167500    |
| 6575    | GTPBP6     | 0 | 2887   | GTPBP6      | 0 | chrX  | 168000    |
| 10181   | MAP2K2     | 0 | 23626  | MAP2K2      | 0 | chr19 | 4051500   |
| 456     | SLC25A6    | 0 | 5498   | SLC25A6     | 0 | chrY  | 1465500   |
| -806    | PTGIR      | 0 | 8172   | GNG8        | 0 | chr19 | 51821000  |
| 2924    | ALPI       | 0 | 986    | ALPI        | 0 | chr2  | 233032000 |
| 275801  | VPS13D     | 0 | 6185   | VPS13D      | 0 | chr1  | 12488500  |
| 276301  | VPS13D     | 0 | 5685   | VPS13D      | 0 | chr1  | 12489000  |
| 1669    | APCDD1L    | 0 | 53855  | APCDD1L     | 0 | chr20 | 56469500  |
| 32701   | THBS2      | 0 | 5562   | THBS2       | 0 | chr6  | 169390500 |
| 11102   | GPR123     | 0 | 32669  | GPR123      | 0 | chr10 | 134762500 |
| -5777   | TWF2       | 0 | 1264   | PPM1M       | 0 | chr3  | 52254000  |
| 4792    | OBSL1      | 0 | 15755  | OBSL1       | 0 | chr2  | 220128500 |
| 15661   | LMTK3      | 0 | 12258  | LMTK3       | 0 | chr19 | 53696000  |
| 16161   | LMTK3      | 0 | 11758  | LMTK3       | 0 | chr19 | 53696500  |
| 35507   | AP3D1      | 0 | 15056  | AP3D1       | 0 | chr19 | 2087500   |
| 36007   | AP3D1      | 0 | 14556  | AP3D1       | 0 | chr19 | 2088000   |
| 344     | PACSIN3    | 0 | 8534   | PACSIN3     | 0 | chr11 | 47156000  |
| 2990    | ARSD       | 0 | 22392  | ARSD        | 0 | chrX  | 2835000   |
| 3490    | ARSD       | 0 | 21892  | ARSD        | 0 | chrX  | 2835500   |
| -1294   | FUT10      | 0 | 10726  | MAK16       | 0 | chr8  | 33451500  |
| -1794   | FUT10      | 0 | 10226  | MAK16       | 0 | chr8  | 33452000  |
| -7793   | CY TSA     | 0 | 2029   | ADORA2A     | 0 | chr22 | 23151500  |
| 112156  | ASAP2      | 0 | 86767  | ASAP2       | 0 | chr2  | 9376500   |
| 112656  | ASAP2      | 0 | 86267  | ASAP2       | 0 | chr2  | 9377000   |
| 416025  | ODZ4       | 0 | 371343 | ODZ4        | 0 | chr11 | 78458000  |
| 416525  | ODZ4       | 0 | 370843 | ODZ4        | 0 | chr11 | 78458500  |
| -3418   | IL3RA      | 0 | 44     | SLC25A6     | 0 | chrX  | 1465000   |
| 456     | SLC25A6    | 0 | 5498   | SLC25A6     | 0 | chrX  | 1465500   |
| -605    | ARHGAP29   | 0 | 180020 | ABCD3       | 0 | chr1  | 94476500  |
| 84      | IGFALS     | 0 | 3235   | IGFALS      | 0 | chr16 | 1780500   |
| 2854    | PIM3       | 0 | 723    | PIM3        | 0 | chr22 | 48743000  |
| 11292   | OBSL1      | 0 | 9255   | OBSL1       | 0 | chr2  | 220135000 |
| 11792   | OBSL1      | 0 | 8755   | OBSL1       | 0 | chr2  | 220135500 |
| 879030  | CAMTA1     | 0 | 105351 | CAMTA1      | 0 | chr1  | 7647000   |
| 879530  | CAMTA1     | 0 | 104851 | CAMTA1      | 0 | chr1  | 7647500   |
| -5183   | ZFP37      | 0 | 42826  | NCRNA00256B | 0 | chr9  | 114864000 |
| 119857  | ATP11A     | 0 | 76983  | ATP11A      | 0 | chr13 | 112512500 |
| -4142   | NCRNA00092 | 0 | 209409 | HSD17B3     | 0 | chr9  | 97828000  |
| -4642   | NCRNA00092 | 0 | 208909 | HSD17B3     | 0 | chr9  | 97828500  |
| -243598 | AQP9       | 0 | 2466   | LIPC        | 0 | chr15 | 56509000  |
| 93558   | BCOR       | 0 | 32526  | BCOR        | 0 | chrX  | 39889000  |
| -150478 | LRPAP1     | 0 | 83593  | ADRA2C      | 0 | chr4  | 3654500   |

|          |              |     |         |              |   |       |           |
|----------|--------------|-----|---------|--------------|---|-------|-----------|
| -150978  | LRPAP1       | 0   | 83093   | ADRA2C       | 0 | chr4  | 3655000   |
| 34678    | LOC100133669 | 0   | 1682    | LOC100133669 | 0 | chr8  | 144169500 |
| 35178    | LOC100133669 | 0   | 1182    | LOC100133669 | 0 | chr8  | 144170000 |
| -130464  | PLAC4        | 0   | 1030    | FAM3B        | 0 | chr21 | 41609500  |
| -2505    | C5orf51      | 0   | 1112    | FBXO4        | 0 | chr5  | 41960000  |
| -964     | ANGEL1       | 0   | 12477   | C14orf166B   | 0 | chr14 | 76350000  |
| 794      | CGB8         | 0   | 680     | CGB8         | 0 | chr19 | 54243500  |
| 1294     | CGB8         | 0   | 180     | CGB8         | 0 | chr19 | 54244000  |
| -2921    | VAMP3        | 0   | 349     | PER3         | 0 | chr1  | 7767000   |
| 151      | PER3         | 0   | 60324   | PER3         | 0 | chr1  | 7767500   |
| 2657     | RPS6KA2      | 0   | 450261  | RPS6KA2      | 0 | chr6  | 166745500 |
| 3157     | RPS6KA2      | 0   | 449761  | RPS6KA2      | 0 | chr6  | 166746000 |
| 885      | STUB1        | 0   | 1769    | STUB1        | 0 | chr16 | 671000    |
| 1385     | STUB1        | 0   | 1269    | STUB1        | 0 | chr16 | 671500    |
| 94207    | RPH3AL       | 0   | 46076   | RPH3AL       | 0 | chr17 | 156500    |
| 94707    | RPH3AL       | 0   | 45576   | RPH3AL       | 0 | chr17 | 157000    |
| 703      | ZNF581       | 0   | 1301    | ZNF581       | 0 | chr19 | 60847500  |
| 1203     | ZNF581       | 0   | 801     | ZNF581       | 0 | chr19 | 60848000  |
| 1703     | ZNF581       | 0   | 301     | ZNF581       | 0 | chr19 | 60848500  |
| -10061   | SCXA,SCXB    | 0   | 13077   | HSF1         | 0 | chr8  | 145473000 |
| 582      | HMHB1        | 0   | 7977    | HMHB1        | 0 | chr5  | 143172500 |
| -1058916 | GALR1        | 0   | 671262  | SALL3        | 0 | chr18 | 74170000  |
| -1059416 | GALR1        | 0   | 670762  | SALL3        | 0 | chr18 | 74170500  |
| 7564     | GRIN3B       | 0   | 1723    | GRIN3B       | 0 | chr19 | 959000    |
| 8064     | GRIN3B       | 0   | 1223    | GRIN3B       | 0 | chr19 | 959500    |
| -17309   | RREB1        | 0   | 12286   | SSR1         | 0 | chr6  | 7214000   |
| -136693  | RMI1         | 0   | 137411  | SLC28A3      | 0 | chr9  | 85945500  |
| -8998    | ATP4B        | 0   | 97      | GRK1         | 0 | chr13 | 113369500 |
| -35484   | PAX4         | 0   | 937     | SND1         | 0 | chr7  | 127078500 |
| -988     | POM121L1P    | 0   | 781     | GGTLC2       | 0 | chr22 | 21318000  |
| 95877    | KDM4B        | 0   | 88608   | KDM4B        | 0 | chr19 | 5016000   |
| 96377    | KDM4B        | 0   | 88108   | KDM4B        | 0 | chr19 | 5016500   |
| 22651    | SNAPC4       | 0   | 210     | SNAPC4       | 0 | chr9  | 138412500 |
| -22039   | GPR133       | 0   | 1508    | LOC116437    | 0 | chr12 | 130214000 |
| -22539   | GPR133       | 0   | 1008    | LOC116437    | 0 | chr12 | 130214500 |
| 29264    | NCK2         | 0   | 13160   | NCK2         | 0 | chr2  | 105864000 |
| 29764    | NCK2         | 0   | 12660   | NCK2         | 0 | chr2  | 105864500 |
| 43       | OR1N1        | 0   | 893     | OR1N1        | 0 | chr9  | 124328500 |
| 336      | USF1         | 0   | 6381    | USF1         | 0 | chr1  | 159276000 |
| 33607    | PRDM15       | 0   | 44660   | PRDM15       | 0 | chr21 | 42128000  |
| 34107    | PRDM15       | 0   | 44160   | PRDM15       | 0 | chr21 | 42128500  |
| -8800    | MLPH         | 0   | 2455    | PRLH         | 0 | chr2  | 238137500 |
| 12088    | EHD2         | 0   | 17703   | EHD2         | 0 | chr19 | 52920500  |
| 12588    | EHD2         | 0   | 17203   | EHD2         | 0 | chr19 | 52921000  |
| 13088    | EHD2         | 0   | 16703   | EHD2         | 0 | chr19 | 52921500  |
| 51679    | GRAMD4       | 0   | 1352    | GRAMD4       | 0 | chr22 | 45453000  |
| 52179    | GRAMD4       | 0   | 852     | GRAMD4       | 0 | chr22 | 45453500  |
| 92587    | NCOR2        | 0   | 118602  | NCOR2        | 0 | chr12 | 123467500 |
| 31604    | FAM73A       | 0   | 67169   | FAM73A       | 0 | chr1  | 78049500  |
| 32104    | FAM73A       | 0   | 66669   | FAM73A       | 0 | chr1  | 78050000  |
| 140428   | ADARB2       | 0   | 411218  | ADARB2       | 0 | chr10 | 1358500   |
| 2118     | EGFL8        | 0   | 1540    | EGFL8        | 0 | chr6  | 32242500  |
| 2618     | EGFL8        | 0   | 1040    | EGFL8        | 0 | chr6  | 32243000  |
| 98394    | ZNF516       | 0   | 5043    | ZNF516       | 0 | chr18 | 72299000  |
| 98894    | ZNF516       | 0   | 4543    | ZNF516       | 0 | chr18 | 72299500  |
| ---      | ---          | --- | 8333613 | TPTE         | 0 | chr21 | 1595000   |
| 584      | IGFALS       | 0   | 2735    | IGFALS       | 0 | chr16 | 1781000   |
| -179725  | JAK1         | 0   | 1319    | AK4          | 0 | chr1  | 65384500  |

|         |                |     |         |                |   |       |           |
|---------|----------------|-----|---------|----------------|---|-------|-----------|
| -204    | TCEB3CL,TCEB3C | 0   | 4070    | TCEB3CL,TCEB3C | 0 | chr18 | 42804500  |
| -704    | TCEB3CL,TCEB3C | 0   | 3570    | TCEB3CL,TCEB3C | 0 | chr18 | 42805000  |
| -1204   | TCEB3CL,TCEB3C | 0   | 3070    | TCEB3CL,TCEB3C | 0 | chr18 | 42805500  |
| -1704   | TCEB3CL,TCEB3C | 0   | 2570    | TCEB3CL,TCEB3C | 0 | chr18 | 42806000  |
| -2204   | TCEB3CL,TCEB3C | 0   | 2070    | TCEB3CL,TCEB3C | 0 | chr18 | 42806500  |
| 174606  | CELSR1         | 0   | 1731    | CELSR1         | 0 | chr22 | 45310000  |
| 175106  | CELSR1         | 0   | 1231    | CELSR1         | 0 | chr22 | 45310500  |
| 777     | ZFP64          | 0   | 39931   | ZFP64          | 0 | chr20 | 50202000  |
| 1277    | ZFP64          | 0   | 39431   | ZFP64          | 0 | chr20 | 50202500  |
| -731    | CD7            | 0   | 2688    | SECTM1         | 0 | chr17 | 77869500  |
| -254195 | FOXL1          | 0   | 493444  | FBXO31         | 0 | chr16 | 85427000  |
| 308217  | IGF1R          | 0   | 6782    | IGF1R          | 0 | chr15 | 97318500  |
| 24733   | CBFA2T3        | 0   | 41609   | CBFA2T3        | 0 | chr16 | 87493500  |
| 25233   | CBFA2T3        | 0   | 41109   | CBFA2T3        | 0 | chr16 | 87494000  |
| -49263  | PPP2R5C        | 0   | 8617    | DYNC1H1        | 0 | chr14 | 101492000 |
| -228900 | PSAPL1         | 0   | 90216   | AFAP1AS        | 0 | chr4  | 7716500   |
| -229400 | PSAPL1         | 0   | 89716   | AFAP1AS        | 0 | chr4  | 7717000   |
| -19620  | RAB12          | 0   | 58368   | KIAA0802       | 0 | chr18 | 8649000   |
| -20120  | RAB12          | 0   | 57868   | KIAA0802       | 0 | chr18 | 8649500   |
| ---     | ---            | --- | 990     | PLCXD1         | 0 | chrX  | 132000    |
| ---     | ---            | --- | 490     | PLCXD1         | 0 | chrX  | 132500    |
| 3358    | TYROBP         | 0   | 526     | TYROBP         | 0 | chr19 | 41090500  |
| 3858    | TYROBP         | 0   | 26      | TYROBP         | 0 | chr19 | 41091000  |
| 700     | ZAP70          | 0   | 4755    | ZAP70          | 0 | chr2  | 97718000  |
| 8618    | NDUFS7         | 0   | 3088    | NDUFS7         | 0 | chr19 | 1343500   |
| 9118    | NDUFS7         | 0   | 2588    | NDUFS7         | 0 | chr19 | 1344000   |
| 9618    | NDUFS7         | 0   | 2088    | NDUFS7         | 0 | chr19 | 1344500   |
| -111145 | SLC45A4        | 0   | 829     | LOC731779      | 0 | chr8  | 142419000 |
| -1570   | ANGPT1         | 0   | 399720  | RSPO2          | 0 | chr8  | 108581000 |
| -106575 | BANP           | 0   | 246379  | ZNF469         | 0 | chr16 | 86775000  |
| -107075 | BANP           | 0   | 245879  | ZNF469         | 0 | chr16 | 86775500  |
| -963    | NKX2-8         | 0   | 74032   | PAX9           | 0 | chr14 | 36122500  |
| 9129    | MUC5B          | 0   | 29982   | MUC5B          | 0 | chr11 | 1210000   |
| 9629    | MUC5B          | 0   | 29482   | MUC5B          | 0 | chr11 | 1210500   |
| -21403  | RFX1           | 0   | 516     | RLN3           | 0 | chr19 | 13999500  |
| -21903  | RFX1           | 0   | 16      | RLN3           | 0 | chr19 | 14000000  |
| -63630  | PEX10          | 0   | 113     | PLCH2          | 0 | chr1  | 2397500   |
| 13927   | ATP8B3         | 0   | 16270   | ATP8B3         | 0 | chr19 | 1747000   |
| 14427   | ATP8B3         | 0   | 15770   | ATP8B3         | 0 | chr19 | 1747500   |
| 39      | UBE2S          | 0   | 6637    | UBE2S          | 0 | chr19 | 60604500  |
| 23240   | ZNF362         | 0   | 20907   | ZNF362         | 0 | chr1  | 33518000  |
| -1578   | NPPA           | 0   | 8107    | NPPB           | 0 | chr1  | 11832000  |
| 18407   | SIGLEC5        | 0   | 539     | SIGLEC5        | 0 | chr19 | 56825000  |
| 18907   | SIGLEC5        | 0   | 39      | SIGLEC5        | 0 | chr19 | 56825500  |
| -12625  | CASP8AP2       | 0   | 7408    | GJA10          | 0 | chr6  | 90653500  |
| 43      | ISLR           | 0   | 2265    | ISLR           | 0 | chr15 | 72254000  |
| 12964   | ARID3A         | 0   | 33803   | ARID3A         | 0 | chr19 | 890000    |
| -186661 | HTR1B          | 0   | 1217407 | IRAK1BP1       | 0 | chr6  | 78416500  |
| -76300  | HERC2P2        | 0   | 355546  | MKRN3          | 0 | chr15 | 21006000  |
| -76800  | HERC2P2        | 0   | 355046  | MKRN3          | 0 | chr15 | 21006500  |
| 6464    | ARID3A         | 0   | 40303   | ARID3A         | 0 | chr19 | 883500    |
| -124120 | IRX4           | 0   | 739280  | IRX2           | 0 | chr5  | 2060000   |
| -124620 | IRX4           | 0   | 738780  | IRX2           | 0 | chr5  | 2060500   |
| 4326    | RFX2           | 0   | 113164  | RFX2           | 0 | chr19 | 5948500   |
| -8268   | AGPAT2         | 0   | 16844   | FAM69B         | 0 | chr9  | 138710000 |
| -8768   | AGPAT2         | 0   | 16344   | FAM69B         | 0 | chr9  | 138710500 |
| 45      | PRLH           | 0   | 557     | PRLH           | 0 | chr2  | 238140000 |
| 545     | PRLH           | 0   | 57      | PRLH           | 0 | chr2  | 238140500 |

|         |                 |   |        |           |   |       |           |
|---------|-----------------|---|--------|-----------|---|-------|-----------|
| 16291   | SLC6A19         | 0 | 7230   | SLC6A19   | 0 | chr5  | 1271000   |
| 37374   | SCARB1          | 0 | 48972  | SCARB1    | 0 | chr12 | 123865500 |
| 70297   | GPR116          | 0 | 32134  | GPR116    | 0 | chr6  | 46998500  |
| 12021   | FSCN1           | 0 | 1812   | FSCN1     | 0 | chr7  | 5611000   |
| 12521   | FSCN1           | 0 | 1312   | FSCN1     | 0 | chr7  | 5611500   |
| 76545   | FO XK1          | 0 | 12600  | FO XK1    | 0 | chr7  | 4765000   |
| 77045   | FO XK1          | 0 | 12100  | FO XK1    | 0 | chr7  | 4765500   |
| 12466   | PLXNB2          | 0 | 7336   | PLXNB2    | 0 | chr22 | 49068000  |
| 12074   | KCNH6           | 0 | 10834  | KCNH6     | 0 | chr17 | 58966500  |
| 12574   | KCNH6           | 0 | 10334  | KCNH6     | 0 | chr17 | 58967000  |
| 3535    | PDE6B           | 0 | 14180  | PDE6B     | 0 | chr4  | 640500    |
| 4035    | PDE6B           | 0 | 13680  | PDE6B     | 0 | chr4  | 641000    |
| 4202    | AMPD2           | 0 | 7200   | AMPD2     | 0 | chr1  | 109969000 |
| 4702    | AMPD2           | 0 | 6700   | AMPD2     | 0 | chr1  | 109969500 |
| -16023  | GPER            | 0 | 43069  | ZFAND2A   | 0 | chr7  | 1116000   |
| 74507   | SKI             | 0 | 7011   | SKI       | 0 | chr1  | 2224500   |
| 75507   | SKI             | 0 | 6011   | SKI       | 0 | chr1  | 2225500   |
| -21690  | TET3            | 0 | 5535   | BOLA3     | 0 | chr2  | 74210500  |
| -1034   | USP28           | 0 | 28298  | HTR3B     | 0 | chr11 | 113252500 |
| 182219  | FAM19A5         | 0 | 750    | FAM19A5   | 0 | chr22 | 47533000  |
| 27048   | PALM            | 0 | 12330  | PALM      | 0 | chr19 | 687000    |
| 13527   | MUC5AC          | 0 | 99302  | MUC5AC    | 0 | chr11 | 1146000   |
| -39679  | S3,LIMS3-LOC44C | 0 | 1555   | LOC440895 | 0 | chr2  | 110061000 |
| 20289   | PKD1            | 0 | 26900  | PKD1      | 0 | chr16 | 2099000   |
| 20789   | PKD1            | 0 | 26400  | PKD1      | 0 | chr16 | 2099500   |
| 10023   | PLOD3           | 0 | 1731   | PLOD3     | 0 | chr7  | 100646000 |
| 10660   | LAMB3           | 0 | 25802  | LAMB3     | 0 | chr1  | 207865500 |
| 10223   | GOLGA8B         | 0 | 514    | GOLGA8B   | 0 | chr15 | 32615000  |
| -1752   | RASL10A         | 0 | 10168  | AP1B1     | 0 | chr22 | 28043500  |
| -2252   | RASL10A         | 0 | 9668   | AP1B1     | 0 | chr22 | 28044000  |
| -2669   | HEATR7A         | 0 | 2004   | SCXA,SCXB | 0 | chr8  | 145391500 |
| -3169   | HEATR7A         | 0 | 1504   | SCXA,SCXB | 0 | chr8  | 145392000 |
| -32147  | CCNY            | 0 | 1343   | GJD4      | 0 | chr10 | 35933000  |
| -33147  | CCNY            | 0 | 343    | GJD4      | 0 | chr10 | 35934000  |
| 157     | GJD4            | 0 | 3369   | GJD4      | 0 | chr10 | 35934500  |
| -81263  | C3orf32         | 0 | 495    | CAV3      | 0 | chr3  | 8750000   |
| 5       | CAV3            | 0 | 12951  | CAV3      | 0 | chr3  | 8750500   |
| -156416 | TMEM121         | 0 | 230882 | KIAA0125  | 0 | chr14 | 105224000 |
| -156916 | TMEM121         | 0 | 230382 | KIAA0125  | 0 | chr14 | 105224500 |
| 6466    | PLXNB2          | 0 | 13336  | PLXNB2    | 0 | chr22 | 49062000  |
| 214     | TERT            | 0 | 41662  | TERT      | 0 | chr5  | 1306500   |
| 42310   | AATK            | 0 | 6467   | AATK      | 0 | chr17 | 76748000  |
| 12010   | PLCXD1          | 0 | 15020  | PLCXD1    | 0 | chrY  | 145000    |
| 12510   | PLCXD1          | 0 | 14520  | PLCXD1    | 0 | chrY  | 145500    |
| 56530   | SRC             | 0 | 2735   | SRC       | 0 | chr20 | 35464500  |
| 57030   | SRC             | 0 | 2235   | SRC       | 0 | chr20 | 35465000  |
| -151526 | ZNF599          | 0 | 2146   | ZNF30     | 0 | chr19 | 40107500  |
| -152026 | ZNF599          | 0 | 1646   | ZNF30     | 0 | chr19 | 40108000  |
| -669    | MFNG            | 0 | 3345   | CARD10    | 0 | chr22 | 36213000  |
| 108979  | HRNBP3          | 0 | 284158 | HRNBP3    | 0 | chr17 | 74706000  |
| 9208    | GRK6            | 0 | 6956   | GRK6      | 0 | chr5  | 176795500 |
| 9708    | GRK6            | 0 | 6456   | GRK6      | 0 | chr5  | 176796000 |
| 894     | ARHGDIG         | 0 | 1504   | ARHGDIG   | 0 | chr16 | 271500    |
| 255436  | FAM107B         | 0 | 902    | FAM107B   | 0 | chr10 | 14856000  |
| 255936  | FAM107B         | 0 | 402    | FAM107B   | 0 | chr10 | 14856500  |
| -98     | FAM107B         | 0 | 44256  | CDNF      | 0 | chr10 | 14857000  |
| 9296    | RAB11B          | 0 | 4817   | RAB11B    | 0 | chr19 | 8370500   |
| 9796    | RAB11B          | 0 | 4317   | RAB11B    | 0 | chr19 | 8371000   |



|         |               |   |        |               |   |       |           |
|---------|---------------|---|--------|---------------|---|-------|-----------|
| 111583  | VIT           | 0 | 6434   | VIT           | 0 | chr2  | 36889000  |
| 112083  | VIT           | 0 | 5934   | VIT           | 0 | chr2  | 36889500  |
| 355897  | PRDM16        | 0 | 13545  | PRDM16        | 0 | chr1  | 3331500   |
| 17123   | MAG           | 0 | 4547   | MAG           | 0 | chr19 | 40492000  |
| 17623   | MAG           | 0 | 4047   | MAG           | 0 | chr19 | 40492500  |
| 18123   | MAG           | 0 | 3547   | MAG           | 0 | chr19 | 40493000  |
| 12429   | ---           | 0 | 750    | ---           | 0 | chr4  | 1192000   |
| -1250   | ---           | 0 | 1227   | CTBP1         | 0 | chr4  | 1194000   |
| 2060    | PTX4          | 0 | 469    | PTX4          | 0 | chr16 | 1478000   |
| 147479  | ZNF423        | 0 | 188919 | ZNF423        | 0 | chr16 | 48229500  |
| 2621    | ACVRL1        | 0 | 8412   | ACVRL1        | 0 | chr12 | 50595000  |
| 3121    | ACVRL1        | 0 | 7912   | ACVRL1        | 0 | chr12 | 50595500  |
| -25288  | IRF8          | 0 | 383956 | LOC732275     | 0 | chr16 | 84539000  |
| -6140   | GALNT11       | 0 | 6442   | MLL3          | 0 | chr7  | 151456500 |
| 20237   | DNAH2         | 0 | 93783  | DNAH2         | 0 | chr17 | 7584000   |
| 20737   | DNAH2         | 0 | 93283  | DNAH2         | 0 | chr17 | 7584500   |
| 21237   | DNAH2         | 0 | 92783  | DNAH2         | 0 | chr17 | 7585000   |
| 2336    | SNX8          | 0 | 57125  | SNX8          | 0 | chr7  | 2263500   |
| -1387   | TNFRSF14      | 0 | 20108  | C1orf93       | 0 | chr1  | 2488000   |
| 20599   | TFAP2A        | 0 | 2283   | TFAP2A        | 0 | chr6  | 10525500  |
| -99     | WDR24         | 0 | 2005   | FBXL16        | 0 | chr16 | 680500    |
| -599    | WDR24         | 0 | 1505   | FBXL16        | 0 | chr16 | 681000    |
| -131    | LOC643955     | 0 | 903015 | ZNF735        | 0 | chr7  | 62402000  |
| 4922    | ADSSL1        | 0 | 18192  | ADSSL1        | 0 | chr14 | 104266500 |
| -32882  | NPHP4         | 0 | 966    | KCNAB2        | 0 | chr1  | 6008000   |
| 8517    | OBSCN         | 0 | 144574 | OBSCN         | 0 | chr1  | 226471000 |
| 5936    | TBL3          | 0 | 752    | TBL3          | 0 | chr16 | 1968000   |
| 7       | PRM2          | 0 | 838    | PRM2          | 0 | chr16 | 11277000  |
| 14289   | PKD1          | 0 | 32900  | PKD1          | 0 | chr16 | 2093000   |
| 14789   | PKD1          | 0 | 32400  | PKD1          | 0 | chr16 | 2093500   |
| -64069  | KRTAP9-4      | 0 | 194    | KRTAP17-1     | 0 | chr17 | 36724500  |
| 15695   | LOC154822     | 0 | 2189   | LOC154822     | 0 | chr7  | 158509500 |
| 15225   | LSP1          | 0 | 24069  | LSP1          | 0 | chr11 | 1846000   |
| -99819  | LRRC8C        | 0 | 1660   | LRRC8D        | 0 | chr1  | 90057500  |
| -100319 | LRRC8C        | 0 | 1160   | LRRC8D        | 0 | chr1  | 90058000  |
| 767     | SPANXE,SPANXD | 0 | 321    | SPANXE,SPANXD | 0 | chrX  | 140614000 |
| 31506   | DDB1          | 0 | 2242   | DDB1          | 0 | chr11 | 60855000  |
| 11255   | TUBB3         | 0 | 1506   | TUBB3         | 0 | chr16 | 88528500  |
| 11755   | TUBB3         | 0 | 1006   | TUBB3         | 0 | chr16 | 88529000  |
| 12255   | TUBB3         | 0 | 506    | TUBB3         | 0 | chr16 | 88529500  |
| -26545  | RIMBP3B       | 0 | 1692   | HIC2          | 0 | chr22 | 20100000  |
| -25406  | GTF2IRD2P1    | 0 | 6161   | NSUN5         | 0 | chr7  | 72349000  |
| -25906  | GTF2IRD2P1    | 0 | 5661   | NSUN5         | 0 | chr7  | 72349500  |
| -26406  | GTF2IRD2P1    | 0 | 5161   | NSUN5         | 0 | chr7  | 72350000  |
| 980     | EGLN2         | 0 | 7177   | EGLN2         | 0 | chr19 | 45999000  |
| 39486   | ZFPM1         | 0 | 42075  | ZFPM1         | 0 | chr16 | 87087000  |
| 39986   | ZFPM1         | 0 | 41575  | ZFPM1         | 0 | chr16 | 87087500  |
| -94     | KNDC1         | 0 | 3767   | UTF1          | 0 | chr10 | 134890000 |
| -105938 | MST1P9        | 0 | 51531  | CROCC         | 0 | chr1  | 17069500  |
| -106438 | MST1P9        | 0 | 51031  | CROCC         | 0 | chr1  | 17070000  |
| -106938 | MST1P9        | 0 | 50531  | CROCC         | 0 | chr1  | 17070500  |
| 7763    | KRT8          | 0 | 135    | KRT8          | 0 | chr12 | 51585000  |
| 130200  | HDAC4         | 0 | 222580 | HDAC4         | 0 | chr2  | 239765000 |
| 4897    | SLC45A3       | 0 | 17753  | SLC45A3       | 0 | chr1  | 203898500 |
| 5397    | SLC45A3       | 0 | 17253  | SLC45A3       | 0 | chr1  | 203899000 |
| 1360    | RGMA          | 0 | 44437  | RGMA          | 0 | chr15 | 91389000  |
| 1860    | RGMA          | 0 | 43937  | RGMA          | 0 | chr15 | 91389500  |
| 12612   | FURIN         | 0 | 2191   | FURIN         | 0 | chr15 | 89225500  |

|          |           |   |        |           |   |       |           |
|----------|-----------|---|--------|-----------|---|-------|-----------|
| 13112    | FURIN     | 0 | 1691   | FURIN     | 0 | chr15 | 89226000  |
| 246      | PIWIL2    | 0 | 80529  | PIWIL2    | 0 | chr8  | 22189000  |
| 476      | PIWIL2    | 0 | 80029  | PIWIL2    | 0 | chr8  | 22189500  |
| 18167    | SLC9A3    | 0 | 33049  | SLC9A3    | 0 | chr5  | 544500    |
| 101691   | GFRA2     | 0 | 6792   | GFRA2     | 0 | chr8  | 21695500  |
| 102191   | GFRA2     | 0 | 6292   | GFRA2     | 0 | chr8  | 21696000  |
| 102691   | GFRA2     | 0 | 5792   | GFRA2     | 0 | chr8  | 21696500  |
| -1485019 | NDST4     | 0 | 484657 | TRAM1L1   | 0 | chr4  | 117739500 |
| -1485519 | NDST4     | 0 | 484157 | TRAM1L1   | 0 | chr4  | 117740000 |
| 70087    | TBC1D16   | 0 | 25742  | TBC1D16   | 0 | chr17 | 75598500  |
| 64537    | PCNT      | 0 | 57110  | PCNT      | 0 | chr21 | 46633000  |
| 65037    | PCNT      | 0 | 56610  | PCNT      | 0 | chr21 | 46633500  |
| 2308     | NME4      | 0 | 1255   | NME4      | 0 | chr16 | 389500    |
| 2808     | NME4      | 0 | 755    | NME4      | 0 | chr16 | 390000    |
| 3308     | NME4      | 0 | 255    | NME4      | 0 | chr16 | 390500    |
| 531      | MKNK2     | 0 | 13243  | MKNK2     | 0 | chr19 | 1989000   |
| 1031     | MKNK2     | 0 | 12743  | MKNK2     | 0 | chr19 | 1989500   |
| 8935     | GIGYF1    | 0 | 806    | GIGYF1    | 0 | chr7  | 100124000 |
| 9435     | GIGYF1    | 0 | 306    | GIGYF1    | 0 | chr7  | 100124500 |
| -1307    | PRM1      | 0 | 62811  | C16orf75  | 0 | chr16 | 11284000  |
| -432     | TSPAN3    | 0 | 36525  | SGK269    | 0 | chr15 | 75151000  |
| -932     | TSPAN3    | 0 | 36025  | SGK269    | 0 | chr15 | 75151500  |
| -300954  | SIX2      | 0 | 78323  | SRBD1     | 0 | chr2  | 45391000  |
| -301454  | SIX2      | 0 | 77823  | SRBD1     | 0 | chr2  | 45391500  |
| 76615    | MED15     | 0 | 3419   | MED15     | 0 | chr22 | 19268500  |
| -24097   | TPTE2     | 0 | 72879  | MPHOSPH8  | 0 | chr13 | 19033000  |
| -24597   | TPTE2     | 0 | 72379  | MPHOSPH8  | 0 | chr13 | 19033500  |
| 12537    | TACR2     | 0 | 180    | TACR2     | 0 | chr10 | 70846500  |
| 148      | MAP1LC3A  | 0 | 13310  | MAP1LC3A  | 0 | chr20 | 32598500  |
| 220      | C20orf144 | 0 | 1381   | C20orf144 | 0 | chr20 | 31714000  |
| 39783    | PAPD7     | 0 | 2661   | PAPD7     | 0 | chr5  | 6807500   |
| 40283    | PAPD7     | 0 | 2161   | PAPD7     | 0 | chr5  | 6808000   |
| -66620   | IRX4      | 0 | 796780 | IRX2      | 0 | chr5  | 2002500   |
| 38938    | ADAP1     | 0 | 17815  | ADAP1     | 0 | chr7  | 943000    |
| 121705   | RASA3     | 0 | 29197  | RASA3     | 0 | chr13 | 113887000 |
| 122205   | RASA3     | 0 | 28697  | RASA3     | 0 | chr13 | 113887500 |
| -20363   | ACTR3     | 0 | 463368 | DPP10     | 0 | chr2  | 114453000 |
| -20863   | ACTR3     | 0 | 462868 | DPP10     | 0 | chr2  | 114453500 |
| -21363   | ACTR3     | 0 | 462368 | DPP10     | 0 | chr2  | 114454000 |
| 17900    | SBF1      | 0 | 10320  | SBF1      | 0 | chr22 | 49250000  |
| -759620  | IRX4      | 0 | 103780 | IRX2      | 0 | chr5  | 2695500   |
| -760120  | IRX4      | 0 | 103280 | IRX2      | 0 | chr5  | 2696000   |
| 58835    | UNC5A     | 0 | 11505  | UNC5A     | 0 | chr5  | 176229000 |
| 811895   | SDK1      | 0 | 155657 | SDK1      | 0 | chr7  | 4119500   |
| 812395   | SDK1      | 0 | 155157 | SDK1      | 0 | chr7  | 4120000   |
| 812895   | SDK1      | 0 | 154657 | SDK1      | 0 | chr7  | 4120500   |
| 5313     | SOX7      | 0 | 1432   | SOX7      | 0 | chr8  | 10624000  |
| 141700   | HDAC4     | 0 | 211080 | HDAC4     | 0 | chr2  | 239776500 |
| -103364  | C21orf81  | 0 | 25005  | LIP1      | 0 | chr21 | 14378000  |
| -103864  | C21orf81  | 0 | 24505  | LIP1      | 0 | chr21 | 14378500  |
| -882     | GK5       | 0 | 80138  | XRN1      | 0 | chr3  | 143428000 |
| 1068     | GNPTG     | 0 | 10353  | GNPTG     | 0 | chr16 | 1343000   |
| 811      | GNAS      | 0 | 70645  | GNAS      | 0 | chr20 | 56849000  |
| -753307  | PLSCR5    | 0 | 26526  | ZIC4      | 0 | chr3  | 148560000 |
| 28333    | NKD2      | 0 | 1425   | NKD2      | 0 | chr5  | 1090500   |
| 28833    | NKD2      | 0 | 925    | NKD2      | 0 | chr5  | 1091000   |
| 29333    | NKD2      | 0 | 425    | NKD2      | 0 | chr5  | 1091500   |
| 26406    | PHLDB3    | 0 | 3325   | PHLDB3    | 0 | chr19 | 48697500  |

|        |              |   |        |            |   |       |           |
|--------|--------------|---|--------|------------|---|-------|-----------|
| 26906  | PHLDB3       | 0 | 2825   | PHLDB3     | 0 | chr19 | 48698000  |
| -52944 | FGFR10P      | 0 | 18284  | CCR6       | 0 | chr6  | 167427000 |
| -53444 | FGFR10P      | 0 | 17784  | CCR6       | 0 | chr6  | 167427500 |
| 14317  | GGT7         | 0 | 13822  | GGT7       | 0 | chr20 | 32910500  |
| 14817  | GGT7         | 0 | 13322  | GGT7       | 0 | chr20 | 32911000  |
| 9117   | C15orf51     | 0 | 7655   | C15orf51   | 0 | chr15 | 98157000  |
| 68192  | MKX          | 0 | 4784   | MKX        | 0 | chr10 | 28070000  |
| 68692  | MKX          | 0 | 4284   | MKX        | 0 | chr10 | 28070500  |
| 97345  | MCF2L        | 0 | 21863  | MCF2L      | 0 | chr13 | 112779000 |
| 49353  | DOT1L        | 0 | 19077  | DOT1L      | 0 | chr19 | 2164500   |
| 49853  | DOT1L        | 0 | 18577  | DOT1L      | 0 | chr19 | 2165000   |
| -91380 | LOC728613    | 0 | 72998  | MRPL36     | 0 | chr5  | 1778500   |
| -37789 | SLC25A28     | 0 | 1252   | ENTPD7     | 0 | chr10 | 101408000 |
| 191869 | APBA2        | 0 | 4808   | APBA2      | 0 | chr15 | 27193000  |
| 192369 | APBA2        | 0 | 4308   | APBA2      | 0 | chr15 | 27193500  |
| 11177  | MUC6         | 0 | 12706  | MUC6       | 0 | chr11 | 1014000   |
| -452   | CCDC9        | 0 | 2481   | PRR24      | 0 | chr19 | 52467500  |
| -577   | PHF2P1       | 0 | 54917  | TUBA3C     | 0 | chr13 | 18591000  |
| -10433 | CCDC77       | 0 | 7303   | B4GALNT3   | 0 | chr12 | 432500    |
| 506    | PHYHD1       | 0 | 20641  | PHYHD1     | 0 | chr9  | 130723500 |
| 1006   | PHYHD1       | 0 | 20141  | PHYHD1     | 0 | chr9  | 130724000 |
| 109200 | VWF          | 0 | 66597  | VWF        | 0 | chr12 | 6037500   |
| -15170 | LOC441956    | 0 | 146825 | C21orf15   | 0 | chr21 | 13990500  |
| 1211   | PSORS1C2     | 0 | 606    | PSORS1C2   | 0 | chr6  | 31214500  |
| 3626   | NCLN         | 0 | 20073  | NCLN       | 0 | chr19 | 3140500   |
| 4126   | NCLN         | 0 | 19573  | NCLN       | 0 | chr19 | 3141000   |
| 2555   | SLC43A2      | 0 | 51880  | SLC43A2    | 0 | chr17 | 1427000   |
| 3055   | SLC43A2      | 0 | 51380  | SLC43A2    | 0 | chr17 | 1427500   |
| 9626   | TNNT3        | 0 | 9512   | TNNT3      | 0 | chr11 | 1907000   |
| 3253   | MAGED4       | 0 | 4104   | MAGED4     | 0 | chrX  | 51948000  |
| 22221  | PTDSS2       | 0 | 18887  | PTDSS2     | 0 | chr11 | 462500    |
| 22721  | PTDSS2       | 0 | 18387  | PTDSS2     | 0 | chr11 | 463000    |
| -60724 | ZNF562       | 0 | 21650  | ZNF846     | 0 | chr19 | 9707500   |
| -2031  | PTX4         | 0 | 2852   | TELO2      | 0 | chr16 | 1480500   |
| 21312  | AMZ1         | 0 | 14595  | AMZ1       | 0 | chr7  | 2707000   |
| 6300   | FAM83C       | 0 | 639    | FAM83C     | 0 | chr20 | 33343000  |
| 57256  | JAK2         | 0 | 85682  | JAK2       | 0 | chr9  | 5032500   |
| 57756  | JAK2         | 0 | 85182  | JAK2       | 0 | chr9  | 5033000   |
| -94608 | ALOX12P2     | 0 | 1107   | ALOX12     | 0 | chr17 | 6839000   |
| 8118   | C21orf70     | 0 | 28816  | C21orf70   | 0 | chr21 | 45192500  |
| 8618   | C21orf70     | 0 | 28316  | C21orf70   | 0 | chr21 | 45193000  |
| -1309  | TAF12        | 0 | 4198   | RNU11      | 0 | chr1  | 28843500  |
| 12756  | REXO1        | 0 | 20452  | REXO1      | 0 | chr19 | 1779000   |
| 652    | SLC25A11     | 0 | 2063   | SLC25A11   | 0 | chr17 | 4782000   |
| 9780   | RASSF1       | 0 | 1371   | RASSF1     | 0 | chr3  | 50352000  |
| -58858 | BEX5         | 0 | 435    | NXF2B,NXF2 | 0 | chrX  | 101356500 |
| 65     | NXF2B,NXF2   | 0 | 111290 | NXF2B,NXF2 | 0 | chrX  | 101357000 |
| 1460   | CST11        | 0 | 982    | CST11      | 0 | chr20 | 23380500  |
| 1960   | CST11        | 0 | 482    | CST11      | 0 | chr20 | 23381000  |
| -117   | WIF1         | 0 | 48137  | LEMD3      | 0 | chr12 | 63801500  |
| -617   | WIF1         | 0 | 47637  | LEMD3      | 0 | chr12 | 63802000  |
| -431   | SPDEF        | 0 | 30547  | C6orf106   | 0 | chr6  | 34632500  |
| -931   | SPDEF        | 0 | 30047  | C6orf106   | 0 | chr6  | 34633000  |
| 8454   | HEXIM2       | 0 | 689    | HEXIM2     | 0 | chr17 | 40602500  |
| 8954   | HEXIM2       | 0 | 189    | HEXIM2     | 0 | chr17 | 40603000  |
| 358686 | C9orf3       | 0 | 1762   | C9orf3     | 0 | chr9  | 96887500  |
| 359686 | C9orf3       | 0 | 762    | C9orf3     | 0 | chr9  | 96888500  |
| -1349  | TTY23B,TTY23 | 0 | 1263   | TSPY2      | 0 | chrY  | 6173000   |

111026

NXF2

0

388

NXF2

0

chrX

101613000

| ..peak value /window and probe (mean is count > 1) |         |         |             |             |             |          | p-value t-test<br>over peak<br>scores |
|----------------------------------------------------|---------|---------|-------------|-------------|-------------|----------|---------------------------------------|
| Astro 2                                            | Astro 3 | Astro 4 | HNSCNanog 1 | HNSCNanog 3 | HNSCNanog 4 |          |                                       |
| 3.24                                               | 3.23    | 3.24    | 0.0103      | 0.0105      | 0.0109      | 6.88E-12 |                                       |
| 3.24                                               | 3.23    | 3.24    | 0.0103      | 0.0105      | 0.0109      | 6.88E-12 |                                       |
| 3.24                                               | 3.23    | 3.24    | 0.0103      | 0.0105      | 0.0109      | 6.88E-12 |                                       |
| 2.84                                               | 2.84    | 2.82    | 0.0103      | 0.0105      | 0.0109      | 1.87E-10 |                                       |
| 2.84                                               | 2.84    | 2.82    | 0.0103      | 0.0105      | 0.0109      | 1.87E-10 |                                       |
| 2.4                                                | 2.38    | 2.39    | 0.0103      | 0.0105      | 0.0109      | 2.08E-10 |                                       |
| 2.4                                                | 2.38    | 2.39    | 0.0103      | 0.0105      | 0.0109      | 2.08E-10 |                                       |
| 2.65                                               | 2.66    | 2.68    | 0.0103      | 0.0105      | 0.0109      | 7.33E-10 |                                       |
| 2.65                                               | 2.66    | 2.68    | 0.0103      | 0.0105      | 0.0109      | 7.33E-10 |                                       |
| 2.54                                               | 2.52    | 2.51    | 0.0103      | 0.0105      | 0.0109      | 9.11E-10 |                                       |
| 3.32                                               | 3.36    | 3.33    | 0.0103      | 0.0105      | 0.0109      | 1.02E-09 |                                       |
| 4.05                                               | 4.1     | 4.09    | 0.0103      | 0.0105      | 0.0109      | 1.19E-09 |                                       |
| 2.99                                               | 3.01    | 2.97    | 0.0103      | 0.0105      | 0.0109      | 1.35E-09 |                                       |
| 5.07                                               | 5.01    | 5.01    | 0.0103      | 0.0105      | 0.0109      | 1.51E-09 |                                       |
| 5.07                                               | 5.01    | 5.01    | 0.0103      | 0.0105      | 0.0109      | 1.51E-09 |                                       |
| 2.5                                                | 2.5     | 2.47    | 0.0103      | 0.0105      | 0.0109      | 1.59E-09 |                                       |
| 2.43                                               | 2.46    | 2.46    | 0.0103      | 0.0105      | 0.0109      | 1.70E-09 |                                       |
| 2.41                                               | 2.41    | 2.44    | 0.0103      | 0.0105      | 0.0109      | 1.78E-09 |                                       |
| 2.41                                               | 2.41    | 2.44    | 0.0103      | 0.0105      | 0.0109      | 1.78E-09 |                                       |
| 2.63                                               | 2.66    | 2.62    | 0.0103      | 0.0105      | 0.0109      | 2.63E-09 |                                       |
| 2.5                                                | 2.46    | 2.48    | 0.0103      | 0.0105      | 0.0109      | 2.87E-09 |                                       |
| 2.48                                               | 2.46    | 2.5     | 0.0103      | 0.0105      | 0.0109      | 2.87E-09 |                                       |
| 2.75                                               | 2.78    | 2.8     | 0.0103      | 0.0105      | 0.0109      | 4.57E-09 |                                       |
| 2.75                                               | 2.78    | 2.8     | 0.0103      | 0.0105      | 0.0109      | 4.57E-09 |                                       |
| 2.72                                               | 2.69    | 2.67    | 0.0103      | 0.0105      | 0.0109      | 5.16E-09 |                                       |
| 4.22                                               | 4.3     | 4.28    | 0.0103      | 0.0105      | 0.0109      | 6.10E-09 |                                       |
| 4.09                                               | 4.01    | 4.04    | 0.0103      | 0.0105      | 0.0109      | 6.70E-09 |                                       |
| 3.05                                               | 3.03    | 3.09    | 0.0103      | 0.0105      | 0.0109      | 6.75E-09 |                                       |
| 4.15                                               | 4.13    | 4.07    | 0.0103      | 0.0105      | 0.0109      | 7.05E-09 |                                       |
| 3.92                                               | 4       | 3.99    | 0.0103      | 0.0105      | 0.0109      | 9.79E-09 |                                       |
| 3.92                                               | 4       | 3.99    | 0.0103      | 0.0105      | 0.0109      | 9.79E-09 |                                       |
| 3.92                                               | 4       | 3.99    | 0.0103      | 0.0105      | 0.0109      | 9.79E-09 |                                       |
| 3.52                                               | 3.55    | 3.47    | 0.0103      | 0.0105      | 0.0109      | 1.18E-08 |                                       |
| 0.011                                              | 0.012   | 0.0117  | 2.74        | 2.69        | 2.68        | 1.36E-08 |                                       |
| 0.011                                              | 0.012   | 0.0117  | 2.74        | 2.69        | 2.68        | 1.36E-08 |                                       |
| 2.67                                               | 2.68    | 2.73    | 0.0103      | 0.0105      | 0.0109      | 1.37E-08 |                                       |
| 2.67                                               | 2.68    | 2.73    | 0.0103      | 0.0105      | 0.0109      | 1.37E-08 |                                       |
| 4.76                                               | 4.85    | 4.87    | 0.0103      | 0.0105      | 0.0109      | 1.46E-08 |                                       |
| 3.29                                               | 3.32    | 3.37    | 0.0103      | 0.0105      | 0.0109      | 1.47E-08 |                                       |
| 3.29                                               | 3.32    | 3.37    | 0.0103      | 0.0105      | 0.0109      | 1.47E-08 |                                       |
| 3.29                                               | 3.32    | 3.37    | 0.0103      | 0.0105      | 0.0109      | 1.47E-08 |                                       |
| 2.93                                               | 2.99    | 3       | 0.0103      | 0.0105      | 0.0109      | 1.78E-08 |                                       |
| 2.93                                               | 2.99    | 3       | 0.0103      | 0.0105      | 0.0109      | 1.78E-08 |                                       |
| 2.93                                               | 2.99    | 3       | 0.0103      | 0.0105      | 0.0109      | 1.78E-08 |                                       |
| 2.24                                               | 2.29    | 2.24    | 0.0103      | 0.0105      | 0.0109      | 1.82E-08 |                                       |
| 2.24                                               | 2.29    | 2.24    | 0.0103      | 0.0105      | 0.0109      | 1.82E-08 |                                       |
| 2.51                                               | 2.52    | 2.46    | 0.0103      | 0.0105      | 0.0109      | 1.86E-08 |                                       |
| 2.51                                               | 2.52    | 2.46    | 0.0103      | 0.0105      | 0.0109      | 1.86E-08 |                                       |
| 2.37                                               | 2.35    | 2.31    | 0.0103      | 0.0105      | 0.0109      | 1.96E-08 |                                       |
| 2.29                                               | 2.35    | 2.33    | 0.0103      | 0.0105      | 0.0109      | 2.03E-08 |                                       |
| 2.29                                               | 2.35    | 2.33    | 0.0103      | 0.0105      | 0.0109      | 2.03E-08 |                                       |
| 2.7                                                | 2.66    | 2.63    | 0.0103      | 0.0105      | 0.0109      | 2.05E-08 |                                       |
| 2.7                                                | 2.66    | 2.63    | 0.0103      | 0.0105      | 0.0109      | 2.05E-08 |                                       |

|       |       |        |        |        |        |          |
|-------|-------|--------|--------|--------|--------|----------|
| 3.12  | 3.14  | 3.06   | 0.0103 | 0.0105 | 0.0109 | 2.18E-08 |
| 2.96  | 3.04  | 2.99   | 0.0103 | 0.0105 | 0.0109 | 2.24E-08 |
| 2.96  | 3.04  | 2.99   | 0.0103 | 0.0105 | 0.0109 | 2.24E-08 |
| 2.25  | 2.27  | 2.21   | 0.0103 | 0.0105 | 0.0109 | 2.34E-08 |
| 2.25  | 2.27  | 2.21   | 0.0103 | 0.0105 | 0.0109 | 2.34E-08 |
| 0.011 | 0.012 | 0.0117 | 2.75   | 2.74   | 2.68   | 2.53E-08 |
| 0.011 | 0.012 | 0.0117 | 2.75   | 2.74   | 2.68   | 2.53E-08 |
| 3.03  | 3.04  | 3.11   | 0.0103 | 0.0105 | 0.0109 | 2.78E-08 |
| 3.03  | 3.04  | 3.11   | 0.0103 | 0.0105 | 0.0109 | 2.78E-08 |
| 0.011 | 0.012 | 0.0117 | 2.41   | 2.41   | 2.47   | 2.81E-08 |
| 0.011 | 0.012 | 0.0117 | 2.41   | 2.41   | 2.47   | 2.81E-08 |
| 2.56  | 2.51  | 2.49   | 0.0103 | 0.0105 | 0.0109 | 2.84E-08 |
| 3.44  | 3.49  | 3.54   | 0.0103 | 0.0105 | 0.0109 | 2.84E-08 |
| 4.26  | 4.35  | 4.38   | 0.0103 | 0.0105 | 0.0109 | 2.91E-08 |
| 4.26  | 4.35  | 4.38   | 0.0103 | 0.0105 | 0.0109 | 2.91E-08 |
| 2.65  | 2.58  | 2.64   | 0.0103 | 0.0105 | 0.0109 | 2.94E-08 |
| 2.65  | 2.58  | 2.64   | 0.0103 | 0.0105 | 0.0109 | 2.94E-08 |
| 2.42  | 2.42  | 2.36   | 0.0103 | 0.0105 | 0.0109 | 2.94E-08 |
| 2.42  | 2.42  | 2.36   | 0.0103 | 0.0105 | 0.0109 | 2.94E-08 |
| 2.43  | 2.37  | 2.37   | 0.0103 | 0.0105 | 0.0109 | 2.99E-08 |
| 2.41  | 2.43  | 2.48   | 0.0103 | 0.0105 | 0.0109 | 3.23E-08 |
| 2.74  | 2.66  | 2.71   | 0.0103 | 0.0105 | 0.0109 | 3.38E-08 |
| 2.74  | 2.66  | 2.71   | 0.0103 | 0.0105 | 0.0109 | 3.38E-08 |
| 2.34  | 2.38  | 2.31   | 0.0103 | 0.0105 | 0.0109 | 3.42E-08 |
| 2.34  | 2.38  | 2.31   | 0.0103 | 0.0105 | 0.0109 | 3.42E-08 |
| 2.52  | 2.45  | 2.46   | 0.0103 | 0.0105 | 0.0109 | 3.70E-08 |
| 2.52  | 2.45  | 2.46   | 0.0103 | 0.0105 | 0.0109 | 3.70E-08 |
| 0.011 | 0.012 | 0.0117 | 3.37   | 3.27   | 3.34   | 3.83E-08 |
| 2.3   | 2.26  | 2.23   | 0.0103 | 0.0105 | 0.0109 | 3.94E-08 |
| 2.3   | 2.26  | 2.23   | 0.0103 | 0.0105 | 0.0109 | 3.94E-08 |
| 2.87  | 2.9   | 2.96   | 0.0103 | 0.0105 | 0.0109 | 4.16E-08 |
| 2.87  | 2.9   | 2.96   | 0.0103 | 0.0105 | 0.0109 | 4.16E-08 |
| 2.93  | 2.84  | 2.9    | 0.0103 | 0.0105 | 0.0109 | 4.27E-08 |
| 2.93  | 2.84  | 2.9    | 0.0103 | 0.0105 | 0.0109 | 4.27E-08 |
| 2.16  | 2.23  | 2.19   | 0.0103 | 0.0105 | 0.0109 | 4.47E-08 |
| 2.16  | 2.23  | 2.19   | 0.0103 | 0.0105 | 0.0109 | 4.47E-08 |
| 3.32  | 3.41  | 3.42   | 0.0103 | 0.0105 | 0.0109 | 4.74E-08 |
| 3.32  | 3.41  | 3.42   | 0.0103 | 0.0105 | 0.0109 | 4.74E-08 |
| 3.32  | 3.41  | 3.42   | 0.0103 | 0.0105 | 0.0109 | 4.74E-08 |
| 2.72  | 2.81  | 2.76   | 0.0103 | 0.0105 | 0.0109 | 4.80E-08 |
| 2.72  | 2.81  | 2.76   | 0.0103 | 0.0105 | 0.0109 | 4.80E-08 |
| 2.8   | 2.89  | 2.87   | 0.0103 | 0.0105 | 0.0109 | 5.09E-08 |
| 3.9   | 3.89  | 4.01   | 0.0103 | 0.0105 | 0.0109 | 5.53E-08 |
| 3.2   | 3.21  | 3.11   | 0.0103 | 0.0105 | 0.0109 | 6.13E-08 |
| 0.011 | 0.012 | 0.0117 | 2.99   | 3.07   | 3.09   | 6.13E-08 |
| 4.39  | 4.25  | 4.27   | 0.0103 | 0.0105 | 0.0109 | 6.45E-08 |
| 2.48  | 2.41  | 2.4    | 0.0103 | 0.0105 | 0.0109 | 7.02E-08 |
| 2.48  | 2.41  | 2.4    | 0.0103 | 0.0105 | 0.0109 | 7.02E-08 |
| 2.58  | 2.65  | 2.67   | 0.0103 | 0.0105 | 0.0109 | 7.02E-08 |
| 2.22  | 2.3   | 2.28   | 0.0103 | 0.0105 | 0.0109 | 7.73E-08 |
| 4.02  | 4.09  | 3.94   | 0.0103 | 0.0105 | 0.0109 | 8.21E-08 |
| 4.02  | 4.09  | 3.94   | 0.0103 | 0.0105 | 0.0109 | 8.21E-08 |
| 4.02  | 4.09  | 3.94   | 0.0103 | 0.0105 | 0.0109 | 8.21E-08 |
| 0.011 | 0.012 | 0.0117 | 4.21   | 4.07   | 4.2    | 8.37E-08 |
| 3.48  | 3.57  | 3.44   | 0.0103 | 0.0105 | 0.0109 | 8.86E-08 |
| 2.41  | 2.35  | 2.44   | 0.0103 | 0.0105 | 0.0109 | 9.01E-08 |
| 2.12  | 2.15  | 2.07   | 0.0103 | 0.0105 | 0.0109 | 9.09E-08 |
| 2.76  | 2.68  | 2.78   | 0.0103 | 0.0105 | 0.0109 | 9.41E-08 |

|       |       |        |        |        |        |          |
|-------|-------|--------|--------|--------|--------|----------|
| 2.76  | 2.68  | 2.78   | 0.0103 | 0.0105 | 0.0109 | 9.41E-08 |
| 2.56  | 2.48  | 2.57   | 0.0103 | 0.0105 | 0.0109 | 9.69E-08 |
| 2.56  | 2.48  | 2.57   | 0.0103 | 0.0105 | 0.0109 | 9.69E-08 |
| 3.25  | 3.3   | 3.38   | 0.0103 | 0.0105 | 0.0109 | 1.04E-07 |
| 2.27  | 2.36  | 2.3    | 0.0103 | 0.0105 | 0.0109 | 1.05E-07 |
| 0.011 | 0.012 | 0.0117 | 2.75   | 2.81   | 2.7    | 1.08E-07 |
| 0.011 | 0.012 | 0.0117 | 2.75   | 2.81   | 2.7    | 1.08E-07 |
| 3.61  | 3.62  | 3.49   | 0.0103 | 0.0105 | 0.0109 | 1.13E-07 |
| 3.61  | 3.62  | 3.49   | 0.0103 | 0.0105 | 0.0109 | 1.13E-07 |
| 2.33  | 2.35  | 2.26   | 0.0103 | 0.0105 | 0.0109 | 1.18E-07 |
| 0.011 | 0.012 | 0.0117 | 2.55   | 2.52   | 2.45   | 1.19E-07 |
| 4.18  | 4.04  | 4.03   | 0.0103 | 0.0105 | 0.0109 | 1.20E-07 |
| 4.18  | 4.04  | 4.03   | 0.0103 | 0.0105 | 0.0109 | 1.20E-07 |
| 2.93  | 3.03  | 2.92   | 0.0103 | 0.0105 | 0.0109 | 1.20E-07 |
| 2.25  | 2.32  | 2.23   | 0.0103 | 0.0105 | 0.0109 | 1.28E-07 |
| 0.011 | 0.012 | 0.0117 | 2.4    | 2.36   | 2.46   | 1.30E-07 |
| 0.011 | 0.012 | 0.0117 | 2.4    | 2.36   | 2.46   | 1.30E-07 |
| 0.011 | 0.012 | 0.0117 | 3.22   | 3.19   | 3.32   | 1.31E-07 |
| 0.011 | 0.012 | 0.0117 | 2.7    | 2.59   | 2.63   | 1.34E-07 |
| 3.1   | 3.09  | 3.21   | 0.0103 | 0.0105 | 0.0109 | 1.38E-07 |
| 2.4   | 2.37  | 2.47   | 0.0103 | 0.0105 | 0.0109 | 1.39E-07 |
| 2.4   | 2.37  | 2.47   | 0.0103 | 0.0105 | 0.0109 | 1.39E-07 |
| 0.011 | 0.012 | 0.0117 | 2.68   | 2.71   | 2.6    | 1.41E-07 |
| 2.13  | 2.07  | 2.16   | 0.0103 | 0.0105 | 0.0109 | 1.48E-07 |
| 2.13  | 2.07  | 2.16   | 0.0103 | 0.0105 | 0.0109 | 1.48E-07 |
| 2.28  | 2.38  | 2.32   | 0.0103 | 0.0105 | 0.0109 | 1.49E-07 |
| 2.5   | 2.61  | 2.57   | 0.0103 | 0.0105 | 0.0109 | 1.52E-07 |
| 3.09  | 3     | 2.96   | 0.0103 | 0.0105 | 0.0109 | 1.60E-07 |
| 3.09  | 3     | 2.96   | 0.0103 | 0.0105 | 0.0109 | 1.60E-07 |
| 3.09  | 2.98  | 2.97   | 0.0103 | 0.0105 | 0.0109 | 1.61E-07 |
| 3.09  | 2.98  | 2.97   | 0.0103 | 0.0105 | 0.0109 | 1.61E-07 |
| 3.47  | 3.37  | 3.52   | 0.0103 | 0.0105 | 0.0109 | 1.61E-07 |
| 0.011 | 0.012 | 0.0117 | 2.86   | 2.99   | 2.91   | 1.72E-07 |
| 2.96  | 2.83  | 2.89   | 0.0103 | 0.0105 | 0.0109 | 1.73E-07 |
| 2.46  | 2.53  | 2.42   | 0.0103 | 0.0105 | 0.0109 | 1.75E-07 |
| 3.02  | 2.91  | 2.9    | 0.0103 | 0.0105 | 0.0109 | 1.77E-07 |
| 3.02  | 2.91  | 2.9    | 0.0103 | 0.0105 | 0.0109 | 1.77E-07 |
| 2.55  | 2.44  | 2.47   | 0.0103 | 0.0105 | 0.0109 | 1.85E-07 |
| 2.79  | 2.87  | 2.92   | 0.0103 | 0.0105 | 0.0109 | 1.87E-07 |
| 2.79  | 2.87  | 2.92   | 0.0103 | 0.0105 | 0.0109 | 1.87E-07 |
| 2.73  | 2.85  | 2.83   | 0.0103 | 0.0105 | 0.0109 | 1.87E-07 |
| 2.73  | 2.85  | 2.83   | 0.0103 | 0.0105 | 0.0109 | 1.87E-07 |
| 3.01  | 2.88  | 2.91   | 0.0103 | 0.0105 | 0.0109 | 1.96E-07 |
| 3.01  | 2.88  | 2.91   | 0.0103 | 0.0105 | 0.0109 | 1.96E-07 |
| 3.01  | 2.88  | 2.91   | 0.0103 | 0.0105 | 0.0109 | 1.96E-07 |
| 2.72  | 2.85  | 2.78   | 0.0103 | 0.0105 | 0.0109 | 2.02E-07 |
| 2.72  | 2.85  | 2.78   | 0.0103 | 0.0105 | 0.0109 | 2.02E-07 |
| 2.15  | 2.25  | 2.18   | 0.0103 | 0.0105 | 0.0109 | 2.03E-07 |
| 3.2   | 3.14  | 3.29   | 0.0103 | 0.0105 | 0.0109 | 2.06E-07 |
| 3.78  | 3.96  | 3.9    | 0.0103 | 0.0105 | 0.0109 | 2.10E-07 |
| 0.011 | 0.012 | 0.0117 | 3.26   | 3.13   | 3.13   | 2.11E-07 |
| 3.95  | 3.79  | 3.79   | 0.0103 | 0.0105 | 0.0109 | 2.25E-07 |
| 0.011 | 0.012 | 0.0117 | 3.21   | 3.32   | 3.17   | 2.25E-07 |
| 0.011 | 0.012 | 0.0117 | 3.21   | 3.32   | 3.17   | 2.25E-07 |
| 2.38  | 2.49  | 2.4    | 0.0103 | 0.0105 | 0.0109 | 2.32E-07 |
| 2.54  | 2.42  | 2.49   | 0.0103 | 0.0105 | 0.0109 | 2.35E-07 |
| 2.54  | 2.42  | 2.49   | 0.0103 | 0.0105 | 0.0109 | 2.35E-07 |
| 2.62  | 2.72  | 2.6    | 0.0103 | 0.0105 | 0.0109 | 2.36E-07 |

|       |       |        |        |        |        |          |
|-------|-------|--------|--------|--------|--------|----------|
| 0.011 | 0.012 | 0.0117 | 2.66   | 2.79   | 2.7    | 2.44E-07 |
| 0.011 | 0.012 | 0.0117 | 2.66   | 2.79   | 2.7    | 2.44E-07 |
| 3.51  | 3.38  | 3.35   | 0.0103 | 0.0105 | 0.0109 | 2.60E-07 |
| 3.34  | 3.51  | 3.41   | 0.0103 | 0.0105 | 0.0109 | 2.63E-07 |
| 0.011 | 0.012 | 0.0117 | 2.68   | 2.69   | 2.57   | 2.71E-07 |
| 0.011 | 0.012 | 0.0117 | 3.16   | 3.16   | 3.3    | 2.73E-07 |
| 3.8   | 3.63  | 3.79   | 0.0103 | 0.0105 | 0.0109 | 2.85E-07 |
| 3.8   | 3.63  | 3.79   | 0.0103 | 0.0105 | 0.0109 | 2.85E-07 |
| 0.011 | 0.012 | 0.0117 | 2.75   | 2.87   | 2.88   | 2.88E-07 |
| 2.52  | 2.52  | 2.41   | 0.0103 | 0.0105 | 0.0109 | 2.90E-07 |
| 2.22  | 2.22  | 2.32   | 0.0103 | 0.0105 | 0.0109 | 2.92E-07 |
| 2.22  | 2.22  | 2.32   | 0.0103 | 0.0105 | 0.0109 | 2.92E-07 |
| 3.93  | 3.86  | 4.06   | 0.0103 | 0.0105 | 0.0109 | 2.93E-07 |
| 0.011 | 0.012 | 0.0117 | 2.01   | 2.11   | 2.03   | 3.02E-07 |
| 2.84  | 2.83  | 2.71   | 0.0103 | 0.0105 | 0.0109 | 3.04E-07 |
| 2.84  | 2.83  | 2.71   | 0.0103 | 0.0105 | 0.0109 | 3.04E-07 |
| 0.011 | 0.012 | 0.0117 | 2.33   | 2.26   | 2.38   | 3.08E-07 |
| 2.77  | 2.64  | 2.66   | 0.0103 | 0.0105 | 0.0109 | 3.10E-07 |
| 2.74  | 2.61  | 2.72   | 0.0103 | 0.0105 | 0.0109 | 3.10E-07 |
| 2.74  | 2.61  | 2.72   | 0.0103 | 0.0105 | 0.0109 | 3.10E-07 |
| 0.011 | 0.012 | 0.0117 | 3.44   | 3.54   | 3.36   | 3.16E-07 |
| 2.54  | 2.45  | 2.58   | 0.0103 | 0.0105 | 0.0109 | 3.28E-07 |
| 2.54  | 2.45  | 2.58   | 0.0103 | 0.0105 | 0.0109 | 3.28E-07 |
| 3.29  | 3.23  | 3.12   | 0.0103 | 0.0105 | 0.0109 | 3.50E-07 |
| 2.12  | 2.23  | 2.21   | 0.0103 | 0.0105 | 0.0109 | 3.50E-07 |
| 2.73  | 2.87  | 2.85   | 0.0103 | 0.0105 | 0.0109 | 3.53E-07 |
| 2.18  | 2.1   | 2.07   | 0.0103 | 0.0105 | 0.0109 | 3.54E-07 |
| 2.15  | 2.27  | 2.21   | 0.0103 | 0.0105 | 0.0109 | 3.69E-07 |
| 2.15  | 2.27  | 2.21   | 0.0103 | 0.0105 | 0.0109 | 3.69E-07 |
| 2.36  | 2.27  | 2.24   | 0.0103 | 0.0105 | 0.0109 | 3.75E-07 |
| 0.011 | 0.012 | 0.0117 | 3.37   | 3.19   | 3.28   | 3.83E-07 |
| 2.47  | 2.6   | 2.58   | 0.0103 | 0.0105 | 0.0109 | 3.84E-07 |
| 2.47  | 2.6   | 2.58   | 0.0103 | 0.0105 | 0.0109 | 3.84E-07 |
| 2.7   | 2.6   | 2.56   | 0.0103 | 0.0105 | 0.0109 | 3.88E-07 |
| 2.7   | 2.6   | 2.56   | 0.0103 | 0.0105 | 0.0109 | 3.88E-07 |
| 2.66  | 2.67  | 2.54   | 0.0103 | 0.0105 | 0.0109 | 3.91E-07 |
| 2.99  | 2.93  | 2.83   | 0.0103 | 0.0105 | 0.0109 | 3.98E-07 |
| 2.99  | 2.93  | 2.83   | 0.0103 | 0.0105 | 0.0109 | 3.98E-07 |
| 2.41  | 2.35  | 2.28   | 0.0103 | 0.0105 | 0.0109 | 4.00E-07 |
| 3.06  | 2.91  | 3.05   | 0.0103 | 0.0105 | 0.0109 | 4.09E-07 |
| 3.06  | 2.91  | 3.05   | 0.0103 | 0.0105 | 0.0109 | 4.09E-07 |
| 3.01  | 2.88  | 2.86   | 0.0103 | 0.0105 | 0.0109 | 4.11E-07 |
| 3.71  | 3.64  | 3.51   | 0.0103 | 0.0105 | 0.0109 | 4.16E-07 |
| 3.71  | 3.64  | 3.51   | 0.0103 | 0.0105 | 0.0109 | 4.16E-07 |
| 3.99  | 3.96  | 4.17   | 0.0103 | 0.0105 | 0.0109 | 4.20E-07 |
| 2.49  | 2.42  | 2.56   | 0.0103 | 0.0105 | 0.0109 | 4.23E-07 |
| 2.24  | 2.15  | 2.27   | 0.0103 | 0.0105 | 0.0109 | 4.25E-07 |
| 0.011 | 0.012 | 0.0117 | 3.29   | 3.19   | 3.11   | 4.28E-07 |
| 2.57  | 2.72  | 2.63   | 0.0103 | 0.0105 | 0.0109 | 4.52E-07 |
| 2.57  | 2.72  | 2.63   | 0.0103 | 0.0105 | 0.0109 | 4.52E-07 |
| 2.57  | 2.72  | 2.63   | 0.0103 | 0.0105 | 0.0109 | 4.52E-07 |
| 2.54  | 2.4   | 2.49   | 0.0103 | 0.0105 | 0.0109 | 4.56E-07 |
| 3     | 2.91  | 2.83   | 0.0103 | 0.0105 | 0.0109 | 4.90E-07 |
| 3     | 2.91  | 2.83   | 0.0103 | 0.0105 | 0.0109 | 4.90E-07 |
| 2.48  | 2.55  | 2.63   | 0.0103 | 0.0105 | 0.0109 | 5.05E-07 |
| 4.08  | 3.95  | 4.19   | 0.0103 | 0.0105 | 0.0109 | 5.09E-07 |
| 0.011 | 0.012 | 0.0117 | 3.24   | 3.09   | 3.07   | 5.22E-07 |
| 3.55  | 3.75  | 3.58   | 0.0103 | 0.0105 | 0.0109 | 5.27E-07 |



|       |       |        |        |        |        |          |
|-------|-------|--------|--------|--------|--------|----------|
| 3.19  | 3.14  | 3.01   | 0.0103 | 0.0105 | 0.0109 | 5.35E-07 |
| 3.19  | 3.14  | 3.01   | 0.0103 | 0.0105 | 0.0109 | 5.35E-07 |
| 0.011 | 0.012 | 0.0117 | 2.49   | 2.39   | 2.35   | 5.44E-07 |
| 3.1   | 3.29  | 3.22   | 0.0103 | 0.0105 | 0.0109 | 5.46E-07 |
| 2.78  | 2.63  | 2.65   | 0.0103 | 0.0105 | 0.0109 | 5.71E-07 |
| 2.78  | 2.63  | 2.65   | 0.0103 | 0.0105 | 0.0109 | 5.71E-07 |
| 3.3   | 3.11  | 3.17   | 0.0103 | 0.0105 | 0.0109 | 5.77E-07 |
| 3.3   | 3.11  | 3.17   | 0.0103 | 0.0105 | 0.0109 | 5.77E-07 |
| 2.54  | 2.57  | 2.69   | 0.0103 | 0.0105 | 0.0109 | 5.87E-07 |
| 2.54  | 2.57  | 2.69   | 0.0103 | 0.0105 | 0.0109 | 5.87E-07 |
| 3.27  | 3.45  | 3.45   | 0.0103 | 0.0105 | 0.0109 | 5.95E-07 |
| 3.05  | 3.04  | 3.21   | 0.0103 | 0.0105 | 0.0109 | 6.05E-07 |
| 3.05  | 3.04  | 3.21   | 0.0103 | 0.0105 | 0.0109 | 6.05E-07 |
| 2.22  | 2.35  | 2.24   | 0.0103 | 0.0105 | 0.0109 | 6.13E-07 |
| 2.83  | 2.91  | 3.01   | 0.0103 | 0.0105 | 0.0109 | 6.17E-07 |
| 4     | 3.77  | 3.95   | 0.0103 | 0.0105 | 0.0109 | 6.18E-07 |
| 4.74  | 4.62  | 4.7    | 2.47   | 2.53   | 2.5    | 6.25E-07 |
| 4.74  | 4.62  | 4.7    | 2.47   | 2.53   | 2.5    | 6.25E-07 |
| 0.011 | 0.012 | 0.0117 | 2.87   | 2.78   | 2.96   | 6.54E-07 |
| 4.76  | 4.98  | 4.69   | 0.0103 | 0.0105 | 0.0109 | 6.57E-07 |
| 2.97  | 2.86  | 2.79   | 0.0103 | 0.0105 | 0.0109 | 6.71E-07 |
| 0.011 | 0.012 | 0.0117 | 4.1    | 3.85   | 4.01   | 6.85E-07 |
| 0.011 | 0.012 | 0.0117 | 4.1    | 3.85   | 4.01   | 6.85E-07 |
| 0.011 | 0.012 | 0.0117 | 4.1    | 3.85   | 4.01   | 6.85E-07 |
| 2.34  | 2.39  | 2.49   | 0.0103 | 0.0105 | 0.0109 | 6.87E-07 |
| 2.34  | 2.39  | 2.49   | 0.0103 | 0.0105 | 0.0109 | 6.87E-07 |
| 0.011 | 0.012 | 0.0117 | 2.86   | 2.93   | 2.75   | 6.98E-07 |
| 2.66  | 2.74  | 2.57   | 0.0103 | 0.0105 | 0.0109 | 7.10E-07 |
| 4.48  | 4.29  | 4.57   | 0.0103 | 0.0105 | 0.0109 | 7.17E-07 |
| 3.76  | 3.88  | 4.01   | 0.0103 | 0.0105 | 0.0109 | 7.23E-07 |
| 3.03  | 2.89  | 2.85   | 0.0103 | 0.0105 | 0.0109 | 7.37E-07 |
| 2.35  | 2.24  | 2.21   | 0.0103 | 0.0105 | 0.0109 | 7.58E-07 |
| 2.8   | 2.64  | 2.79   | 0.0103 | 0.0105 | 0.0109 | 7.70E-07 |
| 2.8   | 2.64  | 2.79   | 0.0103 | 0.0105 | 0.0109 | 7.70E-07 |
| 0.011 | 0.012 | 0.0117 | 2.97   | 3.17   | 3.09   | 7.74E-07 |
| 2.51  | 2.39  | 2.36   | 0.0103 | 0.0105 | 0.0109 | 7.83E-07 |
| 3.74  | 3.51  | 3.57   | 0.0103 | 0.0105 | 0.0109 | 8.06E-07 |
| 2.38  | 2.54  | 2.49   | 0.0103 | 0.0105 | 0.0109 | 8.16E-07 |
| 3     | 2.82  | 2.85   | 0.0103 | 0.0105 | 0.0109 | 8.37E-07 |
| 3     | 2.82  | 2.85   | 0.0103 | 0.0105 | 0.0109 | 8.37E-07 |
| 3     | 2.82  | 2.85   | 0.0103 | 0.0105 | 0.0109 | 8.37E-07 |
| 2.18  | 2.1   | 2.04   | 0.0103 | 0.0105 | 0.0109 | 8.38E-07 |
| 2.18  | 2.1   | 2.04   | 0.0103 | 0.0105 | 0.0109 | 8.38E-07 |
| 2.11  | 2.03  | 2.17   | 0.0103 | 0.0105 | 0.0109 | 8.44E-07 |
| 2.11  | 2.03  | 2.17   | 0.0103 | 0.0105 | 0.0109 | 8.44E-07 |
| 2.3   | 2.2   | 2.35   | 0.0103 | 0.0105 | 0.0109 | 8.48E-07 |
| 2.3   | 2.2   | 2.35   | 0.0103 | 0.0105 | 0.0109 | 8.48E-07 |
| 2.61  | 2.44  | 2.53   | 0.0103 | 0.0105 | 0.0109 | 8.68E-07 |
| 2.02  | 2.02  | 2.14   | 0.0103 | 0.0105 | 0.0109 | 8.69E-07 |
| 2.67  | 2.52  | 2.52   | 0.0103 | 0.0105 | 0.0109 | 8.72E-07 |
| 2.46  | 2.63  | 2.57   | 0.0103 | 0.0105 | 0.0109 | 8.79E-07 |
| 2.75  | 2.72  | 2.58   | 0.0103 | 0.0105 | 0.0109 | 8.83E-07 |
| 2.81  | 2.92  | 2.73   | 0.0103 | 0.0105 | 0.0109 | 8.84E-07 |
| 2.44  | 2.37  | 2.28   | 0.0103 | 0.0105 | 0.0109 | 8.98E-07 |
| 2.44  | 2.37  | 2.28   | 0.0103 | 0.0105 | 0.0109 | 8.98E-07 |
| 3.31  | 3.11  | 3.29   | 0.0103 | 0.0105 | 0.0109 | 9.04E-07 |
| 3.31  | 3.11  | 3.29   | 0.0103 | 0.0105 | 0.0109 | 9.04E-07 |
| 3.13  | 3.18  | 3.34   | 0.0103 | 0.0105 | 0.0109 | 9.11E-07 |

|       |       |        |        |        |        |          |
|-------|-------|--------|--------|--------|--------|----------|
| 3.13  | 3.18  | 3.34   | 0.0103 | 0.0105 | 0.0109 | 9.11E-07 |
| 3.13  | 3.18  | 3.34   | 0.0103 | 0.0105 | 0.0109 | 9.11E-07 |
| 5.06  | 4.82  | 4.74   | 0.0103 | 0.0105 | 0.0109 | 9.15E-07 |
| 0.011 | 0.012 | 0.0117 | 3.85   | 3.66   | 3.91   | 9.30E-07 |
| 0.011 | 0.012 | 0.0117 | 3.85   | 3.66   | 3.91   | 9.30E-07 |
| 0.011 | 0.012 | 0.0117 | 2.67   | 2.66   | 2.51   | 9.37E-07 |
| 0.011 | 0.012 | 0.0117 | 2.67   | 2.66   | 2.51   | 9.37E-07 |
| 4.98  | 4.68  | 4.96   | 0.0103 | 0.0105 | 0.0109 | 9.41E-07 |
| 2.39  | 2.25  | 2.39   | 0.0103 | 0.0105 | 0.0109 | 9.58E-07 |
| 2.11  | 2.01  | 2.15   | 0.0103 | 0.0105 | 0.0109 | 9.62E-07 |
| 2.43  | 2.47  | 2.31   | 0.0103 | 0.0105 | 0.0109 | 9.75E-07 |
| 0.011 | 0.012 | 0.0117 | 2.89   | 2.81   | 3.01   | 9.76E-07 |
| 2.83  | 3.03  | 2.9    | 0.0103 | 0.0105 | 0.0109 | 9.84E-07 |
| 3.04  | 3.15  | 3.26   | 0.0103 | 0.0105 | 0.0109 | 1.00E-06 |
| 3.04  | 3.15  | 3.26   | 0.0103 | 0.0105 | 0.0109 | 1.00E-06 |
| 2.2   | 2.25  | 2.1    | 0.0103 | 0.0105 | 0.0109 | 1.02E-06 |
| 2.2   | 2.25  | 2.1    | 0.0103 | 0.0105 | 0.0109 | 1.02E-06 |
| 2.51  | 2.34  | 2.43   | 0.0103 | 0.0105 | 0.0109 | 1.02E-06 |
| 2.51  | 2.34  | 2.43   | 0.0103 | 0.0105 | 0.0109 | 1.02E-06 |
| 2.39  | 2.27  | 2.43   | 0.0103 | 0.0105 | 0.0109 | 1.04E-06 |
| 0.011 | 0.012 | 0.0117 | 2.56   | 2.72   | 2.56   | 1.06E-06 |
| 3.02  | 3.23  | 3.19   | 0.0103 | 0.0105 | 0.0109 | 1.06E-06 |
| 3.02  | 3.23  | 3.19   | 0.0103 | 0.0105 | 0.0109 | 1.06E-06 |
| 0.011 | 0.012 | 0.0117 | 3.48   | 3.48   | 3.27   | 1.08E-06 |
| 4.38  | 4.12  | 4.39   | 0.0103 | 0.0105 | 0.0109 | 1.08E-06 |
| 0.011 | 0.012 | 0.0117 | 3.1    | 3.32   | 3.27   | 1.10E-06 |
| 2.3   | 2.35  | 2.19   | 0.0103 | 0.0105 | 0.0109 | 1.12E-06 |
| 2.3   | 2.35  | 2.19   | 0.0103 | 0.0105 | 0.0109 | 1.12E-06 |
| 0.011 | 0.012 | 0.0117 | 3.28   | 3.07   | 3.1    | 1.14E-06 |
| 0.011 | 0.012 | 0.0117 | 3.28   | 3.07   | 3.1    | 1.14E-06 |
| 2.29  | 2.18  | 2.34   | 0.0103 | 0.0105 | 0.0109 | 1.15E-06 |
| 2.37  | 2.31  | 2.48   | 0.0103 | 0.0105 | 0.0109 | 1.15E-06 |
| 3.2   | 3.41  | 3.21   | 0.0103 | 0.0105 | 0.0109 | 1.16E-06 |
| 2.16  | 2.31  | 2.29   | 0.0103 | 0.0105 | 0.0109 | 1.16E-06 |
| 2.16  | 2.31  | 2.29   | 0.0103 | 0.0105 | 0.0109 | 1.16E-06 |
| 2.24  | 2.19  | 2.35   | 0.0103 | 0.0105 | 0.0109 | 1.17E-06 |
| 2.15  | 2     | 2.09   | 0.0103 | 0.0105 | 0.0109 | 1.18E-06 |
| 2.15  | 2     | 2.09   | 0.0103 | 0.0105 | 0.0109 | 1.18E-06 |
| 2.06  | 2.19  | 2.2    | 0.0103 | 0.0105 | 0.0109 | 1.18E-06 |
| 2.06  | 2.19  | 2.2    | 0.0103 | 0.0105 | 0.0109 | 1.18E-06 |
| 2.06  | 2.19  | 2.2    | 0.0103 | 0.0105 | 0.0109 | 1.18E-06 |
| 3.25  | 3.25  | 3.46   | 0.0103 | 0.0105 | 0.0109 | 1.20E-06 |
| 4.11  | 3.94  | 4.24   | 0.0103 | 0.0105 | 0.0109 | 1.22E-06 |
| 2.99  | 2.83  | 2.79   | 0.0103 | 0.0105 | 0.0109 | 1.25E-06 |
| 2.26  | 2.17  | 2.1    | 0.0103 | 0.0105 | 0.0109 | 1.25E-06 |
| 3.67  | 3.67  | 3.44   | 0.0103 | 0.0105 | 0.0109 | 1.25E-06 |
| 3.23  | 3.11  | 3      | 0.0103 | 0.0105 | 0.0109 | 1.26E-06 |
| 3.23  | 3.11  | 3      | 0.0103 | 0.0105 | 0.0109 | 1.26E-06 |
| 3.12  | 2.94  | 3.15   | 0.0103 | 0.0105 | 0.0109 | 1.26E-06 |
| 3.12  | 2.94  | 3.15   | 0.0103 | 0.0105 | 0.0109 | 1.26E-06 |
| 2.21  | 2.3   | 2.38   | 0.0103 | 0.0105 | 0.0109 | 1.27E-06 |
| 2.18  | 2.29  | 2.13   | 0.0103 | 0.0105 | 0.0109 | 1.30E-06 |
| 0.011 | 0.012 | 0.0117 | 3.56   | 3.75   | 3.83   | 1.31E-06 |
| 2.5   | 2.32  | 2.41   | 0.0103 | 0.0105 | 0.0109 | 1.32E-06 |
| 2.5   | 2.32  | 2.41   | 0.0103 | 0.0105 | 0.0109 | 1.32E-06 |
| 0.011 | 0.012 | 0.0117 | 2.66   | 2.86   | 2.81   | 1.33E-06 |
| 0.011 | 0.012 | 0.0117 | 2.66   | 2.86   | 2.81   | 1.33E-06 |
| 3.33  | 3.31  | 3.54   | 0.0103 | 0.0105 | 0.0109 | 1.34E-06 |

|       |       |        |        |        |        |          |
|-------|-------|--------|--------|--------|--------|----------|
| 3.33  | 3.31  | 3.54   | 0.0103 | 0.0105 | 0.0109 | 1.34E-06 |
| 3.33  | 3.31  | 3.54   | 0.0103 | 0.0105 | 0.0109 | 1.34E-06 |
| 2.33  | 2.46  | 2.29   | 0.0103 | 0.0105 | 0.0109 | 1.36E-06 |
| 2.33  | 2.46  | 2.29   | 0.0103 | 0.0105 | 0.0109 | 1.36E-06 |
| 2.96  | 2.78  | 2.77   | 0.0103 | 0.0105 | 0.0109 | 1.36E-06 |
| 0.011 | 0.012 | 0.0117 | 2.89   | 2.79   | 2.68   | 1.36E-06 |
| 2.45  | 2.33  | 2.51   | 0.0103 | 0.0105 | 0.0109 | 1.37E-06 |
| 2.76  | 2.61  | 2.57   | 0.0103 | 0.0105 | 0.0109 | 1.39E-06 |
| 3.06  | 2.92  | 2.84   | 0.0103 | 0.0105 | 0.0109 | 1.39E-06 |
| 3.06  | 2.92  | 2.84   | 0.0103 | 0.0105 | 0.0109 | 1.39E-06 |
| 2.58  | 2.41  | 2.57   | 0.0103 | 0.0105 | 0.0109 | 1.39E-06 |
| 2.73  | 2.55  | 2.72   | 0.0103 | 0.0105 | 0.0109 | 1.40E-06 |
| 2.73  | 2.55  | 2.72   | 0.0103 | 0.0105 | 0.0109 | 1.40E-06 |
| 2.26  | 2.41  | 2.42   | 0.0103 | 0.0105 | 0.0109 | 1.40E-06 |
| 2.26  | 2.41  | 2.42   | 0.0103 | 0.0105 | 0.0109 | 1.40E-06 |
| 2.64  | 2.58  | 2.45   | 0.0103 | 0.0105 | 0.0109 | 1.41E-06 |
| 2.64  | 2.58  | 2.45   | 0.0103 | 0.0105 | 0.0109 | 1.41E-06 |
| 2.54  | 2.41  | 2.36   | 0.0103 | 0.0105 | 0.0109 | 1.43E-06 |
| 2.54  | 2.41  | 2.36   | 0.0103 | 0.0105 | 0.0109 | 1.43E-06 |
| 2.14  | 2.31  | 2.24   | 0.0103 | 0.0105 | 0.0109 | 1.46E-06 |
| 2.14  | 2.31  | 2.24   | 0.0103 | 0.0105 | 0.0109 | 1.46E-06 |
| 2.35  | 2.35  | 2.51   | 0.0103 | 0.0105 | 0.0109 | 1.48E-06 |
| 0.011 | 0.012 | 0.0117 | 3.54   | 3.72   | 3.45   | 1.48E-06 |
| 4.9   | 4.88  | 4.57   | 0.0103 | 0.0105 | 0.0109 | 1.50E-06 |
| 2.26  | 2.1   | 2.23   | 0.0103 | 0.0105 | 0.0109 | 1.52E-06 |
| 2.26  | 2.1   | 2.23   | 0.0103 | 0.0105 | 0.0109 | 1.52E-06 |
| 2.26  | 2.1   | 2.23   | 0.0103 | 0.0105 | 0.0109 | 1.52E-06 |
| 2.75  | 2.69  | 2.9    | 0.0103 | 0.0105 | 0.0109 | 1.55E-06 |
| 2.75  | 2.69  | 2.9    | 0.0103 | 0.0105 | 0.0109 | 1.55E-06 |
| 3.47  | 3.63  | 3.36   | 0.0103 | 0.0105 | 0.0109 | 1.55E-06 |
| 0.011 | 0.012 | 0.0117 | 2.23   | 2.31   | 2.41   | 1.56E-06 |
| 0.011 | 0.012 | 0.0117 | 2.23   | 2.31   | 2.41   | 1.56E-06 |
| 2.58  | 2.51  | 2.71   | 0.0103 | 0.0105 | 0.0109 | 1.57E-06 |
| 2.58  | 2.51  | 2.71   | 0.0103 | 0.0105 | 0.0109 | 1.57E-06 |
| 2.18  | 2.11  | 2.28   | 0.0103 | 0.0105 | 0.0109 | 1.57E-06 |
| 3.32  | 3.22  | 3.48   | 0.0103 | 0.0105 | 0.0109 | 1.60E-06 |
| 3.14  | 3.32  | 3.39   | 0.0103 | 0.0105 | 0.0109 | 1.60E-06 |
| 2.55  | 2.44  | 2.64   | 0.0103 | 0.0105 | 0.0109 | 1.63E-06 |
| 2.55  | 2.44  | 2.64   | 0.0103 | 0.0105 | 0.0109 | 1.63E-06 |
| 2.32  | 2.43  | 2.51   | 0.0103 | 0.0105 | 0.0109 | 1.63E-06 |
| 2.32  | 2.43  | 2.51   | 0.0103 | 0.0105 | 0.0109 | 1.63E-06 |
| 3.83  | 3.57  | 3.59   | 0.0103 | 0.0105 | 0.0109 | 1.64E-06 |
| 3.51  | 3.25  | 3.33   | 0.0103 | 0.0105 | 0.0109 | 1.65E-06 |
| 2.48  | 2.68  | 2.62   | 0.0103 | 0.0105 | 0.0109 | 1.66E-06 |
| 3.1   | 2.87  | 2.94   | 0.0103 | 0.0105 | 0.0109 | 1.67E-06 |
| 2.51  | 2.35  | 2.34   | 0.0103 | 0.0105 | 0.0109 | 1.69E-06 |
| 2.51  | 2.35  | 2.34   | 0.0103 | 0.0105 | 0.0109 | 1.69E-06 |
| 2.76  | 2.63  | 2.55   | 0.0103 | 0.0105 | 0.0109 | 1.74E-06 |
| 2.76  | 2.63  | 2.55   | 0.0103 | 0.0105 | 0.0109 | 1.74E-06 |
| 2.4   | 2.6   | 2.49   | 0.0103 | 0.0105 | 0.0109 | 1.75E-06 |
| 2.3   | 2.49  | 2.37   | 0.0103 | 0.0105 | 0.0109 | 1.78E-06 |
| 3.33  | 3.09  | 3.13   | 0.0103 | 0.0105 | 0.0109 | 1.79E-06 |
| 3.33  | 3.09  | 3.13   | 0.0103 | 0.0105 | 0.0109 | 1.79E-06 |
| 3.33  | 3.09  | 3.13   | 0.0103 | 0.0105 | 0.0109 | 1.79E-06 |
| 2.69  | 2.85  | 2.91   | 0.0103 | 0.0105 | 0.0109 | 1.79E-06 |
| 2.69  | 2.85  | 2.91   | 0.0103 | 0.0105 | 0.0109 | 1.79E-06 |
| 2.72  | 2.51  | 2.6    | 0.0103 | 0.0105 | 0.0109 | 1.79E-06 |
| 3.14  | 2.93  | 3.15   | 0.0103 | 0.0105 | 0.0109 | 1.80E-06 |

|       |       |        |        |        |        |          |
|-------|-------|--------|--------|--------|--------|----------|
| 3.14  | 2.93  | 3.15   | 0.0103 | 0.0105 | 0.0109 | 1.80E-06 |
| 2.72  | 2.78  | 2.94   | 0.0103 | 0.0105 | 0.0109 | 1.80E-06 |
| 2.49  | 2.7   | 2.6    | 0.0103 | 0.0105 | 0.0109 | 1.81E-06 |
| 2.49  | 2.7   | 2.6    | 0.0103 | 0.0105 | 0.0109 | 1.81E-06 |
| 2.57  | 2.77  | 2.6    | 0.0103 | 0.0105 | 0.0109 | 1.86E-06 |
| 2.57  | 2.77  | 2.6    | 0.0103 | 0.0105 | 0.0109 | 1.86E-06 |
| 2.23  | 2.42  | 2.35   | 0.0103 | 0.0105 | 0.0109 | 1.95E-06 |
| 2.87  | 3.08  | 3.09   | 0.0103 | 0.0105 | 0.0109 | 1.95E-06 |
| 2.87  | 3.08  | 3.09   | 0.0103 | 0.0105 | 0.0109 | 1.95E-06 |
| 2.89  | 3.07  | 2.84   | 0.0103 | 0.0105 | 0.0109 | 1.95E-06 |
| 2.89  | 3.07  | 2.84   | 0.0103 | 0.0105 | 0.0109 | 1.95E-06 |
| 2.46  | 2.6   | 2.4    | 0.0103 | 0.0105 | 0.0109 | 1.96E-06 |
| 2.46  | 2.6   | 2.4    | 0.0103 | 0.0105 | 0.0109 | 1.96E-06 |
| 0.011 | 0.012 | 0.0117 | 2.9    | 2.7    | 2.91   | 2.05E-06 |
| 2.55  | 2.38  | 2.57   | 0.0103 | 0.0105 | 0.0109 | 2.05E-06 |
| 3.83  | 3.53  | 3.75   | 0.0103 | 0.0105 | 0.0109 | 2.08E-06 |
| 3.72  | 3.57  | 3.42   | 0.0103 | 0.0105 | 0.0109 | 2.09E-06 |
| 3.21  | 2.96  | 3.15   | 0.0103 | 0.0105 | 0.0109 | 2.10E-06 |
| 3.21  | 2.96  | 3.15   | 0.0103 | 0.0105 | 0.0109 | 2.10E-06 |
| 3.21  | 2.96  | 3.15   | 0.0103 | 0.0105 | 0.0109 | 2.10E-06 |
| 3.21  | 2.96  | 3.15   | 0.0103 | 0.0105 | 0.0109 | 2.10E-06 |
| 3.4   | 3.15  | 3.18   | 0.0103 | 0.0105 | 0.0109 | 2.11E-06 |
| 3.4   | 3.15  | 3.18   | 0.0103 | 0.0105 | 0.0109 | 2.11E-06 |
| 2.74  | 2.52  | 2.66   | 0.0103 | 0.0105 | 0.0109 | 2.14E-06 |
| 0.011 | 0.012 | 0.0117 | 2.3    | 2.49   | 2.34   | 2.14E-06 |
| 0.011 | 0.012 | 0.0117 | 2.3    | 2.49   | 2.34   | 2.14E-06 |
| 2.84  | 2.61  | 2.72   | 0.0103 | 0.0105 | 0.0109 | 2.15E-06 |
| 2.64  | 2.82  | 2.86   | 0.0103 | 0.0105 | 0.0109 | 2.15E-06 |
| 2.64  | 2.82  | 2.86   | 0.0103 | 0.0105 | 0.0109 | 2.15E-06 |
| 2.64  | 2.82  | 2.86   | 0.0103 | 0.0105 | 0.0109 | 2.15E-06 |
| 3.32  | 3.29  | 3.07   | 0.0103 | 0.0105 | 0.0109 | 2.15E-06 |
| 3.32  | 3.29  | 3.07   | 0.0103 | 0.0105 | 0.0109 | 2.15E-06 |
| 0.011 | 0.012 | 0.0117 | 2.52   | 2.52   | 2.34   | 2.16E-06 |
| 0.011 | 0.012 | 0.0117 | 2.52   | 2.52   | 2.34   | 2.16E-06 |
| 3.04  | 3.09  | 2.85   | 0.0103 | 0.0105 | 0.0109 | 2.16E-06 |
| 2.93  | 2.73  | 2.95   | 0.0103 | 0.0105 | 0.0109 | 2.18E-06 |
| 2.16  | 2.35  | 2.24   | 0.0103 | 0.0105 | 0.0109 | 2.19E-06 |
| 3.14  | 2.93  | 3.17   | 0.0103 | 0.0105 | 0.0109 | 2.19E-06 |
| 0.011 | 0.012 | 0.0117 | 2.71   | 2.59   | 2.82   | 2.20E-06 |
| 3.07  | 3.18  | 2.92   | 0.0103 | 0.0105 | 0.0109 | 2.24E-06 |
| 3.07  | 3.18  | 2.92   | 0.0103 | 0.0105 | 0.0109 | 2.24E-06 |
| 3.04  | 3.3   | 3.11   | 0.0103 | 0.0105 | 0.0109 | 2.24E-06 |
| 3.04  | 3.3   | 3.11   | 0.0103 | 0.0105 | 0.0109 | 2.24E-06 |
| 2.97  | 2.79  | 2.74   | 0.0103 | 0.0105 | 0.0109 | 2.24E-06 |
| 2.97  | 2.79  | 2.74   | 0.0103 | 0.0105 | 0.0109 | 2.24E-06 |
| 2.56  | 2.79  | 2.67   | 0.0103 | 0.0105 | 0.0109 | 2.31E-06 |
| 2.56  | 2.79  | 2.67   | 0.0103 | 0.0105 | 0.0109 | 2.31E-06 |
| 0.011 | 0.012 | 0.0117 | 2.35   | 2.2    | 2.17   | 2.33E-06 |
| 3.99  | 3.66  | 3.82   | 0.0103 | 0.0105 | 0.0109 | 2.33E-06 |
| 0.011 | 0.012 | 0.0117 | 2.6    | 2.68   | 2.46   | 2.35E-06 |
| 0.011 | 0.012 | 0.0117 | 2.6    | 2.68   | 2.46   | 2.35E-06 |
| 2.44  | 2.53  | 2.32   | 0.0103 | 0.0105 | 0.0109 | 2.39E-06 |
| 0.011 | 0.012 | 0.0117 | 3.1    | 3.34   | 3.1    | 2.43E-06 |
| 0.011 | 0.012 | 0.0117 | 3.1    | 3.34   | 3.1    | 2.43E-06 |
| 2.63  | 2.52  | 2.41   | 0.0103 | 0.0105 | 0.0109 | 2.45E-06 |
| 2.63  | 2.52  | 2.41   | 0.0103 | 0.0105 | 0.0109 | 2.45E-06 |
| 3.67  | 3.39  | 3.65   | 0.0103 | 0.0105 | 0.0109 | 2.46E-06 |
| 3.67  | 3.39  | 3.65   | 0.0103 | 0.0105 | 0.0109 | 2.46E-06 |

|       |       |        |        |        |        |          |
|-------|-------|--------|--------|--------|--------|----------|
| 3.67  | 3.39  | 3.65   | 0.0103 | 0.0105 | 0.0109 | 2.46E-06 |
| 3.93  | 3.91  | 3.63   | 0.0103 | 0.0105 | 0.0109 | 2.49E-06 |
| 3.93  | 3.91  | 3.63   | 0.0103 | 0.0105 | 0.0109 | 2.49E-06 |
| 2.28  | 2.19  | 2.39   | 0.0103 | 0.0105 | 0.0109 | 2.49E-06 |
| 2.72  | 2.5   | 2.67   | 0.0103 | 0.0105 | 0.0109 | 2.49E-06 |
| 2.72  | 2.5   | 2.67   | 0.0103 | 0.0105 | 0.0109 | 2.49E-06 |
| 2.16  | 2.08  | 2.27   | 0.0103 | 0.0105 | 0.0109 | 2.53E-06 |
| 2.16  | 2.08  | 2.27   | 0.0103 | 0.0105 | 0.0109 | 2.53E-06 |
| 2.88  | 3.12  | 2.91   | 0.0103 | 0.0105 | 0.0109 | 2.53E-06 |
| 2.2   | 2.15  | 2.34   | 0.0103 | 0.0105 | 0.0109 | 2.57E-06 |
| 2.38  | 2.23  | 2.19   | 0.0103 | 0.0105 | 0.0109 | 2.58E-06 |
| 2.41  | 2.41  | 2.23   | 0.0103 | 0.0105 | 0.0109 | 2.58E-06 |
| 2.48  | 2.47  | 2.29   | 0.0103 | 0.0105 | 0.0109 | 2.60E-06 |
| 0.011 | 0.012 | 0.0117 | 2.63   | 2.49   | 2.41   | 2.62E-06 |
| 2.37  | 2.47  | 2.26   | 0.0103 | 0.0105 | 0.0109 | 2.62E-06 |
| 2.99  | 3.25  | 3.21   | 0.0103 | 0.0105 | 0.0109 | 2.62E-06 |
| 2.88  | 2.64  | 2.81   | 0.0103 | 0.0105 | 0.0109 | 2.63E-06 |
| 2.88  | 2.64  | 2.81   | 0.0103 | 0.0105 | 0.0109 | 2.63E-06 |
| 2.88  | 2.64  | 2.81   | 0.0103 | 0.0105 | 0.0109 | 2.63E-06 |
| 4.94  | 5.32  | 4.92   | 0.0103 | 0.0105 | 0.0109 | 2.63E-06 |
| 4.94  | 5.32  | 4.92   | 0.0103 | 0.0105 | 0.0109 | 2.63E-06 |
| 4.94  | 5.32  | 4.92   | 0.0103 | 0.0105 | 0.0109 | 2.63E-06 |
| 3.14  | 2.96  | 2.88   | 0.0103 | 0.0105 | 0.0109 | 2.64E-06 |
| 0.011 | 0.012 | 0.0117 | 2.15   | 2.32   | 2.15   | 2.65E-06 |
| 0.011 | 0.012 | 0.0117 | 2.15   | 2.32   | 2.15   | 2.65E-06 |
| 2.15  | 2.23  | 2.04   | 0.0103 | 0.0105 | 0.0109 | 2.67E-06 |
| 2.15  | 2.23  | 2.04   | 0.0103 | 0.0105 | 0.0109 | 2.67E-06 |
| 2.02  | 2.04  | 2.19   | 0.0103 | 0.0105 | 0.0109 | 2.68E-06 |
| 2.02  | 2.04  | 2.19   | 0.0103 | 0.0105 | 0.0109 | 2.68E-06 |
| 4.49  | 4.22  | 4.12   | 0.0103 | 0.0105 | 0.0109 | 2.69E-06 |
| 4.91  | 4.63  | 5.06   | 0.0103 | 0.0105 | 0.0109 | 2.71E-06 |
| 4.91  | 4.63  | 5.06   | 0.0103 | 0.0105 | 0.0109 | 2.71E-06 |
| 0.011 | 0.012 | 0.0117 | 2.74   | 2.92   | 2.68   | 2.75E-06 |
| 0.011 | 0.012 | 0.0117 | 2.74   | 2.92   | 2.68   | 2.75E-06 |
| 2.43  | 2.28  | 2.49   | 0.0103 | 0.0105 | 0.0109 | 2.79E-06 |
| 3.3   | 3.61  | 3.43   | 0.0103 | 0.0105 | 0.0109 | 2.80E-06 |
| 3.71  | 3.58  | 3.39   | 0.0103 | 0.0105 | 0.0109 | 2.80E-06 |
| 3.71  | 3.58  | 3.39   | 0.0103 | 0.0105 | 0.0109 | 2.80E-06 |
| 2.51  | 2.31  | 2.34   | 0.0103 | 0.0105 | 0.0109 | 2.82E-06 |
| 0.011 | 0.012 | 0.0117 | 2.5    | 2.69   | 2.72   | 2.83E-06 |
| 0.011 | 0.012 | 0.0117 | 2.5    | 2.69   | 2.72   | 2.83E-06 |
| 3.78  | 3.5   | 3.8    | 0.0103 | 0.0105 | 0.0109 | 2.86E-06 |
| 3.78  | 3.5   | 3.8    | 0.0103 | 0.0105 | 0.0109 | 2.86E-06 |
| 0.011 | 0.012 | 0.0117 | 2.78   | 2.54   | 2.64   | 2.88E-06 |
| 0.011 | 0.012 | 0.0117 | 2.49   | 2.56   | 2.72   | 2.90E-06 |
| 2.28  | 2.29  | 2.47   | 0.0103 | 0.0105 | 0.0109 | 2.91E-06 |
| 2.66  | 2.44  | 2.49   | 0.0103 | 0.0105 | 0.0109 | 2.91E-06 |
| 2.66  | 2.44  | 2.49   | 0.0103 | 0.0105 | 0.0109 | 2.91E-06 |
| 2.97  | 3.09  | 2.82   | 0.0103 | 0.0105 | 0.0109 | 2.94E-06 |
| 2.62  | 2.73  | 2.87   | 0.0103 | 0.0105 | 0.0109 | 2.95E-06 |
| 4.25  | 4.07  | 4.46   | 0.0103 | 0.0105 | 0.0109 | 2.95E-06 |
| 2.57  | 2.78  | 2.79   | 0.0103 | 0.0105 | 0.0109 | 2.96E-06 |
| 2.96  | 2.81  | 3.08   | 0.0103 | 0.0105 | 0.0109 | 2.98E-06 |
| 2.96  | 2.81  | 3.08   | 0.0103 | 0.0105 | 0.0109 | 2.98E-06 |
| 0.011 | 0.012 | 0.0117 | 2.51   | 2.42   | 2.29   | 3.02E-06 |
| 4.5   | 4.56  | 4.9    | 0.0103 | 0.0105 | 0.0109 | 3.09E-06 |
| 3.6   | 3.85  | 3.94   | 0.0103 | 0.0105 | 0.0109 | 3.11E-06 |
| 3.6   | 3.85  | 3.94   | 0.0103 | 0.0105 | 0.0109 | 3.11E-06 |

|       |       |        |        |        |        |          |
|-------|-------|--------|--------|--------|--------|----------|
| 3.6   | 3.85  | 3.94   | 0.0103 | 0.0105 | 0.0109 | 3.11E-06 |
| 2.58  | 2.37  | 2.4    | 0.0103 | 0.0105 | 0.0109 | 3.12E-06 |
| 0.011 | 0.012 | 0.0117 | 2.63   | 2.42   | 2.44   | 3.14E-06 |
| 3.78  | 3.75  | 3.47   | 0.0103 | 0.0105 | 0.0109 | 3.17E-06 |
| 2.24  | 2.04  | 2.14   | 0.0103 | 0.0105 | 0.0109 | 3.23E-06 |
| 2.45  | 2.51  | 2.68   | 0.0103 | 0.0105 | 0.0109 | 3.25E-06 |
| 2.59  | 2.38  | 2.58   | 0.0103 | 0.0105 | 0.0109 | 3.31E-06 |
| 2.36  | 2.2   | 2.41   | 0.0103 | 0.0105 | 0.0109 | 3.36E-06 |
| 2.36  | 2.2   | 2.41   | 0.0103 | 0.0105 | 0.0109 | 3.36E-06 |
| 3.12  | 2.94  | 3.23   | 0.0103 | 0.0105 | 0.0109 | 3.36E-06 |
| 3.12  | 2.94  | 3.23   | 0.0103 | 0.0105 | 0.0109 | 3.36E-06 |
| 0.011 | 0.012 | 0.0117 | 3.26   | 3.36   | 3.06   | 3.38E-06 |
| 2.36  | 2.57  | 2.56   | 0.0103 | 0.0105 | 0.0109 | 3.42E-06 |
| 2.88  | 3.12  | 3.14   | 0.0103 | 0.0105 | 0.0109 | 3.42E-06 |
| 3.14  | 3.2   | 2.92   | 0.0103 | 0.0105 | 0.0109 | 3.50E-06 |
| 3.14  | 3.2   | 2.92   | 0.0103 | 0.0105 | 0.0109 | 3.50E-06 |
| 3.14  | 3.2   | 2.92   | 0.0103 | 0.0105 | 0.0109 | 3.50E-06 |
| 0.011 | 0.012 | 0.0117 | 2.53   | 2.44   | 2.3    | 3.54E-06 |
| 2.25  | 2.47  | 2.41   | 0.0103 | 0.0105 | 0.0109 | 3.54E-06 |
| 2.61  | 2.4   | 2.41   | 0.0103 | 0.0105 | 0.0109 | 3.55E-06 |
| 3.15  | 2.98  | 3.28   | 0.0103 | 0.0105 | 0.0109 | 3.56E-06 |
| 2.2   | 2.34  | 2.42   | 0.0103 | 0.0105 | 0.0109 | 3.59E-06 |
| 4.32  | 4.24  | 4.64   | 0.0103 | 0.0105 | 0.0109 | 3.59E-06 |
| 3.03  | 3.02  | 2.78   | 0.0103 | 0.0105 | 0.0109 | 3.60E-06 |
| 2.69  | 2.46  | 2.5    | 0.0103 | 0.0105 | 0.0109 | 3.64E-06 |
| 3.52  | 3.32  | 3.2    | 0.0103 | 0.0105 | 0.0109 | 3.66E-06 |
| 2.96  | 2.91  | 2.7    | 0.0103 | 0.0105 | 0.0109 | 3.66E-06 |
| 2.96  | 2.91  | 2.7    | 0.0103 | 0.0105 | 0.0109 | 3.66E-06 |
| 3.36  | 3.51  | 3.7    | 0.0103 | 0.0105 | 0.0109 | 3.67E-06 |
| 0.011 | 0.012 | 0.0117 | 2.25   | 2.48   | 2.37   | 3.78E-06 |
| 0.011 | 0.012 | 0.0117 | 2.74   | 2.9    | 3.02   | 3.78E-06 |
| 3.24  | 3.12  | 2.94   | 0.0103 | 0.0105 | 0.0109 | 3.78E-06 |
| 3.24  | 3.12  | 2.94   | 0.0103 | 0.0105 | 0.0109 | 3.78E-06 |
| 2.79  | 2.97  | 2.7    | 0.0103 | 0.0105 | 0.0109 | 3.80E-06 |
| 2.68  | 2.5   | 2.75   | 0.0103 | 0.0105 | 0.0109 | 3.82E-06 |
| 2.68  | 2.5   | 2.75   | 0.0103 | 0.0105 | 0.0109 | 3.82E-06 |
| 3.23  | 3.52  | 3.52   | 0.0103 | 0.0105 | 0.0109 | 3.84E-06 |
| 3.23  | 3.52  | 3.52   | 0.0103 | 0.0105 | 0.0109 | 3.84E-06 |
| 2.34  | 2.45  | 2.58   | 0.0103 | 0.0105 | 0.0109 | 3.86E-06 |
| 2.34  | 2.45  | 2.58   | 0.0103 | 0.0105 | 0.0109 | 3.86E-06 |
| 2.41  | 2.26  | 2.49   | 0.0103 | 0.0105 | 0.0109 | 3.87E-06 |
| 2.41  | 2.26  | 2.49   | 0.0103 | 0.0105 | 0.0109 | 3.87E-06 |
| 4.31  | 4.01  | 3.93   | 0.0103 | 0.0105 | 0.0109 | 3.88E-06 |
| 2.45  | 2.57  | 2.33   | 0.0103 | 0.0105 | 0.0109 | 3.88E-06 |
| 3.2   | 2.91  | 3.13   | 0.0103 | 0.0105 | 0.0109 | 3.92E-06 |
| 3.2   | 2.91  | 3.13   | 0.0103 | 0.0105 | 0.0109 | 3.92E-06 |
| 3.05  | 3.11  | 2.83   | 0.0103 | 0.0105 | 0.0109 | 3.94E-06 |
| 3.05  | 3.11  | 2.83   | 0.0103 | 0.0105 | 0.0109 | 3.94E-06 |
| 0.011 | 0.012 | 0.0117 | 3.69   | 3.41   | 3.74   | 3.94E-06 |
| 2.48  | 2.28  | 2.28   | 0.0103 | 0.0105 | 0.0109 | 3.96E-06 |
| 2.48  | 2.28  | 2.28   | 0.0103 | 0.0105 | 0.0109 | 3.96E-06 |
| 0.011 | 0.012 | 0.0117 | 2.15   | 2.12   | 1.96   | 3.97E-06 |
| 0.011 | 0.012 | 0.0117 | 2.15   | 2.12   | 1.96   | 3.97E-06 |
| 0.011 | 0.012 | 0.0117 | 4.46   | 4.54   | 4.89   | 3.99E-06 |
| 2.31  | 2.42  | 2.55   | 0.0103 | 0.0105 | 0.0109 | 4.05E-06 |
| 2.62  | 2.6   | 2.84   | 0.0103 | 0.0105 | 0.0109 | 4.07E-06 |
| 3.95  | 4.27  | 4.34   | 0.0103 | 0.0105 | 0.0109 | 4.07E-06 |
| 2.23  | 2.32  | 2.46   | 0.0103 | 0.0105 | 0.0109 | 4.09E-06 |

|       |       |        |        |        |        |          |
|-------|-------|--------|--------|--------|--------|----------|
| 2.23  | 2.32  | 2.46   | 0.0103 | 0.0105 | 0.0109 | 4.09E-06 |
| 2.24  | 2.42  | 2.21   | 0.0103 | 0.0105 | 0.0109 | 4.09E-06 |
| 2.24  | 2.42  | 2.21   | 0.0103 | 0.0105 | 0.0109 | 4.09E-06 |
| 4.23  | 4.37  | 3.96   | 0.0103 | 0.0105 | 0.0109 | 4.11E-06 |
| 4.13  | 4.32  | 3.91   | 0.0103 | 0.0105 | 0.0109 | 4.12E-06 |
| 4.13  | 4.32  | 3.91   | 0.0103 | 0.0105 | 0.0109 | 4.12E-06 |
| 4.13  | 4.32  | 3.91   | 0.0103 | 0.0105 | 0.0109 | 4.12E-06 |
| 2.2   | 2.31  | 2.43   | 0.0103 | 0.0105 | 0.0109 | 4.13E-06 |
| 2.61  | 2.38  | 2.42   | 0.0103 | 0.0105 | 0.0109 | 4.13E-06 |
| 2.53  | 2.36  | 2.3    | 0.0103 | 0.0105 | 0.0109 | 4.14E-06 |
| 2.53  | 2.36  | 2.3    | 0.0103 | 0.0105 | 0.0109 | 4.14E-06 |
| 2.53  | 2.36  | 2.3    | 0.0103 | 0.0105 | 0.0109 | 4.14E-06 |
| 3.63  | 3.29  | 3.52   | 0.0103 | 0.0105 | 0.0109 | 4.15E-06 |
| 2.58  | 2.85  | 2.74   | 0.0103 | 0.0105 | 0.0109 | 4.16E-06 |
| 0.011 | 0.012 | 0.0117 | 3.12   | 3.36   | 3.06   | 4.18E-06 |
| 2.7   | 2.5   | 2.75   | 0.0103 | 0.0105 | 0.0109 | 4.18E-06 |
| 2.7   | 2.5   | 2.75   | 0.0103 | 0.0105 | 0.0109 | 4.18E-06 |
| 2.55  | 2.8   | 2.6    | 0.0103 | 0.0105 | 0.0109 | 4.18E-06 |
| 2.5   | 2.39  | 2.64   | 0.0103 | 0.0105 | 0.0109 | 4.19E-06 |
| 2.5   | 2.39  | 2.64   | 0.0103 | 0.0105 | 0.0109 | 4.19E-06 |
| 2.5   | 2.39  | 2.64   | 0.0103 | 0.0105 | 0.0109 | 4.19E-06 |
| 0.011 | 0.012 | 0.0117 | 3.37   | 3.07   | 3.33   | 4.21E-06 |
| 3.06  | 2.77  | 2.89   | 0.0103 | 0.0105 | 0.0109 | 4.25E-06 |
| 4.18  | 4.26  | 3.87   | 0.0103 | 0.0105 | 0.0109 | 4.25E-06 |
| 2.85  | 2.58  | 2.69   | 0.0103 | 0.0105 | 0.0109 | 4.26E-06 |
| 3.1   | 2.85  | 2.84   | 0.0103 | 0.0105 | 0.0109 | 4.30E-06 |
| 2.71  | 2.45  | 2.58   | 0.0103 | 0.0105 | 0.0109 | 4.34E-06 |
| 3.13  | 2.97  | 2.83   | 0.0103 | 0.0105 | 0.0109 | 4.35E-06 |
| 3.13  | 2.97  | 2.83   | 0.0103 | 0.0105 | 0.0109 | 4.35E-06 |
| 3.13  | 2.97  | 2.83   | 0.0103 | 0.0105 | 0.0109 | 4.35E-06 |
| 0.011 | 0.012 | 0.0117 | 2.92   | 2.8    | 2.64   | 4.35E-06 |
| 2.36  | 2.51  | 2.61   | 0.0103 | 0.0105 | 0.0109 | 4.37E-06 |
| 0.011 | 0.012 | 0.0117 | 2.66   | 2.59   | 2.41   | 4.39E-06 |
| 0.011 | 0.012 | 0.0117 | 3.05   | 2.78   | 2.82   | 4.39E-06 |
| 3.02  | 2.77  | 2.77   | 0.0103 | 0.0105 | 0.0109 | 4.41E-06 |
| 3.02  | 2.77  | 2.77   | 0.0103 | 0.0105 | 0.0109 | 4.41E-06 |
| 2.76  | 2.92  | 2.64   | 0.0103 | 0.0105 | 0.0109 | 4.43E-06 |
| 2.76  | 2.92  | 2.64   | 0.0103 | 0.0105 | 0.0109 | 4.43E-06 |
| 2.38  | 2.61  | 2.41   | 0.0103 | 0.0105 | 0.0109 | 4.45E-06 |
| 2.33  | 2.56  | 2.37   | 0.0103 | 0.0105 | 0.0109 | 4.48E-06 |
| 2.26  | 2.5   | 2.36   | 0.0103 | 0.0105 | 0.0109 | 4.49E-06 |
| 2.26  | 2.5   | 2.36   | 0.0103 | 0.0105 | 0.0109 | 4.49E-06 |
| 2.26  | 2.5   | 2.36   | 0.0103 | 0.0105 | 0.0109 | 4.49E-06 |
| 2.33  | 2.47  | 2.58   | 0.0103 | 0.0105 | 0.0109 | 4.54E-06 |
| 2.49  | 2.74  | 2.54   | 0.0103 | 0.0105 | 0.0109 | 4.59E-06 |
| 0.011 | 0.012 | 0.0117 | 3.41   | 3.18   | 3.09   | 4.60E-06 |
| 0.011 | 0.012 | 0.0117 | 3.41   | 3.18   | 3.09   | 4.60E-06 |
| 2.17  | 2.33  | 2.4    | 0.0103 | 0.0105 | 0.0109 | 4.66E-06 |
| 2.15  | 2.38  | 2.3    | 0.0103 | 0.0105 | 0.0109 | 4.67E-06 |
| 3.24  | 3.4   | 3.59   | 0.0103 | 0.0105 | 0.0109 | 4.68E-06 |
| 2.76  | 2.49  | 2.62   | 0.0103 | 0.0105 | 0.0109 | 4.73E-06 |
| 3.63  | 3.32  | 3.64   | 0.0103 | 0.0105 | 0.0109 | 4.73E-06 |
| 0.011 | 0.012 | 0.0117 | 2.35   | 2.12   | 2.24   | 4.73E-06 |
| 3.11  | 3.11  | 2.84   | 0.0103 | 0.0105 | 0.0109 | 4.77E-06 |
| 2.13  | 2.25  | 2.03   | 0.0103 | 0.0105 | 0.0109 | 4.77E-06 |
| 3.05  | 2.98  | 2.76   | 0.0103 | 0.0105 | 0.0109 | 4.78E-06 |
| 3.05  | 2.98  | 2.76   | 0.0103 | 0.0105 | 0.0109 | 4.78E-06 |
| 3.05  | 2.98  | 2.76   | 0.0103 | 0.0105 | 0.0109 | 4.78E-06 |

|       |       |        |        |        |        |          |
|-------|-------|--------|--------|--------|--------|----------|
| 3.05  | 2.98  | 2.76   | 0.0103 | 0.0105 | 0.0109 | 4.78E-06 |
| 3.05  | 2.98  | 2.76   | 0.0103 | 0.0105 | 0.0109 | 4.78E-06 |
| 0.011 | 0.012 | 0.0117 | 3.58   | 3.23   | 3.38   | 4.80E-06 |
| 2.46  | 2.72  | 2.54   | 0.0103 | 0.0105 | 0.0109 | 4.83E-06 |
| 3.09  | 2.8   | 2.87   | 0.0103 | 0.0105 | 0.0109 | 4.85E-06 |
| 0.011 | 0.012 | 0.0117 | 2.78   | 2.75   | 3.02   | 4.90E-06 |
| 0.011 | 0.012 | 0.0117 | 2.25   | 2.48   | 2.45   | 5.03E-06 |
| 2.48  | 2.69  | 2.74   | 0.0103 | 0.0105 | 0.0109 | 5.05E-06 |
| 2.48  | 2.69  | 2.74   | 0.0103 | 0.0105 | 0.0109 | 5.05E-06 |
| 2.59  | 2.83  | 2.85   | 0.0103 | 0.0105 | 0.0109 | 5.11E-06 |
| 2.59  | 2.83  | 2.85   | 0.0103 | 0.0105 | 0.0109 | 5.11E-06 |
| 2.32  | 2.52  | 2.29   | 0.0103 | 0.0105 | 0.0109 | 5.17E-06 |
| 4.47  | 4.61  | 4.95   | 0.0103 | 0.0105 | 0.0109 | 5.19E-06 |
| 4.47  | 4.61  | 4.95   | 0.0103 | 0.0105 | 0.0109 | 5.19E-06 |
| 2.45  | 2.53  | 2.28   | 0.0103 | 0.0105 | 0.0109 | 5.22E-06 |
| 3.42  | 3.66  | 3.8    | 0.0103 | 0.0105 | 0.0109 | 5.29E-06 |
| 3.04  | 2.75  | 2.99   | 0.0103 | 0.0105 | 0.0109 | 5.29E-06 |
| 2.22  | 2.22  | 2.43   | 0.0103 | 0.0105 | 0.0109 | 5.30E-06 |
| 2.55  | 2.5   | 2.76   | 0.0103 | 0.0105 | 0.0109 | 5.31E-06 |
| 2.87  | 2.93  | 3.17   | 0.0103 | 0.0105 | 0.0109 | 5.34E-06 |
| 2.57  | 2.38  | 2.64   | 0.0103 | 0.0105 | 0.0109 | 5.39E-06 |
| 2.57  | 2.38  | 2.64   | 0.0103 | 0.0105 | 0.0109 | 5.39E-06 |
| 3.36  | 3.05  | 3.09   | 0.0103 | 0.0105 | 0.0109 | 5.40E-06 |
| 0.011 | 0.012 | 0.0117 | 3.67   | 3.46   | 3.3    | 5.45E-06 |
| 3.71  | 3.86  | 3.47   | 0.0103 | 0.0105 | 0.0109 | 5.47E-06 |
| 0.011 | 0.012 | 0.0117 | 2.83   | 3      | 3.15   | 5.51E-06 |
| 0.011 | 0.012 | 0.0117 | 2.83   | 3      | 3.15   | 5.51E-06 |
| 2.52  | 2.38  | 2.65   | 0.0103 | 0.0105 | 0.0109 | 5.58E-06 |
| 2.52  | 2.38  | 2.65   | 0.0103 | 0.0105 | 0.0109 | 5.58E-06 |
| 4.09  | 3.77  | 3.7    | 0.0103 | 0.0105 | 0.0109 | 5.68E-06 |
| 4.26  | 4.74  | 4.44   | 0.0103 | 0.0105 | 0.0109 | 5.74E-06 |
| 2.43  | 2.47  | 2.23   | 0.0103 | 0.0105 | 0.0109 | 5.78E-06 |
| 2.43  | 2.47  | 2.23   | 0.0103 | 0.0105 | 0.0109 | 5.78E-06 |
| 2.3   | 2.07  | 2.14   | 0.0103 | 0.0105 | 0.0109 | 5.88E-06 |
| 2.62  | 2.37  | 2.41   | 0.0103 | 0.0105 | 0.0109 | 5.92E-06 |
| 0.011 | 0.012 | 0.0117 | 2.43   | 2.71   | 2.59   | 5.96E-06 |
| 0.011 | 0.012 | 0.0117 | 2.66   | 2.55   | 2.84   | 5.97E-06 |
| 2.23  | 2.45  | 2.46   | 0.0103 | 0.0105 | 0.0109 | 6.00E-06 |
| 2.64  | 2.7   | 2.43   | 0.0103 | 0.0105 | 0.0109 | 6.04E-06 |
| 3.62  | 3.96  | 4.01   | 0.0103 | 0.0105 | 0.0109 | 6.09E-06 |
| 0.011 | 0.012 | 0.0117 | 2.67   | 2.72   | 2.45   | 6.15E-06 |
| 2.97  | 2.82  | 2.66   | 0.0103 | 0.0105 | 0.0109 | 6.17E-06 |
| 2.97  | 2.82  | 2.66   | 0.0103 | 0.0105 | 0.0109 | 6.17E-06 |
| 0.011 | 0.012 | 0.0117 | 2.8    | 2.7    | 2.51   | 6.24E-06 |
| 2.69  | 2.74  | 2.98   | 0.0103 | 0.0105 | 0.0109 | 6.29E-06 |
| 0.011 | 0.012 | 0.0117 | 2.82   | 3.1    | 2.82   | 6.38E-06 |
| 0.011 | 0.012 | 0.0117 | 2.82   | 3.1    | 2.82   | 6.38E-06 |
| 3.58  | 3.51  | 3.22   | 0.0103 | 0.0105 | 0.0109 | 6.38E-06 |
| 3.58  | 3.51  | 3.22   | 0.0103 | 0.0105 | 0.0109 | 6.38E-06 |
| 3.58  | 3.51  | 3.22   | 0.0103 | 0.0105 | 0.0109 | 6.38E-06 |
| 3.58  | 3.51  | 3.22   | 0.0103 | 0.0105 | 0.0109 | 6.38E-06 |
| 3.58  | 3.51  | 3.22   | 0.0103 | 0.0105 | 0.0109 | 6.38E-06 |
| 3.11  | 3.11  | 2.82   | 0.0103 | 0.0105 | 0.0109 | 6.40E-06 |
| 3.11  | 3.11  | 2.82   | 0.0103 | 0.0105 | 0.0109 | 6.40E-06 |
| 3.11  | 3.11  | 2.82   | 0.0103 | 0.0105 | 0.0109 | 6.40E-06 |
| 0.011 | 0.012 | 0.0117 | 2.48   | 2.53   | 2.75   | 6.41E-06 |
| 3.32  | 3.16  | 2.97   | 0.0103 | 0.0105 | 0.0109 | 6.42E-06 |
| 0.011 | 0.012 | 0.0117 | 3.98   | 4.09   | 3.67   | 6.43E-06 |



|       |       |        |        |        |        |          |
|-------|-------|--------|--------|--------|--------|----------|
| 0.011 | 0.012 | 0.0117 | 2.73   | 2.74   | 2.48   | 6.43E-06 |
| 3.42  | 3.08  | 3.15   | 0.0103 | 0.0105 | 0.0109 | 6.51E-06 |
| 2.41  | 2.18  | 2.4    | 0.0103 | 0.0105 | 0.0109 | 6.53E-06 |
| 2.41  | 2.18  | 2.4    | 0.0103 | 0.0105 | 0.0109 | 6.53E-06 |
| 0.011 | 0.012 | 0.0117 | 3.07   | 3.14   | 2.82   | 6.56E-06 |
| 0.011 | 0.012 | 0.0117 | 3.07   | 3.14   | 2.82   | 6.56E-06 |
| 2.92  | 2.88  | 2.63   | 0.0103 | 0.0105 | 0.0109 | 6.58E-06 |
| 2.36  | 2.31  | 2.12   | 0.0103 | 0.0105 | 0.0109 | 6.61E-06 |
| 2.86  | 3.11  | 2.8    | 0.0103 | 0.0105 | 0.0109 | 6.72E-06 |
| 2.86  | 3.11  | 2.8    | 0.0103 | 0.0105 | 0.0109 | 6.72E-06 |
| 3.99  | 3.96  | 3.6    | 0.0103 | 0.0105 | 0.0109 | 6.76E-06 |
| 2.92  | 3.25  | 3.19   | 0.0103 | 0.0105 | 0.0109 | 6.76E-06 |
| 2.92  | 3.25  | 3.19   | 0.0103 | 0.0105 | 0.0109 | 6.76E-06 |
| 2.69  | 2.9   | 2.6    | 0.0103 | 0.0105 | 0.0109 | 6.80E-06 |
| 2.69  | 2.9   | 2.6    | 0.0103 | 0.0105 | 0.0109 | 6.80E-06 |
| 3.32  | 3.64  | 3.69   | 0.0103 | 0.0105 | 0.0109 | 6.85E-06 |
| 2.78  | 2.74  | 2.5    | 0.0103 | 0.0105 | 0.0109 | 6.92E-06 |
| 2.78  | 2.74  | 2.5    | 0.0103 | 0.0105 | 0.0109 | 6.92E-06 |
| 2.51  | 2.45  | 2.25   | 0.0103 | 0.0105 | 0.0109 | 6.94E-06 |
| 2.55  | 2.31  | 2.32   | 0.0103 | 0.0105 | 0.0109 | 6.98E-06 |
| 2.48  | 2.22  | 2.41   | 0.0103 | 0.0105 | 0.0109 | 7.00E-06 |
| 2.25  | 2.01  | 2.11   | 0.0103 | 0.0105 | 0.0109 | 7.02E-06 |
| 2.47  | 2.37  | 2.65   | 0.0103 | 0.0105 | 0.0109 | 7.02E-06 |
| 3.01  | 2.76  | 2.71   | 0.0103 | 0.0105 | 0.0109 | 7.02E-06 |
| 3.01  | 2.76  | 2.71   | 0.0103 | 0.0105 | 0.0109 | 7.02E-06 |
| 3.16  | 2.82  | 2.98   | 0.0103 | 0.0105 | 0.0109 | 7.06E-06 |
| 0.011 | 0.012 | 0.0117 | 3.6    | 4.03   | 3.77   | 7.07E-06 |
| 2.42  | 2.7   | 2.64   | 0.0103 | 0.0105 | 0.0109 | 7.10E-06 |
| 2.42  | 2.7   | 2.64   | 0.0103 | 0.0105 | 0.0109 | 7.10E-06 |
| 2.8   | 2.74  | 2.51   | 0.0103 | 0.0105 | 0.0109 | 7.12E-06 |
| 2.8   | 2.74  | 2.51   | 0.0103 | 0.0105 | 0.0109 | 7.12E-06 |
| 4.82  | 4.32  | 4.72   | 0.0103 | 0.0105 | 0.0109 | 7.18E-06 |
| 4.82  | 4.32  | 4.72   | 0.0103 | 0.0105 | 0.0109 | 7.18E-06 |
| 2.76  | 2.79  | 2.51   | 0.0103 | 0.0105 | 0.0109 | 7.21E-06 |
| 2.76  | 2.79  | 2.51   | 0.0103 | 0.0105 | 0.0109 | 7.21E-06 |
| 2.55  | 2.8   | 2.53   | 0.0103 | 0.0105 | 0.0109 | 7.24E-06 |
| 3.27  | 3.3   | 2.97   | 0.0103 | 0.0105 | 0.0109 | 7.27E-06 |
| 3.27  | 3.3   | 2.97   | 0.0103 | 0.0105 | 0.0109 | 7.27E-06 |
| 0.011 | 0.012 | 0.0117 | 3.47   | 3.36   | 3.1    | 7.29E-06 |
| 3.05  | 2.73  | 2.98   | 0.0103 | 0.0105 | 0.0109 | 7.40E-06 |
| 3.05  | 2.73  | 2.98   | 0.0103 | 0.0105 | 0.0109 | 7.40E-06 |
| 2.23  | 2.5   | 2.34   | 0.0103 | 0.0105 | 0.0109 | 7.42E-06 |
| 2.23  | 2.5   | 2.34   | 0.0103 | 0.0105 | 0.0109 | 7.42E-06 |
| 2.39  | 2.67  | 2.61   | 0.0103 | 0.0105 | 0.0109 | 7.44E-06 |
| 2.39  | 2.67  | 2.61   | 0.0103 | 0.0105 | 0.0109 | 7.44E-06 |
| 0.011 | 0.012 | 0.0117 | 2.24   | 2.48   | 2.48   | 7.50E-06 |
| 0.011 | 0.012 | 0.0117 | 2.65   | 2.62   | 2.38   | 7.64E-06 |
| 3.54  | 3.32  | 3.73   | 0.0103 | 0.0105 | 0.0109 | 7.64E-06 |
| 3.62  | 4.06  | 3.78   | 0.0103 | 0.0105 | 0.0109 | 7.73E-06 |
| 2.36  | 2.41  | 2.63   | 0.0103 | 0.0105 | 0.0109 | 7.74E-06 |
| 2.36  | 2.41  | 2.63   | 0.0103 | 0.0105 | 0.0109 | 7.74E-06 |
| 2.42  | 2.61  | 2.33   | 0.0103 | 0.0105 | 0.0109 | 7.76E-06 |
| 2.99  | 3.18  | 2.83   | 0.0103 | 0.0105 | 0.0109 | 7.81E-06 |
| 2.99  | 3.18  | 2.83   | 0.0103 | 0.0105 | 0.0109 | 7.81E-06 |
| 2.9   | 2.62  | 2.63   | 0.0103 | 0.0105 | 0.0109 | 7.86E-06 |
| 0.011 | 0.012 | 0.0117 | 3.36   | 3.15   | 2.99   | 7.92E-06 |
| 2.52  | 2.8   | 2.55   | 0.0103 | 0.0105 | 0.0109 | 7.93E-06 |
| 2.52  | 2.8   | 2.55   | 0.0103 | 0.0105 | 0.0109 | 7.93E-06 |

|       |       |        |        |        |        |          |
|-------|-------|--------|--------|--------|--------|----------|
| 0.011 | 0.012 | 0.0117 | 2.39   | 2.68   | 2.6    | 7.94E-06 |
| 3.99  | 3.55  | 3.83   | 0.0103 | 0.0105 | 0.0109 | 7.98E-06 |
| 0.011 | 0.012 | 0.0117 | 2.55   | 2.42   | 2.72   | 7.99E-06 |
| 3.77  | 4.22  | 4.13   | 0.0103 | 0.0105 | 0.0109 | 8.07E-06 |
| 3.77  | 4.22  | 4.13   | 0.0103 | 0.0105 | 0.0109 | 8.07E-06 |
| 3.77  | 4.22  | 4.13   | 0.0103 | 0.0105 | 0.0109 | 8.07E-06 |
| 0.011 | 0.012 | 0.0117 | 3.24   | 2.88   | 3.05   | 8.09E-06 |
| 0.011 | 0.012 | 0.0117 | 2.89   | 2.57   | 2.71   | 8.10E-06 |
| 2.08  | 2.23  | 2.34   | 0.0103 | 0.0105 | 0.0109 | 8.10E-06 |
| 3.03  | 2.94  | 2.7    | 0.0103 | 0.0105 | 0.0109 | 8.15E-06 |
| 3.03  | 2.94  | 2.7    | 0.0103 | 0.0105 | 0.0109 | 8.15E-06 |
| 2.53  | 2.4   | 2.7    | 0.0103 | 0.0105 | 0.0109 | 8.23E-06 |
| 2.53  | 2.4   | 2.7    | 0.0103 | 0.0105 | 0.0109 | 8.23E-06 |
| 3.01  | 2.72  | 3.03   | 0.0103 | 0.0105 | 0.0109 | 8.36E-06 |
| 3.01  | 2.72  | 3.03   | 0.0103 | 0.0105 | 0.0109 | 8.36E-06 |
| 2.36  | 2.26  | 2.54   | 0.0103 | 0.0105 | 0.0109 | 8.41E-06 |
| 2.36  | 2.26  | 2.54   | 0.0103 | 0.0105 | 0.0109 | 8.41E-06 |
| 2.29  | 2.58  | 2.44   | 0.0103 | 0.0105 | 0.0109 | 8.45E-06 |
| 2.29  | 2.58  | 2.44   | 0.0103 | 0.0105 | 0.0109 | 8.45E-06 |
| 0.011 | 0.012 | 0.0117 | 2.68   | 2.86   | 2.54   | 8.47E-06 |
| 0.011 | 0.012 | 0.0117 | 2.68   | 2.86   | 2.54   | 8.47E-06 |
| 2.76  | 2.59  | 2.92   | 0.0103 | 0.0105 | 0.0109 | 8.63E-06 |
| 2.76  | 2.59  | 2.92   | 0.0103 | 0.0105 | 0.0109 | 8.63E-06 |
| 2.63  | 2.38  | 2.37   | 0.0103 | 0.0105 | 0.0109 | 8.65E-06 |
| 0.011 | 0.012 | 0.0117 | 2.88   | 3.23   | 3.16   | 8.66E-06 |
| 3.67  | 3.27  | 3.38   | 0.0103 | 0.0105 | 0.0109 | 8.72E-06 |
| 2.29  | 2.57  | 2.51   | 0.0103 | 0.0105 | 0.0109 | 8.73E-06 |
| 2.29  | 2.57  | 2.51   | 0.0103 | 0.0105 | 0.0109 | 8.73E-06 |
| 0.011 | 0.012 | 0.0117 | 3.48   | 3.13   | 3.48   | 8.74E-06 |
| 0.011 | 0.012 | 0.0117 | 3.48   | 3.13   | 3.48   | 8.74E-06 |
| 3.2   | 2.84  | 2.99   | 0.0103 | 0.0105 | 0.0109 | 8.74E-06 |
| 2.8   | 2.78  | 2.51   | 0.0103 | 0.0105 | 0.0109 | 8.74E-06 |
| 0.011 | 0.012 | 0.0117 | 2.63   | 2.37   | 2.64   | 8.79E-06 |
| 3.55  | 4     | 3.73   | 0.0103 | 0.0105 | 0.0109 | 8.81E-06 |
| 0.011 | 0.012 | 0.0117 | 2.66   | 2.82   | 2.5    | 8.81E-06 |
| 2.63  | 2.92  | 2.93   | 0.0103 | 0.0105 | 0.0109 | 8.86E-06 |
| 2.63  | 2.92  | 2.93   | 0.0103 | 0.0105 | 0.0109 | 8.86E-06 |
| 3.22  | 2.86  | 2.99   | 0.0103 | 0.0105 | 0.0109 | 8.86E-06 |
| 3.68  | 3.27  | 3.41   | 0.0103 | 0.0105 | 0.0109 | 8.88E-06 |
| 2.77  | 3.09  | 2.81   | 0.0103 | 0.0105 | 0.0109 | 8.89E-06 |
| 3.97  | 3.62  | 3.55   | 0.0103 | 0.0105 | 0.0109 | 9.02E-06 |
| 2.57  | 2.29  | 2.36   | 0.0103 | 0.0105 | 0.0109 | 9.04E-06 |
| 3.07  | 2.95  | 3.32   | 0.0103 | 0.0105 | 0.0109 | 9.06E-06 |
| 2.78  | 3.06  | 3.12   | 0.0103 | 0.0105 | 0.0109 | 9.14E-06 |
| 0.011 | 0.012 | 0.0117 | 3.01   | 2.79   | 3.15   | 9.19E-06 |
| 2.14  | 2.39  | 2.17   | 0.0103 | 0.0105 | 0.0109 | 9.40E-06 |
| 0.011 | 0.012 | 0.0117 | 2.46   | 2.2    | 2.44   | 9.42E-06 |
| 0.011 | 0.012 | 0.0117 | 2.46   | 2.2    | 2.44   | 9.42E-06 |
| 2.2   | 2.18  | 2.43   | 0.0103 | 0.0105 | 0.0109 | 9.45E-06 |
| 2.72  | 2.86  | 2.53   | 0.0103 | 0.0105 | 0.0109 | 9.46E-06 |
| 2.21  | 2.44  | 2.48   | 0.0103 | 0.0105 | 0.0109 | 9.51E-06 |
| 3.14  | 2.85  | 2.81   | 0.0103 | 0.0105 | 0.0109 | 9.53E-06 |
| 0.011 | 0.012 | 0.0117 | 2.64   | 2.92   | 2.96   | 9.55E-06 |
| 0.011 | 0.012 | 0.0117 | 3.37   | 3.03   | 3.04   | 9.59E-06 |
| 2.3   | 2.04  | 2.23   | 0.0103 | 0.0105 | 0.0109 | 9.60E-06 |
| 2.3   | 2.04  | 2.23   | 0.0103 | 0.0105 | 0.0109 | 9.60E-06 |
| 2.54  | 2.49  | 2.79   | 0.0103 | 0.0105 | 0.0109 | 9.71E-06 |
| 2.54  | 2.49  | 2.79   | 0.0103 | 0.0105 | 0.0109 | 9.71E-06 |

|       |       |        |        |        |        |          |
|-------|-------|--------|--------|--------|--------|----------|
| 2.57  | 2.28  | 2.37   | 0.0103 | 0.0105 | 0.0109 | 9.74E-06 |
| 2.57  | 2.28  | 2.37   | 0.0103 | 0.0105 | 0.0109 | 9.74E-06 |
| 2.37  | 2.33  | 2.11   | 0.0103 | 0.0105 | 0.0109 | 9.74E-06 |
| 2.37  | 2.33  | 2.11   | 0.0103 | 0.0105 | 0.0109 | 9.74E-06 |
| 3.47  | 3.17  | 3.09   | 0.0103 | 0.0105 | 0.0109 | 9.75E-06 |
| 3.47  | 3.17  | 3.09   | 0.0103 | 0.0105 | 0.0109 | 9.75E-06 |
| 0.011 | 0.012 | 0.0117 | 2.76   | 2.45   | 2.54   | 9.77E-06 |
| 2.4   | 2.62  | 2.33   | 0.0103 | 0.0105 | 0.0109 | 9.79E-06 |
| 2.74  | 2.57  | 2.91   | 0.0103 | 0.0105 | 0.0109 | 9.95E-06 |
| 2.74  | 2.57  | 2.91   | 0.0103 | 0.0105 | 0.0109 | 9.95E-06 |
| 2.77  | 3.12  | 3.05   | 0.0103 | 0.0105 | 0.0109 | 1.00E-05 |
| 3.14  | 2.78  | 3.04   | 0.0103 | 0.0105 | 0.0109 | 1.00E-05 |
| 2.55  | 2.48  | 2.79   | 0.0103 | 0.0105 | 0.0109 | 1.02E-05 |
| 2.55  | 2.48  | 2.79   | 0.0103 | 0.0105 | 0.0109 | 1.02E-05 |
| 4     | 4.23  | 4.53   | 0.0103 | 0.0105 | 0.0109 | 1.02E-05 |
| 3.21  | 2.97  | 2.84   | 0.0103 | 0.0105 | 0.0109 | 1.02E-05 |
| 3.21  | 2.97  | 2.84   | 0.0103 | 0.0105 | 0.0109 | 1.02E-05 |
| 3.21  | 2.97  | 2.84   | 0.0103 | 0.0105 | 0.0109 | 1.02E-05 |
| 2.45  | 2.19  | 2.44   | 0.0103 | 0.0105 | 0.0109 | 1.02E-05 |
| 2.45  | 2.19  | 2.44   | 0.0103 | 0.0105 | 0.0109 | 1.02E-05 |
| 3.15  | 2.79  | 2.9    | 0.0103 | 0.0105 | 0.0109 | 1.03E-05 |
| 2.94  | 3.33  | 3.1    | 0.0103 | 0.0105 | 0.0109 | 1.04E-05 |
| 2.94  | 3.33  | 3.1    | 0.0103 | 0.0105 | 0.0109 | 1.04E-05 |
| 4.33  | 4.33  | 4.82   | 0.0103 | 0.0105 | 0.0109 | 1.05E-05 |
| 2.78  | 2.81  | 3.11   | 0.0103 | 0.0105 | 0.0109 | 1.05E-05 |
| 2.78  | 2.45  | 2.63   | 0.0103 | 0.0105 | 0.0109 | 1.06E-05 |
| 0.011 | 0.012 | 0.0117 | 2.45   | 2.78   | 2.63   | 1.06E-05 |
| 0.011 | 0.012 | 0.0117 | 2.45   | 2.78   | 2.63   | 1.06E-05 |
| 3.21  | 2.92  | 3.3    | 0.0103 | 0.0105 | 0.0109 | 1.07E-05 |
| 3.7   | 3.96  | 4.2    | 0.0103 | 0.0105 | 0.0109 | 1.07E-05 |
| 3.7   | 3.96  | 4.2    | 0.0103 | 0.0105 | 0.0109 | 1.07E-05 |
| 0.011 | 0.012 | 0.0117 | 2.43   | 2.66   | 2.75   | 1.07E-05 |
| 2.39  | 2.48  | 2.7    | 0.0103 | 0.0105 | 0.0109 | 1.07E-05 |
| 2.45  | 2.69  | 2.39   | 0.0103 | 0.0105 | 0.0109 | 1.08E-05 |
| 2.57  | 2.55  | 2.29   | 0.0103 | 0.0105 | 0.0109 | 1.08E-05 |
| 2.57  | 2.55  | 2.29   | 0.0103 | 0.0105 | 0.0109 | 1.08E-05 |
| 3.62  | 4.11  | 3.9    | 0.0103 | 0.0105 | 0.0109 | 1.08E-05 |
| 3.62  | 4.11  | 3.9    | 0.0103 | 0.0105 | 0.0109 | 1.08E-05 |
| 3.24  | 3.62  | 3.26   | 0.0103 | 0.0105 | 0.0109 | 1.08E-05 |
| 3.24  | 3.62  | 3.26   | 0.0103 | 0.0105 | 0.0109 | 1.08E-05 |
| 3.24  | 3.63  | 3.28   | 0.0103 | 0.0105 | 0.0109 | 1.08E-05 |
| 2.36  | 2.67  | 2.59   | 0.0103 | 0.0105 | 0.0109 | 1.08E-05 |
| 2.44  | 2.61  | 2.3    | 0.0103 | 0.0105 | 0.0109 | 1.08E-05 |
| 3.35  | 2.95  | 3.17   | 0.0103 | 0.0105 | 0.0109 | 1.09E-05 |
| 2.1   | 2.32  | 2.37   | 0.0103 | 0.0105 | 0.0109 | 1.09E-05 |
| 0.011 | 0.012 | 0.0117 | 2.73   | 2.42   | 2.49   | 1.12E-05 |
| 0.011 | 0.012 | 0.0117 | 2.96   | 3.35   | 3.26   | 1.13E-05 |
| 2.6   | 2.31  | 2.36   | 0.0103 | 0.0105 | 0.0109 | 1.13E-05 |
| 0.011 | 0.012 | 0.0117 | 2.9    | 2.56   | 2.67   | 1.13E-05 |
| 2.39  | 2.38  | 2.66   | 0.0103 | 0.0105 | 0.0109 | 1.14E-05 |
| 2.8   | 2.47  | 2.58   | 0.0103 | 0.0105 | 0.0109 | 1.14E-05 |
| 2.8   | 2.47  | 2.58   | 0.0103 | 0.0105 | 0.0109 | 1.14E-05 |
| 2.96  | 2.61  | 2.73   | 0.0103 | 0.0105 | 0.0109 | 1.15E-05 |
| 3.4   | 3.34  | 3.01   | 0.0103 | 0.0105 | 0.0109 | 1.17E-05 |
| 3.36  | 3.01  | 3.01   | 0.0103 | 0.0105 | 0.0109 | 1.17E-05 |
| 3.36  | 3.01  | 3.01   | 0.0103 | 0.0105 | 0.0109 | 1.17E-05 |
| 4.64  | 4.09  | 4.27   | 0.0103 | 0.0105 | 0.0109 | 1.17E-05 |
| 3.22  | 2.9   | 2.87   | 0.0103 | 0.0105 | 0.0109 | 1.18E-05 |

|       |       |        |        |        |        |          |
|-------|-------|--------|--------|--------|--------|----------|
| 3.22  | 2.9   | 2.87   | 0.0103 | 0.0105 | 0.0109 | 1.18E-05 |
| 3.05  | 3.21  | 2.82   | 0.0103 | 0.0105 | 0.0109 | 1.18E-05 |
| 2.73  | 2.78  | 2.46   | 0.0103 | 0.0105 | 0.0109 | 1.18E-05 |
| 3.54  | 3.91  | 3.47   | 0.0103 | 0.0105 | 0.0109 | 1.19E-05 |
| 3.55  | 3.16  | 3.2    | 0.0103 | 0.0105 | 0.0109 | 1.19E-05 |
| 3.55  | 3.16  | 3.2    | 0.0103 | 0.0105 | 0.0109 | 1.19E-05 |
| 2.62  | 2.84  | 2.5    | 0.0103 | 0.0105 | 0.0109 | 1.20E-05 |
| 2.5   | 2.41  | 2.2    | 0.0103 | 0.0105 | 0.0109 | 1.20E-05 |
| 0.011 | 0.012 | 0.0117 | 2.66   | 3.02   | 2.78   | 1.20E-05 |
| 2.39  | 2.22  | 2.1    | 0.0103 | 0.0105 | 0.0109 | 1.21E-05 |
| 2.24  | 2.15  | 2.44   | 0.0103 | 0.0105 | 0.0109 | 1.22E-05 |
| 2.47  | 2.79  | 2.75   | 0.0103 | 0.0105 | 0.0109 | 1.22E-05 |
| 2.47  | 2.79  | 2.75   | 0.0103 | 0.0105 | 0.0109 | 1.22E-05 |
| 2.47  | 2.79  | 2.75   | 0.0103 | 0.0105 | 0.0109 | 1.22E-05 |
| 0.011 | 0.012 | 0.0117 | 3.22   | 3.54   | 3.13   | 1.22E-05 |
| 0.011 | 0.012 | 0.0117 | 3.11   | 2.76   | 2.81   | 1.23E-05 |
| 0.011 | 0.012 | 0.0117 | 3.11   | 2.76   | 2.81   | 1.23E-05 |
| 2.82  | 3.19  | 2.9    | 0.0103 | 0.0105 | 0.0109 | 1.24E-05 |
| 2.65  | 3.02  | 2.88   | 0.0103 | 0.0105 | 0.0109 | 1.24E-05 |
| 3.32  | 3.21  | 2.92   | 0.0103 | 0.0105 | 0.0109 | 1.24E-05 |
| 3.32  | 3.21  | 2.92   | 0.0103 | 0.0105 | 0.0109 | 1.24E-05 |
| 0.011 | 0.012 | 0.0117 | 3.52   | 3.59   | 3.17   | 1.24E-05 |
| 0.011 | 0.012 | 0.0117 | 3.22   | 3.2    | 3.59   | 1.26E-05 |
| 2.93  | 2.85  | 2.58   | 0.0103 | 0.0105 | 0.0109 | 1.26E-05 |
| 2.67  | 2.77  | 3.03   | 0.0103 | 0.0105 | 0.0109 | 1.26E-05 |
| 2.67  | 2.77  | 3.03   | 0.0103 | 0.0105 | 0.0109 | 1.26E-05 |
| 2.15  | 2.42  | 2.18   | 0.0103 | 0.0105 | 0.0109 | 1.26E-05 |
| 2.15  | 2.42  | 2.18   | 0.0103 | 0.0105 | 0.0109 | 1.26E-05 |
| 4.27  | 4.83  | 4.38   | 0.0103 | 0.0105 | 0.0109 | 1.27E-05 |
| 2.74  | 2.43  | 2.72   | 0.0103 | 0.0105 | 0.0109 | 1.27E-05 |
| 0.011 | 0.012 | 0.0117 | 2.19   | 2.19   | 2.45   | 1.27E-05 |
| 0.011 | 0.012 | 0.0117 | 2.04   | 2.31   | 2.1    | 1.28E-05 |
| 0.011 | 0.012 | 0.0117 | 2.04   | 2.31   | 2.1    | 1.28E-05 |
| 3.35  | 3.04  | 2.96   | 0.0103 | 0.0105 | 0.0109 | 1.28E-05 |
| 0.011 | 0.012 | 0.0117 | 2.56   | 2.79   | 2.92   | 1.28E-05 |
| 0.011 | 0.012 | 0.0117 | 2.56   | 2.79   | 2.92   | 1.28E-05 |
| 0.011 | 0.012 | 0.0117 | 2.47   | 2.81   | 2.58   | 1.29E-05 |
| 0.011 | 0.012 | 0.0117 | 2.47   | 2.81   | 2.58   | 1.29E-05 |
| 0.011 | 0.012 | 0.0117 | 3.1    | 3.44   | 3.05   | 1.30E-05 |
| 0.011 | 0.012 | 0.0117 | 3.1    | 3.44   | 3.05   | 1.30E-05 |
| 2.41  | 2.27  | 2.11   | 0.0103 | 0.0105 | 0.0109 | 1.30E-05 |
| 2.41  | 2.27  | 2.11   | 0.0103 | 0.0105 | 0.0109 | 1.30E-05 |
| 0.011 | 0.012 | 0.0117 | 3      | 2.63   | 2.88   | 1.32E-05 |
| 2.24  | 2.41  | 2.11   | 0.0103 | 0.0105 | 0.0109 | 1.34E-05 |
| 4.19  | 3.68  | 4.07   | 0.0103 | 0.0105 | 0.0109 | 1.34E-05 |
| 0.011 | 0.012 | 0.0117 | 3.66   | 4.03   | 3.55   | 1.36E-05 |
| 0.011 | 0.012 | 0.0117 | 3.66   | 4.03   | 3.55   | 1.36E-05 |
| 4.05  | 4     | 4.06   | 2.39   | 2.21   | 2.41   | 1.37E-05 |
| 3.16  | 3.29  | 2.88   | 0.0103 | 0.0105 | 0.0109 | 1.38E-05 |
| 2.22  | 2.54  | 2.37   | 0.0103 | 0.0105 | 0.0109 | 1.38E-05 |
| 2.22  | 2.54  | 2.37   | 0.0103 | 0.0105 | 0.0109 | 1.38E-05 |
| 2.1   | 2.39  | 2.18   | 0.0103 | 0.0105 | 0.0109 | 1.39E-05 |
| 2.1   | 2.39  | 2.18   | 0.0103 | 0.0105 | 0.0109 | 1.39E-05 |
| 0.011 | 0.012 | 0.0117 | 2.8    | 2.59   | 2.45   | 1.39E-05 |
| 2.96  | 3.15  | 2.75   | 0.0103 | 0.0105 | 0.0109 | 1.41E-05 |
| 2.96  | 3.15  | 2.75   | 0.0103 | 0.0105 | 0.0109 | 1.41E-05 |
| 3.09  | 2.8   | 2.72   | 0.0103 | 0.0105 | 0.0109 | 1.42E-05 |
| 3.09  | 2.8   | 2.72   | 0.0103 | 0.0105 | 0.0109 | 1.42E-05 |

|       |       |        |        |        |        |          |
|-------|-------|--------|--------|--------|--------|----------|
| 2.77  | 2.43  | 2.53   | 0.0103 | 0.0105 | 0.0109 | 1.42E-05 |
| 0.011 | 0.012 | 0.0117 | 2.5    | 2.8    | 2.49   | 1.42E-05 |
| 0.011 | 0.012 | 0.0117 | 2.5    | 2.86   | 2.74   | 1.43E-05 |
| 2.79  | 2.77  | 3.12   | 0.0103 | 0.0105 | 0.0109 | 1.43E-05 |
| 2.4   | 2.11  | 2.18   | 0.0103 | 0.0105 | 0.0109 | 1.43E-05 |
| 2.4   | 2.11  | 2.18   | 0.0103 | 0.0105 | 0.0109 | 1.43E-05 |
| 2.44  | 2.78  | 2.71   | 0.0103 | 0.0105 | 0.0109 | 1.43E-05 |
| 3.02  | 2.69  | 2.69   | 0.0103 | 0.0105 | 0.0109 | 1.44E-05 |
| 2.37  | 2.08  | 2.16   | 0.0103 | 0.0105 | 0.0109 | 1.44E-05 |
| 2.37  | 2.08  | 2.16   | 0.0103 | 0.0105 | 0.0109 | 1.44E-05 |
| 0.011 | 0.012 | 0.0117 | 2.59   | 2.26   | 2.44   | 1.44E-05 |
| 2.33  | 2.41  | 2.11   | 0.0103 | 0.0105 | 0.0109 | 1.44E-05 |
| 2.33  | 2.41  | 2.11   | 0.0103 | 0.0105 | 0.0109 | 1.44E-05 |
| 2.85  | 2.49  | 2.73   | 0.0103 | 0.0105 | 0.0109 | 1.45E-05 |
| 0.011 | 0.012 | 0.0117 | 2.67   | 3.05   | 2.95   | 1.45E-05 |
| 2.97  | 2.64  | 2.65   | 0.0103 | 0.0105 | 0.0109 | 1.45E-05 |
| 2.54  | 2.24  | 2.29   | 0.0103 | 0.0105 | 0.0109 | 1.45E-05 |
| 2.54  | 2.24  | 2.29   | 0.0103 | 0.0105 | 0.0109 | 1.45E-05 |
| 2.68  | 2.56  | 2.34   | 0.0103 | 0.0105 | 0.0109 | 1.46E-05 |
| 2     | 2.19  | 2.29   | 0.0103 | 0.0105 | 0.0109 | 1.46E-05 |
| 2     | 2.19  | 2.29   | 0.0103 | 0.0105 | 0.0109 | 1.46E-05 |
| 2.5   | 2.84  | 2.8    | 0.0103 | 0.0105 | 0.0109 | 1.47E-05 |
| 2.5   | 2.84  | 2.8    | 0.0103 | 0.0105 | 0.0109 | 1.47E-05 |
| 2.5   | 2.84  | 2.8    | 0.0103 | 0.0105 | 0.0109 | 1.47E-05 |
| 2.5   | 2.84  | 2.8    | 0.0103 | 0.0105 | 0.0109 | 1.47E-05 |
| 2.71  | 2.45  | 2.8    | 0.0103 | 0.0105 | 0.0109 | 1.48E-05 |
| 2.71  | 2.45  | 2.8    | 0.0103 | 0.0105 | 0.0109 | 1.48E-05 |
| 2.71  | 2.45  | 2.8    | 0.0103 | 0.0105 | 0.0109 | 1.48E-05 |
| 4.29  | 3.76  | 4.18   | 0.0103 | 0.0105 | 0.0109 | 1.48E-05 |
| 0.011 | 0.012 | 0.0117 | 2.73   | 2.58   | 2.38   | 1.48E-05 |
| 0.011 | 0.012 | 0.0117 | 3.36   | 3.69   | 3.85   | 1.49E-05 |
| 2.77  | 3.17  | 3.06   | 0.0103 | 0.0105 | 0.0109 | 1.51E-05 |
| 2.77  | 3.17  | 3.06   | 0.0103 | 0.0105 | 0.0109 | 1.51E-05 |
| 0.011 | 0.012 | 0.0117 | 3.15   | 3.58   | 3.23   | 1.51E-05 |
| 2.51  | 2.78  | 2.87   | 0.0103 | 0.0105 | 0.0109 | 1.51E-05 |
| 0.011 | 0.012 | 0.0117 | 3.26   | 2.89   | 2.91   | 1.51E-05 |
| 0.011 | 0.012 | 0.0117 | 2.61   | 2.62   | 2.94   | 1.51E-05 |
| 2.75  | 3.13  | 2.83   | 0.0103 | 0.0105 | 0.0109 | 1.52E-05 |
| 0.011 | 0.012 | 0.0117 | 3.4    | 3.05   | 3.48   | 1.52E-05 |
| 3.97  | 3.52  | 3.54   | 0.0103 | 0.0105 | 0.0109 | 1.53E-05 |
| 3.7   | 4.24  | 3.9    | 0.0103 | 0.0105 | 0.0109 | 1.53E-05 |
| 3.7   | 4.24  | 3.9    | 0.0103 | 0.0105 | 0.0109 | 1.53E-05 |
| 2.9   | 2.56  | 2.6    | 0.0103 | 0.0105 | 0.0109 | 1.53E-05 |
| 0.011 | 0.012 | 0.0117 | 2.94   | 3.1    | 3.37   | 1.54E-05 |
| 2.66  | 2.45  | 2.32   | 0.0103 | 0.0105 | 0.0109 | 1.54E-05 |
| 2.66  | 2.45  | 2.32   | 0.0103 | 0.0105 | 0.0109 | 1.54E-05 |
| 5.5   | 5.09  | 4.79   | 0.0103 | 0.0105 | 0.0109 | 1.55E-05 |
| 3.04  | 3.48  | 3.18   | 0.0103 | 0.0105 | 0.0109 | 1.56E-05 |
| 3.04  | 3.48  | 3.18   | 0.0103 | 0.0105 | 0.0109 | 1.56E-05 |
| 3.51  | 3.31  | 3.8    | 0.0103 | 0.0105 | 0.0109 | 1.57E-05 |
| 3.51  | 3.31  | 3.8    | 0.0103 | 0.0105 | 0.0109 | 1.57E-05 |
| 3.51  | 3.31  | 3.8    | 0.0103 | 0.0105 | 0.0109 | 1.57E-05 |
| 2.96  | 3.37  | 3.04   | 0.0103 | 0.0105 | 0.0109 | 1.57E-05 |
| 3.12  | 2.72  | 3      | 0.0103 | 0.0105 | 0.0109 | 1.58E-05 |
| 2.65  | 2.42  | 2.78   | 0.0103 | 0.0105 | 0.0109 | 1.58E-05 |
| 2.65  | 2.42  | 2.78   | 0.0103 | 0.0105 | 0.0109 | 1.58E-05 |
| 2.73  | 3.14  | 2.94   | 0.0103 | 0.0105 | 0.0109 | 1.59E-05 |
| 2.73  | 3.14  | 2.94   | 0.0103 | 0.0105 | 0.0109 | 1.59E-05 |

|       |       |        |        |        |        |          |
|-------|-------|--------|--------|--------|--------|----------|
| 2     | 2.3   | 2.18   | 0.0103 | 0.0105 | 0.0109 | 1.61E-05 |
| 2     | 2.3   | 2.18   | 0.0103 | 0.0105 | 0.0109 | 1.61E-05 |
| 2.29  | 2.33  | 2.6    | 0.0103 | 0.0105 | 0.0109 | 1.62E-05 |
| 2.29  | 2.33  | 2.6    | 0.0103 | 0.0105 | 0.0109 | 1.62E-05 |
| 3.56  | 3.89  | 3.39   | 0.0103 | 0.0105 | 0.0109 | 1.63E-05 |
| 3.56  | 3.89  | 3.39   | 0.0103 | 0.0105 | 0.0109 | 1.63E-05 |
| 2.68  | 2.36  | 2.4    | 0.0103 | 0.0105 | 0.0109 | 1.64E-05 |
| 2.97  | 3.42  | 3.22   | 0.0103 | 0.0105 | 0.0109 | 1.64E-05 |
| 0.011 | 0.012 | 0.0117 | 2.65   | 3.04   | 2.78   | 1.64E-05 |
| 2.86  | 3.04  | 2.64   | 0.0103 | 0.0105 | 0.0109 | 1.64E-05 |
| 3.91  | 3.54  | 3.42   | 0.0103 | 0.0105 | 0.0109 | 1.65E-05 |
| 3.91  | 3.54  | 3.42   | 0.0103 | 0.0105 | 0.0109 | 1.65E-05 |
| 0.011 | 0.012 | 0.0117 | 2.52   | 2.69   | 2.9    | 1.65E-05 |
| 0.011 | 0.012 | 0.0117 | 2.52   | 2.69   | 2.9    | 1.65E-05 |
| 2.58  | 2.97  | 2.76   | 0.0103 | 0.0105 | 0.0109 | 1.65E-05 |
| 2.58  | 2.97  | 2.76   | 0.0103 | 0.0105 | 0.0109 | 1.65E-05 |
| 2.84  | 3.24  | 3.19   | 0.0103 | 0.0105 | 0.0109 | 1.65E-05 |
| 2.84  | 3.24  | 3.19   | 0.0103 | 0.0105 | 0.0109 | 1.65E-05 |
| 3.06  | 2.68  | 2.76   | 0.0103 | 0.0105 | 0.0109 | 1.67E-05 |
| 3.06  | 2.68  | 2.76   | 0.0103 | 0.0105 | 0.0109 | 1.67E-05 |
| 0.011 | 0.012 | 0.0117 | 2.5    | 2.59   | 2.86   | 1.68E-05 |
| 2.29  | 2.64  | 2.46   | 0.0103 | 0.0105 | 0.0109 | 1.71E-05 |
| 2.29  | 2.64  | 2.46   | 0.0103 | 0.0105 | 0.0109 | 1.71E-05 |
| 2.22  | 2.39  | 2.56   | 0.0103 | 0.0105 | 0.0109 | 1.72E-05 |
| 4.19  | 4.03  | 4.62   | 0.0103 | 0.0105 | 0.0109 | 1.72E-05 |
| 2.61  | 2.7   | 2.35   | 0.0103 | 0.0105 | 0.0109 | 1.72E-05 |
| 2.61  | 2.7   | 2.35   | 0.0103 | 0.0105 | 0.0109 | 1.72E-05 |
| 2.71  | 3.12  | 2.87   | 0.0103 | 0.0105 | 0.0109 | 1.72E-05 |
| 2.71  | 3.12  | 2.87   | 0.0103 | 0.0105 | 0.0109 | 1.72E-05 |
| 2.71  | 3.12  | 2.87   | 0.0103 | 0.0105 | 0.0109 | 1.72E-05 |
| 2.71  | 3.12  | 2.87   | 0.0103 | 0.0105 | 0.0109 | 1.72E-05 |
| 3.25  | 2.9   | 3.32   | 0.0103 | 0.0105 | 0.0109 | 1.72E-05 |
| 3.25  | 2.9   | 3.32   | 0.0103 | 0.0105 | 0.0109 | 1.72E-05 |
| 3.6   | 3.12  | 3.36   | 0.0103 | 0.0105 | 0.0109 | 1.74E-05 |
| 3.03  | 2.67  | 3.03   | 0.0103 | 0.0105 | 0.0109 | 1.74E-05 |
| 0.011 | 0.012 | 0.0117 | 2.52   | 2.61   | 2.27   | 1.75E-05 |
| 2.03  | 2.34  | 2.23   | 0.0103 | 0.0105 | 0.0109 | 1.75E-05 |
| 2.5   | 2.23  | 2.2    | 0.0103 | 0.0105 | 0.0109 | 1.76E-05 |
| 0.011 | 0.012 | 0.0117 | 2.61   | 2.67   | 2.33   | 1.76E-05 |
| 0.011 | 0.012 | 0.0117 | 2.61   | 2.67   | 2.33   | 1.76E-05 |
| 2.4   | 2.11  | 2.39   | 0.0103 | 0.0105 | 0.0109 | 1.76E-05 |
| 2.16  | 2.16  | 2.44   | 0.0103 | 0.0105 | 0.0109 | 1.78E-05 |
| 4.44  | 3.98  | 3.89   | 0.0103 | 0.0105 | 0.0109 | 1.78E-05 |
| 3.99  | 4.55  | 4.07   | 0.0103 | 0.0105 | 0.0109 | 1.79E-05 |
| 3.62  | 3.21  | 3.67   | 0.0103 | 0.0105 | 0.0109 | 1.80E-05 |
| 3.62  | 3.21  | 3.67   | 0.0103 | 0.0105 | 0.0109 | 1.80E-05 |
| 3.62  | 3.21  | 3.67   | 0.0103 | 0.0105 | 0.0109 | 1.80E-05 |
| 0.011 | 0.012 | 0.0117 | 2.72   | 2.39   | 2.71   | 1.80E-05 |
| 2.24  | 2.57  | 2.51   | 0.0103 | 0.0105 | 0.0109 | 1.81E-05 |
| 3.53  | 3.1   | 3.15   | 0.0103 | 0.0105 | 0.0109 | 1.81E-05 |
| 3.53  | 3.1   | 3.15   | 0.0103 | 0.0105 | 0.0109 | 1.81E-05 |
| 3.53  | 3.1   | 3.15   | 0.0103 | 0.0105 | 0.0109 | 1.81E-05 |
| 2.43  | 2.15  | 2.15   | 0.0103 | 0.0105 | 0.0109 | 1.81E-05 |
| 2.8   | 2.97  | 2.57   | 0.0103 | 0.0105 | 0.0109 | 1.82E-05 |
| 3.5   | 3.21  | 3.71   | 0.0103 | 0.0105 | 0.0109 | 1.82E-05 |
| 2.4   | 2.3   | 2.08   | 0.0103 | 0.0105 | 0.0109 | 1.85E-05 |
| 3.13  | 3.62  | 3.38   | 0.0103 | 0.0105 | 0.0109 | 1.85E-05 |
| 3.13  | 3.62  | 3.38   | 0.0103 | 0.0105 | 0.0109 | 1.85E-05 |

|       |       |        |        |        |        |          |
|-------|-------|--------|--------|--------|--------|----------|
| 3.13  | 3.62  | 3.38   | 0.0103 | 0.0105 | 0.0109 | 1.85E-05 |
| 3.13  | 3.62  | 3.38   | 0.0103 | 0.0105 | 0.0109 | 1.85E-05 |
| 2.52  | 2.21  | 2.25   | 0.0103 | 0.0105 | 0.0109 | 1.85E-05 |
| 3.43  | 3.04  | 3.48   | 0.0103 | 0.0105 | 0.0109 | 1.86E-05 |
| 3.43  | 3.04  | 3.48   | 0.0103 | 0.0105 | 0.0109 | 1.86E-05 |
| 3.95  | 4.57  | 4.3    | 0.0103 | 0.0105 | 0.0109 | 1.86E-05 |
| 2.95  | 2.69  | 2.56   | 0.0103 | 0.0105 | 0.0109 | 1.86E-05 |
| 2.95  | 2.69  | 2.56   | 0.0103 | 0.0105 | 0.0109 | 1.86E-05 |
| 2.95  | 2.69  | 2.56   | 0.0103 | 0.0105 | 0.0109 | 1.86E-05 |
| 2.95  | 2.69  | 2.56   | 0.0103 | 0.0105 | 0.0109 | 1.86E-05 |
| 2.95  | 2.69  | 2.56   | 0.0103 | 0.0105 | 0.0109 | 1.86E-05 |
| 2.95  | 2.69  | 2.56   | 0.0103 | 0.0105 | 0.0109 | 1.86E-05 |
| 4.95  | 4.39  | 5.03   | 0.0103 | 0.0105 | 0.0109 | 1.87E-05 |
| 2.61  | 2.84  | 3.02   | 0.0103 | 0.0105 | 0.0109 | 1.88E-05 |
| 2.25  | 2.5   | 2.18   | 0.0103 | 0.0105 | 0.0109 | 1.89E-05 |
| 2.61  | 2.5   | 2.26   | 0.0103 | 0.0105 | 0.0109 | 1.89E-05 |
| 2.61  | 2.5   | 2.26   | 0.0103 | 0.0105 | 0.0109 | 1.89E-05 |
| 2.42  | 2.72  | 2.78   | 0.0103 | 0.0105 | 0.0109 | 1.91E-05 |
| 2.34  | 2.36  | 2.66   | 0.0103 | 0.0105 | 0.0109 | 1.91E-05 |
| 2.34  | 2.36  | 2.66   | 0.0103 | 0.0105 | 0.0109 | 1.91E-05 |
| 2.25  | 2.6   | 2.49   | 0.0103 | 0.0105 | 0.0109 | 1.92E-05 |
| 0.011 | 0.012 | 0.0117 | 2.46   | 2.25   | 2.13   | 1.94E-05 |
| 3.06  | 2.76  | 3.19   | 0.0103 | 0.0105 | 0.0109 | 1.94E-05 |
| 3.06  | 2.76  | 3.19   | 0.0103 | 0.0105 | 0.0109 | 1.94E-05 |
| 2.29  | 2.03  | 2.33   | 0.0103 | 0.0105 | 0.0109 | 1.96E-05 |
| 2.29  | 2.03  | 2.33   | 0.0103 | 0.0105 | 0.0109 | 1.96E-05 |
| 3.65  | 3.26  | 3.19   | 0.0103 | 0.0105 | 0.0109 | 1.96E-05 |
| 4.4   | 3.88  | 4.44   | 0.0103 | 0.0105 | 0.0109 | 1.96E-05 |
| 0.011 | 0.012 | 0.0117 | 3.14   | 3.35   | 2.89   | 1.97E-05 |
| 3.02  | 3.44  | 3.05   | 0.0103 | 0.0105 | 0.0109 | 1.99E-05 |
| 3.36  | 2.91  | 3.25   | 0.0103 | 0.0105 | 0.0109 | 1.99E-05 |
| 3.36  | 2.91  | 3.25   | 0.0103 | 0.0105 | 0.0109 | 1.99E-05 |
| 3.23  | 2.88  | 3.32   | 0.0103 | 0.0105 | 0.0109 | 2.00E-05 |
| 0.011 | 0.012 | 0.0117 | 2.8    | 2.44   | 2.76   | 2.01E-05 |
| 3.93  | 3.74  | 3.39   | 0.0103 | 0.0105 | 0.0109 | 2.03E-05 |
| 2.61  | 2.69  | 2.33   | 0.0103 | 0.0105 | 0.0109 | 2.04E-05 |
| 2.61  | 2.69  | 2.33   | 0.0103 | 0.0105 | 0.0109 | 2.04E-05 |
| 2.39  | 2.12  | 2.44   | 0.0103 | 0.0105 | 0.0109 | 2.04E-05 |
| 0.011 | 0.012 | 0.0117 | 2.63   | 2.3    | 2.34   | 2.05E-05 |
| 2.36  | 2.74  | 2.58   | 0.0103 | 0.0105 | 0.0109 | 2.07E-05 |
| 2.36  | 2.74  | 2.58   | 0.0103 | 0.0105 | 0.0109 | 2.07E-05 |
| 2.05  | 2.21  | 2.38   | 0.0103 | 0.0105 | 0.0109 | 2.07E-05 |
| 4.37  | 5.03  | 4.94   | 0.0103 | 0.0105 | 0.0109 | 2.09E-05 |
| 0.011 | 0.012 | 0.0117 | 2.8    | 2.62   | 2.41   | 2.10E-05 |
| 3.17  | 3.22  | 2.8    | 0.0103 | 0.0105 | 0.0109 | 2.10E-05 |
| 0.011 | 0.012 | 0.0117 | 3.37   | 3.88   | 3.48   | 2.11E-05 |
| 4.52  | 4.19  | 4.87   | 0.0103 | 0.0105 | 0.0109 | 2.12E-05 |
| 2.64  | 3.06  | 2.94   | 0.0103 | 0.0105 | 0.0109 | 2.13E-05 |
| 2.21  | 2.11  | 2.44   | 0.0103 | 0.0105 | 0.0109 | 2.13E-05 |
| 2.4   | 2.44  | 2.12   | 0.0103 | 0.0105 | 0.0109 | 2.14E-05 |
| 2.4   | 2.44  | 2.12   | 0.0103 | 0.0105 | 0.0109 | 2.14E-05 |
| 2.58  | 2.44  | 2.22   | 0.0103 | 0.0105 | 0.0109 | 2.14E-05 |
| 0.011 | 0.012 | 0.0117 | 2.98   | 2.8    | 3.25   | 2.14E-05 |
| 0.011 | 0.012 | 0.0117 | 2.98   | 2.8    | 3.25   | 2.14E-05 |
| 3.56  | 4.12  | 3.99   | 0.0103 | 0.0105 | 0.0109 | 2.14E-05 |
| 3.56  | 4.12  | 3.99   | 0.0103 | 0.0105 | 0.0109 | 2.14E-05 |
| 2.78  | 3.17  | 2.8    | 0.0103 | 0.0105 | 0.0109 | 2.15E-05 |
| 3.16  | 2.74  | 2.84   | 0.0103 | 0.0105 | 0.0109 | 2.15E-05 |

|       |       |        |        |        |        |          |
|-------|-------|--------|--------|--------|--------|----------|
| 2.73  | 2.43  | 2.38   | 0.0103 | 0.0105 | 0.0109 | 2.15E-05 |
| 5.41  | 5.33  | 4.7    | 0.0103 | 0.0105 | 0.0109 | 2.16E-05 |
| 3.92  | 3.37  | 3.7    | 0.0103 | 0.0105 | 0.0109 | 2.17E-05 |
| 3.92  | 3.37  | 3.7    | 0.0103 | 0.0105 | 0.0109 | 2.17E-05 |
| 3.58  | 3.58  | 4.07   | 0.0103 | 0.0105 | 0.0109 | 2.17E-05 |
| 2.36  | 2.62  | 2.74   | 0.0103 | 0.0105 | 0.0109 | 2.17E-05 |
| 3.7   | 3.48  | 3.18   | 0.0103 | 0.0105 | 0.0109 | 2.18E-05 |
| 0.011 | 0.012 | 0.0117 | 3.03   | 2.83   | 3.29   | 2.19E-05 |
| 0.011 | 0.012 | 0.0117 | 3.03   | 2.83   | 3.29   | 2.19E-05 |
| 0.011 | 0.012 | 0.0117 | 2.79   | 3.23   | 3.13   | 2.19E-05 |
| 2.9   | 2.5   | 2.79   | 0.0103 | 0.0105 | 0.0109 | 2.19E-05 |
| 3.06  | 2.63  | 2.89   | 0.0103 | 0.0105 | 0.0109 | 2.20E-05 |
| 0.011 | 0.012 | 0.0117 | 2.52   | 2.4    | 2.78   | 2.20E-05 |
| 2.16  | 2.48  | 2.46   | 0.0103 | 0.0105 | 0.0109 | 2.21E-05 |
| 2.47  | 2.83  | 2.51   | 0.0103 | 0.0105 | 0.0109 | 2.21E-05 |
| 2.47  | 2.83  | 2.51   | 0.0103 | 0.0105 | 0.0109 | 2.21E-05 |
| 0.011 | 0.012 | 0.0117 | 2.5    | 2.74   | 2.36   | 2.22E-05 |
| 0.011 | 0.012 | 0.0117 | 2.49   | 2.71   | 2.33   | 2.24E-05 |
| 0.011 | 0.012 | 0.0117 | 3.05   | 3.12   | 2.7    | 2.24E-05 |
| 0.011 | 0.012 | 0.0117 | 3.61   | 3.41   | 3.1    | 2.25E-05 |
| 0.011 | 0.012 | 0.0117 | 3.61   | 3.41   | 3.1    | 2.25E-05 |
| 0.011 | 0.012 | 0.0117 | 3.61   | 3.41   | 3.1    | 2.25E-05 |
| 3.02  | 3     | 2.63   | 0.0103 | 0.0105 | 0.0109 | 2.25E-05 |
| 2.78  | 2.65  | 2.39   | 0.0103 | 0.0105 | 0.0109 | 2.25E-05 |
| 0.011 | 0.012 | 0.0117 | 2.99   | 2.68   | 2.59   | 2.26E-05 |
| 5.35  | 4.59  | 5      | 0.0103 | 0.0105 | 0.0109 | 2.26E-05 |
| 5.35  | 4.59  | 5      | 0.0103 | 0.0105 | 0.0109 | 2.26E-05 |
| 2.71  | 2.48  | 2.33   | 0.0103 | 0.0105 | 0.0109 | 2.27E-05 |
| 0.011 | 0.012 | 0.0117 | 2.42   | 2.24   | 2.61   | 2.28E-05 |
| 0.011 | 0.012 | 0.0117 | 2.42   | 2.24   | 2.61   | 2.28E-05 |
| 2.66  | 3.09  | 2.81   | 0.0103 | 0.0105 | 0.0109 | 2.29E-05 |
| 2.66  | 3.09  | 2.81   | 0.0103 | 0.0105 | 0.0109 | 2.29E-05 |
| 2.66  | 3.09  | 2.81   | 0.0103 | 0.0105 | 0.0109 | 2.29E-05 |
| 3.2   | 3.03  | 3.52   | 0.0103 | 0.0105 | 0.0109 | 2.29E-05 |
| 3.2   | 3.03  | 3.52   | 0.0103 | 0.0105 | 0.0109 | 2.29E-05 |
| 3.2   | 3.03  | 3.52   | 0.0103 | 0.0105 | 0.0109 | 2.29E-05 |
| 2.4   | 2.54  | 2.18   | 0.0103 | 0.0105 | 0.0109 | 2.29E-05 |
| 2.9   | 3.38  | 3.19   | 0.0103 | 0.0105 | 0.0109 | 2.29E-05 |
| 2.34  | 2.67  | 2.69   | 0.0103 | 0.0105 | 0.0109 | 2.30E-05 |
| 2.34  | 2.67  | 2.69   | 0.0103 | 0.0105 | 0.0109 | 2.30E-05 |
| 2.46  | 2.31  | 2.11   | 0.0103 | 0.0105 | 0.0109 | 2.30E-05 |
| 2.44  | 2.34  | 2.71   | 0.0103 | 0.0105 | 0.0109 | 2.31E-05 |
| 3.72  | 3.21  | 3.62   | 0.0103 | 0.0105 | 0.0109 | 2.32E-05 |
| 2.73  | 3.11  | 2.73   | 0.0103 | 0.0105 | 0.0109 | 2.32E-05 |
| 3.12  | 3.09  | 2.71   | 0.0103 | 0.0105 | 0.0109 | 2.33E-05 |
| 0.011 | 0.012 | 0.0117 | 3.2    | 3.1    | 3.58   | 2.33E-05 |
| 4.62  | 4.21  | 3.97   | 0.0103 | 0.0105 | 0.0109 | 2.34E-05 |
| 3.1   | 3     | 2.67   | 0.0103 | 0.0105 | 0.0109 | 2.34E-05 |
| 2.46  | 2.42  | 2.13   | 0.0103 | 0.0105 | 0.0109 | 2.36E-05 |
| 2.46  | 2.42  | 2.13   | 0.0103 | 0.0105 | 0.0109 | 2.36E-05 |
| 2.34  | 2.73  | 2.58   | 0.0103 | 0.0105 | 0.0109 | 2.37E-05 |
| 2.34  | 2.73  | 2.58   | 0.0103 | 0.0105 | 0.0109 | 2.37E-05 |
| 3.09  | 2.69  | 3.08   | 0.0103 | 0.0105 | 0.0109 | 2.38E-05 |
| 0.011 | 0.012 | 0.0117 | 2.26   | 2.33   | 2.61   | 2.38E-05 |
| 0.011 | 0.012 | 0.0117 | 2.26   | 2.33   | 2.61   | 2.38E-05 |
| 2.62  | 2.51  | 2.25   | 0.0103 | 0.0105 | 0.0109 | 2.38E-05 |
| 0.011 | 0.012 | 0.0117 | 2.94   | 3.41   | 3.07   | 2.38E-05 |
| 0.011 | 0.012 | 0.0117 | 3.17   | 3.7    | 3.41   | 2.40E-05 |



|       |       |        |        |        |        |          |
|-------|-------|--------|--------|--------|--------|----------|
| 2.43  | 2.76  | 2.81   | 0.0103 | 0.0105 | 0.0109 | 2.40E-05 |
| 2.73  | 2.34  | 2.5    | 0.0103 | 0.0105 | 0.0109 | 2.44E-05 |
| 4.11  | 4.53  | 3.89   | 0.0103 | 0.0105 | 0.0109 | 2.44E-05 |
| 4.11  | 4.53  | 3.89   | 0.0103 | 0.0105 | 0.0109 | 2.44E-05 |
| 4.11  | 4.53  | 3.89   | 0.0103 | 0.0105 | 0.0109 | 2.44E-05 |
| 2.31  | 2.24  | 2.59   | 0.0103 | 0.0105 | 0.0109 | 2.45E-05 |
| 2.31  | 2.24  | 2.59   | 0.0103 | 0.0105 | 0.0109 | 2.45E-05 |
| 2.5   | 2.42  | 2.8    | 0.0103 | 0.0105 | 0.0109 | 2.46E-05 |
| 3.87  | 3.37  | 3.87   | 0.0103 | 0.0105 | 0.0109 | 2.46E-05 |
| 2.6   | 2.23  | 2.49   | 0.0103 | 0.0105 | 0.0109 | 2.46E-05 |
| 3.05  | 2.98  | 2.63   | 0.0103 | 0.0105 | 0.0109 | 2.46E-05 |
| 2     | 2.33  | 2.24   | 0.0103 | 0.0105 | 0.0109 | 2.47E-05 |
| 0.011 | 0.012 | 0.0117 | 2.36   | 2.7    | 2.72   | 2.48E-05 |
| 2.42  | 2.24  | 2.07   | 0.0103 | 0.0105 | 0.0109 | 2.48E-05 |
| 2.42  | 2.24  | 2.07   | 0.0103 | 0.0105 | 0.0109 | 2.48E-05 |
| 0.011 | 0.012 | 0.0117 | 2.36   | 2.76   | 2.56   | 2.49E-05 |
| 3.42  | 3     | 3.47   | 0.0103 | 0.0105 | 0.0109 | 2.50E-05 |
| 3.42  | 3     | 3.47   | 0.0103 | 0.0105 | 0.0109 | 2.50E-05 |
| 0.011 | 0.012 | 0.0117 | 2.82   | 3.3    | 3.09   | 2.52E-05 |
| 0.011 | 0.012 | 0.0117 | 2.82   | 3.3    | 3.09   | 2.52E-05 |
| 2.39  | 2.45  | 2.76   | 0.0103 | 0.0105 | 0.0109 | 2.52E-05 |
| 0.011 | 0.012 | 0.0117 | 3.18   | 3.11   | 2.74   | 2.54E-05 |
| 3.08  | 2.65  | 3      | 0.0103 | 0.0105 | 0.0109 | 2.54E-05 |
| 2.46  | 2.69  | 2.88   | 0.0103 | 0.0105 | 0.0109 | 2.55E-05 |
| 0.011 | 0.012 | 0.0117 | 2.94   | 2.85   | 3.3    | 2.55E-05 |
| 0.011 | 0.012 | 0.0117 | 2.94   | 2.85   | 3.3    | 2.55E-05 |
| 0.011 | 0.012 | 0.0117 | 2.99   | 2.89   | 3.35   | 2.55E-05 |
| 3.25  | 2.85  | 3.3    | 0.0103 | 0.0105 | 0.0109 | 2.56E-05 |
| 3.25  | 2.85  | 3.3    | 0.0103 | 0.0105 | 0.0109 | 2.56E-05 |
| 3.25  | 2.85  | 3.3    | 0.0103 | 0.0105 | 0.0109 | 2.56E-05 |
| 2.95  | 2.67  | 2.53   | 0.0103 | 0.0105 | 0.0109 | 2.56E-05 |
| 2.53  | 2.72  | 2.96   | 0.0103 | 0.0105 | 0.0109 | 2.57E-05 |
| 3.96  | 3.48  | 3.45   | 0.0103 | 0.0105 | 0.0109 | 2.57E-05 |
| 3.96  | 3.48  | 3.45   | 0.0103 | 0.0105 | 0.0109 | 2.57E-05 |
| 3.02  | 2.85  | 2.58   | 0.0103 | 0.0105 | 0.0109 | 2.57E-05 |
| 2.53  | 2.35  | 2.75   | 0.0103 | 0.0105 | 0.0109 | 2.57E-05 |
| 2.53  | 2.78  | 2.38   | 0.0103 | 0.0105 | 0.0109 | 2.58E-05 |
| 3.41  | 3.69  | 3.15   | 0.0103 | 0.0105 | 0.0109 | 2.60E-05 |
| 2.45  | 2.86  | 2.75   | 0.0103 | 0.0105 | 0.0109 | 2.60E-05 |
| 2.45  | 2.86  | 2.75   | 0.0103 | 0.0105 | 0.0109 | 2.60E-05 |
| 3.54  | 3.09  | 3.57   | 0.0103 | 0.0105 | 0.0109 | 2.60E-05 |
| 2.41  | 2.34  | 2.71   | 0.0103 | 0.0105 | 0.0109 | 2.61E-05 |
| 2.41  | 2.34  | 2.71   | 0.0103 | 0.0105 | 0.0109 | 2.61E-05 |
| 0.011 | 0.012 | 0.0117 | 3.2    | 3.65   | 3.71   | 2.62E-05 |
| 3.73  | 3.81  | 3.28   | 0.0103 | 0.0105 | 0.0109 | 2.62E-05 |
| 3.73  | 3.81  | 3.28   | 0.0103 | 0.0105 | 0.0109 | 2.62E-05 |
| 2.11  | 2.45  | 2.4    | 0.0103 | 0.0105 | 0.0109 | 2.62E-05 |
| 2.61  | 2.35  | 2.24   | 0.0103 | 0.0105 | 0.0109 | 2.63E-05 |
| 0.011 | 0.012 | 0.0117 | 2.75   | 3.15   | 3.18   | 2.64E-05 |
| 0.011 | 0.012 | 0.0117 | 3.45   | 3.14   | 2.95   | 2.65E-05 |
| 2.37  | 2.52  | 2.15   | 0.0103 | 0.0105 | 0.0109 | 2.65E-05 |
| 2.37  | 2.52  | 2.15   | 0.0103 | 0.0105 | 0.0109 | 2.65E-05 |
| 2.92  | 2.85  | 2.51   | 0.0103 | 0.0105 | 0.0109 | 2.66E-05 |
| 2.92  | 2.85  | 2.51   | 0.0103 | 0.0105 | 0.0109 | 2.66E-05 |
| 2.73  | 2.64  | 2.34   | 0.0103 | 0.0105 | 0.0109 | 2.66E-05 |
| 2.73  | 2.64  | 2.34   | 0.0103 | 0.0105 | 0.0109 | 2.66E-05 |
| 2.89  | 3.19  | 2.73   | 0.0103 | 0.0105 | 0.0109 | 2.67E-05 |
| 2.89  | 3.19  | 2.73   | 0.0103 | 0.0105 | 0.0109 | 2.67E-05 |

|       |       |        |        |        |        |          |
|-------|-------|--------|--------|--------|--------|----------|
| 3.67  | 3.88  | 3.31   | 0.0103 | 0.0105 | 0.0109 | 2.67E-05 |
| 2.51  | 2.35  | 2.14   | 0.0103 | 0.0105 | 0.0109 | 2.68E-05 |
| 3.52  | 3.07  | 3.08   | 0.0103 | 0.0105 | 0.0109 | 2.69E-05 |
| 3.52  | 3.07  | 3.08   | 0.0103 | 0.0105 | 0.0109 | 2.69E-05 |
| 3.52  | 3.07  | 3.08   | 0.0103 | 0.0105 | 0.0109 | 2.69E-05 |
| 0.011 | 0.012 | 0.0117 | 2.57   | 3      | 2.9    | 2.70E-05 |
| 3.19  | 2.72  | 3.01   | 0.0103 | 0.0105 | 0.0109 | 2.70E-05 |
| 2.83  | 3.24  | 2.83   | 0.0103 | 0.0105 | 0.0109 | 2.70E-05 |
| 4.73  | 4.72  | 4.1    | 0.0103 | 0.0105 | 0.0109 | 2.70E-05 |
| 0.011 | 0.012 | 0.0117 | 3.94   | 4.56   | 4.52   | 2.71E-05 |
| 3.43  | 3.06  | 2.95   | 0.0103 | 0.0105 | 0.0109 | 2.72E-05 |
| 3.1   | 2.78  | 2.66   | 0.0103 | 0.0105 | 0.0109 | 2.72E-05 |
| 3.1   | 2.78  | 2.66   | 0.0103 | 0.0105 | 0.0109 | 2.72E-05 |
| 0.011 | 0.012 | 0.0117 | 2.37   | 2.21   | 2.59   | 2.72E-05 |
| 3.48  | 3.02  | 3.06   | 0.0103 | 0.0105 | 0.0109 | 2.72E-05 |
| 3.48  | 3.02  | 3.06   | 0.0103 | 0.0105 | 0.0109 | 2.72E-05 |
| 2.43  | 2.15  | 2.1    | 0.0103 | 0.0105 | 0.0109 | 2.73E-05 |
| 2.43  | 2.15  | 2.1    | 0.0103 | 0.0105 | 0.0109 | 2.73E-05 |
| 4.41  | 3.76  | 4.18   | 0.0103 | 0.0105 | 0.0109 | 2.73E-05 |
| 2.65  | 2.38  | 2.79   | 0.0103 | 0.0105 | 0.0109 | 2.73E-05 |
| 3.38  | 3.1   | 3.64   | 0.0103 | 0.0105 | 0.0109 | 2.73E-05 |
| 3.38  | 3.1   | 3.64   | 0.0103 | 0.0105 | 0.0109 | 2.73E-05 |
| 3.37  | 3.15  | 2.87   | 0.0103 | 0.0105 | 0.0109 | 2.74E-05 |
| 3.37  | 3.15  | 2.87   | 0.0103 | 0.0105 | 0.0109 | 2.74E-05 |
| 0.011 | 0.012 | 0.0117 | 2.7    | 3.15   | 2.83   | 2.74E-05 |
| 0.011 | 0.012 | 0.0117 | 2.7    | 3.15   | 2.83   | 2.74E-05 |
| 2.01  | 2.21  | 2.36   | 0.0103 | 0.0105 | 0.0109 | 2.75E-05 |
| 2.01  | 2.21  | 2.36   | 0.0103 | 0.0105 | 0.0109 | 2.75E-05 |
| 3.44  | 3.55  | 3.04   | 0.0103 | 0.0105 | 0.0109 | 2.76E-05 |
| 3.44  | 3.55  | 3.04   | 0.0103 | 0.0105 | 0.0109 | 2.76E-05 |
| 3.44  | 3.55  | 3.04   | 0.0103 | 0.0105 | 0.0109 | 2.76E-05 |
| 2.32  | 2.71  | 2.44   | 0.0103 | 0.0105 | 0.0109 | 2.77E-05 |
| 2.44  | 2.73  | 2.86   | 0.0103 | 0.0105 | 0.0109 | 2.78E-05 |
| 2.44  | 2.73  | 2.86   | 0.0103 | 0.0105 | 0.0109 | 2.78E-05 |
| 2.8   | 3.27  | 3.17   | 0.0103 | 0.0105 | 0.0109 | 2.78E-05 |
| 2.8   | 3.27  | 3.17   | 0.0103 | 0.0105 | 0.0109 | 2.78E-05 |
| 2.92  | 3.16  | 2.69   | 0.0103 | 0.0105 | 0.0109 | 2.79E-05 |
| 2.43  | 2.62  | 2.23   | 0.0103 | 0.0105 | 0.0109 | 2.79E-05 |
| 2.43  | 2.62  | 2.23   | 0.0103 | 0.0105 | 0.0109 | 2.79E-05 |
| 0.011 | 0.012 | 0.0117 | 2.73   | 2.84   | 3.18   | 2.79E-05 |
| 2.59  | 2.25  | 2.27   | 0.0103 | 0.0105 | 0.0109 | 2.81E-05 |
| 3.74  | 3.91  | 3.83   | 2.34   | 2.15   | 2.21   | 2.83E-05 |
| 3.32  | 2.89  | 3.35   | 0.0103 | 0.0105 | 0.0109 | 2.83E-05 |
| 3.32  | 2.89  | 3.35   | 0.0103 | 0.0105 | 0.0109 | 2.83E-05 |
| 4.54  | 3.87  | 4.34   | 0.0103 | 0.0105 | 0.0109 | 2.85E-05 |
| 2.7   | 2.34  | 2.37   | 0.0103 | 0.0105 | 0.0109 | 2.86E-05 |
| 2.63  | 2.25  | 2.55   | 0.0103 | 0.0105 | 0.0109 | 2.86E-05 |
| 2.63  | 2.25  | 2.55   | 0.0103 | 0.0105 | 0.0109 | 2.86E-05 |
| 0.011 | 0.012 | 0.0117 | 2.88   | 3.07   | 2.61   | 2.88E-05 |
| 0.011 | 0.012 | 0.0117 | 2.88   | 3.07   | 2.61   | 2.88E-05 |
| 2.6   | 3.05  | 2.92   | 0.0103 | 0.0105 | 0.0109 | 2.88E-05 |
| 2.6   | 3.05  | 2.92   | 0.0103 | 0.0105 | 0.0109 | 2.88E-05 |
| 2.87  | 2.45  | 2.59   | 0.0103 | 0.0105 | 0.0109 | 2.89E-05 |
| 5.52  | 5.41  | 5.32   | 3.44   | 3.5    | 3.25   | 2.89E-05 |
| 5.52  | 5.41  | 5.32   | 3.44   | 3.5    | 3.25   | 2.89E-05 |
| 5.52  | 5.41  | 5.32   | 3.44   | 3.5    | 3.25   | 2.89E-05 |
| 0.011 | 0.012 | 0.0117 | 2.64   | 3.06   | 2.7    | 2.89E-05 |
| 0.011 | 0.012 | 0.0117 | 2.64   | 3.06   | 2.7    | 2.89E-05 |

|       |       |        |        |        |        |          |
|-------|-------|--------|--------|--------|--------|----------|
| 3.72  | 3.6   | 4.19   | 0.0103 | 0.0105 | 0.0109 | 2.90E-05 |
| 0.011 | 0.012 | 0.0117 | 2.75   | 3.2    | 2.84   | 2.91E-05 |
| 2.79  | 2.59  | 2.37   | 0.0103 | 0.0105 | 0.0109 | 2.92E-05 |
| 4.05  | 4.21  | 3.59   | 0.0103 | 0.0105 | 0.0109 | 2.93E-05 |
| 2.13  | 2.49  | 2.42   | 0.0103 | 0.0105 | 0.0109 | 2.93E-05 |
| 3.25  | 3.17  | 3.68   | 0.0103 | 0.0105 | 0.0109 | 2.93E-05 |
| 3.25  | 3.17  | 3.68   | 0.0103 | 0.0105 | 0.0109 | 2.93E-05 |
| 3.25  | 3.17  | 3.68   | 0.0103 | 0.0105 | 0.0109 | 2.93E-05 |
| 4.59  | 4.54  | 3.95   | 0.0103 | 0.0105 | 0.0109 | 2.95E-05 |
| 4.59  | 4.54  | 3.95   | 0.0103 | 0.0105 | 0.0109 | 2.95E-05 |
| 4.59  | 4.54  | 3.95   | 0.0103 | 0.0105 | 0.0109 | 2.95E-05 |
| 2.42  | 2.74  | 2.36   | 0.0103 | 0.0105 | 0.0109 | 2.95E-05 |
| 0.011 | 0.012 | 0.0117 | 2.73   | 2.93   | 3.21   | 2.95E-05 |
| 3.24  | 3.34  | 3.77   | 0.0103 | 0.0105 | 0.0109 | 2.95E-05 |
| 2.52  | 2.57  | 2.92   | 0.0103 | 0.0105 | 0.0109 | 2.96E-05 |
| 3.24  | 3.02  | 2.75   | 0.0103 | 0.0105 | 0.0109 | 2.97E-05 |
| 3.24  | 3.02  | 2.75   | 0.0103 | 0.0105 | 0.0109 | 2.97E-05 |
| 0.011 | 0.012 | 0.0117 | 2.56   | 2.92   | 2.99   | 2.98E-05 |
| 0.011 | 0.012 | 0.0117 | 2.97   | 3.46   | 3.07   | 2.98E-05 |
| 2.68  | 2.92  | 2.48   | 0.0103 | 0.0105 | 0.0109 | 2.99E-05 |
| 2.68  | 2.92  | 2.48   | 0.0103 | 0.0105 | 0.0109 | 2.99E-05 |
| 3.68  | 3.65  | 4.21   | 0.0103 | 0.0105 | 0.0109 | 2.99E-05 |
| 2.1   | 2.21  | 2.46   | 0.0103 | 0.0105 | 0.0109 | 2.99E-05 |
| 3.1   | 2.8   | 2.64   | 0.0103 | 0.0105 | 0.0109 | 3.02E-05 |
| 3.1   | 2.8   | 2.64   | 0.0103 | 0.0105 | 0.0109 | 3.02E-05 |
| 0.011 | 0.012 | 0.0117 | 3.36   | 2.85   | 3.14   | 3.02E-05 |
| 2.63  | 2.55  | 2.97   | 0.0103 | 0.0105 | 0.0109 | 3.03E-05 |
| 2.72  | 2.41  | 2.83   | 0.0103 | 0.0105 | 0.0109 | 3.03E-05 |
| 3.23  | 3.77  | 3.35   | 0.0103 | 0.0105 | 0.0109 | 3.03E-05 |
| 3.68  | 3.14  | 3.3    | 0.0103 | 0.0105 | 0.0109 | 3.04E-05 |
| 2.29  | 2.27  | 2.62   | 0.0103 | 0.0105 | 0.0109 | 3.04E-05 |
| 3.24  | 2.78  | 3.19   | 0.0103 | 0.0105 | 0.0109 | 3.04E-05 |
| 2.91  | 2.47  | 2.75   | 0.0103 | 0.0105 | 0.0109 | 3.04E-05 |
| 2.4   | 2.62  | 2.83   | 0.0103 | 0.0105 | 0.0109 | 3.04E-05 |
| 2.4   | 2.62  | 2.83   | 0.0103 | 0.0105 | 0.0109 | 3.04E-05 |
| 2.51  | 2.96  | 2.77   | 0.0103 | 0.0105 | 0.0109 | 3.05E-05 |
| 2.51  | 2.96  | 2.77   | 0.0103 | 0.0105 | 0.0109 | 3.05E-05 |
| 2.56  | 2.34  | 2.76   | 0.0103 | 0.0105 | 0.0109 | 3.06E-05 |
| 2.36  | 2.6   | 2.21   | 0.0103 | 0.0105 | 0.0109 | 3.07E-05 |
| 4.3   | 4.65  | 3.94   | 0.0103 | 0.0105 | 0.0109 | 3.09E-05 |
| 4.3   | 4.65  | 3.94   | 0.0103 | 0.0105 | 0.0109 | 3.09E-05 |
| 4.3   | 4.65  | 3.94   | 0.0103 | 0.0105 | 0.0109 | 3.09E-05 |
| 2.95  | 2.61  | 2.53   | 0.0103 | 0.0105 | 0.0109 | 3.12E-05 |
| 2.95  | 2.61  | 2.53   | 0.0103 | 0.0105 | 0.0109 | 3.12E-05 |
| 2.95  | 2.61  | 2.53   | 0.0103 | 0.0105 | 0.0109 | 3.12E-05 |
| 3.15  | 2.67  | 2.97   | 0.0103 | 0.0105 | 0.0109 | 3.12E-05 |
| 3.15  | 2.67  | 2.97   | 0.0103 | 0.0105 | 0.0109 | 3.12E-05 |
| 3.07  | 2.77  | 2.61   | 0.0103 | 0.0105 | 0.0109 | 3.15E-05 |
| 2.95  | 2.5   | 2.79   | 0.0103 | 0.0105 | 0.0109 | 3.17E-05 |
| 2.95  | 2.5   | 2.79   | 0.0103 | 0.0105 | 0.0109 | 3.17E-05 |
| 2.95  | 2.5   | 2.79   | 0.0103 | 0.0105 | 0.0109 | 3.17E-05 |
| 3.14  | 2.66  | 2.97   | 0.0103 | 0.0105 | 0.0109 | 3.20E-05 |
| 2.74  | 2.37  | 2.39   | 0.0103 | 0.0105 | 0.0109 | 3.20E-05 |
| 2.74  | 2.37  | 2.39   | 0.0103 | 0.0105 | 0.0109 | 3.20E-05 |
| 3.24  | 2.79  | 2.84   | 0.0103 | 0.0105 | 0.0109 | 3.22E-05 |
| 3.24  | 2.79  | 2.84   | 0.0103 | 0.0105 | 0.0109 | 3.22E-05 |
| 0.011 | 0.012 | 0.0117 | 3.56   | 3.71   | 3.15   | 3.23E-05 |
| 3.56  | 3.32  | 3.01   | 0.0103 | 0.0105 | 0.0109 | 3.25E-05 |

|       |       |        |        |        |        |          |
|-------|-------|--------|--------|--------|--------|----------|
| 0.011 | 0.012 | 0.0117 | 3.03   | 3.22   | 3.57   | 3.26E-05 |
| 2.99  | 2.82  | 2.53   | 0.0103 | 0.0105 | 0.0109 | 3.27E-05 |
| 2.99  | 2.82  | 2.53   | 0.0103 | 0.0105 | 0.0109 | 3.27E-05 |
| 2.63  | 2.28  | 2.66   | 0.0103 | 0.0105 | 0.0109 | 3.28E-05 |
| 2.63  | 2.28  | 2.66   | 0.0103 | 0.0105 | 0.0109 | 3.28E-05 |
| 2.44  | 2.25  | 2.66   | 0.0103 | 0.0105 | 0.0109 | 3.28E-05 |
| 2.44  | 2.25  | 2.66   | 0.0103 | 0.0105 | 0.0109 | 3.28E-05 |
| 2.41  | 2.2   | 2.04   | 0.0103 | 0.0105 | 0.0109 | 3.29E-05 |
| 3.31  | 3.35  | 2.87   | 0.0103 | 0.0105 | 0.0109 | 3.29E-05 |
| 3.31  | 3.35  | 2.87   | 0.0103 | 0.0105 | 0.0109 | 3.29E-05 |
| 4.23  | 3.58  | 3.85   | 0.0103 | 0.0105 | 0.0109 | 3.31E-05 |
| 2.32  | 2.04  | 2.4    | 0.0103 | 0.0105 | 0.0109 | 3.31E-05 |
| 2.32  | 2.04  | 2.4    | 0.0103 | 0.0105 | 0.0109 | 3.31E-05 |
| 3.24  | 2.94  | 3.48   | 0.0103 | 0.0105 | 0.0109 | 3.31E-05 |
| 3.24  | 2.94  | 3.48   | 0.0103 | 0.0105 | 0.0109 | 3.31E-05 |
| 2.38  | 2.76  | 2.41   | 0.0103 | 0.0105 | 0.0109 | 3.31E-05 |
| 2.38  | 2.76  | 2.41   | 0.0103 | 0.0105 | 0.0109 | 3.31E-05 |
| 0.011 | 0.012 | 0.0117 | 2.57   | 3.04   | 2.86   | 3.32E-05 |
| 2.18  | 2.41  | 2.58   | 0.0103 | 0.0105 | 0.0109 | 3.32E-05 |
| 0.011 | 0.012 | 0.0117 | 2.75   | 2.88   | 2.44   | 3.33E-05 |
| 2.67  | 3.11  | 2.73   | 0.0103 | 0.0105 | 0.0109 | 3.33E-05 |
| 2.67  | 3.11  | 2.73   | 0.0103 | 0.0105 | 0.0109 | 3.33E-05 |
| 2.84  | 2.96  | 2.51   | 0.0103 | 0.0105 | 0.0109 | 3.34E-05 |
| 2.84  | 2.96  | 2.51   | 0.0103 | 0.0105 | 0.0109 | 3.34E-05 |
| 2.9   | 2.72  | 3.21   | 0.0103 | 0.0105 | 0.0109 | 3.35E-05 |
| 2.9   | 2.72  | 3.21   | 0.0103 | 0.0105 | 0.0109 | 3.35E-05 |
| 2.77  | 3.12  | 2.66   | 0.0103 | 0.0105 | 0.0109 | 3.36E-05 |
| 3.66  | 3.61  | 3.13   | 0.0103 | 0.0105 | 0.0109 | 3.37E-05 |
| 3.66  | 3.61  | 3.13   | 0.0103 | 0.0105 | 0.0109 | 3.37E-05 |
| 2.9   | 2.53  | 2.97   | 0.0103 | 0.0105 | 0.0109 | 3.39E-05 |
| 2.9   | 2.53  | 2.97   | 0.0103 | 0.0105 | 0.0109 | 3.39E-05 |
| 2.83  | 2.39  | 2.66   | 0.0103 | 0.0105 | 0.0109 | 3.40E-05 |
| 2.83  | 2.39  | 2.66   | 0.0103 | 0.0105 | 0.0109 | 3.40E-05 |
| 2.44  | 2.87  | 2.79   | 0.0103 | 0.0105 | 0.0109 | 3.43E-05 |
| 3.35  | 3.02  | 3.58   | 0.0103 | 0.0105 | 0.0109 | 3.45E-05 |
| 0.011 | 0.012 | 0.0117 | 3.83   | 3.74   | 3.26   | 3.45E-05 |
| 3.46  | 3.91  | 4.09   | 0.0103 | 0.0105 | 0.0109 | 3.45E-05 |
| 3.46  | 3.91  | 4.09   | 0.0103 | 0.0105 | 0.0109 | 3.45E-05 |
| 0.011 | 0.012 | 0.0117 | 2.95   | 2.5    | 2.65   | 3.46E-05 |
| 0.011 | 0.012 | 0.0117 | 2.95   | 2.5    | 2.65   | 3.46E-05 |
| 2.63  | 2.22  | 2.48   | 0.0103 | 0.0105 | 0.0109 | 3.47E-05 |
| 2.52  | 2.21  | 2.16   | 0.0103 | 0.0105 | 0.0109 | 3.47E-05 |
| 2.64  | 3.06  | 2.66   | 0.0103 | 0.0105 | 0.0109 | 3.48E-05 |
| 2.64  | 3.06  | 2.66   | 0.0103 | 0.0105 | 0.0109 | 3.48E-05 |
| 3.21  | 2.73  | 3.13   | 0.0103 | 0.0105 | 0.0109 | 3.48E-05 |
| 3.21  | 2.73  | 3.13   | 0.0103 | 0.0105 | 0.0109 | 3.48E-05 |
| 3.21  | 2.73  | 3.13   | 0.0103 | 0.0105 | 0.0109 | 3.48E-05 |
| 2.75  | 3.02  | 2.55   | 0.0103 | 0.0105 | 0.0109 | 3.48E-05 |
| 2.75  | 3.02  | 2.55   | 0.0103 | 0.0105 | 0.0109 | 3.48E-05 |
| 3.19  | 2.93  | 2.69   | 0.0103 | 0.0105 | 0.0109 | 3.50E-05 |
| 0.011 | 0.012 | 0.0117 | 2.87   | 3.06   | 2.58   | 3.52E-05 |
| 0.011 | 0.012 | 0.0117 | 2.87   | 3.06   | 2.58   | 3.52E-05 |
| 2.745 | 2.57  | 3.04   | 0.0103 | 0.0105 | 0.0109 | 3.52E-05 |
| 2.84  | 2.84  | 2.44   | 0.0103 | 0.0105 | 0.0109 | 3.53E-05 |
| 3.47  | 3.89  | 3.3    | 0.0103 | 0.0105 | 0.0109 | 3.54E-05 |
| 4.34  | 4.86  | 4.12   | 0.0103 | 0.0105 | 0.0109 | 3.55E-05 |
| 2.57  | 2.27  | 2.19   | 0.0103 | 0.0105 | 0.0109 | 3.57E-05 |
| 0.011 | 0.012 | 0.0117 | 3.06   | 2.79   | 2.58   | 3.59E-05 |

|       |       |        |        |        |        |          |
|-------|-------|--------|--------|--------|--------|----------|
| 3.99  | 4.4   | 4.74   | 0.0103 | 0.0105 | 0.0109 | 3.59E-05 |
| 2.73  | 2.39  | 2.82   | 0.0103 | 0.0105 | 0.0109 | 3.59E-05 |
| 3.21  | 3.48  | 2.93   | 0.0103 | 0.0105 | 0.0109 | 3.60E-05 |
| 0.011 | 0.012 | 0.0117 | 2.33   | 2.36   | 2.71   | 3.60E-05 |
| 2.63  | 2.23  | 2.55   | 0.0103 | 0.0105 | 0.0109 | 3.60E-05 |
| 2.63  | 2.23  | 2.55   | 0.0103 | 0.0105 | 0.0109 | 3.60E-05 |
| 2.88  | 2.46  | 2.53   | 0.0103 | 0.0105 | 0.0109 | 3.61E-05 |
| 2.53  | 2.13  | 2.35   | 0.0103 | 0.0105 | 0.0109 | 3.61E-05 |
| 0.011 | 0.012 | 0.0117 | 2.41   | 2.11   | 2.49   | 3.61E-05 |
| 3.6   | 3.07  | 3.55   | 0.0103 | 0.0105 | 0.0109 | 3.62E-05 |
| 3.6   | 3.07  | 3.55   | 0.0103 | 0.0105 | 0.0109 | 3.62E-05 |
| 3.13  | 3.42  | 2.88   | 0.0103 | 0.0105 | 0.0109 | 3.63E-05 |
| 3.13  | 3.42  | 2.88   | 0.0103 | 0.0105 | 0.0109 | 3.63E-05 |
| 3.1   | 2.61  | 2.91   | 0.0103 | 0.0105 | 0.0109 | 3.64E-05 |
| 2.6   | 3.09  | 2.85   | 0.0103 | 0.0105 | 0.0109 | 3.65E-05 |
| 2.19  | 2.58  | 2.29   | 0.0103 | 0.0105 | 0.0109 | 3.67E-05 |
| 2.19  | 2.58  | 2.29   | 0.0103 | 0.0105 | 0.0109 | 3.67E-05 |
| 2.99  | 3.51  | 3.09   | 0.0103 | 0.0105 | 0.0109 | 3.69E-05 |
| 2.5   | 2.37  | 2.8    | 0.0103 | 0.0105 | 0.0109 | 3.69E-05 |
| 0.011 | 0.012 | 0.0117 | 3.67   | 3.47   | 3.09   | 3.70E-05 |
| 4.44  | 3.77  | 3.93   | 0.0103 | 0.0105 | 0.0109 | 3.70E-05 |
| 0.011 | 0.012 | 0.0117 | 2.62   | 2.95   | 3.11   | 3.71E-05 |
| 0.011 | 0.012 | 0.0117 | 2.62   | 2.95   | 3.11   | 3.71E-05 |
| 2.76  | 2.37  | 2.4    | 0.0103 | 0.0105 | 0.0109 | 3.73E-05 |
| 3.35  | 2.87  | 2.92   | 0.0103 | 0.0105 | 0.0109 | 3.74E-05 |
| 0.011 | 0.012 | 0.0117 | 3.74   | 3.22   | 3.24   | 3.75E-05 |
| 0.011 | 0.012 | 0.0117 | 3.74   | 3.22   | 3.24   | 3.75E-05 |
| 0.011 | 0.012 | 0.0117 | 2.76   | 2.88   | 2.43   | 3.76E-05 |
| 0.011 | 0.012 | 0.0117 | 2.76   | 2.88   | 2.43   | 3.76E-05 |
| 2.08  | 2.05  | 2.39   | 0.0103 | 0.0105 | 0.0109 | 3.76E-05 |
| 2.75  | 2.8   | 2.38   | 0.0103 | 0.0105 | 0.0109 | 3.78E-05 |
| 3.5   | 3.12  | 2.96   | 0.0103 | 0.0105 | 0.0109 | 3.78E-05 |
| 0.011 | 0.012 | 0.0117 | 2.84   | 2.57   | 3.06   | 3.80E-05 |
| 2.24  | 2.57  | 2.2    | 0.0103 | 0.0105 | 0.0109 | 3.81E-05 |
| 2.24  | 2.57  | 2.2    | 0.0103 | 0.0105 | 0.0109 | 3.81E-05 |
| 3.15  | 2.74  | 2.7    | 0.0103 | 0.0105 | 0.0109 | 3.81E-05 |
| 3.15  | 2.74  | 2.7    | 0.0103 | 0.0105 | 0.0109 | 3.81E-05 |
| 3.15  | 2.74  | 2.7    | 0.0103 | 0.0105 | 0.0109 | 3.81E-05 |
| 3.15  | 2.74  | 2.7    | 0.0103 | 0.0105 | 0.0109 | 3.81E-05 |
| 3.15  | 2.74  | 2.7    | 0.0103 | 0.0105 | 0.0109 | 3.81E-05 |
| 3.25  | 3.24  | 3.76   | 0.0103 | 0.0105 | 0.0109 | 3.81E-05 |
| 2.04  | 2.4   | 2.36   | 0.0103 | 0.0105 | 0.0109 | 3.84E-05 |
| 2.04  | 2.4   | 2.36   | 0.0103 | 0.0105 | 0.0109 | 3.84E-05 |
| 3.57  | 3.01  | 3.2    | 0.0103 | 0.0105 | 0.0109 | 3.87E-05 |
| 3.57  | 3.01  | 3.2    | 0.0103 | 0.0105 | 0.0109 | 3.87E-05 |
| 3.02  | 3.57  | 3.17   | 0.0103 | 0.0105 | 0.0109 | 3.87E-05 |
| 3.75  | 3.35  | 3.99   | 0.0103 | 0.0105 | 0.0109 | 3.88E-05 |
| 3.16  | 3.67  | 3.17   | 0.0103 | 0.0105 | 0.0109 | 3.89E-05 |
| 3.16  | 3.67  | 3.17   | 0.0103 | 0.0105 | 0.0109 | 3.89E-05 |
| 2.55  | 2.38  | 2.14   | 0.0103 | 0.0105 | 0.0109 | 3.90E-05 |
| 3.11  | 2.75  | 3.27   | 0.0103 | 0.0105 | 0.0109 | 3.90E-05 |
| 0.011 | 0.012 | 0.0117 | 2.74   | 3.24   | 3.15   | 3.91E-05 |
| 0.011 | 0.012 | 0.0117 | 2.74   | 3.24   | 3.15   | 3.91E-05 |
| 3.34  | 3.3   | 3.85   | 0.0103 | 0.0105 | 0.0109 | 3.92E-05 |
| 3.34  | 3.3   | 3.85   | 0.0103 | 0.0105 | 0.0109 | 3.92E-05 |
| 2.81  | 3.32  | 2.94   | 0.0103 | 0.0105 | 0.0109 | 3.92E-05 |
| 2.81  | 3.32  | 2.94   | 0.0103 | 0.0105 | 0.0109 | 3.92E-05 |
| 0.011 | 0.012 | 0.0117 | 2.68   | 2.74   | 3.14   | 3.93E-05 |
| 0.011 | 0.012 | 0.0117 | 2.68   | 2.74   | 3.14   | 3.93E-05 |

|       |       |        |        |        |        |          |
|-------|-------|--------|--------|--------|--------|----------|
| 0.011 | 0.012 | 0.0117 | 2.65   | 3.14   | 2.8    | 3.94E-05 |
| 0.011 | 0.012 | 0.0117 | 2.65   | 3.14   | 2.8    | 3.94E-05 |
| 0.011 | 0.012 | 0.0117 | 2.65   | 3.14   | 2.8    | 3.94E-05 |
| 2.51  | 2.49  | 2.9    | 0.0103 | 0.0105 | 0.0109 | 3.95E-05 |
| 2.13  | 2.5   | 2.48   | 0.0103 | 0.0105 | 0.0109 | 3.96E-05 |
| 3.22  | 3.01  | 2.7    | 0.0103 | 0.0105 | 0.0109 | 3.96E-05 |
| 3.22  | 3.01  | 2.7    | 0.0103 | 0.0105 | 0.0109 | 3.96E-05 |
| 3.22  | 3.02  | 2.7    | 0.0103 | 0.0105 | 0.0109 | 3.99E-05 |
| 3.22  | 3.02  | 2.7    | 0.0103 | 0.0105 | 0.0109 | 3.99E-05 |
| 3.22  | 3.02  | 2.7    | 0.0103 | 0.0105 | 0.0109 | 3.99E-05 |
| 3.72  | 3.12  | 3.5    | 0.0103 | 0.0105 | 0.0109 | 3.99E-05 |
| 3.95  | 3.43  | 4.06   | 0.0103 | 0.0105 | 0.0109 | 4.02E-05 |
| 3.95  | 3.43  | 4.06   | 0.0103 | 0.0105 | 0.0109 | 4.02E-05 |
| 3.95  | 3.43  | 4.06   | 0.0103 | 0.0105 | 0.0109 | 4.02E-05 |
| 2.32  | 2.03  | 2.41   | 0.0103 | 0.0105 | 0.0109 | 4.03E-05 |
| 2.32  | 2.03  | 2.41   | 0.0103 | 0.0105 | 0.0109 | 4.03E-05 |
| 3.115 | 2.62  | 2.795  | 0.0103 | 0.0105 | 0.0109 | 4.04E-05 |
| 3.115 | 2.62  | 2.795  | 0.0103 | 0.0105 | 0.0109 | 4.04E-05 |
| 3.115 | 2.62  | 2.795  | 0.0103 | 0.0105 | 0.0109 | 4.04E-05 |
| 4.72  | 4.69  | 4.02   | 0.0103 | 0.0105 | 0.0109 | 4.04E-05 |
| 4.72  | 4.69  | 4.02   | 0.0103 | 0.0105 | 0.0109 | 4.04E-05 |
| 4.72  | 4.69  | 4.02   | 0.0103 | 0.0105 | 0.0109 | 4.04E-05 |
| 2.56  | 2.2   | 2.21   | 0.0103 | 0.0105 | 0.0109 | 4.05E-05 |
| 0.011 | 0.012 | 0.0117 | 2.62   | 3.12   | 2.97   | 4.06E-05 |
| 2.48  | 2.46  | 2.11   | 0.0103 | 0.0105 | 0.0109 | 4.10E-05 |
| 2.34  | 2.74  | 2.38   | 0.0103 | 0.0105 | 0.0109 | 4.11E-05 |
| 2.34  | 2.74  | 2.38   | 0.0103 | 0.0105 | 0.0109 | 4.11E-05 |
| 0.011 | 0.012 | 0.0117 | 2.78   | 3.19   | 3.3    | 4.11E-05 |
| 0.011 | 0.012 | 0.0117 | 2.78   | 3.19   | 3.3    | 4.11E-05 |
| 2.34  | 2.4   | 2.75   | 0.0103 | 0.0105 | 0.0109 | 4.12E-05 |
| 2.34  | 2.4   | 2.75   | 0.0103 | 0.0105 | 0.0109 | 4.12E-05 |
| 3.06  | 2.56  | 2.84   | 0.0103 | 0.0105 | 0.0109 | 4.15E-05 |
| 3.06  | 2.56  | 2.84   | 0.0103 | 0.0105 | 0.0109 | 4.15E-05 |
| 3.33  | 2.83  | 3.3    | 0.0103 | 0.0105 | 0.0109 | 4.15E-05 |
| 0.011 | 0.012 | 0.0117 | 2.48   | 2.89   | 2.92   | 4.17E-05 |
| 0.011 | 0.012 | 0.0117 | 2.48   | 2.89   | 2.92   | 4.17E-05 |
| 2.47  | 2.18  | 2.6    | 0.0103 | 0.0105 | 0.0109 | 4.18E-05 |
| 2.47  | 2.18  | 2.6    | 0.0103 | 0.0105 | 0.0109 | 4.18E-05 |
| 2.12  | 2.52  | 2.43   | 0.0103 | 0.0105 | 0.0109 | 4.19E-05 |
| 0.011 | 0.012 | 0.0117 | 2.45   | 2.89   | 2.85   | 4.20E-05 |
| 2.77  | 2.91  | 2.44   | 0.0103 | 0.0105 | 0.0109 | 4.20E-05 |
| 3.49  | 2.92  | 3.28   | 0.0103 | 0.0105 | 0.0109 | 4.21E-05 |
| 3.49  | 2.92  | 3.28   | 0.0103 | 0.0105 | 0.0109 | 4.21E-05 |
| 3.45  | 3.07  | 3.67   | 0.0103 | 0.0105 | 0.0109 | 4.23E-05 |
| 2.2   | 2.63  | 2.4    | 0.0103 | 0.0105 | 0.0109 | 4.24E-05 |
| 2.73  | 2.42  | 2.3    | 0.0103 | 0.0105 | 0.0109 | 4.25E-05 |
| 2     | 2.35  | 2.34   | 0.0103 | 0.0105 | 0.0109 | 4.25E-05 |
| 0.011 | 0.012 | 0.0117 | 3.13   | 3.6    | 3.72   | 4.26E-05 |
| 2.82  | 2.74  | 3.23   | 0.0103 | 0.0105 | 0.0109 | 4.30E-05 |
| 2.82  | 2.74  | 3.23   | 0.0103 | 0.0105 | 0.0109 | 4.30E-05 |
| 0.011 | 0.012 | 0.0117 | 2.44   | 2.61   | 2.91   | 4.31E-05 |
| 0.011 | 0.012 | 0.0117 | 2.44   | 2.61   | 2.91   | 4.31E-05 |
| 2.82  | 2.93  | 2.46   | 0.0103 | 0.0105 | 0.0109 | 4.33E-05 |
| 2.6   | 2.33  | 2.79   | 0.0103 | 0.0105 | 0.0109 | 4.33E-05 |
| 2.6   | 2.33  | 2.79   | 0.0103 | 0.0105 | 0.0109 | 4.33E-05 |
| 3.06  | 3.6   | 3.13   | 0.0103 | 0.0105 | 0.0109 | 4.35E-05 |
| 3.06  | 3.6   | 3.13   | 0.0103 | 0.0105 | 0.0109 | 4.35E-05 |
| 2.69  | 2.31  | 2.73   | 0.0103 | 0.0105 | 0.0109 | 4.36E-05 |

|       |       |        |        |        |        |          |
|-------|-------|--------|--------|--------|--------|----------|
| 2.04  | 2.43  | 2.34   | 0.0103 | 0.0105 | 0.0109 | 4.37E-05 |
| 3.71  | 3.5   | 3.1    | 0.0103 | 0.0105 | 0.0109 | 4.38E-05 |
| 3.71  | 3.5   | 3.1    | 0.0103 | 0.0105 | 0.0109 | 4.38E-05 |
| 3.41  | 2.85  | 3.09   | 0.0103 | 0.0105 | 0.0109 | 4.38E-05 |
| 3.41  | 2.85  | 3.09   | 0.0103 | 0.0105 | 0.0109 | 4.38E-05 |
| 3.41  | 2.85  | 3.09   | 0.0103 | 0.0105 | 0.0109 | 4.38E-05 |
| 2.96  | 2.47  | 2.72   | 0.0103 | 0.0105 | 0.0109 | 4.40E-05 |
| 2.59  | 2.32  | 2.17   | 0.0103 | 0.0105 | 0.0109 | 4.41E-05 |
| 2.16  | 2.15  | 2.51   | 0.0103 | 0.0105 | 0.0109 | 4.41E-05 |
| 2.09  | 2.5   | 2.26   | 0.0103 | 0.0105 | 0.0109 | 4.42E-05 |
| 2.09  | 2.5   | 2.26   | 0.0103 | 0.0105 | 0.0109 | 4.42E-05 |
| 2.63  | 2.96  | 3.15   | 0.0103 | 0.0105 | 0.0109 | 4.42E-05 |
| 2.55  | 2.57  | 2.18   | 0.0103 | 0.0105 | 0.0109 | 4.42E-05 |
| 2.55  | 2.57  | 2.18   | 0.0103 | 0.0105 | 0.0109 | 4.42E-05 |
| 2.76  | 2.33  | 2.71   | 0.0103 | 0.0105 | 0.0109 | 4.45E-05 |
| 3.34  | 2.97  | 3.56   | 0.0103 | 0.0105 | 0.0109 | 4.47E-05 |
| 3.34  | 2.97  | 3.56   | 0.0103 | 0.0105 | 0.0109 | 4.47E-05 |
| 3.34  | 2.97  | 3.56   | 0.0103 | 0.0105 | 0.0109 | 4.47E-05 |
| 3.78  | 3.21  | 3.28   | 0.0103 | 0.0105 | 0.0109 | 4.51E-05 |
| 3.78  | 3.21  | 3.28   | 0.0103 | 0.0105 | 0.0109 | 4.51E-05 |
| 0.011 | 0.012 | 0.0117 | 3.08   | 3.08   | 2.62   | 4.51E-05 |
| 0.011 | 0.012 | 0.0117 | 2.62   | 2.78   | 2.32   | 4.52E-05 |
| 0.011 | 0.012 | 0.0117 | 2.62   | 2.78   | 2.32   | 4.52E-05 |
| 2.6   | 2.63  | 3.05   | 0.0103 | 0.0105 | 0.0109 | 4.59E-05 |
| 2.6   | 2.63  | 3.05   | 0.0103 | 0.0105 | 0.0109 | 4.59E-05 |
| 0.011 | 0.012 | 0.0117 | 2.58   | 2.16   | 2.3    | 4.60E-05 |
| 2.41  | 2.39  | 2.8    | 0.0103 | 0.0105 | 0.0109 | 4.61E-05 |
| 3.98  | 4.08  | 3.43   | 0.0103 | 0.0105 | 0.0109 | 4.61E-05 |
| 3.98  | 4.08  | 3.43   | 0.0103 | 0.0105 | 0.0109 | 4.61E-05 |
| 3.98  | 4.08  | 3.43   | 0.0103 | 0.0105 | 0.0109 | 4.61E-05 |
| 3.55  | 3.51  | 3      | 0.0103 | 0.0105 | 0.0109 | 4.63E-05 |
| 3.55  | 3.51  | 3      | 0.0103 | 0.0105 | 0.0109 | 4.63E-05 |
| 0.011 | 0.012 | 0.0117 | 2.67   | 2.78   | 3.17   | 4.65E-05 |
| 2.67  | 3.17  | 3.11   | 0.0103 | 0.0105 | 0.0109 | 4.65E-05 |
| 2.26  | 2.7   | 2.6    | 0.0103 | 0.0105 | 0.0109 | 4.67E-05 |
| 3.05  | 2.67  | 2.57   | 0.0103 | 0.0105 | 0.0109 | 4.69E-05 |
| 0.011 | 0.012 | 0.0117 | 2.91   | 3.45   | 3.4    | 4.70E-05 |
| 0.011 | 0.012 | 0.0117 | 2.91   | 3.45   | 3.4    | 4.70E-05 |
| 0.011 | 0.012 | 0.0117 | 3.47   | 3.4    | 2.92   | 4.70E-05 |
| 0.011 | 0.012 | 0.0117 | 3.47   | 3.4    | 2.92   | 4.70E-05 |
| 0.011 | 0.012 | 0.0117 | 2.4    | 2.38   | 2.03   | 4.72E-05 |
| 2.13  | 2.56  | 2.34   | 0.0103 | 0.0105 | 0.0109 | 4.72E-05 |
| 0.011 | 0.012 | 0.0117 | 3.66   | 3.16   | 3.11   | 4.73E-05 |
| 3.45  | 2.98  | 2.93   | 0.0103 | 0.0105 | 0.0109 | 4.74E-05 |
| 3.45  | 2.98  | 2.93   | 0.0103 | 0.0105 | 0.0109 | 4.74E-05 |
| 3.45  | 2.98  | 2.93   | 0.0103 | 0.0105 | 0.0109 | 4.74E-05 |
| 3.4   | 3.2   | 2.83   | 0.0103 | 0.0105 | 0.0109 | 4.75E-05 |
| 3.4   | 3.2   | 2.83   | 0.0103 | 0.0105 | 0.0109 | 4.75E-05 |
| 0.011 | 0.012 | 0.0117 | 2.27   | 2.4    | 2.71   | 4.75E-05 |
| 0.011 | 0.012 | 0.0117 | 2.57   | 3.06   | 2.69   | 4.79E-05 |
| 0.011 | 0.012 | 0.0117 | 2.57   | 3.06   | 2.69   | 4.79E-05 |
| 0.011 | 0.012 | 0.0117 | 2.7    | 3.02   | 2.52   | 4.81E-05 |
| 2.64  | 2.84  | 2.36   | 0.0103 | 0.0105 | 0.0109 | 4.82E-05 |
| 2.76  | 2.78  | 2.35   | 0.0103 | 0.0105 | 0.0109 | 4.82E-05 |
| 2.76  | 2.78  | 2.35   | 0.0103 | 0.0105 | 0.0109 | 4.82E-05 |
| 0.011 | 0.012 | 0.0117 | 3.25   | 2.77   | 3.28   | 4.82E-05 |
| 2.77  | 3.2   | 2.71   | 0.0103 | 0.0105 | 0.0109 | 4.83E-05 |
| 2.77  | 3.2   | 2.71   | 0.0103 | 0.0105 | 0.0109 | 4.83E-05 |

|       |       |        |        |        |        |          |
|-------|-------|--------|--------|--------|--------|----------|
| 2.04  | 2.4   | 2.41   | 0.0103 | 0.0105 | 0.0109 | 4.84E-05 |
| 3.14  | 2.84  | 3.42   | 0.0103 | 0.0105 | 0.0109 | 4.87E-05 |
| 3.14  | 2.84  | 3.42   | 0.0103 | 0.0105 | 0.0109 | 4.87E-05 |
| 2.12  | 2.23  | 2.53   | 0.0103 | 0.0105 | 0.0109 | 4.88E-05 |
| 2.49  | 2.34  | 2.07   | 0.0103 | 0.0105 | 0.0109 | 4.89E-05 |
| 2.49  | 2.34  | 2.07   | 0.0103 | 0.0105 | 0.0109 | 4.89E-05 |
| 3.39  | 3.9   | 3.29   | 0.0103 | 0.0105 | 0.0109 | 4.90E-05 |
| 2.69  | 2.85  | 2.37   | 0.0103 | 0.0105 | 0.0109 | 4.91E-05 |
| 0.011 | 0.012 | 0.0117 | 4.61   | 3.83   | 4.18   | 4.92E-05 |
| 0.011 | 0.012 | 0.0117 | 4.61   | 3.83   | 4.18   | 4.92E-05 |
| 0.011 | 0.012 | 0.0117 | 3.23   | 2.97   | 2.68   | 4.96E-05 |
| 0.011 | 0.012 | 0.0117 | 3.23   | 2.97   | 2.68   | 4.96E-05 |
| 0.011 | 0.012 | 0.0117 | 3.23   | 2.97   | 2.68   | 4.96E-05 |
| 2.63  | 2.55  | 2.2    | 0.0103 | 0.0105 | 0.0109 | 4.97E-05 |
| 2.64  | 2.25  | 2.67   | 0.0103 | 0.0105 | 0.0109 | 4.97E-05 |
| 2.61  | 3.03  | 3.12   | 0.0103 | 0.0105 | 0.0109 | 5.01E-05 |
| 0.011 | 0.012 | 0.0117 | 2.54   | 2.57   | 2.99   | 5.02E-05 |
| 0.011 | 0.012 | 0.0117 | 2.54   | 2.57   | 2.99   | 5.02E-05 |
| 2.47  | 2.51  | 2.11   | 0.0103 | 0.0105 | 0.0109 | 5.03E-05 |
| 2.56  | 2.14  | 2.26   | 0.0103 | 0.0105 | 0.0109 | 5.03E-05 |
| 2.57  | 2.21  | 2.64   | 0.0103 | 0.0105 | 0.0109 | 5.04E-05 |
| 2.57  | 2.21  | 2.64   | 0.0103 | 0.0105 | 0.0109 | 5.04E-05 |
| 0.011 | 0.012 | 0.0117 | 2.79   | 2.32   | 2.65   | 5.04E-05 |
| 2.77  | 2.31  | 2.46   | 0.0103 | 0.0105 | 0.0109 | 5.05E-05 |
| 2.77  | 2.31  | 2.46   | 0.0103 | 0.0105 | 0.0109 | 5.05E-05 |
| 3.51  | 3.11  | 3.75   | 0.0103 | 0.0105 | 0.0109 | 5.07E-05 |
| 4.62  | 4.2   | 3.83   | 0.0103 | 0.0105 | 0.0109 | 5.10E-05 |
| 3.45  | 2.88  | 3.34   | 0.0103 | 0.0105 | 0.0109 | 5.13E-05 |
| 3.45  | 2.88  | 3.34   | 0.0103 | 0.0105 | 0.0109 | 5.13E-05 |
| 2.26  | 2.7   | 2.37   | 0.0103 | 0.0105 | 0.0109 | 5.13E-05 |
| 2.63  | 2.19  | 2.34   | 0.0103 | 0.0105 | 0.0109 | 5.13E-05 |
| 0.011 | 0.012 | 0.0117 | 2.87   | 3.15   | 2.61   | 5.16E-05 |
| 3.44  | 2.93  | 2.94   | 0.0103 | 0.0105 | 0.0109 | 5.17E-05 |
| 4.21  | 4.77  | 5.08   | 0.0103 | 0.0105 | 0.0109 | 5.17E-05 |
| 0.011 | 0.012 | 0.0117 | 2.59   | 2.23   | 2.67   | 5.17E-05 |
| 3.07  | 3.03  | 2.58   | 0.0103 | 0.0105 | 0.0109 | 5.19E-05 |
| 2.59  | 2.79  | 2.31   | 0.0103 | 0.0105 | 0.0109 | 5.20E-05 |
| 2.59  | 2.79  | 2.31   | 0.0103 | 0.0105 | 0.0109 | 5.20E-05 |
| 2.22  | 2.46  | 2.04   | 0.0103 | 0.0105 | 0.0109 | 5.22E-05 |
| 4.06  | 4.5   | 3.73   | 0.0103 | 0.0105 | 0.0109 | 5.22E-05 |
| 4.06  | 4.5   | 3.73   | 0.0103 | 0.0105 | 0.0109 | 5.22E-05 |
| 3.19  | 2.65  | 2.85   | 0.0103 | 0.0105 | 0.0109 | 5.23E-05 |
| 3.19  | 2.65  | 2.85   | 0.0103 | 0.0105 | 0.0109 | 5.23E-05 |
| 3.02  | 2.74  | 3.31   | 0.0103 | 0.0105 | 0.0109 | 5.24E-05 |
| 0.011 | 0.012 | 0.0117 | 2.69   | 2.65   | 3.13   | 5.26E-05 |
| 0.011 | 0.012 | 0.0117 | 2.69   | 2.65   | 3.13   | 5.26E-05 |
| 2.58  | 3.12  | 2.87   | 0.0103 | 0.0105 | 0.0109 | 5.31E-05 |
| 2.58  | 3.12  | 2.87   | 0.0103 | 0.0105 | 0.0109 | 5.31E-05 |
| 2.53  | 3.06  | 2.81   | 0.0103 | 0.0105 | 0.0109 | 5.33E-05 |
| 2.53  | 3.06  | 2.81   | 0.0103 | 0.0105 | 0.0109 | 5.33E-05 |
| 2.82  | 2.42  | 2.9    | 0.0103 | 0.0105 | 0.0109 | 5.36E-05 |
| 2.82  | 2.42  | 2.9    | 0.0103 | 0.0105 | 0.0109 | 5.36E-05 |
| 0.011 | 0.012 | 0.0117 | 2.29   | 2.77   | 2.56   | 5.36E-05 |
| 2.54  | 2.11  | 2.26   | 0.0103 | 0.0105 | 0.0109 | 5.37E-05 |
| 0.011 | 0.012 | 0.0117 | 2.3    | 2.38   | 2.74   | 5.37E-05 |
| 0.011 | 0.012 | 0.0117 | 3.32   | 2.78   | 3.26   | 5.37E-05 |
| 0.011 | 0.012 | 0.0117 | 3.32   | 2.78   | 3.26   | 5.37E-05 |
| 0.011 | 0.012 | 0.0117 | 3.32   | 2.78   | 3.26   | 5.37E-05 |



|       |       |        |        |        |        |          |
|-------|-------|--------|--------|--------|--------|----------|
| 5.29  | 4.38  | 4.76   | 0.0103 | 0.0105 | 0.0109 | 5.37E-05 |
| 0.011 | 0.012 | 0.0117 | 2.71   | 2.51   | 2.24   | 5.39E-05 |
| 2.24  | 2.48  | 2.71   | 0.0103 | 0.0105 | 0.0109 | 5.39E-05 |
| 3.37  | 4     | 3.45   | 0.0103 | 0.0105 | 0.0109 | 5.41E-05 |
| 3.37  | 4     | 3.45   | 0.0103 | 0.0105 | 0.0109 | 5.41E-05 |
| 3.37  | 4     | 3.45   | 0.0103 | 0.0105 | 0.0109 | 5.41E-05 |
| 0.011 | 0.012 | 0.0117 | 2.32   | 2.51   | 2.8    | 5.43E-05 |
| 2.37  | 2.45  | 2.04   | 0.0103 | 0.0105 | 0.0109 | 5.43E-05 |
| 2.84  | 2.47  | 2.38   | 0.0103 | 0.0105 | 0.0109 | 5.43E-05 |
| 2.84  | 2.47  | 2.38   | 0.0103 | 0.0105 | 0.0109 | 5.43E-05 |
| 0.011 | 0.012 | 0.0117 | 3.08   | 3.52   | 2.94   | 5.44E-05 |
| 2.81  | 3.38  | 2.99   | 0.0103 | 0.0105 | 0.0109 | 5.45E-05 |
| 2.81  | 3.38  | 2.99   | 0.0103 | 0.0105 | 0.0109 | 5.45E-05 |
| 3.1   | 3.63  | 3.08   | 0.0103 | 0.0105 | 0.0109 | 5.48E-05 |
| 3.29  | 3.8   | 3.19   | 0.0103 | 0.0105 | 0.0109 | 5.50E-05 |
| 2.13  | 2.58  | 2.37   | 0.0103 | 0.0105 | 0.0109 | 5.51E-05 |
| 2.4   | 2.8   | 2.88   | 0.0103 | 0.0105 | 0.0109 | 5.52E-05 |
| 2.4   | 2.8   | 2.88   | 0.0103 | 0.0105 | 0.0109 | 5.52E-05 |
| 2.4   | 2.8   | 2.88   | 0.0103 | 0.0105 | 0.0109 | 5.52E-05 |
| 2.4   | 2.8   | 2.88   | 0.0103 | 0.0105 | 0.0109 | 5.52E-05 |
| 4.09  | 3.49  | 4.18   | 0.0103 | 0.0105 | 0.0109 | 5.54E-05 |
| 4.09  | 3.49  | 4.18   | 0.0103 | 0.0105 | 0.0109 | 5.54E-05 |
| 4.09  | 3.49  | 4.18   | 0.0103 | 0.0105 | 0.0109 | 5.54E-05 |
| 2.56  | 2.58  | 3.02   | 0.0103 | 0.0105 | 0.0109 | 5.54E-05 |
| 2.56  | 2.58  | 3.02   | 0.0103 | 0.0105 | 0.0109 | 5.54E-05 |
| 0.011 | 0.012 | 0.0117 | 3.35   | 4.01   | 3.93   | 5.55E-05 |
| 0.011 | 0.012 | 0.0117 | 3.35   | 4.01   | 3.93   | 5.55E-05 |
| 2.41  | 2.01  | 2.11   | 0.0103 | 0.0105 | 0.0109 | 5.57E-05 |
| 2.41  | 2.01  | 2.11   | 0.0103 | 0.0105 | 0.0109 | 5.57E-05 |
| 4.12  | 3.75  | 3.4    | 0.0103 | 0.0105 | 0.0109 | 5.57E-05 |
| 2.42  | 2.55  | 2.11   | 0.0103 | 0.0105 | 0.0109 | 5.60E-05 |
| 3.14  | 2.67  | 2.67   | 0.0103 | 0.0105 | 0.0109 | 5.63E-05 |
| 3.82  | 3.98  | 3.3    | 0.0103 | 0.0105 | 0.0109 | 5.63E-05 |
| 3.82  | 3.98  | 3.3    | 0.0103 | 0.0105 | 0.0109 | 5.63E-05 |
| 3.82  | 3.98  | 3.3    | 0.0103 | 0.0105 | 0.0109 | 5.63E-05 |
| 0.011 | 0.012 | 0.0117 | 2.77   | 3.36   | 3.09   | 5.66E-05 |
| 2.85  | 2.35  | 2.6    | 0.0103 | 0.0105 | 0.0109 | 5.67E-05 |
| 0.011 | 0.012 | 0.0117 | 3.77   | 4.23   | 3.5    | 5.68E-05 |
| 0.011 | 0.012 | 0.0117 | 2.76   | 3.18   | 2.66   | 5.70E-05 |
| 0.011 | 0.012 | 0.0117 | 2.76   | 3.18   | 2.66   | 5.70E-05 |
| 0.011 | 0.012 | 0.0117 | 2.76   | 3.18   | 2.66   | 5.70E-05 |
| 3.19  | 2.67  | 3.15   | 0.0103 | 0.0105 | 0.0109 | 5.71E-05 |
| 3.19  | 2.67  | 3.15   | 0.0103 | 0.0105 | 0.0109 | 5.71E-05 |
| 2.23  | 2.55  | 2.7    | 0.0103 | 0.0105 | 0.0109 | 5.71E-05 |
| 2.41  | 2.07  | 2.03   | 0.0103 | 0.0105 | 0.0109 | 5.71E-05 |
| 0.011 | 0.012 | 0.0117 | 2.75   | 3.23   | 2.74   | 5.72E-05 |
| 0.011 | 0.012 | 0.0117 | 3.13   | 2.69   | 3.24   | 5.72E-05 |
| 2.65  | 2.2   | 2.56   | 0.0103 | 0.0105 | 0.0109 | 5.74E-05 |
| 2.65  | 2.2   | 2.56   | 0.0103 | 0.0105 | 0.0109 | 5.74E-05 |
| 0.011 | 0.012 | 0.0117 | 2.53   | 3.07   | 2.8    | 5.74E-05 |
| 2.55  | 2.27  | 2.11   | 0.0103 | 0.0105 | 0.0109 | 5.75E-05 |
| 0.011 | 0.012 | 0.0117 | 2.18   | 2.37   | 2.64   | 5.76E-05 |
| 0.011 | 0.012 | 0.0117 | 2.18   | 2.37   | 2.64   | 5.76E-05 |
| 0.011 | 0.012 | 0.0117 | 2.1    | 2.55   | 2.35   | 5.81E-05 |
| 3.34  | 3.47  | 3.39   | 2.26   | 2.14   | 2.32   | 5.82E-05 |
| 3.34  | 3.47  | 3.39   | 2.26   | 2.14   | 2.32   | 5.82E-05 |
| 0.011 | 0.012 | 0.0117 | 3.36   | 4      | 3.44   | 5.82E-05 |
| 0.011 | 0.012 | 0.0117 | 2.25   | 2.38   | 2.71   | 5.87E-05 |

|       |       |        |        |        |        |          |
|-------|-------|--------|--------|--------|--------|----------|
| 2.67  | 2.88  | 2.37   | 0.0103 | 0.0105 | 0.0109 | 5.89E-05 |
| 2.93  | 3.56  | 3.32   | 0.0103 | 0.0105 | 0.0109 | 5.91E-05 |
| 0.011 | 0.012 | 0.0117 | 3.03   | 3.06   | 2.56   | 5.93E-05 |
| 2.98  | 3.14  | 2.59   | 0.0103 | 0.0105 | 0.0109 | 5.97E-05 |
| 4.62  | 3.96  | 4.78   | 0.0103 | 0.0105 | 0.0109 | 5.98E-05 |
| 2.34  | 2.8   | 2.42   | 0.0103 | 0.0105 | 0.0109 | 6.00E-05 |
| 2.34  | 2.8   | 2.42   | 0.0103 | 0.0105 | 0.0109 | 6.00E-05 |
| 2.34  | 2.8   | 2.42   | 0.0103 | 0.0105 | 0.0109 | 6.00E-05 |
| 4.21  | 4.41  | 3.64   | 0.0103 | 0.0105 | 0.0109 | 6.03E-05 |
| 2.78  | 3.06  | 3.38   | 0.0103 | 0.0105 | 0.0109 | 6.03E-05 |
| 3.23  | 2.68  | 3.14   | 0.0103 | 0.0105 | 0.0109 | 6.05E-05 |
| 2.68  | 3.07  | 2.55   | 0.0103 | 0.0105 | 0.0109 | 6.07E-05 |
| 2.68  | 3.07  | 2.55   | 0.0103 | 0.0105 | 0.0109 | 6.07E-05 |
| 2.4   | 2.77  | 2.31   | 0.0103 | 0.0105 | 0.0109 | 6.07E-05 |
| 2.06  | 2.47  | 2.14   | 0.0103 | 0.0105 | 0.0109 | 6.07E-05 |
| 4.65  | 4.46  | 3.84   | 0.0103 | 0.0105 | 0.0109 | 6.11E-05 |
| 4.65  | 4.46  | 3.84   | 0.0103 | 0.0105 | 0.0109 | 6.11E-05 |
| 2.94  | 2.46  | 2.53   | 0.0103 | 0.0105 | 0.0109 | 6.14E-05 |
| 5     | 4.19  | 4.29   | 0.0103 | 0.0105 | 0.0109 | 6.15E-05 |
| 2.42  | 2.11  | 2.01   | 0.0103 | 0.0105 | 0.0109 | 6.15E-05 |
| 2.42  | 2.11  | 2.01   | 0.0103 | 0.0105 | 0.0109 | 6.15E-05 |
| 3.28  | 2.93  | 2.7    | 0.0103 | 0.0105 | 0.0109 | 6.19E-05 |
| 2.88  | 3.08  | 2.53   | 0.0103 | 0.0105 | 0.0109 | 6.20E-05 |
| 2.88  | 3.08  | 2.53   | 0.0103 | 0.0105 | 0.0109 | 6.20E-05 |
| 2.88  | 3.08  | 2.53   | 0.0103 | 0.0105 | 0.0109 | 6.20E-05 |
| 2.51  | 2.06  | 2.3    | 0.0103 | 0.0105 | 0.0109 | 6.21E-05 |
| 2.51  | 2.06  | 2.3    | 0.0103 | 0.0105 | 0.0109 | 6.21E-05 |
| 0.011 | 0.012 | 0.0117 | 2.86   | 2.53   | 2.36   | 6.23E-05 |
| 2.84  | 2.6   | 2.33   | 0.0103 | 0.0105 | 0.0109 | 6.25E-05 |
| 2.84  | 2.6   | 2.33   | 0.0103 | 0.0105 | 0.0109 | 6.25E-05 |
| 0.011 | 0.012 | 0.0117 | 2.45   | 2.48   | 2.91   | 6.25E-05 |
| 3.84  | 3.5   | 3.15   | 0.0103 | 0.0105 | 0.0109 | 6.26E-05 |
| 3.26  | 3.73  | 3.09   | 0.0103 | 0.0105 | 0.0109 | 6.26E-05 |
| 0.011 | 0.012 | 0.0117 | 3.26   | 2.83   | 2.71   | 6.26E-05 |
| 0.011 | 0.012 | 0.0117 | 3.26   | 2.83   | 2.71   | 6.26E-05 |
| 3.17  | 3.06  | 2.62   | 0.0103 | 0.0105 | 0.0109 | 6.27E-05 |
| 2.48  | 2.13  | 2.58   | 0.0103 | 0.0105 | 0.0109 | 6.27E-05 |
| 2.48  | 2.13  | 2.58   | 0.0103 | 0.0105 | 0.0109 | 6.27E-05 |
| 3.14  | 3.18  | 2.65   | 0.0103 | 0.0105 | 0.0109 | 6.28E-05 |
| 3.14  | 3.18  | 2.65   | 0.0103 | 0.0105 | 0.0109 | 6.28E-05 |
| 3.39  | 2.78  | 3.1    | 0.0103 | 0.0105 | 0.0109 | 6.29E-05 |
| 0.011 | 0.012 | 0.0117 | 2.29   | 2.68   | 2.77   | 6.35E-05 |
| 4.11  | 3.78  | 4.6    | 0.0103 | 0.0105 | 0.0109 | 6.36E-05 |
| 2.37  | 2.89  | 2.69   | 0.0103 | 0.0105 | 0.0109 | 6.36E-05 |
| 2.37  | 2.89  | 2.69   | 0.0103 | 0.0105 | 0.0109 | 6.36E-05 |
| 3.34  | 3.39  | 2.82   | 0.0103 | 0.0105 | 0.0109 | 6.39E-05 |
| 3.34  | 3.39  | 2.82   | 0.0103 | 0.0105 | 0.0109 | 6.39E-05 |
| 3.72  | 3.11  | 3.19   | 0.0103 | 0.0105 | 0.0109 | 6.41E-05 |
| 3.72  | 3.11  | 3.19   | 0.0103 | 0.0105 | 0.0109 | 6.41E-05 |
| 3.16  | 3.17  | 2.65   | 0.0103 | 0.0105 | 0.0109 | 6.44E-05 |
| 3.48  | 4.11  | 3.47   | 0.0103 | 0.0105 | 0.0109 | 6.45E-05 |
| 3.48  | 4.11  | 3.47   | 0.0103 | 0.0105 | 0.0109 | 6.45E-05 |
| 2.5   | 2.07  | 2.18   | 0.0103 | 0.0105 | 0.0109 | 6.46E-05 |
| 2.36  | 2.27  | 2.73   | 0.0103 | 0.0105 | 0.0109 | 6.47E-05 |
| 2.36  | 2.27  | 2.73   | 0.0103 | 0.0105 | 0.0109 | 6.47E-05 |
| 3.21  | 3.3   | 2.73   | 0.0103 | 0.0105 | 0.0109 | 6.48E-05 |
| 3.81  | 3.53  | 3.12   | 0.0103 | 0.0105 | 0.0109 | 6.48E-05 |
| 2.96  | 2.66  | 3.25   | 0.0103 | 0.0105 | 0.0109 | 6.56E-05 |

|       |       |        |        |        |        |          |
|-------|-------|--------|--------|--------|--------|----------|
| 3.23  | 3.2   | 2.69   | 0.0103 | 0.0105 | 0.0109 | 6.57E-05 |
| 3.23  | 3.2   | 2.69   | 0.0103 | 0.0105 | 0.0109 | 6.57E-05 |
| 3.19  | 2.61  | 2.92   | 0.0103 | 0.0105 | 0.0109 | 6.58E-05 |
| 3.19  | 2.61  | 2.92   | 0.0103 | 0.0105 | 0.0109 | 6.58E-05 |
| 2.57  | 2.15  | 2.57   | 0.0103 | 0.0105 | 0.0109 | 6.58E-05 |
| 2.57  | 2.15  | 2.57   | 0.0103 | 0.0105 | 0.0109 | 6.58E-05 |
| 2.91  | 2.81  | 2.4    | 0.0103 | 0.0105 | 0.0109 | 6.58E-05 |
| 4.3   | 3.53  | 4.09   | 0.0103 | 0.0105 | 0.0109 | 6.64E-05 |
| 4.3   | 3.53  | 4.09   | 0.0103 | 0.0105 | 0.0109 | 6.64E-05 |
| 4.3   | 3.53  | 4.09   | 0.0103 | 0.0105 | 0.0109 | 6.64E-05 |
| 2.24  | 2.73  | 2.59   | 0.0103 | 0.0105 | 0.0109 | 6.67E-05 |
| 2.24  | 2.73  | 2.59   | 0.0103 | 0.0105 | 0.0109 | 6.67E-05 |
| 2.24  | 2.73  | 2.59   | 0.0103 | 0.0105 | 0.0109 | 6.67E-05 |
| 2.24  | 2.73  | 2.59   | 0.0103 | 0.0105 | 0.0109 | 6.67E-05 |
| 2.56  | 3.13  | 2.91   | 0.0103 | 0.0105 | 0.0109 | 6.69E-05 |
| 3.76  | 3.23  | 3.13   | 0.0103 | 0.0105 | 0.0109 | 6.70E-05 |
| 3.76  | 3.23  | 3.13   | 0.0103 | 0.0105 | 0.0109 | 6.70E-05 |
| 3.02  | 2.48  | 2.88   | 0.0103 | 0.0105 | 0.0109 | 6.70E-05 |
| 3.26  | 2.87  | 3.51   | 0.0103 | 0.0105 | 0.0109 | 6.71E-05 |
| 3.17  | 2.82  | 2.6    | 0.0103 | 0.0105 | 0.0109 | 6.72E-05 |
| 3.17  | 2.82  | 2.6    | 0.0103 | 0.0105 | 0.0109 | 6.72E-05 |
| 3.17  | 2.82  | 2.6    | 0.0103 | 0.0105 | 0.0109 | 6.72E-05 |
| 3.02  | 2.75  | 3.36   | 0.0103 | 0.0105 | 0.0109 | 6.73E-05 |
| 0.011 | 0.012 | 0.0117 | 3.17   | 2.78   | 3.4    | 6.77E-05 |
| 0.011 | 0.012 | 0.0117 | 3.17   | 2.78   | 3.4    | 6.77E-05 |
| 0.011 | 0.012 | 0.0117 | 2.93   | 3.43   | 3.56   | 6.77E-05 |
| 0.011 | 0.012 | 0.0117 | 2.93   | 3.43   | 3.56   | 6.77E-05 |
| 2.42  | 2.04  | 2.46   | 0.0103 | 0.0105 | 0.0109 | 6.77E-05 |
| 2.81  | 3.06  | 3.43   | 0.0103 | 0.0105 | 0.0109 | 6.77E-05 |
| 2.4   | 2.77  | 2.93   | 0.0103 | 0.0105 | 0.0109 | 6.80E-05 |
| 2.4   | 2.77  | 2.93   | 0.0103 | 0.0105 | 0.0109 | 6.80E-05 |
| 3.4   | 3.35  | 2.82   | 0.0103 | 0.0105 | 0.0109 | 6.81E-05 |
| 3.4   | 3.35  | 2.82   | 0.0103 | 0.0105 | 0.0109 | 6.81E-05 |
| 3.6   | 3.32  | 2.94   | 0.0103 | 0.0105 | 0.0109 | 6.81E-05 |
| 3.6   | 3.32  | 2.94   | 0.0103 | 0.0105 | 0.0109 | 6.81E-05 |
| 2.25  | 2.74  | 2.42   | 0.0103 | 0.0105 | 0.0109 | 6.83E-05 |
| 2.94  | 3.59  | 3.2    | 0.0103 | 0.0105 | 0.0109 | 6.84E-05 |
| 2.78  | 2.91  | 3.36   | 0.0103 | 0.0105 | 0.0109 | 6.85E-05 |
| 2.26  | 2.68  | 2.73   | 0.0103 | 0.0105 | 0.0109 | 6.89E-05 |
| 2.74  | 2.77  | 2.3    | 0.0103 | 0.0105 | 0.0109 | 6.91E-05 |
| 2.74  | 2.77  | 2.3    | 0.0103 | 0.0105 | 0.0109 | 6.91E-05 |
| 2.6   | 2.17  | 2.6    | 0.0103 | 0.0105 | 0.0109 | 6.91E-05 |
| 2.6   | 2.17  | 2.6    | 0.0103 | 0.0105 | 0.0109 | 6.91E-05 |
| 0.011 | 0.012 | 0.0117 | 3.04   | 2.54   | 2.59   | 6.93E-05 |
| 2.86  | 2.35  | 2.75   | 0.0103 | 0.0105 | 0.0109 | 6.93E-05 |
| 2.86  | 2.35  | 2.75   | 0.0103 | 0.0105 | 0.0109 | 6.93E-05 |
| 3.14  | 3.07  | 3.68   | 0.0103 | 0.0105 | 0.0109 | 6.94E-05 |
| 3.14  | 3.07  | 3.68   | 0.0103 | 0.0105 | 0.0109 | 6.94E-05 |
| 4.17  | 3.52  | 3.51   | 0.0103 | 0.0105 | 0.0109 | 6.94E-05 |
| 4.17  | 3.52  | 3.51   | 0.0103 | 0.0105 | 0.0109 | 6.94E-05 |
| 3.83  | 4.35  | 3.57   | 0.0103 | 0.0105 | 0.0109 | 6.96E-05 |
| 3.83  | 4.35  | 3.57   | 0.0103 | 0.0105 | 0.0109 | 6.96E-05 |
| 2.99  | 3.62  | 3.54   | 0.0103 | 0.0105 | 0.0109 | 6.97E-05 |
| 2.99  | 3.62  | 3.54   | 0.0103 | 0.0105 | 0.0109 | 6.97E-05 |
| 3.63  | 3.04  | 3.08   | 0.0103 | 0.0105 | 0.0109 | 6.99E-05 |
| 3.63  | 3.04  | 3.08   | 0.0103 | 0.0105 | 0.0109 | 6.99E-05 |
| 3.7   | 3.15  | 3.09   | 0.0103 | 0.0105 | 0.0109 | 7.00E-05 |
| 3.7   | 3.15  | 3.09   | 0.0103 | 0.0105 | 0.0109 | 7.00E-05 |

|       |       |        |        |        |        |          |
|-------|-------|--------|--------|--------|--------|----------|
| 3.7   | 3.15  | 3.09   | 0.0103 | 0.0105 | 0.0109 | 7.00E-05 |
| 2.73  | 2.56  | 2.23   | 0.0103 | 0.0105 | 0.0109 | 7.01E-05 |
| 2.73  | 2.56  | 2.23   | 0.0103 | 0.0105 | 0.0109 | 7.01E-05 |
| 2.48  | 2.82  | 3.04   | 0.0103 | 0.0105 | 0.0109 | 7.02E-05 |
| 0.011 | 0.012 | 0.0117 | 2.93   | 2.52   | 2.43   | 7.03E-05 |
| 0.011 | 0.012 | 0.0117 | 3.03   | 2.48   | 2.69   | 7.05E-05 |
| 2.37  | 2.79  | 2.88   | 0.0103 | 0.0105 | 0.0109 | 7.05E-05 |
| 3.23  | 2.67  | 3.17   | 0.0103 | 0.0105 | 0.0109 | 7.07E-05 |
| 3.74  | 4.21  | 4.59   | 0.0103 | 0.0105 | 0.0109 | 7.09E-05 |
| 0.011 | 0.012 | 0.0117 | 2.65   | 2.16   | 2.43   | 7.10E-05 |
| 2.58  | 2.15  | 2.2    | 0.0103 | 0.0105 | 0.0109 | 7.13E-05 |
| 2.97  | 2.73  | 3.34   | 0.0103 | 0.0105 | 0.0109 | 7.15E-05 |
| 0.011 | 0.012 | 0.0117 | 2.88   | 3.53   | 3.31   | 7.16E-05 |
| 0.011 | 0.012 | 0.0117 | 2.88   | 3.53   | 3.31   | 7.16E-05 |
| 2.71  | 2.21  | 2.44   | 0.0103 | 0.0105 | 0.0109 | 7.18E-05 |
| 2.45  | 2.09  | 2.04   | 0.0103 | 0.0105 | 0.0109 | 7.18E-05 |
| 3     | 2.59  | 3.17   | 0.0103 | 0.0105 | 0.0109 | 7.18E-05 |
| 3     | 2.59  | 3.17   | 0.0103 | 0.0105 | 0.0109 | 7.18E-05 |
| 0.011 | 0.012 | 0.0117 | 2.01   | 2.44   | 2.12   | 7.20E-05 |
| 0.011 | 0.012 | 0.0117 | 3.51   | 4.21   | 3.58   | 7.24E-05 |
| 0.011 | 0.012 | 0.0117 | 3.51   | 4.21   | 3.58   | 7.24E-05 |
| 0.011 | 0.012 | 0.0117 | 2.66   | 2.83   | 3.24   | 7.29E-05 |
| 2.745 | 2.74  | 3.26   | 0.0103 | 0.0105 | 0.0109 | 7.29E-05 |
| 3.22  | 2.97  | 2.62   | 0.0103 | 0.0105 | 0.0109 | 7.33E-05 |
| 3.39  | 2.78  | 3.27   | 0.0103 | 0.0105 | 0.0109 | 7.34E-05 |
| 2.31  | 2.81  | 2.73   | 0.0103 | 0.0105 | 0.0109 | 7.35E-05 |
| 4.77  | 4.04  | 4.92   | 0.0103 | 0.0105 | 0.0109 | 7.36E-05 |
| 4.77  | 4.04  | 4.92   | 0.0103 | 0.0105 | 0.0109 | 7.36E-05 |
| 2.39  | 2.77  | 2.93   | 0.0103 | 0.0105 | 0.0109 | 7.40E-05 |
| 2.94  | 2.9   | 2.43   | 0.0103 | 0.0105 | 0.0109 | 7.41E-05 |
| 0.011 | 0.012 | 0.0117 | 2.96   | 2.45   | 2.93   | 7.44E-05 |
| 0.011 | 0.012 | 0.0117 | 2.71   | 3.09   | 2.53   | 7.44E-05 |
| 0.011 | 0.012 | 0.0117 | 2.71   | 3.09   | 2.53   | 7.44E-05 |
| 2.78  | 2.56  | 2.26   | 0.0103 | 0.0105 | 0.0109 | 7.46E-05 |
| 2.84  | 3.04  | 3.47   | 0.0103 | 0.0105 | 0.0109 | 7.51E-05 |
| 2.84  | 3.04  | 3.47   | 0.0103 | 0.0105 | 0.0109 | 7.51E-05 |
| 3.85  | 3.8   | 3.18   | 0.0103 | 0.0105 | 0.0109 | 7.53E-05 |
| 3.09  | 3.54  | 2.9    | 0.0103 | 0.0105 | 0.0109 | 7.56E-05 |
| 3.09  | 3.54  | 2.9    | 0.0103 | 0.0105 | 0.0109 | 7.56E-05 |
| 2.66  | 3.2   | 2.72   | 0.0103 | 0.0105 | 0.0109 | 7.58E-05 |
| 2.66  | 3.2   | 2.72   | 0.0103 | 0.0105 | 0.0109 | 7.58E-05 |
| 2.66  | 3.2   | 2.72   | 0.0103 | 0.0105 | 0.0109 | 7.58E-05 |
| 2.13  | 2.49  | 2.06   | 0.0103 | 0.0105 | 0.0109 | 7.65E-05 |
| 0.011 | 0.012 | 0.0117 | 3.47   | 2.84   | 3.03   | 7.67E-05 |
| 0.011 | 0.012 | 0.0117 | 2.96   | 2.48   | 2.49   | 7.68E-05 |
| 2.97  | 2.44  | 2.9    | 0.0103 | 0.0105 | 0.0109 | 7.71E-05 |
| 4.21  | 4.33  | 3.55   | 0.0103 | 0.0105 | 0.0109 | 7.76E-05 |
| 4.21  | 4.33  | 3.55   | 0.0103 | 0.0105 | 0.0109 | 7.76E-05 |
| 3.45  | 3.05  | 2.81   | 0.0103 | 0.0105 | 0.0109 | 7.77E-05 |
| 3.45  | 3.05  | 2.81   | 0.0103 | 0.0105 | 0.0109 | 7.77E-05 |
| 2.67  | 2.34  | 2.18   | 0.0103 | 0.0105 | 0.0109 | 7.82E-05 |
| 2.67  | 2.34  | 2.18   | 0.0103 | 0.0105 | 0.0109 | 7.82E-05 |
| 0.011 | 0.012 | 0.0117 | 2.38   | 2.75   | 2.93   | 7.86E-05 |
| 0.011 | 0.012 | 0.0117 | 2.38   | 2.75   | 2.93   | 7.86E-05 |
| 3.51  | 4.25  | 3.63   | 0.0103 | 0.0105 | 0.0109 | 7.88E-05 |
| 2.95  | 2.96  | 2.45   | 0.0103 | 0.0105 | 0.0109 | 7.92E-05 |
| 2.95  | 2.96  | 2.45   | 0.0103 | 0.0105 | 0.0109 | 7.92E-05 |
| 0.011 | 0.012 | 0.0117 | 3.65   | 4.09   | 3.32   | 7.94E-05 |

|       |       |        |        |        |        |          |
|-------|-------|--------|--------|--------|--------|----------|
| 2.25  | 2.26  | 2.69   | 0.0103 | 0.0105 | 0.0109 | 7.95E-05 |
| 2.25  | 2.26  | 2.69   | 0.0103 | 0.0105 | 0.0109 | 7.95E-05 |
| 4.01  | 3.35  | 4.07   | 0.0103 | 0.0105 | 0.0109 | 7.95E-05 |
| 0.011 | 0.012 | 0.0117 | 3.58   | 3.17   | 2.91   | 7.99E-05 |
| 3.03  | 2.57  | 3.15   | 0.0103 | 0.0105 | 0.0109 | 8.01E-05 |
| 2.96  | 3.46  | 3.64   | 0.0103 | 0.0105 | 0.0109 | 8.03E-05 |
| 2.96  | 3.46  | 3.64   | 0.0103 | 0.0105 | 0.0109 | 8.03E-05 |
| 2.41  | 2.8   | 2.3    | 0.0103 | 0.0105 | 0.0109 | 8.03E-05 |
| 2.27  | 2.76  | 2.37   | 0.0103 | 0.0105 | 0.0109 | 8.03E-05 |
| 2.45  | 2.84  | 2.33   | 0.0103 | 0.0105 | 0.0109 | 8.03E-05 |
| 2.69  | 3.25  | 2.76   | 0.0103 | 0.0105 | 0.0109 | 8.09E-05 |
| 2.69  | 3.25  | 2.76   | 0.0103 | 0.0105 | 0.0109 | 8.09E-05 |
| 3.54  | 2.95  | 2.98   | 0.0103 | 0.0105 | 0.0109 | 8.10E-05 |
| 3.54  | 2.95  | 2.98   | 0.0103 | 0.0105 | 0.0109 | 8.10E-05 |
| 3.8   | 3.08  | 3.56   | 0.0103 | 0.0105 | 0.0109 | 8.11E-05 |
| 2.46  | 3.04  | 2.77   | 0.0103 | 0.0105 | 0.0109 | 8.12E-05 |
| 3.63  | 3.78  | 3.08   | 0.0103 | 0.0105 | 0.0109 | 8.13E-05 |
| 3.63  | 3.78  | 3.08   | 0.0103 | 0.0105 | 0.0109 | 8.13E-05 |
| 2.46  | 2.99  | 2.56   | 0.0103 | 0.0105 | 0.0109 | 8.18E-05 |
| 0.011 | 0.012 | 0.0117 | 2.86   | 2.54   | 3.14   | 8.18E-05 |
| 0.011 | 0.012 | 0.0117 | 2.86   | 2.54   | 3.14   | 8.18E-05 |
| 2.52  | 2.98  | 3.09   | 0.0103 | 0.0105 | 0.0109 | 8.21E-05 |
| 0.011 | 0.012 | 0.0117 | 3.1    | 3.5    | 2.84   | 8.22E-05 |
| 0.011 | 0.012 | 0.0117 | 3.1    | 3.5    | 2.84   | 8.22E-05 |
| 3.5   | 2.83  | 3.22   | 0.0103 | 0.0105 | 0.0109 | 8.23E-05 |
| 2.52  | 2.48  | 2.07   | 0.0103 | 0.0105 | 0.0109 | 8.26E-05 |
| 2.52  | 2.48  | 2.07   | 0.0103 | 0.0105 | 0.0109 | 8.26E-05 |
| 2.08  | 2.04  | 2.46   | 0.0103 | 0.0105 | 0.0109 | 8.27E-05 |
| 2.58  | 3.08  | 3.15   | 0.0103 | 0.0105 | 0.0109 | 8.28E-05 |
| 4.13  | 3.84  | 3.34   | 0.0103 | 0.0105 | 0.0109 | 8.30E-05 |
| 2.6   | 3.21  | 2.86   | 0.0103 | 0.0105 | 0.0109 | 8.30E-05 |
| 2.6   | 3.21  | 2.86   | 0.0103 | 0.0105 | 0.0109 | 8.30E-05 |
| 3.22  | 2.97  | 3.66   | 0.0103 | 0.0105 | 0.0109 | 8.44E-05 |
| 3.22  | 2.97  | 3.66   | 0.0103 | 0.0105 | 0.0109 | 8.44E-05 |
| 3.22  | 2.97  | 3.66   | 0.0103 | 0.0105 | 0.0109 | 8.44E-05 |
| 3.22  | 2.97  | 3.66   | 0.0103 | 0.0105 | 0.0109 | 8.44E-05 |
| 3.22  | 2.97  | 3.66   | 0.0103 | 0.0105 | 0.0109 | 8.44E-05 |
| 2.7   | 2.46  | 2.18   | 0.0103 | 0.0105 | 0.0109 | 8.47E-05 |
| 2.9   | 2.48  | 3.06   | 0.0103 | 0.0105 | 0.0109 | 8.48E-05 |
| 0.011 | 0.012 | 0.0117 | 3.9    | 3.32   | 3.21   | 8.52E-05 |
| 0.011 | 0.012 | 0.0117 | 3.9    | 3.32   | 3.21   | 8.52E-05 |
| 0.011 | 0.012 | 0.0117 | 2.61   | 2.77   | 3.2    | 8.56E-05 |
| 0.011 | 0.012 | 0.0117 | 2.61   | 2.77   | 3.2    | 8.56E-05 |
| 2.92  | 2.42  | 2.94   | 0.0103 | 0.0105 | 0.0109 | 8.57E-05 |
| 2.26  | 2.14  | 2.62   | 0.0103 | 0.0105 | 0.0109 | 8.60E-05 |
| 2.75  | 2.23  | 2.62   | 0.0103 | 0.0105 | 0.0109 | 8.61E-05 |
| 2.3   | 2.17  | 2.66   | 0.0103 | 0.0105 | 0.0109 | 8.61E-05 |
| 2.3   | 2.17  | 2.66   | 0.0103 | 0.0105 | 0.0109 | 8.61E-05 |
| 2.74  | 2.5   | 2.21   | 0.0103 | 0.0105 | 0.0109 | 8.62E-05 |
| 0.011 | 0.012 | 0.0117 | 2.97   | 3.37   | 2.73   | 8.63E-05 |
| 2.27  | 2.48  | 2      | 0.0103 | 0.0105 | 0.0109 | 8.66E-05 |
| 2.79  | 2.26  | 2.65   | 0.0103 | 0.0105 | 0.0109 | 8.66E-05 |
| 0.011 | 0.012 | 0.0117 | 2.46   | 3.01   | 2.59   | 8.67E-05 |
| 0.011 | 0.012 | 0.0117 | 2.46   | 3.01   | 2.59   | 8.67E-05 |
| 3.19  | 2.6   | 2.76   | 0.0103 | 0.0105 | 0.0109 | 8.67E-05 |
| 0.011 | 0.012 | 0.0117 | 2.64   | 2.29   | 2.15   | 8.67E-05 |
| 2.41  | 2.56  | 2.07   | 0.0103 | 0.0105 | 0.0109 | 8.67E-05 |
| 2.41  | 2.56  | 2.07   | 0.0103 | 0.0105 | 0.0109 | 8.67E-05 |

|       |       |        |        |        |        |          |
|-------|-------|--------|--------|--------|--------|----------|
| 2.19  | 2.26  | 2.66   | 0.0103 | 0.0105 | 0.0109 | 8.67E-05 |
| 2.19  | 2.26  | 2.66   | 0.0103 | 0.0105 | 0.0109 | 8.67E-05 |
| 0.011 | 0.012 | 0.0117 | 3.02   | 2.89   | 2.45   | 8.72E-05 |
| 0.011 | 0.012 | 0.0117 | 3.02   | 2.89   | 2.45   | 8.72E-05 |
| 2.82  | 2.73  | 3.32   | 0.0103 | 0.0105 | 0.0109 | 8.80E-05 |
| 0.011 | 0.012 | 0.0117 | 2.61   | 3.22   | 2.82   | 8.81E-05 |
| 2.46  | 2.88  | 2.36   | 0.0103 | 0.0105 | 0.0109 | 8.82E-05 |
| 2.21  | 2.18  | 2.63   | 0.0103 | 0.0105 | 0.0109 | 8.84E-05 |
| 2.67  | 3.27  | 2.81   | 0.0103 | 0.0105 | 0.0109 | 8.84E-05 |
| 2.67  | 3.27  | 2.81   | 0.0103 | 0.0105 | 0.0109 | 8.84E-05 |
| 2.98  | 3.2   | 2.58   | 0.0103 | 0.0105 | 0.0109 | 8.85E-05 |
| 2.94  | 2.49  | 2.42   | 0.0103 | 0.0105 | 0.0109 | 8.93E-05 |
| 3.62  | 2.92  | 3.22   | 0.0103 | 0.0105 | 0.0109 | 8.94E-05 |
| 2.76  | 3.35  | 3.35   | 0.0103 | 0.0105 | 0.0109 | 8.97E-05 |
| 3.01  | 2.89  | 2.44   | 0.0103 | 0.0105 | 0.0109 | 9.00E-05 |
| 3.01  | 2.89  | 2.44   | 0.0103 | 0.0105 | 0.0109 | 9.00E-05 |
| 0.011 | 0.012 | 0.0117 | 2.41   | 2.79   | 2.27   | 9.02E-05 |
| 2.47  | 2.77  | 3.07   | 0.0103 | 0.0105 | 0.0109 | 9.07E-05 |
| 2.47  | 2.77  | 3.07   | 0.0103 | 0.0105 | 0.0109 | 9.07E-05 |
| 2.47  | 2.77  | 3.07   | 0.0103 | 0.0105 | 0.0109 | 9.07E-05 |
| 0.011 | 0.012 | 0.0117 | 2.25   | 2.77   | 2.4    | 9.07E-05 |
| 0.011 | 0.012 | 0.0117 | 3.46   | 2.79   | 3.07   | 9.07E-05 |
| 3.07  | 2.84  | 2.47   | 0.0103 | 0.0105 | 0.0109 | 9.09E-05 |
| 2.88  | 3.28  | 2.65   | 0.0103 | 0.0105 | 0.0109 | 9.15E-05 |
| 3.77  | 3.15  | 3.13   | 0.0103 | 0.0105 | 0.0109 | 9.15E-05 |
| 2.54  | 2.69  | 2.17   | 0.0103 | 0.0105 | 0.0109 | 9.16E-05 |
| 0.011 | 0.012 | 0.0117 | 2.62   | 3.07   | 2.51   | 9.17E-05 |
| 3.64  | 3.97  | 3.19   | 0.0103 | 0.0105 | 0.0109 | 9.19E-05 |
| 3.64  | 3.97  | 3.19   | 0.0103 | 0.0105 | 0.0109 | 9.19E-05 |
| 4.64  | 4.46  | 4.77   | 2.27   | 1.96   | 2.37   | 9.21E-05 |
| 4.64  | 4.46  | 4.77   | 2.27   | 1.96   | 2.37   | 9.21E-05 |
| 2.73  | 2.38  | 2.21   | 0.0103 | 0.0105 | 0.0109 | 9.21E-05 |
| 2.73  | 2.2   | 2.42   | 0.0103 | 0.0105 | 0.0109 | 9.22E-05 |
| 2.37  | 2.95  | 2.71   | 0.0103 | 0.0105 | 0.0109 | 9.27E-05 |
| 3.32  | 2.67  | 2.97   | 0.0103 | 0.0105 | 0.0109 | 9.27E-05 |
| 3.32  | 2.67  | 2.97   | 0.0103 | 0.0105 | 0.0109 | 9.27E-05 |
| 0.011 | 0.012 | 0.0117 | 3.15   | 2.98   | 2.54   | 9.29E-05 |
| 2.64  | 2.41  | 2.99   | 0.0103 | 0.0105 | 0.0109 | 9.30E-05 |
| 3     | 2.48  | 3.03   | 0.0103 | 0.0105 | 0.0109 | 9.31E-05 |
| 3     | 2.48  | 3.03   | 0.0103 | 0.0105 | 0.0109 | 9.31E-05 |
| 0.011 | 0.012 | 0.0117 | 2.83   | 2.28   | 2.5    | 9.38E-05 |
| 0.011 | 0.012 | 0.0117 | 2.83   | 2.28   | 2.5    | 9.38E-05 |
| 0.011 | 0.012 | 0.0117 | 3.74   | 3.07   | 3.73   | 9.39E-05 |
| 0.011 | 0.012 | 0.0117 | 3.74   | 3.07   | 3.73   | 9.39E-05 |
| 4.63  | 3.72  | 4.14   | 0.0103 | 0.0105 | 0.0109 | 9.39E-05 |
| 3.71  | 3.22  | 4.01   | 0.0103 | 0.0105 | 0.0109 | 9.39E-05 |
| 3.71  | 3.22  | 4.01   | 0.0103 | 0.0105 | 0.0109 | 9.39E-05 |
| 2.29  | 2.83  | 2.46   | 0.0103 | 0.0105 | 0.0109 | 9.41E-05 |
| 2.29  | 2.83  | 2.46   | 0.0103 | 0.0105 | 0.0109 | 9.41E-05 |
| 2.62  | 2.48  | 3.05   | 0.0103 | 0.0105 | 0.0109 | 9.42E-05 |
| 0.011 | 0.012 | 0.0117 | 2.89   | 2.85   | 2.36   | 9.43E-05 |
| 2.45  | 3.04  | 2.88   | 0.0103 | 0.0105 | 0.0109 | 9.43E-05 |
| 3.13  | 3.87  | 3.72   | 0.0103 | 0.0105 | 0.0109 | 9.44E-05 |
| 3.14  | 2.54  | 2.73   | 0.0103 | 0.0105 | 0.0109 | 9.44E-05 |
| 3.34  | 3.54  | 2.85   | 0.0103 | 0.0105 | 0.0109 | 9.44E-05 |
| 3.66  | 3.07  | 3.02   | 0.0103 | 0.0105 | 0.0109 | 9.46E-05 |
| 3.66  | 3.07  | 3.02   | 0.0103 | 0.0105 | 0.0109 | 9.46E-05 |
| 3.21  | 2.65  | 3.24   | 0.0103 | 0.0105 | 0.0109 | 9.48E-05 |

|       |       |        |        |        |        |          |
|-------|-------|--------|--------|--------|--------|----------|
| 2.78  | 2.54  | 2.23   | 0.0103 | 0.0105 | 0.0109 | 9.51E-05 |
| 2.78  | 2.54  | 2.23   | 0.0103 | 0.0105 | 0.0109 | 9.51E-05 |
| 2.3   | 2.79  | 2.34   | 0.0103 | 0.0105 | 0.0109 | 9.62E-05 |
| 0.011 | 0.012 | 0.0117 | 2.72   | 2.43   | 3.03   | 9.68E-05 |
| 0.011 | 0.012 | 0.0117 | 2.72   | 2.43   | 3.03   | 9.68E-05 |
| 0.011 | 0.012 | 0.0117 | 2.87   | 3.15   | 3.57   | 9.72E-05 |
| 0.011 | 0.012 | 0.0117 | 2.87   | 3.15   | 3.57   | 9.72E-05 |
| 2.44  | 2.04  | 2.52   | 0.0103 | 0.0105 | 0.0109 | 9.75E-05 |
| 2.44  | 2.04  | 2.52   | 0.0103 | 0.0105 | 0.0109 | 9.75E-05 |
| 2.53  | 2.92  | 2.36   | 0.0103 | 0.0105 | 0.0109 | 9.76E-05 |
| 2.53  | 2.92  | 2.36   | 0.0103 | 0.0105 | 0.0109 | 9.76E-05 |
| 3.14  | 2.52  | 2.79   | 0.0103 | 0.0105 | 0.0109 | 9.77E-05 |
| 2.3   | 2.66  | 2.87   | 0.0103 | 0.0105 | 0.0109 | 9.81E-05 |
| 0.011 | 0.012 | 0.0117 | 3.1    | 3.55   | 2.86   | 9.82E-05 |
| 0.011 | 0.012 | 0.0117 | 3.1    | 3.55   | 2.86   | 9.82E-05 |
| 3.61  | 4.1   | 4.51   | 0.0103 | 0.0105 | 0.0109 | 9.82E-05 |
| 0.011 | 0.012 | 0.0117 | 2.69   | 3.27   | 3.29   | 9.83E-05 |
| 0.011 | 0.012 | 0.0117 | 2.69   | 3.27   | 3.29   | 9.83E-05 |
| 2.67  | 2.48  | 2.14   | 0.0103 | 0.0105 | 0.0109 | 9.84E-05 |
| 2.67  | 2.48  | 2.14   | 0.0103 | 0.0105 | 0.0109 | 9.84E-05 |
| 0.011 | 0.012 | 0.0117 | 2.09   | 2.61   | 2.39   | 9.85E-05 |
| 2.06  | 2.54  | 2.18   | 0.0103 | 0.0105 | 0.0109 | 9.87E-05 |
| 3.44  | 3.6   | 2.9    | 0.0103 | 0.0105 | 0.0109 | 9.87E-05 |
| 3.44  | 3.6   | 2.9    | 0.0103 | 0.0105 | 0.0109 | 9.87E-05 |
| 2.2   | 2.2   | 2.65   | 0.0103 | 0.0105 | 0.0109 | 9.87E-05 |
| 2.32  | 2.87  | 2.48   | 0.0103 | 0.0105 | 0.0109 | 9.89E-05 |
| 0.011 | 0.012 | 0.0117 | 3.6    | 2.89   | 3.18   | 9.90E-05 |
| 0.011 | 0.012 | 0.0117 | 2.12   | 2.63   | 2.29   | 9.92E-05 |
| 2.65  | 2.53  | 3.11   | 0.0103 | 0.0105 | 0.0109 | 9.93E-05 |
| 3.2   | 3.42  | 3.96   | 0.0103 | 0.0105 | 0.0109 | 9.93E-05 |
| 3.2   | 3.42  | 3.96   | 0.0103 | 0.0105 | 0.0109 | 9.93E-05 |
| 3.29  | 2.73  | 2.73   | 0.0103 | 0.0105 | 0.0109 | 9.94E-05 |
| 0.011 | 0.012 | 0.0117 | 2.7    | 2.88   | 2.31   | 9.95E-05 |
| 0.011 | 0.012 | 0.0117 | 2.7    | 2.88   | 2.31   | 9.95E-05 |
| 3.15  | 2.57  | 2.67   | 0.0103 | 0.0105 | 0.0109 | 9.95E-05 |
| 3.63  | 2.91  | 3.4    | 0.0103 | 0.0105 | 0.0109 | 9.97E-05 |
| 3.2   | 2.56  | 2.94   | 0.0103 | 0.0105 | 0.0109 | 9.99E-05 |
| 3.2   | 2.56  | 2.94   | 0.0103 | 0.0105 | 0.0109 | 9.99E-05 |
| 3.29  | 2.64  | 3.1    | 0.0103 | 0.0105 | 0.0109 | 1.00E-04 |
| 3.29  | 2.64  | 3.1    | 0.0103 | 0.0105 | 0.0109 | 1.00E-04 |
| 0.011 | 0.012 | 0.0117 | 2.9    | 3.53   | 2.96   | 1.00E-04 |
| 4.26  | 3.99  | 4.94   | 0.0103 | 0.0105 | 0.0109 | 1.01E-04 |
| 0.011 | 0.012 | 0.0117 | 2.43   | 2.43   | 2.93   | 1.01E-04 |
| 4.29  | 4.4   | 4.31   | 2.6    | 2.41   | 2.78   | 1.01E-04 |
| 0.011 | 0.012 | 0.0117 | 2.74   | 2.51   | 2.19   | 1.02E-04 |
| 0.011 | 0.012 | 0.0117 | 2.74   | 2.51   | 2.19   | 1.02E-04 |
| 2.98  | 3.66  | 3.62   | 0.0103 | 0.0105 | 0.0109 | 1.02E-04 |
| 2.98  | 3.66  | 3.62   | 0.0103 | 0.0105 | 0.0109 | 1.02E-04 |
| 3.43  | 3.18  | 3.95   | 0.0103 | 0.0105 | 0.0109 | 1.02E-04 |
| 2.71  | 2.18  | 2.59   | 0.0103 | 0.0105 | 0.0109 | 1.02E-04 |
| 0.011 | 0.012 | 0.0117 | 3.15   | 3.53   | 3.94   | 1.02E-04 |
| 0.011 | 0.012 | 0.0117 | 3.15   | 3.53   | 3.94   | 1.02E-04 |
| 3     | 2.43  | 2.93   | 0.0103 | 0.0105 | 0.0109 | 1.02E-04 |
| 2.81  | 2.46  | 3.08   | 0.0103 | 0.0105 | 0.0109 | 1.02E-04 |
| 2.81  | 2.46  | 3.08   | 0.0103 | 0.0105 | 0.0109 | 1.02E-04 |
| 2.19  | 2.66  | 2.22   | 0.0103 | 0.0105 | 0.0109 | 1.03E-04 |
| 2.54  | 2.68  | 2.15   | 0.0103 | 0.0105 | 0.0109 | 1.03E-04 |
| 4.09  | 3.46  | 3.33   | 0.0103 | 0.0105 | 0.0109 | 1.04E-04 |

|       |       |        |        |        |        |          |
|-------|-------|--------|--------|--------|--------|----------|
| 3.48  | 3.05  | 2.79   | 0.0103 | 0.0105 | 0.0109 | 1.04E-04 |
| 2.51  | 3.13  | 2.74   | 0.0103 | 0.0105 | 0.0109 | 1.04E-04 |
| 3.18  | 3.81  | 3.95   | 0.0103 | 0.0105 | 0.0109 | 1.05E-04 |
| 3.18  | 3.81  | 3.95   | 0.0103 | 0.0105 | 0.0109 | 1.05E-04 |
| 0.011 | 0.012 | 0.0117 | 2.46   | 2.51   | 3      | 1.05E-04 |
| 4.48  | 3.97  | 3.58   | 0.0103 | 0.0105 | 0.0109 | 1.05E-04 |
| 4.48  | 3.97  | 3.58   | 0.0103 | 0.0105 | 0.0109 | 1.05E-04 |
| 2.26  | 2.82  | 2.47   | 0.0103 | 0.0105 | 0.0109 | 1.05E-04 |
| 2.26  | 2.82  | 2.47   | 0.0103 | 0.0105 | 0.0109 | 1.05E-04 |
| 3.28  | 2.62  | 2.91   | 0.0103 | 0.0105 | 0.0109 | 1.06E-04 |
| 3.28  | 2.62  | 2.91   | 0.0103 | 0.0105 | 0.0109 | 1.06E-04 |
| 2.86  | 2.28  | 2.6    | 0.0103 | 0.0105 | 0.0109 | 1.06E-04 |
| 2.55  | 2.61  | 2.11   | 0.0103 | 0.0105 | 0.0109 | 1.06E-04 |
| 3.08  | 2.88  | 2.46   | 0.0103 | 0.0105 | 0.0109 | 1.06E-04 |
| 0.011 | 0.012 | 0.0117 | 3.41   | 3.26   | 4.02   | 1.07E-04 |
| 0.011 | 0.012 | 0.0117 | 3.74   | 3.44   | 2.98   | 1.07E-04 |
| 2.4   | 2.69  | 3.01   | 0.0103 | 0.0105 | 0.0109 | 1.07E-04 |
| 0.011 | 0.012 | 0.0117 | 2.77   | 2.68   | 3.29   | 1.07E-04 |
| 3.07  | 2.7   | 3.39   | 0.0103 | 0.0105 | 0.0109 | 1.07E-04 |
| 3.07  | 2.7   | 3.39   | 0.0103 | 0.0105 | 0.0109 | 1.07E-04 |
| 3.43  | 3.07  | 3.85   | 0.0103 | 0.0105 | 0.0109 | 1.08E-04 |
| 3.43  | 3.07  | 3.85   | 0.0103 | 0.0105 | 0.0109 | 1.08E-04 |
| 4.79  | 3.99  | 3.93   | 0.0103 | 0.0105 | 0.0109 | 1.08E-04 |
| 0.011 | 0.012 | 0.0117 | 2.47   | 2.87   | 2.31   | 1.08E-04 |
| 0.011 | 0.012 | 0.0117 | 2.47   | 2.87   | 2.31   | 1.08E-04 |
| 2.67  | 2.49  | 2.13   | 0.0103 | 0.0105 | 0.0109 | 1.08E-04 |
| 0.011 | 0.012 | 0.0117 | 2.45   | 2.94   | 3.05   | 1.09E-04 |
| 0.011 | 0.012 | 0.0117 | 2.45   | 2.94   | 3.05   | 1.09E-04 |
| 2.46  | 2.57  | 2.06   | 0.0103 | 0.0105 | 0.0109 | 1.10E-04 |
| 4.24  | 3.75  | 3.38   | 0.0103 | 0.0105 | 0.0109 | 1.10E-04 |
| 3.23  | 4.05  | 3.57   | 0.0103 | 0.0105 | 0.0109 | 1.10E-04 |
| 0.011 | 0.012 | 0.0117 | 3.01   | 2.66   | 2.4    | 1.11E-04 |
| 0.011 | 0.012 | 0.0117 | 3.01   | 2.66   | 2.4    | 1.11E-04 |
| 0.011 | 0.012 | 0.0117 | 2.28   | 2.86   | 2.53   | 1.11E-04 |
| 3.49  | 4.38  | 4.1    | 0.0103 | 0.0105 | 0.0109 | 1.11E-04 |
| 2.99  | 3.74  | 3.26   | 0.0103 | 0.0105 | 0.0109 | 1.11E-04 |
| 2.92  | 3.08  | 2.46   | 0.0103 | 0.0105 | 0.0109 | 1.12E-04 |
| 3     | 3.06  | 2.99   | 2.57   | 2.54   | 2.49   | 1.12E-04 |
| 3     | 3.06  | 2.99   | 2.57   | 2.54   | 2.49   | 1.12E-04 |
| 2.58  | 3.08  | 2.51   | 0.0103 | 0.0105 | 0.0109 | 1.12E-04 |
| 2.74  | 3.26  | 2.65   | 0.0103 | 0.0105 | 0.0109 | 1.12E-04 |
| 2.68  | 2.42  | 2.13   | 0.0103 | 0.0105 | 0.0109 | 1.12E-04 |
| 2.68  | 2.42  | 2.13   | 0.0103 | 0.0105 | 0.0109 | 1.12E-04 |
| 3.28  | 2.61  | 2.91   | 0.0103 | 0.0105 | 0.0109 | 1.13E-04 |
| 2.32  | 2.92  | 2.68   | 0.0103 | 0.0105 | 0.0109 | 1.13E-04 |
| 0.011 | 0.012 | 0.0117 | 4.31   | 3.45   | 3.73   | 1.13E-04 |
| 2.77  | 2.7   | 2.23   | 0.0103 | 0.0105 | 0.0109 | 1.13E-04 |
| 3.5   | 3.61  | 2.9    | 0.0103 | 0.0105 | 0.0109 | 1.13E-04 |
| 0.011 | 0.012 | 0.0117 | 2.77   | 2.23   | 2.7    | 1.13E-04 |
| 2.51  | 3.16  | 2.9    | 0.0103 | 0.0105 | 0.0109 | 1.13E-04 |
| 2.51  | 3.16  | 2.9    | 0.0103 | 0.0105 | 0.0109 | 1.13E-04 |
| 0.011 | 0.012 | 0.0117 | 3.13   | 3.46   | 3.93   | 1.13E-04 |
| 0.011 | 0.012 | 0.0117 | 4.11   | 4.17   | 3.37   | 1.14E-04 |
| 2.18  | 2.7   | 2.29   | 0.0103 | 0.0105 | 0.0109 | 1.14E-04 |
| 2.18  | 2.7   | 2.29   | 0.0103 | 0.0105 | 0.0109 | 1.14E-04 |
| 0.011 | 0.012 | 0.0117 | 3.45   | 2.74   | 3.09   | 1.14E-04 |
| 0.011 | 0.012 | 0.0117 | 3.05   | 3.05   | 3.7    | 1.14E-04 |
| 0.011 | 0.012 | 0.0117 | 2.55   | 2.06   | 2.16   | 1.15E-04 |



|       |       |        |        |        |        |          |
|-------|-------|--------|--------|--------|--------|----------|
| 2.52  | 2.01  | 2.2    | 0.0103 | 0.0105 | 0.0109 | 1.15E-04 |
| 3.08  | 2.94  | 2.46   | 0.0103 | 0.0105 | 0.0109 | 1.15E-04 |
| 3.08  | 2.94  | 2.46   | 0.0103 | 0.0105 | 0.0109 | 1.15E-04 |
| 2.61  | 3.26  | 2.81   | 0.0103 | 0.0105 | 0.0109 | 1.15E-04 |
| 2.57  | 2.57  | 2.09   | 0.0103 | 0.0105 | 0.0109 | 1.15E-04 |
| 2.57  | 2.57  | 2.09   | 0.0103 | 0.0105 | 0.0109 | 1.15E-04 |
| 0.011 | 0.012 | 0.0117 | 3.17   | 3.76   | 3.98   | 1.15E-04 |
| 0.011 | 0.012 | 0.0117 | 2.58   | 2.67   | 2.14   | 1.16E-04 |
| 0.011 | 0.012 | 0.0117 | 2.58   | 2.67   | 2.14   | 1.16E-04 |
| 0.011 | 0.012 | 0.0117 | 2.87   | 3.62   | 3.29   | 1.16E-04 |
| 0.011 | 0.012 | 0.0117 | 2.87   | 3.62   | 3.29   | 1.16E-04 |
| 2.73  | 2.89  | 2.3    | 0.0103 | 0.0105 | 0.0109 | 1.17E-04 |
| 2.73  | 2.89  | 2.3    | 0.0103 | 0.0105 | 0.0109 | 1.17E-04 |
| 3.05  | 2.71  | 2.42   | 0.0103 | 0.0105 | 0.0109 | 1.18E-04 |
| 0.011 | 0.012 | 0.0117 | 3.49   | 2.81   | 2.96   | 1.18E-04 |
| 0.011 | 0.012 | 0.0117 | 3.49   | 2.81   | 2.96   | 1.18E-04 |
| 0.011 | 0.012 | 0.0117 | 3.14   | 2.53   | 2.66   | 1.18E-04 |
| 2.97  | 2.43  | 2.46   | 0.0103 | 0.0105 | 0.0109 | 1.18E-04 |
| 0.011 | 0.012 | 0.0117 | 2.43   | 3.01   | 2.54   | 1.18E-04 |
| 0.011 | 0.012 | 0.0117 | 2.52   | 3.08   | 2.55   | 1.19E-04 |
| 0.011 | 0.012 | 0.0117 | 2.52   | 3.08   | 2.55   | 1.19E-04 |
| 0.011 | 0.012 | 0.0117 | 3.1    | 2.69   | 2.47   | 1.20E-04 |
| 2.82  | 2.31  | 2.33   | 0.0103 | 0.0105 | 0.0109 | 1.20E-04 |
| 2.82  | 2.31  | 2.33   | 0.0103 | 0.0105 | 0.0109 | 1.20E-04 |
| 3.64  | 3.29  | 2.88   | 0.0103 | 0.0105 | 0.0109 | 1.20E-04 |
| 2.74  | 2.6   | 2.18   | 0.0103 | 0.0105 | 0.0109 | 1.20E-04 |
| 2.74  | 2.6   | 2.18   | 0.0103 | 0.0105 | 0.0109 | 1.20E-04 |
| 0.011 | 0.012 | 0.0117 | 2.48   | 3.13   | 2.91   | 1.21E-04 |
| 3.11  | 2.81  | 2.46   | 0.0103 | 0.0105 | 0.0109 | 1.21E-04 |
| 0.011 | 0.012 | 0.0117 | 2.75   | 3.47   | 3.07   | 1.21E-04 |
| 0.011 | 0.012 | 0.0117 | 2.75   | 3.47   | 3.07   | 1.21E-04 |
| 2.47  | 2.85  | 2.27   | 0.0103 | 0.0105 | 0.0109 | 1.21E-04 |
| 2.35  | 2.73  | 2.97   | 0.0103 | 0.0105 | 0.0109 | 1.21E-04 |
| 0.011 | 0.012 | 0.0117 | 3.23   | 2.73   | 2.6    | 1.21E-04 |
| 0.011 | 0.012 | 0.0117 | 3.23   | 2.73   | 2.6    | 1.21E-04 |
| 2.83  | 3.24  | 3.58   | 0.0103 | 0.0105 | 0.0109 | 1.22E-04 |
| 2.83  | 3.24  | 3.58   | 0.0103 | 0.0105 | 0.0109 | 1.22E-04 |
| 2.83  | 3.24  | 3.58   | 0.0103 | 0.0105 | 0.0109 | 1.22E-04 |
| 2.97  | 3.15  | 2.5    | 0.0103 | 0.0105 | 0.0109 | 1.22E-04 |
| 2.97  | 3.15  | 2.5    | 0.0103 | 0.0105 | 0.0109 | 1.22E-04 |
| 0.011 | 0.012 | 0.0117 | 2.08   | 2.58   | 2.55   | 1.22E-04 |
| 3.74  | 3.14  | 3.02   | 0.0103 | 0.0105 | 0.0109 | 1.22E-04 |
| 3.74  | 3.14  | 3.02   | 0.0103 | 0.0105 | 0.0109 | 1.22E-04 |
| 3.06  | 3.65  | 2.95   | 0.0103 | 0.0105 | 0.0109 | 1.22E-04 |
| 3.53  | 3.23  | 2.79   | 0.0103 | 0.0105 | 0.0109 | 1.22E-04 |
| 3.37  | 2.68  | 3.21   | 0.0103 | 0.0105 | 0.0109 | 1.23E-04 |
| 0.011 | 0.012 | 0.0117 | 3.39   | 2.81   | 2.76   | 1.24E-04 |
| 0.011 | 0.012 | 0.0117 | 3.39   | 2.81   | 2.76   | 1.24E-04 |
| 2.57  | 3.02  | 3.25   | 0.0103 | 0.0105 | 0.0109 | 1.25E-04 |
| 3.2   | 3.44  | 2.72   | 0.0103 | 0.0105 | 0.0109 | 1.25E-04 |
| 3.2   | 3.44  | 2.72   | 0.0103 | 0.0105 | 0.0109 | 1.25E-04 |
| 3.34  | 3.34  | 4.07   | 0.0103 | 0.0105 | 0.0109 | 1.25E-04 |
| 3.34  | 3.34  | 4.07   | 0.0103 | 0.0105 | 0.0109 | 1.25E-04 |
| 2.26  | 2.13  | 2.66   | 0.0103 | 0.0105 | 0.0109 | 1.26E-04 |
| 2.26  | 2.13  | 2.66   | 0.0103 | 0.0105 | 0.0109 | 1.26E-04 |
| 2.78  | 3.17  | 2.51   | 0.0103 | 0.0105 | 0.0109 | 1.26E-04 |
| 2.17  | 2.55  | 2.04   | 0.0103 | 0.0105 | 0.0109 | 1.26E-04 |
| 0.011 | 0.012 | 0.0117 | 2.16   | 2.67   | 2.67   | 1.27E-04 |

|       |       |        |        |        |        |          |
|-------|-------|--------|--------|--------|--------|----------|
| 0.011 | 0.012 | 0.0117 | 3      | 3.38   | 3.8    | 1.27E-04 |
| 3.5   | 3.68  | 2.92   | 0.0103 | 0.0105 | 0.0109 | 1.27E-04 |
| 0.011 | 0.012 | 0.0117 | 3.61   | 3.21   | 2.85   | 1.27E-04 |
| 3.18  | 3.09  | 2.54   | 0.0103 | 0.0105 | 0.0109 | 1.27E-04 |
| 2.96  | 2.35  | 2.56   | 0.0103 | 0.0105 | 0.0109 | 1.28E-04 |
| 2.96  | 2.35  | 2.56   | 0.0103 | 0.0105 | 0.0109 | 1.28E-04 |
| 0.011 | 0.012 | 0.0117 | 2.41   | 2.93   | 3.02   | 1.28E-04 |
| 0.011 | 0.012 | 0.0117 | 2.41   | 2.93   | 3.02   | 1.28E-04 |
| 0.011 | 0.012 | 0.0117 | 3.07   | 3.86   | 3.71   | 1.28E-04 |
| 0.011 | 0.012 | 0.0117 | 3.07   | 3.86   | 3.71   | 1.28E-04 |
| 3.21  | 2.65  | 3.33   | 0.0103 | 0.0105 | 0.0109 | 1.29E-04 |
| 3.21  | 2.65  | 3.33   | 0.0103 | 0.0105 | 0.0109 | 1.29E-04 |
| 3.21  | 2.65  | 3.33   | 0.0103 | 0.0105 | 0.0109 | 1.29E-04 |
| 2.61  | 3.25  | 3.21   | 0.0103 | 0.0105 | 0.0109 | 1.30E-04 |
| 2.65  | 2.21  | 2.14   | 0.0103 | 0.0105 | 0.0109 | 1.30E-04 |
| 3.21  | 2.53  | 2.96   | 0.0103 | 0.0105 | 0.0109 | 1.30E-04 |
| 0.011 | 0.012 | 0.0117 | 2.53   | 2.55   | 3.1    | 1.30E-04 |
| 0.011 | 0.012 | 0.0117 | 2.54   | 3.15   | 3.14   | 1.30E-04 |
| 3.48  | 4.38  | 4.21   | 0.0103 | 0.0105 | 0.0109 | 1.30E-04 |
| 2.7   | 3.38  | 3.3    | 0.0103 | 0.0105 | 0.0109 | 1.31E-04 |
| 3.11  | 3.63  | 3.95   | 0.0103 | 0.0105 | 0.0109 | 1.31E-04 |
| 2.27  | 2.71  | 2.18   | 0.0103 | 0.0105 | 0.0109 | 1.31E-04 |
| 3.77  | 3.05  | 3.13   | 0.0103 | 0.0105 | 0.0109 | 1.31E-04 |
| 3.06  | 3.3   | 2.6    | 0.0103 | 0.0105 | 0.0109 | 1.32E-04 |
| 3     | 2.62  | 2.37   | 0.0103 | 0.0105 | 0.0109 | 1.32E-04 |
| 3     | 2.62  | 2.37   | 0.0103 | 0.0105 | 0.0109 | 1.32E-04 |
| 0.011 | 0.012 | 0.0117 | 2.03   | 2.58   | 2.34   | 1.32E-04 |
| 0.011 | 0.012 | 0.0117 | 2.03   | 2.58   | 2.34   | 1.32E-04 |
| 2.14  | 2.33  | 2.7    | 0.0103 | 0.0105 | 0.0109 | 1.33E-04 |
| 2.14  | 2.33  | 2.7    | 0.0103 | 0.0105 | 0.0109 | 1.33E-04 |
| 4.78  | 4.27  | 3.76   | 0.0103 | 0.0105 | 0.0109 | 1.33E-04 |
| 2.17  | 2.7   | 2.26   | 0.0103 | 0.0105 | 0.0109 | 1.33E-04 |
| 3.18  | 2.74  | 2.52   | 0.0103 | 0.0105 | 0.0109 | 1.33E-04 |
| 3.55  | 3.11  | 2.8    | 0.0103 | 0.0105 | 0.0109 | 1.34E-04 |
| 3.44  | 3.92  | 3.09   | 0.0103 | 0.0105 | 0.0109 | 1.34E-04 |
| 2.96  | 2.93  | 3.6    | 0.0103 | 0.0105 | 0.0109 | 1.34E-04 |
| 2.96  | 2.93  | 3.6    | 0.0103 | 0.0105 | 0.0109 | 1.34E-04 |
| 3.68  | 3.31  | 4.2    | 0.0103 | 0.0105 | 0.0109 | 1.35E-04 |
| 2.58  | 2.18  | 2.06   | 0.0103 | 0.0105 | 0.0109 | 1.35E-04 |
| 0.011 | 0.012 | 0.0117 | 2.33   | 2.95   | 2.56   | 1.36E-04 |
| 4     | 3.43  | 3.17   | 0.0103 | 0.0105 | 0.0109 | 1.36E-04 |
| 4     | 3.43  | 3.17   | 0.0103 | 0.0105 | 0.0109 | 1.36E-04 |
| 2.67  | 2.1   | 2.36   | 0.0103 | 0.0105 | 0.0109 | 1.37E-04 |
| 2.36  | 2.98  | 2.86   | 0.0103 | 0.0105 | 0.0109 | 1.37E-04 |
| 2.36  | 2.98  | 2.86   | 0.0103 | 0.0105 | 0.0109 | 1.37E-04 |
| 0.011 | 0.012 | 0.0117 | 3.1    | 2.44   | 2.72   | 1.38E-04 |
| 3.5   | 2.88  | 2.84   | 0.0103 | 0.0105 | 0.0109 | 1.38E-04 |
| 0.011 | 0.012 | 0.0117 | 3.51   | 3.44   | 2.8    | 1.38E-04 |
| 0.011 | 0.012 | 0.0117 | 3.51   | 3.44   | 2.8    | 1.38E-04 |
| 0.011 | 0.012 | 0.0117 | 3.6    | 3.91   | 3.07   | 1.38E-04 |
| 0.011 | 0.012 | 0.0117 | 3.6    | 3.91   | 3.07   | 1.38E-04 |
| 0.011 | 0.012 | 0.0117 | 2.27   | 2.03   | 2.58   | 1.38E-04 |
| 2.16  | 2.75  | 2.54   | 0.0103 | 0.0105 | 0.0109 | 1.38E-04 |
| 3.35  | 2.96  | 3.77   | 0.0103 | 0.0105 | 0.0109 | 1.38E-04 |
| 3.35  | 2.96  | 3.77   | 0.0103 | 0.0105 | 0.0109 | 1.38E-04 |
| 3.35  | 2.96  | 3.77   | 0.0103 | 0.0105 | 0.0109 | 1.38E-04 |
| 0.011 | 0.012 | 0.0117 | 3.56   | 2.83   | 3.46   | 1.38E-04 |
| 0.011 | 0.012 | 0.0117 | 3.56   | 2.83   | 3.46   | 1.38E-04 |

|       |       |        |        |        |        |          |
|-------|-------|--------|--------|--------|--------|----------|
| 3.38  | 2.96  | 2.66   | 0.0103 | 0.0105 | 0.0109 | 1.38E-04 |
| 3.38  | 2.96  | 2.66   | 0.0103 | 0.0105 | 0.0109 | 1.38E-04 |
| 0.011 | 0.012 | 0.0117 | 2.73   | 3.36   | 3.42   | 1.38E-04 |
| 0.011 | 0.012 | 0.0117 | 2.73   | 3.36   | 3.42   | 1.38E-04 |
| 0.011 | 0.012 | 0.0117 | 2.83   | 2.86   | 2.29   | 1.39E-04 |
| 2.59  | 2.08  | 2.58   | 0.0103 | 0.0105 | 0.0109 | 1.39E-04 |
| 2.94  | 3.14  | 3.7    | 0.0103 | 0.0105 | 0.0109 | 1.39E-04 |
| 0.011 | 0.012 | 0.0117 | 2.94   | 2.9    | 2.35   | 1.40E-04 |
| 0.011 | 0.012 | 0.0117 | 2.94   | 2.9    | 2.35   | 1.40E-04 |
| 3.27  | 3.32  | 2.65   | 0.0103 | 0.0105 | 0.0109 | 1.41E-04 |
| 3.6   | 4.1   | 3.22   | 0.0103 | 0.0105 | 0.0109 | 1.41E-04 |
| 0.011 | 0.012 | 0.0117 | 2.71   | 3.03   | 3.45   | 1.41E-04 |
| 3.21  | 3.83  | 3.06   | 0.0103 | 0.0105 | 0.0109 | 1.41E-04 |
| 3.36  | 3.62  | 2.84   | 0.0103 | 0.0105 | 0.0109 | 1.42E-04 |
| 3.38  | 2.65  | 3.12   | 0.0103 | 0.0105 | 0.0109 | 1.42E-04 |
| 0.011 | 0.012 | 0.0117 | 2.52   | 2.46   | 3.05   | 1.42E-04 |
| 3.39  | 2.79  | 3.53   | 0.0103 | 0.0105 | 0.0109 | 1.42E-04 |
| 3.02  | 2.57  | 3.28   | 0.0103 | 0.0105 | 0.0109 | 1.43E-04 |
| 3.02  | 2.57  | 3.28   | 0.0103 | 0.0105 | 0.0109 | 1.43E-04 |
| 3.33  | 2.71  | 2.72   | 0.0103 | 0.0105 | 0.0109 | 1.43E-04 |
| 3.33  | 2.71  | 2.72   | 0.0103 | 0.0105 | 0.0109 | 1.43E-04 |
| 2.51  | 2.64  | 2.08   | 0.0103 | 0.0105 | 0.0109 | 1.44E-04 |
| 0.011 | 0.012 | 0.0117 | 3.4    | 3.69   | 2.89   | 1.44E-04 |
| 2.59  | 3.25  | 2.73   | 0.0103 | 0.0105 | 0.0109 | 1.44E-04 |
| 2.72  | 2.14  | 2.36   | 0.0103 | 0.0105 | 0.0109 | 1.44E-04 |
| 0.011 | 0.012 | 0.0117 | 2.99   | 2.34   | 2.68   | 1.44E-04 |
| 2.56  | 2.02  | 2.45   | 0.0103 | 0.0105 | 0.0109 | 1.44E-04 |
| 0.011 | 0.012 | 0.0117 | 3.53   | 2.77   | 3.09   | 1.45E-04 |
| 3.42  | 3.04  | 3.88   | 0.0103 | 0.0105 | 0.0109 | 1.45E-04 |
| 3.01  | 2.62  | 3.35   | 0.0103 | 0.0105 | 0.0109 | 1.45E-04 |
| 2.71  | 2.75  | 3.35   | 0.0103 | 0.0105 | 0.0109 | 1.45E-04 |
| 2.71  | 2.75  | 3.35   | 0.0103 | 0.0105 | 0.0109 | 1.45E-04 |
| 2.71  | 2.75  | 3.35   | 0.0103 | 0.0105 | 0.0109 | 1.45E-04 |
| 3.53  | 2.78  | 3.04   | 0.0103 | 0.0105 | 0.0109 | 1.46E-04 |
| 2.06  | 2.44  | 2.63   | 0.0103 | 0.0105 | 0.0109 | 1.46E-04 |
| 2.06  | 2.44  | 2.63   | 0.0103 | 0.0105 | 0.0109 | 1.46E-04 |
| 2.61  | 2.09  | 2.6    | 0.0103 | 0.0105 | 0.0109 | 1.46E-04 |
| 3.85  | 3.1   | 3.88   | 0.0103 | 0.0105 | 0.0109 | 1.47E-04 |
| 2.3   | 2.94  | 2.71   | 0.0103 | 0.0105 | 0.0109 | 1.47E-04 |
| 2.5   | 3.12  | 2.59   | 0.0103 | 0.0105 | 0.0109 | 1.47E-04 |
| 2.5   | 3.12  | 2.59   | 0.0103 | 0.0105 | 0.0109 | 1.47E-04 |
| 2.17  | 2.72  | 2.69   | 0.0103 | 0.0105 | 0.0109 | 1.47E-04 |
| 2.63  | 2.96  | 3.36   | 0.0103 | 0.0105 | 0.0109 | 1.47E-04 |
| 2.63  | 2.96  | 3.36   | 0.0103 | 0.0105 | 0.0109 | 1.47E-04 |
| 4.26  | 3.33  | 3.92   | 0.0103 | 0.0105 | 0.0109 | 1.48E-04 |
| 0.011 | 0.012 | 0.0117 | 2.71   | 2.57   | 3.23   | 1.48E-04 |
| 2.27  | 2.55  | 2.9    | 0.0103 | 0.0105 | 0.0109 | 1.48E-04 |
| 0.011 | 0.012 | 0.0117 | 2.77   | 3.49   | 2.94   | 1.48E-04 |
| 0.011 | 0.012 | 0.0117 | 2.32   | 2.94   | 2.51   | 1.49E-04 |
| 0.011 | 0.012 | 0.0117 | 2.23   | 2.74   | 2.23   | 1.49E-04 |
| 2.37  | 2.5   | 2.98   | 0.0103 | 0.0105 | 0.0109 | 1.49E-04 |
| 2.94  | 3.76  | 3.31   | 0.0103 | 0.0105 | 0.0109 | 1.50E-04 |
| 2.94  | 3.76  | 3.31   | 0.0103 | 0.0105 | 0.0109 | 1.50E-04 |
| 3.27  | 3.03  | 3.84   | 0.0103 | 0.0105 | 0.0109 | 1.50E-04 |
| 3.47  | 3.91  | 4.44   | 0.0103 | 0.0105 | 0.0109 | 1.50E-04 |
| 3.47  | 3.91  | 4.44   | 0.0103 | 0.0105 | 0.0109 | 1.50E-04 |
| 3.47  | 3.91  | 4.44   | 0.0103 | 0.0105 | 0.0109 | 1.50E-04 |
| 3.47  | 3.91  | 4.44   | 0.0103 | 0.0105 | 0.0109 | 1.50E-04 |

|       |       |        |        |        |        |          |
|-------|-------|--------|--------|--------|--------|----------|
| 2.6   | 3.29  | 2.79   | 0.0103 | 0.0105 | 0.0109 | 1.51E-04 |
| 2.67  | 3.01  | 2.35   | 0.0103 | 0.0105 | 0.0109 | 1.51E-04 |
| 3.31  | 3.74  | 2.92   | 0.0103 | 0.0105 | 0.0109 | 1.51E-04 |
| 3     | 2.42  | 2.46   | 0.0103 | 0.0105 | 0.0109 | 1.52E-04 |
| 3     | 2.42  | 2.46   | 0.0103 | 0.0105 | 0.0109 | 1.52E-04 |
| 0.011 | 0.012 | 0.0117 | 2.31   | 2.36   | 2.87   | 1.52E-04 |
| 0.011 | 0.012 | 0.0117 | 2.31   | 2.36   | 2.87   | 1.52E-04 |
| 2.59  | 2.07  | 2.15   | 0.0103 | 0.0105 | 0.0109 | 1.52E-04 |
| 2.59  | 2.07  | 2.15   | 0.0103 | 0.0105 | 0.0109 | 1.52E-04 |
| 3.3   | 2.63  | 2.75   | 0.0103 | 0.0105 | 0.0109 | 1.52E-04 |
| 3.3   | 2.63  | 2.75   | 0.0103 | 0.0105 | 0.0109 | 1.52E-04 |
| 3.43  | 4     | 4.4    | 0.0103 | 0.0105 | 0.0109 | 1.52E-04 |
| 0.011 | 0.012 | 0.0117 | 3.14   | 2.59   | 2.52   | 1.52E-04 |
| 0.011 | 0.012 | 0.0117 | 3.14   | 2.59   | 2.52   | 1.52E-04 |
| 2.73  | 2.24  | 2.2    | 0.0103 | 0.0105 | 0.0109 | 1.53E-04 |
| 4.91  | 5.03  | 5.16   | 3.11   | 3.44   | 3.37   | 1.53E-04 |
| 4.91  | 5.03  | 5.16   | 3.11   | 3.44   | 3.37   | 1.53E-04 |
| 2.99  | 3.62  | 2.9    | 0.0103 | 0.0105 | 0.0109 | 1.53E-04 |
| 3.54  | 4.5   | 4.32   | 0.0103 | 0.0105 | 0.0109 | 1.53E-04 |
| 3.32  | 2.65  | 3.31   | 0.0103 | 0.0105 | 0.0109 | 1.55E-04 |
| 2.24  | 2.52  | 2.87   | 0.0103 | 0.0105 | 0.0109 | 1.55E-04 |
| 2.24  | 2.52  | 2.87   | 0.0103 | 0.0105 | 0.0109 | 1.55E-04 |
| 3.15  | 2.68  | 2.48   | 0.0103 | 0.0105 | 0.0109 | 1.56E-04 |
| 3.29  | 2.57  | 3.08   | 0.0103 | 0.0105 | 0.0109 | 1.56E-04 |
| 3.29  | 2.57  | 3.08   | 0.0103 | 0.0105 | 0.0109 | 1.56E-04 |
| 0.011 | 0.012 | 0.0117 | 3.78   | 2.96   | 3.58   | 1.56E-04 |
| 0.011 | 0.012 | 0.0117 | 3.78   | 2.96   | 3.58   | 1.56E-04 |
| 4.65  | 3.88  | 4.97   | 0.0103 | 0.0105 | 0.0109 | 1.56E-04 |
| 2.58  | 2.29  | 2.01   | 0.0103 | 0.0105 | 0.0109 | 1.57E-04 |
| 0.011 | 0.012 | 0.0117 | 2.28   | 2.74   | 2.18   | 1.57E-04 |
| 0.011 | 0.012 | 0.0117 | 2.28   | 2.74   | 2.18   | 1.57E-04 |
| 0.011 | 0.012 | 0.0117 | 2.65   | 3.39   | 3.2    | 1.58E-04 |
| 0.011 | 0.012 | 0.0117 | 3.04   | 3.91   | 3.53   | 1.59E-04 |
| 3.24  | 2.84  | 3.65   | 0.0103 | 0.0105 | 0.0109 | 1.59E-04 |
| 2.1   | 2.34  | 2.69   | 0.0103 | 0.0105 | 0.0109 | 1.59E-04 |
| 3.07  | 3.95  | 3.57   | 0.0103 | 0.0105 | 0.0109 | 1.59E-04 |
| 2.98  | 2.64  | 3.39   | 0.0103 | 0.0105 | 0.0109 | 1.60E-04 |
| 2.98  | 2.64  | 3.39   | 0.0103 | 0.0105 | 0.0109 | 1.60E-04 |
| 2.81  | 2.25  | 2.83   | 0.0103 | 0.0105 | 0.0109 | 1.61E-04 |
| 3.43  | 3.49  | 2.76   | 0.0103 | 0.0105 | 0.0109 | 1.62E-04 |
| 3.43  | 3.49  | 2.76   | 0.0103 | 0.0105 | 0.0109 | 1.62E-04 |
| 3.08  | 3.52  | 2.74   | 0.0103 | 0.0105 | 0.0109 | 1.62E-04 |
| 3.08  | 3.52  | 2.74   | 0.0103 | 0.0105 | 0.0109 | 1.62E-04 |
| 3.08  | 3.52  | 2.74   | 0.0103 | 0.0105 | 0.0109 | 1.62E-04 |
| 3.22  | 2.92  | 2.5    | 0.0103 | 0.0105 | 0.0109 | 1.62E-04 |
| 3.22  | 2.92  | 2.5    | 0.0103 | 0.0105 | 0.0109 | 1.62E-04 |
| 2.77  | 3.49  | 3.46   | 0.0103 | 0.0105 | 0.0109 | 1.63E-04 |
| 2.77  | 3.49  | 3.46   | 0.0103 | 0.0105 | 0.0109 | 1.63E-04 |
| 2.85  | 3.6   | 3.55   | 0.0103 | 0.0105 | 0.0109 | 1.63E-04 |
| 0.011 | 0.012 | 0.0117 | 3.19   | 2.95   | 2.48   | 1.63E-04 |
| 0.011 | 0.012 | 0.0117 | 3.22   | 2.94   | 2.5    | 1.63E-04 |
| 3.03  | 3.13  | 2.46   | 0.0103 | 0.0105 | 0.0109 | 1.64E-04 |
| 2.48  | 2.22  | 2.85   | 0.0103 | 0.0105 | 0.0109 | 1.64E-04 |
| 0.011 | 0.012 | 0.0117 | 2.99   | 2.68   | 2.32   | 1.65E-04 |
| 4.17  | 3.26  | 3.98   | 0.0103 | 0.0105 | 0.0109 | 1.65E-04 |
| 0.011 | 0.012 | 0.0117 | 2.9    | 3.72   | 3.51   | 1.65E-04 |
| 0.011 | 0.012 | 0.0117 | 3.16   | 2.45   | 2.85   | 1.66E-04 |
| 2.8   | 2.87  | 2.26   | 0.0103 | 0.0105 | 0.0109 | 1.66E-04 |

|       |       |        |        |        |        |          |
|-------|-------|--------|--------|--------|--------|----------|
| 2.8   | 2.87  | 2.26   | 0.0103 | 0.0105 | 0.0109 | 1.66E-04 |
| 2.41  | 2.99  | 3.06   | 0.0103 | 0.0105 | 0.0109 | 1.67E-04 |
| 2.41  | 2.99  | 3.06   | 0.0103 | 0.0105 | 0.0109 | 1.67E-04 |
| 2.24  | 2.75  | 2.21   | 0.0103 | 0.0105 | 0.0109 | 1.67E-04 |
| 2.24  | 2.75  | 2.21   | 0.0103 | 0.0105 | 0.0109 | 1.67E-04 |
| 2.64  | 3.14  | 2.47   | 0.0103 | 0.0105 | 0.0109 | 1.68E-04 |
| 3.82  | 3.06  | 3.12   | 0.0103 | 0.0105 | 0.0109 | 1.68E-04 |
| 3.75  | 3.29  | 2.91   | 0.0103 | 0.0105 | 0.0109 | 1.69E-04 |
| 2.49  | 3.12  | 2.56   | 0.0103 | 0.0105 | 0.0109 | 1.69E-04 |
| 2.49  | 3.12  | 2.56   | 0.0103 | 0.0105 | 0.0109 | 1.69E-04 |
| 2.93  | 2.76  | 2.28   | 0.0103 | 0.0105 | 0.0109 | 1.69E-04 |
| 2.88  | 2.88  | 2.29   | 0.0103 | 0.0105 | 0.0109 | 1.70E-04 |
| 0.011 | 0.012 | 0.0117 | 2.53   | 3.15   | 3.21   | 1.70E-04 |
| 4.37  | 3.4   | 3.77   | 0.0103 | 0.0105 | 0.0109 | 1.71E-04 |
| 2.81  | 3.2   | 2.48   | 0.0103 | 0.0105 | 0.0109 | 1.72E-04 |
| 2.81  | 3.2   | 2.48   | 0.0103 | 0.0105 | 0.0109 | 1.72E-04 |
| 2.44  | 3.05  | 3.09   | 0.0103 | 0.0105 | 0.0109 | 1.72E-04 |
| 2.44  | 3.05  | 3.09   | 0.0103 | 0.0105 | 0.0109 | 1.72E-04 |
| 2     | 2.39  | 2.58   | 0.0103 | 0.0105 | 0.0109 | 1.72E-04 |
| 2     | 2.39  | 2.58   | 0.0103 | 0.0105 | 0.0109 | 1.72E-04 |
| 0.011 | 0.012 | 0.0117 | 2.48   | 2.72   | 3.18   | 1.72E-04 |
| 0.011 | 0.012 | 0.0117 | 3.56   | 3.59   | 2.84   | 1.72E-04 |
| 3.01  | 3.66  | 3.87   | 0.0103 | 0.0105 | 0.0109 | 1.73E-04 |
| 0.011 | 0.012 | 0.0117 | 2.15   | 2.68   | 2.18   | 1.73E-04 |
| 2.61  | 2.42  | 3.09   | 0.0103 | 0.0105 | 0.0109 | 1.73E-04 |
| 2.67  | 2.09  | 2.58   | 0.0103 | 0.0105 | 0.0109 | 1.73E-04 |
| 2.67  | 2.09  | 2.58   | 0.0103 | 0.0105 | 0.0109 | 1.73E-04 |
| 3.72  | 4.37  | 3.41   | 0.0103 | 0.0105 | 0.0109 | 1.73E-04 |
| 2.83  | 2.3   | 2.27   | 0.0103 | 0.0105 | 0.0109 | 1.74E-04 |
| 2.83  | 2.3   | 2.27   | 0.0103 | 0.0105 | 0.0109 | 1.74E-04 |
| 2.62  | 3.33  | 2.78   | 0.0103 | 0.0105 | 0.0109 | 1.75E-04 |
| 2.62  | 3.33  | 2.78   | 0.0103 | 0.0105 | 0.0109 | 1.75E-04 |
| 3.23  | 3.24  | 4.01   | 0.0103 | 0.0105 | 0.0109 | 1.75E-04 |
| 3.23  | 3.24  | 4.01   | 0.0103 | 0.0105 | 0.0109 | 1.75E-04 |
| 3.23  | 3.24  | 4.01   | 0.0103 | 0.0105 | 0.0109 | 1.75E-04 |
| 3.02  | 3.63  | 2.86   | 0.0103 | 0.0105 | 0.0109 | 1.76E-04 |
| 3.02  | 3.63  | 2.86   | 0.0103 | 0.0105 | 0.0109 | 1.76E-04 |
| 3.02  | 2.82  | 2.34   | 0.0103 | 0.0105 | 0.0109 | 1.76E-04 |
| 3.02  | 2.82  | 2.34   | 0.0103 | 0.0105 | 0.0109 | 1.76E-04 |
| 4.36  | 3.53  | 4.52   | 0.0103 | 0.0105 | 0.0109 | 1.77E-04 |
| 4.36  | 3.53  | 4.52   | 0.0103 | 0.0105 | 0.0109 | 1.77E-04 |
| 4.36  | 3.53  | 4.52   | 0.0103 | 0.0105 | 0.0109 | 1.77E-04 |
| 2.91  | 2.38  | 3.06   | 0.0103 | 0.0105 | 0.0109 | 1.77E-04 |
| 2.58  | 2.52  | 3.16   | 0.0103 | 0.0105 | 0.0109 | 1.77E-04 |
| 2.96  | 2.31  | 2.51   | 0.0103 | 0.0105 | 0.0109 | 1.77E-04 |
| 2.96  | 2.31  | 2.51   | 0.0103 | 0.0105 | 0.0109 | 1.77E-04 |
| 2.96  | 2.31  | 2.51   | 0.0103 | 0.0105 | 0.0109 | 1.77E-04 |
| 4.16  | 3.75  | 3.21   | 0.0103 | 0.0105 | 0.0109 | 1.78E-04 |
| 4.16  | 3.75  | 3.21   | 0.0103 | 0.0105 | 0.0109 | 1.78E-04 |
| 2.9   | 2.47  | 3.2    | 0.0103 | 0.0105 | 0.0109 | 1.78E-04 |
| 2.81  | 3.62  | 3.42   | 0.0103 | 0.0105 | 0.0109 | 1.78E-04 |
| 0.011 | 0.012 | 0.0117 | 3.07   | 3.97   | 3.68   | 1.78E-04 |
| 0.011 | 0.012 | 0.0117 | 2.87   | 2.22   | 2.66   | 1.78E-04 |
| 0.011 | 0.012 | 0.0117 | 2.87   | 2.22   | 2.66   | 1.78E-04 |
| 0.011 | 0.012 | 0.0117 | 3.65   | 4.27   | 3.32   | 1.79E-04 |
| 3.38  | 3.95  | 3.07   | 0.0103 | 0.0105 | 0.0109 | 1.79E-04 |
| 3.38  | 3.95  | 3.07   | 0.0103 | 0.0105 | 0.0109 | 1.79E-04 |
| 0.011 | 0.012 | 0.0117 | 2.89   | 2.23   | 2.59   | 1.79E-04 |

|       |       |        |        |        |        |          |
|-------|-------|--------|--------|--------|--------|----------|
| 0.011 | 0.012 | 0.0117 | 3.85   | 4.02   | 3.13   | 1.79E-04 |
| 0.011 | 0.012 | 0.0117 | 3.85   | 4.02   | 3.13   | 1.79E-04 |
| 0.011 | 0.012 | 0.0117 | 2.9    | 3.05   | 2.37   | 1.80E-04 |
| 2.54  | 3     | 2.34   | 0.0103 | 0.0105 | 0.0109 | 1.80E-04 |
| 2.54  | 3     | 2.34   | 0.0103 | 0.0105 | 0.0109 | 1.80E-04 |
| 3.32  | 2.66  | 2.69   | 0.0103 | 0.0105 | 0.0109 | 1.80E-04 |
| 0.011 | 0.012 | 0.0117 | 2.48   | 3.11   | 3.15   | 1.81E-04 |
| 0.011 | 0.012 | 0.0117 | 2.53   | 3.26   | 3.09   | 1.81E-04 |
| 3.79  | 2.94  | 3.59   | 0.0103 | 0.0105 | 0.0109 | 1.81E-04 |
| 3.18  | 3.52  | 4.1    | 0.0103 | 0.0105 | 0.0109 | 1.81E-04 |
| 2.91  | 2.64  | 3.4    | 0.0103 | 0.0105 | 0.0109 | 1.81E-04 |
| 0.011 | 0.012 | 0.0117 | 2.97   | 2.99   | 2.36   | 1.82E-04 |
| 3.37  | 2.68  | 3.4    | 0.0103 | 0.0105 | 0.0109 | 1.82E-04 |
| 3.37  | 2.68  | 3.4    | 0.0103 | 0.0105 | 0.0109 | 1.82E-04 |
| 2.99  | 2.78  | 2.31   | 0.0103 | 0.0105 | 0.0109 | 1.82E-04 |
| 2.89  | 3.18  | 2.45   | 0.0103 | 0.0105 | 0.0109 | 1.83E-04 |
| 0.011 | 0.012 | 0.0117 | 2.19   | 2.79   | 2.74   | 1.83E-04 |
| 2.88  | 2.29  | 2.35   | 0.0103 | 0.0105 | 0.0109 | 1.84E-04 |
| 2.88  | 2.29  | 2.35   | 0.0103 | 0.0105 | 0.0109 | 1.84E-04 |
| 3.13  | 2.41  | 2.81   | 0.0103 | 0.0105 | 0.0109 | 1.84E-04 |
| 3.13  | 2.41  | 2.81   | 0.0103 | 0.0105 | 0.0109 | 1.84E-04 |
| 3.13  | 2.41  | 2.81   | 0.0103 | 0.0105 | 0.0109 | 1.84E-04 |
| 0.011 | 0.012 | 0.0117 | 2.78   | 2.87   | 2.24   | 1.84E-04 |
| 2.29  | 2.76  | 2.17   | 0.0103 | 0.0105 | 0.0109 | 1.84E-04 |
| 3.32  | 2.63  | 3.33   | 0.0103 | 0.0105 | 0.0109 | 1.84E-04 |
| 3.48  | 3.22  | 4.13   | 0.0103 | 0.0105 | 0.0109 | 1.85E-04 |
| 0.011 | 0.012 | 0.0117 | 2.55   | 3.15   | 2.52   | 1.85E-04 |
| 4.29  | 3.31  | 3.99   | 0.0103 | 0.0105 | 0.0109 | 1.85E-04 |
| 4.16  | 3.51  | 3.24   | 0.0103 | 0.0105 | 0.0109 | 1.86E-04 |
| 2.5   | 3.05  | 3.23   | 0.0103 | 0.0105 | 0.0109 | 1.86E-04 |
| 2.5   | 3.05  | 3.23   | 0.0103 | 0.0105 | 0.0109 | 1.86E-04 |
| 4.02  | 3.11  | 3.46   | 0.0103 | 0.0105 | 0.0109 | 1.86E-04 |
| 2.51  | 2.37  | 3.02   | 0.0103 | 0.0105 | 0.0109 | 1.86E-04 |
| 2.51  | 2.37  | 3.02   | 0.0103 | 0.0105 | 0.0109 | 1.86E-04 |
| 0.011 | 0.012 | 0.0117 | 4.01   | 3.09   | 3.52   | 1.86E-04 |
| 3.12  | 2.49  | 2.53   | 0.0103 | 0.0105 | 0.0109 | 1.86E-04 |
| 3.12  | 2.49  | 2.53   | 0.0103 | 0.0105 | 0.0109 | 1.86E-04 |
| 3.29  | 2.97  | 2.53   | 0.0103 | 0.0105 | 0.0109 | 1.87E-04 |
| 3.29  | 2.97  | 2.53   | 0.0103 | 0.0105 | 0.0109 | 1.87E-04 |
| 3.29  | 2.97  | 2.53   | 0.0103 | 0.0105 | 0.0109 | 1.87E-04 |
| 0.011 | 0.012 | 0.0117 | 2.08   | 2.58   | 2.67   | 1.87E-04 |
| 3.2   | 3.12  | 2.5    | 0.0103 | 0.0105 | 0.0109 | 1.88E-04 |
| 0.011 | 0.012 | 0.0117 | 2.89   | 3.39   | 3.76   | 1.89E-04 |
| 2.85  | 3.08  | 3.66   | 0.0103 | 0.0105 | 0.0109 | 1.89E-04 |
| 3.09  | 2.7   | 3.51   | 0.0103 | 0.0105 | 0.0109 | 1.90E-04 |
| 3.09  | 2.7   | 3.51   | 0.0103 | 0.0105 | 0.0109 | 1.90E-04 |
| 3.09  | 2.7   | 3.51   | 0.0103 | 0.0105 | 0.0109 | 1.90E-04 |
| 4.96  | 4.4   | 3.81   | 0.0103 | 0.0105 | 0.0109 | 1.91E-04 |
| 2.1   | 2.73  | 2.4    | 0.0103 | 0.0105 | 0.0109 | 1.91E-04 |
| 2.1   | 2.73  | 2.4    | 0.0103 | 0.0105 | 0.0109 | 1.91E-04 |
| 3.23  | 2.8   | 2.49   | 0.0103 | 0.0105 | 0.0109 | 1.91E-04 |
| 3.23  | 2.8   | 2.49   | 0.0103 | 0.0105 | 0.0109 | 1.91E-04 |
| 2.46  | 2.26  | 2.91   | 0.0103 | 0.0105 | 0.0109 | 1.92E-04 |
| 2.46  | 2.26  | 2.91   | 0.0103 | 0.0105 | 0.0109 | 1.92E-04 |
| 0.011 | 0.012 | 0.0117 | 2.6    | 3.25   | 2.62   | 1.92E-04 |
| 2.73  | 2.98  | 2.29   | 0.0103 | 0.0105 | 0.0109 | 1.92E-04 |
| 0.011 | 0.012 | 0.0117 | 2.73   | 2.52   | 2.1    | 1.92E-04 |
| 2.38  | 1.87  | 2.36   | 0.0103 | 0.0105 | 0.0109 | 1.93E-04 |

|       |       |        |        |        |        |          |
|-------|-------|--------|--------|--------|--------|----------|
| 3.22  | 3.06  | 2.49   | 0.0103 | 0.0105 | 0.0109 | 1.93E-04 |
| 2.09  | 2.5   | 2.72   | 0.0103 | 0.0105 | 0.0109 | 1.94E-04 |
| 2.77  | 3.22  | 3.61   | 0.0103 | 0.0105 | 0.0109 | 1.94E-04 |
| 2.66  | 2.49  | 3.19   | 0.0103 | 0.0105 | 0.0109 | 1.94E-04 |
| 0.011 | 0.012 | 0.0117 | 3.15   | 3.9    | 3.11   | 1.94E-04 |
| 4.4   | 3.63  | 4.72   | 0.0103 | 0.0105 | 0.0109 | 1.96E-04 |
| 4.4   | 3.63  | 4.72   | 0.0103 | 0.0105 | 0.0109 | 1.96E-04 |
| 0.011 | 0.012 | 0.0117 | 3.56   | 3.46   | 2.77   | 1.96E-04 |
| 3.08  | 2.93  | 2.38   | 0.0103 | 0.0105 | 0.0109 | 1.96E-04 |
| 3.64  | 3.24  | 2.79   | 0.0103 | 0.0105 | 0.0109 | 1.97E-04 |
| 3.64  | 3.24  | 2.79   | 0.0103 | 0.0105 | 0.0109 | 1.97E-04 |
| 3.64  | 3.24  | 2.79   | 0.0103 | 0.0105 | 0.0109 | 1.97E-04 |
| 2.76  | 3.6   | 3.28   | 0.0103 | 0.0105 | 0.0109 | 1.97E-04 |
| 0.011 | 0.012 | 0.0117 | 2.27   | 2.72   | 2.12   | 1.97E-04 |
| 3.06  | 2.47  | 3.19   | 0.0103 | 0.0105 | 0.0109 | 1.98E-04 |
| 2.48  | 2.1   | 1.92   | 0.0103 | 0.0105 | 0.0109 | 1.98E-04 |
| 2.13  | 2.71  | 2.7    | 0.0103 | 0.0105 | 0.0109 | 1.99E-04 |
| 3.08  | 2.39  | 2.59   | 0.0103 | 0.0105 | 0.0109 | 1.99E-04 |
| 3.08  | 2.39  | 2.59   | 0.0103 | 0.0105 | 0.0109 | 1.99E-04 |
| 2.85  | 2.47  | 2.19   | 0.0103 | 0.0105 | 0.0109 | 2.00E-04 |
| 5.41  | 4.85  | 4.14   | 0.0103 | 0.0105 | 0.0109 | 2.00E-04 |
| 5.41  | 4.85  | 4.14   | 0.0103 | 0.0105 | 0.0109 | 2.00E-04 |
| 3.07  | 3.64  | 4.01   | 0.0103 | 0.0105 | 0.0109 | 2.00E-04 |
| 0.011 | 0.012 | 0.0117 | 3.74   | 2.95   | 3.05   | 2.00E-04 |
| 2.12  | 2.64  | 2.11   | 0.0103 | 0.0105 | 0.0109 | 2.01E-04 |
| 0.011 | 0.012 | 0.0117 | 2.76   | 3.23   | 2.49   | 2.01E-04 |
| 0.011 | 0.012 | 0.0117 | 2.76   | 3.23   | 2.49   | 2.01E-04 |
| 3.35  | 3.61  | 2.77   | 0.0103 | 0.0105 | 0.0109 | 2.01E-04 |
| 3.74  | 3.68  | 2.92   | 0.0103 | 0.0105 | 0.0109 | 2.01E-04 |
| 3.19  | 2.62  | 3.41   | 0.0103 | 0.0105 | 0.0109 | 2.01E-04 |
| 3.94  | 3.14  | 3.17   | 0.0103 | 0.0105 | 0.0109 | 2.01E-04 |
| 3.94  | 3.14  | 3.17   | 0.0103 | 0.0105 | 0.0109 | 2.01E-04 |
| 0.011 | 0.012 | 0.0117 | 3.28   | 2.51   | 2.98   | 2.02E-04 |
| 0.011 | 0.012 | 0.0117 | 3.28   | 2.51   | 2.98   | 2.02E-04 |
| 2.82  | 2.85  | 2.23   | 0.0103 | 0.0105 | 0.0109 | 2.02E-04 |
| 2.82  | 2.85  | 2.23   | 0.0103 | 0.0105 | 0.0109 | 2.02E-04 |
| 2.17  | 2.64  | 2.07   | 0.0103 | 0.0105 | 0.0109 | 2.03E-04 |
| 3.4   | 4.4   | 3.72   | 0.0103 | 0.0105 | 0.0109 | 2.03E-04 |
| 3.4   | 4.4   | 3.72   | 0.0103 | 0.0105 | 0.0109 | 2.03E-04 |
| 1.97  | 2.46  | 2.54   | 0.0103 | 0.0105 | 0.0109 | 2.03E-04 |
| 1.97  | 2.46  | 2.54   | 0.0103 | 0.0105 | 0.0109 | 2.03E-04 |
| 2.68  | 3.45  | 2.88   | 0.0103 | 0.0105 | 0.0109 | 2.04E-04 |
| 4.09  | 3.14  | 3.53   | 0.0103 | 0.0105 | 0.0109 | 2.04E-04 |
| 4.09  | 3.14  | 3.53   | 0.0103 | 0.0105 | 0.0109 | 2.04E-04 |
| 4.09  | 3.14  | 3.53   | 0.0103 | 0.0105 | 0.0109 | 2.04E-04 |
| 2.63  | 2.55  | 2.04   | 0.0103 | 0.0105 | 0.0109 | 2.04E-04 |
| 2.63  | 2.55  | 2.04   | 0.0103 | 0.0105 | 0.0109 | 2.04E-04 |
| 2.63  | 2.55  | 2.04   | 0.0103 | 0.0105 | 0.0109 | 2.04E-04 |
| 0.011 | 0.012 | 0.0117 | 2.5    | 2.62   | 3.19   | 2.04E-04 |
| 2.88  | 2.36  | 2.26   | 0.0103 | 0.0105 | 0.0109 | 2.05E-04 |
| 2.86  | 3.03  | 2.33   | 0.0103 | 0.0105 | 0.0109 | 2.05E-04 |
| 2.86  | 3.03  | 2.33   | 0.0103 | 0.0105 | 0.0109 | 2.05E-04 |
| 2.3   | 2.08  | 2.7    | 0.0103 | 0.0105 | 0.0109 | 2.05E-04 |
| 2.81  | 2.91  | 3.57   | 0.0103 | 0.0105 | 0.0109 | 2.05E-04 |
| 2.62  | 3.38  | 2.83   | 0.0103 | 0.0105 | 0.0109 | 2.06E-04 |
| 2.62  | 3.38  | 2.83   | 0.0103 | 0.0105 | 0.0109 | 2.06E-04 |
| 4     | 3.18  | 4.09   | 0.0103 | 0.0105 | 0.0109 | 2.06E-04 |
| 4     | 3.18  | 4.09   | 0.0103 | 0.0105 | 0.0109 | 2.06E-04 |

|       |       |        |        |        |        |          |
|-------|-------|--------|--------|--------|--------|----------|
| 3.49  | 2.71  | 2.91   | 0.0103 | 0.0105 | 0.0109 | 2.06E-04 |
| 2.4   | 2.71  | 3.13   | 0.0103 | 0.0105 | 0.0109 | 2.06E-04 |
| 2.4   | 2.71  | 3.13   | 0.0103 | 0.0105 | 0.0109 | 2.06E-04 |
| 2.4   | 2.71  | 3.13   | 0.0103 | 0.0105 | 0.0109 | 2.06E-04 |
| 0.011 | 0.012 | 0.0117 | 2.63   | 3.43   | 3.2    | 2.06E-04 |
| 0.011 | 0.012 | 0.0117 | 3.4    | 3.47   | 2.7    | 2.06E-04 |
| 0.011 | 0.012 | 0.0117 | 3.4    | 3.47   | 2.7    | 2.06E-04 |
| 0.011 | 0.012 | 0.0117 | 3.46   | 2.65   | 3.01   | 2.07E-04 |
| 0.011 | 0.012 | 0.0117 | 3.46   | 2.65   | 3.01   | 2.07E-04 |
| 0.011 | 0.012 | 0.0117 | 2.35   | 3.03   | 2.53   | 2.08E-04 |
| 0.011 | 0.012 | 0.0117 | 2.58   | 3.37   | 2.93   | 2.08E-04 |
| 2.83  | 2.17  | 2.44   | 0.0103 | 0.0105 | 0.0109 | 2.09E-04 |
| 2.83  | 2.17  | 2.44   | 0.0103 | 0.0105 | 0.0109 | 2.09E-04 |
| 3.04  | 2.45  | 2.41   | 0.0103 | 0.0105 | 0.0109 | 2.10E-04 |
| 3.04  | 2.45  | 2.41   | 0.0103 | 0.0105 | 0.0109 | 2.10E-04 |
| 0.011 | 0.012 | 0.0117 | 3.12   | 2.72   | 3.56   | 2.10E-04 |
| 3.68  | 3.13  | 2.83   | 0.0103 | 0.0105 | 0.0109 | 2.10E-04 |
| 3.68  | 3.13  | 2.83   | 0.0103 | 0.0105 | 0.0109 | 2.10E-04 |
| 3.68  | 3.13  | 2.83   | 0.0103 | 0.0105 | 0.0109 | 2.10E-04 |
| 3.19  | 2.96  | 2.44   | 0.0103 | 0.0105 | 0.0109 | 2.11E-04 |
| 0.011 | 0.012 | 0.0117 | 2.76   | 2.26   | 2.95   | 2.11E-04 |
| 3.16  | 2.49  | 3.19   | 0.0103 | 0.0105 | 0.0109 | 2.11E-04 |
| 2.87  | 3.34  | 2.56   | 0.0103 | 0.0105 | 0.0109 | 2.12E-04 |
| 2.87  | 3.34  | 2.56   | 0.0103 | 0.0105 | 0.0109 | 2.12E-04 |
| 2.87  | 3.34  | 2.56   | 0.0103 | 0.0105 | 0.0109 | 2.12E-04 |
| 2.07  | 2.32  | 2.7    | 0.0103 | 0.0105 | 0.0109 | 2.12E-04 |
| 3.08  | 2.89  | 3.72   | 0.0103 | 0.0105 | 0.0109 | 2.13E-04 |
| 3.08  | 2.89  | 3.72   | 0.0103 | 0.0105 | 0.0109 | 2.13E-04 |
| 2.82  | 2.91  | 2.25   | 0.0103 | 0.0105 | 0.0109 | 2.13E-04 |
| 2.82  | 2.91  | 2.25   | 0.0103 | 0.0105 | 0.0109 | 2.13E-04 |
| 0.011 | 0.012 | 0.0117 | 2.9    | 3.42   | 2.63   | 2.13E-04 |
| 3.71  | 3.87  | 2.98   | 0.0103 | 0.0105 | 0.0109 | 2.14E-04 |
| 3.43  | 2.68  | 2.81   | 0.0103 | 0.0105 | 0.0109 | 2.14E-04 |
| 3.28  | 3.99  | 3.11   | 0.0103 | 0.0105 | 0.0109 | 2.15E-04 |
| 3.28  | 3.99  | 3.11   | 0.0103 | 0.0105 | 0.0109 | 2.15E-04 |
| 2.22  | 2.88  | 2.77   | 0.0103 | 0.0105 | 0.0109 | 2.15E-04 |
| 0.011 | 0.012 | 0.0117 | 3.04   | 2.35   | 2.95   | 2.16E-04 |
| 0.011 | 0.012 | 0.0117 | 3.04   | 2.35   | 2.95   | 2.16E-04 |
| 3.44  | 3.06  | 4      | 0.0103 | 0.0105 | 0.0109 | 2.16E-04 |
| 2.46  | 2.54  | 3.13   | 0.0103 | 0.0105 | 0.0109 | 2.16E-04 |
| 2.58  | 2.64  | 3.27   | 0.0103 | 0.0105 | 0.0109 | 2.16E-04 |
| 4.14  | 4.89  | 5.44   | 0.0103 | 0.0105 | 0.0109 | 2.16E-04 |
| 4.14  | 4.89  | 5.44   | 0.0103 | 0.0105 | 0.0109 | 2.16E-04 |
| 2.7   | 3.53  | 3.31   | 0.0103 | 0.0105 | 0.0109 | 2.17E-04 |
| 2.7   | 3.53  | 3.31   | 0.0103 | 0.0105 | 0.0109 | 2.17E-04 |
| 0.011 | 0.012 | 0.0117 | 2.16   | 2.72   | 2.79   | 2.17E-04 |
| 0.011 | 0.012 | 0.0117 | 2.16   | 2.72   | 2.79   | 2.17E-04 |
| 2.99  | 3.23  | 3.87   | 0.0103 | 0.0105 | 0.0109 | 2.17E-04 |
| 2.99  | 3.23  | 3.87   | 0.0103 | 0.0105 | 0.0109 | 2.17E-04 |
| 2.52  | 2.66  | 2.04   | 0.0103 | 0.0105 | 0.0109 | 2.17E-04 |
| 0.011 | 0.012 | 0.0117 | 4.31   | 4.77   | 3.63   | 2.17E-04 |
| 2.97  | 2.9   | 2.3    | 0.0103 | 0.0105 | 0.0109 | 2.17E-04 |
| 2.01  | 2.64  | 2.39   | 0.0103 | 0.0105 | 0.0109 | 2.18E-04 |
| 2.01  | 2.64  | 2.39   | 0.0103 | 0.0105 | 0.0109 | 2.18E-04 |
| 3.08  | 2.7   | 3.54   | 0.0103 | 0.0105 | 0.0109 | 2.18E-04 |
| 3.08  | 2.7   | 3.54   | 0.0103 | 0.0105 | 0.0109 | 2.18E-04 |
| 2.29  | 2.15  | 2.77   | 0.0103 | 0.0105 | 0.0109 | 2.18E-04 |
| 2.78  | 3.63  | 3.43   | 0.0103 | 0.0105 | 0.0109 | 2.19E-04 |



|       |       |        |        |        |        |          |
|-------|-------|--------|--------|--------|--------|----------|
| 2.78  | 3.63  | 3.43   | 0.0103 | 0.0105 | 0.0109 | 2.19E-04 |
| 2.53  | 3.18  | 2.54   | 0.0103 | 0.0105 | 0.0109 | 2.19E-04 |
| 0.011 | 0.012 | 0.0117 | 3.51   | 3.59   | 2.78   | 2.19E-04 |
| 0.011 | 0.012 | 0.0117 | 3.51   | 3.59   | 2.78   | 2.19E-04 |
| 2.72  | 2.6   | 2.09   | 0.0103 | 0.0105 | 0.0109 | 2.19E-04 |
| 2.72  | 2.6   | 2.09   | 0.0103 | 0.0105 | 0.0109 | 2.19E-04 |
| 2.66  | 2.4   | 3.13   | 0.0103 | 0.0105 | 0.0109 | 2.19E-04 |
| 2.66  | 2.4   | 3.13   | 0.0103 | 0.0105 | 0.0109 | 2.19E-04 |
| 3.18  | 2.43  | 2.98   | 0.0103 | 0.0105 | 0.0109 | 2.20E-04 |
| 3.97  | 3.05  | 3.35   | 0.0103 | 0.0105 | 0.0109 | 2.20E-04 |
| 4     | 3.05  | 3.47   | 0.0103 | 0.0105 | 0.0109 | 2.20E-04 |
| 2.41  | 2.12  | 2.78   | 0.0103 | 0.0105 | 0.0109 | 2.21E-04 |
| 0.011 | 0.012 | 0.0117 | 3.32   | 3.28   | 2.58   | 2.22E-04 |
| 3.52  | 2.77  | 2.84   | 0.0103 | 0.0105 | 0.0109 | 2.23E-04 |
| 3.52  | 2.77  | 2.84   | 0.0103 | 0.0105 | 0.0109 | 2.23E-04 |
| 0.011 | 0.012 | 0.0117 | 3.25   | 3.42   | 2.62   | 2.23E-04 |
| 0.011 | 0.012 | 0.0117 | 3.25   | 3.42   | 2.62   | 2.23E-04 |
| 0.011 | 0.012 | 0.0117 | 2.29   | 3.01   | 2.64   | 2.23E-04 |
| 3.22  | 3.62  | 2.75   | 0.0103 | 0.0105 | 0.0109 | 2.23E-04 |
| 2.52  | 3.17  | 3.27   | 0.0103 | 0.0105 | 0.0109 | 2.24E-04 |
| 0.011 | 0.012 | 0.0117 | 3.58   | 2.8    | 2.91   | 2.24E-04 |
| 4.29  | 4.49  | 4.52   | 3.15   | 3.01   | 3.26   | 2.24E-04 |
| 4.29  | 4.49  | 4.52   | 3.15   | 3.01   | 3.26   | 2.24E-04 |
| 0.011 | 0.012 | 0.0117 | 2.76   | 2.78   | 3.48   | 2.25E-04 |
| 3.8   | 3.22  | 2.91   | 0.0103 | 0.0105 | 0.0109 | 2.25E-04 |
| 3.8   | 3.22  | 2.91   | 0.0103 | 0.0105 | 0.0109 | 2.25E-04 |
| 3.82  | 2.9   | 3.4    | 0.0103 | 0.0105 | 0.0109 | 2.25E-04 |
| 3.82  | 2.9   | 3.4    | 0.0103 | 0.0105 | 0.0109 | 2.25E-04 |
| 3.4   | 3.19  | 4.12   | 0.0103 | 0.0105 | 0.0109 | 2.26E-04 |
| 0.011 | 0.012 | 0.0117 | 3.44   | 3.52   | 2.72   | 2.26E-04 |
| 3.24  | 2.48  | 3.08   | 0.0103 | 0.0105 | 0.0109 | 2.26E-04 |
| 3.24  | 2.48  | 3.08   | 0.0103 | 0.0105 | 0.0109 | 2.26E-04 |
| 0.011 | 0.012 | 0.0117 | 3.34   | 2.56   | 3.19   | 2.26E-04 |
| 0.011 | 0.012 | 0.0117 | 3.34   | 2.56   | 3.19   | 2.26E-04 |
| 3.11  | 2.68  | 2.37   | 0.0103 | 0.0105 | 0.0109 | 2.26E-04 |
| 2.06  | 2.6   | 2.67   | 0.0103 | 0.0105 | 0.0109 | 2.27E-04 |
| 2.06  | 2.6   | 2.67   | 0.0103 | 0.0105 | 0.0109 | 2.27E-04 |
| 3.26  | 2.51  | 2.72   | 0.0103 | 0.0105 | 0.0109 | 2.27E-04 |
| 3.27  | 2.56  | 2.65   | 0.0103 | 0.0105 | 0.0109 | 2.27E-04 |
| 2.58  | 3.02  | 3.4    | 0.0103 | 0.0105 | 0.0109 | 2.27E-04 |
| 3.77  | 3.68  | 2.91   | 0.0103 | 0.0105 | 0.0109 | 2.27E-04 |
| 3.77  | 3.68  | 2.91   | 0.0103 | 0.0105 | 0.0109 | 2.27E-04 |
| 3.38  | 2.59  | 2.85   | 0.0103 | 0.0105 | 0.0109 | 2.28E-04 |
| 3.76  | 3.83  | 3.63   | 2.75   | 2.87   | 2.88   | 2.28E-04 |
| 3.2   | 4.17  | 3.5    | 0.0103 | 0.0105 | 0.0109 | 2.28E-04 |
| 2.89  | 2.22  | 2.42   | 0.0103 | 0.0105 | 0.0109 | 2.29E-04 |
| 2.95  | 2.65  | 3.47   | 0.0103 | 0.0105 | 0.0109 | 2.30E-04 |
| 0.011 | 0.012 | 0.0117 | 3.69   | 2.8    | 3.23   | 2.31E-04 |
| 0.011 | 0.012 | 0.0117 | 3.69   | 2.8    | 3.23   | 2.31E-04 |
| 0.011 | 0.012 | 0.0117 | 3.19   | 2.44   | 3.04   | 2.31E-04 |
| 2.54  | 2.16  | 2.85   | 0.0103 | 0.0105 | 0.0109 | 2.31E-04 |
| 2.54  | 2.16  | 2.85   | 0.0103 | 0.0105 | 0.0109 | 2.31E-04 |
| 3.31  | 2.91  | 2.51   | 0.0103 | 0.0105 | 0.0109 | 2.32E-04 |
| 3.31  | 2.91  | 2.51   | 0.0103 | 0.0105 | 0.0109 | 2.32E-04 |
| 3.57  | 2.77  | 2.92   | 0.0103 | 0.0105 | 0.0109 | 2.33E-04 |
| 3.62  | 2.89  | 2.86   | 0.0103 | 0.0105 | 0.0109 | 2.34E-04 |
| 3.15  | 3.59  | 2.72   | 0.0103 | 0.0105 | 0.0109 | 2.35E-04 |
| 2.3   | 2.12  | 2.76   | 0.0103 | 0.0105 | 0.0109 | 2.35E-04 |

|       |       |        |        |        |        |          |
|-------|-------|--------|--------|--------|--------|----------|
| 2.3   | 2.12  | 2.76   | 0.0103 | 0.0105 | 0.0109 | 2.35E-04 |
| 0.011 | 0.012 | 0.0117 | 2.9    | 2.56   | 3.37   | 2.37E-04 |
| 0.011 | 0.012 | 0.0117 | 2.9    | 2.56   | 3.37   | 2.37E-04 |
| 2.84  | 3.43  | 2.64   | 0.0103 | 0.0105 | 0.0109 | 2.37E-04 |
| 2.84  | 3.43  | 2.64   | 0.0103 | 0.0105 | 0.0109 | 2.37E-04 |
| 0.011 | 0.012 | 0.0117 | 2.45   | 2.75   | 2.08   | 2.38E-04 |
| 0.011 | 0.012 | 0.0117 | 2.4    | 3.09   | 3.08   | 2.39E-04 |
| 3.06  | 2.92  | 3.76   | 0.0103 | 0.0105 | 0.0109 | 2.39E-04 |
| 2     | 2.52  | 2.61   | 0.0103 | 0.0105 | 0.0109 | 2.40E-04 |
| 2.8   | 2.71  | 3.47   | 0.0103 | 0.0105 | 0.0109 | 2.40E-04 |
| 2.8   | 2.71  | 3.47   | 0.0103 | 0.0105 | 0.0109 | 2.40E-04 |
| 2.47  | 2.98  | 2.29   | 0.0103 | 0.0105 | 0.0109 | 2.41E-04 |
| 2.47  | 2.98  | 2.29   | 0.0103 | 0.0105 | 0.0109 | 2.41E-04 |
| 0.011 | 0.012 | 0.0117 | 3.41   | 3.58   | 2.73   | 2.41E-04 |
| 0.011 | 0.012 | 0.0117 | 2.47   | 3.03   | 2.35   | 2.41E-04 |
| 0.011 | 0.012 | 0.0117 | 2.47   | 3.03   | 2.35   | 2.41E-04 |
| 2.79  | 3.42  | 2.65   | 0.0103 | 0.0105 | 0.0109 | 2.41E-04 |
| 2.79  | 3.42  | 2.65   | 0.0103 | 0.0105 | 0.0109 | 2.41E-04 |
| 2.95  | 2.46  | 2.26   | 0.0103 | 0.0105 | 0.0109 | 2.41E-04 |
| 2.95  | 2.46  | 2.26   | 0.0103 | 0.0105 | 0.0109 | 2.41E-04 |
| 3.72  | 4.59  | 3.57   | 0.0103 | 0.0105 | 0.0109 | 2.42E-04 |
| 2.9   | 3.84  | 3.45   | 0.0103 | 0.0105 | 0.0109 | 2.42E-04 |
| 3.24  | 3.16  | 2.49   | 0.0103 | 0.0105 | 0.0109 | 2.42E-04 |
| 3     | 3.42  | 3.96   | 0.0103 | 0.0105 | 0.0109 | 2.42E-04 |
| 3     | 3.42  | 3.96   | 0.0103 | 0.0105 | 0.0109 | 2.42E-04 |
| 3.18  | 2.54  | 3.33   | 0.0103 | 0.0105 | 0.0109 | 2.42E-04 |
| 3.08  | 3.69  | 4.08   | 0.0103 | 0.0105 | 0.0109 | 2.44E-04 |
| 3.08  | 3.69  | 4.08   | 0.0103 | 0.0105 | 0.0109 | 2.44E-04 |
| 3.02  | 2.37  | 3.08   | 0.0103 | 0.0105 | 0.0109 | 2.45E-04 |
| 3.01  | 2.36  | 2.41   | 0.0103 | 0.0105 | 0.0109 | 2.46E-04 |
| 2.56  | 3.39  | 2.97   | 0.0103 | 0.0105 | 0.0109 | 2.46E-04 |
| 2.56  | 3.39  | 2.97   | 0.0103 | 0.0105 | 0.0109 | 2.46E-04 |
| 5.15  | 4.86  | 3.91   | 0.0103 | 0.0105 | 0.0109 | 2.46E-04 |
| 0.011 | 0.012 | 0.0117 | 2.7    | 2.56   | 3.31   | 2.46E-04 |
| 0.011 | 0.012 | 0.0117 | 2.7    | 2.56   | 3.31   | 2.46E-04 |
| 3.59  | 2.75  | 2.98   | 0.0103 | 0.0105 | 0.0109 | 2.47E-04 |
| 3.54  | 2.9   | 2.73   | 0.0103 | 0.0105 | 0.0109 | 2.47E-04 |
| 0.011 | 0.012 | 0.0117 | 2.26   | 2.6    | 2.99   | 2.47E-04 |
| 2.92  | 3.87  | 3.52   | 0.0103 | 0.0105 | 0.0109 | 2.47E-04 |
| 2.4   | 2.65  | 3.15   | 0.0103 | 0.0105 | 0.0109 | 2.47E-04 |
| 2.4   | 2.65  | 3.15   | 0.0103 | 0.0105 | 0.0109 | 2.47E-04 |
| 3.31  | 2.79  | 2.52   | 0.0103 | 0.0105 | 0.0109 | 2.47E-04 |
| 3.31  | 2.79  | 2.52   | 0.0103 | 0.0105 | 0.0109 | 2.47E-04 |
| 5.11  | 4.09  | 4      | 0.0103 | 0.0105 | 0.0109 | 2.48E-04 |
| 0.011 | 0.012 | 0.0117 | 2.88   | 2.38   | 2.21   | 2.49E-04 |
| 2.84  | 3.07  | 2.32   | 0.0103 | 0.0105 | 0.0109 | 2.49E-04 |
| 2.84  | 3.07  | 2.32   | 0.0103 | 0.0105 | 0.0109 | 2.49E-04 |
| 2.71  | 3.59  | 3.3    | 0.0103 | 0.0105 | 0.0109 | 2.49E-04 |
| 3.65  | 2.75  | 3.27   | 0.0103 | 0.0105 | 0.0109 | 2.50E-04 |
| 3.08  | 2.65  | 2.33   | 0.0103 | 0.0105 | 0.0109 | 2.50E-04 |
| 3.08  | 2.65  | 2.33   | 0.0103 | 0.0105 | 0.0109 | 2.50E-04 |
| 3.38  | 2.65  | 2.7    | 0.0103 | 0.0105 | 0.0109 | 2.50E-04 |
| 2.7   | 2.52  | 3.28   | 0.0103 | 0.0105 | 0.0109 | 2.50E-04 |
| 2.7   | 2.52  | 3.28   | 0.0103 | 0.0105 | 0.0109 | 2.50E-04 |
| 3.23  | 4.28  | 3.72   | 0.0103 | 0.0105 | 0.0109 | 2.51E-04 |
| 0.011 | 0.012 | 0.0117 | 4.21   | 3.24   | 3.45   | 2.52E-04 |
| 0.011 | 0.012 | 0.0117 | 4.21   | 3.24   | 3.45   | 2.52E-04 |
| 2.99  | 2.53  | 3.36   | 0.0103 | 0.0105 | 0.0109 | 2.52E-04 |

|       |       |        |        |        |        |          |
|-------|-------|--------|--------|--------|--------|----------|
| 2.99  | 2.53  | 3.36   | 0.0103 | 0.0105 | 0.0109 | 2.52E-04 |
| 2.99  | 2.53  | 3.36   | 0.0103 | 0.0105 | 0.0109 | 2.52E-04 |
| 3.8   | 2.95  | 3.07   | 0.0103 | 0.0105 | 0.0109 | 2.52E-04 |
| 3.6   | 2.97  | 2.76   | 0.0103 | 0.0105 | 0.0109 | 2.53E-04 |
| 3.6   | 2.97  | 2.76   | 0.0103 | 0.0105 | 0.0109 | 2.53E-04 |
| 2.19  | 2.77  | 2.19   | 0.0103 | 0.0105 | 0.0109 | 2.53E-04 |
| 3.96  | 3.14  | 3.12   | 0.0103 | 0.0105 | 0.0109 | 2.53E-04 |
| 3.96  | 3.14  | 3.12   | 0.0103 | 0.0105 | 0.0109 | 2.53E-04 |
| 3.96  | 3.14  | 3.12   | 0.0103 | 0.0105 | 0.0109 | 2.53E-04 |
| 0.011 | 0.012 | 0.0117 | 2.47   | 2.63   | 3.21   | 2.53E-04 |
| 0.011 | 0.012 | 0.0117 | 2.47   | 2.63   | 3.21   | 2.53E-04 |
| 2.66  | 3.23  | 3.53   | 0.0103 | 0.0105 | 0.0109 | 2.54E-04 |
| 2.45  | 2.8   | 2.11   | 0.0103 | 0.0105 | 0.0109 | 2.54E-04 |
| 2.45  | 2.8   | 2.11   | 0.0103 | 0.0105 | 0.0109 | 2.54E-04 |
| 3.39  | 2.61  | 3.35   | 0.0103 | 0.0105 | 0.0109 | 2.55E-04 |
| 3.14  | 2.38  | 2.97   | 0.0103 | 0.0105 | 0.0109 | 2.56E-04 |
| 2.94  | 2.31  | 3.02   | 0.0103 | 0.0105 | 0.0109 | 2.57E-04 |
| 3.22  | 2.49  | 2.61   | 0.0103 | 0.0105 | 0.0109 | 2.57E-04 |
| 3.22  | 2.49  | 2.61   | 0.0103 | 0.0105 | 0.0109 | 2.57E-04 |
| 2.66  | 2.03  | 2.21   | 0.0103 | 0.0105 | 0.0109 | 2.57E-04 |
| 2.66  | 2.03  | 2.21   | 0.0103 | 0.0105 | 0.0109 | 2.57E-04 |
| 0.011 | 0.012 | 0.0117 | 3.12   | 2.55   | 2.4    | 2.58E-04 |
| 2.02  | 2.64  | 2.18   | 0.0103 | 0.0105 | 0.0109 | 2.58E-04 |
| 2.02  | 2.64  | 2.18   | 0.0103 | 0.0105 | 0.0109 | 2.58E-04 |
| 0.011 | 0.012 | 0.0117 | 2.89   | 3.03   | 3.74   | 2.60E-04 |
| 0.011 | 0.012 | 0.0117 | 4.12   | 3.36   | 3.17   | 2.60E-04 |
| 0.011 | 0.012 | 0.0117 | 4.12   | 3.36   | 3.17   | 2.60E-04 |
| 0.011 | 0.012 | 0.0117 | 4.12   | 3.36   | 3.17   | 2.60E-04 |
| 2.26  | 2.34  | 2.91   | 0.0103 | 0.0105 | 0.0109 | 2.61E-04 |
| 2.3   | 2.69  | 3.06   | 0.0103 | 0.0105 | 0.0109 | 2.61E-04 |
| 2.3   | 2.69  | 3.06   | 0.0103 | 0.0105 | 0.0109 | 2.61E-04 |
| 0.011 | 0.012 | 0.0117 | 2.32   | 3.01   | 2.99   | 2.61E-04 |
| 0.011 | 0.012 | 0.0117 | 2.66   | 2.06   | 2.67   | 2.63E-04 |
| 2.93  | 2.27  | 2.36   | 0.0103 | 0.0105 | 0.0109 | 2.64E-04 |
| 2.93  | 2.27  | 2.36   | 0.0103 | 0.0105 | 0.0109 | 2.64E-04 |
| 2.56  | 2.55  | 3.24   | 0.0103 | 0.0105 | 0.0109 | 2.64E-04 |
| 2.56  | 2.55  | 3.24   | 0.0103 | 0.0105 | 0.0109 | 2.64E-04 |
| 0.011 | 0.012 | 0.0117 | 3.57   | 3.93   | 2.95   | 2.65E-04 |
| 0.011 | 0.012 | 0.0117 | 3.57   | 3.93   | 2.95   | 2.65E-04 |
| 2.32  | 2.93  | 2.3    | 0.0103 | 0.0105 | 0.0109 | 2.66E-04 |
| 0.011 | 0.012 | 0.0117 | 3.24   | 2.78   | 2.44   | 2.66E-04 |
| 3.83  | 4.42  | 3.32   | 0.0103 | 0.0105 | 0.0109 | 2.67E-04 |
| 3.83  | 4.42  | 3.32   | 0.0103 | 0.0105 | 0.0109 | 2.67E-04 |
| 3.4   | 2.65  | 2.71   | 0.0103 | 0.0105 | 0.0109 | 2.68E-04 |
| 2.22  | 2.53  | 2.95   | 0.0103 | 0.0105 | 0.0109 | 2.69E-04 |
| 0.011 | 0.012 | 0.0117 | 2.35   | 3.1    | 2.97   | 2.69E-04 |
| 0.011 | 0.012 | 0.0117 | 2.39   | 2.31   | 2.98   | 2.71E-04 |
| 4.49  | 4.92  | 4.44   | 2.38   | 2.06   | 2.44   | 2.71E-04 |
| 0.011 | 0.012 | 0.0117 | 3.97   | 3.14   | 3.11   | 2.72E-04 |
| 3.04  | 2.94  | 2.31   | 0.0103 | 0.0105 | 0.0109 | 2.72E-04 |
| 3.81  | 3.17  | 2.89   | 0.0103 | 0.0105 | 0.0109 | 2.72E-04 |
| 3.81  | 3.17  | 2.89   | 0.0103 | 0.0105 | 0.0109 | 2.72E-04 |
| 3.07  | 3.58  | 2.69   | 0.0103 | 0.0105 | 0.0109 | 2.73E-04 |
| 3.43  | 3.3   | 2.6    | 0.0103 | 0.0105 | 0.0109 | 2.74E-04 |
| 0.011 | 0.012 | 0.0117 | 3.05   | 3.97   | 3.95   | 2.75E-04 |
| 0.011 | 0.012 | 0.0117 | 2.14   | 2.83   | 2.37   | 2.76E-04 |
| 3.01  | 2.26  | 2.58   | 0.0103 | 0.0105 | 0.0109 | 2.77E-04 |
| 4     | 4.14  | 3.14   | 0.0103 | 0.0105 | 0.0109 | 2.77E-04 |

|       |       |        |        |        |        |          |
|-------|-------|--------|--------|--------|--------|----------|
| 4     | 4.14  | 3.14   | 0.0103 | 0.0105 | 0.0109 | 2.77E-04 |
| 3.29  | 3.74  | 4.38   | 0.0103 | 0.0105 | 0.0109 | 2.77E-04 |
| 3.84  | 3.13  | 4.18   | 0.0103 | 0.0105 | 0.0109 | 2.78E-04 |
| 3.84  | 3.13  | 4.18   | 0.0103 | 0.0105 | 0.0109 | 2.78E-04 |
| 3.84  | 3.13  | 4.18   | 0.0103 | 0.0105 | 0.0109 | 2.78E-04 |
| 3.84  | 3.13  | 4.18   | 0.0103 | 0.0105 | 0.0109 | 2.78E-04 |
| 0.011 | 0.012 | 0.0117 | 3.05   | 2.97   | 2.32   | 2.79E-04 |
| 3.57  | 4.16  | 3.12   | 0.0103 | 0.0105 | 0.0109 | 2.79E-04 |
| 3.52  | 2.63  | 3.15   | 0.0103 | 0.0105 | 0.0109 | 2.79E-04 |
| 3.52  | 2.63  | 3.15   | 0.0103 | 0.0105 | 0.0109 | 2.79E-04 |
| 2.85  | 2.18  | 2.32   | 0.0103 | 0.0105 | 0.0109 | 2.80E-04 |
| 2.09  | 2.74  | 2.69   | 0.0103 | 0.0105 | 0.0109 | 2.81E-04 |
| 0.011 | 0.012 | 0.0117 | 2.6    | 3.05   | 2.29   | 2.82E-04 |
| 3.27  | 2.9   | 2.44   | 0.0103 | 0.0105 | 0.0109 | 2.85E-04 |
| 2.41  | 2.68  | 2      | 0.0103 | 0.0105 | 0.0109 | 2.85E-04 |
| 2.41  | 2.68  | 2      | 0.0103 | 0.0105 | 0.0109 | 2.85E-04 |
| 3.91  | 2.92  | 3.4    | 0.0103 | 0.0105 | 0.0109 | 2.86E-04 |
| 0.011 | 0.012 | 0.0117 | 2.82   | 2.92   | 2.21   | 2.86E-04 |
| 0.011 | 0.012 | 0.0117 | 2.82   | 2.92   | 2.21   | 2.86E-04 |
| 2.73  | 2.22  | 2.97   | 0.0103 | 0.0105 | 0.0109 | 2.86E-04 |
| 3.92  | 2.94  | 3.68   | 0.0103 | 0.0105 | 0.0109 | 2.88E-04 |
| 2.85  | 2.31  | 3.09   | 0.0103 | 0.0105 | 0.0109 | 2.88E-04 |
| 0.011 | 0.012 | 0.0117 | 2.41   | 2.97   | 2.27   | 2.88E-04 |
| 2.54  | 3.13  | 3.4    | 0.0103 | 0.0105 | 0.0109 | 2.89E-04 |
| 0.011 | 0.012 | 0.0117 | 3.43   | 2.59   | 3.3    | 2.90E-04 |
| 2.49  | 2.31  | 3.04   | 0.0103 | 0.0105 | 0.0109 | 2.90E-04 |
| 2.49  | 2.31  | 3.04   | 0.0103 | 0.0105 | 0.0109 | 2.90E-04 |
| 2.21  | 2.51  | 2.95   | 0.0103 | 0.0105 | 0.0109 | 2.91E-04 |
| 0.011 | 0.012 | 0.0117 | 2.99   | 2.29   | 2.98   | 2.92E-04 |
| 2.29  | 3.07  | 2.81   | 0.0103 | 0.0105 | 0.0109 | 2.92E-04 |
| 2.29  | 3.07  | 2.81   | 0.0103 | 0.0105 | 0.0109 | 2.92E-04 |
| 3.51  | 3.99  | 2.97   | 0.0103 | 0.0105 | 0.0109 | 2.94E-04 |
| 3.09  | 2.5   | 3.35   | 0.0103 | 0.0105 | 0.0109 | 2.94E-04 |
| 2.7   | 3.07  | 3.61   | 0.0103 | 0.0105 | 0.0109 | 2.96E-04 |
| 2.7   | 3.07  | 3.61   | 0.0103 | 0.0105 | 0.0109 | 2.96E-04 |
| 2.04  | 2.23  | 2.7    | 0.0103 | 0.0105 | 0.0109 | 2.96E-04 |
| 2.04  | 2.23  | 2.7    | 0.0103 | 0.0105 | 0.0109 | 2.96E-04 |
| 2.67  | 2.72  | 3.44   | 0.0103 | 0.0105 | 0.0109 | 2.96E-04 |
| 2.67  | 2.72  | 3.44   | 0.0103 | 0.0105 | 0.0109 | 2.96E-04 |
| 3.79  | 2.88  | 3.09   | 0.0103 | 0.0105 | 0.0109 | 2.96E-04 |
| 3.79  | 2.88  | 3.09   | 0.0103 | 0.0105 | 0.0109 | 2.96E-04 |
| 0.011 | 0.012 | 0.0117 | 2.53   | 2.85   | 2.12   | 2.97E-04 |
| 2.88  | 2.25  | 2.26   | 0.0103 | 0.0105 | 0.0109 | 2.98E-04 |
| 2.88  | 2.25  | 2.26   | 0.0103 | 0.0105 | 0.0109 | 2.98E-04 |
| 3.58  | 4.7   | 3.81   | 0.0103 | 0.0105 | 0.0109 | 2.98E-04 |
| 2.34  | 3.08  | 2.51   | 0.0103 | 0.0105 | 0.0109 | 2.99E-04 |
| 2.34  | 3.08  | 2.51   | 0.0103 | 0.0105 | 0.0109 | 2.99E-04 |
| 2.39  | 3.21  | 2.94   | 0.0103 | 0.0105 | 0.0109 | 3.00E-04 |
| 0.011 | 0.012 | 0.0117 | 2.44   | 2.33   | 3.04   | 3.00E-04 |
| 3.51  | 2.95  | 2.63   | 0.0103 | 0.0105 | 0.0109 | 3.01E-04 |
| 3.51  | 2.95  | 2.63   | 0.0103 | 0.0105 | 0.0109 | 3.01E-04 |
| 3.36  | 2.67  | 3.57   | 0.0103 | 0.0105 | 0.0109 | 3.02E-04 |
| 3.36  | 2.67  | 3.57   | 0.0103 | 0.0105 | 0.0109 | 3.02E-04 |
| 3.36  | 2.67  | 3.57   | 0.0103 | 0.0105 | 0.0109 | 3.02E-04 |
| 2.76  | 3.56  | 2.81   | 0.0103 | 0.0105 | 0.0109 | 3.03E-04 |
| 2.76  | 3.56  | 2.81   | 0.0103 | 0.0105 | 0.0109 | 3.03E-04 |
| 0.011 | 0.012 | 0.0117 | 4.18   | 3.48   | 3.14   | 3.03E-04 |
| 0.011 | 0.012 | 0.0117 | 3.04   | 3.1    | 2.35   | 3.04E-04 |

|       |       |        |        |        |        |          |
|-------|-------|--------|--------|--------|--------|----------|
| 2.84  | 2.11  | 2.58   | 0.0103 | 0.0105 | 0.0109 | 3.05E-04 |
| 3.22  | 2.83  | 2.39   | 0.0103 | 0.0105 | 0.0109 | 3.06E-04 |
| 3.23  | 3.12  | 3.02   | 2.36   | 2.39   | 2.3    | 3.06E-04 |
| 2.47  | 3.33  | 2.98   | 0.0103 | 0.0105 | 0.0109 | 3.07E-04 |
| 2.47  | 3.33  | 2.98   | 0.0103 | 0.0105 | 0.0109 | 3.07E-04 |
| 3.46  | 2.62  | 2.82   | 0.0103 | 0.0105 | 0.0109 | 3.08E-04 |
| 3.46  | 2.62  | 2.82   | 0.0103 | 0.0105 | 0.0109 | 3.08E-04 |
| 0.011 | 0.012 | 0.0117 | 2.63   | 2.85   | 2.12   | 3.09E-04 |
| 0.011 | 0.012 | 0.0117 | 2.92   | 2.99   | 2.26   | 3.09E-04 |
| 0.011 | 0.012 | 0.0117 | 4.32   | 5.77   | 4.82   | 3.09E-04 |
| 2.28  | 2.99  | 2.98   | 0.0103 | 0.0105 | 0.0109 | 3.10E-04 |
| 3     | 2.47  | 2.26   | 0.0103 | 0.0105 | 0.0109 | 3.10E-04 |
| 3     | 2.47  | 2.26   | 0.0103 | 0.0105 | 0.0109 | 3.10E-04 |
| 3.24  | 2.82  | 3.79   | 0.0103 | 0.0105 | 0.0109 | 3.10E-04 |
| 2.34  | 2.33  | 2.99   | 0.0103 | 0.0105 | 0.0109 | 3.11E-04 |
| 2.34  | 2.33  | 2.99   | 0.0103 | 0.0105 | 0.0109 | 3.11E-04 |
| 2.92  | 2.22  | 2.36   | 0.0103 | 0.0105 | 0.0109 | 3.11E-04 |
| 2.41  | 3.15  | 2.52   | 0.0103 | 0.0105 | 0.0109 | 3.12E-04 |
| 2.41  | 3.15  | 2.52   | 0.0103 | 0.0105 | 0.0109 | 3.12E-04 |
| 2.5   | 2.73  | 3.32   | 0.0103 | 0.0105 | 0.0109 | 3.13E-04 |
| 2.5   | 2.73  | 3.32   | 0.0103 | 0.0105 | 0.0109 | 3.13E-04 |
| 3.66  | 2.89  | 3.87   | 0.0103 | 0.0105 | 0.0109 | 3.13E-04 |
| 3.66  | 2.89  | 3.87   | 0.0103 | 0.0105 | 0.0109 | 3.13E-04 |
| 3.66  | 2.89  | 3.87   | 0.0103 | 0.0105 | 0.0109 | 3.13E-04 |
| 0.011 | 0.012 | 0.0117 | 2.81   | 2.22   | 2.17   | 3.13E-04 |
| 2.15  | 2.39  | 2.87   | 0.0103 | 0.0105 | 0.0109 | 3.13E-04 |
| 2.15  | 2.39  | 2.87   | 0.0103 | 0.0105 | 0.0109 | 3.13E-04 |
| 0.011 | 0.012 | 0.0117 | 3.06   | 3.14   | 3.97   | 3.14E-04 |
| 0.011 | 0.012 | 0.0117 | 3.06   | 3.14   | 3.97   | 3.14E-04 |
| 2.55  | 2.85  | 3.41   | 0.0103 | 0.0105 | 0.0109 | 3.14E-04 |
| 2.55  | 2.85  | 3.41   | 0.0103 | 0.0105 | 0.0109 | 3.14E-04 |
| 0.011 | 0.012 | 0.0117 | 2.53   | 3.17   | 3.4    | 3.15E-04 |
| 3.02  | 3.89  | 3.05   | 0.0103 | 0.0105 | 0.0109 | 3.15E-04 |
| 3.02  | 3.89  | 3.05   | 0.0103 | 0.0105 | 0.0109 | 3.15E-04 |
| 0.011 | 0.012 | 0.0117 | 3.4    | 4.59   | 4.17   | 3.16E-04 |
| 3.35  | 3.31  | 2.54   | 0.0103 | 0.0105 | 0.0109 | 3.16E-04 |
| 3.35  | 3.31  | 2.54   | 0.0103 | 0.0105 | 0.0109 | 3.16E-04 |
| 2.67  | 2.22  | 3      | 0.0103 | 0.0105 | 0.0109 | 3.17E-04 |
| 2.71  | 2.01  | 2.49   | 0.0103 | 0.0105 | 0.0109 | 3.18E-04 |
| 0.011 | 0.012 | 0.0117 | 3.99   | 3.2    | 3.04   | 3.18E-04 |
| 0.011 | 0.012 | 0.0117 | 3.99   | 3.2    | 3.04   | 3.18E-04 |
| 2.65  | 2.03  | 2.11   | 0.0103 | 0.0105 | 0.0109 | 3.19E-04 |
| 2.15  | 2.77  | 2.17   | 0.0103 | 0.0105 | 0.0109 | 3.19E-04 |
| 2.17  | 2.68  | 2.03   | 0.0103 | 0.0105 | 0.0109 | 3.20E-04 |
| 0.011 | 0.012 | 0.0117 | 2.73   | 2.16   | 2.1    | 3.21E-04 |
| 0.011 | 0.012 | 0.0117 | 2.85   | 2.15   | 2.79   | 3.22E-04 |
| 0.011 | 0.012 | 0.0117 | 2.85   | 2.15   | 2.79   | 3.22E-04 |
| 0.011 | 0.012 | 0.0117 | 3.69   | 3.36   | 2.73   | 3.23E-04 |
| 0.011 | 0.012 | 0.0117 | 2.8    | 3.76   | 3.16   | 3.23E-04 |
| 2.6   | 2.3   | 3.09   | 0.0103 | 0.0105 | 0.0109 | 3.24E-04 |
| 2.6   | 2.3   | 3.09   | 0.0103 | 0.0105 | 0.0109 | 3.24E-04 |
| 0.011 | 0.012 | 0.0117 | 3.28   | 3.71   | 2.74   | 3.25E-04 |
| 0.011 | 0.012 | 0.0117 | 3.28   | 3.71   | 2.74   | 3.25E-04 |
| 3.59  | 2.69  | 2.95   | 0.0103 | 0.0105 | 0.0109 | 3.30E-04 |
| 3.59  | 2.69  | 2.95   | 0.0103 | 0.0105 | 0.0109 | 3.30E-04 |
| 0.011 | 0.012 | 0.0117 | 3.81   | 3.96   | 2.96   | 3.32E-04 |
| 0.011 | 0.012 | 0.0117 | 3.81   | 3.96   | 2.96   | 3.32E-04 |
| 0.011 | 0.012 | 0.0117 | 3.27   | 3.59   | 2.65   | 3.32E-04 |

|       |       |        |        |        |        |          |
|-------|-------|--------|--------|--------|--------|----------|
| 3.16  | 2.5   | 2.42   | 0.0103 | 0.0105 | 0.0109 | 3.33E-04 |
| 3.22  | 3.49  | 2.58   | 0.0103 | 0.0105 | 0.0109 | 3.33E-04 |
| 3.22  | 3.49  | 2.58   | 0.0103 | 0.0105 | 0.0109 | 3.33E-04 |
| 0.011 | 0.012 | 0.0117 | 4.1    | 3.05   | 3.89   | 3.34E-04 |
| 3.27  | 4.35  | 3.54   | 0.0103 | 0.0105 | 0.0109 | 3.34E-04 |
| 5.34  | 4.33  | 4.02   | 0.0103 | 0.0105 | 0.0109 | 3.35E-04 |
| 3.91  | 2.95  | 3.86   | 0.0103 | 0.0105 | 0.0109 | 3.36E-04 |
| 3.42  | 2.52  | 3.1    | 0.0103 | 0.0105 | 0.0109 | 3.38E-04 |
| 2.47  | 3.26  | 3.25   | 0.0103 | 0.0105 | 0.0109 | 3.38E-04 |
| 0.011 | 0.012 | 0.0117 | 2.39   | 3.24   | 2.79   | 3.40E-04 |
| 0.011 | 0.012 | 0.0117 | 2.39   | 3.24   | 2.79   | 3.40E-04 |
| 2.95  | 3.97  | 3.31   | 0.0103 | 0.0105 | 0.0109 | 3.40E-04 |
| 2     | 2.66  | 2.61   | 0.0103 | 0.0105 | 0.0109 | 3.41E-04 |
| 3.62  | 3.05  | 2.68   | 0.0103 | 0.0105 | 0.0109 | 3.42E-04 |
| 4.08  | 3.03  | 3.4    | 0.0103 | 0.0105 | 0.0109 | 3.42E-04 |
| 2.38  | 2.93  | 2.2    | 0.0103 | 0.0105 | 0.0109 | 3.43E-04 |
| 0.011 | 0.012 | 0.0117 | 2.45   | 2.89   | 3.33   | 3.46E-04 |
| 0.011 | 0.012 | 0.0117 | 2.83   | 2.49   | 2.08   | 3.47E-04 |
| 3.17  | 2.37  | 3.08   | 0.0103 | 0.0105 | 0.0109 | 3.48E-04 |
| 3.24  | 3.41  | 2.53   | 0.0103 | 0.0105 | 0.0109 | 3.48E-04 |
| 2.84  | 2.15  | 2.84   | 0.0103 | 0.0105 | 0.0109 | 3.49E-04 |
| 3.61  | 2.65  | 3.23   | 0.0103 | 0.0105 | 0.0109 | 3.50E-04 |
| 3.61  | 2.65  | 3.23   | 0.0103 | 0.0105 | 0.0109 | 3.50E-04 |
| 4.33  | 3.64  | 3.2    | 0.0103 | 0.0105 | 0.0109 | 3.51E-04 |
| 4.33  | 3.64  | 3.2    | 0.0103 | 0.0105 | 0.0109 | 3.51E-04 |
| 0.011 | 0.012 | 0.0117 | 2.18   | 2.92   | 2.83   | 3.51E-04 |
| 3.09  | 3.75  | 2.79   | 0.0103 | 0.0105 | 0.0109 | 3.52E-04 |
| 3.09  | 3.75  | 2.79   | 0.0103 | 0.0105 | 0.0109 | 3.52E-04 |
| 3.09  | 3.75  | 2.79   | 0.0103 | 0.0105 | 0.0109 | 3.52E-04 |
| 0.011 | 0.012 | 0.0117 | 2.56   | 3.44   | 2.83   | 3.54E-04 |
| 2.86  | 3.69  | 3.85   | 0.0103 | 0.0105 | 0.0109 | 3.54E-04 |
| 2.86  | 3.69  | 3.85   | 0.0103 | 0.0105 | 0.0109 | 3.54E-04 |
| 0.011 | 0.012 | 0.0117 | 2.54   | 3.31   | 2.59   | 3.54E-04 |
| 0.011 | 0.012 | 0.0117 | 2.54   | 3.31   | 2.59   | 3.54E-04 |
| 2.58  | 3.51  | 3.22   | 0.0103 | 0.0105 | 0.0109 | 3.55E-04 |
| 2.58  | 3.51  | 3.22   | 0.0103 | 0.0105 | 0.0109 | 3.55E-04 |
| 0.011 | 0.012 | 0.0117 | 3.75   | 3.47   | 2.76   | 3.55E-04 |
| 0.011 | 0.012 | 0.0117 | 3.75   | 3.47   | 2.76   | 3.55E-04 |
| 4.36  | 3.83  | 5.19   | 0.0103 | 0.0105 | 0.0109 | 3.57E-04 |
| 0.011 | 0.012 | 0.0117 | 2.54   | 2.93   | 2.15   | 3.58E-04 |
| 4.06  | 3.39  | 3      | 0.0103 | 0.0105 | 0.0109 | 3.59E-04 |
| 4.06  | 3.39  | 3      | 0.0103 | 0.0105 | 0.0109 | 3.59E-04 |
| 4.06  | 3.39  | 3      | 0.0103 | 0.0105 | 0.0109 | 3.59E-04 |
| 3.51  | 2.85  | 3.89   | 0.0103 | 0.0105 | 0.0109 | 3.61E-04 |
| 3.51  | 2.85  | 3.89   | 0.0103 | 0.0105 | 0.0109 | 3.61E-04 |
| 3.75  | 4.18  | 5.06   | 0.0103 | 0.0105 | 0.0109 | 3.61E-04 |
| 2.91  | 2.3   | 2.21   | 0.0103 | 0.0105 | 0.0109 | 3.62E-04 |
| 0.011 | 0.012 | 0.0117 | 3.77   | 3.38   | 2.76   | 3.63E-04 |
| 3.9   | 5.19  | 4.16   | 0.0103 | 0.0105 | 0.0109 | 3.64E-04 |
| 4.06  | 2.97  | 3.6    | 0.0103 | 0.0105 | 0.0109 | 3.64E-04 |
| 0.011 | 0.012 | 0.0117 | 3.97   | 3.14   | 3.01   | 3.64E-04 |
| 0.011 | 0.012 | 0.0117 | 3.97   | 3.14   | 3.01   | 3.64E-04 |
| 3.24  | 2.41  | 2.65   | 0.0103 | 0.0105 | 0.0109 | 3.65E-04 |
| 0.011 | 0.012 | 0.0117 | 2.87   | 2.53   | 3.43   | 3.65E-04 |
| 0.011 | 0.012 | 0.0117 | 2.87   | 2.53   | 3.43   | 3.65E-04 |
| 2.82  | 2.38  | 3.25   | 0.0103 | 0.0105 | 0.0109 | 3.65E-04 |
| 0.011 | 0.012 | 0.0117 | 2.68   | 2.08   | 2.81   | 3.65E-04 |
| 2.88  | 2.78  | 2.14   | 0.0103 | 0.0105 | 0.0109 | 3.66E-04 |

|       |       |        |        |        |        |          |
|-------|-------|--------|--------|--------|--------|----------|
| 2.88  | 2.78  | 2.14   | 0.0103 | 0.0105 | 0.0109 | 3.66E-04 |
| 0.011 | 0.012 | 0.0117 | 2.65   | 2.98   | 2.18   | 3.66E-04 |
| 3.34  | 2.48  | 2.74   | 0.0103 | 0.0105 | 0.0109 | 3.66E-04 |
| 3.12  | 2.46  | 2.37   | 0.0103 | 0.0105 | 0.0109 | 3.66E-04 |
| 3.19  | 2.55  | 2.4    | 0.0103 | 0.0105 | 0.0109 | 3.67E-04 |
| 0.011 | 0.012 | 0.0117 | 2.6    | 3.04   | 2.23   | 3.67E-04 |
| 0.011 | 0.012 | 0.0117 | 2.6    | 3.04   | 2.23   | 3.67E-04 |
| 0.011 | 0.012 | 0.0117 | 3.24   | 2.47   | 2.54   | 3.70E-04 |
| 0.011 | 0.012 | 0.0117 | 2.51   | 2.26   | 3.05   | 3.71E-04 |
| 2.66  | 2.07  | 2.04   | 0.0103 | 0.0105 | 0.0109 | 3.71E-04 |
| 5.31  | 5.65  | 5.5    | 3.83   | 4.1    | 3.76   | 3.71E-04 |
| 5.31  | 5.65  | 5.5    | 3.83   | 4.1    | 3.76   | 3.71E-04 |
| 5.31  | 5.65  | 5.5    | 3.83   | 4.1    | 3.76   | 3.71E-04 |
| 3.18  | 2.58  | 3.53   | 0.0103 | 0.0105 | 0.0109 | 3.71E-04 |
| 2     | 2.68  | 2.17   | 0.0103 | 0.0105 | 0.0109 | 3.72E-04 |
| 2     | 2.68  | 2.17   | 0.0103 | 0.0105 | 0.0109 | 3.72E-04 |
| 4.23  | 3.19  | 3.36   | 0.0103 | 0.0105 | 0.0109 | 3.72E-04 |
| 0.011 | 0.012 | 0.0117 | 2.03   | 2.77   | 2.37   | 3.72E-04 |
| 0.011 | 0.012 | 0.0117 | 2.49   | 2.76   | 3.36   | 3.72E-04 |
| 4.07  | 4.59  | 3.35   | 0.0103 | 0.0105 | 0.0109 | 3.74E-04 |
| 4.07  | 4.59  | 3.35   | 0.0103 | 0.0105 | 0.0109 | 3.74E-04 |
| 0.011 | 0.012 | 0.0117 | 2.82   | 3.35   | 3.86   | 3.75E-04 |
| 4.37  | 3.93  | 3.19   | 0.0103 | 0.0105 | 0.0109 | 3.76E-04 |
| 0.011 | 0.012 | 0.0117 | 3      | 2.27   | 3.03   | 3.76E-04 |
| 2     | 2.73  | 2.32   | 0.0103 | 0.0105 | 0.0109 | 3.78E-04 |
| 2     | 2.73  | 2.32   | 0.0103 | 0.0105 | 0.0109 | 3.78E-04 |
| 3.38  | 4.22  | 3.16   | 0.0103 | 0.0105 | 0.0109 | 3.78E-04 |
| 3.38  | 4.22  | 3.16   | 0.0103 | 0.0105 | 0.0109 | 3.78E-04 |
| 2.59  | 3.19  | 3.55   | 0.0103 | 0.0105 | 0.0109 | 3.79E-04 |
| 0.011 | 0.012 | 0.0117 | 2.64   | 3.09   | 3.61   | 3.79E-04 |
| 0.011 | 0.012 | 0.0117 | 2.57   | 2.85   | 2.08   | 3.80E-04 |
| 2.92  | 2.35  | 3.22   | 0.0103 | 0.0105 | 0.0109 | 3.81E-04 |
| 0.011 | 0.012 | 0.0117 | 2.92   | 3.1    | 3.89   | 3.81E-04 |
| 3.11  | 2.28  | 2.9    | 0.0103 | 0.0105 | 0.0109 | 3.82E-04 |
| 2.9   | 2.77  | 2.14   | 0.0103 | 0.0105 | 0.0109 | 3.82E-04 |
| 0.011 | 0.012 | 0.0117 | 3.03   | 3.47   | 2.53   | 3.82E-04 |
| 0.011 | 0.012 | 0.0117 | 3.03   | 3.47   | 2.53   | 3.82E-04 |
| 0.011 | 0.012 | 0.0117 | 2.59   | 3.19   | 2.37   | 3.83E-04 |
| 0.011 | 0.012 | 0.0117 | 2.59   | 3.19   | 2.37   | 3.83E-04 |
| 0.011 | 0.012 | 0.0117 | 2.71   | 3.53   | 2.73   | 3.84E-04 |
| 0.011 | 0.012 | 0.0117 | 3      | 3.04   | 2.27   | 3.85E-04 |
| 2.69  | 1.96  | 2.41   | 0.0103 | 0.0105 | 0.0109 | 3.86E-04 |
| 2.69  | 1.96  | 2.41   | 0.0103 | 0.0105 | 0.0109 | 3.86E-04 |
| 4.01  | 3.36  | 2.94   | 0.0103 | 0.0105 | 0.0109 | 3.87E-04 |
| 3.27  | 2.4   | 2.73   | 0.0103 | 0.0105 | 0.0109 | 3.88E-04 |
| 3.27  | 2.4   | 2.73   | 0.0103 | 0.0105 | 0.0109 | 3.88E-04 |
| 3.1   | 2.61  | 2.27   | 0.0103 | 0.0105 | 0.0109 | 3.88E-04 |
| 3.1   | 2.61  | 2.27   | 0.0103 | 0.0105 | 0.0109 | 3.88E-04 |
| 0.011 | 0.012 | 0.0117 | 3.52   | 2.57   | 3      | 3.90E-04 |
| 4.36  | 3.42  | 3.3    | 0.0103 | 0.0105 | 0.0109 | 3.90E-04 |
| 0.011 | 0.012 | 0.0117 | 2.99   | 3.86   | 2.95   | 3.93E-04 |
| 3.7   | 2.73  | 3.03   | 0.0103 | 0.0105 | 0.0109 | 3.94E-04 |
| 3.7   | 2.73  | 3.03   | 0.0103 | 0.0105 | 0.0109 | 3.94E-04 |
| 3.7   | 2.73  | 3.03   | 0.0103 | 0.0105 | 0.0109 | 3.94E-04 |
| 0.011 | 0.012 | 0.0117 | 3.11   | 3.2    | 2.37   | 3.94E-04 |
| 0.011 | 0.012 | 0.0117 | 3.11   | 3.2    | 2.37   | 3.94E-04 |
| 0.011 | 0.012 | 0.0117 | 2.41   | 3.03   | 2.27   | 3.94E-04 |
| 0.011 | 0.012 | 0.0117 | 2.41   | 3.03   | 2.27   | 3.94E-04 |

|       |       |        |        |        |        |          |
|-------|-------|--------|--------|--------|--------|----------|
| 0.011 | 0.012 | 0.0117 | 3.26   | 2.55   | 2.47   | 3.96E-04 |
| 0.011 | 0.012 | 0.0117 | 2.82   | 2.38   | 3.27   | 3.96E-04 |
| 0.011 | 0.012 | 0.0117 | 2.93   | 2.13   | 2.62   | 3.96E-04 |
| 3.71  | 2.8   | 3.76   | 0.0103 | 0.0105 | 0.0109 | 3.97E-04 |
| 3.03  | 2.32  | 2.34   | 0.0103 | 0.0105 | 0.0109 | 3.97E-04 |
| 3.03  | 2.32  | 2.34   | 0.0103 | 0.0105 | 0.0109 | 3.97E-04 |
| 2.36  | 2.97  | 3.24   | 0.0103 | 0.0105 | 0.0109 | 3.97E-04 |
| 2.07  | 2.7   | 2.81   | 0.0103 | 0.0105 | 0.0109 | 4.00E-04 |
| 2.07  | 2.7   | 2.81   | 0.0103 | 0.0105 | 0.0109 | 4.00E-04 |
| 4.82  | 3.51  | 4.44   | 0.0103 | 0.0105 | 0.0109 | 4.00E-04 |
| 3.51  | 3     | 4.12   | 0.0103 | 0.0105 | 0.0109 | 4.00E-04 |
| 3.51  | 3     | 4.12   | 0.0103 | 0.0105 | 0.0109 | 4.00E-04 |
| 3.51  | 3     | 4.12   | 0.0103 | 0.0105 | 0.0109 | 4.00E-04 |
| 2.02  | 2.72  | 2.67   | 0.0103 | 0.0105 | 0.0109 | 4.01E-04 |
| 2.79  | 2.08  | 2.23   | 0.0103 | 0.0105 | 0.0109 | 4.01E-04 |
| 2.79  | 2.08  | 2.23   | 0.0103 | 0.0105 | 0.0109 | 4.01E-04 |
| 2.46  | 2.99  | 3.39   | 0.0103 | 0.0105 | 0.0109 | 4.02E-04 |
| 2.78  | 2.05  | 2.27   | 0.0103 | 0.0105 | 0.0109 | 4.03E-04 |
| 3.08  | 4.03  | 4.18   | 0.0103 | 0.0105 | 0.0109 | 4.03E-04 |
| 3.65  | 2.84  | 2.77   | 0.0103 | 0.0105 | 0.0109 | 4.03E-04 |
| 3     | 2.78  | 3.74   | 0.0103 | 0.0105 | 0.0109 | 4.03E-04 |
| 4.05  | 3.11  | 3.11   | 0.0103 | 0.0105 | 0.0109 | 4.03E-04 |
| 0.011 | 0.012 | 0.0117 | 3.55   | 2.99   | 2.59   | 4.04E-04 |
| 0.011 | 0.012 | 0.0117 | 3.55   | 2.99   | 2.59   | 4.04E-04 |
| 3.57  | 3.12  | 2.59   | 0.0103 | 0.0105 | 0.0109 | 4.04E-04 |
| 3.57  | 3.12  | 2.59   | 0.0103 | 0.0105 | 0.0109 | 4.04E-04 |
| 3.48  | 2.53  | 2.98   | 0.0103 | 0.0105 | 0.0109 | 4.05E-04 |
| 3.48  | 2.53  | 2.98   | 0.0103 | 0.0105 | 0.0109 | 4.05E-04 |
| 2.91  | 2.22  | 2.25   | 0.0103 | 0.0105 | 0.0109 | 4.05E-04 |
| 2.91  | 2.22  | 2.25   | 0.0103 | 0.0105 | 0.0109 | 4.05E-04 |
| 3.11  | 2.43  | 3.33   | 0.0103 | 0.0105 | 0.0109 | 4.06E-04 |
| 2.73  | 3.77  | 3.34   | 0.0103 | 0.0105 | 0.0109 | 4.12E-04 |
| 0.011 | 0.012 | 0.0117 | 2.87   | 3.46   | 2.53   | 4.13E-04 |
| 3.09  | 2.56  | 2.26   | 0.0103 | 0.0105 | 0.0109 | 4.14E-04 |
| 3.09  | 2.56  | 2.26   | 0.0103 | 0.0105 | 0.0109 | 4.14E-04 |
| 2.88  | 3.97  | 3.4    | 0.0103 | 0.0105 | 0.0109 | 4.14E-04 |
| 2.88  | 3.97  | 3.4    | 0.0103 | 0.0105 | 0.0109 | 4.14E-04 |
| 2.88  | 3.97  | 3.4    | 0.0103 | 0.0105 | 0.0109 | 4.14E-04 |
| 2.88  | 3.97  | 3.4    | 0.0103 | 0.0105 | 0.0109 | 4.14E-04 |
| 2.88  | 3.97  | 3.4    | 0.0103 | 0.0105 | 0.0109 | 4.14E-04 |
| 2.88  | 3.97  | 3.4    | 0.0103 | 0.0105 | 0.0109 | 4.14E-04 |
| 2.88  | 3.97  | 3.4    | 0.0103 | 0.0105 | 0.0109 | 4.14E-04 |
| 2.88  | 3.97  | 3.4    | 0.0103 | 0.0105 | 0.0109 | 4.14E-04 |
| 2.88  | 3.97  | 3.4    | 0.0103 | 0.0105 | 0.0109 | 4.14E-04 |
| 2.88  | 3.97  | 3.4    | 0.0103 | 0.0105 | 0.0109 | 4.14E-04 |
| 2.88  | 3.97  | 3.4    | 0.0103 | 0.0105 | 0.0109 | 4.14E-04 |
| 2.88  | 3.97  | 3.4    | 0.0103 | 0.0105 | 0.0109 | 4.14E-04 |
| 2.88  | 3.97  | 3.4    | 0.0103 | 0.0105 | 0.0109 | 4.14E-04 |
| 2.88  | 3.97  | 3.4    | 0.0103 | 0.0105 | 0.0109 | 4.14E-04 |
| 2.88  | 3.97  | 3.4    | 0.0103 | 0.0105 | 0.0109 | 4.14E-04 |
| 2.88  | 3.97  | 3.4    | 0.0103 | 0.0105 | 0.0109 | 4.14E-04 |
| 0.011 | 0.012 | 0.0117 | 3.53   | 2.56   | 3.22   | 4.15E-04 |
| 4.48  | 3.39  | 3.48   | 0.0103 | 0.0105 | 0.0109 | 4.17E-04 |
| 3.95  | 2.87  | 3.34   | 0.0103 | 0.0105 | 0.0109 | 4.17E-04 |
| 3.95  | 2.87  | 3.34   | 0.0103 | 0.0105 | 0.0109 | 4.17E-04 |
| 3.32  | 3.06  | 2.41   | 0.0103 | 0.0105 | 0.0109 | 4.19E-04 |
| 3.32  | 3.06  | 2.41   | 0.0103 | 0.0105 | 0.0109 | 4.19E-04 |
| 3.32  | 3.06  | 2.41   | 0.0103 | 0.0105 | 0.0109 | 4.19E-04 |
| 3.32  | 3.06  | 2.41   | 0.0103 | 0.0105 | 0.0109 | 4.19E-04 |
| 3.33  | 2.81  | 2.42   | 0.0103 | 0.0105 | 0.0109 | 4.19E-04 |
| 3.33  | 2.81  | 2.42   | 0.0103 | 0.0105 | 0.0109 | 4.19E-04 |
| 4.14  | 3.35  | 3.05   | 0.0103 | 0.0105 | 0.0109 | 4.21E-04 |
| 3.99  | 4.63  | 3.35   | 0.0103 | 0.0105 | 0.0109 | 4.21E-04 |



|       |       |        |        |        |        |          |
|-------|-------|--------|--------|--------|--------|----------|
| 2.96  | 2.73  | 3.69   | 0.0103 | 0.0105 | 0.0109 | 4.22E-04 |
| 2.96  | 2.73  | 3.69   | 0.0103 | 0.0105 | 0.0109 | 4.22E-04 |
| 3.1   | 3.63  | 2.63   | 0.0103 | 0.0105 | 0.0109 | 4.22E-04 |
| 0.011 | 0.012 | 0.0117 | 2.24   | 3.04   | 2.46   | 4.22E-04 |
| 0.011 | 0.012 | 0.0117 | 2.24   | 3.04   | 2.46   | 4.22E-04 |
| 3.49  | 2.93  | 4.05   | 0.0103 | 0.0105 | 0.0109 | 4.23E-04 |
| 2.06  | 2.18  | 2.76   | 0.0103 | 0.0105 | 0.0109 | 4.25E-04 |
| 2.06  | 2.18  | 2.76   | 0.0103 | 0.0105 | 0.0109 | 4.25E-04 |
| 0.011 | 0.012 | 0.0117 | 2.54   | 3.24   | 2.43   | 4.26E-04 |
| 0.011 | 0.012 | 0.0117 | 2.54   | 3.24   | 2.43   | 4.26E-04 |
| 2.29  | 2.14  | 2.88   | 0.0103 | 0.0105 | 0.0109 | 4.26E-04 |
| 4.72  | 3.5   | 3.76   | 0.0103 | 0.0105 | 0.0109 | 4.27E-04 |
| 4.72  | 3.5   | 3.76   | 0.0103 | 0.0105 | 0.0109 | 4.27E-04 |
| 4.72  | 3.5   | 3.76   | 0.0103 | 0.0105 | 0.0109 | 4.27E-04 |
| 5.97  | 4.31  | 5.19   | 0.0103 | 0.0105 | 0.0109 | 4.27E-04 |
| 2.89  | 2.14  | 2.31   | 0.0103 | 0.0105 | 0.0109 | 4.28E-04 |
| 2.89  | 2.14  | 2.31   | 0.0103 | 0.0105 | 0.0109 | 4.28E-04 |
| 3.48  | 3.08  | 2.51   | 0.0103 | 0.0105 | 0.0109 | 4.32E-04 |
| 2.84  | 2.1   | 2.8    | 0.0103 | 0.0105 | 0.0109 | 4.33E-04 |
| 2.84  | 2.1   | 2.8    | 0.0103 | 0.0105 | 0.0109 | 4.33E-04 |
| 4.62  | 3.93  | 3.34   | 0.0103 | 0.0105 | 0.0109 | 4.34E-04 |
| 0.011 | 0.012 | 0.0117 | 2.67   | 3.69   | 3.4    | 4.35E-04 |
| 2.37  | 3.28  | 2.8    | 0.0103 | 0.0105 | 0.0109 | 4.36E-04 |
| 2.37  | 3.28  | 2.8    | 0.0103 | 0.0105 | 0.0109 | 4.36E-04 |
| 0.011 | 0.012 | 0.0117 | 2.86   | 3.95   | 3.66   | 4.37E-04 |
| 2.31  | 2.22  | 2.96   | 0.0103 | 0.0105 | 0.0109 | 4.38E-04 |
| 2.31  | 2.22  | 2.96   | 0.0103 | 0.0105 | 0.0109 | 4.38E-04 |
| 3.36  | 3.6   | 2.61   | 0.0103 | 0.0105 | 0.0109 | 4.38E-04 |
| 3.36  | 3.6   | 2.61   | 0.0103 | 0.0105 | 0.0109 | 4.38E-04 |
| 0.011 | 0.012 | 0.0117 | 4.11   | 3.17   | 3.11   | 4.39E-04 |
| 0.011 | 0.012 | 0.0117 | 2.25   | 2.49   | 3.07   | 4.41E-04 |
| 0.011 | 0.012 | 0.0117 | 3.56   | 2.59   | 2.94   | 4.41E-04 |
| 0.011 | 0.012 | 0.0117 | 2.9    | 2.3    | 3.19   | 4.44E-04 |
| 2.16  | 2.89  | 2.26   | 0.0103 | 0.0105 | 0.0109 | 4.45E-04 |
| 2.16  | 2.89  | 2.26   | 0.0103 | 0.0105 | 0.0109 | 4.45E-04 |
| 0.011 | 0.012 | 0.0117 | 2.67   | 2.45   | 3.33   | 4.47E-04 |
| 2.96  | 3.42  | 4.09   | 0.0103 | 0.0105 | 0.0109 | 4.47E-04 |
| 2.96  | 3.42  | 4.09   | 0.0103 | 0.0105 | 0.0109 | 4.47E-04 |
| 0.011 | 0.012 | 0.0117 | 2.63   | 3.17   | 2.3    | 4.48E-04 |
| 0.011 | 0.012 | 0.0117 | 2.22   | 3.08   | 2.81   | 4.48E-04 |
| 0.011 | 0.012 | 0.0117 | 2.33   | 3.21   | 3.03   | 4.48E-04 |
| 2.45  | 3.25  | 2.51   | 0.0103 | 0.0105 | 0.0109 | 4.49E-04 |
| 2.45  | 3.25  | 2.51   | 0.0103 | 0.0105 | 0.0109 | 4.49E-04 |
| 3.33  | 2.4   | 2.84   | 0.0103 | 0.0105 | 0.0109 | 4.49E-04 |
| 2.31  | 3.17  | 2.59   | 0.0103 | 0.0105 | 0.0109 | 4.52E-04 |
| 2.31  | 3.17  | 2.59   | 0.0103 | 0.0105 | 0.0109 | 4.52E-04 |
| 3.55  | 2.7   | 2.71   | 0.0103 | 0.0105 | 0.0109 | 4.54E-04 |
| 3.55  | 2.7   | 2.71   | 0.0103 | 0.0105 | 0.0109 | 4.54E-04 |
| 4.18  | 3     | 3.67   | 0.0103 | 0.0105 | 0.0109 | 4.56E-04 |
| 4.18  | 3     | 3.67   | 0.0103 | 0.0105 | 0.0109 | 4.56E-04 |
| 4.18  | 3     | 3.67   | 0.0103 | 0.0105 | 0.0109 | 4.56E-04 |
| 0.011 | 0.012 | 0.0117 | 2.32   | 3.1    | 2.41   | 4.57E-04 |
| 0.011 | 0.012 | 0.0117 | 2.65   | 3.67   | 3.42   | 4.58E-04 |
| 2.52  | 2.23  | 3.07   | 0.0103 | 0.0105 | 0.0109 | 4.58E-04 |
| 2.52  | 2.23  | 3.07   | 0.0103 | 0.0105 | 0.0109 | 4.58E-04 |
| 2.52  | 2.23  | 3.07   | 0.0103 | 0.0105 | 0.0109 | 4.58E-04 |
| 4.24  | 3.95  | 3.06   | 0.0103 | 0.0105 | 0.0109 | 4.59E-04 |
| 3.57  | 4.43  | 3.24   | 0.0103 | 0.0105 | 0.0109 | 4.59E-04 |

|       |       |        |        |        |        |          |
|-------|-------|--------|--------|--------|--------|----------|
| 0.011 | 0.012 | 0.0117 | 3.66   | 3.4    | 2.64   | 4.60E-04 |
| 3.15  | 3.22  | 3.29   | 2.36   | 2.53   | 2.31   | 4.60E-04 |
| 2.47  | 2.9   | 3.43   | 0.0103 | 0.0105 | 0.0109 | 4.60E-04 |
| 2.47  | 2.9   | 3.43   | 0.0103 | 0.0105 | 0.0109 | 4.60E-04 |
| 0.011 | 0.012 | 0.0117 | 2.5    | 2.41   | 3.22   | 4.60E-04 |
| 3.86  | 2.77  | 3.47   | 0.0103 | 0.0105 | 0.0109 | 4.61E-04 |
| 3.86  | 2.77  | 3.47   | 0.0103 | 0.0105 | 0.0109 | 4.61E-04 |
| 3.16  | 2.31  | 3.07   | 0.0103 | 0.0105 | 0.0109 | 4.62E-04 |
| 2.13  | 2.63  | 2.97   | 0.0103 | 0.0105 | 0.0109 | 4.62E-04 |
| 2.9   | 2.08  | 2.58   | 0.0103 | 0.0105 | 0.0109 | 4.62E-04 |
| 3.4   | 2.45  | 2.86   | 0.0103 | 0.0105 | 0.0109 | 4.62E-04 |
| 3.4   | 2.45  | 2.86   | 0.0103 | 0.0105 | 0.0109 | 4.62E-04 |
| 3.4   | 2.45  | 2.86   | 0.0103 | 0.0105 | 0.0109 | 4.62E-04 |
| 3.53  | 3.14  | 2.53   | 0.0103 | 0.0105 | 0.0109 | 4.65E-04 |
| 3.53  | 3.14  | 2.53   | 0.0103 | 0.0105 | 0.0109 | 4.65E-04 |
| 0.011 | 0.012 | 0.0117 | 3.21   | 2.3    | 2.84   | 4.67E-04 |
| 3.64  | 2.62  | 3.37   | 0.0103 | 0.0105 | 0.0109 | 4.68E-04 |
| 3.64  | 2.62  | 3.37   | 0.0103 | 0.0105 | 0.0109 | 4.68E-04 |
| 2.77  | 3.13  | 3.82   | 0.0103 | 0.0105 | 0.0109 | 4.68E-04 |
| 2.77  | 3.13  | 3.82   | 0.0103 | 0.0105 | 0.0109 | 4.68E-04 |
| 2.77  | 3.13  | 3.82   | 0.0103 | 0.0105 | 0.0109 | 4.68E-04 |
| 5.48  | 5.58  | 4.09   | 0.0103 | 0.0105 | 0.0109 | 4.69E-04 |
| 0.011 | 0.012 | 0.0117 | 2.97   | 4.1    | 3.36   | 4.73E-04 |
| 0.011 | 0.012 | 0.0117 | 2.97   | 4.1    | 3.36   | 4.73E-04 |
| 0.011 | 0.012 | 0.0117 | 2.99   | 3.5    | 4.16   | 4.74E-04 |
| 3.24  | 2.39  | 3.23   | 0.0103 | 0.0105 | 0.0109 | 4.74E-04 |
| 3.7   | 2.82  | 3.9    | 0.0103 | 0.0105 | 0.0109 | 4.76E-04 |
| 0.011 | 0.012 | 0.0117 | 3.64   | 2.61   | 3.33   | 4.78E-04 |
| 3.32  | 2.61  | 2.45   | 0.0103 | 0.0105 | 0.0109 | 4.81E-04 |
| 2.69  | 2.73  | 3.57   | 0.0103 | 0.0105 | 0.0109 | 4.81E-04 |
| 2.69  | 2.73  | 3.57   | 0.0103 | 0.0105 | 0.0109 | 4.81E-04 |
| 2.69  | 2.73  | 3.57   | 0.0103 | 0.0105 | 0.0109 | 4.81E-04 |
| 0.011 | 0.012 | 0.0117 | 2.98   | 3.9    | 2.94   | 4.82E-04 |
| 0.011 | 0.012 | 0.0117 | 2.98   | 3.9    | 2.94   | 4.82E-04 |
| 2.99  | 4.1   | 4      | 0.0103 | 0.0105 | 0.0109 | 4.83E-04 |
| 2.99  | 4.1   | 4      | 0.0103 | 0.0105 | 0.0109 | 4.83E-04 |
| 2.99  | 4.1   | 4      | 0.0103 | 0.0105 | 0.0109 | 4.83E-04 |
| 3.37  | 2.42  | 3.13   | 0.0103 | 0.0105 | 0.0109 | 4.85E-04 |
| 3.79  | 2.89  | 2.86   | 0.0103 | 0.0105 | 0.0109 | 4.85E-04 |
| 3.79  | 2.89  | 2.86   | 0.0103 | 0.0105 | 0.0109 | 4.85E-04 |
| 3.42  | 2.45  | 3.14   | 0.0103 | 0.0105 | 0.0109 | 4.86E-04 |
| 3.42  | 2.45  | 3.14   | 0.0103 | 0.0105 | 0.0109 | 4.86E-04 |
| 3.69  | 3.04  | 2.66   | 0.0103 | 0.0105 | 0.0109 | 4.88E-04 |
| 3.69  | 3.04  | 2.66   | 0.0103 | 0.0105 | 0.0109 | 4.88E-04 |
| 0.011 | 0.012 | 0.0117 | 3.82   | 2.95   | 2.85   | 4.88E-04 |
| 0.011 | 0.012 | 0.0117 | 3.82   | 2.95   | 2.85   | 4.88E-04 |
| 2.16  | 2.98  | 2.42   | 0.0103 | 0.0105 | 0.0109 | 4.88E-04 |
| 2.16  | 2.98  | 2.42   | 0.0103 | 0.0105 | 0.0109 | 4.88E-04 |
| 2.16  | 2.98  | 2.42   | 0.0103 | 0.0105 | 0.0109 | 4.88E-04 |
| 3.23  | 3.2   | 2.37   | 0.0103 | 0.0105 | 0.0109 | 4.88E-04 |
| 4.56  | 3.3   | 3.71   | 0.0103 | 0.0105 | 0.0109 | 4.89E-04 |
| 0.011 | 0.012 | 0.0117 | 3.26   | 2.96   | 2.33   | 4.90E-04 |
| 3.08  | 3.78  | 4.32   | 0.0103 | 0.0105 | 0.0109 | 4.91E-04 |
| 2.17  | 2.99  | 2.89   | 0.0103 | 0.0105 | 0.0109 | 4.92E-04 |
| 0.011 | 0.012 | 0.0117 | 3.26   | 2.61   | 3.66   | 4.93E-04 |
| 0.011 | 0.012 | 0.0117 | 3.26   | 2.61   | 3.66   | 4.93E-04 |
| 3.9   | 3.07  | 4.3    | 0.0103 | 0.0105 | 0.0109 | 4.93E-04 |
| 3.9   | 3.07  | 4.3    | 0.0103 | 0.0105 | 0.0109 | 4.93E-04 |

|       |       |        |        |        |        |          |
|-------|-------|--------|--------|--------|--------|----------|
| 3.9   | 3.07  | 4.3    | 0.0103 | 0.0105 | 0.0109 | 4.93E-04 |
| 3.49  | 2.67  | 2.62   | 0.0103 | 0.0105 | 0.0109 | 4.94E-04 |
| 3.49  | 2.67  | 2.62   | 0.0103 | 0.0105 | 0.0109 | 4.94E-04 |
| 3.49  | 2.67  | 2.62   | 0.0103 | 0.0105 | 0.0109 | 4.94E-04 |
| 3.17  | 2.26  | 2.82   | 0.0103 | 0.0105 | 0.0109 | 4.94E-04 |
| 3.17  | 2.26  | 2.82   | 0.0103 | 0.0105 | 0.0109 | 4.94E-04 |
| 2.25  | 3.03  | 2.35   | 0.0103 | 0.0105 | 0.0109 | 4.94E-04 |
| 2.25  | 3.03  | 2.35   | 0.0103 | 0.0105 | 0.0109 | 4.94E-04 |
| 2.13  | 2.79  | 2.96   | 0.0103 | 0.0105 | 0.0109 | 4.95E-04 |
| 2.36  | 3.31  | 2.97   | 0.0103 | 0.0105 | 0.0109 | 4.96E-04 |
| 0.011 | 0.012 | 0.0117 | 3.21   | 4.22   | 3.18   | 4.99E-04 |
| 3.8   | 2.71  | 3.25   | 0.0103 | 0.0105 | 0.0109 | 5.00E-04 |
| 2.92  | 2.13  | 2.87   | 0.0103 | 0.0105 | 0.0109 | 5.02E-04 |
| 2.92  | 2.13  | 2.87   | 0.0103 | 0.0105 | 0.0109 | 5.02E-04 |
| 2.96  | 2.88  | 2.15   | 0.0103 | 0.0105 | 0.0109 | 5.02E-04 |
| 0.011 | 0.012 | 0.0117 | 2.83   | 2.8    | 3.72   | 5.03E-04 |
| 3.45  | 3.34  | 2.5    | 0.0103 | 0.0105 | 0.0109 | 5.04E-04 |
| 4.66  | 3.66  | 3.42   | 0.0103 | 0.0105 | 0.0109 | 5.05E-04 |
| 4.66  | 3.66  | 3.42   | 0.0103 | 0.0105 | 0.0109 | 5.05E-04 |
| 0.011 | 0.012 | 0.0117 | 2.96   | 4.16   | 3.72   | 5.06E-04 |
| 2.23  | 2.04  | 2.8    | 0.0103 | 0.0105 | 0.0109 | 5.06E-04 |
| 2.23  | 2.04  | 2.8    | 0.0103 | 0.0105 | 0.0109 | 5.06E-04 |
| 3.39  | 2.64  | 2.5    | 0.0103 | 0.0105 | 0.0109 | 5.10E-04 |
| 5.37  | 3.82  | 4.6    | 0.0103 | 0.0105 | 0.0109 | 5.11E-04 |
| 0.011 | 0.012 | 0.0117 | 2.17   | 3.02   | 2.86   | 5.12E-04 |
| 3.47  | 2.65  | 3.7    | 0.0103 | 0.0105 | 0.0109 | 5.13E-04 |
| 3.47  | 2.65  | 3.7    | 0.0103 | 0.0105 | 0.0109 | 5.13E-04 |
| 2.46  | 2.27  | 3.11   | 0.0103 | 0.0105 | 0.0109 | 5.14E-04 |
| 3.23  | 2.55  | 2.36   | 0.0103 | 0.0105 | 0.0109 | 5.14E-04 |
| 0.011 | 0.012 | 0.0117 | 3.28   | 2.34   | 2.76   | 5.14E-04 |
| 0.011 | 0.012 | 0.0117 | 3.28   | 2.34   | 2.76   | 5.14E-04 |
| 5.03  | 3.61  | 4.77   | 0.0103 | 0.0105 | 0.0109 | 5.17E-04 |
| 4.44  | 3.21  | 4.31   | 0.0103 | 0.0105 | 0.0109 | 5.22E-04 |
| 4.44  | 3.21  | 4.31   | 0.0103 | 0.0105 | 0.0109 | 5.22E-04 |
| 3.77  | 3.6   | 2.71   | 0.0103 | 0.0105 | 0.0109 | 5.22E-04 |
| 2.35  | 3.31  | 2.82   | 0.0103 | 0.0105 | 0.0109 | 5.28E-04 |
| 2.35  | 3.31  | 2.82   | 0.0103 | 0.0105 | 0.0109 | 5.28E-04 |
| 3.99  | 2.83  | 3.6    | 0.0103 | 0.0105 | 0.0109 | 5.28E-04 |
| 4.15  | 3.95  | 4.07   | 2.4    | 2.82   | 2.42   | 5.29E-04 |
| 4.15  | 3.95  | 4.07   | 2.4    | 2.82   | 2.42   | 5.29E-04 |
| 2.96  | 2.37  | 2.14   | 0.0103 | 0.0105 | 0.0109 | 5.30E-04 |
| 2.2   | 3     | 2.34   | 0.0103 | 0.0105 | 0.0109 | 5.31E-04 |
| 2.73  | 3.59  | 2.68   | 0.0103 | 0.0105 | 0.0109 | 5.36E-04 |
| 2.73  | 3.59  | 2.68   | 0.0103 | 0.0105 | 0.0109 | 5.36E-04 |
| 0.011 | 0.012 | 0.0117 | 2.97   | 3.67   | 4.2    | 5.38E-04 |
| 0.011 | 0.012 | 0.0117 | 2.97   | 3.67   | 4.2    | 5.38E-04 |
| 0.011 | 0.012 | 0.0117 | 2.88   | 3.95   | 3.1    | 5.39E-04 |
| 3.53  | 2.95  | 2.51   | 0.0103 | 0.0105 | 0.0109 | 5.39E-04 |
| 0.011 | 0.012 | 0.0117 | 3.04   | 2.8    | 2.16   | 5.39E-04 |
| 3.65  | 4.34  | 3.08   | 0.0103 | 0.0105 | 0.0109 | 5.41E-04 |
| 2.87  | 3.93  | 3.93   | 0.0103 | 0.0105 | 0.0109 | 5.42E-04 |
| 3.66  | 2.98  | 2.62   | 0.0103 | 0.0105 | 0.0109 | 5.43E-04 |
| 3.66  | 2.98  | 2.62   | 0.0103 | 0.0105 | 0.0109 | 5.43E-04 |
| 3.35  | 2.45  | 3.36   | 0.0103 | 0.0105 | 0.0109 | 5.44E-04 |
| 3.35  | 2.45  | 3.36   | 0.0103 | 0.0105 | 0.0109 | 5.44E-04 |
| 2.91  | 2.21  | 3.1    | 0.0103 | 0.0105 | 0.0109 | 5.44E-04 |
| 2.91  | 2.21  | 3.1    | 0.0103 | 0.0105 | 0.0109 | 5.44E-04 |
| 0.011 | 0.012 | 0.0117 | 2.37   | 3.24   | 3.25   | 5.44E-04 |

|       |       |        |        |        |        |          |
|-------|-------|--------|--------|--------|--------|----------|
| 3.77  | 3.22  | 4.53   | 0.0103 | 0.0105 | 0.0109 | 5.44E-04 |
| 0.011 | 0.012 | 0.0117 | 2.93   | 2.14   | 2.93   | 5.44E-04 |
| 3.34  | 2.55  | 2.48   | 0.0103 | 0.0105 | 0.0109 | 5.45E-04 |
| 3.34  | 2.55  | 2.48   | 0.0103 | 0.0105 | 0.0109 | 5.45E-04 |
| 2.26  | 3.04  | 3.14   | 0.0103 | 0.0105 | 0.0109 | 5.46E-04 |
| 2.26  | 3.04  | 3.14   | 0.0103 | 0.0105 | 0.0109 | 5.46E-04 |
| 4.16  | 3.58  | 2.94   | 0.0103 | 0.0105 | 0.0109 | 5.46E-04 |
| 4.16  | 3.58  | 2.94   | 0.0103 | 0.0105 | 0.0109 | 5.46E-04 |
| 0.011 | 0.012 | 0.0117 | 2.44   | 3.31   | 2.55   | 5.46E-04 |
| 3.9   | 3.12  | 2.81   | 0.0103 | 0.0105 | 0.0109 | 5.47E-04 |
| 0.011 | 0.012 | 0.0117 | 2.34   | 2.18   | 2.99   | 5.49E-04 |
| 4.21  | 2.97  | 3.7    | 0.0103 | 0.0105 | 0.0109 | 5.51E-04 |
| 4.21  | 2.97  | 3.7    | 0.0103 | 0.0105 | 0.0109 | 5.51E-04 |
| 4.21  | 2.97  | 3.7    | 0.0103 | 0.0105 | 0.0109 | 5.51E-04 |
| 3.64  | 2.57  | 3.14   | 0.0103 | 0.0105 | 0.0109 | 5.52E-04 |
| 2.75  | 2.64  | 3.58   | 0.0103 | 0.0105 | 0.0109 | 5.53E-04 |
| 2.75  | 2.64  | 3.58   | 0.0103 | 0.0105 | 0.0109 | 5.53E-04 |
| 3.54  | 2.58  | 2.76   | 0.0103 | 0.0105 | 0.0109 | 5.60E-04 |
| 3.54  | 2.58  | 2.76   | 0.0103 | 0.0105 | 0.0109 | 5.60E-04 |
| 3.54  | 2.58  | 2.76   | 0.0103 | 0.0105 | 0.0109 | 5.60E-04 |
| 3.61  | 2.66  | 2.77   | 0.0103 | 0.0105 | 0.0109 | 5.60E-04 |
| 2.87  | 2.53  | 3.54   | 0.0103 | 0.0105 | 0.0109 | 5.60E-04 |
| 2.87  | 2.53  | 3.54   | 0.0103 | 0.0105 | 0.0109 | 5.60E-04 |
| 0.011 | 0.012 | 0.0117 | 3.56   | 2.52   | 3.28   | 5.61E-04 |
| 2.75  | 3.87  | 3.63   | 0.0103 | 0.0105 | 0.0109 | 5.61E-04 |
| 2.75  | 3.87  | 3.63   | 0.0103 | 0.0105 | 0.0109 | 5.61E-04 |
| 2.75  | 3.87  | 3.63   | 0.0103 | 0.0105 | 0.0109 | 5.61E-04 |
| 3.9   | 3.34  | 2.75   | 0.0103 | 0.0105 | 0.0109 | 5.62E-04 |
| 3.9   | 3.34  | 2.75   | 0.0103 | 0.0105 | 0.0109 | 5.62E-04 |
| 2.63  | 3.56  | 2.72   | 0.0103 | 0.0105 | 0.0109 | 5.63E-04 |
| 2.63  | 3.56  | 2.72   | 0.0103 | 0.0105 | 0.0109 | 5.63E-04 |
| 3.09  | 2.57  | 2.19   | 0.0103 | 0.0105 | 0.0109 | 5.64E-04 |
| 0.011 | 0.012 | 0.0117 | 2.27   | 2.03   | 2.83   | 5.67E-04 |
| 3.39  | 2.72  | 2.43   | 0.0103 | 0.0105 | 0.0109 | 5.67E-04 |
| 3.45  | 2.51  | 2.69   | 0.0103 | 0.0105 | 0.0109 | 5.68E-04 |
| 3.45  | 2.51  | 2.69   | 0.0103 | 0.0105 | 0.0109 | 5.68E-04 |
| 3.77  | 3.13  | 4.44   | 0.0103 | 0.0105 | 0.0109 | 5.69E-04 |
| 2.36  | 2.66  | 3.3    | 0.0103 | 0.0105 | 0.0109 | 5.69E-04 |
| 2.36  | 2.66  | 3.3    | 0.0103 | 0.0105 | 0.0109 | 5.69E-04 |
| 2.3   | 3.27  | 2.86   | 0.0103 | 0.0105 | 0.0109 | 5.71E-04 |
| 0.011 | 0.012 | 0.0117 | 2.25   | 3      | 2.25   | 5.72E-04 |
| 3.15  | 2.67  | 2.22   | 0.0103 | 0.0105 | 0.0109 | 5.75E-04 |
| 3.15  | 2.67  | 2.22   | 0.0103 | 0.0105 | 0.0109 | 5.75E-04 |
| 0.011 | 0.012 | 0.0117 | 2.25   | 3.19   | 2.69   | 5.76E-04 |
| 3.06  | 2.2   | 2.43   | 0.0103 | 0.0105 | 0.0109 | 5.77E-04 |
| 0.011 | 0.012 | 0.0117 | 2.01   | 2.71   | 2.81   | 5.78E-04 |
| 0.011 | 0.012 | 0.0117 | 2.09   | 2.19   | 2.85   | 5.80E-04 |
| 3.84  | 4.22  | 2.97   | 0.0103 | 0.0105 | 0.0109 | 5.82E-04 |
| 3.84  | 4.22  | 2.97   | 0.0103 | 0.0105 | 0.0109 | 5.82E-04 |
| 3.84  | 4.22  | 2.97   | 0.0103 | 0.0105 | 0.0109 | 5.82E-04 |
| 0.011 | 0.012 | 0.0117 | 2.31   | 2.9    | 2.08   | 5.83E-04 |
| 2.43  | 2.23  | 3.09   | 0.0103 | 0.0105 | 0.0109 | 5.84E-04 |
| 3.38  | 3.28  | 2.42   | 0.0103 | 0.0105 | 0.0109 | 5.85E-04 |
| 3.72  | 2.76  | 2.81   | 0.0103 | 0.0105 | 0.0109 | 5.86E-04 |
| 3.72  | 2.76  | 2.81   | 0.0103 | 0.0105 | 0.0109 | 5.86E-04 |
| 0.011 | 0.012 | 0.0117 | 2.46   | 2.75   | 3.44   | 5.89E-04 |
| 0.011 | 0.012 | 0.0117 | 3.12   | 2.35   | 2.32   | 5.90E-04 |
| 4.03  | 3.21  | 4.58   | 0.0103 | 0.0105 | 0.0109 | 5.91E-04 |

|       |       |        |        |        |        |          |
|-------|-------|--------|--------|--------|--------|----------|
| 4.03  | 3.21  | 4.58   | 0.0103 | 0.0105 | 0.0109 | 5.91E-04 |
| 0.011 | 0.012 | 0.0117 | 3.79   | 2.82   | 2.85   | 5.92E-04 |
| 0.011 | 0.012 | 0.0117 | 2.88   | 4.09   | 3.42   | 5.93E-04 |
| 4.23  | 4.69  | 3.29   | 0.0103 | 0.0105 | 0.0109 | 5.95E-04 |
| 4.23  | 4.69  | 3.29   | 0.0103 | 0.0105 | 0.0109 | 5.95E-04 |
| 3.9   | 2.77  | 3.72   | 0.0103 | 0.0105 | 0.0109 | 5.96E-04 |
| 0.011 | 0.012 | 0.0117 | 2.44   | 2.83   | 3.45   | 5.97E-04 |
| 0.011 | 0.012 | 0.0117 | 2.44   | 2.83   | 3.45   | 5.97E-04 |
| 0.011 | 0.012 | 0.0117 | 2.84   | 2.47   | 1.99   | 5.98E-04 |
| 3.75  | 2.81  | 3.97   | 0.0103 | 0.0105 | 0.0109 | 5.99E-04 |
| 3.75  | 2.81  | 3.97   | 0.0103 | 0.0105 | 0.0109 | 5.99E-04 |
| 0.011 | 0.012 | 0.0117 | 2.08   | 2.97   | 2.62   | 6.00E-04 |
| 3.05  | 2.93  | 2.17   | 0.0103 | 0.0105 | 0.0109 | 6.02E-04 |
| 3.05  | 2.93  | 2.17   | 0.0103 | 0.0105 | 0.0109 | 6.02E-04 |
| 3.43  | 3.01  | 2.4    | 0.0103 | 0.0105 | 0.0109 | 6.03E-04 |
| 2.54  | 2.77  | 3.53   | 0.0103 | 0.0105 | 0.0109 | 6.04E-04 |
| 2.54  | 2.77  | 3.53   | 0.0103 | 0.0105 | 0.0109 | 6.04E-04 |
| 3.48  | 2.49  | 2.76   | 0.0103 | 0.0105 | 0.0109 | 6.05E-04 |
| 0.011 | 0.012 | 0.0117 | 2.54   | 3.63   | 3.23   | 6.06E-04 |
| 0.011 | 0.012 | 0.0117 | 2.54   | 3.63   | 3.23   | 6.06E-04 |
| 2.86  | 2.42  | 3.44   | 0.0103 | 0.0105 | 0.0109 | 6.07E-04 |
| 2.62  | 3.74  | 3.38   | 0.0103 | 0.0105 | 0.0109 | 6.07E-04 |
| 0.011 | 0.012 | 0.0117 | 2.39   | 3.09   | 3.41   | 6.08E-04 |
| 0.011 | 0.012 | 0.0117 | 2.39   | 3.09   | 3.41   | 6.08E-04 |
| 0.011 | 0.012 | 0.0117 | 2.48   | 3.25   | 2.38   | 6.09E-04 |
| 2.24  | 2.87  | 2.07   | 0.0103 | 0.0105 | 0.0109 | 6.10E-04 |
| 0.011 | 0.012 | 0.0117 | 3.08   | 3.38   | 2.37   | 6.10E-04 |
| 0.011 | 0.012 | 0.0117 | 3.08   | 3.38   | 2.37   | 6.10E-04 |
| 3.9   | 3.91  | 2.82   | 0.0103 | 0.0105 | 0.0109 | 6.15E-04 |
| 0.011 | 0.012 | 0.0117 | 2.97   | 4.01   | 3.01   | 6.19E-04 |
| 2.8   | 2.15  | 3.07   | 0.0103 | 0.0105 | 0.0109 | 6.19E-04 |
| 0.011 | 0.012 | 0.0117 | 3.97   | 2.82   | 3.18   | 6.20E-04 |
| 0.011 | 0.012 | 0.0117 | 3.97   | 2.82   | 3.18   | 6.20E-04 |
| 0.011 | 0.012 | 0.0117 | 3.97   | 2.82   | 3.18   | 6.20E-04 |
| 3.45  | 3.18  | 2.42   | 0.0103 | 0.0105 | 0.0109 | 6.20E-04 |
| 3.32  | 2.32  | 2.83   | 0.0103 | 0.0105 | 0.0109 | 6.22E-04 |
| 3.32  | 2.32  | 2.83   | 0.0103 | 0.0105 | 0.0109 | 6.22E-04 |
| 0.011 | 0.012 | 0.0117 | 3.77   | 2.67   | 3.04   | 6.22E-04 |
| 2.95  | 2.86  | 2.1    | 0.0103 | 0.0105 | 0.0109 | 6.22E-04 |
| 2.95  | 2.86  | 2.1    | 0.0103 | 0.0105 | 0.0109 | 6.22E-04 |
| 0.011 | 0.012 | 0.0117 | 2.75   | 2.86   | 2.03   | 6.22E-04 |
| 4.18  | 2.94  | 3.91   | 0.0103 | 0.0105 | 0.0109 | 6.23E-04 |
| 3.91  | 2.73  | 3.34   | 0.0103 | 0.0105 | 0.0109 | 6.24E-04 |
| 3.91  | 2.73  | 3.34   | 0.0103 | 0.0105 | 0.0109 | 6.24E-04 |
| 3.91  | 2.73  | 3.34   | 0.0103 | 0.0105 | 0.0109 | 6.24E-04 |
| 3.27  | 2.74  | 2.29   | 0.0103 | 0.0105 | 0.0109 | 6.24E-04 |
| 3.27  | 2.74  | 2.29   | 0.0103 | 0.0105 | 0.0109 | 6.24E-04 |
| 0.011 | 0.012 | 0.0117 | 2.4    | 3.36   | 2.65   | 6.30E-04 |
| 4.63  | 3.86  | 3.24   | 0.0103 | 0.0105 | 0.0109 | 6.32E-04 |
| 0.011 | 0.012 | 0.0117 | 3.34   | 3.76   | 2.62   | 6.33E-04 |
| 3.36  | 3.19  | 2.37   | 0.0103 | 0.0105 | 0.0109 | 6.34E-04 |
| 3.36  | 3.19  | 2.37   | 0.0103 | 0.0105 | 0.0109 | 6.34E-04 |
| 0.011 | 0.012 | 0.0117 | 5      | 3.73   | 3.71   | 6.35E-04 |
| 3.49  | 3.2   | 2.44   | 0.0103 | 0.0105 | 0.0109 | 6.35E-04 |
| 0.011 | 0.012 | 0.0117 | 2.78   | 2.7    | 3.68   | 6.37E-04 |
| 0.011 | 0.012 | 0.0117 | 2.78   | 2.7    | 3.68   | 6.37E-04 |
| 2.67  | 2.8   | 3.67   | 0.0103 | 0.0105 | 0.0109 | 6.39E-04 |
| 0.011 | 0.012 | 0.0117 | 2.97   | 2.75   | 2.08   | 6.40E-04 |

|       |       |        |        |        |        |          |
|-------|-------|--------|--------|--------|--------|----------|
| 3.28  | 2.69  | 3.86   | 0.0103 | 0.0105 | 0.0109 | 6.40E-04 |
| 3.28  | 2.69  | 3.86   | 0.0103 | 0.0105 | 0.0109 | 6.40E-04 |
| 5.01  | 5.08  | 5.21   | 4.18   | 3.88   | 4.11   | 6.40E-04 |
| 5.01  | 5.08  | 5.21   | 4.18   | 3.88   | 4.11   | 6.40E-04 |
| 3.5   | 2.44  | 2.96   | 0.0103 | 0.0105 | 0.0109 | 6.42E-04 |
| 3.5   | 2.44  | 2.96   | 0.0103 | 0.0105 | 0.0109 | 6.42E-04 |
| 3.08  | 2.19  | 2.44   | 0.0103 | 0.0105 | 0.0109 | 6.43E-04 |
| 2.96  | 2.57  | 3.65   | 0.0103 | 0.0105 | 0.0109 | 6.43E-04 |
| 2.58  | 3.71  | 3.31   | 0.0103 | 0.0105 | 0.0109 | 6.47E-04 |
| 0.011 | 0.012 | 0.0117 | 2.09   | 2.97   | 2.41   | 6.48E-04 |
| 3.7   | 2.72  | 2.78   | 0.0103 | 0.0105 | 0.0109 | 6.49E-04 |
| 3.7   | 2.72  | 2.78   | 0.0103 | 0.0105 | 0.0109 | 6.49E-04 |
| 2.61  | 3.6   | 3.66   | 0.0103 | 0.0105 | 0.0109 | 6.49E-04 |
| 2.61  | 3.6   | 3.66   | 0.0103 | 0.0105 | 0.0109 | 6.49E-04 |
| 4.69  | 4.82  | 3.42   | 0.0103 | 0.0105 | 0.0109 | 6.51E-04 |
| 4.69  | 4.82  | 3.42   | 0.0103 | 0.0105 | 0.0109 | 6.51E-04 |
| 4.41  | 3.07  | 4      | 0.0103 | 0.0105 | 0.0109 | 6.51E-04 |
| 0.011 | 0.012 | 0.0117 | 2.61   | 3.17   | 3.75   | 6.54E-04 |
| 2.78  | 3.44  | 2.42   | 0.0103 | 0.0105 | 0.0109 | 6.56E-04 |
| 2.89  | 4.15  | 3.79   | 0.0103 | 0.0105 | 0.0109 | 6.56E-04 |
| 0.011 | 0.012 | 0.0117 | 3.39   | 2.43   | 3.38   | 6.59E-04 |
| 4.39  | 4.05  | 3.06   | 0.0103 | 0.0105 | 0.0109 | 6.63E-04 |
| 4.39  | 4.05  | 3.06   | 0.0103 | 0.0105 | 0.0109 | 6.63E-04 |
| 0.011 | 0.012 | 0.0117 | 2.39   | 3.1    | 2.23   | 6.63E-04 |
| 3.09  | 2.2   | 3.04   | 0.0103 | 0.0105 | 0.0109 | 6.63E-04 |
| 0.011 | 0.012 | 0.0117 | 2.64   | 2.57   | 3.51   | 6.65E-04 |
| 0.011 | 0.012 | 0.0117 | 2.64   | 2.57   | 3.51   | 6.65E-04 |
| 3.29  | 2.43  | 2.45   | 0.0103 | 0.0105 | 0.0109 | 6.65E-04 |
| 3.29  | 2.43  | 2.45   | 0.0103 | 0.0105 | 0.0109 | 6.65E-04 |
| 0.011 | 0.012 | 0.0117 | 2.64   | 3.71   | 2.91   | 6.66E-04 |
| 0.011 | 0.012 | 0.0117 | 2.64   | 3.71   | 2.91   | 6.66E-04 |
| 0.011 | 0.012 | 0.0117 | 3.05   | 2.57   | 2.12   | 6.67E-04 |
| 3.69  | 2.72  | 3.87   | 0.0103 | 0.0105 | 0.0109 | 6.67E-04 |
| 0.011 | 0.012 | 0.0117 | 2.53   | 3.43   | 3.6    | 6.68E-04 |
| 0.011 | 0.012 | 0.0117 | 3.42   | 2.5    | 3.54   | 6.68E-04 |
| 0.011 | 0.012 | 0.0117 | 3.42   | 2.5    | 3.54   | 6.68E-04 |
| 0.011 | 0.012 | 0.0117 | 4.54   | 4.47   | 3.23   | 6.68E-04 |
| 3.08  | 2.18  | 2.44   | 0.0103 | 0.0105 | 0.0109 | 6.69E-04 |
| 3.08  | 2.18  | 2.44   | 0.0103 | 0.0105 | 0.0109 | 6.69E-04 |
| 2.68  | 2.98  | 3.78   | 0.0103 | 0.0105 | 0.0109 | 6.71E-04 |
| 2.75  | 3.6   | 2.6    | 0.0103 | 0.0105 | 0.0109 | 6.72E-04 |
| 2.75  | 3.6   | 2.6    | 0.0103 | 0.0105 | 0.0109 | 6.72E-04 |
| 2.75  | 3.6   | 2.6    | 0.0103 | 0.0105 | 0.0109 | 6.72E-04 |
| 3.41  | 3.69  | 2.57   | 0.0103 | 0.0105 | 0.0109 | 6.72E-04 |
| 3.41  | 3.69  | 2.57   | 0.0103 | 0.0105 | 0.0109 | 6.72E-04 |
| 0.011 | 0.012 | 0.0117 | 2.36   | 3.38   | 3.16   | 6.75E-04 |
| 0.011 | 0.012 | 0.0117 | 3.03   | 3.65   | 2.54   | 6.76E-04 |
| 0.011 | 0.012 | 0.0117 | 2.41   | 2.39   | 3.24   | 6.77E-04 |
| 2.66  | 3.81  | 3.57   | 0.0103 | 0.0105 | 0.0109 | 6.78E-04 |
| 3.6   | 2.49  | 3.19   | 0.0103 | 0.0105 | 0.0109 | 6.82E-04 |
| 3.6   | 2.49  | 3.19   | 0.0103 | 0.0105 | 0.0109 | 6.82E-04 |
| 4.33  | 3.23  | 3.18   | 0.0103 | 0.0105 | 0.0109 | 6.82E-04 |
| 4.33  | 3.23  | 3.18   | 0.0103 | 0.0105 | 0.0109 | 6.82E-04 |
| 3.58  | 3.52  | 2.54   | 0.0103 | 0.0105 | 0.0109 | 6.85E-04 |
| 5     | 5.04  | 5.12   | 3.08   | 3.65   | 3.49   | 6.86E-04 |
| 5     | 5.04  | 5.12   | 3.08   | 3.65   | 3.49   | 6.86E-04 |
| 5     | 5.04  | 5.12   | 3.08   | 3.65   | 3.49   | 6.86E-04 |
| 3.27  | 2.26  | 2.84   | 0.0103 | 0.0105 | 0.0109 | 6.86E-04 |

|       |       |        |        |        |        |          |
|-------|-------|--------|--------|--------|--------|----------|
| 4.64  | 4.17  | 3.21   | 0.0103 | 0.0105 | 0.0109 | 6.86E-04 |
| 0.011 | 0.012 | 0.0117 | 3.5    | 3      | 2.42   | 6.88E-04 |
| 2.25  | 3.23  | 2.65   | 0.0103 | 0.0105 | 0.0109 | 6.88E-04 |
| 2.59  | 3.67  | 3.57   | 0.0103 | 0.0105 | 0.0109 | 6.91E-04 |
| 2.98  | 2.75  | 2.07   | 0.0103 | 0.0105 | 0.0109 | 6.91E-04 |
| 2.98  | 2.75  | 2.07   | 0.0103 | 0.0105 | 0.0109 | 6.91E-04 |
| 3.22  | 2.85  | 4.05   | 0.0103 | 0.0105 | 0.0109 | 6.91E-04 |
| 3.22  | 2.85  | 4.05   | 0.0103 | 0.0105 | 0.0109 | 6.91E-04 |
| 3.24  | 2.33  | 3.28   | 0.0103 | 0.0105 | 0.0109 | 6.92E-04 |
| 0.011 | 0.012 | 0.0117 | 2.88   | 4.02   | 3.09   | 6.93E-04 |
| 2.31  | 3.31  | 3.12   | 0.0103 | 0.0105 | 0.0109 | 6.94E-04 |
| 3.08  | 2.86  | 4      | 0.0103 | 0.0105 | 0.0109 | 6.97E-04 |
| 3.08  | 2.86  | 4      | 0.0103 | 0.0105 | 0.0109 | 6.97E-04 |
| 2.86  | 3.1   | 4.01   | 0.0103 | 0.0105 | 0.0109 | 6.97E-04 |
| 0.011 | 0.012 | 0.0117 | 2.48   | 3.2    | 2.28   | 6.98E-04 |
| 0.011 | 0.012 | 0.0117 | 2.48   | 3.2    | 2.28   | 6.98E-04 |
| 3.14  | 4.53  | 3.76   | 0.0103 | 0.0105 | 0.0109 | 6.99E-04 |
| 4.48  | 3.14  | 3.58   | 0.0103 | 0.0105 | 0.0109 | 7.02E-04 |
| 4.48  | 3.14  | 3.58   | 0.0103 | 0.0105 | 0.0109 | 7.02E-04 |
| 2.02  | 2.82  | 2.84   | 0.0103 | 0.0105 | 0.0109 | 7.02E-04 |
| 2.02  | 2.82  | 2.84   | 0.0103 | 0.0105 | 0.0109 | 7.02E-04 |
| 3.4   | 2.46  | 2.57   | 0.0103 | 0.0105 | 0.0109 | 7.04E-04 |
| 3.01  | 2.99  | 2.14   | 0.0103 | 0.0105 | 0.0109 | 7.06E-04 |
| 2.86  | 3.65  | 2.58   | 0.0103 | 0.0105 | 0.0109 | 7.07E-04 |
| 2.86  | 3.65  | 2.58   | 0.0103 | 0.0105 | 0.0109 | 7.07E-04 |
| 3.16  | 2.37  | 3.42   | 0.0103 | 0.0105 | 0.0109 | 7.09E-04 |
| 3.16  | 2.37  | 3.42   | 0.0103 | 0.0105 | 0.0109 | 7.09E-04 |
| 3.16  | 2.37  | 3.42   | 0.0103 | 0.0105 | 0.0109 | 7.09E-04 |
| 4.19  | 3.78  | 2.89   | 0.0103 | 0.0105 | 0.0109 | 7.12E-04 |
| 0.011 | 0.012 | 0.0117 | 4.04   | 2.92   | 3.05   | 7.13E-04 |
| 0.011 | 0.012 | 0.0117 | 4.04   | 2.92   | 3.05   | 7.13E-04 |
| 2.97  | 3.37  | 2.32   | 0.0103 | 0.0105 | 0.0109 | 7.14E-04 |
| 0.011 | 0.012 | 0.0117 | 2.59   | 3.62   | 3.65   | 7.14E-04 |
| 2.43  | 2.5   | 3.34   | 0.0103 | 0.0105 | 0.0109 | 7.16E-04 |
| 2.43  | 2.5   | 3.34   | 0.0103 | 0.0105 | 0.0109 | 7.16E-04 |
| 3.49  | 3.45  | 2.47   | 0.0103 | 0.0105 | 0.0109 | 7.22E-04 |
| 3.22  | 2.34  | 2.41   | 0.0103 | 0.0105 | 0.0109 | 7.23E-04 |
| 2.36  | 2.26  | 3.13   | 0.0103 | 0.0105 | 0.0109 | 7.25E-04 |
| 0.011 | 0.012 | 0.0117 | 2.42   | 3.5    | 2.89   | 7.27E-04 |
| 0.011 | 0.012 | 0.0117 | 2.95   | 2.03   | 2.51   | 7.27E-04 |
| 3.71  | 2.87  | 2.63   | 0.0103 | 0.0105 | 0.0109 | 7.30E-04 |
| 3.39  | 2.33  | 2.89   | 0.0103 | 0.0105 | 0.0109 | 7.32E-04 |
| 3.72  | 4.15  | 3.66   | 2.35   | 2.16   | 2.35   | 7.34E-04 |
| 3.72  | 4.15  | 3.66   | 2.35   | 2.16   | 2.35   | 7.34E-04 |
| 3.52  | 2.8   | 2.46   | 0.0103 | 0.0105 | 0.0109 | 7.34E-04 |
| 3.33  | 2.54  | 2.38   | 0.0103 | 0.0105 | 0.0109 | 7.35E-04 |
| 3.41  | 2.79  | 2.36   | 0.0103 | 0.0105 | 0.0109 | 7.35E-04 |
| 4.14  | 3.58  | 2.84   | 0.0103 | 0.0105 | 0.0109 | 7.37E-04 |
| 4.14  | 3.58  | 2.84   | 0.0103 | 0.0105 | 0.0109 | 7.37E-04 |
| 0.011 | 0.012 | 0.0117 | 2.66   | 3.86   | 3.21   | 7.38E-04 |
| 2.05  | 2.19  | 2.87   | 0.0103 | 0.0105 | 0.0109 | 7.39E-04 |
| 2.05  | 2.19  | 2.87   | 0.0103 | 0.0105 | 0.0109 | 7.39E-04 |
| 4.4   | 4.1   | 4.4    | 3      | 2.99   | 2.65   | 7.39E-04 |
| 3.76  | 2.78  | 2.75   | 0.0103 | 0.0105 | 0.0109 | 7.43E-04 |
| 2.96  | 2.03  | 2.55   | 0.0103 | 0.0105 | 0.0109 | 7.44E-04 |
| 0.011 | 0.012 | 0.0117 | 2.36   | 3.44   | 3.08   | 7.48E-04 |
| 0.011 | 0.012 | 0.0117 | 2.36   | 3.44   | 3.08   | 7.48E-04 |
| 3.84  | 3.5   | 2.64   | 0.0103 | 0.0105 | 0.0109 | 7.48E-04 |

|       |       |        |        |        |        |          |
|-------|-------|--------|--------|--------|--------|----------|
| 3.47  | 2.59  | 3.76   | 0.0103 | 0.0105 | 0.0109 | 7.52E-04 |
| 3.47  | 2.59  | 3.76   | 0.0103 | 0.0105 | 0.0109 | 7.52E-04 |
| 3.7   | 2.55  | 3.04   | 0.0103 | 0.0105 | 0.0109 | 7.55E-04 |
| 0.011 | 0.012 | 0.0117 | 3.5    | 4.23   | 2.91   | 7.56E-04 |
| 0.011 | 0.012 | 0.0117 | 3.5    | 4.23   | 2.91   | 7.56E-04 |
| 2.81  | 3.2   | 2.19   | 0.0103 | 0.0105 | 0.0109 | 7.57E-04 |
| 0.011 | 0.012 | 0.0117 | 3.07   | 2.25   | 2.26   | 7.57E-04 |
| 0.011 | 0.012 | 0.0117 | 3.07   | 2.25   | 2.26   | 7.57E-04 |
| 3.09  | 2.21  | 2.34   | 0.0103 | 0.0105 | 0.0109 | 7.60E-04 |
| 3.09  | 2.21  | 2.34   | 0.0103 | 0.0105 | 0.0109 | 7.60E-04 |
| 2.28  | 3.04  | 2.19   | 0.0103 | 0.0105 | 0.0109 | 7.61E-04 |
| 3.03  | 2.12  | 2.95   | 0.0103 | 0.0105 | 0.0109 | 7.61E-04 |
| 3.2   | 3.24  | 4.39   | 0.0103 | 0.0105 | 0.0109 | 7.67E-04 |
| 0.011 | 0.012 | 0.0117 | 2.94   | 2.43   | 2.02   | 7.71E-04 |
| 0.011 | 0.012 | 0.0117 | 2.8    | 4.1    | 3.64   | 7.75E-04 |
| 0.011 | 0.012 | 0.0117 | 2.8    | 4.1    | 3.64   | 7.75E-04 |
| 3.37  | 3.58  | 2.47   | 0.0103 | 0.0105 | 0.0109 | 7.78E-04 |
| 4.5   | 3.24  | 3.36   | 0.0103 | 0.0105 | 0.0109 | 7.79E-04 |
| 3.84  | 2.69  | 2.99   | 0.0103 | 0.0105 | 0.0109 | 7.81E-04 |
| 3.84  | 2.69  | 2.99   | 0.0103 | 0.0105 | 0.0109 | 7.81E-04 |
| 0.011 | 0.012 | 0.0117 | 3.17   | 3.51   | 2.4    | 7.81E-04 |
| 0.011 | 0.012 | 0.0117 | 3.17   | 3.51   | 2.4    | 7.81E-04 |
| 0.011 | 0.012 | 0.0117 | 2.48   | 3.63   | 3.26   | 7.82E-04 |
| 0.011 | 0.012 | 0.0117 | 2.48   | 3.63   | 3.26   | 7.82E-04 |
| 3.45  | 2.48  | 2.58   | 0.0103 | 0.0105 | 0.0109 | 7.84E-04 |
| 2.71  | 2.55  | 3.58   | 0.0103 | 0.0105 | 0.0109 | 7.84E-04 |
| 2.71  | 2.55  | 3.58   | 0.0103 | 0.0105 | 0.0109 | 7.84E-04 |
| 2.75  | 3.43  | 2.37   | 0.0103 | 0.0105 | 0.0109 | 7.89E-04 |
| 2.75  | 3.43  | 2.37   | 0.0103 | 0.0105 | 0.0109 | 7.89E-04 |
| 4.1   | 3.97  | 2.85   | 0.0103 | 0.0105 | 0.0109 | 7.93E-04 |
| 3.78  | 3.44  | 4.9    | 0.0103 | 0.0105 | 0.0109 | 7.97E-04 |
| 3.78  | 3.44  | 4.9    | 0.0103 | 0.0105 | 0.0109 | 7.97E-04 |
| 2.94  | 3.27  | 2.23   | 0.0103 | 0.0105 | 0.0109 | 7.97E-04 |
| 3.2   | 2.35  | 3.42   | 0.0103 | 0.0105 | 0.0109 | 7.98E-04 |
| 3.2   | 2.35  | 3.42   | 0.0103 | 0.0105 | 0.0109 | 7.98E-04 |
| 0.011 | 0.012 | 0.0117 | 3.29   | 2.58   | 2.29   | 8.03E-04 |
| 4.32  | 3     | 3.4    | 0.0103 | 0.0105 | 0.0109 | 8.03E-04 |
| 4.09  | 4.01  | 4.04   | 2.17   | 2.75   | 2.54   | 8.04E-04 |
| 4.09  | 4.01  | 4.04   | 2.17   | 2.75   | 2.54   | 8.04E-04 |
| 0.011 | 0.012 | 0.0117 | 3.63   | 3.64   | 2.56   | 8.05E-04 |
| 0.011 | 0.012 | 0.0117 | 3.65   | 2.54   | 2.86   | 8.05E-04 |
| 2.36  | 3.44  | 2.8    | 0.0103 | 0.0105 | 0.0109 | 8.06E-04 |
| 2.36  | 3.44  | 2.8    | 0.0103 | 0.0105 | 0.0109 | 8.06E-04 |
| 3.83  | 3.46  | 2.61   | 0.0103 | 0.0105 | 0.0109 | 8.06E-04 |
| 3.5   | 2.99  | 2.38   | 0.0103 | 0.0105 | 0.0109 | 8.09E-04 |
| 3.13  | 2.24  | 2.34   | 0.0103 | 0.0105 | 0.0109 | 8.11E-04 |
| 3.13  | 2.24  | 2.34   | 0.0103 | 0.0105 | 0.0109 | 8.11E-04 |
| 3.34  | 2.86  | 2.27   | 0.0103 | 0.0105 | 0.0109 | 8.12E-04 |
| 3.41  | 2.65  | 2.38   | 0.0103 | 0.0105 | 0.0109 | 8.12E-04 |
| 3.41  | 2.65  | 2.38   | 0.0103 | 0.0105 | 0.0109 | 8.12E-04 |
| 0.011 | 0.012 | 0.0117 | 3.09   | 3.25   | 2.24   | 8.13E-04 |
| 0.011 | 0.012 | 0.0117 | 3.09   | 3.25   | 2.24   | 8.13E-04 |
| 3.54  | 2.47  | 3.48   | 0.0103 | 0.0105 | 0.0109 | 8.15E-04 |
| 3.21  | 2.19  | 2.94   | 0.0103 | 0.0105 | 0.0109 | 8.17E-04 |
| 0.011 | 0.012 | 0.0117 | 3.9    | 3.03   | 2.72   | 8.17E-04 |
| 3.22  | 2.54  | 2.23   | 0.0103 | 0.0105 | 0.0109 | 8.18E-04 |
| 0.011 | 0.012 | 0.0117 | 3.21   | 2.26   | 2.45   | 8.24E-04 |
| 0.011 | 0.012 | 0.0117 | 3.21   | 2.26   | 2.45   | 8.24E-04 |



|       |       |        |        |        |        |          |
|-------|-------|--------|--------|--------|--------|----------|
| 2.81  | 2.04  | 2.06   | 0.0103 | 0.0105 | 0.0109 | 8.27E-04 |
| 2.81  | 2.04  | 2.06   | 0.0103 | 0.0105 | 0.0109 | 8.27E-04 |
| 2.35  | 3.1   | 2.19   | 0.0103 | 0.0105 | 0.0109 | 8.29E-04 |
| 3.11  | 2.65  | 2.11   | 0.0103 | 0.0105 | 0.0109 | 8.29E-04 |
| 4.26  | 3.37  | 2.94   | 0.0103 | 0.0105 | 0.0109 | 8.30E-04 |
| 3.56  | 2.43  | 3.3    | 0.0103 | 0.0105 | 0.0109 | 8.32E-04 |
| 3.56  | 2.43  | 3.3    | 0.0103 | 0.0105 | 0.0109 | 8.32E-04 |
| 0.011 | 0.012 | 0.0117 | 2.6    | 3.76   | 2.96   | 8.33E-04 |
| 0.011 | 0.012 | 0.0117 | 2.6    | 3.76   | 2.96   | 8.33E-04 |
| 3.1   | 2.13  | 2.48   | 0.0103 | 0.0105 | 0.0109 | 8.35E-04 |
| 3.1   | 2.13  | 2.48   | 0.0103 | 0.0105 | 0.0109 | 8.35E-04 |
| 3.1   | 2.13  | 2.48   | 0.0103 | 0.0105 | 0.0109 | 8.35E-04 |
| 0.011 | 0.012 | 0.0117 | 3.02   | 2.35   | 2.1    | 8.35E-04 |
| 0.011 | 0.012 | 0.0117 | 2.04   | 2.67   | 3.01   | 8.38E-04 |
| 0.011 | 0.012 | 0.0117 | 2.04   | 2.67   | 3.01   | 8.38E-04 |
| 3.11  | 3.01  | 2.15   | 0.0103 | 0.0105 | 0.0109 | 8.39E-04 |
| 3.22  | 3.41  | 4.54   | 0.0103 | 0.0105 | 0.0109 | 8.40E-04 |
| 0.011 | 0.012 | 0.0117 | 3.08   | 3.91   | 2.7    | 8.41E-04 |
| 0.011 | 0.012 | 0.0117 | 2.67   | 3.93   | 3.58   | 8.42E-04 |
| 3.21  | 3.48  | 2.37   | 0.0103 | 0.0105 | 0.0109 | 8.42E-04 |
| 2.66  | 3.13  | 2.12   | 0.0103 | 0.0105 | 0.0109 | 8.44E-04 |
| 2.66  | 3.13  | 2.12   | 0.0103 | 0.0105 | 0.0109 | 8.44E-04 |
| 0.011 | 0.012 | 0.0117 | 2.33   | 3.44   | 2.92   | 8.45E-04 |
| 3.56  | 2.48  | 2.75   | 0.0103 | 0.0105 | 0.0109 | 8.45E-04 |
| 3.56  | 2.48  | 2.75   | 0.0103 | 0.0105 | 0.0109 | 8.45E-04 |
| 2.78  | 2.37  | 3.46   | 0.0103 | 0.0105 | 0.0109 | 8.45E-04 |
| 2.78  | 2.37  | 3.46   | 0.0103 | 0.0105 | 0.0109 | 8.45E-04 |
| 4.3   | 3.06  | 3.21   | 0.0103 | 0.0105 | 0.0109 | 8.47E-04 |
| 4.11  | 4.11  | 4.6    | 2.74   | 2.83   | 2.79   | 8.48E-04 |
| 3.33  | 2.33  | 2.55   | 0.0103 | 0.0105 | 0.0109 | 8.49E-04 |
| 3.37  | 3.16  | 3.31   | 2.73   | 2.71   | 2.7    | 8.49E-04 |
| 3.37  | 3.16  | 3.31   | 2.73   | 2.71   | 2.7    | 8.49E-04 |
| 3.43  | 2.92  | 2.32   | 0.0103 | 0.0105 | 0.0109 | 8.52E-04 |
| 3.43  | 2.92  | 2.32   | 0.0103 | 0.0105 | 0.0109 | 8.52E-04 |
| 4.44  | 4.53  | 5.24   | 2.15   | 2.44   | 2.01   | 8.56E-04 |
| 2.31  | 1.99  | 2.9    | 0.0103 | 0.0105 | 0.0109 | 8.56E-04 |
| 0.011 | 0.012 | 0.0117 | 2.41   | 2.89   | 3.54   | 8.57E-04 |
| 0.011 | 0.012 | 0.0117 | 2.6    | 3.68   | 2.77   | 8.57E-04 |
| 0.011 | 0.012 | 0.0117 | 2.6    | 3.68   | 2.77   | 8.57E-04 |
| 2.91  | 3.01  | 2.86   | 2.5    | 2.52   | 2.45   | 8.60E-04 |
| 2.91  | 3.01  | 2.86   | 2.5    | 2.52   | 2.45   | 8.60E-04 |
| 0.011 | 0.012 | 0.0117 | 2.98   | 4.36   | 3.5    | 8.62E-04 |
| 0.011 | 0.012 | 0.0117 | 2.98   | 4.36   | 3.5    | 8.62E-04 |
| 2.83  | 2.28  | 3.37   | 0.0103 | 0.0105 | 0.0109 | 8.62E-04 |
| 3.24  | 2.42  | 2.3    | 0.0103 | 0.0105 | 0.0109 | 8.63E-04 |
| 3.24  | 2.42  | 2.3    | 0.0103 | 0.0105 | 0.0109 | 8.63E-04 |
| 3.24  | 2.3   | 2.42   | 0.0103 | 0.0105 | 0.0109 | 8.63E-04 |
| 0.011 | 0.012 | 0.0117 | 2.58   | 2.23   | 3.25   | 8.66E-04 |
| 3.08  | 3.08  | 4.24   | 0.0103 | 0.0105 | 0.0109 | 8.66E-04 |
| 3.72  | 3.58  | 5.02   | 0.0103 | 0.0105 | 0.0109 | 8.68E-04 |
| 3.72  | 3.58  | 5.02   | 0.0103 | 0.0105 | 0.0109 | 8.68E-04 |
| 3.72  | 3.58  | 5.02   | 0.0103 | 0.0105 | 0.0109 | 8.68E-04 |
| 3.2   | 2.39  | 2.27   | 0.0103 | 0.0105 | 0.0109 | 8.68E-04 |
| 2.94  | 2.26  | 3.35   | 0.0103 | 0.0105 | 0.0109 | 8.68E-04 |
| 2.94  | 2.26  | 3.35   | 0.0103 | 0.0105 | 0.0109 | 8.68E-04 |
| 2.41  | 2.75  | 3.5    | 0.0103 | 0.0105 | 0.0109 | 8.69E-04 |
| 3.38  | 2.28  | 2.9    | 0.0103 | 0.0105 | 0.0109 | 8.70E-04 |
| 0.011 | 0.012 | 0.0117 | 2.83   | 2.7    | 3.8    | 8.70E-04 |

|       |       |        |        |        |        |          |
|-------|-------|--------|--------|--------|--------|----------|
| 3.49  | 3.28  | 2.38   | 0.0103 | 0.0105 | 0.0109 | 8.70E-04 |
| 2.8   | 3.15  | 4.05   | 0.0103 | 0.0105 | 0.0109 | 8.71E-04 |
| 2.8   | 3.15  | 4.05   | 0.0103 | 0.0105 | 0.0109 | 8.71E-04 |
| 3.54  | 3.56  | 4.89   | 0.0103 | 0.0105 | 0.0109 | 8.72E-04 |
| 3.54  | 3.56  | 4.89   | 0.0103 | 0.0105 | 0.0109 | 8.72E-04 |
| 3.54  | 3.56  | 4.89   | 0.0103 | 0.0105 | 0.0109 | 8.72E-04 |
| 3.53  | 2.38  | 3.09   | 0.0103 | 0.0105 | 0.0109 | 8.72E-04 |
| 3.58  | 2.45  | 3.41   | 0.0103 | 0.0105 | 0.0109 | 8.75E-04 |
| 2.78  | 3.06  | 2.07   | 0.0103 | 0.0105 | 0.0109 | 8.76E-04 |
| 2.49  | 3.66  | 3.42   | 0.0103 | 0.0105 | 0.0109 | 8.77E-04 |
| 2.49  | 3.66  | 3.42   | 0.0103 | 0.0105 | 0.0109 | 8.77E-04 |
| 4.25  | 3     | 4.34   | 0.0103 | 0.0105 | 0.0109 | 8.77E-04 |
| 2.25  | 3.02  | 2.14   | 0.0103 | 0.0105 | 0.0109 | 8.87E-04 |
| 2.25  | 3.02  | 2.14   | 0.0103 | 0.0105 | 0.0109 | 8.87E-04 |
| 3.44  | 2.52  | 2.47   | 0.0103 | 0.0105 | 0.0109 | 8.89E-04 |
| 3.44  | 2.52  | 2.47   | 0.0103 | 0.0105 | 0.0109 | 8.89E-04 |
| 0.011 | 0.012 | 0.0117 | 4.48   | 3.16   | 4.58   | 8.90E-04 |
| 4.72  | 4.24  | 3.18   | 0.0103 | 0.0105 | 0.0109 | 8.92E-04 |
| 0.011 | 0.012 | 0.0117 | 2.64   | 3.56   | 3.91   | 8.93E-04 |
| 3     | 2.93  | 4.09   | 0.0103 | 0.0105 | 0.0109 | 8.94E-04 |
| 3.59  | 2.81  | 4.18   | 0.0103 | 0.0105 | 0.0109 | 8.95E-04 |
| 3.59  | 2.81  | 4.18   | 0.0103 | 0.0105 | 0.0109 | 8.95E-04 |
| 0.011 | 0.012 | 0.0117 | 3.35   | 2.47   | 2.39   | 8.96E-04 |
| 3.56  | 2.47  | 3.54   | 0.0103 | 0.0105 | 0.0109 | 9.08E-04 |
| 4.21  | 2.83  | 3.77   | 0.0103 | 0.0105 | 0.0109 | 9.09E-04 |
| 4.21  | 2.83  | 3.77   | 0.0103 | 0.0105 | 0.0109 | 9.09E-04 |
| 3.07  | 4.27  | 3.11   | 0.0103 | 0.0105 | 0.0109 | 9.10E-04 |
| 0.011 | 0.012 | 0.0117 | 3.31   | 2.24   | 2.69   | 9.13E-04 |
| 0.011 | 0.012 | 0.0117 | 3.17   | 2.14   | 2.92   | 9.17E-04 |
| 0.011 | 0.012 | 0.0117 | 2.39   | 3.46   | 2.66   | 9.22E-04 |
| 0.011 | 0.012 | 0.0117 | 3.76   | 2.53   | 3.11   | 9.25E-04 |
| 3.37  | 2.32  | 3.31   | 0.0103 | 0.0105 | 0.0109 | 9.28E-04 |
| 0.011 | 0.012 | 0.0117 | 2.52   | 3.39   | 2.39   | 9.29E-04 |
| 3.58  | 2.4   | 3.02   | 0.0103 | 0.0105 | 0.0109 | 9.31E-04 |
| 3.54  | 2.47  | 3.58   | 0.0103 | 0.0105 | 0.0109 | 9.34E-04 |
| 2.34  | 2.62  | 3.4    | 0.0103 | 0.0105 | 0.0109 | 9.39E-04 |
| 2.31  | 2.51  | 3.32   | 0.0103 | 0.0105 | 0.0109 | 9.39E-04 |
| 2.31  | 2.51  | 3.32   | 0.0103 | 0.0105 | 0.0109 | 9.39E-04 |
| 3.3   | 2.21  | 2.79   | 0.0103 | 0.0105 | 0.0109 | 9.39E-04 |
| 3.3   | 2.21  | 2.79   | 0.0103 | 0.0105 | 0.0109 | 9.39E-04 |
| 0.011 | 0.012 | 0.0117 | 2.5    | 3.71   | 3.02   | 9.42E-04 |
| 0.011 | 0.012 | 0.0117 | 3.31   | 2.36   | 2.42   | 9.44E-04 |
| 2.71  | 2.99  | 3.92   | 0.0103 | 0.0105 | 0.0109 | 9.45E-04 |
| 0.011 | 0.012 | 0.0117 | 3.15   | 2.96   | 2.13   | 9.47E-04 |
| 0.011 | 0.012 | 0.0117 | 3.15   | 2.96   | 2.13   | 9.47E-04 |
| 2.54  | 2.43  | 3.44   | 0.0103 | 0.0105 | 0.0109 | 9.49E-04 |
| 2.23  | 3.24  | 3.2    | 0.0103 | 0.0105 | 0.0109 | 9.53E-04 |
| 2.23  | 3.24  | 3.2    | 0.0103 | 0.0105 | 0.0109 | 9.53E-04 |
| 5.17  | 4.15  | 3.49   | 0.0103 | 0.0105 | 0.0109 | 9.54E-04 |
| 3.82  | 2.58  | 3.6    | 0.0103 | 0.0105 | 0.0109 | 9.62E-04 |
| 3.82  | 2.58  | 3.6    | 0.0103 | 0.0105 | 0.0109 | 9.62E-04 |
| 4.2   | 3.88  | 2.82   | 0.0103 | 0.0105 | 0.0109 | 9.67E-04 |
| 4.2   | 3.88  | 2.82   | 0.0103 | 0.0105 | 0.0109 | 9.67E-04 |
| 0.011 | 0.012 | 0.0117 | 2.96   | 2.26   | 2.04   | 9.68E-04 |
| 0.011 | 0.012 | 0.0117 | 2.47   | 3.43   | 2.47   | 9.68E-04 |
| 3.6   | 2.54  | 2.65   | 0.0103 | 0.0105 | 0.0109 | 9.71E-04 |
| 3.6   | 2.54  | 2.65   | 0.0103 | 0.0105 | 0.0109 | 9.71E-04 |
| 3.52  | 2.45  | 2.64   | 0.0103 | 0.0105 | 0.0109 | 9.71E-04 |

|       |       |        |        |        |        |          |
|-------|-------|--------|--------|--------|--------|----------|
| 3.31  | 3.11  | 2.23   | 0.0103 | 0.0105 | 0.0109 | 9.78E-04 |
| 3.56  | 2.66  | 2.48   | 0.0103 | 0.0105 | 0.0109 | 9.83E-04 |
| 3.56  | 2.66  | 2.48   | 0.0103 | 0.0105 | 0.0109 | 9.83E-04 |
| 2.67  | 3.97  | 3.72   | 0.0103 | 0.0105 | 0.0109 | 9.85E-04 |
| 2.67  | 3.97  | 3.72   | 0.0103 | 0.0105 | 0.0109 | 9.85E-04 |
| 2.67  | 3.97  | 3.72   | 0.0103 | 0.0105 | 0.0109 | 9.85E-04 |
| 4.51  | 5.19  | 5.13   | 2.81   | 3.09   | 2.81   | 9.94E-04 |
| 0.011 | 0.012 | 0.0117 | 2.78   | 3.74   | 2.61   | 9.96E-04 |
| 0.011 | 0.012 | 0.0117 | 2.78   | 3.74   | 2.61   | 9.96E-04 |
| 4.2   | 3.02  | 3.01   | 0.0103 | 0.0105 | 0.0109 | 1.00E-03 |
| 4.2   | 3.02  | 3.01   | 0.0103 | 0.0105 | 0.0109 | 1.00E-03 |
| 3.29  | 3.33  | 2.28   | 0.0103 | 0.0105 | 0.0109 | 1.00E-03 |
| 3.29  | 3.33  | 2.28   | 0.0103 | 0.0105 | 0.0109 | 1.00E-03 |
| 4.69  | 3.53  | 3.24   | 0.0103 | 0.0105 | 0.0109 | 1.00E-03 |
| 4.69  | 3.53  | 3.24   | 0.0103 | 0.0105 | 0.0109 | 1.00E-03 |
| 4.69  | 3.53  | 3.24   | 0.0103 | 0.0105 | 0.0109 | 1.00E-03 |
| 2.44  | 2.25  | 3.25   | 0.0103 | 0.0105 | 0.0109 | 1.01E-03 |
| 3.83  | 2.61  | 3.75   | 0.0103 | 0.0105 | 0.0109 | 1.01E-03 |
| 4.04  | 3.24  | 2.71   | 0.0103 | 0.0105 | 0.0109 | 1.01E-03 |
| 3.98  | 4.05  | 3.62   | 2.7    | 2.76   | 2.73   | 1.01E-03 |
| 3.98  | 4.05  | 3.62   | 2.7    | 2.76   | 2.73   | 1.01E-03 |
| 2.38  | 3.57  | 3.27   | 0.0103 | 0.0105 | 0.0109 | 1.02E-03 |
| 0.011 | 0.012 | 0.0117 | 2.28   | 3.43   | 2.86   | 1.02E-03 |
| 3.88  | 2.84  | 2.73   | 0.0103 | 0.0105 | 0.0109 | 1.02E-03 |
| 3.1   | 3.37  | 3.27   | 2.46   | 2.36   | 2.53   | 1.02E-03 |
| 3.1   | 3.37  | 3.27   | 2.46   | 2.36   | 2.53   | 1.02E-03 |
| 2.88  | 2.27  | 3.42   | 0.0103 | 0.0105 | 0.0109 | 1.02E-03 |
| 4.42  | 4.36  | 4.28   | 2.93   | 2.97   | 2.41   | 1.02E-03 |
| 4.42  | 4.36  | 4.28   | 2.93   | 2.97   | 2.41   | 1.02E-03 |
| 3.55  | 2.42  | 3.49   | 0.0103 | 0.0105 | 0.0109 | 1.02E-03 |
| 4.54  | 4.69  | 4.22   | 2.11   | 2.78   | 2.27   | 1.02E-03 |
| 0.011 | 0.012 | 0.0117 | 2.92   | 2.13   | 3.2    | 1.03E-03 |
| 0.011 | 0.012 | 0.0117 | 2.92   | 2.13   | 3.2    | 1.03E-03 |
| 0.011 | 0.012 | 0.0117 | 2.92   | 2.13   | 3.2    | 1.03E-03 |
| 0.011 | 0.012 | 0.0117 | 2.32   | 3.47   | 2.79   | 1.04E-03 |
| 4.33  | 3.18  | 3.03   | 0.0103 | 0.0105 | 0.0109 | 1.04E-03 |
| 4.33  | 3.18  | 3.03   | 0.0103 | 0.0105 | 0.0109 | 1.04E-03 |
| 3.54  | 2.56  | 2.51   | 0.0103 | 0.0105 | 0.0109 | 1.04E-03 |
| 3.14  | 2.11  | 2.99   | 0.0103 | 0.0105 | 0.0109 | 1.04E-03 |
| 4.24  | 4.58  | 3.05   | 0.0103 | 0.0105 | 0.0109 | 1.05E-03 |
| 0.011 | 0.012 | 0.0117 | 3.21   | 2.81   | 4.15   | 1.05E-03 |
| 2.97  | 2.14  | 2.11   | 0.0103 | 0.0105 | 0.0109 | 1.05E-03 |
| 4.4   | 4.83  | 4.59   | 2.33   | 3      | 2.6    | 1.05E-03 |
| 4.4   | 4.83  | 4.59   | 2.33   | 3      | 2.6    | 1.05E-03 |
| 0.011 | 0.012 | 0.0117 | 3.41   | 3.36   | 2.32   | 1.05E-03 |
| 0.011 | 0.012 | 0.0117 | 3.31   | 2.42   | 2.32   | 1.05E-03 |
| 0.011 | 0.012 | 0.0117 | 3.31   | 2.42   | 2.32   | 1.05E-03 |
| 3.555 | 2.365 | 3.285  | 0.0103 | 0.0105 | 0.0109 | 1.06E-03 |
| 0.011 | 0.012 | 0.0117 | 2.51   | 2.92   | 3.73   | 1.06E-03 |
| 0.011 | 0.012 | 0.0117 | 2.51   | 2.92   | 3.73   | 1.06E-03 |
| 0.011 | 0.012 | 0.0117 | 3.33   | 3.36   | 2.29   | 1.06E-03 |
| 0.011 | 0.012 | 0.0117 | 3.33   | 3.36   | 2.29   | 1.06E-03 |
| 0.011 | 0.012 | 0.0117 | 2.27   | 2.93   | 3.44   | 1.07E-03 |
| 3.82  | 3.25  | 2.52   | 0.0103 | 0.0105 | 0.0109 | 1.07E-03 |
| 3.82  | 3.25  | 2.52   | 0.0103 | 0.0105 | 0.0109 | 1.07E-03 |
| 3.75  | 3     | 2.5    | 0.0103 | 0.0105 | 0.0109 | 1.07E-03 |
| 0.011 | 0.012 | 0.0117 | 2.43   | 3.67   | 3.34   | 1.07E-03 |
| 2.8   | 3.02  | 4.06   | 0.0103 | 0.0105 | 0.0109 | 1.08E-03 |

|       |       |        |        |        |        |          |
|-------|-------|--------|--------|--------|--------|----------|
| 2.31  | 3.29  | 2.39   | 0.0103 | 0.0105 | 0.0109 | 1.08E-03 |
| 2.31  | 3.29  | 2.39   | 0.0103 | 0.0105 | 0.0109 | 1.08E-03 |
| 0.011 | 0.012 | 0.0117 | 2.64   | 3.45   | 2.34   | 1.08E-03 |
| 3.15  | 2.83  | 2.08   | 0.0103 | 0.0105 | 0.0109 | 1.08E-03 |
| 2.8   | 2.59  | 3.76   | 0.0103 | 0.0105 | 0.0109 | 1.08E-03 |
| 2.8   | 2.59  | 3.76   | 0.0103 | 0.0105 | 0.0109 | 1.08E-03 |
| 2.8   | 2.59  | 3.76   | 0.0103 | 0.0105 | 0.0109 | 1.08E-03 |
| 0.011 | 0.012 | 0.0117 | 4.22   | 3.47   | 2.79   | 1.08E-03 |
| 0.011 | 0.012 | 0.0117 | 4.22   | 3.47   | 2.79   | 1.08E-03 |
| 3.14  | 2.56  | 2.08   | 0.0103 | 0.0105 | 0.0109 | 1.09E-03 |
| 3.14  | 2.56  | 2.08   | 0.0103 | 0.0105 | 0.0109 | 1.09E-03 |
| 4.05  | 4.62  | 3.04   | 0.0103 | 0.0105 | 0.0109 | 1.09E-03 |
| 3.16  | 2.33  | 2.19   | 0.0103 | 0.0105 | 0.0109 | 1.09E-03 |
| 3.16  | 2.33  | 2.19   | 0.0103 | 0.0105 | 0.0109 | 1.09E-03 |
| 3.16  | 2.33  | 2.19   | 0.0103 | 0.0105 | 0.0109 | 1.09E-03 |
| 3.86  | 2.76  | 4.16   | 0.0103 | 0.0105 | 0.0109 | 1.09E-03 |
| 0.011 | 0.012 | 0.0117 | 2.94   | 4.42   | 3.53   | 1.09E-03 |
| 2.4   | 3.18  | 3.65   | 0.0103 | 0.0105 | 0.0109 | 1.09E-03 |
| 0.011 | 0.012 | 0.0117 | 3.99   | 3.32   | 2.63   | 1.09E-03 |
| 3.01  | 4.41  | 3.32   | 0.0103 | 0.0105 | 0.0109 | 1.10E-03 |
| 3.01  | 4.41  | 3.32   | 0.0103 | 0.0105 | 0.0109 | 1.10E-03 |
| 3.21  | 2.77  | 2.11   | 0.0103 | 0.0105 | 0.0109 | 1.10E-03 |
| 3.21  | 2.77  | 2.11   | 0.0103 | 0.0105 | 0.0109 | 1.10E-03 |
| 0.011 | 0.012 | 0.0117 | 2.94   | 3.55   | 4.43   | 1.10E-03 |
| 0.011 | 0.012 | 0.0117 | 2.94   | 3.55   | 4.43   | 1.10E-03 |
| 3.25  | 2.44  | 2.22   | 0.0103 | 0.0105 | 0.0109 | 1.11E-03 |
| 3.25  | 2.44  | 2.22   | 0.0103 | 0.0105 | 0.0109 | 1.11E-03 |
| 3.38  | 3.08  | 2.23   | 0.0103 | 0.0105 | 0.0109 | 1.11E-03 |
| 0.011 | 0.012 | 0.0117 | 3.91   | 3.78   | 2.62   | 1.12E-03 |
| 0.011 | 0.012 | 0.0117 | 3.91   | 3.78   | 2.62   | 1.12E-03 |
| 2.75  | 2.62  | 3.77   | 0.0103 | 0.0105 | 0.0109 | 1.12E-03 |
| 2.75  | 2.62  | 3.77   | 0.0103 | 0.0105 | 0.0109 | 1.12E-03 |
| 2.75  | 2.62  | 3.77   | 0.0103 | 0.0105 | 0.0109 | 1.12E-03 |
| 2.75  | 2.62  | 3.77   | 0.0103 | 0.0105 | 0.0109 | 1.12E-03 |
| 3.72  | 2.44  | 3.12   | 0.0103 | 0.0105 | 0.0109 | 1.13E-03 |
| 3.72  | 2.44  | 3.12   | 0.0103 | 0.0105 | 0.0109 | 1.13E-03 |
| 4.36  | 3.15  | 3.05   | 0.0103 | 0.0105 | 0.0109 | 1.13E-03 |
| 0.011 | 0.012 | 0.0117 | 2.25   | 3.31   | 3.31   | 1.13E-03 |
| 0.011 | 0.012 | 0.0117 | 2.25   | 3.31   | 3.31   | 1.13E-03 |
| 0.011 | 0.012 | 0.0117 | 2.01   | 3.02   | 2.87   | 1.13E-03 |
| 3.02  | 2.21  | 2.09   | 0.0103 | 0.0105 | 0.0109 | 1.14E-03 |
| 0.011 | 0.012 | 0.0117 | 2.2    | 3.26   | 3.22   | 1.15E-03 |
| 3.54  | 3.86  | 2.54   | 0.0103 | 0.0105 | 0.0109 | 1.15E-03 |
| 4.02  | 2.63  | 3.54   | 0.0103 | 0.0105 | 0.0109 | 1.15E-03 |
| 4.02  | 2.63  | 3.54   | 0.0103 | 0.0105 | 0.0109 | 1.15E-03 |
| 4.11  | 3.07  | 2.8    | 0.0103 | 0.0105 | 0.0109 | 1.15E-03 |
| 4.11  | 3.07  | 2.8    | 0.0103 | 0.0105 | 0.0109 | 1.15E-03 |
| 0.011 | 0.012 | 0.0117 | 3.23   | 2.34   | 2.25   | 1.15E-03 |
| 0.011 | 0.012 | 0.0117 | 2.16   | 2.5    | 3.23   | 1.15E-03 |
| 0.011 | 0.012 | 0.0117 | 2.16   | 2.5    | 3.23   | 1.15E-03 |
| 0.011 | 0.012 | 0.0117 | 3.71   | 2.43   | 3.33   | 1.16E-03 |
| 2.42  | 2.85  | 3.64   | 0.0103 | 0.0105 | 0.0109 | 1.16E-03 |
| 2.42  | 2.85  | 3.64   | 0.0103 | 0.0105 | 0.0109 | 1.16E-03 |
| 0.011 | 0.012 | 0.0117 | 2.21   | 3.13   | 3.35   | 1.17E-03 |
| 3.69  | 3.53  | 3.49   | 3.07   | 3.01   | 2.98   | 1.17E-03 |
| 3.69  | 3.53  | 3.49   | 3.07   | 3.01   | 2.98   | 1.17E-03 |
| 2.39  | 2.87  | 3.62   | 0.0103 | 0.0105 | 0.0109 | 1.18E-03 |
| 3.91  | 3.2   | 2.56   | 0.0103 | 0.0105 | 0.0109 | 1.18E-03 |

|       |       |        |        |        |        |          |
|-------|-------|--------|--------|--------|--------|----------|
| 3.48  | 2.35  | 2.62   | 0.0103 | 0.0105 | 0.0109 | 1.18E-03 |
| 3.48  | 2.35  | 2.62   | 0.0103 | 0.0105 | 0.0109 | 1.18E-03 |
| 3.66  | 2.57  | 3.9    | 0.0103 | 0.0105 | 0.0109 | 1.19E-03 |
| 3.4   | 2.59  | 2.28   | 0.0103 | 0.0105 | 0.0109 | 1.19E-03 |
| 0.011 | 0.012 | 0.0117 | 3.25   | 2.4    | 2.22   | 1.19E-03 |
| 3.32  | 2.5   | 2.24   | 0.0103 | 0.0105 | 0.0109 | 1.19E-03 |
| 3.32  | 2.5   | 2.24   | 0.0103 | 0.0105 | 0.0109 | 1.19E-03 |
| 4.61  | 3.09  | 3.51   | 0.0103 | 0.0105 | 0.0109 | 1.19E-03 |
| 2.01  | 3.06  | 2.46   | 0.0103 | 0.0105 | 0.0109 | 1.20E-03 |
| 2.55  | 2.4   | 3.49   | 0.0103 | 0.0105 | 0.0109 | 1.20E-03 |
| 2.55  | 2.4   | 3.49   | 0.0103 | 0.0105 | 0.0109 | 1.20E-03 |
| 2.48  | 3.81  | 3.23   | 0.0103 | 0.0105 | 0.0109 | 1.20E-03 |
| 2.48  | 3.81  | 3.23   | 0.0103 | 0.0105 | 0.0109 | 1.20E-03 |
| 3.41  | 2.22  | 2.89   | 0.0103 | 0.0105 | 0.0109 | 1.20E-03 |
| 0.011 | 0.012 | 0.0117 | 2.71   | 4.16   | 3.69   | 1.20E-03 |
| 3.55  | 4.09  | 2.66   | 0.0103 | 0.0105 | 0.0109 | 1.20E-03 |
| 3.55  | 4.09  | 2.66   | 0.0103 | 0.0105 | 0.0109 | 1.20E-03 |
| 0.011 | 0.012 | 0.0117 | 2.61   | 3.97   | 3.17   | 1.20E-03 |
| 2.81  | 1.86  | 2.68   | 0.0103 | 0.0105 | 0.0109 | 1.20E-03 |
| 3.63  | 3.32  | 3.64   | 2.35   | 2.43   | 2.61   | 1.21E-03 |
| 3.63  | 3.32  | 3.64   | 2.35   | 2.43   | 2.61   | 1.21E-03 |
| 3.63  | 3.32  | 3.64   | 2.35   | 2.43   | 2.61   | 1.21E-03 |
| 2.86  | 3.16  | 4.23   | 0.0103 | 0.0105 | 0.0109 | 1.21E-03 |
| 0.011 | 0.012 | 0.0117 | 2.19   | 3.37   | 2.91   | 1.21E-03 |
| 3.41  | 3.86  | 2.51   | 0.0103 | 0.0105 | 0.0109 | 1.21E-03 |
| 0.011 | 0.012 | 0.0117 | 2.61   | 3.97   | 3.72   | 1.21E-03 |
| 0.011 | 0.012 | 0.0117 | 2.61   | 3.97   | 3.72   | 1.21E-03 |
| 4.29  | 4.69  | 4.68   | 2.92   | 3.12   | 3.32   | 1.21E-03 |
| 4.29  | 4.69  | 4.68   | 2.92   | 3.12   | 3.32   | 1.21E-03 |
| 4.29  | 4.69  | 4.68   | 2.92   | 3.12   | 3.32   | 1.21E-03 |
| 3.24  | 2.69  | 2.11   | 0.0103 | 0.0105 | 0.0109 | 1.22E-03 |
| 0.011 | 0.012 | 0.0117 | 3.15   | 3.11   | 2.11   | 1.22E-03 |
| 3.8   | 5.05  | 3.39   | 0.0103 | 0.0105 | 0.0109 | 1.23E-03 |
| 2.73  | 3.66  | 2.47   | 0.0103 | 0.0105 | 0.0109 | 1.24E-03 |
| 3.89  | 2.52  | 3.39   | 0.0103 | 0.0105 | 0.0109 | 1.24E-03 |
| 2.25  | 2.18  | 3.14   | 0.0103 | 0.0105 | 0.0109 | 1.24E-03 |
| 3.15  | 2.04  | 2.67   | 0.0103 | 0.0105 | 0.0109 | 1.25E-03 |
| 3.15  | 2.04  | 2.67   | 0.0103 | 0.0105 | 0.0109 | 1.25E-03 |
| 2.73  | 2.85  | 3.96   | 0.0103 | 0.0105 | 0.0109 | 1.27E-03 |
| 2.73  | 2.85  | 3.96   | 0.0103 | 0.0105 | 0.0109 | 1.27E-03 |
| 0.011 | 0.012 | 0.0117 | 2.35   | 2.92   | 3.61   | 1.27E-03 |
| 0.011 | 0.012 | 0.0117 | 2.35   | 2.92   | 3.61   | 1.27E-03 |
| 0.011 | 0.012 | 0.0117 | 2.22   | 3.04   | 3.43   | 1.27E-03 |
| 3.36  | 3.05  | 2.18   | 0.0103 | 0.0105 | 0.0109 | 1.28E-03 |
| 0.011 | 0.012 | 0.0117 | 2.09   | 2.99   | 3.2    | 1.28E-03 |
| 0.011 | 0.012 | 0.0117 | 2.09   | 2.99   | 3.2    | 1.28E-03 |
| 0.011 | 0.012 | 0.0117 | 2.64   | 3.17   | 4.03   | 1.28E-03 |
| 2.65  | 3.8   | 4.06   | 0.0103 | 0.0105 | 0.0109 | 1.29E-03 |
| 0.011 | 0.012 | 0.0117 | 3.21   | 2.35   | 2.18   | 1.29E-03 |
| 3.15  | 4.25  | 2.86   | 0.0103 | 0.0105 | 0.0109 | 1.29E-03 |
| 3.29  | 2.6   | 2.15   | 0.0103 | 0.0105 | 0.0109 | 1.29E-03 |
| 2.87  | 4.08  | 2.86   | 0.0103 | 0.0105 | 0.0109 | 1.29E-03 |
| 2.22  | 3.44  | 3.05   | 0.0103 | 0.0105 | 0.0109 | 1.30E-03 |
| 0.011 | 0.012 | 0.0117 | 2.73   | 2.09   | 3.24   | 1.30E-03 |
| 0.011 | 0.012 | 0.0117 | 2.77   | 3.61   | 2.38   | 1.31E-03 |
| 0.011 | 0.012 | 0.0117 | 2.16   | 3.24   | 2.43   | 1.32E-03 |
| 0.011 | 0.012 | 0.0117 | 3.14   | 2.29   | 2.13   | 1.32E-03 |
| 2.26  | 2.77  | 3.48   | 0.0103 | 0.0105 | 0.0109 | 1.33E-03 |

|       |       |        |        |        |        |          |
|-------|-------|--------|--------|--------|--------|----------|
| 2.26  | 2.77  | 3.48   | 0.0103 | 0.0105 | 0.0109 | 1.33E-03 |
| 0.011 | 0.012 | 0.0117 | 2.52   | 3.83   | 2.94   | 1.33E-03 |
| 0.011 | 0.012 | 0.0117 | 2.52   | 3.83   | 2.94   | 1.33E-03 |
| 3.94  | 2.53  | 3.41   | 0.0103 | 0.0105 | 0.0109 | 1.33E-03 |
| 3.6   | 3.46  | 2.36   | 0.0103 | 0.0105 | 0.0109 | 1.34E-03 |
| 3.06  | 2.13  | 3.28   | 0.0103 | 0.0105 | 0.0109 | 1.34E-03 |
| 3.38  | 3.8   | 3.64   | 2.63   | 2.54   | 2.44   | 1.34E-03 |
| 2.99  | 2.55  | 1.92   | 0.0103 | 0.0105 | 0.0109 | 1.34E-03 |
| 0.011 | 0.012 | 0.0117 | 2.51   | 3.08   | 3.87   | 1.34E-03 |
| 0.011 | 0.012 | 0.0117 | 4.08   | 2.7    | 3.08   | 1.35E-03 |
| 0.011 | 0.012 | 0.0117 | 4.08   | 2.7    | 3.08   | 1.35E-03 |
| 5.13  | 3.34  | 4.86   | 0.0103 | 0.0105 | 0.0109 | 1.35E-03 |
| 2.29  | 3.57  | 3.02   | 0.0103 | 0.0105 | 0.0109 | 1.35E-03 |
| 0.011 | 0.012 | 0.0117 | 2.7    | 2.67   | 3.84   | 1.36E-03 |
| 0.011 | 0.012 | 0.0117 | 2.7    | 2.67   | 3.84   | 1.36E-03 |
| 3.79  | 2.53  | 2.81   | 0.0103 | 0.0105 | 0.0109 | 1.36E-03 |
| 3.79  | 2.53  | 2.81   | 0.0103 | 0.0105 | 0.0109 | 1.36E-03 |
| 2.65  | 3.96  | 2.92   | 0.0103 | 0.0105 | 0.0109 | 1.37E-03 |
| 4.07  | 2.66  | 3.14   | 0.0103 | 0.0105 | 0.0109 | 1.37E-03 |
| 3.57  | 3.33  | 2.31   | 0.0103 | 0.0105 | 0.0109 | 1.38E-03 |
| 3.57  | 3.33  | 2.31   | 0.0103 | 0.0105 | 0.0109 | 1.38E-03 |
| 3.16  | 3.94  | 2.54   | 0.0103 | 0.0105 | 0.0109 | 1.38E-03 |
| 3.57  | 3.49  | 3.63   | 2.62   | 2.37   | 2.77   | 1.38E-03 |
| 0.011 | 0.012 | 0.0117 | 3.63   | 2.43   | 2.67   | 1.38E-03 |
| 0.011 | 0.012 | 0.0117 | 2.52   | 3.83   | 2.9    | 1.39E-03 |
| 0.011 | 0.012 | 0.0117 | 2.52   | 3.83   | 2.9    | 1.39E-03 |
| 0.011 | 0.012 | 0.0117 | 2.52   | 3.83   | 2.9    | 1.39E-03 |
| 3.96  | 3.6   | 3.6    | 2.59   | 2.76   | 2.72   | 1.39E-03 |
| 3.96  | 3.6   | 3.6    | 2.59   | 2.76   | 2.72   | 1.39E-03 |
| 0.011 | 0.012 | 0.0117 | 3.25   | 2.51   | 2.12   | 1.39E-03 |
| 2.2   | 3.42  | 3.14   | 0.0103 | 0.0105 | 0.0109 | 1.40E-03 |
| 2.2   | 3.42  | 3.14   | 0.0103 | 0.0105 | 0.0109 | 1.40E-03 |
| 0.011 | 0.012 | 0.0117 | 3.43   | 2.37   | 3.67   | 1.41E-03 |
| 0.011 | 0.012 | 0.0117 | 2.73   | 4.13   | 3.09   | 1.41E-03 |
| 0.011 | 0.012 | 0.0117 | 2.73   | 4.13   | 3.09   | 1.41E-03 |
| 2.25  | 3.13  | 3.52   | 0.0103 | 0.0105 | 0.0109 | 1.41E-03 |
| 0.011 | 0.012 | 0.0117 | 2.96   | 4.09   | 2.76   | 1.41E-03 |
| 3.88  | 3.14  | 2.49   | 0.0103 | 0.0105 | 0.0109 | 1.41E-03 |
| 4.53  | 4.65  | 5.02   | 3.45   | 3.5    | 3.22   | 1.41E-03 |
| 4.53  | 4.65  | 5.02   | 3.45   | 3.5    | 3.22   | 1.41E-03 |
| 4.53  | 4.65  | 5.02   | 3.45   | 3.5    | 3.22   | 1.41E-03 |
| 3.09  | 3.56  | 2.27   | 0.0103 | 0.0105 | 0.0109 | 1.42E-03 |
| 0.011 | 0.012 | 0.0117 | 3.64   | 2.32   | 3.15   | 1.42E-03 |
| 0.011 | 0.012 | 0.0117 | 3.64   | 2.32   | 3.15   | 1.42E-03 |
| 0.011 | 0.012 | 0.0117 | 3.64   | 2.32   | 3.15   | 1.42E-03 |
| 5.57  | 4.22  | 3.65   | 0.0103 | 0.0105 | 0.0109 | 1.42E-03 |
| 5.57  | 4.22  | 3.65   | 0.0103 | 0.0105 | 0.0109 | 1.42E-03 |
| 5.57  | 4.22  | 3.65   | 0.0103 | 0.0105 | 0.0109 | 1.42E-03 |
| 2.2   | 2.39  | 3.28   | 0.0103 | 0.0105 | 0.0109 | 1.42E-03 |
| 3.75  | 3.93  | 2.55   | 0.0103 | 0.0105 | 0.0109 | 1.42E-03 |
| 4.34  | 3.73  | 4.01   | 2.62   | 2.28   | 2.3    | 1.44E-03 |
| 3.16  | 2.01  | 2.75   | 0.0103 | 0.0105 | 0.0109 | 1.45E-03 |
| 3.16  | 2.01  | 2.75   | 0.0103 | 0.0105 | 0.0109 | 1.45E-03 |
| 4.13  | 4.6   | 4.29   | 3.09   | 2.69   | 2.66   | 1.45E-03 |
| 2.26  | 2.39  | 3.34   | 0.0103 | 0.0105 | 0.0109 | 1.46E-03 |
| 2.26  | 2.39  | 3.34   | 0.0103 | 0.0105 | 0.0109 | 1.46E-03 |
| 3.78  | 2.49  | 3.78   | 0.0103 | 0.0105 | 0.0109 | 1.48E-03 |
| 0.011 | 0.012 | 0.0117 | 3.71   | 2.69   | 2.48   | 1.48E-03 |

|       |       |        |        |        |        |          |
|-------|-------|--------|--------|--------|--------|----------|
| 0.011 | 0.012 | 0.0117 | 2.32   | 3.1    | 3.66   | 1.49E-03 |
| 0.011 | 0.012 | 0.0117 | 2.32   | 3.1    | 3.66   | 1.49E-03 |
| 3.8   | 2.48  | 3.73   | 0.0103 | 0.0105 | 0.0109 | 1.49E-03 |
| 3.91  | 4.51  | 3.88   | 2.56   | 2.45   | 2.44   | 1.50E-03 |
| 4.72  | 3.01  | 4.34   | 0.0103 | 0.0105 | 0.0109 | 1.50E-03 |
| 0.011 | 0.012 | 0.0117 | 3.24   | 3.05   | 2.08   | 1.50E-03 |
| 4.48  | 4.37  | 2.91   | 0.0103 | 0.0105 | 0.0109 | 1.51E-03 |
| 3.15  | 2.05  | 2.38   | 0.0103 | 0.0105 | 0.0109 | 1.52E-03 |
| 2.17  | 2.87  | 3.43   | 0.0103 | 0.0105 | 0.0109 | 1.52E-03 |
| 3.17  | 3.97  | 2.53   | 0.0103 | 0.0105 | 0.0109 | 1.52E-03 |
| 3.17  | 3.97  | 2.53   | 0.0103 | 0.0105 | 0.0109 | 1.52E-03 |
| 3.72  | 2.69  | 2.48   | 0.0103 | 0.0105 | 0.0109 | 1.53E-03 |
| 3.88  | 2.48  | 3.06   | 0.0103 | 0.0105 | 0.0109 | 1.53E-03 |
| 2.57  | 2.19  | 3.38   | 0.0103 | 0.0105 | 0.0109 | 1.53E-03 |
| 2.48  | 3.35  | 2.2    | 0.0103 | 0.0105 | 0.0109 | 1.53E-03 |
| 2.48  | 3.35  | 2.2    | 0.0103 | 0.0105 | 0.0109 | 1.53E-03 |
| 0.011 | 0.012 | 0.0117 | 3.66   | 2.47   | 2.6    | 1.54E-03 |
| 3.71  | 2.42  | 3.67   | 0.0103 | 0.0105 | 0.0109 | 1.54E-03 |
| 0.011 | 0.012 | 0.0117 | 3.48   | 3.01   | 4.63   | 1.55E-03 |
| 3.5   | 2.43  | 3.83   | 0.0103 | 0.0105 | 0.0109 | 1.55E-03 |
| 2.81  | 4.17  | 4.38   | 0.0103 | 0.0105 | 0.0109 | 1.55E-03 |
| 0.011 | 0.012 | 0.0117 | 3.09   | 4.35   | 2.93   | 1.55E-03 |
| 0.011 | 0.012 | 0.0117 | 2.55   | 2.59   | 3.72   | 1.55E-03 |
| 2.65  | 2.5   | 3.72   | 0.0103 | 0.0105 | 0.0109 | 1.55E-03 |
| 2.65  | 2.5   | 3.72   | 0.0103 | 0.0105 | 0.0109 | 1.55E-03 |
| 0.011 | 0.012 | 0.0117 | 3.65   | 2.35   | 2.8    | 1.56E-03 |
| 4.46  | 3     | 3.16   | 0.0103 | 0.0105 | 0.0109 | 1.58E-03 |
| 3.78  | 4.53  | 2.85   | 0.0103 | 0.0105 | 0.0109 | 1.58E-03 |
| 3.44  | 2.41  | 3.82   | 0.0103 | 0.0105 | 0.0109 | 1.59E-03 |
| 0.011 | 0.012 | 0.0117 | 4.05   | 2.73   | 2.86   | 1.59E-03 |
| 0.011 | 0.012 | 0.0117 | 4.05   | 2.73   | 2.86   | 1.59E-03 |
| 0.011 | 0.012 | 0.0117 | 2.12   | 2.39   | 3.24   | 1.59E-03 |
| 2.3   | 3.63  | 3.35   | 0.0103 | 0.0105 | 0.0109 | 1.60E-03 |
| 2.3   | 3.63  | 3.35   | 0.0103 | 0.0105 | 0.0109 | 1.60E-03 |
| 2.6   | 2.23  | 3.45   | 0.0103 | 0.0105 | 0.0109 | 1.60E-03 |
| 2.6   | 2.23  | 3.45   | 0.0103 | 0.0105 | 0.0109 | 1.60E-03 |
| 2.33  | 2.46  | 3.47   | 0.0103 | 0.0105 | 0.0109 | 1.60E-03 |
| 2.33  | 2.46  | 3.47   | 0.0103 | 0.0105 | 0.0109 | 1.60E-03 |
| 2.33  | 2.46  | 3.47   | 0.0103 | 0.0105 | 0.0109 | 1.60E-03 |
| 4     | 3.41  | 2.51   | 0.0103 | 0.0105 | 0.0109 | 1.60E-03 |
| 4     | 3.41  | 2.51   | 0.0103 | 0.0105 | 0.0109 | 1.60E-03 |
| 3.95  | 2.55  | 2.98   | 0.0103 | 0.0105 | 0.0109 | 1.60E-03 |
| 3.95  | 2.55  | 2.98   | 0.0103 | 0.0105 | 0.0109 | 1.60E-03 |
| 0.011 | 0.012 | 0.0117 | 3.06   | 3.11   | 4.48   | 1.60E-03 |
| 0.011 | 0.012 | 0.0117 | 3.06   | 3.11   | 4.48   | 1.60E-03 |
| 3.29  | 2.56  | 4.06   | 0.0103 | 0.0105 | 0.0109 | 1.61E-03 |
| 3.78  | 2.4   | 2.97   | 0.0103 | 0.0105 | 0.0109 | 1.62E-03 |
| 2.38  | 3.62  | 3.68   | 0.0103 | 0.0105 | 0.0109 | 1.62E-03 |
| 3.27  | 2.25  | 2.25   | 0.0103 | 0.0105 | 0.0109 | 1.62E-03 |
| 3.27  | 2.25  | 2.25   | 0.0103 | 0.0105 | 0.0109 | 1.62E-03 |
| 0.011 | 0.012 | 0.0117 | 3.27   | 2.56   | 4.06   | 1.62E-03 |
| 0.011 | 0.012 | 0.0117 | 2.41   | 3.35   | 2.22   | 1.62E-03 |
| 3.56  | 2.79  | 2.26   | 0.0103 | 0.0105 | 0.0109 | 1.63E-03 |
| 4.51  | 5.19  | 5.13   | 2.81   | 3.09   | 2.45   | 1.64E-03 |
| 3.16  | 2.2   | 3.5    | 0.0103 | 0.0105 | 0.0109 | 1.64E-03 |
| 3.16  | 2.2   | 3.5    | 0.0103 | 0.0105 | 0.0109 | 1.64E-03 |
| 3.1   | 2.24  | 3.58   | 0.0103 | 0.0105 | 0.0109 | 1.64E-03 |
| 3.1   | 2.24  | 3.58   | 0.0103 | 0.0105 | 0.0109 | 1.64E-03 |

|       |       |        |        |        |        |          |
|-------|-------|--------|--------|--------|--------|----------|
| 4.25  | 2.73  | 3.21   | 0.0103 | 0.0105 | 0.0109 | 1.65E-03 |
| 3.05  | 2.08  | 2.11   | 0.0103 | 0.0105 | 0.0109 | 1.65E-03 |
| 2.16  | 2.94  | 3.46   | 0.0103 | 0.0105 | 0.0109 | 1.67E-03 |
| 2.16  | 2.94  | 3.46   | 0.0103 | 0.0105 | 0.0109 | 1.67E-03 |
| 3.61  | 2.38  | 2.59   | 0.0103 | 0.0105 | 0.0109 | 1.69E-03 |
| 4.02  | 2.53  | 3.72   | 0.0103 | 0.0105 | 0.0109 | 1.69E-03 |
| 0.011 | 0.012 | 0.0117 | 3.17   | 4.08   | 5.06   | 1.69E-03 |
| 3.57  | 2.36  | 2.55   | 0.0103 | 0.0105 | 0.0109 | 1.69E-03 |
| 3.57  | 2.36  | 2.55   | 0.0103 | 0.0105 | 0.0109 | 1.69E-03 |
| 3.24  | 2.02  | 2.83   | 0.0103 | 0.0105 | 0.0109 | 1.70E-03 |
| 3.45  | 2.32  | 2.41   | 0.0103 | 0.0105 | 0.0109 | 1.70E-03 |
| 3.45  | 2.32  | 2.41   | 0.0103 | 0.0105 | 0.0109 | 1.70E-03 |
| 0.011 | 0.012 | 0.0117 | 2.52   | 2.44   | 3.62   | 1.71E-03 |
| 0.011 | 0.012 | 0.0117 | 2.52   | 2.44   | 3.62   | 1.71E-03 |
| 0.011 | 0.012 | 0.0117 | 2.21   | 3.55   | 3.06   | 1.71E-03 |
| 0.011 | 0.012 | 0.0117 | 3.34   | 2.51   | 2.14   | 1.71E-03 |
| 0.011 | 0.012 | 0.0117 | 3.81   | 3.23   | 2.37   | 1.72E-03 |
| 0.011 | 0.012 | 0.0117 | 2.33   | 3.57   | 3.63   | 1.72E-03 |
| 0.011 | 0.012 | 0.0117 | 2.3    | 2.67   | 3.58   | 1.72E-03 |
| 3.61  | 2.76  | 2.29   | 0.0103 | 0.0105 | 0.0109 | 1.74E-03 |
| 3.61  | 2.76  | 2.29   | 0.0103 | 0.0105 | 0.0109 | 1.74E-03 |
| 4.4   | 2.77  | 3.43   | 0.0103 | 0.0105 | 0.0109 | 1.74E-03 |
| 4.4   | 2.77  | 3.43   | 0.0103 | 0.0105 | 0.0109 | 1.74E-03 |
| 0.011 | 0.012 | 0.0117 | 2.55   | 3.74   | 2.56   | 1.74E-03 |
| 0.011 | 0.012 | 0.0117 | 3.34   | 2.51   | 4.04   | 1.75E-03 |
| 0.011 | 0.012 | 0.0117 | 2.01   | 3.15   | 2.37   | 1.76E-03 |
| 3.03  | 4.88  | 4.02   | 0.0103 | 0.0105 | 0.0109 | 1.76E-03 |
| 3.03  | 4.88  | 4.02   | 0.0103 | 0.0105 | 0.0109 | 1.76E-03 |
| 4.76  | 3.85  | 2.96   | 0.0103 | 0.0105 | 0.0109 | 1.78E-03 |
| 3.13  | 4.65  | 3.21   | 0.0103 | 0.0105 | 0.0109 | 1.78E-03 |
| 3.83  | 3.53  | 3.75   | 2.54   | 2.34   | 2.78   | 1.79E-03 |
| 3.83  | 3.53  | 3.75   | 2.54   | 2.34   | 2.78   | 1.79E-03 |
| 3.9   | 4.92  | 3.07   | 0.0103 | 0.0105 | 0.0109 | 1.79E-03 |
| 3.9   | 4.92  | 3.07   | 0.0103 | 0.0105 | 0.0109 | 1.79E-03 |
| 3.9   | 4.92  | 3.07   | 0.0103 | 0.0105 | 0.0109 | 1.79E-03 |
| 0.011 | 0.012 | 0.0117 | 2.14   | 3.33   | 3.32   | 1.79E-03 |
| 3.86  | 2.49  | 2.82   | 0.0103 | 0.0105 | 0.0109 | 1.80E-03 |
| 3.86  | 2.49  | 2.82   | 0.0103 | 0.0105 | 0.0109 | 1.80E-03 |
| 0.011 | 0.012 | 0.0117 | 2.29   | 3.31   | 2.22   | 1.81E-03 |
| 3.88  | 2.9   | 2.47   | 0.0103 | 0.0105 | 0.0109 | 1.81E-03 |
| 3.1   | 2.18  | 2.05   | 0.0103 | 0.0105 | 0.0109 | 1.81E-03 |
| 4.04  | 4.1   | 4.04   | 3.48   | 3.23   | 3.13   | 1.82E-03 |
| 4.04  | 4.1   | 4.04   | 3.48   | 3.23   | 3.13   | 1.82E-03 |
| 4.37  | 2.72  | 3.47   | 0.0103 | 0.0105 | 0.0109 | 1.82E-03 |
| 3.24  | 2.18  | 2.23   | 0.0103 | 0.0105 | 0.0109 | 1.82E-03 |
| 3.24  | 2.18  | 2.23   | 0.0103 | 0.0105 | 0.0109 | 1.82E-03 |
| 0.011 | 0.012 | 0.0117 | 3.57   | 2.27   | 2.67   | 1.83E-03 |
| 2.33  | 2.32  | 3.42   | 0.0103 | 0.0105 | 0.0109 | 1.83E-03 |
| 2.33  | 2.32  | 3.42   | 0.0103 | 0.0105 | 0.0109 | 1.83E-03 |
| 2.33  | 2.23  | 3.35   | 0.0103 | 0.0105 | 0.0109 | 1.84E-03 |
| 0.011 | 0.012 | 0.0117 | 2.7    | 4.29   | 3.26   | 1.86E-03 |
| 0.011 | 0.012 | 0.0117 | 2.41   | 3.6    | 2.48   | 1.86E-03 |
| 5.4   | 5.32  | 5.28   | 1.93   | 0.0105 | 0.0109 | 1.86E-03 |
| 0.011 | 0.012 | 0.0117 | 3.02   | 4.35   | 2.89   | 1.87E-03 |
| 3.65  | 2.26  | 2.91   | 0.0103 | 0.0105 | 0.0109 | 1.88E-03 |
| 4.08  | 3.95  | 2.57   | 0.0103 | 0.0105 | 0.0109 | 1.88E-03 |
| 4.08  | 3.95  | 2.57   | 0.0103 | 0.0105 | 0.0109 | 1.88E-03 |
| 4.08  | 3.95  | 2.57   | 0.0103 | 0.0105 | 0.0109 | 1.88E-03 |



|       |       |        |        |        |        |          |
|-------|-------|--------|--------|--------|--------|----------|
| 3.32  | 2.54  | 2.08   | 0.0103 | 0.0105 | 0.0109 | 1.89E-03 |
| 3.32  | 2.04  | 2.76   | 0.0103 | 0.0105 | 0.0109 | 1.89E-03 |
| 3.4   | 2.29  | 3.7    | 0.0103 | 0.0105 | 0.0109 | 1.90E-03 |
| 2.86  | 2.44  | 3.85   | 0.0103 | 0.0105 | 0.0109 | 1.90E-03 |
| 2.86  | 2.44  | 3.85   | 0.0103 | 0.0105 | 0.0109 | 1.90E-03 |
| 2.78  | 2.52  | 3.89   | 0.0103 | 0.0105 | 0.0109 | 1.90E-03 |
| 2.78  | 2.52  | 3.89   | 0.0103 | 0.0105 | 0.0109 | 1.90E-03 |
| 2.78  | 2.52  | 3.89   | 0.0103 | 0.0105 | 0.0109 | 1.90E-03 |
| 0.011 | 0.012 | 0.0117 | 2.8    | 3.75   | 2.37   | 1.91E-03 |
| 0.011 | 0.012 | 0.0117 | 2.17   | 3.07   | 3.54   | 1.92E-03 |
| 0.011 | 0.012 | 0.0117 | 2.17   | 3.07   | 3.54   | 1.92E-03 |
| 3.75  | 4.14  | 2.55   | 0.0103 | 0.0105 | 0.0109 | 1.92E-03 |
| 3.75  | 4.14  | 2.55   | 0.0103 | 0.0105 | 0.0109 | 1.92E-03 |
| 3.65  | 2.49  | 2.45   | 0.0103 | 0.0105 | 0.0109 | 1.92E-03 |
| 2.44  | 3.68  | 2.54   | 0.0103 | 0.0105 | 0.0109 | 1.94E-03 |
| 2.44  | 3.68  | 2.54   | 0.0103 | 0.0105 | 0.0109 | 1.94E-03 |
| 2.28  | 3.35  | 3.71   | 0.0103 | 0.0105 | 0.0109 | 1.95E-03 |
| 2.28  | 3.35  | 3.71   | 0.0103 | 0.0105 | 0.0109 | 1.95E-03 |
| 2.68  | 4.36  | 3.95   | 0.0103 | 0.0105 | 0.0109 | 1.95E-03 |
| 2.68  | 4.36  | 3.95   | 0.0103 | 0.0105 | 0.0109 | 1.95E-03 |
| 3.14  | 2.57  | 4.12   | 0.0103 | 0.0105 | 0.0109 | 1.96E-03 |
| 4.17  | 2.75  | 2.89   | 0.0103 | 0.0105 | 0.0109 | 1.96E-03 |
| 4.17  | 2.75  | 2.89   | 0.0103 | 0.0105 | 0.0109 | 1.96E-03 |
| 4.64  | 4.66  | 4.05   | 2.26   | 2.33   | 2.85   | 1.96E-03 |
| 3.35  | 2.08  | 3.17   | 0.0103 | 0.0105 | 0.0109 | 1.97E-03 |
| 0.011 | 0.012 | 0.0117 | 2.26   | 3.67   | 2.89   | 1.99E-03 |
| 0.011 | 0.012 | 0.0117 | 2.28   | 2.58   | 3.57   | 1.99E-03 |
| 2.21  | 2.37  | 2.56   | 3.29   | 3.19   | 3.11   | 1.99E-03 |
| 2.21  | 2.37  | 2.56   | 3.29   | 3.19   | 3.11   | 1.99E-03 |
| 3.26  | 3.08  | 2.02   | 0.0103 | 0.0105 | 0.0109 | 2.00E-03 |
| 0.011 | 0.012 | 0.0117 | 2.68   | 2.29   | 3.63   | 2.00E-03 |
| 3.72  | 3.78  | 3.67   | 2.19   | 2.34   | 2.78   | 2.02E-03 |
| 3.72  | 3.78  | 3.67   | 2.19   | 2.34   | 2.78   | 2.02E-03 |
| 0.011 | 0.012 | 0.0117 | 3.59   | 2.36   | 2.48   | 2.03E-03 |
| 4.13  | 3.57  | 2.51   | 0.0103 | 0.0105 | 0.0109 | 2.03E-03 |
| 3.51  | 2.43  | 2.3    | 0.0103 | 0.0105 | 0.0109 | 2.04E-03 |
| 0.011 | 0.012 | 0.0117 | 4.05   | 2.5    | 3.12   | 2.05E-03 |
| 3.47  | 2.5   | 2.21   | 0.0103 | 0.0105 | 0.0109 | 2.05E-03 |
| 3.64  | 2.38  | 3.86   | 0.0103 | 0.0105 | 0.0109 | 2.06E-03 |
| 3.64  | 2.38  | 3.86   | 0.0103 | 0.0105 | 0.0109 | 2.06E-03 |
| 2.65  | 3.95  | 4.34   | 0.0103 | 0.0105 | 0.0109 | 2.06E-03 |
| 2.65  | 3.95  | 4.34   | 0.0103 | 0.0105 | 0.0109 | 2.06E-03 |
| 4.63  | 2.91  | 4.59   | 0.0103 | 0.0105 | 0.0109 | 2.06E-03 |
| 0.011 | 0.012 | 0.0117 | 2.46   | 3.64   | 2.43   | 2.07E-03 |
| 0.011 | 0.012 | 0.0117 | 4.34   | 3.5    | 2.64   | 2.08E-03 |
| 4.49  | 4.13  | 4.85   | 2.53   | 2.98   | 2.55   | 2.09E-03 |
| 4.49  | 4.13  | 4.85   | 2.53   | 2.98   | 2.55   | 2.09E-03 |
| 4.76  | 4.46  | 4.56   | 3.22   | 3.34   | 2.71   | 2.10E-03 |
| 4.76  | 4.46  | 4.56   | 3.22   | 3.34   | 2.71   | 2.10E-03 |
| 3.2   | 5.29  | 4.37   | 0.0103 | 0.0105 | 0.0109 | 2.11E-03 |
| 3.2   | 5.29  | 4.37   | 0.0103 | 0.0105 | 0.0109 | 2.11E-03 |
| 0.011 | 0.012 | 0.0117 | 2.28   | 3.74   | 2.96   | 2.11E-03 |
| 3.7   | 2.69  | 4.45   | 0.0103 | 0.0105 | 0.0109 | 2.12E-03 |
| 3.33  | 3.41  | 5.03   | 0.0103 | 0.0105 | 0.0109 | 2.12E-03 |
| 3.33  | 3.41  | 5.03   | 0.0103 | 0.0105 | 0.0109 | 2.12E-03 |
| 0.011 | 0.012 | 0.0117 | 4.44   | 2.88   | 3.08   | 2.13E-03 |
| 0.011 | 0.012 | 0.0117 | 4.44   | 2.88   | 3.08   | 2.13E-03 |
| 0.011 | 0.012 | 0.0117 | 2.09   | 3.15   | 2.13   | 2.14E-03 |

|       |       |        |        |        |        |          |
|-------|-------|--------|--------|--------|--------|----------|
| 4.05  | 4.3   | 4.61   | 2.64   | 2.89   | 2.26   | 2.14E-03 |
| 3.4   | 4.32  | 2.63   | 0.0103 | 0.0105 | 0.0109 | 2.14E-03 |
| 0.011 | 0.012 | 0.0117 | 2.25   | 3.35   | 3.71   | 2.15E-03 |
| 0.011 | 0.012 | 0.0117 | 2.21   | 2.35   | 3.4    | 2.15E-03 |
| 2.75  | 2.35  | 3.76   | 0.0103 | 0.0105 | 0.0109 | 2.18E-03 |
| 2.75  | 2.35  | 3.76   | 0.0103 | 0.0105 | 0.0109 | 2.18E-03 |
| 0.011 | 0.012 | 0.0117 | 2.06   | 3.12   | 3.39   | 2.18E-03 |
| 3.42  | 2.57  | 2.11   | 0.0103 | 0.0105 | 0.0109 | 2.18E-03 |
| 3.42  | 2.57  | 2.11   | 0.0103 | 0.0105 | 0.0109 | 2.18E-03 |
| 2.27  | 3.46  | 3.73   | 0.0103 | 0.0105 | 0.0109 | 2.18E-03 |
| 2.27  | 3.46  | 3.73   | 0.0103 | 0.0105 | 0.0109 | 2.18E-03 |
| 0.011 | 0.012 | 0.0117 | 3.57   | 2.37   | 2.4    | 2.18E-03 |
| 0.011 | 0.012 | 0.0117 | 3.57   | 2.37   | 2.4    | 2.18E-03 |
| 3.43  | 3.33  | 2.12   | 0.0103 | 0.0105 | 0.0109 | 2.19E-03 |
| 2.65  | 3.75  | 4.41   | 0.0103 | 0.0105 | 0.0109 | 2.19E-03 |
| 3.7   | 4.17  | 4.36   | 2.19   | 2.32   | 2.66   | 2.20E-03 |
| 3.7   | 4.17  | 4.36   | 2.19   | 2.32   | 2.66   | 2.20E-03 |
| 3.21  | 2.01  | 2.33   | 0.0103 | 0.0105 | 0.0109 | 2.21E-03 |
| 3.21  | 2.01  | 2.33   | 0.0103 | 0.0105 | 0.0109 | 2.21E-03 |
| 4.58  | 2.84  | 3.38   | 0.0103 | 0.0105 | 0.0109 | 2.21E-03 |
| 5.34  | 5.45  | 5.57   | 2.79   | 3.49   | 2.21   | 2.22E-03 |
| 5.34  | 5.45  | 5.57   | 2.79   | 3.49   | 2.21   | 2.22E-03 |
| 3.55  | 2.38  | 3.95   | 0.0103 | 0.0105 | 0.0109 | 2.23E-03 |
| 3.3   | 2.22  | 2.18   | 0.0103 | 0.0105 | 0.0109 | 2.23E-03 |
| 3.3   | 2.22  | 2.18   | 0.0103 | 0.0105 | 0.0109 | 2.23E-03 |
| 3.3   | 2.28  | 2.13   | 0.0103 | 0.0105 | 0.0109 | 2.24E-03 |
| 0.011 | 0.012 | 0.0117 | 2.47   | 4.11   | 3.64   | 2.24E-03 |
| 0.011 | 0.012 | 0.0117 | 2.14   | 3.57   | 3.06   | 2.24E-03 |
| 0.011 | 0.012 | 0.0117 | 2.64   | 3.48   | 2.13   | 2.24E-03 |
| 0.011 | 0.012 | 0.0117 | 2.64   | 3.48   | 2.13   | 2.24E-03 |
| 0.011 | 0.012 | 0.0117 | 3.39   | 2.3    | 3.83   | 2.25E-03 |
| 0.011 | 0.012 | 0.0117 | 3.39   | 2.3    | 3.83   | 2.25E-03 |
| 4.14  | 5.44  | 3.32   | 0.0103 | 0.0105 | 0.0109 | 2.25E-03 |
| 0.011 | 0.012 | 0.0117 | 2.36   | 3.09   | 3.91   | 2.26E-03 |
| 0.011 | 0.012 | 0.0117 | 2.09   | 2.92   | 3.49   | 2.26E-03 |
| 0.011 | 0.012 | 0.0117 | 2.09   | 2.92   | 3.49   | 2.26E-03 |
| 3.2   | 3.62  | 2.17   | 0.0103 | 0.0105 | 0.0109 | 2.27E-03 |
| 3.2   | 3.62  | 2.17   | 0.0103 | 0.0105 | 0.0109 | 2.27E-03 |
| 0.011 | 0.012 | 0.0117 | 3.62   | 2.17   | 2.95   | 2.28E-03 |
| 0.011 | 0.012 | 0.0117 | 3.62   | 2.17   | 2.95   | 2.28E-03 |
| 3.85  | 3.59  | 3.76   | 2.52   | 2.86   | 2.89   | 2.28E-03 |
| 3.85  | 3.59  | 3.76   | 2.52   | 2.86   | 2.89   | 2.28E-03 |
| 3.85  | 3.59  | 3.76   | 2.52   | 2.86   | 2.89   | 2.28E-03 |
| 4.11  | 2.53  | 4.02   | 0.0103 | 0.0105 | 0.0109 | 2.29E-03 |
| 4.11  | 2.53  | 4.02   | 0.0103 | 0.0105 | 0.0109 | 2.29E-03 |
| 4.8   | 5.04  | 4.64   | 3.68   | 3.5    | 3.9    | 2.30E-03 |
| 2.4   | 3.86  | 2.8    | 0.0103 | 0.0105 | 0.0109 | 2.30E-03 |
| 2.4   | 3.86  | 2.8    | 0.0103 | 0.0105 | 0.0109 | 2.30E-03 |
| 2.4   | 3.86  | 2.8    | 0.0103 | 0.0105 | 0.0109 | 2.30E-03 |
| 4.66  | 2.78  | 3.93   | 0.0103 | 0.0105 | 0.0109 | 2.30E-03 |
| 4.66  | 2.78  | 3.93   | 0.0103 | 0.0105 | 0.0109 | 2.30E-03 |
| 3.79  | 2.31  | 3.63   | 0.0103 | 0.0105 | 0.0109 | 2.32E-03 |
| 3.79  | 2.31  | 3.63   | 0.0103 | 0.0105 | 0.0109 | 2.32E-03 |
| 4.37  | 4.08  | 2.64   | 0.0103 | 0.0105 | 0.0109 | 2.32E-03 |
| 0.011 | 0.012 | 0.0117 | 2.11   | 3.33   | 2.33   | 2.35E-03 |
| 4.14  | 2.69  | 2.8    | 0.0103 | 0.0105 | 0.0109 | 2.36E-03 |
| 5.01  | 3.25  | 3.39   | 0.0103 | 0.0105 | 0.0109 | 2.37E-03 |
| 5.01  | 3.25  | 3.39   | 0.0103 | 0.0105 | 0.0109 | 2.37E-03 |

|       |       |        |        |        |        |          |
|-------|-------|--------|--------|--------|--------|----------|
| 5.01  | 3.25  | 3.39   | 0.0103 | 0.0105 | 0.0109 | 2.37E-03 |
| 2.29  | 2.1   | 3.3    | 0.0103 | 0.0105 | 0.0109 | 2.37E-03 |
| 2.29  | 2.1   | 3.3    | 0.0103 | 0.0105 | 0.0109 | 2.37E-03 |
| 2.58  | 3.41  | 2.07   | 0.0103 | 0.0105 | 0.0109 | 2.37E-03 |
| 3.83  | 2.5   | 2.57   | 0.0103 | 0.0105 | 0.0109 | 2.39E-03 |
| 3.83  | 2.5   | 2.57   | 0.0103 | 0.0105 | 0.0109 | 2.39E-03 |
| 3.89  | 3.12  | 2.32   | 0.0103 | 0.0105 | 0.0109 | 2.39E-03 |
| 3.89  | 3.12  | 2.32   | 0.0103 | 0.0105 | 0.0109 | 2.39E-03 |
| 0.011 | 0.012 | 0.0117 | 3.68   | 3.63   | 2.26   | 2.40E-03 |
| 0.011 | 0.012 | 0.0117 | 3.68   | 3.63   | 2.26   | 2.40E-03 |
| 0.011 | 0.012 | 0.0117 | 2.16   | 3.38   | 2.32   | 2.42E-03 |
| 3.79  | 2.25  | 3.08   | 0.0103 | 0.0105 | 0.0109 | 2.43E-03 |
| 3.94  | 2.49  | 2.74   | 0.0103 | 0.0105 | 0.0109 | 2.43E-03 |
| 3.94  | 2.49  | 2.74   | 0.0103 | 0.0105 | 0.0109 | 2.43E-03 |
| 3.77  | 4.34  | 2.57   | 0.0103 | 0.0105 | 0.0109 | 2.44E-03 |
| 3.77  | 4.34  | 2.57   | 0.0103 | 0.0105 | 0.0109 | 2.44E-03 |
| 0.011 | 0.012 | 0.0117 | 2.09   | 3.42   | 2.52   | 2.44E-03 |
| 0.011 | 0.012 | 0.0117 | 2.22   | 2.45   | 3.52   | 2.46E-03 |
| 0.011 | 0.012 | 0.0117 | 4.13   | 2.5    | 3.09   | 2.48E-03 |
| 0.011 | 0.012 | 0.0117 | 4.13   | 2.5    | 3.09   | 2.48E-03 |
| 4.08  | 3.96  | 3.61   | 2.15   | 2.71   | 2.23   | 2.49E-03 |
| 4.08  | 3.96  | 3.61   | 2.15   | 2.71   | 2.23   | 2.49E-03 |
| 3.63  | 3.32  | 2.16   | 0.0103 | 0.0105 | 0.0109 | 2.49E-03 |
| 4.11  | 2.92  | 2.55   | 0.0103 | 0.0105 | 0.0109 | 2.49E-03 |
| 4.11  | 2.92  | 2.55   | 0.0103 | 0.0105 | 0.0109 | 2.49E-03 |
| 0.011 | 0.012 | 0.0117 | 2.47   | 2.72   | 3.92   | 2.50E-03 |
| 0.011 | 0.012 | 0.0117 | 2.47   | 2.72   | 3.92   | 2.50E-03 |
| 3.23  | 2.5   | 1.93   | 0.0103 | 0.0105 | 0.0109 | 2.50E-03 |
| 0.011 | 0.012 | 0.0117 | 3.45   | 2.1    | 2.54   | 2.50E-03 |
| 0.011 | 0.012 | 0.0117 | 2.11   | 3.47   | 3.4    | 2.52E-03 |
| 0.011 | 0.012 | 0.0117 | 2.11   | 3.47   | 3.4    | 2.52E-03 |
| 0.011 | 0.012 | 0.0117 | 2.64   | 3.82   | 2.41   | 2.52E-03 |
| 0.011 | 0.012 | 0.0117 | 2.64   | 3.82   | 2.41   | 2.52E-03 |
| 0.011 | 0.012 | 0.0117 | 2.64   | 3.82   | 2.41   | 2.52E-03 |
| 0.011 | 0.012 | 0.0117 | 2.4    | 3.95   | 2.91   | 2.52E-03 |
| 0.011 | 0.012 | 0.0117 | 2.4    | 3.95   | 2.91   | 2.52E-03 |
| 4.81  | 3.21  | 3.11   | 0.0103 | 0.0105 | 0.0109 | 2.56E-03 |
| 3.51  | 3.25  | 3.33   | 2.29   | 2.66   | 2.34   | 2.57E-03 |
| 3.55  | 3.58  | 3.88   | 2.51   | 2.87   | 2.64   | 2.59E-03 |
| 3.55  | 3.58  | 3.88   | 2.51   | 2.87   | 2.64   | 2.59E-03 |
| 3.66  | 2.37  | 2.43   | 0.0103 | 0.0105 | 0.0109 | 2.61E-03 |
| 3.66  | 2.37  | 2.43   | 0.0103 | 0.0105 | 0.0109 | 2.61E-03 |
| 0.011 | 0.012 | 0.0117 | 3.1    | 4.93   | 3.39   | 2.61E-03 |
| 3.66  | 2.32  | 3.9    | 0.0103 | 0.0105 | 0.0109 | 2.61E-03 |
| 4.07  | 2.74  | 2.6    | 0.0103 | 0.0105 | 0.0109 | 2.62E-03 |
| 4.07  | 2.74  | 2.6    | 0.0103 | 0.0105 | 0.0109 | 2.62E-03 |
| 3.75  | 2.53  | 4.32   | 0.0103 | 0.0105 | 0.0109 | 2.62E-03 |
| 3.88  | 3     | 2.3    | 0.0103 | 0.0105 | 0.0109 | 2.62E-03 |
| 0.011 | 0.012 | 0.0117 | 2.38   | 3.83   | 2.67   | 2.65E-03 |
| 3.73  | 2.96  | 4.96   | 0.0103 | 0.0105 | 0.0109 | 2.66E-03 |
| 3.73  | 2.96  | 4.96   | 0.0103 | 0.0105 | 0.0109 | 2.66E-03 |
| 0.011 | 0.012 | 0.0117 | 3.65   | 2.78   | 2.17   | 2.66E-03 |
| 3.15  | 3.55  | 2.08   | 0.0103 | 0.0105 | 0.0109 | 2.66E-03 |
| 3.15  | 3.55  | 2.08   | 0.0103 | 0.0105 | 0.0109 | 2.66E-03 |
| 0.011 | 0.012 | 0.0117 | 3.51   | 3.28   | 2.08   | 2.67E-03 |
| 4.23  | 2.54  | 3.13   | 0.0103 | 0.0105 | 0.0109 | 2.67E-03 |
| 4.23  | 2.54  | 3.13   | 0.0103 | 0.0105 | 0.0109 | 2.67E-03 |
| 0.011 | 0.012 | 0.0117 | 2.5    | 3.48   | 2.12   | 2.68E-03 |

|       |       |        |        |        |        |          |
|-------|-------|--------|--------|--------|--------|----------|
| 3.73  | 2.19  | 3.38   | 0.0103 | 0.0105 | 0.0109 | 2.69E-03 |
| 0.011 | 0.012 | 0.0117 | 2.17   | 3      | 3.71   | 2.69E-03 |
| 3.68  | 2.35  | 2.46   | 0.0103 | 0.0105 | 0.0109 | 2.71E-03 |
| 3.57  | 4.16  | 4.25   | 2.56   | 2.25   | 2.52   | 2.71E-03 |
| 4.61  | 2.71  | 4.24   | 0.0103 | 0.0105 | 0.0109 | 2.72E-03 |
| 3.99  | 2.47  | 2.77   | 0.0103 | 0.0105 | 0.0109 | 2.74E-03 |
| 3.8   | 2.72  | 4.67   | 0.0103 | 0.0105 | 0.0109 | 2.74E-03 |
| 5.31  | 5.65  | 5.5    | 3.83   | 4.1    | 3.26   | 2.74E-03 |
| 0.011 | 0.012 | 0.0117 | 1.7    | 2.67   | 2.89   | 2.75E-03 |
| 3     | 4.26  | 2.61   | 0.0103 | 0.0105 | 0.0109 | 2.75E-03 |
| 0.011 | 0.012 | 0.0117 | 2.31   | 3.83   | 3.8    | 2.76E-03 |
| 4.78  | 4.6   | 4.6    | 2.39   | 2.41   | 3.28   | 2.78E-03 |
| 4.78  | 4.6   | 4.6    | 2.39   | 2.41   | 3.28   | 2.78E-03 |
| 3.23  | 3.85  | 2.23   | 0.0103 | 0.0105 | 0.0109 | 2.80E-03 |
| 3.59  | 2.71  | 2.12   | 0.0103 | 0.0105 | 0.0109 | 2.81E-03 |
| 3.95  | 3.77  | 3.77   | 2.54   | 2.6    | 3.04   | 2.82E-03 |
| 3.95  | 3.77  | 3.77   | 2.54   | 2.6    | 3.04   | 2.82E-03 |
| 0.011 | 0.012 | 0.0117 | 2.49   | 4.22   | 3.18   | 2.84E-03 |
| 0.011 | 0.012 | 0.0117 | 2.49   | 4.22   | 3.18   | 2.84E-03 |
| 0.011 | 0.012 | 0.0117 | 2.54   | 3.85   | 2.46   | 2.86E-03 |
| 2.53  | 4.34  | 4      | 0.0103 | 0.0105 | 0.0109 | 2.88E-03 |
| 0.011 | 0.012 | 0.0117 | 2.11   | 3.65   | 2.96   | 2.89E-03 |
| 3.88  | 3.94  | 2.35   | 0.0103 | 0.0105 | 0.0109 | 2.90E-03 |
| 0.011 | 0.012 | 0.0117 | 2.55   | 3.62   | 4.42   | 2.90E-03 |
| 3.46  | 2.62  | 2.03   | 0.0103 | 0.0105 | 0.0109 | 2.91E-03 |
| 3.46  | 2.62  | 2.03   | 0.0103 | 0.0105 | 0.0109 | 2.91E-03 |
| 3.92  | 3.85  | 2.33   | 0.0103 | 0.0105 | 0.0109 | 2.94E-03 |
| 4.21  | 2.42  | 3.62   | 0.0103 | 0.0105 | 0.0109 | 2.94E-03 |
| 3.58  | 3.89  | 3.51   | 2.72   | 2.22   | 2.33   | 2.96E-03 |
| 3.58  | 3.89  | 3.51   | 2.72   | 2.22   | 2.33   | 2.96E-03 |
| 3.75  | 3.6   | 3.95   | 2.27   | 2.56   | 2.82   | 2.96E-03 |
| 0.011 | 0.012 | 0.0117 | 2.28   | 3.62   | 2.4    | 3.00E-03 |
| 0.011 | 0.012 | 0.0117 | 2.28   | 3.62   | 2.4    | 3.00E-03 |
| 0.011 | 0.012 | 0.0117 | 2.09   | 3.65   | 3.08   | 3.02E-03 |
| 0.011 | 0.012 | 0.0117 | 2.09   | 3.65   | 3.08   | 3.02E-03 |
| 3.03  | 2.33  | 4      | 0.0103 | 0.0105 | 0.0109 | 3.02E-03 |
| 3.03  | 2.33  | 4      | 0.0103 | 0.0105 | 0.0109 | 3.02E-03 |
| 0.011 | 0.012 | 0.0117 | 2.69   | 4.48   | 3.17   | 3.02E-03 |
| 4.11  | 2.35  | 3.42   | 0.0103 | 0.0105 | 0.0109 | 3.04E-03 |
| 4.11  | 2.35  | 3.42   | 0.0103 | 0.0105 | 0.0109 | 3.04E-03 |
| 4.28  | 4.95  | 4.2    | 2.03   | 2.79   | 2.11   | 3.06E-03 |
| 4.28  | 4.95  | 4.2    | 2.03   | 2.79   | 2.11   | 3.06E-03 |
| 0.011 | 0.012 | 0.0117 | 3.63   | 2.2    | 3.75   | 3.08E-03 |
| 4.03  | 5.08  | 2.91   | 0.0103 | 0.0105 | 0.0109 | 3.10E-03 |
| 2.8   | 2.45  | 4.05   | 0.0103 | 0.0105 | 0.0109 | 3.13E-03 |
| 2.8   | 2.45  | 4.05   | 0.0103 | 0.0105 | 0.0109 | 3.13E-03 |
| 3.71  | 3.75  | 2.21   | 0.0103 | 0.0105 | 0.0109 | 3.17E-03 |
| 0.011 | 0.012 | 0.0117 | 2.05   | 3.47   | 3.45   | 3.18E-03 |
| 0.011 | 0.012 | 0.0117 | 2.34   | 4.11   | 3.64   | 3.18E-03 |
| 0.011 | 0.012 | 0.0117 | 2.06   | 3.63   | 3.1    | 3.19E-03 |
| 0.011 | 0.012 | 0.0117 | 2.06   | 3.63   | 3.1    | 3.19E-03 |
| 0.011 | 0.012 | 0.0117 | 3.1    | 2.94   | 4.71   | 3.21E-03 |
| 0.011 | 0.012 | 0.0117 | 3.44   | 2.42   | 2.05   | 3.21E-03 |
| 0.011 | 0.012 | 0.0117 | 3.44   | 2.42   | 2.05   | 3.21E-03 |
| 0.011 | 0.012 | 0.0117 | 4.41   | 3.24   | 2.57   | 3.22E-03 |
| 0.011 | 0.012 | 0.0117 | 4.41   | 3.24   | 2.57   | 3.22E-03 |
| 4.19  | 4.03  | 4.62   | 3.13   | 3.2    | 3.15   | 3.22E-03 |
| 4.19  | 4.03  | 4.62   | 3.13   | 3.2    | 3.15   | 3.22E-03 |

|       |       |        |        |        |        |          |
|-------|-------|--------|--------|--------|--------|----------|
| 4.19  | 4.03  | 4.62   | 3.13   | 3.2    | 3.15   | 3.22E-03 |
| 4.98  | 4.14  | 4.98   | 2.69   | 3      | 2.56   | 3.22E-03 |
| 4.98  | 4.14  | 4.98   | 2.69   | 3      | 2.56   | 3.22E-03 |
| 3.88  | 3     | 2.22   | 0.0103 | 0.0105 | 0.0109 | 3.24E-03 |
| 4.62  | 3.96  | 4.78   | 2.89   | 2.36   | 2.51   | 3.25E-03 |
| 3.63  | 2.38  | 4.21   | 0.0103 | 0.0105 | 0.0109 | 3.26E-03 |
| 4.87  | 2.75  | 4.21   | 0.0103 | 0.0105 | 0.0109 | 3.28E-03 |
| 0.011 | 0.012 | 0.0117 | 2.01   | 3.56   | 3      | 3.29E-03 |
| 3.88  | 2.32  | 2.69   | 0.0103 | 0.0105 | 0.0109 | 3.29E-03 |
| 5.4   | 5.32  | 5.28   | 1.93   | 3.41   | 2.34   | 3.31E-03 |
| 0.011 | 0.012 | 0.0117 | 3.66   | 2.09   | 2.8    | 3.33E-03 |
| 0.011 | 0.012 | 0.0117 | 3.66   | 2.09   | 2.8    | 3.33E-03 |
| 0.011 | 0.012 | 0.0117 | 2.23   | 3.61   | 2.38   | 3.36E-03 |
| 3.66  | 3.98  | 2.26   | 0.0103 | 0.0105 | 0.0109 | 3.38E-03 |
| 4.33  | 2.59  | 2.97   | 0.0103 | 0.0105 | 0.0109 | 3.40E-03 |
| 3.45  | 2.21  | 2.18   | 0.0103 | 0.0105 | 0.0109 | 3.40E-03 |
| 3.73  | 3.35  | 4.1    | 2.25   | 2.29   | 2.45   | 3.42E-03 |
| 3.73  | 3.35  | 4.1    | 2.25   | 2.29   | 2.45   | 3.42E-03 |
| 0.011 | 0.012 | 0.0117 | 2.15   | 3.78   | 2.88   | 3.43E-03 |
| 3.67  | 2.22  | 2.47   | 0.0103 | 0.0105 | 0.0109 | 3.44E-03 |
| 4.52  | 2.63  | 3.24   | 0.0103 | 0.0105 | 0.0109 | 3.44E-03 |
| 4.52  | 2.63  | 3.24   | 0.0103 | 0.0105 | 0.0109 | 3.44E-03 |
| 3.9   | 4.33  | 4.49   | 2.94   | 2.5    | 2.23   | 3.45E-03 |
| 3.9   | 4.33  | 4.49   | 2.94   | 2.5    | 2.23   | 3.45E-03 |
| 2.14  | 3.33  | 2.09   | 0.0103 | 0.0105 | 0.0109 | 3.46E-03 |
| 3.89  | 4.11  | 2.34   | 0.0103 | 0.0105 | 0.0109 | 3.51E-03 |
| 4.13  | 2.9   | 2.42   | 0.0103 | 0.0105 | 0.0109 | 3.51E-03 |
| 0.011 | 0.012 | 0.0117 | 2.2    | 3.87   | 3.65   | 3.52E-03 |
| 3.45  | 2.31  | 2.08   | 0.0103 | 0.0105 | 0.0109 | 3.56E-03 |
| 3.45  | 2.31  | 2.08   | 0.0103 | 0.0105 | 0.0109 | 3.56E-03 |
| 4.15  | 3.58  | 2.31   | 0.0103 | 0.0105 | 0.0109 | 3.58E-03 |
| 4.29  | 3.76  | 4.18   | 3.03   | 3.12   | 2.9    | 3.64E-03 |
| 4.29  | 3.76  | 4.18   | 3.03   | 3.12   | 2.9    | 3.64E-03 |
| 4.29  | 3.76  | 4.18   | 3.03   | 3.12   | 2.9    | 3.64E-03 |
| 4.29  | 3.76  | 4.18   | 3.03   | 3.12   | 2.9    | 3.64E-03 |
| 0.011 | 0.012 | 0.0117 | 3.8    | 2.51   | 2.3    | 3.66E-03 |
| 0.011 | 0.012 | 0.0117 | 2.7    | 4.51   | 3.02   | 3.67E-03 |
| 2.17  | 3.16  | 3.91   | 0.0103 | 0.0105 | 0.0109 | 3.67E-03 |
| 4.61  | 3.1   | 2.75   | 0.0103 | 0.0105 | 0.0109 | 3.67E-03 |
| 3.13  | 2.73  | 4.61   | 0.0103 | 0.0105 | 0.0109 | 3.69E-03 |
| 3.13  | 2.73  | 4.61   | 0.0103 | 0.0105 | 0.0109 | 3.69E-03 |
| 4.62  | 2.82  | 3.01   | 0.0103 | 0.0105 | 0.0109 | 3.69E-03 |
| 3.88  | 2.4   | 2.49   | 0.0103 | 0.0105 | 0.0109 | 3.70E-03 |
| 0.011 | 0.012 | 0.0117 | 4.37   | 3.25   | 2.47   | 3.70E-03 |
| 3.59  | 2.04  | 2.63   | 0.0103 | 0.0105 | 0.0109 | 3.72E-03 |
| 0.011 | 0.012 | 0.0117 | 2.55   | 4.62   | 3.79   | 3.75E-03 |
| 0.011 | 0.012 | 0.0117 | 2.55   | 4.62   | 3.79   | 3.75E-03 |
| 3.97  | 2.88  | 2.26   | 0.0103 | 0.0105 | 0.0109 | 3.76E-03 |
| 3.97  | 2.88  | 2.26   | 0.0103 | 0.0105 | 0.0109 | 3.76E-03 |
| 0.011 | 0.012 | 0.0117 | 2.04   | 3.67   | 2.85   | 3.79E-03 |
| 0.011 | 0.012 | 0.0117 | 2.04   | 3.67   | 2.85   | 3.79E-03 |
| 3.82  | 2.23  | 3.94   | 0.0103 | 0.0105 | 0.0109 | 3.83E-03 |
| 4.15  | 4.19  | 3.56   | 2.46   | 2.67   | 2.76   | 3.85E-03 |
| 2.48  | 4.31  | 3.02   | 0.0103 | 0.0105 | 0.0109 | 3.87E-03 |
| 2.48  | 4.31  | 3.02   | 0.0103 | 0.0105 | 0.0109 | 3.87E-03 |
| 0.011 | 0.012 | 0.0117 | 2.16   | 2.8    | 3.83   | 3.88E-03 |
| 4.71  | 5.09  | 5.3    | 0.0103 | 2.11   | 0.0109 | 3.89E-03 |
| 4.71  | 5.09  | 5.3    | 0.0103 | 2.11   | 0.0109 | 3.89E-03 |

|       |       |        |        |        |        |          |
|-------|-------|--------|--------|--------|--------|----------|
| 4.13  | 2.9   | 2.37   | 0.0103 | 0.0105 | 0.0109 | 3.91E-03 |
| 3.35  | 3.02  | 3.58   | 2.18   | 2.09   | 2.38   | 3.91E-03 |
| 3.69  | 2.11  | 3.69   | 0.0103 | 0.0105 | 0.0109 | 3.92E-03 |
| 3.65  | 2.04  | 2.72   | 0.0103 | 0.0105 | 0.0109 | 3.92E-03 |
| 3.65  | 2.04  | 2.72   | 0.0103 | 0.0105 | 0.0109 | 3.92E-03 |
| 0.011 | 0.012 | 0.0117 | 2.16   | 3.95   | 3.28   | 3.95E-03 |
| 4.11  | 2.89  | 2.35   | 0.0103 | 0.0105 | 0.0109 | 3.96E-03 |
| 2.69  | 2.46  | 3      | 4.46   | 3.82   | 4.27   | 3.97E-03 |
| 4.88  | 4.65  | 4.34   | 3.66   | 3.67   | 3.44   | 3.99E-03 |
| 4.88  | 4.65  | 4.34   | 3.66   | 3.67   | 3.44   | 3.99E-03 |
| 5.79  | 6.15  | 5.79   | 3      | 3.99   | 4.11   | 4.01E-03 |
| 5.79  | 6.15  | 5.79   | 3      | 3.99   | 4.11   | 4.01E-03 |
| 5.79  | 6.15  | 5.79   | 3      | 3.99   | 4.11   | 4.01E-03 |
| 5.79  | 6.15  | 5.79   | 3      | 3.99   | 4.11   | 4.01E-03 |
| 5.79  | 6.15  | 5.79   | 3      | 3.99   | 4.11   | 4.01E-03 |
| 5.79  | 6.15  | 5.79   | 3      | 3.99   | 4.11   | 4.01E-03 |
| 3.77  | 2.5   | 2.23   | 0.0103 | 0.0105 | 0.0109 | 4.01E-03 |
| 5.54  | 5.82  | 5.56   | 2.79   | 4.06   | 3.29   | 4.02E-03 |
| 5.54  | 5.82  | 5.56   | 2.79   | 4.06   | 3.29   | 4.02E-03 |
| 0.011 | 0.012 | 0.0117 | 3.18   | 3.89   | 2.12   | 4.04E-03 |
| 4.38  | 2.41  | 4.08   | 0.0103 | 0.0105 | 0.0109 | 4.14E-03 |
| 4.38  | 2.41  | 4.08   | 0.0103 | 0.0105 | 0.0109 | 4.14E-03 |
| 0.011 | 0.012 | 0.0117 | 4.16   | 2.38   | 2.85   | 4.24E-03 |
| 0.011 | 0.012 | 0.0117 | 4.16   | 2.38   | 2.85   | 4.24E-03 |
| 0.011 | 0.012 | 0.0117 | 3.83   | 3      | 2.08   | 4.25E-03 |
| 2.17  | 2.29  | 3.6    | 0.0103 | 0.0105 | 0.0109 | 4.28E-03 |
| 4.47  | 4.61  | 4.95   | 0.0103 | 2.02   | 0.0109 | 4.30E-03 |
| 4.74  | 5.28  | 5.02   | 2.62   | 3.6    | 3.18   | 4.38E-03 |
| 4.74  | 5.28  | 5.02   | 2.62   | 3.6    | 3.18   | 4.38E-03 |
| 4.51  | 2.68  | 2.89   | 0.0103 | 0.0105 | 0.0109 | 4.41E-03 |
| 0.011 | 0.012 | 0.0117 | 3.11   | 3.79   | 2.03   | 4.43E-03 |
| 0.011 | 0.012 | 0.0117 | 3.11   | 3.79   | 2.03   | 4.43E-03 |
| 4.03  | 3.51  | 4.06   | 2.81   | 2.86   | 2.84   | 4.54E-03 |
| 0.011 | 0.012 | 0.0117 | 2.39   | 4.36   | 4.22   | 4.55E-03 |
| 4.16  | 4.38  | 4.06   | 3.6    | 3.52   | 3.32   | 4.63E-03 |
| 4.77  | 4.23  | 4.82   | 2.03   | 3.09   | 2.54   | 4.65E-03 |
| 0.011 | 0.012 | 0.0117 | 2.09   | 3.67   | 3.85   | 4.66E-03 |
| 4.27  | 4.18  | 2.34   | 0.0103 | 0.0105 | 0.0109 | 4.67E-03 |
| 4.27  | 4.18  | 2.34   | 0.0103 | 0.0105 | 0.0109 | 4.67E-03 |
| 2.4   | 4.52  | 4.01   | 0.0103 | 0.0105 | 0.0109 | 4.72E-03 |
| 2.25  | 4.18  | 3.12   | 0.0103 | 0.0105 | 0.0109 | 4.73E-03 |
| 2.25  | 4.18  | 3.12   | 0.0103 | 0.0105 | 0.0109 | 4.73E-03 |
| 0.011 | 0.012 | 0.0117 | 2.3    | 4.16   | 4.19   | 4.80E-03 |
| 0.011 | 0.012 | 0.0117 | 2.22   | 3.92   | 2.61   | 4.83E-03 |
| 3.83  | 2.57  | 4.87   | 0.0103 | 0.0105 | 0.0109 | 4.89E-03 |
| 2.99  | 3.62  | 3.54   | 2.26   | 2.28   | 2.27   | 4.93E-03 |
| 0.011 | 0.012 | 0.0117 | 2.88   | 4.93   | 3.12   | 4.95E-03 |
| 0.011 | 0.012 | 0.0117 | 2.48   | 2.81   | 4.33   | 4.96E-03 |
| 5.52  | 5.41  | 5.32   | 0.0103 | 2.46   | 0.0109 | 4.97E-03 |
| 4.93  | 4.23  | 4.47   | 3.21   | 2.97   | 2.49   | 4.97E-03 |
| 4.96  | 5.05  | 4.52   | 2.68   | 2.38   | 3.45   | 4.99E-03 |
| 4.96  | 5.05  | 4.52   | 2.68   | 2.38   | 3.45   | 4.99E-03 |
| 0.011 | 0.012 | 0.0117 | 4.77   | 4.17   | 2.5    | 5.00E-03 |
| 0.011 | 0.012 | 0.0117 | 2.39   | 3.92   | 4.58   | 5.06E-03 |
| 0.011 | 0.012 | 0.0117 | 2.39   | 3.92   | 4.58   | 5.06E-03 |
| 3.09  | 2.78  | 2.96   | 3.6    | 4.03   | 3.77   | 5.11E-03 |
| 4.1   | 3.85  | 3.91   | 3      | 2.19   | 2.57   | 5.12E-03 |
| 0.011 | 0.012 | 0.0117 | 3.86   | 2.4    | 2.27   | 5.14E-03 |

|       |       |        |        |        |        |          |
|-------|-------|--------|--------|--------|--------|----------|
| 4.07  | 4.53  | 4.68   | 2.87   | 3.36   | 2.79   | 5.15E-03 |
| 5.31  | 5.65  | 5.5    | 2.88   | 4.1    | 3.26   | 5.16E-03 |
| 4.29  | 3.97  | 3.53   | 2.32   | 2.64   | 2.69   | 5.18E-03 |
| 4.29  | 3.97  | 3.53   | 2.32   | 2.64   | 2.69   | 5.18E-03 |
| 3.04  | 2.7   | 4.73   | 0.0103 | 0.0105 | 0.0109 | 5.18E-03 |
| 0.011 | 0.012 | 0.0117 | 2.8    | 4.7    | 2.87   | 5.19E-03 |
| 0.011 | 0.012 | 0.0117 | 2.66   | 4.44   | 2.69   | 5.24E-03 |
| 0.011 | 0.012 | 0.0117 | 2.66   | 4.44   | 2.69   | 5.24E-03 |
| 3.72  | 3.6   | 4.19   | 2.66   | 2.61   | 2.12   | 5.29E-03 |
| 0.011 | 0.012 | 0.0117 | 4.23   | 2.79   | 2.36   | 5.30E-03 |
| 0.011 | 0.012 | 0.0117 | 4.23   | 2.79   | 2.36   | 5.30E-03 |
| 5.41  | 5.33  | 4.7    | 0.0103 | 0.0105 | 2.3    | 5.34E-03 |
| 0.011 | 0.012 | 0.0117 | 2.21   | 2.88   | 4.11   | 5.36E-03 |
| 0.011 | 0.012 | 0.0117 | 2.21   | 2.88   | 4.11   | 5.36E-03 |
| 0.011 | 0.012 | 0.0117 | 5.12   | 3.89   | 2.66   | 5.46E-03 |
| 0.011 | 0.012 | 0.0117 | 3.97   | 2.04   | 3.23   | 5.48E-03 |
| 5.45  | 4.4   | 5.37   | 3.19   | 3.13   | 2.61   | 5.49E-03 |
| 5.45  | 4.4   | 5.37   | 3.19   | 3.13   | 2.61   | 5.49E-03 |
| 5.45  | 4.4   | 5.37   | 3.19   | 3.13   | 2.61   | 5.49E-03 |
| 4.51  | 5.23  | 5.43   | 3.52   | 3.16   | 2.8    | 5.52E-03 |
| 4.51  | 5.23  | 5.43   | 3.52   | 3.16   | 2.8    | 5.52E-03 |
| 4.48  | 3.14  | 2.39   | 0.0103 | 0.0105 | 0.0109 | 5.54E-03 |
| 2.29  | 4.41  | 3.32   | 0.0103 | 0.0105 | 0.0109 | 5.54E-03 |
| 0.011 | 0.012 | 0.0117 | 2.17   | 4.24   | 3.53   | 5.55E-03 |
| 0.011 | 0.012 | 0.0117 | 2.17   | 4.24   | 3.53   | 5.55E-03 |
| 5.11  | 2.87  | 3.27   | 0.0103 | 0.0105 | 0.0109 | 5.61E-03 |
| 3.72  | 2.07  | 2.41   | 0.0103 | 0.0105 | 0.0109 | 5.64E-03 |
| 2.73  | 5.37  | 4.42   | 0.0103 | 0.0105 | 0.0109 | 5.72E-03 |
| 2.05  | 2.58  | 3.81   | 0.0103 | 0.0105 | 0.0109 | 5.78E-03 |
| 3.8   | 2.16  | 2.36   | 0.0103 | 0.0105 | 0.0109 | 5.89E-03 |
| 3.59  | 3.18  | 3.7    | 2.61   | 2.68   | 2.49   | 5.89E-03 |
| 4.54  | 4.01  | 4.51   | 0.0103 | 0.0105 | 2.01   | 5.92E-03 |
| 3.33  | 3.07  | 3.36   | 2.57   | 2.62   | 2.78   | 5.93E-03 |
| 3.33  | 3.07  | 3.36   | 2.57   | 2.62   | 2.78   | 5.93E-03 |
| 4.26  | 4.68  | 4.68   | 3.84   | 3.6    | 3.6    | 5.95E-03 |
| 4.26  | 4.68  | 4.68   | 3.84   | 3.6    | 3.6    | 5.95E-03 |
| 4.26  | 4.68  | 4.68   | 3.84   | 3.6    | 3.6    | 5.95E-03 |
| 3.25  | 3.7   | 3.37   | 2.35   | 2.72   | 2.38   | 5.95E-03 |
| 3.98  | 4.36  | 4.4    | 2.26   | 3.08   | 2.9    | 6.05E-03 |
| 2.36  | 4.64  | 3.51   | 0.0103 | 0.0105 | 0.0109 | 6.06E-03 |
| 2.36  | 4.64  | 3.51   | 0.0103 | 0.0105 | 0.0109 | 6.06E-03 |
| 4.44  | 4.53  | 5.24   | 2.15   | 0.0105 | 0.0109 | 6.07E-03 |
| 4.37  | 4.35  | 4.33   | 3.59   | 2.89   | 3.33   | 6.18E-03 |
| 4.37  | 4.35  | 4.33   | 3.59   | 2.89   | 3.33   | 6.18E-03 |
| 3.84  | 3.91  | 4.73   | 2.51   | 2.74   | 2.58   | 6.18E-03 |
| 3.84  | 3.91  | 4.73   | 2.51   | 2.74   | 2.58   | 6.18E-03 |
| 3.34  | 3.24  | 2.98   | 2.43   | 2.65   | 2.5    | 6.24E-03 |
| 3.34  | 3.24  | 2.98   | 2.43   | 2.65   | 2.5    | 6.24E-03 |
| 4.81  | 4.04  | 4.95   | 0.0103 | 2.07   | 0.0109 | 6.27E-03 |
| 3.72  | 3.6   | 4.19   | 2.66   | 2.61   | 2.05   | 6.28E-03 |
| 3.72  | 3.6   | 4.19   | 2.66   | 2.61   | 2.05   | 6.28E-03 |
| 4.44  | 3.77  | 3.93   | 2.46   | 2.89   | 2.89   | 6.30E-03 |
| 4.44  | 3.77  | 3.93   | 2.46   | 2.89   | 2.89   | 6.30E-03 |
| 4.13  | 2.42  | 2.43   | 0.0103 | 0.0105 | 0.0109 | 6.30E-03 |
| 0.011 | 0.012 | 0.0117 | 2.67   | 2.83   | 4.68   | 6.33E-03 |
| 0.011 | 0.012 | 0.0117 | 2.67   | 2.83   | 4.68   | 6.33E-03 |
| 4.39  | 4.25  | 4.27   | 0.0103 | 2.07   | 0.0109 | 6.33E-03 |
| 4.39  | 4.25  | 4.27   | 0.0103 | 2.07   | 0.0109 | 6.33E-03 |

|       |       |        |        |        |        |          |
|-------|-------|--------|--------|--------|--------|----------|
| 5.01  | 2.61  | 3.46   | 0.0103 | 0.0105 | 0.0109 | 6.33E-03 |
| 2.93  | 3.23  | 2.83   | 4.04   | 4.1    | 3.67   | 6.46E-03 |
| 4.52  | 3.76  | 3.74   | 2.53   | 2.74   | 2.64   | 6.55E-03 |
| 4.52  | 3.76  | 3.74   | 2.53   | 2.74   | 2.64   | 6.55E-03 |
| 3.83  | 2.49  | 2.05   | 0.0103 | 0.0105 | 0.0109 | 6.55E-03 |
| 3.83  | 2.49  | 2.05   | 0.0103 | 0.0105 | 0.0109 | 6.55E-03 |
| 3.83  | 2.49  | 2.05   | 0.0103 | 0.0105 | 0.0109 | 6.55E-03 |
| 0.011 | 0.012 | 0.0117 | 2.67   | 4.24   | 2.32   | 6.55E-03 |
| 3.29  | 2.66  | 3.26   | 4.21   | 4.07   | 4.2    | 6.57E-03 |
| 3.29  | 2.66  | 3.26   | 4.21   | 4.07   | 4.2    | 6.57E-03 |
| 4.27  | 4.08  | 4.32   | 2.85   | 3.45   | 2.73   | 6.62E-03 |
| 0.011 | 0.012 | 0.0117 | 2.61   | 2.15   | 4.03   | 6.71E-03 |
| 0.011 | 0.012 | 0.0117 | 2.61   | 2.15   | 4.03   | 6.71E-03 |
| 2.09  | 2.98  | 4.14   | 0.0103 | 0.0105 | 0.0109 | 6.72E-03 |
| 4.14  | 4.89  | 5.44   | 0.0103 | 0.0105 | 2.12   | 6.74E-03 |
| 3.89  | 2.02  | 2.63   | 0.0103 | 0.0105 | 0.0109 | 6.74E-03 |
| 4.24  | 4.25  | 4.2    | 2.31   | 3.02   | 3.19   | 6.75E-03 |
| 4.24  | 4.25  | 4.2    | 2.31   | 3.02   | 3.19   | 6.75E-03 |
| 4.8   | 3.95  | 4.3    | 2.03   | 2.58   | 2.92   | 6.78E-03 |
| 4.31  | 3.88  | 3.92   | 1.95   | 0.0105 | 0.0109 | 6.91E-03 |
| 3.57  | 3.51  | 4.3    | 2.51   | 2.53   | 2.37   | 6.92E-03 |
| 3.57  | 3.51  | 4.3    | 2.51   | 2.53   | 2.37   | 6.92E-03 |
| 2.76  | 2.7   | 2.67   | 3.23   | 3.64   | 3.28   | 6.94E-03 |
| 2.76  | 2.7   | 2.67   | 3.23   | 3.64   | 3.28   | 6.94E-03 |
| 4.79  | 5.05  | 4.75   | 4.2    | 4.41   | 4.26   | 7.09E-03 |
| 4.79  | 5.05  | 4.75   | 4.2    | 4.41   | 4.26   | 7.09E-03 |
| 4.5   | 4.56  | 4.9    | 0.0103 | 0.0105 | 2.28   | 7.14E-03 |
| 4.5   | 4.56  | 4.9    | 0.0103 | 0.0105 | 2.28   | 7.14E-03 |
| 3.71  | 3.58  | 3.39   | 2.74   | 2.75   | 3.06   | 7.17E-03 |
| 3.59  | 4.03  | 3.35   | 2.65   | 2.21   | 2.52   | 7.35E-03 |
| 4.53  | 2.45  | 2.78   | 0.0103 | 0.0105 | 0.0109 | 7.36E-03 |
| 3.12  | 3.24  | 2.85   | 2.39   | 2.51   | 2.49   | 7.45E-03 |
| 3.71  | 3.87  | 4.2    | 2.72   | 3.19   | 2.85   | 7.46E-03 |
| 3.71  | 3.87  | 4.2    | 2.72   | 3.19   | 2.85   | 7.46E-03 |
| 0.011 | 0.012 | 0.0117 | 2.85   | 2.45   | 4.59   | 7.49E-03 |
| 0.011 | 0.012 | 0.0117 | 4.3    | 2.66   | 2.3    | 7.51E-03 |
| 4.95  | 4.39  | 5.03   | 0.0103 | 2.34   | 0.0109 | 7.54E-03 |
| 3.89  | 3.79  | 4.29   | 2.94   | 3.01   | 2.42   | 7.57E-03 |
| 3.87  | 3.34  | 3.44   | 0.0103 | 0.0105 | 1.73   | 7.60E-03 |
| 4.2   | 3.67  | 3.9    | 2.98   | 3.13   | 2.7    | 7.66E-03 |
| 4.2   | 3.67  | 3.9    | 2.98   | 3.13   | 2.7    | 7.66E-03 |
| 4.2   | 3.67  | 3.9    | 2.98   | 3.13   | 2.7    | 7.66E-03 |
| 4.78  | 4.94  | 4.72   | 4.01   | 3.27   | 3.77   | 7.68E-03 |
| 4.78  | 4.94  | 4.72   | 4.01   | 3.27   | 3.77   | 7.68E-03 |
| 4.78  | 4.94  | 4.72   | 4.01   | 3.27   | 3.77   | 7.68E-03 |
| 5.31  | 5.85  | 4.59   | 2.91   | 2.99   | 3.58   | 7.73E-03 |
| 4.29  | 3.97  | 3.53   | 2.32   | 2.82   | 2.69   | 7.73E-03 |
| 4.64  | 4.09  | 4.27   | 3.53   | 3.34   | 3.1    | 7.78E-03 |
| 4.64  | 4.09  | 4.27   | 3.53   | 3.34   | 3.1    | 7.78E-03 |
| 4.64  | 4.09  | 4.27   | 3.53   | 3.34   | 3.1    | 7.78E-03 |
| 5.41  | 4.21  | 4.61   | 2.98   | 2.94   | 2.41   | 7.79E-03 |
| 0.011 | 0.012 | 0.0117 | 2.89   | 2.65   | 4.86   | 7.84E-03 |
| 0.011 | 0.012 | 0.0117 | 2.89   | 2.65   | 4.86   | 7.84E-03 |
| 3.82  | 3.18  | 3.4    | 2.31   | 2.62   | 2.36   | 7.96E-03 |
| 3.82  | 3.18  | 3.4    | 2.31   | 2.62   | 2.36   | 7.96E-03 |
| 4.75  | 3.85  | 4.2    | 2.05   | 0.0105 | 0.0109 | 7.99E-03 |
| 5.19  | 4.57  | 5.1    | 3.86   | 3.87   | 3.36   | 8.04E-03 |
| 4.25  | 5.07  | 4.41   | 0.0103 | 2.23   | 0.0109 | 8.06E-03 |



|       |       |        |        |        |        |          |
|-------|-------|--------|--------|--------|--------|----------|
| 4.6   | 4.45  | 2.23   | 0.0103 | 0.0105 | 0.0109 | 8.08E-03 |
| 5.67  | 4.73  | 5.55   | 3.91   | 3.78   | 3.89   | 8.12E-03 |
| 5.67  | 4.73  | 5.55   | 3.91   | 3.78   | 3.89   | 8.12E-03 |
| 5.67  | 4.73  | 5.55   | 3.91   | 3.78   | 3.89   | 8.12E-03 |
| 3     | 3.35  | 3.24   | 2.53   | 2.05   | 2.41   | 8.13E-03 |
| 3.25  | 3.73  | 3.8    | 2.06   | 2.63   | 2.51   | 8.20E-03 |
| 4.06  | 3.16  | 3.61   | 5.79   | 4.95   | 5.29   | 8.26E-03 |
| 4.06  | 3.16  | 3.61   | 5.79   | 4.95   | 5.29   | 8.26E-03 |
| 4.06  | 3.16  | 3.61   | 5.79   | 4.95   | 5.29   | 8.26E-03 |
| 4.06  | 3.16  | 3.61   | 5.79   | 4.95   | 5.29   | 8.26E-03 |
| 5.12  | 4.81  | 5.13   | 0.0103 | 2.56   | 0.0109 | 8.29E-03 |
| 5.12  | 4.81  | 5.13   | 0.0103 | 2.56   | 0.0109 | 8.29E-03 |
| 3.38  | 3.42  | 3.45   | 2.85   | 2.25   | 2.6    | 8.33E-03 |
| 3.38  | 3.42  | 3.45   | 2.85   | 2.25   | 2.6    | 8.33E-03 |
| 3.34  | 3.89  | 3.53   | 2.33   | 2.52   | 2.81   | 8.37E-03 |
| 3.34  | 3.89  | 3.53   | 2.33   | 2.52   | 2.81   | 8.37E-03 |
| 0.011 | 0.012 | 0.0117 | 4.11   | 2.64   | 2.08   | 8.38E-03 |
| 4.55  | 4.17  | 4.09   | 2.31   | 3.25   | 2.81   | 8.46E-03 |
| 4.55  | 4.17  | 4.09   | 2.31   | 3.25   | 2.81   | 8.46E-03 |
| 4.98  | 4.98  | 5.08   | 2.5    | 3.82   | 3.18   | 8.48E-03 |
| 4.98  | 4.98  | 5.08   | 2.5    | 3.82   | 3.18   | 8.48E-03 |
| 0.011 | 0.012 | 0.0117 | 2.35   | 4.54   | 2.8    | 8.52E-03 |
| 0.011 | 0.012 | 0.0117 | 2.35   | 4.54   | 2.8    | 8.52E-03 |
| 4.92  | 5     | 4.17   | 0.0103 | 2.32   | 0.0109 | 8.58E-03 |
| 4.92  | 5     | 4.17   | 0.0103 | 2.32   | 0.0109 | 8.58E-03 |
| 5.6   | 4.42  | 5.6    | 3.09   | 3.08   | 2.12   | 8.59E-03 |
| 5.55  | 5.55  | 5.73   | 2.93   | 4.09   | 2.33   | 8.68E-03 |
| 4.55  | 3.68  | 4.26   | 2.81   | 2.87   | 2.29   | 8.77E-03 |
| 0.011 | 0.012 | 0.0117 | 2.36   | 2.58   | 4.41   | 8.78E-03 |
| 5.19  | 4.6   | 4.4    | 3.34   | 3.41   | 2.68   | 8.79E-03 |
| 5.19  | 4.6   | 4.4    | 3.34   | 3.41   | 2.68   | 8.79E-03 |
| 3.9   | 4.54  | 4.45   | 0.0103 | 0.0105 | 2.17   | 8.82E-03 |
| 3.9   | 4.54  | 4.45   | 0.0103 | 0.0105 | 2.17   | 8.82E-03 |
| 4.18  | 3.84  | 4.02   | 2.17   | 3.04   | 2.83   | 8.88E-03 |
| 4.18  | 3.84  | 4.02   | 2.17   | 3.04   | 2.83   | 8.88E-03 |
| 4.2   | 4.52  | 4.17   | 5.03   | 4.83   | 4.86   | 8.90E-03 |
| 4.2   | 4.52  | 4.17   | 5.03   | 4.83   | 4.86   | 8.90E-03 |
| 4.73  | 4.26  | 4.01   | 2.19   | 0.0105 | 0.0109 | 8.95E-03 |
| 4.73  | 4.26  | 4.01   | 2.19   | 0.0105 | 0.0109 | 8.95E-03 |
| 4.54  | 3.87  | 4.34   | 3.1    | 2.72   | 3.27   | 8.95E-03 |
| 4.75  | 3.76  | 4.75   | 2.45   | 2.93   | 2.78   | 9.08E-03 |
| 3.87  | 5.18  | 5      | 0.0103 | 2.19   | 0.0109 | 9.10E-03 |
| 3.87  | 5.18  | 5      | 0.0103 | 2.19   | 0.0109 | 9.10E-03 |
| 3.87  | 5.18  | 5      | 0.0103 | 2.19   | 0.0109 | 9.10E-03 |
| 4.2   | 4.56  | 4.42   | 0.0103 | 2.29   | 0.0109 | 9.15E-03 |
| 4.2   | 4.56  | 4.42   | 0.0103 | 2.29   | 0.0109 | 9.15E-03 |
| 0.011 | 0.012 | 0.0117 | 4.77   | 4.17   | 2.18   | 9.17E-03 |
| 4.25  | 4.04  | 3.69   | 2.04   | 2.13   | 2.98   | 9.17E-03 |
| 4.77  | 4.04  | 4.92   | 0.0103 | 2.29   | 0.0109 | 9.19E-03 |
| 4.77  | 4.04  | 4.92   | 0.0103 | 2.29   | 0.0109 | 9.19E-03 |
| 5.08  | 5.79  | 4.67   | 2.43   | 3.03   | 3.56   | 9.29E-03 |
| 5.08  | 5.79  | 4.67   | 2.43   | 3.03   | 3.56   | 9.29E-03 |
| 0.011 | 0.012 | 0.0117 | 4.91   | 2.72   | 2.71   | 9.34E-03 |
| 4.05  | 4.3   | 4.61   | 2.24   | 0.0105 | 0.0109 | 9.38E-03 |
| 4.05  | 4.3   | 4.61   | 2.24   | 0.0105 | 0.0109 | 9.38E-03 |
| 3.89  | 3.34  | 4.26   | 2.58   | 2.61   | 2.31   | 9.40E-03 |
| 0.011 | 0.012 | 0.0117 | 4.58   | 3.31   | 2.12   | 9.44E-03 |
| 0.011 | 0.012 | 0.0117 | 4.58   | 3.31   | 2.12   | 9.44E-03 |

|       |       |        |        |        |        |          |
|-------|-------|--------|--------|--------|--------|----------|
| 3.39  | 2.97  | 3.5    | 2.31   | 2.6    | 2.33   | 9.45E-03 |
| 3.39  | 2.97  | 3.5    | 2.31   | 2.6    | 2.33   | 9.45E-03 |
| 5.56  | 4.55  | 4.93   | 2.98   | 3.65   | 2.71   | 9.45E-03 |
| 5.56  | 4.55  | 4.93   | 2.98   | 3.65   | 2.71   | 9.45E-03 |
| 5.48  | 4.71  | 4.73   | 2.54   | 0.0105 | 0.0109 | 9.45E-03 |
| 5.09  | 5.05  | 4.44   | 3.61   | 3.85   | 3.23   | 9.46E-03 |
| 5.09  | 5.05  | 4.44   | 3.61   | 3.85   | 3.23   | 9.46E-03 |
| 5.09  | 5.05  | 4.44   | 3.61   | 3.85   | 3.23   | 9.46E-03 |
| 5.09  | 5.05  | 4.44   | 3.61   | 3.85   | 3.23   | 9.46E-03 |
| 5.09  | 5.05  | 4.44   | 3.61   | 3.85   | 3.23   | 9.46E-03 |
| 2.53  | 2.76  | 2.84   | 2.26   | 2.2    | 2.02   | 9.47E-03 |
| 2.53  | 2.76  | 2.84   | 2.26   | 2.2    | 2.02   | 9.47E-03 |
| 3.67  | 3.63  | 3.83   | 2.36   | 2.98   | 2.13   | 9.50E-03 |
| 3.67  | 3.63  | 3.83   | 2.36   | 2.98   | 2.13   | 9.50E-03 |
| 3.81  | 3.08  | 3.56   | 2.36   | 2.54   | 2.46   | 9.50E-03 |
| 3.81  | 3.08  | 3.56   | 2.36   | 2.54   | 2.46   | 9.50E-03 |
| 5.39  | 4.54  | 4.89   | 3.5    | 3.87   | 3.69   | 9.57E-03 |
| 5.39  | 4.54  | 4.89   | 3.5    | 3.87   | 3.69   | 9.57E-03 |
| 5.39  | 4.54  | 4.89   | 3.5    | 3.87   | 3.69   | 9.57E-03 |
| 4.9   | 4.88  | 4.57   | 3.52   | 3.43   | 2.47   | 9.58E-03 |
| 4.9   | 4.88  | 4.57   | 3.52   | 3.43   | 2.47   | 9.58E-03 |
| 5.48  | 5.58  | 4.09   | 2.35   | 0.0105 | 0.0109 | 9.66E-03 |
| 5.48  | 5.58  | 4.09   | 2.35   | 0.0105 | 0.0109 | 9.66E-03 |
| 4.14  | 4.03  | 4.16   | 3.73   | 3.64   | 3.87   | 9.68E-03 |
| 3.2   | 2.91  | 3.13   | 2.44   | 2.61   | 2.66   | 9.71E-03 |
| 3.2   | 2.91  | 3.13   | 2.44   | 2.61   | 2.66   | 9.71E-03 |
| 4.53  | 4.26  | 3.86   | 2.37   | 3.2    | 2.37   | 9.72E-03 |
| 4.49  | 4.5   | 4.79   | 3.34   | 3.36   | 2.38   | 9.77E-03 |
| 4.49  | 4.5   | 4.79   | 3.34   | 3.36   | 2.38   | 9.77E-03 |
| 5.05  | 4.45  | 4.22   | 2.35   | 0.0105 | 0.0109 | 9.85E-03 |
| 0.011 | 0.012 | 0.0117 | 2.24   | 4.59   | 2.9    | 9.89E-03 |
| 4.57  | 4.19  | 4.23   | 3.34   | 3.76   | 3.35   | 9.93E-03 |
| 4.57  | 4.19  | 4.23   | 3.34   | 3.76   | 3.35   | 9.93E-03 |
| 4.57  | 4.19  | 4.23   | 3.34   | 3.76   | 3.35   | 9.93E-03 |
| 4.57  | 4.19  | 4.23   | 3.34   | 3.76   | 3.35   | 9.93E-03 |
| 4.57  | 4.19  | 4.23   | 3.34   | 3.76   | 3.35   | 9.93E-03 |
| 0.011 | 0.012 | 0.0117 | 2.33   | 2.08   | 4.01   | 9.94E-03 |
| 2.86  | 3.03  | 2.9    | 2.45   | 2.64   | 2.36   | 1.01E-02 |
| 2.95  | 3.31  | 3.32   | 2.45   | 2.67   | 2.36   | 1.01E-02 |
| 3.66  | 4.03  | 4.42   | 2.61   | 3.03   | 2.31   | 1.02E-02 |
| 3.66  | 4.03  | 4.42   | 2.61   | 3.03   | 2.31   | 1.02E-02 |
| 3.16  | 3.14  | 3.64   | 2.63   | 2.49   | 2.41   | 1.02E-02 |
| 3.78  | 3.96  | 3.9    | 2.09   | 0.0105 | 0.0109 | 1.03E-02 |
| 3.99  | 3.96  | 4.17   | 3.39   | 2.79   | 2.62   | 1.03E-02 |
| 3.99  | 3.96  | 4.17   | 3.39   | 2.79   | 2.62   | 1.03E-02 |
| 3.99  | 3.96  | 4.17   | 3.39   | 2.79   | 2.62   | 1.03E-02 |
| 3.99  | 3.96  | 4.17   | 3.39   | 2.79   | 2.62   | 1.03E-02 |
| 4.18  | 5.17  | 4.39   | 0.0103 | 2.34   | 0.0109 | 1.04E-02 |
| 4.18  | 5.17  | 4.39   | 0.0103 | 2.34   | 0.0109 | 1.04E-02 |
| 4.18  | 5.17  | 4.39   | 0.0103 | 2.34   | 0.0109 | 1.04E-02 |
| 3.76  | 3.83  | 3.63   | 2.75   | 2.87   | 2.06   | 1.04E-02 |
| 3.76  | 3.83  | 3.63   | 2.75   | 2.87   | 2.06   | 1.04E-02 |
| 5.06  | 4.82  | 4.74   | 0.0103 | 2.63   | 0.0109 | 1.05E-02 |
| 5.06  | 4.82  | 4.74   | 0.0103 | 2.63   | 0.0109 | 1.05E-02 |
| 0.011 | 0.012 | 0.0117 | 4.59   | 2.62   | 2.37   | 1.06E-02 |
| 4.9   | 4.84  | 4.12   | 3.36   | 2.97   | 3.5    | 1.06E-02 |
| 4.9   | 4.84  | 4.12   | 3.36   | 2.97   | 3.5    | 1.06E-02 |
| 2.66  | 4.54  | 2.29   | 0.0103 | 0.0105 | 0.0109 | 1.06E-02 |

|       |       |        |        |        |        |          |
|-------|-------|--------|--------|--------|--------|----------|
| 4.98  | 4.25  | 4.62   | 2.72   | 3.6    | 2.94   | 1.06E-02 |
| 4.98  | 4.25  | 4.62   | 2.72   | 3.6    | 2.94   | 1.06E-02 |
| 4.72  | 4.84  | 4.22   | 3.06   | 3.71   | 3      | 1.07E-02 |
| 4.72  | 4.84  | 4.22   | 3.06   | 3.71   | 3      | 1.07E-02 |
| 4.33  | 5.02  | 4.94   | 3.48   | 3.72   | 3.83   | 1.08E-02 |
| 4.33  | 5.02  | 4.94   | 3.48   | 3.72   | 3.83   | 1.08E-02 |
| 3.97  | 4.44  | 4.23   | 3.21   | 2.07   | 2.27   | 1.08E-02 |
| 3.97  | 4.44  | 4.23   | 3.21   | 2.07   | 2.27   | 1.08E-02 |
| 2.63  | 2.55  | 2.83   | 4.11   | 4.17   | 3.37   | 1.09E-02 |
| 3.93  | 3.48  | 4.13   | 2.8    | 2.57   | 3.03   | 1.10E-02 |
| 0.011 | 0.012 | 0.0117 | 2.08   | 4.8    | 3.88   | 1.10E-02 |
| 5.38  | 4.32  | 5.35   | 2.83   | 3.6    | 2.95   | 1.11E-02 |
| 5.38  | 4.32  | 5.35   | 2.83   | 3.6    | 2.95   | 1.11E-02 |
| 5.15  | 4.55  | 4.19   | 3.21   | 3.47   | 2.95   | 1.11E-02 |
| 4.96  | 4.4   | 3.81   | 0.0103 | 2.24   | 0.0109 | 1.11E-02 |
| 4.96  | 4.4   | 3.81   | 0.0103 | 2.24   | 0.0109 | 1.11E-02 |
| 4.7   | 4.73  | 5.1    | 2.62   | 3.82   | 2.78   | 1.12E-02 |
| 4.7   | 4.73  | 5.1    | 2.62   | 3.82   | 2.78   | 1.12E-02 |
| 3.72  | 3.12  | 3.31   | 2.67   | 2.51   | 2.47   | 1.13E-02 |
| 3.72  | 3.12  | 3.31   | 2.67   | 2.51   | 2.47   | 1.13E-02 |
| 5.14  | 3.96  | 5.01   | 2.46   | 3.03   | 3.03   | 1.13E-02 |
| 5.14  | 3.96  | 5.01   | 2.46   | 3.03   | 3.03   | 1.13E-02 |
| 5.14  | 3.96  | 5.01   | 2.46   | 3.03   | 3.03   | 1.13E-02 |
| 4.27  | 4.24  | 4.2    | 3.38   | 3.5    | 2.76   | 1.13E-02 |
| 4.27  | 4.24  | 4.2    | 3.38   | 3.5    | 2.76   | 1.13E-02 |
| 4.97  | 5.14  | 4.72   | 2.7    | 3.93   | 2.96   | 1.14E-02 |
| 4.97  | 5.14  | 4.72   | 2.7    | 3.93   | 2.96   | 1.14E-02 |
| 4.76  | 4.98  | 4.69   | 2.65   | 0.0105 | 0.0109 | 1.14E-02 |
| 4.76  | 4.98  | 4.69   | 2.65   | 0.0105 | 0.0109 | 1.14E-02 |
| 3.93  | 3.91  | 3.63   | 0.0103 | 2.1    | 0.0109 | 1.14E-02 |
| 4.13  | 3.84  | 3.34   | 2.23   | 2.79   | 2.07   | 1.14E-02 |
| 4.13  | 3.84  | 3.34   | 2.23   | 2.79   | 2.07   | 1.14E-02 |
| 4.33  | 3.99  | 3.19   | 2.13   | 2.49   | 2.12   | 1.14E-02 |
| 4.33  | 3.99  | 3.19   | 2.13   | 2.49   | 2.12   | 1.14E-02 |
| 5.01  | 4.9   | 3.66   | 2.6    | 2.43   | 2.7    | 1.15E-02 |
| 5.01  | 4.9   | 3.66   | 2.6    | 2.43   | 2.7    | 1.15E-02 |
| 3.43  | 3.54  | 3.02   | 2.68   | 2.56   | 2.6    | 1.15E-02 |
| 3.43  | 3.54  | 3.02   | 2.68   | 2.56   | 2.6    | 1.15E-02 |
| 3.74  | 3.5   | 3.21   | 2.57   | 2.87   | 2.53   | 1.15E-02 |
| 4.29  | 4.4   | 4.31   | 0.0103 | 2.41   | 0.0109 | 1.17E-02 |
| 0.011 | 0.012 | 0.0117 | 2.26   | 4.49   | 2.54   | 1.17E-02 |
| 4.06  | 4.5   | 3.73   | 0.0103 | 2.2    | 0.0109 | 1.17E-02 |
| 4.67  | 4.58  | 5.15   | 3.71   | 2.71   | 2.48   | 1.17E-02 |
| 4.67  | 4.58  | 5.15   | 3.71   | 2.71   | 2.48   | 1.17E-02 |
| 4.26  | 4.62  | 4.54   | 0.0103 | 2.48   | 0.0109 | 1.18E-02 |
| 4.26  | 4.62  | 4.54   | 0.0103 | 2.48   | 0.0109 | 1.18E-02 |
| 3.94  | 4.21  | 3.67   | 0.0103 | 2.16   | 0.0109 | 1.19E-02 |
| 4.24  | 3.52  | 4.77   | 2.6    | 2.61   | 2.56   | 1.19E-02 |
| 4.52  | 3.93  | 3.94   | 2.25   | 0.0105 | 0.0109 | 1.20E-02 |
| 3.19  | 3.58  | 3.25   | 2.79   | 2.37   | 2.3    | 1.20E-02 |
| 3.76  | 3.46  | 4.47   | 2.73   | 2.35   | 2.37   | 1.20E-02 |
| 0.011 | 0.012 | 0.0117 | 1.86   | 4.41   | 3.57   | 1.21E-02 |
| 5.02  | 4.3   | 3.96   | 2.13   | 3.12   | 2.45   | 1.21E-02 |
| 3.75  | 4.18  | 5.06   | 2.2    | 0.0105 | 0.0109 | 1.22E-02 |
| 3.75  | 4.18  | 5.06   | 2.2    | 0.0105 | 0.0109 | 1.22E-02 |
| 3.5   | 4.26  | 3.61   | 2.65   | 2.62   | 2.86   | 1.23E-02 |
| 4.72  | 3.62  | 4.09   | 0.0103 | 2.17   | 0.0109 | 1.23E-02 |
| 4.72  | 3.62  | 4.09   | 0.0103 | 2.17   | 0.0109 | 1.23E-02 |

|       |       |        |        |        |        |          |
|-------|-------|--------|--------|--------|--------|----------|
| 4.275 | 3.88  | 2.98   | 1.82   | 0.0105 | 0.0109 | 1.23E-02 |
| 3.7   | 3.43  | 4      | 0.0103 | 0.0105 | 2.05   | 1.25E-02 |
| 5.17  | 4.7   | 4.88   | 3.09   | 4.06   | 3.57   | 1.25E-02 |
| 5.17  | 4.7   | 4.88   | 3.09   | 4.06   | 3.57   | 1.25E-02 |
| 5.17  | 4.7   | 4.88   | 3.09   | 4.06   | 3.57   | 1.25E-02 |
| 5.17  | 4.7   | 4.88   | 3.09   | 4.06   | 3.57   | 1.25E-02 |
| 5.17  | 4.7   | 4.88   | 3.09   | 4.06   | 3.57   | 1.25E-02 |
| 3.89  | 3.25  | 3.99   | 2.51   | 2.8    | 2.31   | 1.26E-02 |
| 3.89  | 3.25  | 3.99   | 2.51   | 2.8    | 2.31   | 1.26E-02 |
| 5.11  | 4.29  | 4.64   | 2.59   | 3.59   | 2.6    | 1.27E-02 |
| 3.58  | 3.03  | 3.13   | 2.52   | 2.51   | 2.25   | 1.27E-02 |
| 4.04  | 3.68  | 3.73   | 2.8    | 3.19   | 3.21   | 1.27E-02 |
| 4.04  | 3.68  | 3.73   | 2.8    | 3.19   | 3.21   | 1.27E-02 |
| 4.04  | 3.68  | 3.73   | 2.8    | 3.19   | 3.21   | 1.27E-02 |
| 4.04  | 3.68  | 3.73   | 2.8    | 3.19   | 3.21   | 1.27E-02 |
| 3.99  | 4.31  | 5.11   | 3.18   | 2.86   | 2.87   | 1.27E-02 |
| 3.99  | 4.31  | 5.11   | 3.18   | 2.86   | 2.87   | 1.27E-02 |
| 4.89  | 4.23  | 4.31   | 2.92   | 3.49   | 3.45   | 1.28E-02 |
| 4.89  | 4.23  | 4.31   | 2.92   | 3.49   | 3.45   | 1.28E-02 |
| 3.25  | 4.45  | 3.88   | 2.42   | 2.22   | 2.41   | 1.28E-02 |
| 4.91  | 4.63  | 5.06   | 2.75   | 0.0105 | 0.0109 | 1.29E-02 |
| 5.11  | 4.29  | 4.64   | 2.59   | 0.0105 | 0.0109 | 1.29E-02 |
| 4.16  | 3.69  | 5.06   | 2.78   | 2.29   | 2.21   | 1.30E-02 |
| 4.26  | 3.99  | 4.94   | 2.39   | 0.0105 | 0.0109 | 1.30E-02 |
| 4.77  | 5.34  | 4.82   | 2.8    | 0.0105 | 0.0109 | 1.31E-02 |
| 4.56  | 4.49  | 5.06   | 3.54   | 3.86   | 3.11   | 1.31E-02 |
| 4.56  | 4.49  | 5.06   | 3.54   | 3.86   | 3.11   | 1.31E-02 |
| 4.26  | 3.48  | 4.22   | 2.08   | 2.92   | 2.48   | 1.31E-02 |
| 5.22  | 5.27  | 4.55   | 0.0103 | 2.8    | 0.0109 | 1.32E-02 |
| 5.22  | 5.27  | 4.55   | 0.0103 | 2.8    | 0.0109 | 1.32E-02 |
| 3.63  | 4.02  | 3.6    | 3.08   | 2.77   | 2.42   | 1.32E-02 |
| 4.32  | 3.71  | 4.28   | 0.0103 | 0.0105 | 2.29   | 1.32E-02 |
| 4.98  | 4.68  | 4.96   | 0.0103 | 2.78   | 0.0109 | 1.32E-02 |
| 4.98  | 4.68  | 4.96   | 0.0103 | 2.78   | 0.0109 | 1.32E-02 |
| 4.64  | 4.17  | 3.21   | 2      | 0.0105 | 0.0109 | 1.32E-02 |
| 4.64  | 4.17  | 3.21   | 2      | 0.0105 | 0.0109 | 1.32E-02 |
| 3.66  | 4.16  | 4.78   | 0.0103 | 2.25   | 0.0109 | 1.34E-02 |
| 3.66  | 4.16  | 4.78   | 0.0103 | 2.25   | 0.0109 | 1.34E-02 |
| 4.12  | 3.69  | 4.35   | 0.0103 | 0.0105 | 2.27   | 1.34E-02 |
| 3.82  | 3.45  | 3.82   | 2.46   | 2.75   | 3.09   | 1.34E-02 |
| 3.82  | 3.45  | 3.82   | 2.46   | 2.75   | 3.09   | 1.34E-02 |
| 3.82  | 3.45  | 3.82   | 2.46   | 2.75   | 3.09   | 1.34E-02 |
| 3.68  | 3.31  | 4.2    | 0.0103 | 0.0105 | 2.03   | 1.34E-02 |
| 3.68  | 3.31  | 4.2    | 0.0103 | 0.0105 | 2.03   | 1.34E-02 |
| 0.011 | 0.012 | 0.0117 | 2.96   | 4.57   | 2      | 1.35E-02 |
| 0.011 | 0.012 | 0.0117 | 2.96   | 4.57   | 2      | 1.35E-02 |
| 3.7   | 3.81  | 4      | 3.11   | 3.36   | 2.84   | 1.35E-02 |
| 5.11  | 4.67  | 4.56   | 2.72   | 0.0105 | 0.0109 | 1.36E-02 |
| 4.52  | 4.42  | 4.17   | 3.42   | 2.67   | 3.48   | 1.36E-02 |
| 4.52  | 4.42  | 4.17   | 3.42   | 2.67   | 3.48   | 1.36E-02 |
| 4.55  | 3.49  | 4.55   | 2.23   | 0.0105 | 0.0109 | 1.37E-02 |
| 3.01  | 3.33  | 3.64   | 2.61   | 2.52   | 2.53   | 1.37E-02 |
| 3.01  | 3.33  | 3.64   | 2.61   | 2.52   | 2.53   | 1.37E-02 |
| 5.25  | 5.56  | 4.87   | 3.61   | 3.99   | 2.72   | 1.38E-02 |
| 5.25  | 5.56  | 4.87   | 3.61   | 3.99   | 2.72   | 1.38E-02 |
| 3.12  | 2.69  | 2.93   | 2.14   | 2.41   | 2.33   | 1.38E-02 |
| 4.33  | 4.22  | 3.76   | 0.0103 | 2.33   | 0.0109 | 1.38E-02 |
| 4.33  | 4.22  | 3.76   | 0.0103 | 2.33   | 0.0109 | 1.38E-02 |

|      |      |      |        |        |        |          |
|------|------|------|--------|--------|--------|----------|
| 4.71 | 4.54 | 4.7  | 0.0103 | 2.69   | 0.0109 | 1.38E-02 |
| 4.13 | 4.81 | 4.28 | 3.01   | 3.48   | 3.48   | 1.39E-02 |
| 3.99 | 4.4  | 4.74 | 0.0103 | 2.47   | 0.0109 | 1.39E-02 |
| 3.99 | 4.4  | 4.74 | 0.0103 | 2.47   | 0.0109 | 1.39E-02 |
| 4.63 | 5.12 | 4.55 | 2.22   | 3.64   | 2.82   | 1.39E-02 |
| 4.63 | 5.12 | 4.55 | 2.22   | 3.64   | 2.82   | 1.39E-02 |
| 4.71 | 2.04 | 4.94 | 0.0103 | 0.0105 | 0.0109 | 1.40E-02 |
| 4.27 | 4.05 | 4.31 | 2.38   | 3.43   | 2.89   | 1.40E-02 |
| 4.27 | 4.05 | 4.31 | 2.38   | 3.43   | 2.89   | 1.40E-02 |
| 4.94 | 3.45 | 4.59 | 2.23   | 2.49   | 2.52   | 1.41E-02 |
| 4.58 | 3.31 | 3.87 | 0.0103 | 2.06   | 0.0109 | 1.42E-02 |
| 4.58 | 3.31 | 3.87 | 0.0103 | 2.06   | 0.0109 | 1.42E-02 |
| 4.63 | 4.47 | 4.42 | 0.0103 | 2.62   | 0.0109 | 1.42E-02 |
| 3.8  | 3.73 | 3.79 | 3.03   | 3.35   | 3.42   | 1.42E-02 |
| 3.8  | 3.73 | 3.79 | 3.03   | 3.35   | 3.42   | 1.42E-02 |
| 3.8  | 3.73 | 3.79 | 3.03   | 3.35   | 3.42   | 1.42E-02 |
| 4.52 | 4.19 | 4.87 | 0.0103 | 2.59   | 0.0109 | 1.43E-02 |
| 4.52 | 4.19 | 4.87 | 0.0103 | 2.59   | 0.0109 | 1.43E-02 |
| 4.52 | 4.19 | 4.87 | 0.0103 | 2.59   | 0.0109 | 1.43E-02 |
| 4.93 | 4.34 | 4.81 | 3.19   | 3.91   | 3.11   | 1.44E-02 |
| 4.93 | 4.34 | 4.81 | 3.19   | 3.91   | 3.11   | 1.44E-02 |
| 4.93 | 4.34 | 4.81 | 3.19   | 3.91   | 3.11   | 1.44E-02 |
| 5.05 | 5.4  | 4.22 | 3.49   | 2.55   | 3.12   | 1.44E-02 |
| 5.05 | 5.4  | 4.22 | 3.49   | 2.55   | 3.12   | 1.44E-02 |
| 4.49 | 4.92 | 4.44 | 2.38   | 2.06   | 0.0109 | 1.44E-02 |
| 4.93 | 4.53 | 4.68 | 0.0103 | 2.74   | 0.0109 | 1.44E-02 |
| 4.93 | 4.53 | 4.68 | 0.0103 | 2.74   | 0.0109 | 1.44E-02 |
| 3.99 | 3.96 | 3.6  | 0.0103 | 2.23   | 0.0109 | 1.45E-02 |
| 4.94 | 3.45 | 4.59 | 2.23   | 0.0105 | 0.0109 | 1.45E-02 |
| 4.79 | 5.06 | 4.84 | 2.29   | 2.49   | 0.0109 | 1.45E-02 |
| 4.79 | 5.06 | 4.84 | 2.29   | 2.49   | 0.0109 | 1.45E-02 |
| 4.59 | 4.61 | 4.57 | 0.0103 | 2.69   | 0.0109 | 1.45E-02 |
| 4.59 | 4.61 | 4.57 | 0.0103 | 2.69   | 0.0109 | 1.45E-02 |
| 4.59 | 4.61 | 4.57 | 0.0103 | 2.69   | 0.0109 | 1.45E-02 |
| 4.93 | 4.98 | 4.7  | 0.0103 | 2.85   | 0.0109 | 1.46E-02 |
| 4.93 | 4.98 | 4.7  | 0.0103 | 2.85   | 0.0109 | 1.46E-02 |
| 2.99 | 3.71 | 3.44 | 2.59   | 2.46   | 2.29   | 1.48E-02 |
| 4.84 | 4.67 | 4.16 | 2.97   | 2.49   | 3.58   | 1.48E-02 |
| 3.99 | 3.55 | 3.83 | 3      | 3.3    | 3.16   | 1.48E-02 |
| 3.99 | 3.55 | 3.83 | 3      | 3.3    | 3.16   | 1.48E-02 |
| 4.01 | 3.57 | 4.1  | 2.25   | 0.0105 | 0.0109 | 1.48E-02 |
| 4.5  | 4.47 | 4.95 | 0.0103 | 2.7    | 0.0109 | 1.48E-02 |
| 4.5  | 4.47 | 4.95 | 0.0103 | 2.7    | 0.0109 | 1.48E-02 |
| 4.85 | 5.43 | 4.65 | 3.86   | 3.04   | 2.57   | 1.48E-02 |
| 4.12 | 3.92 | 3.91 | 2.34   | 0.0105 | 0.0109 | 1.48E-02 |
| 4.12 | 3.92 | 3.91 | 2.34   | 0.0105 | 0.0109 | 1.48E-02 |
| 4.58 | 3.84 | 4.37 | 3.46   | 2.98   | 2.91   | 1.49E-02 |
| 4.58 | 3.84 | 4.37 | 3.46   | 2.98   | 2.91   | 1.49E-02 |
| 5.35 | 4.59 | 5    | 0.0103 | 2.15   | 2.6    | 1.49E-02 |
| 5.35 | 4.61 | 4.87 | 2.86   | 0.0105 | 0.0109 | 1.50E-02 |
| 5.35 | 4.61 | 4.87 | 2.86   | 0.0105 | 0.0109 | 1.50E-02 |
| 3.97 | 3.85 | 3.8  | 2.52   | 3.33   | 2.78   | 1.50E-02 |
| 3.97 | 3.85 | 3.8  | 2.52   | 3.33   | 2.78   | 1.50E-02 |
| 4.2  | 4.57 | 3.72 | 2.4    | 3.22   | 2.61   | 1.51E-02 |
| 4.2  | 4.57 | 3.72 | 2.4    | 3.22   | 2.61   | 1.51E-02 |
| 4.49 | 4.41 | 4.1  | 3.46   | 3.06   | 2.39   | 1.51E-02 |
| 3.36 | 2.91 | 3.51 | 2.15   | 2.58   | 2.37   | 1.51E-02 |
| 3.36 | 2.91 | 3.51 | 2.15   | 2.58   | 2.37   | 1.51E-02 |

|       |      |        |        |        |        |          |
|-------|------|--------|--------|--------|--------|----------|
| 3.98  | 4.03 | 4.3    | 3.32   | 2.2    | 2.4    | 1.51E-02 |
| 3.8   | 4.27 | 3.82   | 0.0103 | 2.31   | 0.0109 | 1.51E-02 |
| 3.8   | 4.27 | 3.82   | 0.0103 | 2.31   | 0.0109 | 1.51E-02 |
| 3.4   | 3.75 | 3.95   | 0.0103 | 2.15   | 0.0109 | 1.52E-02 |
| 3.4   | 3.75 | 3.95   | 0.0103 | 2.15   | 0.0109 | 1.52E-02 |
| 4.19  | 3.36 | 3.6    | 2.71   | 2.71   | 2.72   | 1.52E-02 |
| 4.19  | 3.36 | 3.6    | 2.71   | 2.71   | 2.72   | 1.52E-02 |
| 5.55  | 4.42 | 5.16   | 3.6    | 3.72   | 3.05   | 1.53E-02 |
| 5.55  | 4.42 | 5.16   | 3.6    | 3.72   | 3.05   | 1.53E-02 |
| 0.011 | 2.14 | 0.0117 | 4.54   | 4.47   | 3.23   | 1.53E-02 |
| 5.06  | 5.04 | 4.25   | 3.73   | 2.88   | 2.71   | 1.54E-02 |
| 5.06  | 5.04 | 4.25   | 3.73   | 2.88   | 2.71   | 1.54E-02 |
| 3.76  | 3.88 | 4.01   | 0.0103 | 0.0105 | 2.3    | 1.54E-02 |
| 4.18  | 4.26 | 3.87   | 0.0103 | 2.42   | 0.0109 | 1.55E-02 |
| 4.18  | 4.26 | 3.87   | 0.0103 | 2.42   | 0.0109 | 1.55E-02 |
| 4.81  | 4.73 | 4.22   | 3.44   | 3.92   | 3.5    | 1.55E-02 |
| 4.81  | 4.73 | 4.22   | 3.44   | 3.92   | 3.5    | 1.55E-02 |
| 4.37  | 5.03 | 4.94   | 0.0103 | 2.79   | 0.0109 | 1.55E-02 |
| 4.37  | 5.03 | 4.94   | 0.0103 | 2.79   | 0.0109 | 1.55E-02 |
| 4.07  | 3.76 | 3.68   | 2.7    | 3.29   | 3      | 1.56E-02 |
| 4.07  | 3.76 | 3.68   | 2.7    | 3.29   | 3      | 1.56E-02 |
| 4.1   | 3.71 | 4.44   | 0.0103 | 0.0105 | 2.37   | 1.57E-02 |
| 4.1   | 3.71 | 4.44   | 0.0103 | 0.0105 | 2.37   | 1.57E-02 |
| 4.08  | 4.71 | 3.73   | 2.97   | 3.09   | 2.66   | 1.57E-02 |
| 4.08  | 4.71 | 3.73   | 2.97   | 3.09   | 2.66   | 1.57E-02 |
| 3.44  | 3.43 | 3.91   | 2.69   | 2.83   | 2.17   | 1.58E-02 |
| 3.44  | 3.43 | 3.91   | 2.69   | 2.83   | 2.17   | 1.58E-02 |
| 4.49  | 4.51 | 4.03   | 2.25   | 2.86   | 3.42   | 1.58E-02 |
| 4.49  | 4.51 | 4.03   | 2.25   | 2.86   | 3.42   | 1.58E-02 |
| 3.89  | 3.49 | 3.81   | 2.63   | 3.2    | 2.88   | 1.58E-02 |
| 4.38  | 4.99 | 5.09   | 2.9    | 3.84   | 3.47   | 1.58E-02 |
| 4.38  | 4.99 | 5.09   | 2.9    | 3.84   | 3.47   | 1.58E-02 |
| 4.21  | 4.77 | 5.08   | 0.0103 | 0.0105 | 2.72   | 1.59E-02 |
| 4.51  | 3.85 | 4.77   | 2.36   | 3.33   | 2.66   | 1.59E-02 |
| 4.51  | 3.85 | 4.77   | 2.36   | 3.33   | 2.66   | 1.59E-02 |
| 4.83  | 4.08 | 5.03   | 2.14   | 3.4    | 2.8    | 1.59E-02 |
| 4.83  | 4.08 | 5.03   | 2.14   | 3.4    | 2.8    | 1.59E-02 |
| 3.59  | 3.58 | 3.66   | 3.35   | 3      | 2.96   | 1.60E-02 |
| 4.29  | 4.4  | 4.31   | 2.6    | 0.0105 | 0.0109 | 1.61E-02 |
| 4.29  | 4.4  | 4.31   | 2.6    | 0.0105 | 0.0109 | 1.61E-02 |
| 4.29  | 4.4  | 4.31   | 2.6    | 0.0105 | 0.0109 | 1.61E-02 |
| 3.8   | 4.06 | 4.56   | 2.13   | 3.05   | 2.9    | 1.62E-02 |
| 3.8   | 4.06 | 4.56   | 2.13   | 3.05   | 2.9    | 1.62E-02 |
| 3.65  | 4.14 | 4.29   | 0.0103 | 2.37   | 0.0109 | 1.63E-02 |
| 4.63  | 3.72 | 4.14   | 2.99   | 3.19   | 3.09   | 1.63E-02 |
| 4.63  | 3.72 | 4.14   | 2.99   | 3.19   | 3.09   | 1.63E-02 |
| 4.63  | 3.72 | 4.14   | 2.99   | 3.19   | 3.09   | 1.63E-02 |
| 3.63  | 3.32 | 3.64   | 2.11   | 0.0105 | 0.0109 | 1.63E-02 |
| 3.63  | 3.32 | 3.64   | 2.11   | 0.0105 | 0.0109 | 1.63E-02 |
| 3.63  | 3.32 | 3.64   | 2.11   | 0.0105 | 0.0109 | 1.63E-02 |
| 4.12  | 4.79 | 3.8    | 2.53   | 3.22   | 2.6    | 1.64E-02 |
| 4.12  | 4.79 | 3.8    | 2.53   | 3.22   | 2.6    | 1.64E-02 |
| 5.61  | 4.75 | 4.79   | 3.16   | 3.87   | 2.6    | 1.64E-02 |
| 5.61  | 4.75 | 4.79   | 3.16   | 3.87   | 2.6    | 1.64E-02 |
| 3.4   | 4.49 | 4      | 0.0103 | 0.0105 | 2.24   | 1.65E-02 |
| 4.01  | 3.62 | 3.45   | 2.15   | 2.44   | 2.98   | 1.65E-02 |
| 5.05  | 5.56 | 5.31   | 4.12   | 3.88   | 2.81   | 1.65E-02 |
| 5.05  | 5.56 | 5.31   | 4.12   | 3.88   | 2.81   | 1.65E-02 |

|       |       |        |        |        |        |          |
|-------|-------|--------|--------|--------|--------|----------|
| 3.55  | 3.27  | 3.47   | 3.05   | 3.13   | 3.08   | 1.65E-02 |
| 5.5   | 5.09  | 4.79   | 0.0103 | 3.05   | 0.0109 | 1.66E-02 |
| 5.04  | 4.66  | 4.73   | 3.09   | 4.07   | 3.03   | 1.67E-02 |
| 5.17  | 5.69  | 4.82   | 3.73   | 3.93   | 2.75   | 1.67E-02 |
| 5.17  | 5.69  | 4.82   | 3.73   | 3.93   | 2.75   | 1.67E-02 |
| 4.15  | 3.57  | 4.24   | 2.92   | 2.96   | 2.18   | 1.68E-02 |
| 4.15  | 3.57  | 4.24   | 2.92   | 2.96   | 2.18   | 1.68E-02 |
| 2.04  | 0.012 | 0.0117 | 3.13   | 3.46   | 3.93   | 1.69E-02 |
| 4.275 | 3.695 | 3.285  | 0.0103 | 0.0105 | 2.15   | 1.70E-02 |
| 4.24  | 5.38  | 3.86   | 2.39   | 2.38   | 2.92   | 1.70E-02 |
| 3.83  | 3.74  | 4.21   | 2.36   | 0.0105 | 0.0109 | 1.70E-02 |
| 3.83  | 3.74  | 4.21   | 2.36   | 0.0105 | 0.0109 | 1.70E-02 |
| 4.54  | 3.94  | 4.15   | 3.25   | 3.49   | 3.55   | 1.70E-02 |
| 4.54  | 3.94  | 4.15   | 3.25   | 3.49   | 3.55   | 1.70E-02 |
| 4.85  | 4.96  | 4.73   | 2.6    | 3.99   | 3.1    | 1.72E-02 |
| 4.85  | 4.96  | 4.73   | 2.6    | 3.99   | 3.1    | 1.72E-02 |
| 4.85  | 4.96  | 4.73   | 2.6    | 3.99   | 3.1    | 1.72E-02 |
| 3.7   | 3.19  | 3.74   | 0.0103 | 2.11   | 0.0109 | 1.72E-02 |
| 3.7   | 3.19  | 3.74   | 0.0103 | 2.11   | 0.0109 | 1.72E-02 |
| 4.96  | 5.58  | 4.78   | 3.99   | 3.12   | 2.57   | 1.72E-02 |
| 4.07  | 3.95  | 4.12   | 2.47   | 0.0105 | 0.0109 | 1.73E-02 |
| 5.28  | 5.44  | 4.35   | 3.11   | 3.85   | 2.93   | 1.74E-02 |
| 5.28  | 5.44  | 4.35   | 3.11   | 3.85   | 2.93   | 1.74E-02 |
| 5.28  | 5.44  | 4.35   | 3.11   | 3.85   | 2.93   | 1.74E-02 |
| 3.57  | 3.35  | 4.05   | 0.0103 | 0.0105 | 2.17   | 1.74E-02 |
| 3.57  | 3.35  | 4.05   | 0.0103 | 0.0105 | 2.17   | 1.74E-02 |
| 3.74  | 3.91  | 3.83   | 2.34   | 0.0105 | 0.0109 | 1.74E-02 |
| 4.62  | 4.2   | 3.83   | 2.51   | 0.0105 | 0.0109 | 1.75E-02 |
| 4.62  | 4.2   | 3.83   | 2.51   | 0.0105 | 0.0109 | 1.75E-02 |
| 3.47  | 3.63  | 3.36   | 0.0103 | 0.0105 | 2.13   | 1.76E-02 |
| 3.47  | 3.63  | 3.36   | 0.0103 | 0.0105 | 2.13   | 1.76E-02 |
| 4.21  | 5.18  | 5.15   | 0.0103 | 2.85   | 0.0109 | 1.76E-02 |
| 4.62  | 3.96  | 4.78   | 0.0103 | 2.65   | 0.0109 | 1.76E-02 |
| 4.62  | 3.96  | 4.78   | 0.0103 | 2.65   | 0.0109 | 1.76E-02 |
| 3.66  | 4.16  | 4.78   | 2.43   | 0.0105 | 0.0109 | 1.77E-02 |
| 4.36  | 3.83  | 5.19   | 3      | 2.93   | 2.53   | 1.77E-02 |
| 4.36  | 3.83  | 5.19   | 3      | 2.93   | 2.53   | 1.77E-02 |
| 5.56  | 4.55  | 4.93   | 2.98   | 0.0105 | 0.0109 | 1.78E-02 |
| 4.82  | 4.57  | 4.81   | 2.4    | 2.42   | 0.0109 | 1.78E-02 |
| 4.82  | 4.57  | 4.81   | 2.4    | 2.42   | 0.0109 | 1.78E-02 |
| 4.56  | 4.73  | 3.69   | 0.0103 | 0.0105 | 2.52   | 1.78E-02 |
| 5.07  | 5.26  | 5.14   | 3.17   | 0.0105 | 0.0109 | 1.78E-02 |
| 4.12  | 3.74  | 3.97   | 0.0103 | 2.41   | 0.0109 | 1.78E-02 |
| 4.86  | 4.67  | 4.43   | 2.72   | 3.85   | 2.66   | 1.79E-02 |
| 3.95  | 5.17  | 5.07   | 2.66   | 3.41   | 2.45   | 1.79E-02 |
| 4.55  | 3.49  | 4.55   | 0.0103 | 2.41   | 0.0109 | 1.80E-02 |
| 3.02  | 3.6   | 3.78   | 2.05   | 0.0105 | 0.0109 | 1.80E-02 |
| 4.86  | 5.65  | 5.16   | 2.66   | 2.57   | 0.0109 | 1.80E-02 |
| 4.86  | 5.65  | 5.16   | 2.66   | 2.57   | 0.0109 | 1.80E-02 |
| 3.23  | 4.05  | 3.57   | 0.0103 | 2.14   | 0.0109 | 1.80E-02 |
| 3.23  | 4.05  | 3.57   | 0.0103 | 2.14   | 0.0109 | 1.80E-02 |
| 3.23  | 4.05  | 3.57   | 0.0103 | 2.14   | 0.0109 | 1.80E-02 |
| 5.21  | 3.98  | 4.41   | 3.31   | 2.92   | 2.94   | 1.81E-02 |
| 5.21  | 3.98  | 4.41   | 3.31   | 2.92   | 2.94   | 1.81E-02 |
| 2.13  | 0.012 | 0.0117 | 3.67   | 3.46   | 3.3    | 1.81E-02 |
| 2.13  | 0.012 | 0.0117 | 3.67   | 3.46   | 3.3    | 1.81E-02 |
| 4.39  | 4.04  | 3.65   | 2.06   | 3.12   | 2.58   | 1.82E-02 |
| 3.23  | 3.77  | 3.35   | 2.09   | 0.0105 | 0.0109 | 1.82E-02 |

|       |       |        |        |        |        |          |
|-------|-------|--------|--------|--------|--------|----------|
| 4.15  | 4.17  | 3.58   | 2.29   | 2.78   | 3.16   | 1.83E-02 |
| 4.15  | 4.17  | 3.58   | 2.29   | 2.78   | 3.16   | 1.83E-02 |
| 3.62  | 3.96  | 4.01   | 0.0103 | 2.37   | 0.0109 | 1.83E-02 |
| 5.05  | 4.45  | 4.22   | 3.03   | 3.49   | 2.31   | 1.83E-02 |
| 3.18  | 4.23  | 3.56   | 2.34   | 2.45   | 2.56   | 1.83E-02 |
| 3.18  | 4.23  | 3.56   | 2.34   | 2.45   | 2.56   | 1.83E-02 |
| 0.011 | 2.16  | 0.0117 | 3.17   | 3.76   | 3.98   | 1.83E-02 |
| 4.89  | 3.76  | 4.44   | 0.0103 | 2.56   | 0.0109 | 1.84E-02 |
| 4.89  | 3.76  | 4.44   | 0.0103 | 2.56   | 0.0109 | 1.84E-02 |
| 4     | 3.77  | 3.95   | 0.0103 | 2.42   | 0.0109 | 1.85E-02 |
| 3.48  | 4.21  | 4.41   | 0.0103 | 2.39   | 0.0109 | 1.85E-02 |
| 4.81  | 4.04  | 4.95   | 2.44   | 2.07   | 0.0109 | 1.86E-02 |
| 3.7   | 3.63  | 4.17   | 0.0103 | 2.34   | 0.0109 | 1.86E-02 |
| 3.7   | 3.63  | 4.17   | 0.0103 | 2.34   | 0.0109 | 1.86E-02 |
| 3.57  | 4.23  | 3.85   | 0.0103 | 2.36   | 0.0109 | 1.86E-02 |
| 4.9   | 5.07  | 5.25   | 2.72   | 4.19   | 3.22   | 1.86E-02 |
| 4.9   | 5.07  | 5.25   | 2.72   | 4.19   | 3.22   | 1.86E-02 |
| 4.26  | 4.62  | 4.54   | 0.0103 | 2.48   | 2.08   | 1.88E-02 |
| 4.75  | 4.27  | 5.86   | 0.0103 | 0.0105 | 2.83   | 1.89E-02 |
| 3.62  | 3.96  | 4.01   | 2.39   | 0.0105 | 0.0109 | 1.89E-02 |
| 3.59  | 2.95  | 3.37   | 2.24   | 2.48   | 2.65   | 1.89E-02 |
| 4.01  | 3.35  | 4.07   | 0.0103 | 2.3    | 0.0109 | 1.90E-02 |
| 4.01  | 3.35  | 4.07   | 0.0103 | 2.3    | 0.0109 | 1.90E-02 |
| 3.83  | 4.35  | 3.57   | 0.0103 | 2.37   | 0.0109 | 1.90E-02 |
| 5.07  | 4.6   | 5.31   | 0.0103 | 3.07   | 0.0109 | 1.90E-02 |
| 5.34  | 4.37  | 4.77   | 3.05   | 3.66   | 2.33   | 1.90E-02 |
| 5.34  | 4.37  | 4.77   | 3.05   | 3.66   | 2.33   | 1.90E-02 |
| 3.68  | 3.31  | 4.2    | 0.0103 | 2.23   | 0.0109 | 1.91E-02 |
| 3.68  | 3.31  | 4.2    | 0.0103 | 2.23   | 0.0109 | 1.91E-02 |
| 4.54  | 4.69  | 4.22   | 0.0103 | 2.78   | 0.0109 | 1.91E-02 |
| 4.13  | 4.6   | 4.29   | 0.0103 | 2.69   | 0.0109 | 1.91E-02 |
| 3.04  | 3.62  | 3.19   | 2.65   | 1.97   | 2.22   | 1.91E-02 |
| 2.88  | 2.86  | 2.92   | 2.26   | 2.56   | 2.6    | 1.91E-02 |
| 3.75  | 4.14  | 3.87   | 2.38   | 2.89   | 3.27   | 1.91E-02 |
| 3.75  | 4.14  | 3.87   | 2.38   | 2.89   | 3.27   | 1.91E-02 |
| 3.75  | 4.14  | 3.87   | 2.38   | 2.89   | 3.27   | 1.91E-02 |
| 3.4   | 3.95  | 3.4    | 0.0103 | 2.19   | 0.0109 | 1.91E-02 |
| 3.57  | 4.43  | 3.24   | 0.0103 | 0.0105 | 2.15   | 1.92E-02 |
| 3.57  | 4.43  | 3.24   | 0.0103 | 0.0105 | 2.15   | 1.92E-02 |
| 3.62  | 4.11  | 3.9    | 0.0103 | 2.4    | 0.0109 | 1.92E-02 |
| 4.17  | 4.63  | 3.69   | 0.0103 | 2.51   | 0.0109 | 1.93E-02 |
| 4.17  | 4.63  | 3.69   | 0.0103 | 2.51   | 0.0109 | 1.93E-02 |
| 4.17  | 4.63  | 3.69   | 0.0103 | 2.51   | 0.0109 | 1.93E-02 |
| 2.15  | 0.012 | 0.0117 | 4.1    | 3.05   | 3.89   | 1.94E-02 |
| 4.03  | 4.1   | 4.54   | 0.0103 | 2.62   | 0.0109 | 1.94E-02 |
| 4.03  | 3.21  | 4.58   | 0.0103 | 2.24   | 0.0109 | 1.94E-02 |
| 4.36  | 4     | 3.86   | 0.0103 | 2.53   | 0.0109 | 1.95E-02 |
| 3.7   | 3.48  | 3.18   | 2.78   | 2.96   | 2.69   | 1.95E-02 |
| 3.7   | 3.48  | 3.18   | 2.78   | 2.96   | 2.69   | 1.95E-02 |
| 4.3   | 4.42  | 4.25   | 3.51   | 3.21   | 2.38   | 1.95E-02 |
| 4.3   | 4.42  | 4.25   | 3.51   | 3.21   | 2.38   | 1.95E-02 |
| 0.011 | 0.012 | 2.26   | 3.69   | 3.41   | 3.74   | 1.96E-02 |
| 3.67  | 3.67  | 3.44   | 0.0103 | 2.26   | 0.0109 | 1.98E-02 |
| 3.67  | 3.67  | 3.44   | 0.0103 | 2.26   | 0.0109 | 1.98E-02 |
| 4.21  | 4.76  | 3.99   | 2.09   | 3.37   | 2.56   | 1.98E-02 |
| 3.32  | 3.67  | 3.13   | 2.53   | 2.64   | 2.86   | 1.99E-02 |
| 3.32  | 3.67  | 3.13   | 2.53   | 2.64   | 2.86   | 1.99E-02 |
| 4.45  | 4.42  | 4.88   | 0.0103 | 2.87   | 0.0109 | 1.99E-02 |



|      |       |        |        |        |        |          |
|------|-------|--------|--------|--------|--------|----------|
| 5.11 | 4.29  | 4.64   | 2.2    | 3.59   | 2.99   | 1.99E-02 |
| 5.11 | 4.29  | 4.64   | 2.2    | 3.59   | 2.99   | 1.99E-02 |
| 4.61 | 3.92  | 4.98   | 3.43   | 2.85   | 2.41   | 2.00E-02 |
| 4.61 | 3.92  | 4.98   | 3.43   | 2.85   | 2.41   | 2.00E-02 |
| 5.18 | 4.6   | 4.97   | 2.22   | 3.9    | 2.58   | 2.00E-02 |
| 4.9  | 4.88  | 4.57   | 3.54   | 3.72   | 2.44   | 2.01E-02 |
| 4.7  | 3.72  | 4.33   | 3.29   | 3.02   | 3.11   | 2.01E-02 |
| 4.7  | 3.72  | 4.33   | 3.29   | 3.02   | 3.11   | 2.01E-02 |
| 4.27 | 3.66  | 5.05   | 2.88   | 2.74   | 2.1    | 2.01E-02 |
| 4.27 | 3.66  | 5.05   | 2.88   | 2.74   | 2.1    | 2.01E-02 |
| 3.31 | 3.5   | 4.13   | 2.47   | 2.86   | 2.43   | 2.01E-02 |
| 3.29 | 3.74  | 4.38   | 0.0103 | 0.0105 | 2.26   | 2.01E-02 |
| 4.43 | 4.23  | 4.08   | 0.0103 | 2.68   | 0.0109 | 2.02E-02 |
| 3.99 | 4.58  | 4.11   | 0.0103 | 2.64   | 0.0109 | 2.03E-02 |
| 3.99 | 4.58  | 4.11   | 0.0103 | 2.64   | 0.0109 | 2.03E-02 |
| 4.69 | 4.5   | 4.43   | 3.7    | 3.79   | 2.92   | 2.03E-02 |
| 4.69 | 4.5   | 4.43   | 3.7    | 3.79   | 2.92   | 2.03E-02 |
| 5.25 | 5.12  | 5.42   | 3.62   | 4.66   | 3.91   | 2.03E-02 |
| 5.25 | 5.12  | 5.42   | 3.62   | 4.66   | 3.91   | 2.03E-02 |
| 3.94 | 4.56  | 3.72   | 0.0103 | 0.0105 | 2.5    | 2.03E-02 |
| 3.94 | 4.56  | 3.72   | 0.0103 | 0.0105 | 2.5    | 2.03E-02 |
| 4.47 | 4.58  | 3.62   | 2.56   | 0.0105 | 0.0109 | 2.03E-02 |
| 4.38 | 4.89  | 4.13   | 2.78   | 0.0105 | 0.0109 | 2.05E-02 |
| 3.36 | 3.84  | 3.98   | 2.89   | 3.05   | 3.06   | 2.06E-02 |
| 3.36 | 3.84  | 3.98   | 2.89   | 3.05   | 3.06   | 2.06E-02 |
| 3.56 | 3.52  | 3.8    | 0.0103 | 2.3    | 0.0109 | 2.06E-02 |
| 3.56 | 3.52  | 3.8    | 0.0103 | 2.3    | 0.0109 | 2.06E-02 |
| 4.78 | 4.09  | 4.09   | 3.49   | 2.89   | 2.52   | 2.06E-02 |
| 2.52 | 0.012 | 0.0117 | 3.48   | 4.74   | 4.97   | 2.06E-02 |
| 4.7  | 3.62  | 4.86   | 2.62   | 3.16   | 2.44   | 2.06E-02 |
| 5.21 | 4.57  | 4.68   | 2.63   | 3.94   | 3.08   | 2.06E-02 |
| 5.21 | 4.57  | 4.68   | 2.63   | 3.94   | 3.08   | 2.06E-02 |
| 4.43 | 3.06  | 3.53   | 0.0103 | 2.09   | 0.0109 | 2.07E-02 |
| 3.91 | 4.51  | 3.88   | 2.56   | 0.0105 | 0.0109 | 2.07E-02 |
| 4.69 | 4.52  | 4.2    | 2.88   | 3.66   | 2.35   | 2.07E-02 |
| 4.69 | 4.52  | 4.2    | 2.88   | 3.66   | 2.35   | 2.07E-02 |
| 4.64 | 4.66  | 4.05   | 2.26   | 2.33   | 0.0109 | 2.08E-02 |
| 3.88 | 4.06  | 3.99   | 2.36   | 3.39   | 2.82   | 2.08E-02 |
| 4.61 | 3.77  | 4.11   | 2.26   | 3.3    | 2.34   | 2.09E-02 |
| 4.61 | 3.77  | 4.11   | 2.26   | 3.3    | 2.34   | 2.09E-02 |
| 4.45 | 4.63  | 3.07   | 0.0103 | 2.24   | 0.0109 | 2.09E-02 |
| 4.45 | 4.63  | 3.07   | 0.0103 | 2.24   | 0.0109 | 2.09E-02 |
| 4.87 | 5.07  | 4.57   | 2.21   | 3.69   | 3.37   | 2.09E-02 |
| 4.26 | 3.99  | 4.94   | 0.0103 | 0.0105 | 2.71   | 2.09E-02 |
| 3.62 | 4.06  | 3.78   | 2.42   | 0.0105 | 0.0109 | 2.09E-02 |
| 3.62 | 4.06  | 3.78   | 2.42   | 0.0105 | 0.0109 | 2.09E-02 |
| 3.36 | 3.51  | 3.7    | 0.0103 | 2.24   | 0.0109 | 2.09E-02 |
| 5.63 | 4.94  | 5.68   | 3.34   | 4.52   | 3.45   | 2.09E-02 |
| 5.63 | 4.94  | 5.68   | 3.34   | 4.52   | 3.45   | 2.09E-02 |
| 5.63 | 4.94  | 5.68   | 3.34   | 4.52   | 3.45   | 2.09E-02 |
| 4.6  | 3.9   | 3.45   | 0.0103 | 2.39   | 0.0109 | 2.10E-02 |
| 3.92 | 2.97  | 3.95   | 0.0103 | 2.15   | 0.0109 | 2.10E-02 |
| 2.92 | 3.22  | 3.11   | 3.44   | 3.73   | 3.93   | 2.10E-02 |
| 4.66 | 3.95  | 4.86   | 0.0103 | 2.78   | 0.0109 | 2.10E-02 |
| 4.66 | 3.95  | 4.86   | 0.0103 | 2.78   | 0.0109 | 2.10E-02 |
| 2.01 | 0.012 | 0.0117 | 3.08   | 3.1    | 3.25   | 2.10E-02 |
| 4.36 | 4.06  | 3.76   | 0.0103 | 2.56   | 0.0109 | 2.10E-02 |
| 5.34 | 5.45  | 5.57   | 0.0103 | 3.49   | 0.0109 | 2.11E-02 |

|       |       |        |        |        |        |          |
|-------|-------|--------|--------|--------|--------|----------|
| 2.18  | 0.012 | 0.0117 | 3.48   | 3.48   | 3.27   | 2.11E-02 |
| 3.76  | 3.46  | 4.47   | 0.0103 | 0.0105 | 2.37   | 2.11E-02 |
| 4.12  | 3.14  | 3.32   | 2.12   | 0.0105 | 0.0109 | 2.13E-02 |
| 4.12  | 3.14  | 3.32   | 2.12   | 0.0105 | 0.0109 | 2.13E-02 |
| 5.35  | 5.11  | 4.44   | 0.0103 | 3.11   | 0.0109 | 2.14E-02 |
| 4.17  | 3.52  | 3.51   | 0.0103 | 2.33   | 0.0109 | 2.14E-02 |
| 4.52  | 4.79  | 4.12   | 2.3    | 3.62   | 2.48   | 2.14E-02 |
| 4.52  | 4.79  | 4.12   | 2.3    | 3.62   | 2.48   | 2.14E-02 |
| 3.66  | 3.98  | 3.84   | 0.0103 | 2.45   | 0.0109 | 2.14E-02 |
| 3.66  | 3.98  | 3.84   | 0.0103 | 2.45   | 0.0109 | 2.14E-02 |
| 3.8   | 4.92  | 4.06   | 0.0103 | 2.59   | 0.0109 | 2.14E-02 |
| 3.8   | 4.92  | 4.06   | 0.0103 | 2.59   | 0.0109 | 2.14E-02 |
| 3.58  | 3.81  | 3.56   | 2.34   | 0.0105 | 0.0109 | 2.14E-02 |
| 4.94  | 3.45  | 4.59   | 0.0103 | 0.0105 | 2.52   | 2.15E-02 |
| 4.42  | 3.76  | 3.94   | 2.55   | 0.0105 | 0.0109 | 2.15E-02 |
| 2.41  | 0.012 | 0.0117 | 3.77   | 4.23   | 3.5    | 2.17E-02 |
| 2.41  | 0.012 | 0.0117 | 3.77   | 4.23   | 3.5    | 2.17E-02 |
| 5.5   | 5.09  | 4.79   | 0.0103 | 3.05   | 2.17   | 2.17E-02 |
| 4.26  | 3.56  | 4.23   | 2.9    | 3.3    | 2.72   | 2.17E-02 |
| 4.26  | 3.56  | 4.23   | 2.9    | 3.3    | 2.72   | 2.17E-02 |
| 4     | 3.8   | 4.09   | 0.0103 | 2.55   | 0.0109 | 2.18E-02 |
| 4     | 3.8   | 4.09   | 0.0103 | 2.55   | 0.0109 | 2.18E-02 |
| 4.37  | 4.1   | 4.53   | 0.0103 | 0.0105 | 2.78   | 2.18E-02 |
| 3.61  | 4.1   | 4.51   | 0.0103 | 2.54   | 0.0109 | 2.18E-02 |
| 3.61  | 4.1   | 4.51   | 0.0103 | 2.54   | 0.0109 | 2.18E-02 |
| 3.44  | 4.37  | 4.25   | 0.0103 | 2.48   | 0.0109 | 2.18E-02 |
| 3.44  | 4.37  | 4.25   | 0.0103 | 2.48   | 0.0109 | 2.18E-02 |
| 3.84  | 3.91  | 4.73   | 0.0103 | 0.0105 | 2.58   | 2.18E-02 |
| 2.26  | 0.012 | 0.0117 | 4.37   | 3.53   | 3.31   | 2.18E-02 |
| 3.24  | 3.51  | 3.92   | 0.0103 | 2.24   | 0.0109 | 2.19E-02 |
| 3.24  | 3.51  | 3.92   | 0.0103 | 2.24   | 0.0109 | 2.19E-02 |
| 4.96  | 4.65  | 4.83   | 2.44   | 2.54   | 3.97   | 2.19E-02 |
| 4.96  | 4.65  | 4.83   | 2.44   | 2.54   | 3.97   | 2.19E-02 |
| 0.011 | 2.18  | 0.0117 | 4.01   | 3.09   | 3.52   | 2.19E-02 |
| 4.25  | 4.07  | 4.46   | 0.0103 | 2.74   | 0.0109 | 2.19E-02 |
| 3.67  | 4.12  | 4.35   | 3.23   | 3.22   | 2.64   | 2.19E-02 |
| 4.81  | 3.93  | 4.67   | 0.0103 | 2.8    | 0.0109 | 2.19E-02 |
| 4.81  | 3.93  | 4.67   | 0.0103 | 2.8    | 0.0109 | 2.19E-02 |
| 4.81  | 3.93  | 4.67   | 0.0103 | 2.8    | 0.0109 | 2.19E-02 |
| 3.85  | 2.83  | 3.86   | 0.0103 | 0.0105 | 2.09   | 2.20E-02 |
| 3.99  | 3.69  | 3.25   | 2.91   | 2.81   | 2.49   | 2.21E-02 |
| 3.99  | 3.69  | 3.25   | 2.91   | 2.81   | 2.49   | 2.21E-02 |
| 3.98  | 3.89  | 3.57   | 0.0103 | 2.45   | 0.0109 | 2.21E-02 |
| 5.28  | 4.45  | 4.35   | 0.0103 | 2.94   | 0.0109 | 2.21E-02 |
| 4.05  | 3.11  | 3.11   | 0.0103 | 2.06   | 0.0109 | 2.21E-02 |
| 4.98  | 4.96  | 4.44   | 2.54   | 3.95   | 2.88   | 2.22E-02 |
| 3.38  | 3.36  | 3.43   | 0.0103 | 2.2    | 0.0109 | 2.22E-02 |
| 3.38  | 3.36  | 3.43   | 0.0103 | 2.2    | 0.0109 | 2.22E-02 |
| 3.45  | 4.49  | 4.4    | 0.0103 | 2.52   | 0.0109 | 2.22E-02 |
| 4.11  | 4.11  | 4.6    | 2.74   | 0.0105 | 0.0109 | 2.22E-02 |
| 4.01  | 3.57  | 4.1    | 0.0103 | 0.0105 | 2.49   | 2.22E-02 |
| 4.14  | 3.73  | 4.47   | 0.0103 | 2.61   | 0.0109 | 2.22E-02 |
| 4.71  | 3.39  | 4.47   | 0.0103 | 2.5    | 0.0109 | 2.22E-02 |
| 4.71  | 3.39  | 4.47   | 0.0103 | 2.5    | 0.0109 | 2.22E-02 |
| 5.35  | 4.61  | 4.87   | 2.86   | 2.25   | 0.0109 | 2.23E-02 |
| 4.77  | 5.34  | 4.82   | 2.8    | 2.42   | 0.0109 | 2.23E-02 |
| 4.72  | 4.62  | 5.48   | 3.35   | 4.04   | 3.01   | 2.23E-02 |
| 4.72  | 4.62  | 5.48   | 3.35   | 4.04   | 3.01   | 2.23E-02 |

|       |      |        |        |        |        |          |
|-------|------|--------|--------|--------|--------|----------|
| 2.76  | 3.22 | 3.02   | 2.48   | 2.57   | 2.36   | 2.24E-02 |
| 3.67  | 4.18 | 4.36   | 0.0103 | 0.0105 | 2.59   | 2.24E-02 |
| 3.67  | 4.18 | 4.36   | 0.0103 | 0.0105 | 2.59   | 2.24E-02 |
| 3.14  | 4.53 | 3.76   | 2.24   | 0.0105 | 0.0109 | 2.24E-02 |
| 3.66  | 3.66 | 4.58   | 0.0103 | 2.45   | 0.0109 | 2.24E-02 |
| 3.66  | 3.66 | 4.58   | 0.0103 | 2.45   | 0.0109 | 2.24E-02 |
| 2.79  | 3.42 | 2.65   | 2.09   | 2.12   | 2.08   | 2.25E-02 |
| 3.96  | 4.03 | 3.28   | 2.27   | 2.52   | 3      | 2.25E-02 |
| 3.51  | 4.25 | 3.63   | 2.5    | 3.06   | 2.79   | 2.25E-02 |
| 3.1   | 3.09 | 3.21   | 0.0103 | 0.0105 | 2.04   | 2.26E-02 |
| 4.99  | 4.2  | 4.19   | 0.0103 | 0.0105 | 2.82   | 2.26E-02 |
| 5.57  | 4.84 | 5.2    | 3.56   | 2.63   | 4.14   | 2.26E-02 |
| 5.57  | 4.84 | 5.2    | 3.56   | 2.63   | 4.14   | 2.26E-02 |
| 3.68  | 3.49 | 3.49   | 3.04   | 2.94   | 2.39   | 2.27E-02 |
| 3.68  | 3.49 | 3.49   | 3.04   | 2.94   | 2.39   | 2.27E-02 |
| 3.68  | 3.49 | 3.49   | 3.04   | 2.94   | 2.39   | 2.27E-02 |
| 4.24  | 3.95 | 3.06   | 0.0103 | 2.26   | 0.0109 | 2.27E-02 |
| 4.24  | 3.95 | 3.06   | 0.0103 | 2.26   | 0.0109 | 2.27E-02 |
| 3.59  | 4.01 | 3.87   | 2.56   | 3.31   | 2.52   | 2.27E-02 |
| 4     | 3.18 | 4.09   | 0.0103 | 2.33   | 0.0109 | 2.27E-02 |
| 5.11  | 4.09 | 4      | 2.45   | 3.06   | 3.16   | 2.28E-02 |
| 4.19  | 4.55 | 5.53   | 0.0103 | 2.92   | 0.0109 | 2.28E-02 |
| 4.22  | 3.47 | 4.21   | 3.06   | 3.13   | 3      | 2.28E-02 |
| 4.22  | 3.47 | 4.21   | 3.06   | 3.13   | 3      | 2.28E-02 |
| 0.011 | 2.16 | 0.0117 | 2.92   | 4.43   | 3.92   | 2.28E-02 |
| 4.47  | 3.04 | 4.27   | 0.0103 | 2.28   | 0.0109 | 2.28E-02 |
| 4.47  | 3.04 | 4.27   | 0.0103 | 2.28   | 0.0109 | 2.28E-02 |
| 4.9   | 4.18 | 4.72   | 2.83   | 3.85   | 3.01   | 2.30E-02 |
| 4.9   | 4.18 | 4.72   | 2.83   | 3.85   | 3.01   | 2.30E-02 |
| 5.13  | 4.04 | 4.14   | 2.66   | 3.39   | 2.82   | 2.30E-02 |
| 5.13  | 4.04 | 4.14   | 2.66   | 3.39   | 2.82   | 2.30E-02 |
| 5.13  | 4.04 | 4.14   | 2.66   | 3.39   | 2.82   | 2.30E-02 |
| 0.011 | 2.15 | 0.0117 | 3.47   | 3.06   | 3.45   | 2.30E-02 |
| 5.29  | 4.38 | 4.76   | 0.0103 | 3.07   | 0.0109 | 2.30E-02 |
| 3.23  | 3.34 | 3.38   | 2.17   | 0.0105 | 0.0109 | 2.30E-02 |
| 3.23  | 3.34 | 3.38   | 2.17   | 0.0105 | 0.0109 | 2.30E-02 |
| 3.87  | 3.81 | 3.84   | 2.75   | 2.74   | 3.46   | 2.31E-02 |
| 3.87  | 3.81 | 3.84   | 2.75   | 2.74   | 3.46   | 2.31E-02 |
| 5.19  | 4.34 | 3.76   | 0.0103 | 2.69   | 0.0109 | 2.32E-02 |
| 5.19  | 4.34 | 3.76   | 0.0103 | 2.69   | 0.0109 | 2.32E-02 |
| 5.19  | 4.34 | 3.76   | 0.0103 | 2.69   | 0.0109 | 2.32E-02 |
| 4.61  | 4.85 | 5.28   | 0.0103 | 3.18   | 0.0109 | 2.32E-02 |
| 4.61  | 4.85 | 5.28   | 0.0103 | 3.18   | 0.0109 | 2.32E-02 |
| 4.34  | 4.5  | 4.53   | 0.0103 | 0.0105 | 2.92   | 2.32E-02 |
| 3.57  | 4.16 | 4.25   | 2.56   | 0.0105 | 0.0109 | 2.33E-02 |
| 3.57  | 4.16 | 4.25   | 2.56   | 0.0105 | 0.0109 | 2.33E-02 |
| 3.52  | 3.66 | 3.21   | 2.36   | 2.43   | 3      | 2.33E-02 |
| 0.011 | 2.22 | 0.0117 | 2.98   | 3.85   | 4.01   | 2.34E-02 |
| 0.011 | 2.22 | 0.0117 | 2.98   | 3.85   | 4.01   | 2.34E-02 |
| 3.49  | 4.38 | 4.1    | 0.0103 | 0.0105 | 2.53   | 2.34E-02 |
| 3.49  | 4.38 | 4.1    | 0.0103 | 0.0105 | 2.53   | 2.34E-02 |
| 5.69  | 4.73 | 5.05   | 4.2    | 2.91   | 3.08   | 2.34E-02 |
| 5.69  | 4.73 | 5.05   | 4.2    | 2.91   | 3.08   | 2.34E-02 |
| 3.57  | 4.68 | 4.28   | 2.61   | 0.0105 | 0.0109 | 2.35E-02 |
| 3.94  | 2.98 | 3.69   | 0.0103 | 2.2    | 0.0109 | 2.35E-02 |
| 3.94  | 2.98 | 3.69   | 0.0103 | 2.2    | 0.0109 | 2.35E-02 |
| 3.89  | 3.17 | 3.69   | 0.0103 | 2.29   | 0.0109 | 2.35E-02 |
| 5.35  | 5.11 | 4.44   | 3.72   | 3.11   | 4.01   | 2.36E-02 |

|       |       |        |        |        |        |          |
|-------|-------|--------|--------|--------|--------|----------|
| 5.35  | 5.11  | 4.44   | 3.72   | 3.11   | 4.01   | 2.36E-02 |
| 5.35  | 5.11  | 4.44   | 3.72   | 3.11   | 4.01   | 2.36E-02 |
| 5.35  | 5.11  | 4.44   | 3.72   | 3.11   | 4.01   | 2.36E-02 |
| 3.95  | 4.27  | 4.34   | 2.74   | 0.0105 | 0.0109 | 2.36E-02 |
| 3.95  | 4.27  | 4.34   | 2.74   | 0.0105 | 0.0109 | 2.36E-02 |
| 5.35  | 5.39  | 5.35   | 2.44   | 3.25   | 0.0109 | 2.36E-02 |
| 5.35  | 5.39  | 5.35   | 2.44   | 3.25   | 0.0109 | 2.36E-02 |
| 3.57  | 4.23  | 3.85   | 2.51   | 0.0105 | 0.0109 | 2.37E-02 |
| 3.57  | 4.23  | 3.85   | 2.51   | 0.0105 | 0.0109 | 2.37E-02 |
| 3.57  | 4.23  | 3.85   | 2.51   | 0.0105 | 0.0109 | 2.37E-02 |
| 3.77  | 3.13  | 4.44   | 2.25   | 2.48   | 2.49   | 2.37E-02 |
| 4.1   | 5.08  | 4.99   | 3.22   | 3.8    | 3.1    | 2.38E-02 |
| 4.1   | 5.08  | 4.99   | 3.22   | 3.8    | 3.1    | 2.38E-02 |
| 3.76  | 4.09  | 4.24   | 3.11   | 3.47   | 2.7    | 2.38E-02 |
| 3.76  | 4.09  | 4.24   | 3.11   | 3.47   | 2.7    | 2.38E-02 |
| 2.99  | 3.23  | 3.87   | 0.0103 | 2.11   | 0.0109 | 2.38E-02 |
| 4.26  | 3.33  | 3.92   | 0.0103 | 2.43   | 0.0109 | 2.38E-02 |
| 3.8   | 3.08  | 3.56   | 0.0103 | 2.23   | 0.0109 | 2.39E-02 |
| 4.51  | 3.85  | 4.25   | 0.0103 | 2.73   | 0.0109 | 2.39E-02 |
| 4.51  | 3.85  | 4.25   | 0.0103 | 2.73   | 0.0109 | 2.39E-02 |
| 4.34  | 3.73  | 4.01   | 2.62   | 0.0105 | 0.0109 | 2.39E-02 |
| 3.54  | 3.02  | 3.42   | 0.0103 | 2.16   | 0.0109 | 2.39E-02 |
| 3.54  | 3.02  | 3.42   | 0.0103 | 2.16   | 0.0109 | 2.39E-02 |
| 4.97  | 4.35  | 4.16   | 0.0103 | 2.9    | 0.0109 | 2.40E-02 |
| 4     | 3.11  | 4.56   | 2.32   | 0.0105 | 0.0109 | 2.40E-02 |
| 4     | 3.11  | 4.56   | 2.32   | 0.0105 | 0.0109 | 2.40E-02 |
| 3.9   | 4.36  | 4.92   | 2.8    | 0.0105 | 0.0109 | 2.40E-02 |
| 3.32  | 3.64  | 3.69   | 2.44   | 2.81   | 3.08   | 2.41E-02 |
| 3.32  | 3.64  | 3.69   | 2.44   | 2.81   | 3.08   | 2.41E-02 |
| 0.011 | 0.012 | 2.17   | 3.37   | 3.19   | 3.28   | 2.42E-02 |
| 4.84  | 4.67  | 4.16   | 2.97   | 0.0105 | 0.0109 | 2.42E-02 |
| 3.91  | 3.13  | 3.89   | 0.0103 | 2.32   | 0.0109 | 2.43E-02 |
| 3.78  | 3.75  | 3.47   | 0.0103 | 2.42   | 0.0109 | 2.43E-02 |
| 3.07  | 3.18  | 2.92   | 2.02   | 0.0105 | 0.0109 | 2.43E-02 |
| 4.4   | 4.31  | 4.45   | 2.91   | 0.0105 | 0.0109 | 2.43E-02 |
| 4.4   | 4.31  | 4.45   | 2.91   | 0.0105 | 0.0109 | 2.43E-02 |
| 3.47  | 3.04  | 3.77   | 2.47   | 2.73   | 2.08   | 2.44E-02 |
| 3.47  | 3.04  | 3.77   | 2.47   | 2.73   | 2.08   | 2.44E-02 |
| 3.22  | 3.62  | 3.51   | 2.27   | 0.0105 | 0.0109 | 2.44E-02 |
| 0.011 | 2.73  | 0.0117 | 4.61   | 3.83   | 4.18   | 2.44E-02 |
| 4.37  | 4.66  | 4.31   | 2.94   | 0.0105 | 0.0109 | 2.44E-02 |
| 3.62  | 3.9   | 4.59   | 3.07   | 3      | 2.56   | 2.44E-02 |
| 3.62  | 3.9   | 4.59   | 3.07   | 3      | 2.56   | 2.44E-02 |
| 4.78  | 4.27  | 3.34   | 2.51   | 0.0105 | 0.0109 | 2.45E-02 |
| 4.78  | 4.27  | 3.34   | 2.51   | 0.0105 | 0.0109 | 2.45E-02 |
| 4.24  | 4.58  | 3.05   | 0.0103 | 2.33   | 0.0109 | 2.45E-02 |
| 4.24  | 4.58  | 3.05   | 0.0103 | 2.33   | 0.0109 | 2.45E-02 |
| 2.87  | 3.9   | 4.15   | 0.0103 | 0.0105 | 2.19   | 2.45E-02 |
| 2.87  | 3.9   | 4.15   | 0.0103 | 0.0105 | 2.19   | 2.45E-02 |
| 4.27  | 3.75  | 4.07   | 2.65   | 0.0105 | 0.0109 | 2.45E-02 |
| 3.07  | 3.95  | 3.57   | 2.25   | 0.0105 | 0.0109 | 2.45E-02 |
| 4.53  | 4.34  | 4.28   | 0.0103 | 2.91   | 0.0109 | 2.46E-02 |
| 4.53  | 4.34  | 4.28   | 0.0103 | 2.91   | 0.0109 | 2.46E-02 |
| 4.53  | 4.34  | 4.28   | 0.0103 | 2.91   | 0.0109 | 2.46E-02 |
| 4.13  | 4.65  | 3.89   | 2.41   | 3.45   | 2.85   | 2.46E-02 |
| 4.13  | 4.65  | 3.89   | 2.41   | 3.45   | 2.85   | 2.46E-02 |
| 3.3   | 3.22  | 3      | 0.0103 | 2.1    | 0.0109 | 2.46E-02 |
| 3.3   | 3.22  | 3      | 0.0103 | 2.1    | 0.0109 | 2.46E-02 |

|      |       |        |        |        |        |          |
|------|-------|--------|--------|--------|--------|----------|
| 5.6  | 4.42  | 5.6    | 0.0103 | 3.08   | 2.12   | 2.46E-02 |
| 4.62 | 3.96  | 4.78   | 2.89   | 0.0105 | 0.0109 | 2.47E-02 |
| 3.8  | 3.42  | 3.11   | 2.85   | 2.24   | 2.24   | 2.47E-02 |
| 4.64 | 3.74  | 3.47   | 0.0103 | 0.0105 | 2.46   | 2.47E-02 |
| 4.64 | 3.74  | 3.47   | 0.0103 | 0.0105 | 2.46   | 2.47E-02 |
| 4.75 | 4.35  | 3.94   | 0.0103 | 2.83   | 0.0109 | 2.47E-02 |
| 4.75 | 4.35  | 3.94   | 0.0103 | 2.83   | 0.0109 | 2.47E-02 |
| 3.46 | 3.7   | 3.43   | 2.52   | 3.13   | 2.4    | 2.48E-02 |
| 3.46 | 3.7   | 3.43   | 2.52   | 3.13   | 2.4    | 2.48E-02 |
| 2.31 | 0.012 | 0.0117 | 3.2    | 3.65   | 3.71   | 2.48E-02 |
| 4.72 | 4.24  | 3.18   | 0.0103 | 2.42   | 0.0109 | 2.48E-02 |
| 4.72 | 4.24  | 3.18   | 0.0103 | 2.42   | 0.0109 | 2.48E-02 |
| 3.62 | 3.71  | 3.64   | 0.0103 | 2.44   | 0.0109 | 2.49E-02 |
| 3.62 | 3.71  | 3.64   | 0.0103 | 2.44   | 0.0109 | 2.49E-02 |
| 4.83 | 3.62  | 4.16   | 0.0103 | 2.65   | 0.0109 | 2.49E-02 |
| 4.28 | 3.6   | 3.93   | 3.37   | 3.03   | 3.04   | 2.50E-02 |
| 4.28 | 3.6   | 3.93   | 3.37   | 3.03   | 3.04   | 2.50E-02 |
| 4.28 | 3.6   | 3.93   | 3.37   | 3.03   | 3.04   | 2.50E-02 |
| 4.27 | 3.91  | 4.52   | 0.0103 | 2.22   | 2.33   | 2.50E-02 |
| 4.27 | 3.91  | 4.52   | 0.0103 | 2.22   | 2.33   | 2.50E-02 |
| 3.91 | 3.45  | 3.58   | 0.0103 | 2.41   | 0.0109 | 2.50E-02 |
| 5.08 | 5.39  | 4.83   | 0.0103 | 3.38   | 0.0109 | 2.50E-02 |
| 5.08 | 5.39  | 4.83   | 0.0103 | 3.38   | 0.0109 | 2.50E-02 |
| 5.08 | 5.39  | 4.83   | 0.0103 | 3.38   | 0.0109 | 2.50E-02 |
| 4.72 | 3.01  | 4.34   | 0.0103 | 2.32   | 0.0109 | 2.50E-02 |
| 4.72 | 3.01  | 4.34   | 0.0103 | 2.32   | 0.0109 | 2.50E-02 |
| 3.09 | 2.86  | 2.92   | 1.97   | 0.0105 | 0.0109 | 2.51E-02 |
| 3.09 | 2.86  | 2.92   | 1.97   | 0.0105 | 0.0109 | 2.51E-02 |
| 3.42 | 3     | 3.47   | 0.0103 | 0.0105 | 2.17   | 2.51E-02 |
| 3.88 | 4.06  | 3.99   | 2.26   | 3.39   | 2.82   | 2.51E-02 |
| 3.88 | 4.06  | 3.99   | 2.26   | 3.39   | 2.82   | 2.51E-02 |
| 3.67 | 3.5   | 3.9    | 2.45   | 0.0105 | 0.0109 | 2.51E-02 |
| 3.67 | 3.5   | 3.9    | 2.45   | 0.0105 | 0.0109 | 2.51E-02 |
| 3.67 | 3.5   | 3.9    | 2.45   | 0.0105 | 0.0109 | 2.51E-02 |
| 4.29 | 3.89  | 3.19   | 0.0103 | 2.39   | 0.0109 | 2.51E-02 |
| 4.29 | 3.89  | 3.19   | 0.0103 | 2.39   | 0.0109 | 2.51E-02 |
| 3.38 | 3.74  | 3.67   | 0.0103 | 2.39   | 0.0109 | 2.52E-02 |
| 3.38 | 3.74  | 3.67   | 0.0103 | 2.39   | 0.0109 | 2.52E-02 |
| 4.01 | 3.57  | 4.1    | 0.0103 | 2.57   | 0.0109 | 2.52E-02 |
| 4.01 | 3.57  | 4.1    | 0.0103 | 2.57   | 0.0109 | 2.52E-02 |
| 5.16 | 4.02  | 4.96   | 3.19   | 3.47   | 2.32   | 2.52E-02 |
| 3.29 | 3.8   | 3.19   | 0.0103 | 2.24   | 0.0109 | 2.52E-02 |
| 3.71 | 4.32  | 3.98   | 0.0103 | 2.64   | 0.0109 | 2.52E-02 |
| 3.96 | 3.66  | 2.98   | 0.0103 | 2.24   | 0.0109 | 2.52E-02 |
| 4.79 | 3.66  | 3.83   | 0.0103 | 0.0105 | 2.58   | 2.53E-02 |
| 3.4  | 3.48  | 3.62   | 2.34   | 0.0105 | 0.0109 | 2.53E-02 |
| 3.4  | 3.48  | 3.62   | 2.34   | 0.0105 | 0.0109 | 2.53E-02 |
| 3.64 | 3.82  | 3.54   | 3.38   | 3      | 3.19   | 2.53E-02 |
| 3.64 | 3.82  | 3.54   | 3.38   | 3      | 3.19   | 2.53E-02 |
| 4.88 | 4.65  | 4.34   | 3.66   | 3.67   | 2.65   | 2.54E-02 |
| 4.01 | 3.62  | 3.45   | 0.0103 | 2.44   | 0.0109 | 2.55E-02 |
| 4.19 | 4.55  | 5.53   | 3.52   | 2.92   | 2.33   | 2.55E-02 |
| 4.19 | 4.55  | 5.53   | 3.52   | 2.92   | 2.33   | 2.55E-02 |
| 3.97 | 3.62  | 3.55   | 0.0103 | 2.47   | 0.0109 | 2.55E-02 |
| 3.97 | 3.62  | 3.55   | 0.0103 | 2.47   | 0.0109 | 2.55E-02 |
| 4.04 | 4.08  | 4.03   | 0.0103 | 2.72   | 0.0109 | 2.55E-02 |
| 3.24 | 3.63  | 3.28   | 2.25   | 0.0105 | 0.0109 | 2.56E-02 |
| 4.28 | 4.48  | 4.28   | 2.8    | 3.82   | 2.78   | 2.56E-02 |

|       |       |        |        |        |        |          |
|-------|-------|--------|--------|--------|--------|----------|
| 4.28  | 4.48  | 4.28   | 2.8    | 3.82   | 2.78   | 2.56E-02 |
| 4.28  | 4.48  | 4.28   | 2.8    | 3.82   | 2.78   | 2.56E-02 |
| 5.08  | 4.77  | 5.01   | 3.06   | 4.33   | 3.42   | 2.57E-02 |
| 5.08  | 4.77  | 5.01   | 3.06   | 4.33   | 3.42   | 2.57E-02 |
| 4.275 | 3.695 | 2.82   | 0.0103 | 0.0105 | 2.15   | 2.57E-02 |
| 3.72  | 4.37  | 3.41   | 0.0103 | 0.0105 | 2.47   | 2.58E-02 |
| 4.76  | 4.85  | 4.87   | 2.39   | 4      | 2.25   | 2.58E-02 |
| 4.76  | 4.85  | 4.87   | 2.39   | 4      | 2.25   | 2.58E-02 |
| 3.63  | 4.63  | 4.03   | 2.65   | 0.0105 | 0.0109 | 2.58E-02 |
| 5.26  | 4.61  | 4.09   | 3.27   | 3.6    | 3.44   | 2.58E-02 |
| 5.26  | 4.61  | 4.09   | 3.27   | 3.6    | 3.44   | 2.58E-02 |
| 3.34  | 3.25  | 3.45   | 0.0103 | 2.25   | 0.0109 | 2.58E-02 |
| 3.34  | 3.25  | 3.45   | 0.0103 | 2.25   | 0.0109 | 2.58E-02 |
| 2.52  | 2.49  | 2.49   | 3.3    | 3.66   | 2.88   | 2.59E-02 |
| 3.9   | 2.75  | 3.7    | 0.0103 | 2.13   | 0.0109 | 2.59E-02 |
| 3.9   | 2.75  | 3.7    | 0.0103 | 2.13   | 0.0109 | 2.59E-02 |
| 4.72  | 5.05  | 4.32   | 2.6    | 3.91   | 2.71   | 2.59E-02 |
| 4.72  | 5.05  | 4.32   | 2.6    | 3.91   | 2.71   | 2.59E-02 |
| 3.79  | 3.91  | 3.43   | 3.23   | 2.81   | 2.55   | 2.59E-02 |
| 3.54  | 3.52  | 3.48   | 0.0103 | 2.37   | 0.0109 | 2.60E-02 |
| 3.54  | 3.52  | 3.48   | 0.0103 | 2.37   | 0.0109 | 2.60E-02 |
| 3.54  | 3.35  | 3.9    | 2.39   | 0.0105 | 0.0109 | 2.60E-02 |
| 3.54  | 3.35  | 3.9    | 2.39   | 0.0105 | 0.0109 | 2.60E-02 |
| 2.08  | 0.012 | 0.0117 | 3.69   | 2.8    | 3.23   | 2.60E-02 |
| 3.48  | 3.22  | 4.13   | 2.33   | 0.0105 | 0.0109 | 2.60E-02 |
| 3.48  | 3.22  | 4.13   | 2.33   | 0.0105 | 0.0109 | 2.60E-02 |
| 4.01  | 3.65  | 4.09   | 2.44   | 3.38   | 2.53   | 2.61E-02 |
| 4.01  | 3.65  | 4.09   | 2.44   | 3.38   | 2.53   | 2.61E-02 |
| 3.7   | 4.24  | 3.9    | 0.0103 | 2.17   | 2.12   | 2.61E-02 |
| 3.4   | 3.35  | 2.82   | 0.0103 | 2.1    | 0.0109 | 2.62E-02 |
| 4.91  | 4.14  | 4.98   | 0.0103 | 0.0105 | 3.08   | 2.62E-02 |
| 4.13  | 3.79  | 3.31   | 2.5    | 2.72   | 3.05   | 2.62E-02 |
| 3.61  | 2.96  | 3.4    | 0.0103 | 2.19   | 0.0109 | 2.62E-02 |
| 3.61  | 2.96  | 3.4    | 0.0103 | 2.19   | 0.0109 | 2.62E-02 |
| 3.61  | 2.96  | 3.4    | 0.0103 | 2.19   | 0.0109 | 2.62E-02 |
| 3.72  | 3.35  | 2.97   | 2.66   | 2.6    | 2.48   | 2.63E-02 |
| 3.72  | 3.35  | 2.97   | 2.66   | 2.6    | 2.48   | 2.63E-02 |
| 4.56  | 3.3   | 3.71   | 0.0103 | 2.42   | 0.0109 | 2.63E-02 |
| 4.56  | 3.3   | 3.71   | 0.0103 | 2.42   | 0.0109 | 2.63E-02 |
| 4.12  | 3.21  | 3.7    | 0.0103 | 2.39   | 0.0109 | 2.63E-02 |
| 4.12  | 3.21  | 3.7    | 0.0103 | 2.39   | 0.0109 | 2.63E-02 |
| 4.12  | 3.21  | 3.7    | 0.0103 | 2.39   | 0.0109 | 2.63E-02 |
| 4.12  | 3.21  | 3.7    | 0.0103 | 2.39   | 0.0109 | 2.63E-02 |
| 5.17  | 4.15  | 3.49   | 2.59   | 0.0105 | 0.0109 | 2.64E-02 |
| 5.17  | 4.15  | 3.49   | 2.59   | 0.0105 | 0.0109 | 2.64E-02 |
| 4.58  | 5.38  | 4.15   | 3.03   | 3.07   | 3.69   | 2.64E-02 |
| 4.58  | 5.38  | 4.15   | 3.03   | 3.07   | 3.69   | 2.64E-02 |
| 4.58  | 5.38  | 4.15   | 3.03   | 3.07   | 3.69   | 2.64E-02 |
| 2.88  | 3.97  | 3.4    | 2.16   | 0.0105 | 0.0109 | 2.64E-02 |
| 2.88  | 3.97  | 3.4    | 2.16   | 0.0105 | 0.0109 | 2.64E-02 |
| 2.88  | 3.97  | 3.4    | 2.16   | 0.0105 | 0.0109 | 2.64E-02 |
| 3.88  | 4.42  | 3.25   | 0.0103 | 2.45   | 0.0109 | 2.64E-02 |
| 2.89  | 2.93  | 3.89   | 0.0103 | 2.02   | 0.0109 | 2.65E-02 |
| 3.49  | 4.35  | 4.19   | 2.63   | 0.0105 | 0.0109 | 2.66E-02 |
| 3.49  | 4.35  | 4.19   | 2.63   | 0.0105 | 0.0109 | 2.66E-02 |
| 3.66  | 4     | 4.49   | 2.59   | 3.28   | 2.2    | 2.67E-02 |
| 3.66  | 4     | 4.49   | 2.59   | 3.28   | 2.2    | 2.67E-02 |
| 3.11  | 3.81  | 3.21   | 2.22   | 0.0105 | 0.0109 | 2.67E-02 |

|      |       |        |        |        |        |          |
|------|-------|--------|--------|--------|--------|----------|
| 3.63 | 3.04  | 3.08   | 0.0103 | 2.15   | 0.0109 | 2.67E-02 |
| 3.13 | 3.31  | 2.86   | 2.43   | 2.71   | 2.26   | 2.68E-02 |
| 3.55 | 4.06  | 3.91   | 0.0103 | 2.58   | 0.0109 | 2.68E-02 |
| 3.55 | 4.06  | 3.91   | 0.0103 | 2.58   | 0.0109 | 2.68E-02 |
| 4.69 | 4.19  | 4.44   | 2.62   | 2.23   | 0.0109 | 2.69E-02 |
| 4.69 | 4.19  | 4.44   | 2.62   | 2.23   | 0.0109 | 2.69E-02 |
| 2.94 | 2.97  | 3.33   | 0.0103 | 2.07   | 0.0109 | 2.69E-02 |
| 2.94 | 2.97  | 3.33   | 0.0103 | 2.07   | 0.0109 | 2.69E-02 |
| 4.07 | 3.95  | 4.12   | 0.0103 | 2.75   | 0.0109 | 2.69E-02 |
| 3.27 | 3.84  | 3.1    | 0.0103 | 2.24   | 0.0109 | 2.69E-02 |
| 2.45 | 0.012 | 0.0117 | 3.96   | 3.59   | 3.41   | 2.69E-02 |
| 3.74 | 4.21  | 4.59   | 0.0103 | 2.77   | 0.0109 | 2.69E-02 |
| 4.4  | 4.12  | 4.25   | 0.0103 | 2.89   | 0.0109 | 2.70E-02 |
| 5.41 | 4.37  | 4.56   | 3.45   | 3.61   | 2.53   | 2.70E-02 |
| 5.15 | 4.73  | 4.71   | 0.0103 | 3.29   | 0.0109 | 2.70E-02 |
| 4.3  | 3.82  | 4.59   | 3.58   | 3.23   | 3.38   | 2.70E-02 |
| 4.3  | 3.82  | 4.59   | 3.58   | 3.23   | 3.38   | 2.70E-02 |
| 4.26 | 4.56  | 3.6    | 0.0103 | 0.0105 | 2.72   | 2.71E-02 |
| 4.53 | 4.4   | 4.78   | 0.0103 | 3.1    | 0.0109 | 2.71E-02 |
| 4.87 | 4.74  | 4.63   | 0.0103 | 3.23   | 0.0109 | 2.71E-02 |
| 3.09 | 3.74  | 3.69   | 2.74   | 2.88   | 2.54   | 2.71E-02 |
| 3.09 | 3.74  | 3.69   | 2.74   | 2.88   | 2.54   | 2.71E-02 |
| 3.9  | 3.89  | 4.01   | 3.45   | 3.14   | 2.58   | 2.72E-02 |
| 3.72 | 3.11  | 3.81   | 0.0103 | 2.35   | 0.0109 | 2.72E-02 |
| 3.72 | 3.11  | 3.81   | 0.0103 | 2.35   | 0.0109 | 2.72E-02 |
| 3.29 | 2.72  | 3.32   | 2.06   | 0.0105 | 0.0109 | 2.73E-02 |
| 3.29 | 2.72  | 3.32   | 2.06   | 0.0105 | 0.0109 | 2.73E-02 |
| 3.58 | 4.7   | 3.81   | 0.0103 | 2.6    | 0.0109 | 2.73E-02 |
| 3.58 | 4.7   | 3.81   | 0.0103 | 2.6    | 0.0109 | 2.73E-02 |
| 3.42 | 3.53  | 3.47   | 0.0103 | 2.37   | 0.0109 | 2.73E-02 |
| 4.24 | 4.4   | 3.88   | 3.4    | 3.57   | 3.72   | 2.73E-02 |
| 4.24 | 4.4   | 3.88   | 3.4    | 3.57   | 3.72   | 2.73E-02 |
| 4.24 | 4.4   | 3.88   | 3.4    | 3.57   | 3.72   | 2.73E-02 |
| 5.37 | 3.82  | 4.6    | 2.34   | 2.75   | 3.31   | 2.73E-02 |
| 5.37 | 3.82  | 4.6    | 2.34   | 2.75   | 3.31   | 2.73E-02 |
| 5.37 | 3.82  | 4.6    | 2.34   | 2.75   | 3.31   | 2.73E-02 |
| 4.87 | 5.01  | 5.13   | 0.0103 | 2.49   | 3.02   | 2.73E-02 |
| 4.87 | 5.01  | 5.13   | 0.0103 | 2.49   | 3.02   | 2.73E-02 |
| 5.4  | 5.32  | 5.28   | 0.0103 | 3.41   | 2.34   | 2.73E-02 |
| 4.21 | 5.18  | 5.15   | 0.0103 | 2.85   | 2.27   | 2.73E-02 |
| 4.21 | 5.18  | 5.15   | 0.0103 | 2.85   | 2.27   | 2.73E-02 |
| 3.76 | 3.47  | 3.01   | 0.0103 | 2.26   | 0.0109 | 2.74E-02 |
| 3.76 | 3.47  | 3.01   | 0.0103 | 2.26   | 0.0109 | 2.74E-02 |
| 4.62 | 3.92  | 4.35   | 0.0103 | 2.89   | 0.0109 | 2.75E-02 |
| 3.81 | 3.78  | 3.68   | 2.57   | 0.0105 | 0.0109 | 2.76E-02 |
| 3.15 | 3.09  | 3.09   | 0.0103 | 0.0105 | 2.13   | 2.76E-02 |
| 3.23 | 2.67  | 3.17   | 0.0103 | 2.02   | 0.0109 | 2.78E-02 |
| 4.64 | 4.21  | 4.52   | 3.37   | 3.56   | 2.32   | 2.78E-02 |
| 4.64 | 4.21  | 4.52   | 3.37   | 3.56   | 2.32   | 2.78E-02 |
| 2.99 | 3.74  | 3.26   | 0.0103 | 2.21   | 0.0109 | 2.78E-02 |
| 4.21 | 4.77  | 5.08   | 2.35   | 0.0105 | 2.72   | 2.78E-02 |
| 5.35 | 5.33  | 3.88   | 2.32   | 3.38   | 3.01   | 2.79E-02 |
| 5.35 | 5.33  | 3.88   | 2.32   | 3.38   | 3.01   | 2.79E-02 |
| 5.07 | 5.26  | 5.14   | 3.17   | 2.52   | 0.0109 | 2.79E-02 |
| 3.4  | 4.4   | 3.72   | 0.0103 | 2.52   | 0.0109 | 2.79E-02 |
| 3.4  | 4.4   | 3.72   | 0.0103 | 2.52   | 0.0109 | 2.79E-02 |
| 2.96 | 3.34  | 3.33   | 2.18   | 0.0105 | 0.0109 | 2.79E-02 |
| 3.85 | 4.03  | 2.9    | 2.29   | 0.0105 | 0.0109 | 2.79E-02 |

|       |       |        |        |        |        |          |
|-------|-------|--------|--------|--------|--------|----------|
| 3.85  | 4.03  | 2.9    | 2.29   | 0.0105 | 0.0109 | 2.79E-02 |
| 4.29  | 3.72  | 3.38   | 2.48   | 3.06   | 2.3    | 2.80E-02 |
| 4.29  | 3.72  | 3.38   | 2.48   | 3.06   | 2.3    | 2.80E-02 |
| 5.03  | 3.61  | 4.77   | 2.77   | 3.18   | 2.87   | 2.80E-02 |
| 5.03  | 3.61  | 4.77   | 2.77   | 3.18   | 2.87   | 2.80E-02 |
| 3.15  | 3.44  | 3.83   | 0.0103 | 2.33   | 0.0109 | 2.80E-02 |
| 3.15  | 3.44  | 3.83   | 0.0103 | 2.33   | 0.0109 | 2.80E-02 |
| 4.23  | 3.15  | 3.15   | 0.0103 | 2.22   | 0.0109 | 2.80E-02 |
| 4.23  | 3.15  | 3.15   | 0.0103 | 2.22   | 0.0109 | 2.80E-02 |
| 4.54  | 4.69  | 4.22   | 2.11   | 2.78   | 0.0109 | 2.80E-02 |
| 4.55  | 4.16  | 4.67   | 2.92   | 3.64   | 2.12   | 2.81E-02 |
| 5.05  | 4.48  | 5.21   | 0.0103 | 3.33   | 0.0109 | 2.82E-02 |
| 5.05  | 4.48  | 5.21   | 0.0103 | 3.33   | 0.0109 | 2.82E-02 |
| 5.05  | 4.48  | 5.21   | 0.0103 | 3.33   | 0.0109 | 2.82E-02 |
| 3.75  | 2.81  | 3.97   | 0.0103 | 2.23   | 0.0109 | 2.83E-02 |
| 4.36  | 4.16  | 3.56   | 2.7    | 0.0105 | 0.0109 | 2.83E-02 |
| 4.36  | 4.16  | 3.56   | 2.7    | 0.0105 | 0.0109 | 2.83E-02 |
| 4.36  | 4.16  | 3.56   | 2.7    | 0.0105 | 0.0109 | 2.83E-02 |
| 0.011 | 0.012 | 2.78   | 3.71   | 4.18   | 4.5    | 2.83E-02 |
| 3.41  | 3.12  | 3.72   | 2.85   | 2.61   | 2.86   | 2.83E-02 |
| 3.41  | 3.12  | 3.72   | 2.85   | 2.61   | 2.86   | 2.83E-02 |
| 3.01  | 2.9   | 3.18   | 2.08   | 0.0105 | 0.0109 | 2.85E-02 |
| 4.12  | 4.83  | 3.8    | 3.12   | 3.14   | 2.26   | 2.85E-02 |
| 4.12  | 4.83  | 3.8    | 3.12   | 3.14   | 2.26   | 2.85E-02 |
| 4.26  | 2.95  | 4.33   | 0.0103 | 0.0105 | 2.38   | 2.85E-02 |
| 4.26  | 2.95  | 4.33   | 0.0103 | 0.0105 | 2.38   | 2.85E-02 |
| 2.79  | 3.09  | 3.17   | 0.0103 | 2.06   | 0.0109 | 2.85E-02 |
| 2.79  | 3.09  | 3.17   | 0.0103 | 2.06   | 0.0109 | 2.85E-02 |
| 3.85  | 3.93  | 4.65   | 2.78   | 0.0105 | 0.0109 | 2.85E-02 |
| 3.85  | 3.93  | 4.65   | 2.78   | 0.0105 | 0.0109 | 2.85E-02 |
| 3.85  | 3.93  | 4.65   | 2.78   | 0.0105 | 0.0109 | 2.85E-02 |
| 3.24  | 4.62  | 3.36   | 2.31   | 0.0105 | 0.0109 | 2.86E-02 |
| 4.73  | 5.68  | 4.6    | 2.41   | 3.97   | 2.84   | 2.86E-02 |
| 4.73  | 5.68  | 4.6    | 2.41   | 3.97   | 2.84   | 2.86E-02 |
| 5.02  | 5.11  | 3.75   | 2.76   | 3.36   | 3.02   | 2.87E-02 |
| 5.02  | 5.11  | 3.75   | 2.76   | 3.36   | 3.02   | 2.87E-02 |
| 0.011 | 0.012 | 2.21   | 2.99   | 3.24   | 3.51   | 2.87E-02 |
| 3.46  | 3.23  | 4.03   | 0.0103 | 2.39   | 0.0109 | 2.87E-02 |
| 3.46  | 3.23  | 4.03   | 0.0103 | 2.39   | 0.0109 | 2.87E-02 |
| 3.46  | 3.23  | 4.03   | 0.0103 | 2.39   | 0.0109 | 2.87E-02 |
| 3.43  | 3.32  | 3.36   | 0.0103 | 2.33   | 0.0109 | 2.88E-02 |
| 0.011 | 2.03  | 0.0117 | 2.77   | 2.94   | 3.79   | 2.88E-02 |
| 3.84  | 5.09  | 5.55   | 3.06   | 0.0105 | 0.0109 | 2.88E-02 |
| 3.84  | 5.09  | 5.55   | 3.06   | 0.0105 | 0.0109 | 2.88E-02 |
| 3.84  | 5.09  | 5.55   | 3.06   | 0.0105 | 0.0109 | 2.88E-02 |
| 3.84  | 5.09  | 5.55   | 3.06   | 0.0105 | 0.0109 | 2.88E-02 |
| 3.74  | 3.51  | 3.57   | 0.0103 | 2.49   | 0.0109 | 2.88E-02 |
| 3.74  | 3.51  | 3.57   | 0.0103 | 2.49   | 0.0109 | 2.88E-02 |
| 3.71  | 3.58  | 2.98   | 2.47   | 2.81   | 2.46   | 2.89E-02 |
| 2.19  | 0.012 | 0.0117 | 3.1    | 3.44   | 3.05   | 2.89E-02 |
| 4.17  | 3     | 3.41   | 0.0103 | 0.0105 | 2.27   | 2.89E-02 |
| 4.62  | 3.96  | 4.78   | 0.0103 | 2.36   | 2.51   | 2.90E-02 |
| 2.65  | 3.82  | 3.54   | 0.0103 | 2.12   | 0.0109 | 2.90E-02 |
| 3.44  | 3.92  | 3.09   | 0.0103 | 2.33   | 0.0109 | 2.90E-02 |
| 3.04  | 2.77  | 3      | 3.85   | 4.19   | 3.35   | 2.90E-02 |
| 3.04  | 2.77  | 3      | 3.85   | 4.19   | 3.35   | 2.90E-02 |
| 3.92  | 3.82  | 3.54   | 0.0103 | 2.59   | 0.0109 | 2.91E-02 |
| 5.7   | 4.55  | 5.55   | 4.22   | 3.96   | 3.85   | 2.91E-02 |



|       |       |        |        |        |        |          |
|-------|-------|--------|--------|--------|--------|----------|
| 5.7   | 4.55  | 5.55   | 4.22   | 3.96   | 3.85   | 2.91E-02 |
| 5.7   | 4.55  | 5.55   | 4.22   | 3.96   | 3.85   | 2.91E-02 |
| 3.44  | 3.6   | 2.9    | 0.0103 | 2.23   | 0.0109 | 2.91E-02 |
| 3.92  | 2.97  | 3.95   | 2.36   | 0.0105 | 0.0109 | 2.91E-02 |
| 3.04  | 2.65  | 3.67   | 0.0103 | 2.02   | 0.0109 | 2.91E-02 |
| 2.63  | 2.86  | 2.54   | 3.51   | 3.52   | 2.99   | 2.91E-02 |
| 2.63  | 2.86  | 2.54   | 3.51   | 3.52   | 2.99   | 2.91E-02 |
| 3.35  | 2.7   | 2.98   | 2.38   | 2.39   | 2.38   | 2.91E-02 |
| 4.81  | 4.42  | 4.62   | 3.3    | 3.87   | 2.47   | 2.92E-02 |
| 5.15  | 5.02  | 5.4    | 4.26   | 4.02   | 2.87   | 2.93E-02 |
| 5.15  | 5.02  | 5.4    | 4.26   | 4.02   | 2.87   | 2.93E-02 |
| 3.79  | 3.91  | 3.43   | 0.0103 | 0.0105 | 2.55   | 2.93E-02 |
| 4.15  | 4.13  | 4.07   | 0.0103 | 2.86   | 0.0109 | 2.93E-02 |
| 4.15  | 4.13  | 4.07   | 0.0103 | 2.86   | 0.0109 | 2.93E-02 |
| 3.2   | 3.37  | 3.33   | 0.0103 | 2.29   | 0.0109 | 2.93E-02 |
| 3.2   | 3.37  | 3.33   | 0.0103 | 2.29   | 0.0109 | 2.93E-02 |
| 3.46  | 3.76  | 3.47   | 2.06   | 3.07   | 2.05   | 2.94E-02 |
| 4.21  | 4.28  | 3.59   | 0.0103 | 2.74   | 0.0109 | 2.94E-02 |
| 5.19  | 4.65  | 5.05   | 2.05   | 3.98   | 3.08   | 2.94E-02 |
| 3.76  | 3.23  | 3.13   | 2.29   | 0.0105 | 0.0109 | 2.94E-02 |
| 3.76  | 3.23  | 3.13   | 2.29   | 0.0105 | 0.0109 | 2.94E-02 |
| 3.62  | 2.92  | 3.22   | 0.0103 | 2.2    | 0.0109 | 2.94E-02 |
| 4.89  | 5.08  | 3.19   | 0.0103 | 2.62   | 0.0109 | 2.95E-02 |
| 3.33  | 3.09  | 3.03   | 2.28   | 2.83   | 2.51   | 2.95E-02 |
| 4.23  | 3.55  | 3.49   | 0.0103 | 2.54   | 0.0109 | 2.95E-02 |
| 3.81  | 3.53  | 3.12   | 0.0103 | 2.37   | 0.0109 | 2.95E-02 |
| 3.84  | 3.5   | 2.64   | 2.12   | 0.0105 | 0.0109 | 2.96E-02 |
| 2.48  | 0.012 | 0.0117 | 3.17   | 4.08   | 5.06   | 2.96E-02 |
| 4.09  | 3.72  | 3.41   | 2.97   | 3.16   | 2.66   | 2.96E-02 |
| 4.09  | 3.72  | 3.41   | 2.97   | 3.16   | 2.66   | 2.96E-02 |
| 3.36  | 3.04  | 4      | 2.3    | 0.0105 | 0.0109 | 2.97E-02 |
| 3.36  | 3.04  | 4      | 2.3    | 0.0105 | 0.0109 | 2.97E-02 |
| 3.65  | 4.14  | 4.29   | 0.0103 | 2.37   | 2.08   | 2.97E-02 |
| 3.81  | 3.66  | 3.87   | 2.09   | 0.0105 | 2.18   | 2.97E-02 |
| 3.31  | 3.23  | 3.08   | 0.0103 | 2.23   | 0.0109 | 2.98E-02 |
| 3.31  | 3.23  | 3.08   | 0.0103 | 2.23   | 0.0109 | 2.98E-02 |
| 3.04  | 3.09  | 2.85   | 2.08   | 0.0105 | 0.0109 | 2.98E-02 |
| 3.04  | 3.09  | 2.85   | 2.08   | 0.0105 | 0.0109 | 2.98E-02 |
| 4.31  | 4.36  | 4.64   | 3.28   | 4.05   | 3.4    | 2.98E-02 |
| 4.31  | 4.36  | 4.64   | 3.28   | 4.05   | 3.4    | 2.98E-02 |
| 4.4   | 4.1   | 4.4    | 0.0103 | 2.99   | 0.0109 | 2.99E-02 |
| 4.4   | 4.1   | 4.4    | 0.0103 | 2.99   | 0.0109 | 2.99E-02 |
| 4.4   | 4.1   | 4.4    | 0.0103 | 2.99   | 0.0109 | 2.99E-02 |
| 4.16  | 3.69  | 5.06   | 0.0103 | 2.29   | 2.21   | 2.99E-02 |
| 3.05  | 3.21  | 3.54   | 2.25   | 0.0105 | 0.0109 | 2.99E-02 |
| 2.41  | 0.012 | 0.0117 | 3.55   | 3.16   | 3.96   | 2.99E-02 |
| 0.011 | 0.012 | 2.35   | 3.04   | 3.91   | 3.53   | 3.00E-02 |
| 3.61  | 3.29  | 3.71   | 0.0103 | 2.45   | 0.0109 | 3.00E-02 |
| 3.94  | 3.55  | 3.62   | 2.57   | 0.0105 | 0.0109 | 3.00E-02 |
| 3.31  | 3.74  | 2.92   | 0.0103 | 0.0105 | 2.24   | 3.01E-02 |
| 4.75  | 4.18  | 5.12   | 3.78   | 3.36   | 2.63   | 3.01E-02 |
| 3.5   | 3.21  | 3.71   | 0.0103 | 2.4    | 0.0109 | 3.01E-02 |
| 3.48  | 4.38  | 4.21   | 2.72   | 0.0105 | 0.0109 | 3.01E-02 |
| 3.48  | 4.38  | 4.21   | 2.72   | 0.0105 | 0.0109 | 3.01E-02 |
| 4.76  | 4.37  | 3.72   | 0.0103 | 2.89   | 0.0109 | 3.02E-02 |
| 4.76  | 4.37  | 3.72   | 0.0103 | 2.89   | 0.0109 | 3.02E-02 |
| 3.2   | 2.84  | 2.99   | 2.09   | 0.0105 | 0.0109 | 3.02E-02 |
| 3.2   | 2.84  | 2.99   | 2.09   | 0.0105 | 0.0109 | 3.02E-02 |

|       |       |        |        |        |        |          |
|-------|-------|--------|--------|--------|--------|----------|
| 4.4   | 4.1   | 4.4    | 3      | 0.0105 | 0.0109 | 3.03E-02 |
| 5.08  | 4.77  | 5.01   | 2.91   | 4.33   | 3.42   | 3.03E-02 |
| 5.08  | 4.77  | 5.01   | 2.91   | 4.33   | 3.42   | 3.03E-02 |
| 5.08  | 4.77  | 5.01   | 2.91   | 4.33   | 3.42   | 3.03E-02 |
| 5.08  | 4.77  | 5.01   | 2.91   | 4.33   | 3.42   | 3.03E-02 |
| 5.08  | 4.77  | 5.01   | 2.91   | 4.33   | 3.42   | 3.03E-02 |
| 5.08  | 4.77  | 5.01   | 2.91   | 4.33   | 3.42   | 3.03E-02 |
| 5.08  | 4.77  | 5.01   | 2.91   | 4.33   | 3.42   | 3.03E-02 |
| 5.08  | 4.77  | 5.01   | 2.91   | 4.33   | 3.42   | 3.03E-02 |
| 5.45  | 4.66  | 4.95   | 2.34   | 4.14   | 2.68   | 3.03E-02 |
| 5.45  | 4.66  | 4.95   | 2.34   | 4.14   | 2.68   | 3.03E-02 |
| 3.58  | 3.18  | 3.33   | 2.98   | 2.48   | 2.79   | 3.03E-02 |
| 3.58  | 3.18  | 3.33   | 2.98   | 2.48   | 2.79   | 3.03E-02 |
| 4.67  | 3.57  | 4.33   | 2.81   | 0.0105 | 0.0109 | 3.04E-02 |
| 4.67  | 3.57  | 4.33   | 2.81   | 0.0105 | 0.0109 | 3.04E-02 |
| 3.26  | 3.68  | 4.09   | 2.5    | 0.0105 | 0.0109 | 3.04E-02 |
| 3.83  | 3.57  | 3.59   | 2.56   | 0.0105 | 0.0109 | 3.04E-02 |
| 3.83  | 3.57  | 3.59   | 2.56   | 0.0105 | 0.0109 | 3.04E-02 |
| 4.3   | 3.49  | 3.93   | 0.0103 | 2.67   | 0.0109 | 3.04E-02 |
| 4.36  | 4     | 3.86   | 3.45   | 2.53   | 3.18   | 3.05E-02 |
| 4.36  | 4     | 3.86   | 3.45   | 2.53   | 3.18   | 3.05E-02 |
| 3.74  | 3.8   | 4.19   | 2.72   | 0.0105 | 0.0109 | 3.06E-02 |
| 3.74  | 3.8   | 4.19   | 2.72   | 0.0105 | 0.0109 | 3.06E-02 |
| 3.01  | 3.06  | 3.29   | 0.0103 | 2.18   | 0.0109 | 3.06E-02 |
| 3.01  | 3.06  | 3.29   | 0.0103 | 2.18   | 0.0109 | 3.06E-02 |
| 0.011 | 0.012 | 2.26   | 3.14   | 3.45   | 3.13   | 3.06E-02 |
| 3.38  | 3.95  | 3.07   | 0.0103 | 2.34   | 0.0109 | 3.06E-02 |
| 4.33  | 3.64  | 3.2    | 0.0103 | 2.47   | 0.0109 | 3.06E-02 |
| 3.47  | 3.06  | 3.34   | 0.0103 | 2.29   | 0.0109 | 3.06E-02 |
| 3.47  | 3.06  | 3.34   | 0.0103 | 2.29   | 0.0109 | 3.06E-02 |
| 3.65  | 3.18  | 3.32   | 0.0103 | 2.35   | 0.0109 | 3.07E-02 |
| 3.65  | 3.18  | 3.32   | 0.0103 | 2.35   | 0.0109 | 3.07E-02 |
| 3.88  | 3.19  | 3.09   | 0.0103 | 0.0105 | 2.29   | 3.07E-02 |
| 3.83  | 3.54  | 4.39   | 3.27   | 2.61   | 2.7    | 3.07E-02 |
| 3.83  | 3.54  | 4.39   | 3.27   | 2.61   | 2.7    | 3.07E-02 |
| 2.9   | 3.38  | 3.19   | 0.0103 | 0.0105 | 2.19   | 3.08E-02 |
| 4.37  | 4.05  | 4.65   | 3.04   | 3.8    | 2.78   | 3.08E-02 |
| 3.46  | 3.41  | 2.96   | 2.68   | 2.84   | 2.56   | 3.08E-02 |
| 3.55  | 2.92  | 3.45   | 0.0103 | 2.27   | 0.0109 | 3.08E-02 |
| 3.4   | 3.37  | 3.62   | 0.0103 | 2.43   | 0.0109 | 3.09E-02 |
| 3.4   | 3.37  | 3.62   | 0.0103 | 2.43   | 0.0109 | 3.09E-02 |
| 3.4   | 3.37  | 3.62   | 0.0103 | 2.43   | 0.0109 | 3.09E-02 |
| 4.17  | 4.09  | 4.39   | 0.0103 | 2.96   | 0.0109 | 3.09E-02 |
| 0.011 | 2.47  | 0.0117 | 3.29   | 3.51   | 3.92   | 3.09E-02 |
| 0.011 | 2.47  | 0.0117 | 3.29   | 3.51   | 3.92   | 3.09E-02 |
| 5.15  | 4.68  | 4.48   | 0.0103 | 3.32   | 0.0109 | 3.10E-02 |
| 5.15  | 4.68  | 4.48   | 0.0103 | 3.32   | 0.0109 | 3.10E-02 |
| 4.56  | 4.73  | 3.69   | 0.0103 | 2.16   | 2.52   | 3.10E-02 |
| 4.32  | 4.1   | 4.24   | 2.79   | 3.79   | 2.85   | 3.10E-02 |
| 4.32  | 4.1   | 4.24   | 2.79   | 3.79   | 2.85   | 3.10E-02 |
| 4.37  | 4.05  | 4.65   | 3.04   | 3.8    | 2.77   | 3.11E-02 |
| 3.12  | 3.14  | 3.06   | 0.0103 | 2.19   | 0.0109 | 3.11E-02 |
| 5.26  | 4.83  | 4.55   | 3.79   | 4.22   | 3.27   | 3.11E-02 |
| 5.26  | 4.83  | 4.55   | 3.79   | 4.22   | 3.27   | 3.11E-02 |
| 3.4   | 3.74  | 4.29   | 2.6    | 0.0105 | 0.0109 | 3.11E-02 |
| 3.48  | 2.9   | 3.16   | 0.0103 | 0.0105 | 2.2    | 3.11E-02 |
| 3.48  | 2.9   | 3.16   | 0.0103 | 0.0105 | 2.2    | 3.11E-02 |
| 4.2   | 3.74  | 4.53   | 2.87   | 0.0105 | 0.0109 | 3.12E-02 |

|      |       |        |        |        |        |          |
|------|-------|--------|--------|--------|--------|----------|
| 4.2  | 3.74  | 4.53   | 2.87   | 0.0105 | 0.0109 | 3.12E-02 |
| 4.59 | 5.42  | 4.7    | 3.88   | 3.38   | 2.34   | 3.12E-02 |
| 4.59 | 5.42  | 4.7    | 3.88   | 3.38   | 2.34   | 3.12E-02 |
| 3.71 | 3.86  | 3.47   | 2.58   | 0.0105 | 0.0109 | 3.12E-02 |
| 3.48 | 2.81  | 3.87   | 2.25   | 0.0105 | 0.0109 | 3.13E-02 |
| 3.48 | 2.81  | 3.87   | 2.25   | 0.0105 | 0.0109 | 3.13E-02 |
| 3.08 | 3.08  | 4.24   | 2.23   | 0.0105 | 0.0109 | 3.13E-02 |
| 5.31 | 5.85  | 4.59   | 0.0103 | 0.0105 | 3.58   | 3.13E-02 |
| 3.75 | 4.1   | 3.16   | 2.49   | 0.0105 | 0.0109 | 3.13E-02 |
| 4.33 | 5.43  | 4.42   | 0.0103 | 3.21   | 0.0109 | 3.14E-02 |
| 4.33 | 5.43  | 4.42   | 0.0103 | 3.21   | 0.0109 | 3.14E-02 |
| 3.32 | 3.45  | 3.38   | 0.0103 | 2.39   | 0.0109 | 3.14E-02 |
| 3.32 | 3.45  | 3.38   | 0.0103 | 2.39   | 0.0109 | 3.14E-02 |
| 4.38 | 3.67  | 4.19   | 0.0103 | 2.83   | 0.0109 | 3.14E-02 |
| 4.38 | 3.67  | 4.19   | 0.0103 | 2.83   | 0.0109 | 3.14E-02 |
| 3.76 | 4.36  | 4.37   | 2.32   | 3.51   | 2.74   | 3.15E-02 |
| 3.76 | 4.36  | 4.37   | 2.32   | 3.51   | 2.74   | 3.15E-02 |
| 2.19 | 0.012 | 0.0117 | 3.93   | 3.08   | 2.91   | 3.15E-02 |
| 3.72 | 3.11  | 3.19   | 2.31   | 0.0105 | 0.0109 | 3.15E-02 |
| 4.63 | 3.76  | 4.59   | 2.97   | 0.0105 | 0.0109 | 3.16E-02 |
| 4.63 | 3.76  | 4.59   | 2.97   | 0.0105 | 0.0109 | 3.16E-02 |
| 3.72 | 3.94  | 3.36   | 2.36   | 3.18   | 2.38   | 3.16E-02 |
| 3.27 | 2.68  | 3.81   | 0.0103 | 2.14   | 0.0109 | 3.16E-02 |
| 3.27 | 2.68  | 3.81   | 0.0103 | 2.14   | 0.0109 | 3.16E-02 |
| 3.05 | 2.72  | 3.9    | 0.0103 | 2.09   | 0.0109 | 3.16E-02 |
| 3.61 | 4.48  | 3.68   | 0.0103 | 2.68   | 0.0109 | 3.16E-02 |
| 3.61 | 4.48  | 3.68   | 0.0103 | 2.68   | 0.0109 | 3.16E-02 |
| 2.63 | 0.012 | 0.0117 | 4.31   | 3.45   | 3.73   | 3.16E-02 |
| 3.54 | 3.53  | 3.3    | 2.44   | 0.0105 | 0.0109 | 3.17E-02 |
| 3.54 | 3.53  | 3.3    | 2.44   | 0.0105 | 0.0109 | 3.17E-02 |
| 4.15 | 4.19  | 3.56   | 0.0103 | 0.0105 | 2.76   | 3.17E-02 |
| 5.33 | 5.14  | 5.59   | 0.0103 | 3.78   | 0.0109 | 3.18E-02 |
| 4.49 | 4.22  | 4.12   | 0.0103 | 3.02   | 0.0109 | 3.19E-02 |
| 3.35 | 3.04  | 2.96   | 0.0103 | 2.19   | 0.0109 | 3.19E-02 |
| 4.9  | 4.37  | 4.22   | 3.12   | 3.78   | 2.51   | 3.19E-02 |
| 3.35 | 2.95  | 3.17   | 0.0103 | 2.22   | 0.0109 | 3.19E-02 |
| 3.35 | 2.95  | 3.17   | 0.0103 | 2.22   | 0.0109 | 3.19E-02 |
| 3.81 | 3.66  | 3.87   | 2.09   | 2.24   | 0.0109 | 3.19E-02 |
| 4.35 | 4.01  | 3.97   | 0.0103 | 2.9    | 0.0109 | 3.19E-02 |
| 5.34 | 4.33  | 4.02   | 0.0103 | 0.0105 | 3.07   | 3.21E-02 |
| 4.15 | 3.3   | 4.11   | 2.18   | 2.56   | 3.1    | 3.22E-02 |
| 4.15 | 3.3   | 4.11   | 2.18   | 2.56   | 3.1    | 3.22E-02 |
| 3.88 | 4.47  | 3.7    | 0.0103 | 2.79   | 0.0109 | 3.22E-02 |
| 3.69 | 3.45  | 4.02   | 0.0103 | 2.61   | 0.0109 | 3.22E-02 |
| 2.84 | 3.43  | 2.64   | 0.0103 | 2.02   | 0.0109 | 3.22E-02 |
| 3.25 | 2.55  | 3.94   | 0.0103 | 2.06   | 0.0109 | 3.22E-02 |
| 3.25 | 2.55  | 3.94   | 0.0103 | 2.06   | 0.0109 | 3.22E-02 |
| 4.12 | 3.85  | 3.53   | 0.0103 | 0.0105 | 2.69   | 3.22E-02 |
| 3.99 | 3.69  | 3.25   | 2.91   | 2.81   | 2.18   | 3.23E-02 |
| 3.5  | 2.96  | 2.54   | 2.01   | 0.0105 | 0.0109 | 3.24E-02 |
| 3.37 | 2.68  | 3.21   | 2.13   | 0.0105 | 0.0109 | 3.24E-02 |
| 4    | 4.04  | 3.47   | 0.0103 | 2.69   | 0.0109 | 3.24E-02 |
| 3.11 | 2.74  | 3.15   | 2.11   | 0.0105 | 0.0109 | 3.24E-02 |
| 3.49 | 3.44  | 2.99   | 2.32   | 0.0105 | 0.0109 | 3.25E-02 |
| 3.49 | 3.44  | 2.99   | 2.32   | 0.0105 | 0.0109 | 3.25E-02 |
| 2.85 | 3.08  | 3.66   | 0.0103 | 0.0105 | 2.19   | 3.25E-02 |
| 3.8  | 2.71  | 3.25   | 0.0103 | 2.17   | 0.0109 | 3.25E-02 |
| 2.75 | 3.61  | 2.93   | 0.0103 | 2.1    | 0.0109 | 3.25E-02 |

|      |      |      |        |        |        |          |
|------|------|------|--------|--------|--------|----------|
| 2.75 | 3.61 | 2.93 | 0.0103 | 2.1    | 0.0109 | 3.25E-02 |
| 3.47 | 3.37 | 3.52 | 2.51   | 3.1    | 2.22   | 3.26E-02 |
| 3.47 | 3.37 | 3.52 | 2.51   | 3.1    | 2.22   | 3.26E-02 |
| 5.35 | 4.78 | 5.04 | 3.58   | 0.0105 | 0.0109 | 3.26E-02 |
| 5.35 | 4.78 | 5.04 | 3.58   | 0.0105 | 0.0109 | 3.26E-02 |
| 2.87 | 2.93 | 3.17 | 0.0103 | 2.12   | 0.0109 | 3.26E-02 |
| 3.5  | 3.12 | 2.96 | 0.0103 | 2.24   | 0.0109 | 3.26E-02 |
| 3.5  | 3.12 | 2.96 | 0.0103 | 2.24   | 0.0109 | 3.26E-02 |
| 4.71 | 3.63 | 3.43 | 0.0103 | 0.0105 | 2.6    | 3.26E-02 |
| 3.1  | 2.85 | 2.84 | 0.0103 | 2.08   | 0.0109 | 3.27E-02 |
| 3.96 | 3.24 | 2.92 | 0.0103 | 2.27   | 0.0109 | 3.27E-02 |
| 4.26 | 4.31 | 4.1  | 0.0103 | 3.01   | 0.0109 | 3.27E-02 |
| 4.26 | 4.31 | 4.1  | 0.0103 | 3.01   | 0.0109 | 3.27E-02 |
| 4.26 | 4.31 | 4.1  | 0.0103 | 3.01   | 0.0109 | 3.27E-02 |
| 4.24 | 4.25 | 4.2  | 0.0103 | 3.02   | 0.0109 | 3.27E-02 |
| 4.24 | 4.25 | 4.2  | 0.0103 | 3.02   | 0.0109 | 3.27E-02 |
| 4.48 | 2.9  | 4.31 | 0.0103 | 0.0105 | 2.46   | 3.27E-02 |
| 3.86 | 4.79 | 4.22 | 3.43   | 2.73   | 3.35   | 3.28E-02 |
| 3.86 | 4.79 | 4.22 | 3.43   | 2.73   | 3.35   | 3.28E-02 |
| 4.97 | 4.2  | 3.9  | 0.0103 | 3      | 0.0109 | 3.28E-02 |
| 3.77 | 4.89 | 4.16 | 3.38   | 3.07   | 2.71   | 3.29E-02 |
| 3.77 | 4.89 | 4.16 | 3.38   | 3.07   | 2.71   | 3.29E-02 |
| 4.11 | 3.78 | 4.6  | 0.0103 | 2.91   | 0.0109 | 3.29E-02 |
| 4.11 | 3.78 | 4.6  | 0.0103 | 2.91   | 0.0109 | 3.29E-02 |
| 4.34 | 3.73 | 4.01 | 0.0103 | 2.28   | 2.3    | 3.29E-02 |
| 4.71 | 4.54 | 4.7  | 2.68   | 2.69   | 0.0109 | 3.30E-02 |
| 4.71 | 4.54 | 4.7  | 2.68   | 2.69   | 0.0109 | 3.30E-02 |
| 4.03 | 4.47 | 3.92 | 0.0103 | 2.93   | 0.0109 | 3.30E-02 |
| 2.97 | 3.42 | 3.22 | 2.82   | 2.79   | 2.63   | 3.30E-02 |
| 2.97 | 3.42 | 3.22 | 2.82   | 2.79   | 2.63   | 3.30E-02 |
| 3.71 | 3.26 | 3.17 | 0.0103 | 0.0105 | 2.38   | 3.30E-02 |
| 3.55 | 4    | 3.73 | 2.67   | 0.0105 | 0.0109 | 3.31E-02 |
| 2.83 | 3.38 | 2.79 | 2.09   | 0.0105 | 0.0109 | 3.31E-02 |
| 3.68 | 3.21 | 2.49 | 0.0103 | 0.0105 | 2.05   | 3.31E-02 |
| 3.68 | 3.21 | 2.49 | 0.0103 | 0.0105 | 2.05   | 3.31E-02 |
| 3.29 | 3.83 | 3.12 | 2.84   | 2.28   | 2.55   | 3.31E-02 |
| 3.29 | 3.83 | 3.12 | 2.84   | 2.28   | 2.55   | 3.31E-02 |
| 4.43 | 3.04 | 4.26 | 2.46   | 2.55   | 2.52   | 3.31E-02 |
| 4.43 | 3.04 | 4.26 | 2.46   | 2.55   | 2.52   | 3.31E-02 |
| 3.98 | 4.05 | 3.62 | 0.0103 | 2.76   | 0.0109 | 3.31E-02 |
| 4.93 | 4.23 | 4.47 | 3.21   | 0.0105 | 0.0109 | 3.32E-02 |
| 4    | 3.71 | 3.17 | 0.0103 | 2.52   | 0.0109 | 3.32E-02 |
| 3.36 | 4.28 | 4.66 | 0.0103 | 2.76   | 0.0109 | 3.32E-02 |
| 4.13 | 4.6  | 4.29 | 3.09   | 0.0105 | 0.0109 | 3.32E-02 |
| 3.88 | 5.06 | 4.56 | 2.75   | 3.62   | 3.05   | 3.33E-02 |
| 3.88 | 5.06 | 4.56 | 2.75   | 3.62   | 3.05   | 3.33E-02 |
| 3.87 | 3.37 | 3.87 | 0.0103 | 2.62   | 0.0109 | 3.33E-02 |
| 3.87 | 3.37 | 3.87 | 0.0103 | 2.62   | 0.0109 | 3.33E-02 |
| 3.25 | 2.77 | 2.9  | 2.1    | 0.0105 | 0.0109 | 3.33E-02 |
| 3.58 | 4.44 | 3.38 | 0.0103 | 2.59   | 0.0109 | 3.33E-02 |
| 4.8  | 5.3  | 4.52 | 3.67   | 3.51   | 4.29   | 3.33E-02 |
| 4.8  | 5.3  | 4.52 | 3.67   | 3.51   | 4.29   | 3.33E-02 |
| 4.8  | 5.3  | 4.52 | 3.67   | 3.51   | 4.29   | 3.33E-02 |
| 4.09 | 3.77 | 3.7  | 3.21   | 3.53   | 3.05   | 3.34E-02 |
| 4.09 | 3.77 | 3.7  | 3.21   | 3.53   | 3.05   | 3.34E-02 |
| 4.09 | 3.77 | 3.7  | 3.21   | 3.53   | 3.05   | 3.34E-02 |
| 3.79 | 3.51 | 3.33 | 2.86   | 3.18   | 2.66   | 3.34E-02 |
| 4.96 | 5.05 | 4.52 | 0.0103 | 0.0105 | 3.45   | 3.34E-02 |

|       |       |        |        |        |        |          |
|-------|-------|--------|--------|--------|--------|----------|
| 4.96  | 5.05  | 4.52   | 0.0103 | 0.0105 | 3.45   | 3.34E-02 |
| 3.15  | 3.22  | 3.29   | 0.0103 | 0.0105 | 2.31   | 3.34E-02 |
| 2.77  | 3.09  | 2.81   | 0.0103 | 0.0105 | 2.06   | 3.35E-02 |
| 4.29  | 3.33  | 3.85   | 2.65   | 0.0105 | 0.0109 | 3.36E-02 |
| 3.25  | 3.11  | 3.77   | 2.37   | 0.0105 | 0.0109 | 3.36E-02 |
| 3.25  | 3.11  | 3.77   | 2.37   | 0.0105 | 0.0109 | 3.36E-02 |
| 4.24  | 5.38  | 3.86   | 2.39   | 2.38   | 0.0109 | 3.37E-02 |
| 3.32  | 3.73  | 3.4    | 2.99   | 3.05   | 2.59   | 3.38E-02 |
| 3.32  | 3.73  | 3.4    | 2.99   | 3.05   | 2.59   | 3.38E-02 |
| 4.49  | 4.34  | 5.14   | 0.0103 | 0.0105 | 3.29   | 3.38E-02 |
| 3.67  | 3.88  | 3.31   | 2.57   | 0.0105 | 0.0109 | 3.38E-02 |
| 5.78  | 5.61  | 5.33   | 2.15   | 4.31   | 3.87   | 3.39E-02 |
| 5.78  | 5.61  | 5.33   | 2.15   | 4.31   | 3.87   | 3.39E-02 |
| 5.78  | 5.61  | 5.33   | 2.15   | 4.31   | 3.87   | 3.39E-02 |
| 3.4   | 4.32  | 2.63   | 2.14   | 0.0105 | 0.0109 | 3.39E-02 |
| 3.72  | 4.59  | 3.57   | 0.0103 | 2.73   | 0.0109 | 3.39E-02 |
| 3.72  | 4.59  | 3.57   | 0.0103 | 2.73   | 0.0109 | 3.39E-02 |
| 4.27  | 3.78  | 4.83   | 3.17   | 3.43   | 2.63   | 3.39E-02 |
| 3.27  | 3.23  | 2.85   | 0.0103 | 2.22   | 0.0109 | 3.40E-02 |
| 4.63  | 3.47  | 4.06   | 2.99   | 3.01   | 2.32   | 3.40E-02 |
| 3.27  | 3.45  | 3.45   | 2.44   | 0.0105 | 0.0109 | 3.40E-02 |
| 3.51  | 2.95  | 2.63   | 0.0103 | 0.0105 | 2.08   | 3.40E-02 |
| 3.25  | 3.43  | 3.17   | 0.0103 | 2.36   | 0.0109 | 3.41E-02 |
| 3.25  | 3.43  | 3.17   | 0.0103 | 2.36   | 0.0109 | 3.41E-02 |
| 5     | 4.53  | 5.12   | 0.0103 | 3.49   | 0.0109 | 3.41E-02 |
| 5     | 4.53  | 5.12   | 0.0103 | 3.49   | 0.0109 | 3.41E-02 |
| 5     | 4.53  | 5.12   | 0.0103 | 3.49   | 0.0109 | 3.41E-02 |
| 4.66  | 3.95  | 4.86   | 0.0103 | 2.78   | 2.23   | 3.41E-02 |
| 3.62  | 4.28  | 4.1    | 0.0103 | 2.84   | 0.0109 | 3.41E-02 |
| 3.62  | 4.28  | 4.1    | 0.0103 | 2.84   | 0.0109 | 3.41E-02 |
| 3.75  | 4.1   | 3.16   | 0.0103 | 2.55   | 0.0109 | 3.41E-02 |
| 3.92  | 3.25  | 4.14   | 0.0103 | 2.63   | 0.0109 | 3.42E-02 |
| 4.58  | 3.46  | 3.77   | 0.0103 | 2.08   | 2.23   | 3.42E-02 |
| 4.58  | 3.46  | 3.77   | 0.0103 | 2.08   | 2.23   | 3.42E-02 |
| 3.77  | 3.05  | 3.13   | 2.32   | 0.0105 | 0.0109 | 3.42E-02 |
| 4.56  | 4.81  | 5.26   | 0.0103 | 3.48   | 0.0109 | 3.42E-02 |
| 3.98  | 3.17  | 3.24   | 0.0103 | 2.41   | 0.0109 | 3.43E-02 |
| 3.98  | 3.17  | 3.24   | 0.0103 | 2.41   | 0.0109 | 3.43E-02 |
| 4.5   | 4.64  | 4.47   | 3.94   | 3.41   | 4.14   | 3.44E-02 |
| 4.5   | 4.64  | 4.47   | 3.94   | 3.41   | 4.14   | 3.44E-02 |
| 5.01  | 4.54  | 4.54   | 0.0103 | 3.37   | 0.0109 | 3.44E-02 |
| 5.01  | 4.54  | 4.54   | 0.0103 | 3.37   | 0.0109 | 3.44E-02 |
| 2.6   | 2.75  | 3.39   | 0.0103 | 0.0105 | 2.01   | 3.44E-02 |
| 5.38  | 4.85  | 4.69   | 3.63   | 3.95   | 2.37   | 3.44E-02 |
| 3.78  | 4.21  | 3.69   | 3.4    | 2.71   | 2.41   | 3.44E-02 |
| 2.73  | 5.37  | 4.42   | 0.0103 | 0.0105 | 2.28   | 3.45E-02 |
| 2.73  | 5.37  | 4.42   | 0.0103 | 0.0105 | 2.28   | 3.45E-02 |
| 0.011 | 0.012 | 2.19   | 3.3    | 3.6    | 2.66   | 3.45E-02 |
| 3.64  | 3.6   | 3.47   | 0.0103 | 2.58   | 0.0109 | 3.45E-02 |
| 3.64  | 3.6   | 3.47   | 0.0103 | 2.58   | 0.0109 | 3.45E-02 |
| 3.56  | 2.79  | 2.84   | 0.0103 | 0.0105 | 2.12   | 3.45E-02 |
| 4.2   | 4.79  | 4.77   | 0.0103 | 3.28   | 0.0109 | 3.45E-02 |
| 3.6   | 3.1   | 3.37   | 2.4    | 0.0105 | 0.0109 | 3.45E-02 |
| 3.6   | 3.1   | 3.37   | 2.4    | 0.0105 | 0.0109 | 3.45E-02 |
| 3.19  | 3.93  | 3.13   | 0.0103 | 2.38   | 0.0109 | 3.45E-02 |
| 3.19  | 3.93  | 3.13   | 0.0103 | 2.38   | 0.0109 | 3.45E-02 |
| 3.68  | 3.27  | 3.41   | 0.0103 | 2.48   | 0.0109 | 3.45E-02 |
| 2.24  | 0.012 | 0.0117 | 3.44   | 3.52   | 2.72   | 3.46E-02 |

|       |       |      |        |        |        |          |
|-------|-------|------|--------|--------|--------|----------|
| 3.29  | 2.97  | 3.2  | 2.27   | 0.0105 | 0.0109 | 3.46E-02 |
| 3.21  | 2.97  | 2.84 | 0.0103 | 0.0105 | 2.16   | 3.47E-02 |
| 4.67  | 2.86  | 3.93 | 0.0103 | 0.0105 | 2.41   | 3.47E-02 |
| 4.67  | 2.86  | 3.93 | 0.0103 | 0.0105 | 2.41   | 3.47E-02 |
| 2.99  | 3.62  | 2.9  | 2.22   | 0.0105 | 0.0109 | 3.47E-02 |
| 4.02  | 4     | 3.5  | 0.0103 | 2.75   | 0.0109 | 3.49E-02 |
| 4.02  | 4     | 3.5  | 0.0103 | 2.75   | 0.0109 | 3.49E-02 |
| 3.46  | 2.99  | 2.97 | 0.0103 | 2.24   | 0.0109 | 3.49E-02 |
| 3.46  | 2.99  | 2.97 | 0.0103 | 2.24   | 0.0109 | 3.49E-02 |
| 3.85  | 4.57  | 4.03 | 2.28   | 3.29   | 3.21   | 3.49E-02 |
| 2.92  | 2.58  | 2.89 | 2.01   | 0.0105 | 0.0109 | 3.49E-02 |
| 3.13  | 4.65  | 3.21 | 0.0103 | 0.0105 | 2.33   | 3.49E-02 |
| 3.88  | 3.59  | 3.73 | 2.22   | 2.42   | 3.31   | 3.49E-02 |
| 3.88  | 3.59  | 3.73 | 2.22   | 2.42   | 3.31   | 3.49E-02 |
| 3.88  | 3.59  | 3.73 | 2.22   | 2.42   | 3.31   | 3.49E-02 |
| 4.97  | 4.67  | 4.3  | 2.84   | 0.0105 | 2.5    | 3.50E-02 |
| 4.97  | 4.67  | 4.3  | 2.84   | 0.0105 | 2.5    | 3.50E-02 |
| 4     | 4.04  | 3.47 | 2.62   | 2.44   | 3.34   | 3.50E-02 |
| 2.89  | 3.26  | 3.49 | 0.0103 | 2.29   | 0.0109 | 3.51E-02 |
| 2.89  | 3.26  | 3.49 | 0.0103 | 2.29   | 0.0109 | 3.51E-02 |
| 3.97  | 4.53  | 4.36 | 3.13   | 3.61   | 2.36   | 3.51E-02 |
| 3.97  | 4.53  | 4.36 | 3.13   | 3.61   | 2.36   | 3.51E-02 |
| 3.33  | 4.15  | 4.11 | 0.0103 | 2.72   | 0.0109 | 3.51E-02 |
| 3.33  | 4.15  | 4.11 | 0.0103 | 2.72   | 0.0109 | 3.51E-02 |
| 5.11  | 4.09  | 4    | 0.0103 | 3.06   | 0.0109 | 3.51E-02 |
| 2.79  | 3.84  | 3.56 | 2.33   | 0.0105 | 0.0109 | 3.51E-02 |
| 2.79  | 3.84  | 3.56 | 2.33   | 0.0105 | 0.0109 | 3.51E-02 |
| 4.44  | 3.98  | 3.89 | 0.0103 | 2.95   | 0.0109 | 3.52E-02 |
| 4.44  | 3.98  | 3.89 | 0.0103 | 2.95   | 0.0109 | 3.52E-02 |
| 3.66  | 4.16  | 4.78 | 2.43   | 2.25   | 0.0109 | 3.53E-02 |
| 3.66  | 4.16  | 4.78 | 2.43   | 2.25   | 0.0109 | 3.53E-02 |
| 4.04  | 4.9   | 4.47 | 2.96   | 3.77   | 2.51   | 3.53E-02 |
| 3.49  | 3.01  | 3.3  | 0.0103 | 2.35   | 0.0109 | 3.53E-02 |
| 3.5   | 3.61  | 2.9  | 2.36   | 0.0105 | 0.0109 | 3.53E-02 |
| 3.5   | 3.61  | 2.9  | 2.36   | 0.0105 | 0.0109 | 3.53E-02 |
| 3.34  | 3.54  | 2.85 | 0.0103 | 2.3    | 0.0109 | 3.53E-02 |
| 0.011 | 0.012 | 2.38 | 3.22   | 3.54   | 3.13   | 3.54E-02 |
| 3.97  | 3.12  | 4.27 | 0.0103 | 2.61   | 0.0109 | 3.55E-02 |
| 3.97  | 3.12  | 4.27 | 0.0103 | 2.61   | 0.0109 | 3.55E-02 |
| 3     | 3.04  | 2.51 | 2.03   | 0.0105 | 0.0109 | 3.55E-02 |
| 3     | 3.04  | 2.51 | 2.03   | 0.0105 | 0.0109 | 3.55E-02 |
| 4.55  | 3.49  | 4.55 | 2.23   | 2.41   | 0.0109 | 3.56E-02 |
| 5.2   | 3.14  | 3.85 | 0.0103 | 0.0105 | 2.52   | 3.56E-02 |
| 2.8   | 3.43  | 3.66 | 0.0103 | 2.31   | 0.0109 | 3.56E-02 |
| 3.26  | 3.73  | 3.09 | 2.4    | 0.0105 | 0.0109 | 3.56E-02 |
| 3.26  | 3.73  | 3.09 | 2.4    | 0.0105 | 0.0109 | 3.56E-02 |
| 3.26  | 3.73  | 3.09 | 2.4    | 0.0105 | 0.0109 | 3.56E-02 |
| 5.23  | 4.39  | 4.39 | 3.16   | 3.95   | 2.82   | 3.56E-02 |
| 5.23  | 4.39  | 4.39 | 3.16   | 3.95   | 2.82   | 3.56E-02 |
| 4.7   | 3.91  | 3.38 | 2.74   | 0.0105 | 0.0109 | 3.57E-02 |
| 4.7   | 3.91  | 3.38 | 2.74   | 0.0105 | 0.0109 | 3.57E-02 |
| 2.51  | 2.63  | 2.81 | 2.95   | 3.63   | 3.61   | 3.58E-02 |
| 2.45  | 2.39  | 2.89 | 3.13   | 4.44   | 4.17   | 3.58E-02 |
| 4.52  | 3.64  | 4.28 | 3.15   | 3.45   | 2.76   | 3.58E-02 |
| 4.52  | 3.64  | 4.28 | 3.15   | 3.45   | 2.76   | 3.58E-02 |
| 4.52  | 3.64  | 4.28 | 3.15   | 3.45   | 2.76   | 3.58E-02 |
| 3.11  | 3.03  | 2.76 | 0.0103 | 2.15   | 0.0109 | 3.58E-02 |
| 4.17  | 3.88  | 3.34 | 0.0103 | 2.7    | 0.0109 | 3.58E-02 |

|      |      |      |        |        |        |          |
|------|------|------|--------|--------|--------|----------|
| 4.17 | 3.88 | 3.34 | 0.0103 | 2.7    | 0.0109 | 3.58E-02 |
| 4.17 | 3.88 | 3.34 | 0.0103 | 2.7    | 0.0109 | 3.58E-02 |
| 2.76 | 3.6  | 3.28 | 2.26   | 0.0105 | 0.0109 | 3.59E-02 |
| 4.8  | 3.83 | 4.25 | 3.05   | 0.0105 | 0.0109 | 3.59E-02 |
| 4.8  | 3.83 | 4.25 | 3.05   | 0.0105 | 0.0109 | 3.59E-02 |
| 2.66 | 2.47 | 2.06 | 3.19   | 2.84   | 3.39   | 3.59E-02 |
| 4.26 | 3    | 4.1  | 0.0103 | 2.57   | 0.0109 | 3.60E-02 |
| 4.26 | 3    | 4.1  | 0.0103 | 2.57   | 0.0109 | 3.60E-02 |
| 2.91 | 4.54 | 4.19 | 0.0103 | 0.0105 | 2.53   | 3.60E-02 |
| 3.63 | 3.32 | 4.61 | 0.0103 | 2.63   | 0.0109 | 3.60E-02 |
| 3.44 | 3.55 | 3.04 | 2.39   | 2.94   | 2.63   | 3.60E-02 |
| 4.41 | 4.81 | 3.13 | 0.0103 | 0.0105 | 2.71   | 3.61E-02 |
| 3.03 | 4.88 | 4.02 | 0.0103 | 2.56   | 0.0109 | 3.61E-02 |
| 3.03 | 4.88 | 4.02 | 0.0103 | 2.56   | 0.0109 | 3.61E-02 |
| 3.47 | 3.89 | 3.3  | 0.0103 | 2.56   | 0.0109 | 3.61E-02 |
| 3.47 | 3.89 | 3.3  | 0.0103 | 2.56   | 0.0109 | 3.61E-02 |
| 3.37 | 3.03 | 3.09 | 0.0103 | 2.3    | 0.0109 | 3.61E-02 |
| 3.37 | 3.03 | 3.09 | 0.0103 | 2.3    | 0.0109 | 3.61E-02 |
| 4.29 | 3.97 | 3.53 | 0.0103 | 2.82   | 0.0109 | 3.62E-02 |
| 4.13 | 4.1  | 4.1  | 0.0103 | 3.01   | 0.0109 | 3.62E-02 |
| 4.05 | 3.17 | 4.33 | 2.67   | 0.0105 | 0.0109 | 3.63E-02 |
| 3.43 | 3.88 | 3.67 | 2.66   | 0.0105 | 0.0109 | 3.63E-02 |
| 3.7  | 3.45 | 3.35 | 0.0103 | 2.55   | 0.0109 | 3.63E-02 |
| 3.7  | 3.45 | 3.35 | 0.0103 | 2.55   | 0.0109 | 3.63E-02 |
| 3.7  | 3.45 | 3.35 | 0.0103 | 2.55   | 0.0109 | 3.63E-02 |
| 4    | 4.23 | 4.53 | 0.0103 | 3.09   | 0.0109 | 3.63E-02 |
| 4    | 4.23 | 4.53 | 0.0103 | 3.09   | 0.0109 | 3.63E-02 |
| 4.17 | 4.16 | 4.56 | 3.13   | 0.0105 | 0.0109 | 3.63E-02 |
| 2.62 | 3.12 | 3.67 | 2.16   | 0.0105 | 0.0109 | 3.63E-02 |
| 2.62 | 3.12 | 3.67 | 2.16   | 0.0105 | 0.0109 | 3.63E-02 |
| 5.34 | 4.33 | 4.02 | 2.95   | 3.57   | 3.07   | 3.64E-02 |
| 5.34 | 4.33 | 4.02 | 2.95   | 3.57   | 3.07   | 3.64E-02 |
| 5.2  | 4.67 | 4.42 | 0.0103 | 3.44   | 0.0109 | 3.64E-02 |
| 3.18 | 4.23 | 3.56 | 0.0103 | 0.0105 | 2.56   | 3.64E-02 |
| 2.78 | 2.81 | 3.11 | 0.0103 | 2.11   | 0.0109 | 3.64E-02 |
| 4.08 | 3.67 | 3.85 | 2.82   | 0.0105 | 0.0109 | 3.65E-02 |
| 5.29 | 5.21 | 5.22 | 3.71   | 4.41   | 4.75   | 3.65E-02 |
| 5.29 | 5.21 | 5.22 | 3.71   | 4.41   | 4.75   | 3.65E-02 |
| 4.06 | 3.32 | 4.41 | 0.0103 | 2.76   | 0.0109 | 3.65E-02 |
| 4.06 | 3.32 | 4.41 | 0.0103 | 2.76   | 0.0109 | 3.65E-02 |
| 4.06 | 3.32 | 4.41 | 0.0103 | 2.76   | 0.0109 | 3.65E-02 |
| 4.63 | 4.47 | 4.42 | 2.69   | 2.62   | 0.0109 | 3.65E-02 |
| 4.64 | 4.7  | 4.5  | 3.17   | 4.23   | 3.32   | 3.65E-02 |
| 4.64 | 4.7  | 4.5  | 3.17   | 4.23   | 3.32   | 3.65E-02 |
| 4.64 | 4.7  | 4.5  | 3.17   | 4.23   | 3.32   | 3.65E-02 |
| 4.46 | 4.69 | 3.47 | 2.4    | 2.25   | 0.0109 | 3.66E-02 |
| 4.46 | 4.69 | 3.47 | 2.4    | 2.25   | 0.0109 | 3.66E-02 |
| 4.46 | 4.69 | 3.47 | 2.4    | 2.25   | 0.0109 | 3.66E-02 |
| 4.31 | 4.54 | 3.63 | 0.0103 | 2.97   | 0.0109 | 3.66E-02 |
| 4.31 | 4.54 | 3.63 | 0.0103 | 2.97   | 0.0109 | 3.66E-02 |
| 3.99 | 3.41 | 3.64 | 0.0103 | 2.21   | 2.06   | 3.66E-02 |
| 2.63 | 2.84 | 3.07 | 3.15   | 3.57   | 3.55   | 3.66E-02 |
| 2.63 | 2.84 | 3.07 | 3.15   | 3.57   | 3.55   | 3.66E-02 |
| 2.66 | 2.81 | 2.33 | 3.56   | 3.12   | 3.07   | 3.67E-02 |
| 2.66 | 2.81 | 2.33 | 3.56   | 3.12   | 3.07   | 3.67E-02 |
| 4.05 | 3.64 | 4.08 | 2.54   | 3.44   | 2.28   | 3.67E-02 |
| 3.28 | 3.32 | 2.62 | 0.0103 | 2.18   | 0.0109 | 3.67E-02 |
| 3.28 | 3.32 | 2.62 | 0.0103 | 2.18   | 0.0109 | 3.67E-02 |

|       |       |        |        |        |        |          |
|-------|-------|--------|--------|--------|--------|----------|
| 3.34  | 3.51  | 3.41   | 0.0103 | 2.51   | 0.0109 | 3.67E-02 |
| 3.34  | 3.51  | 3.41   | 0.0103 | 2.51   | 0.0109 | 3.67E-02 |
| 3.71  | 2.87  | 2.63   | 0.0103 | 2.09   | 0.0109 | 3.67E-02 |
| 3.71  | 2.87  | 2.63   | 0.0103 | 2.09   | 0.0109 | 3.67E-02 |
| 5.36  | 5.34  | 5.27   | 0.0103 | 3.91   | 0.0109 | 3.67E-02 |
| 5.36  | 5.34  | 5.27   | 0.0103 | 3.91   | 0.0109 | 3.67E-02 |
| 5.36  | 5.34  | 5.27   | 0.0103 | 3.91   | 0.0109 | 3.67E-02 |
| 2.8   | 2.71  | 3.47   | 0.0103 | 2.11   | 0.0109 | 3.67E-02 |
| 2.88  | 3.12  | 3.14   | 2.23   | 0.0105 | 0.0109 | 3.68E-02 |
| 0.011 | 2.25  | 0.0117 | 3.72   | 3.03   | 2.85   | 3.68E-02 |
| 0.011 | 0.012 | 2.21   | 5.12   | 3.89   | 2.66   | 3.68E-02 |
| 4.31  | 4.16  | 4.75   | 0.0103 | 2.65   | 2.49   | 3.68E-02 |
| 4.31  | 4.16  | 4.75   | 0.0103 | 2.65   | 2.49   | 3.68E-02 |
| 4.06  | 2.49  | 3.61   | 0.0103 | 2.18   | 0.0109 | 3.68E-02 |
| 4.06  | 2.49  | 3.61   | 0.0103 | 2.18   | 0.0109 | 3.68E-02 |
| 3.6   | 3.22  | 4.03   | 0.0103 | 2.59   | 0.0109 | 3.69E-02 |
| 3.65  | 2.84  | 2.77   | 0.0103 | 2.15   | 0.0109 | 3.69E-02 |
| 3.65  | 2.84  | 2.77   | 0.0103 | 2.15   | 0.0109 | 3.69E-02 |
| 4.12  | 3.74  | 3.98   | 0.0103 | 2.89   | 0.0109 | 3.69E-02 |
| 4.36  | 4.57  | 4.33   | 3.28   | 3.59   | 2.08   | 3.70E-02 |
| 4.36  | 4.57  | 4.33   | 3.28   | 3.59   | 2.08   | 3.70E-02 |
| 4.58  | 4.12  | 3.21   | 2.73   | 0.0105 | 0.0109 | 3.70E-02 |
| 4.37  | 4.05  | 4.65   | 3.32   | 3.8    | 2.77   | 3.70E-02 |
| 4.37  | 4.05  | 4.65   | 3.32   | 3.8    | 2.77   | 3.70E-02 |
| 3.24  | 2.84  | 3.65   | 2.31   | 0.0105 | 0.0109 | 3.70E-02 |
| 3.24  | 2.84  | 3.65   | 2.31   | 0.0105 | 0.0109 | 3.70E-02 |
| 3.05  | 3.21  | 2.82   | 2.21   | 0.0105 | 0.0109 | 3.70E-02 |
| 3.38  | 2.59  | 2.85   | 0.0103 | 2.08   | 0.0109 | 3.70E-02 |
| 3.38  | 2.59  | 2.85   | 0.0103 | 2.08   | 0.0109 | 3.70E-02 |
| 2.7   | 3.07  | 3.61   | 0.0103 | 2.2    | 0.0109 | 3.71E-02 |
| 2.7   | 3.07  | 3.61   | 0.0103 | 2.2    | 0.0109 | 3.71E-02 |
| 5.97  | 4.31  | 5.19   | 0.0103 | 3.59   | 0.0109 | 3.71E-02 |
| 0.011 | 2.12  | 0.0117 | 3.04   | 3.67   | 2.56   | 3.72E-02 |
| 0.011 | 2.12  | 0.0117 | 3.04   | 3.67   | 2.56   | 3.72E-02 |
| 3.32  | 3.37  | 3.55   | 0.0103 | 2.51   | 0.0109 | 3.72E-02 |
| 3.32  | 3.37  | 3.55   | 0.0103 | 2.51   | 0.0109 | 3.72E-02 |
| 4.24  | 4.73  | 3.5    | 2.92   | 0.0105 | 0.0109 | 3.72E-02 |
| 3.27  | 4.35  | 3.54   | 0.0103 | 2.61   | 0.0109 | 3.72E-02 |
| 0.011 | 0.012 | 2.06   | 2.38   | 3.68   | 3.23   | 3.72E-02 |
| 3.95  | 3.72  | 4.03   | 2.99   | 3.43   | 2.4    | 3.72E-02 |
| 3.95  | 3.72  | 4.03   | 2.99   | 3.43   | 2.4    | 3.72E-02 |
| 3.54  | 4.5   | 4.32   | 2.94   | 0.0105 | 0.0109 | 3.72E-02 |
| 3.54  | 4.5   | 4.32   | 2.94   | 0.0105 | 0.0109 | 3.72E-02 |
| 4.79  | 3.99  | 3.93   | 0.0103 | 2.24   | 2.59   | 3.72E-02 |
| 4.12  | 4.55  | 4.08   | 3.11   | 0.0105 | 0.0109 | 3.73E-02 |
| 3.25  | 3.3   | 3.38   | 2.44   | 0.0105 | 0.0109 | 3.73E-02 |
| 0.011 | 0.012 | 2.58   | 3.17   | 3.8    | 3.73   | 3.73E-02 |
| 3.82  | 3.25  | 2.92   | 0.0103 | 2.36   | 0.0109 | 3.73E-02 |
| 3.82  | 3.25  | 2.92   | 0.0103 | 2.36   | 0.0109 | 3.73E-02 |
| 4     | 3.71  | 3.17   | 2.6    | 0.0105 | 0.0109 | 3.73E-02 |
| 4.12  | 4.62  | 2.9    | 0.0103 | 2.54   | 0.0109 | 3.73E-02 |
| 4.12  | 4.62  | 2.9    | 0.0103 | 2.54   | 0.0109 | 3.73E-02 |
| 5.15  | 4.73  | 4.71   | 0.0103 | 3.29   | 2.27   | 3.73E-02 |
| 3.53  | 3.01  | 2.69   | 0.0103 | 2.18   | 0.0109 | 3.73E-02 |
| 3.53  | 3.01  | 2.69   | 0.0103 | 2.18   | 0.0109 | 3.73E-02 |
| 3.49  | 2.88  | 4.84   | 0.0103 | 0.0105 | 2.32   | 3.73E-02 |
| 3.49  | 2.88  | 4.84   | 0.0103 | 0.0105 | 2.32   | 3.73E-02 |
| 3.43  | 4.34  | 3.26   | 0.0103 | 0.0105 | 2.57   | 3.73E-02 |



|       |       |        |        |        |        |          |
|-------|-------|--------|--------|--------|--------|----------|
| 3.43  | 4.34  | 3.26   | 0.0103 | 0.0105 | 2.57   | 3.73E-02 |
| 2.7   | 3.38  | 3.3    | 0.0103 | 2.24   | 0.0109 | 3.74E-02 |
| 2.7   | 3.38  | 3.3    | 0.0103 | 2.24   | 0.0109 | 3.74E-02 |
| 3.88  | 3.96  | 4.09   | 3.33   | 3.43   | 2.55   | 3.74E-02 |
| 3.88  | 3.96  | 4.09   | 3.33   | 3.43   | 2.55   | 3.74E-02 |
| 2.94  | 3.01  | 4.23   | 0.0103 | 2.26   | 0.0109 | 3.75E-02 |
| 2.94  | 3.01  | 4.23   | 0.0103 | 2.26   | 0.0109 | 3.75E-02 |
| 5.28  | 4.45  | 4.35   | 0.0103 | 2.94   | 2.41   | 3.75E-02 |
| 5.28  | 4.45  | 4.35   | 0.0103 | 2.94   | 2.41   | 3.75E-02 |
| 3.85  | 3.86  | 2.65   | 0.0103 | 2.33   | 0.0109 | 3.75E-02 |
| 3.85  | 3.86  | 2.65   | 0.0103 | 2.33   | 0.0109 | 3.75E-02 |
| 4.19  | 4.03  | 4.62   | 3.13   | 0.0105 | 0.0109 | 3.76E-02 |
| 5.53  | 4.88  | 5.38   | 3.4    | 2.71   | 0.0109 | 3.76E-02 |
| 5.53  | 4.88  | 5.38   | 3.4    | 2.71   | 0.0109 | 3.76E-02 |
| 5.53  | 4.88  | 5.38   | 3.4    | 2.71   | 0.0109 | 3.76E-02 |
| 3.58  | 3.52  | 2.54   | 0.0103 | 2.21   | 0.0109 | 3.76E-02 |
| 2.87  | 2.63  | 3.09   | 2.09   | 0.0105 | 0.0109 | 3.77E-02 |
| 3.52  | 3.83  | 2.83   | 2.39   | 0.0105 | 0.0109 | 3.77E-02 |
| 3.48  | 2.53  | 2.98   | 2.1    | 0.0105 | 0.0109 | 3.77E-02 |
| 4.07  | 4.23  | 4.44   | 0.0103 | 0.0105 | 3.13   | 3.77E-02 |
| 4.07  | 4.23  | 4.44   | 0.0103 | 0.0105 | 3.13   | 3.77E-02 |
| 4.26  | 4.44  | 4.45   | 0.0103 | 3.24   | 0.0109 | 3.78E-02 |
| 0.011 | 3.41  | 0.0117 | 4.46   | 4.54   | 4.89   | 3.78E-02 |
| 0.011 | 3.41  | 0.0117 | 4.46   | 4.54   | 4.89   | 3.78E-02 |
| 4.76  | 4.68  | 4.9    | 3.14   | 2.46   | 0.0109 | 3.78E-02 |
| 4.76  | 4.68  | 4.9    | 3.14   | 2.46   | 0.0109 | 3.78E-02 |
| 4.76  | 4.68  | 4.9    | 3.14   | 2.46   | 0.0109 | 3.78E-02 |
| 2.81  | 2.78  | 2.98   | 0.0103 | 2.11   | 0.0109 | 3.78E-02 |
| 2.81  | 2.78  | 2.98   | 0.0103 | 2.11   | 0.0109 | 3.78E-02 |
| 3.32  | 3.38  | 2.74   | 2.27   | 0.0105 | 0.0109 | 3.79E-02 |
| 4.05  | 4     | 4.06   | 2.39   | 0.0105 | 2.41   | 3.79E-02 |
| 4.4   | 4.31  | 4.45   | 2.91   | 0.0105 | 2.22   | 3.79E-02 |
| 2.06  | 0.012 | 0.0117 | 2.63   | 2.79   | 2.99   | 3.79E-02 |
| 2.06  | 0.012 | 0.0117 | 2.63   | 2.79   | 2.99   | 3.79E-02 |
| 4.35  | 4.52  | 3.91   | 3.12   | 0.0105 | 0.0109 | 3.79E-02 |
| 0.011 | 0.012 | 3.18   | 4.51   | 4.02   | 4.45   | 3.79E-02 |
| 0.011 | 0.012 | 3.18   | 4.51   | 4.02   | 4.45   | 3.79E-02 |
| 3.13  | 2.6   | 3.18   | 3.66   | 3.44   | 3.9    | 3.79E-02 |
| 3.13  | 2.6   | 3.18   | 3.66   | 3.44   | 3.9    | 3.79E-02 |
| 3.16  | 3.13  | 3.14   | 0.0103 | 2.33   | 0.0109 | 3.80E-02 |
| 3.16  | 3.13  | 3.14   | 0.0103 | 2.33   | 0.0109 | 3.80E-02 |
| 3.2   | 4.17  | 3.5    | 0.0103 | 2.58   | 0.0109 | 3.80E-02 |
| 3.72  | 4     | 3.4    | 0.0103 | 2.71   | 0.0109 | 3.80E-02 |
| 3.72  | 4     | 3.4    | 0.0103 | 2.71   | 0.0109 | 3.80E-02 |
| 4.15  | 3.95  | 4.07   | 2.4    | 0.0105 | 2.42   | 3.80E-02 |
| 4.4   | 3.63  | 4.72   | 0.0103 | 2.41   | 2.42   | 3.80E-02 |
| 3.62  | 2.29  | 3.19   | 0.0103 | 2.01   | 0.0109 | 3.81E-02 |
| 3.62  | 2.29  | 3.19   | 0.0103 | 2.01   | 0.0109 | 3.81E-02 |
| 3.62  | 2.29  | 3.19   | 0.0103 | 2.01   | 0.0109 | 3.81E-02 |
| 3.39  | 3.9   | 3.29   | 0.0103 | 2.57   | 0.0109 | 3.81E-02 |
| 3.58  | 4.02  | 3.51   | 2.31   | 0.0105 | 2.02   | 3.81E-02 |
| 3.58  | 4.02  | 3.51   | 2.31   | 0.0105 | 2.02   | 3.81E-02 |
| 2.3   | 0.012 | 0.0117 | 3.07   | 3.61   | 2.89   | 3.82E-02 |
| 2.3   | 0.012 | 0.0117 | 3.07   | 3.61   | 2.89   | 3.82E-02 |
| 4.32  | 4.58  | 2.47   | 0.0103 | 2.24   | 0.0109 | 3.82E-02 |
| 4.32  | 4.58  | 2.47   | 0.0103 | 2.24   | 0.0109 | 3.82E-02 |
| 3.7   | 3.72  | 4.52   | 3.16   | 2.94   | 3.24   | 3.82E-02 |
| 3.7   | 3.72  | 4.52   | 3.16   | 2.94   | 3.24   | 3.82E-02 |

|       |       |        |        |        |        |          |
|-------|-------|--------|--------|--------|--------|----------|
| 3.7   | 3.72  | 4.52   | 3.16   | 2.94   | 3.24   | 3.82E-02 |
| 2.51  | 3.13  | 2.74   | 2.02   | 0.0105 | 0.0109 | 3.82E-02 |
| 3.06  | 2.56  | 2.84   | 0.0103 | 2.06   | 0.0109 | 3.82E-02 |
| 4.13  | 3.57  | 2.51   | 0.0103 | 0.0105 | 2.21   | 3.82E-02 |
| 4.13  | 3.57  | 2.51   | 0.0103 | 0.0105 | 2.21   | 3.82E-02 |
| 5.15  | 4.86  | 3.91   | 0.0103 | 2.3    | 2.89   | 3.82E-02 |
| 3.49  | 2.92  | 3.28   | 2.36   | 0.0105 | 0.0109 | 3.83E-02 |
| 5.33  | 4.45  | 4.29   | 0.0103 | 3.38   | 0.0109 | 3.83E-02 |
| 5.33  | 4.45  | 4.29   | 0.0103 | 3.38   | 0.0109 | 3.83E-02 |
| 5.33  | 4.45  | 4.29   | 0.0103 | 3.38   | 0.0109 | 3.83E-02 |
| 5.33  | 4.45  | 4.29   | 0.0103 | 3.38   | 0.0109 | 3.83E-02 |
| 4.63  | 3.76  | 3.47   | 2.37   | 3.04   | 2.8    | 3.83E-02 |
| 4.63  | 3.76  | 3.47   | 2.37   | 3.04   | 2.8    | 3.83E-02 |
| 4.63  | 3.76  | 3.47   | 2.37   | 3.04   | 2.8    | 3.83E-02 |
| 2.49  | 2.72  | 3.43   | 0.0103 | 2.01   | 0.0109 | 3.83E-02 |
| 4.03  | 3.36  | 4.73   | 0.0103 | 2.82   | 0.0109 | 3.83E-02 |
| 3.88  | 4.42  | 3.25   | 3      | 2.45   | 2.69   | 3.83E-02 |
| 3.6   | 3.39  | 3.57   | 2.61   | 0.0105 | 0.0109 | 3.83E-02 |
| 3.6   | 3.39  | 3.57   | 2.61   | 0.0105 | 0.0109 | 3.83E-02 |
| 0.011 | 0.012 | 2.18   | 2.83   | 2.8    | 3.72   | 3.84E-02 |
| 4.91  | 4.14  | 4.98   | 0.0103 | 2.24   | 3.08   | 3.85E-02 |
| 4.09  | 3.35  | 4.12   | 2.79   | 0.0105 | 0.0109 | 3.85E-02 |
| 4.09  | 3.35  | 4.12   | 2.79   | 0.0105 | 0.0109 | 3.85E-02 |
| 4.09  | 3.35  | 4.12   | 2.79   | 0.0105 | 0.0109 | 3.85E-02 |
| 4.29  | 4.27  | 4.72   | 0.0103 | 3.27   | 0.0109 | 3.85E-02 |
| 4.29  | 4.27  | 4.72   | 0.0103 | 3.27   | 0.0109 | 3.85E-02 |
| 4.29  | 4.27  | 4.72   | 0.0103 | 3.27   | 0.0109 | 3.85E-02 |
| 4.32  | 3.71  | 4.28   | 2.66   | 3.61   | 2.76   | 3.85E-02 |
| 4.06  | 3.82  | 4.14   | 0.0103 | 0.0105 | 2.97   | 3.85E-02 |
| 3.23  | 4.85  | 4.45   | 0.0103 | 2.84   | 0.0109 | 3.86E-02 |
| 3.45  | 4.49  | 4.4    | 2.11   | 2.52   | 0.0109 | 3.86E-02 |
| 0.011 | 0.012 | 2.03   | 2.49   | 2.76   | 3.36   | 3.86E-02 |
| 4.31  | 3.88  | 3.39   | 2.87   | 3.13   | 3.06   | 3.86E-02 |
| 4.28  | 3.74  | 4.42   | 3.04   | 0.0105 | 0.0109 | 3.87E-02 |
| 4.35  | 4.03  | 3.61   | 3.41   | 3.35   | 3.2    | 3.87E-02 |
| 4.35  | 4.03  | 3.61   | 3.41   | 3.35   | 3.2    | 3.87E-02 |
| 2.8   | 3.18  | 3.45   | 2.29   | 0.0105 | 0.0109 | 3.87E-02 |
| 3.06  | 2.68  | 2.76   | 2.09   | 0.0105 | 0.0109 | 3.88E-02 |
| 3.06  | 2.68  | 2.76   | 2.09   | 0.0105 | 0.0109 | 3.88E-02 |
| 4.94  | 4.9   | 5.1    | 0.0103 | 3.5    | 2.17   | 3.88E-02 |
| 4.94  | 4.9   | 5.1    | 0.0103 | 3.5    | 2.17   | 3.88E-02 |
| 4.11  | 4.1   | 4.26   | 2.84   | 3.44   | 3.74   | 3.88E-02 |
| 4.11  | 4.1   | 4.26   | 2.84   | 3.44   | 3.74   | 3.88E-02 |
| 3.43  | 3.3   | 2.6    | 0.0103 | 0.0105 | 2.22   | 3.88E-02 |
| 2.81  | 3.38  | 2.99   | 0.0103 | 2.24   | 0.0109 | 3.89E-02 |
| 2.81  | 3.38  | 2.99   | 0.0103 | 2.24   | 0.0109 | 3.89E-02 |
| 4.71  | 3.63  | 3.43   | 0.0103 | 2.74   | 0.0109 | 3.90E-02 |
| 4.97  | 4.64  | 4.63   | 3.87   | 3.94   | 2.73   | 3.90E-02 |
| 4.97  | 4.64  | 4.63   | 3.87   | 3.94   | 2.73   | 3.90E-02 |
| 3.24  | 2.59  | 2.65   | 0.0103 | 2.04   | 0.0109 | 3.90E-02 |
| 3.24  | 2.59  | 2.65   | 0.0103 | 2.04   | 0.0109 | 3.90E-02 |
| 4.54  | 3.03  | 4.35   | 0.0103 | 2.7    | 0.0109 | 3.91E-02 |
| 4.54  | 3.03  | 4.35   | 0.0103 | 2.7    | 0.0109 | 3.91E-02 |
| 2.42  | 0.012 | 0.0117 | 3.37   | 3.07   | 3.33   | 3.91E-02 |
| 3.22  | 3.56  | 3.26   | 3.03   | 2.53   | 2.84   | 3.91E-02 |
| 4.31  | 4.33  | 3.04   | 0.0103 | 2.69   | 0.0109 | 3.92E-02 |
| 4.31  | 4.33  | 3.04   | 0.0103 | 2.69   | 0.0109 | 3.92E-02 |
| 2.96  | 2.61  | 2.73   | 0.0103 | 2.05   | 0.0109 | 3.92E-02 |

|      |       |        |        |        |        |          |
|------|-------|--------|--------|--------|--------|----------|
| 3.33 | 3.41  | 5.03   | 2.56   | 0.0105 | 0.0109 | 3.92E-02 |
| 5.41 | 4.21  | 4.61   | 2.98   | 0.0105 | 2.41   | 3.93E-02 |
| 3.9  | 5.19  | 4.16   | 3.14   | 0.0105 | 0.0109 | 3.93E-02 |
| 3.9  | 5.19  | 4.16   | 3.14   | 0.0105 | 0.0109 | 3.93E-02 |
| 4.01 | 3.36  | 2.94   | 2.44   | 0.0105 | 0.0109 | 3.93E-02 |
| 4.01 | 3.36  | 2.94   | 2.44   | 0.0105 | 0.0109 | 3.93E-02 |
| 3.91 | 2.92  | 3.4    | 0.0103 | 2.44   | 0.0109 | 3.93E-02 |
| 5.26 | 3.76  | 4.18   | 0.0103 | 3.08   | 0.0109 | 3.93E-02 |
| 4.05 | 3.17  | 4.33   | 2.67   | 2.96   | 2.25   | 3.93E-02 |
| 3.83 | 3.1   | 4.31   | 2.28   | 2.33   | 2.93   | 3.94E-02 |
| 2.92 | 2.69  | 2.72   | 0.0103 | 2.07   | 0.0109 | 3.94E-02 |
| 2.92 | 2.69  | 2.72   | 0.0103 | 2.07   | 0.0109 | 3.94E-02 |
| 4.82 | 3.51  | 4.44   | 2.5    | 2.27   | 0.0109 | 3.95E-02 |
| 4.82 | 3.51  | 4.44   | 2.5    | 2.27   | 0.0109 | 3.95E-02 |
| 3.23 | 4.28  | 3.72   | 0.0103 | 2.69   | 0.0109 | 3.95E-02 |
| 3.82 | 4.09  | 4.47   | 3.35   | 3.39   | 2.49   | 3.96E-02 |
| 3.92 | 4.82  | 4.32   | 0.0103 | 3.19   | 0.0109 | 3.96E-02 |
| 3.92 | 4.82  | 4.32   | 0.0103 | 3.19   | 0.0109 | 3.96E-02 |
| 3.92 | 4.82  | 4.32   | 0.0103 | 3.19   | 0.0109 | 3.96E-02 |
| 3.68 | 3.96  | 4.43   | 0.0103 | 2.96   | 0.0109 | 3.96E-02 |
| 3.68 | 3.96  | 4.43   | 0.0103 | 2.96   | 0.0109 | 3.96E-02 |
| 3.68 | 3.96  | 4.43   | 0.0103 | 2.96   | 0.0109 | 3.96E-02 |
| 2.72 | 2.81  | 2.76   | 0.0103 | 2.07   | 0.0109 | 3.96E-02 |
| 4.03 | 3.51  | 4.06   | 0.0103 | 2.86   | 0.0109 | 3.97E-02 |
| 4.36 | 3.4   | 4.52   | 0.0103 | 2.93   | 0.0109 | 3.97E-02 |
| 4.36 | 3.4   | 4.52   | 0.0103 | 2.93   | 0.0109 | 3.97E-02 |
| 4.84 | 3.97  | 3.89   | 3.53   | 2.46   | 2.7    | 3.97E-02 |
| 3.9  | 4.36  | 4.92   | 2.8    | 2.24   | 0.0109 | 3.97E-02 |
| 3.9  | 4.36  | 4.92   | 2.8    | 2.24   | 0.0109 | 3.97E-02 |
| 5.35 | 4.78  | 5.04   | 3.58   | 0.0105 | 2.12   | 3.97E-02 |
| 3.62 | 2.96  | 3.43   | 0.0103 | 2.45   | 0.0109 | 3.98E-02 |
| 3.62 | 2.96  | 3.43   | 0.0103 | 2.45   | 0.0109 | 3.98E-02 |
| 5.54 | 4.8   | 5.85   | 4.1    | 4.67   | 3.82   | 3.98E-02 |
| 5.54 | 4.8   | 5.85   | 4.1    | 4.67   | 3.82   | 3.98E-02 |
| 5.54 | 4.8   | 5.85   | 4.1    | 4.67   | 3.82   | 3.98E-02 |
| 5.54 | 4.8   | 5.85   | 4.1    | 4.67   | 3.82   | 3.98E-02 |
| 3.36 | 3.55  | 3.1    | 2.48   | 0.0105 | 0.0109 | 3.98E-02 |
| 2.39 | 2.87  | 3.62   | 2.02   | 0.0105 | 0.0109 | 3.99E-02 |
| 4.26 | 3.99  | 4.94   | 2.39   | 0.0105 | 2.71   | 3.99E-02 |
| 2.82 | 3.19  | 2.9    | 2.21   | 0.0105 | 0.0109 | 3.99E-02 |
| 3.47 | 3.92  | 3.76   | 2.77   | 3.32   | 2.42   | 3.99E-02 |
| 3.47 | 3.92  | 3.76   | 2.77   | 3.32   | 2.42   | 3.99E-02 |
| 3.37 | 2.35  | 3.4    | 0.0103 | 2.1    | 0.0109 | 3.99E-02 |
| 3.37 | 2.35  | 3.4    | 0.0103 | 2.1    | 0.0109 | 3.99E-02 |
| 3.9  | 3.91  | 2.82   | 0.0103 | 2.49   | 0.0109 | 3.99E-02 |
| 3.9  | 3.91  | 2.82   | 0.0103 | 2.49   | 0.0109 | 3.99E-02 |
| 4.26 | 3.48  | 4.22   | 0.0103 | 2.92   | 0.0109 | 4.00E-02 |
| 3.68 | 3.91  | 4.03   | 3.62   | 3.28   | 3.14   | 4.00E-02 |
| 3.54 | 2.47  | 3.48   | 2.2    | 0.0105 | 0.0109 | 4.00E-02 |
| 5.1  | 5.36  | 4.75   | 3.37   | 4.54   | 3.86   | 4.00E-02 |
| 5.1  | 5.36  | 4.75   | 3.37   | 4.54   | 3.86   | 4.00E-02 |
| 4.12 | 3.75  | 3.4    | 0.0103 | 2.77   | 0.0109 | 4.01E-02 |
| 2.76 | 2.54  | 3.22   | 0.0103 | 0.0105 | 2.07   | 4.01E-02 |
| 5.16 | 3.61  | 5.25   | 0.0103 | 3.23   | 0.0109 | 4.01E-02 |
| 2.02 | 0.012 | 0.0117 | 2.79   | 2.9    | 2.47   | 4.03E-02 |
| 4.52 | 4.32  | 4.99   | 0.0103 | 3.43   | 0.0109 | 4.03E-02 |
| 4.52 | 4.32  | 4.99   | 0.0103 | 3.43   | 0.0109 | 4.03E-02 |
| 2.78 | 4.04  | 3.17   | 2.09   | 2.33   | 2.17   | 4.03E-02 |

|       |       |        |        |        |        |          |
|-------|-------|--------|--------|--------|--------|----------|
| 2.78  | 4.04  | 3.17   | 2.09   | 2.33   | 2.17   | 4.03E-02 |
| 3.84  | 3.74  | 4.82   | 0.0103 | 2.98   | 0.0109 | 4.04E-02 |
| 3.84  | 3.74  | 4.82   | 0.0103 | 2.98   | 0.0109 | 4.04E-02 |
| 4.37  | 2.19  | 4.21   | 0.0103 | 2.03   | 0.0109 | 4.04E-02 |
| 3.48  | 3.05  | 2.79   | 2.28   | 0.0105 | 0.0109 | 4.04E-02 |
| 3.02  | 2.69  | 2.69   | 2.52   | 2.36   | 2.45   | 4.04E-02 |
| 2.28  | 0.012 | 0.0117 | 3.99   | 3.32   | 2.63   | 4.04E-02 |
| 2.28  | 0.012 | 0.0117 | 3.99   | 3.32   | 2.63   | 4.04E-02 |
| 2.47  | 3.26  | 3.25   | 0.0103 | 0.0105 | 2.15   | 4.04E-02 |
| 2.47  | 3.26  | 3.25   | 0.0103 | 0.0105 | 2.15   | 4.04E-02 |
| 0.011 | 0.012 | 2.47   | 4.11   | 3.17   | 3.11   | 4.04E-02 |
| 4.24  | 3.75  | 3.38   | 0.0103 | 2.78   | 0.0109 | 4.04E-02 |
| 3.95  | 4.7   | 5      | 0.0103 | 2.89   | 2.35   | 4.04E-02 |
| 3.95  | 4.7   | 5      | 0.0103 | 2.89   | 2.35   | 4.04E-02 |
| 3.95  | 4.7   | 5      | 0.0103 | 2.89   | 2.35   | 4.04E-02 |
| 3.76  | 3.82  | 3.58   | 3.29   | 2.21   | 2.79   | 4.05E-02 |
| 3.76  | 3.82  | 3.58   | 3.29   | 2.21   | 2.79   | 4.05E-02 |
| 3.21  | 3.48  | 2.93   | 0.0103 | 2.38   | 0.0109 | 4.05E-02 |
| 4.97  | 4.91  | 4.16   | 2.15   | 3.88   | 2.96   | 4.05E-02 |
| 4.97  | 4.91  | 4.16   | 2.15   | 3.88   | 2.96   | 4.05E-02 |
| 5.49  | 4.31  | 5.3    | 0.0103 | 3.67   | 0.0109 | 4.05E-02 |
| 5.49  | 4.31  | 5.3    | 0.0103 | 3.67   | 0.0109 | 4.05E-02 |
| 3.95  | 4.57  | 4.3    | 0.0103 | 2.71   | 2.35   | 4.05E-02 |
| 3.95  | 4.57  | 4.3    | 0.0103 | 2.71   | 2.35   | 4.05E-02 |
| 3.59  | 3.11  | 2.87   | 0.0103 | 2.34   | 0.0109 | 4.05E-02 |
| 3.59  | 3.11  | 2.87   | 0.0103 | 2.34   | 0.0109 | 4.05E-02 |
| 4.99  | 4.2   | 4.19   | 2.15   | 2.97   | 0.0109 | 4.05E-02 |
| 3.65  | 3.19  | 3.26   | 0.0103 | 2.51   | 0.0109 | 4.06E-02 |
| 3.65  | 3.19  | 3.26   | 0.0103 | 2.51   | 0.0109 | 4.06E-02 |
| 3.65  | 3.26  | 3.19   | 0.0103 | 0.0105 | 2.51   | 4.06E-02 |
| 4.25  | 4.04  | 3.69   | 0.0103 | 0.0105 | 2.98   | 4.06E-02 |
| 2.71  | 4.63  | 3.94   | 2.44   | 0.0105 | 0.0109 | 4.06E-02 |
| 2.71  | 4.63  | 3.94   | 2.44   | 0.0105 | 0.0109 | 4.06E-02 |
| 4.79  | 5.05  | 4.75   | 4.2    | 4.41   | 3.57   | 4.06E-02 |
| 4.33  | 4.61  | 3.59   | 0.0103 | 3.05   | 0.0109 | 4.07E-02 |
| 3.13  | 2.8   | 2.71   | 0.0103 | 0.0105 | 2.15   | 4.09E-02 |
| 3.13  | 2.8   | 2.71   | 0.0103 | 0.0105 | 2.15   | 4.09E-02 |
| 3.94  | 2.53  | 3.41   | 0.0103 | 0.0105 | 2.25   | 4.09E-02 |
| 4.38  | 4.89  | 4.13   | 2.78   | 3.81   | 2.24   | 4.09E-02 |
| 4.38  | 4.89  | 4.13   | 2.78   | 3.81   | 2.24   | 4.09E-02 |
| 3.32  | 3.59  | 4.22   | 3.01   | 2.51   | 2.88   | 4.09E-02 |
| 3.32  | 3.59  | 4.22   | 3.01   | 2.51   | 2.88   | 4.09E-02 |
| 4.19  | 4.03  | 4.62   | 0.0103 | 3.2    | 0.0109 | 4.09E-02 |
| 3.39  | 2.78  | 3.1    | 0.0103 | 2.29   | 0.0109 | 4.10E-02 |
| 3.39  | 2.78  | 3.1    | 0.0103 | 2.29   | 0.0109 | 4.10E-02 |
| 3.15  | 2.79  | 2.9    | 2.21   | 0.0105 | 0.0109 | 4.10E-02 |
| 4.65  | 3.26  | 4.57   | 2.92   | 0.0105 | 0.0109 | 4.10E-02 |
| 2.67  | 0.012 | 0.0117 | 3.26   | 3.56   | 4.73   | 4.10E-02 |
| 2.67  | 0.012 | 0.0117 | 3.26   | 3.56   | 4.73   | 4.10E-02 |
| 3.31  | 4.15  | 4.04   | 2.27   | 2.2    | 0.0109 | 4.10E-02 |
| 3.31  | 4.15  | 4.04   | 2.27   | 2.2    | 0.0109 | 4.10E-02 |
| 3.69  | 3.69  | 2.82   | 2.41   | 2.7    | 2.22   | 4.10E-02 |
| 3.69  | 3.69  | 2.82   | 2.41   | 2.7    | 2.22   | 4.10E-02 |
| 2.82  | 3.03  | 2.63   | 2.19   | 2.57   | 2.17   | 4.12E-02 |
| 2.82  | 3.03  | 2.63   | 2.19   | 2.57   | 2.17   | 4.12E-02 |
| 2.99  | 0.012 | 0.0117 | 3.81   | 3.85   | 4.31   | 4.12E-02 |
| 3.79  | 4.72  | 2.65   | 0.0103 | 2.36   | 0.0109 | 4.12E-02 |
| 3.79  | 4.72  | 2.65   | 0.0103 | 2.36   | 0.0109 | 4.12E-02 |

|       |       |        |        |        |        |          |
|-------|-------|--------|--------|--------|--------|----------|
| 2.42  | 4.03  | 4.2    | 0.0103 | 2.26   | 0.0109 | 4.13E-02 |
| 2.42  | 4.03  | 4.2    | 0.0103 | 2.26   | 0.0109 | 4.13E-02 |
| 4.41  | 4.26  | 4.09   | 0.0103 | 3.21   | 0.0109 | 4.13E-02 |
| 4.41  | 4.26  | 4.09   | 0.0103 | 3.21   | 0.0109 | 4.13E-02 |
| 3.36  | 3.13  | 3.6    | 2.52   | 2.46   | 3.05   | 4.13E-02 |
| 4.87  | 3.41  | 4.96   | 2.64   | 3.22   | 2.49   | 4.13E-02 |
| 3.59  | 3.18  | 3.7    | 2.61   | 0.0105 | 0.0109 | 4.13E-02 |
| 5.15  | 2.35  | 4.39   | 0.0103 | 2.13   | 0.0109 | 4.13E-02 |
| 5.15  | 2.35  | 4.39   | 0.0103 | 2.13   | 0.0109 | 4.13E-02 |
| 3.03  | 3.16  | 2.88   | 0.0103 | 2.28   | 0.0109 | 4.13E-02 |
| 3.03  | 3.16  | 2.88   | 0.0103 | 2.28   | 0.0109 | 4.13E-02 |
| 3.82  | 4.5   | 3.47   | 3.19   | 2.85   | 2.44   | 4.13E-02 |
| 3.82  | 4.5   | 3.47   | 3.19   | 2.85   | 2.44   | 4.13E-02 |
| 2.91  | 2.81  | 2.4    | 0.0103 | 2.01   | 0.0109 | 4.13E-02 |
| 3.79  | 4.33  | 3.58   | 3.24   | 3.29   | 3.15   | 4.14E-02 |
| 3.79  | 4.33  | 3.58   | 3.24   | 3.29   | 3.15   | 4.14E-02 |
| 3.8   | 3.32  | 3.88   | 2.74   | 0.0105 | 0.0109 | 4.14E-02 |
| 4.37  | 4.1   | 4.53   | 0.0103 | 2.41   | 2.78   | 4.14E-02 |
| 4.37  | 4.1   | 4.53   | 0.0103 | 2.41   | 2.78   | 4.14E-02 |
| 3.84  | 3.25  | 3.72   | 0.0103 | 2.69   | 0.0109 | 4.14E-02 |
| 3.84  | 3.25  | 3.72   | 0.0103 | 2.69   | 0.0109 | 4.14E-02 |
| 3.75  | 2.58  | 3.91   | 2.35   | 0.0105 | 0.0109 | 4.14E-02 |
| 3.75  | 2.58  | 3.91   | 2.35   | 0.0105 | 0.0109 | 4.14E-02 |
| 2.76  | 2.58  | 3.55   | 0.0103 | 2.11   | 0.0109 | 4.15E-02 |
| 2.76  | 2.58  | 3.55   | 0.0103 | 2.11   | 0.0109 | 4.15E-02 |
| 3.54  | 2.43  | 3.08   | 0.0103 | 2.13   | 0.0109 | 4.15E-02 |
| 3.4   | 3.15  | 3.18   | 2.45   | 0.0105 | 0.0109 | 4.15E-02 |
| 4.64  | 3.75  | 3.76   | 3.21   | 3.01   | 2.26   | 4.15E-02 |
| 4.64  | 3.75  | 3.76   | 3.21   | 3.01   | 2.26   | 4.15E-02 |
| 5     | 4.19  | 4.29   | 0.0103 | 2.46   | 2.83   | 4.15E-02 |
| 5     | 4.19  | 4.29   | 0.0103 | 2.46   | 2.83   | 4.15E-02 |
| 4.98  | 4.1   | 4.64   | 2.17   | 3.86   | 2.72   | 4.16E-02 |
| 2.95  | 0.012 | 0.0117 | 3.98   | 4.09   | 3.67   | 4.16E-02 |
| 2.95  | 0.012 | 0.0117 | 3.98   | 4.09   | 3.67   | 4.16E-02 |
| 2.62  | 3.74  | 3.38   | 0.0103 | 2.31   | 0.0109 | 4.16E-02 |
| 3.12  | 3.09  | 2.71   | 0.0103 | 2.23   | 0.0109 | 4.16E-02 |
| 3.12  | 3.09  | 2.71   | 0.0103 | 2.23   | 0.0109 | 4.16E-02 |
| 2.94  | 4.44  | 3.7    | 0.0103 | 0.0105 | 2.57   | 4.17E-02 |
| 2.96  | 2.66  | 3.25   | 0.0103 | 0.0105 | 2.2    | 4.17E-02 |
| 0.011 | 0.012 | 2.34   | 3.49   | 2.8    | 3.18   | 4.17E-02 |
| 4.19  | 5.08  | 4.83   | 3.5    | 0.0105 | 0.0109 | 4.17E-02 |
| 4.19  | 5.08  | 4.83   | 3.5    | 0.0105 | 0.0109 | 4.17E-02 |
| 2.9   | 3.84  | 3.45   | 0.0103 | 2.48   | 0.0109 | 4.17E-02 |
| 2.9   | 3.84  | 3.45   | 0.0103 | 2.48   | 0.0109 | 4.17E-02 |
| 4.1   | 4.27  | 2.67   | 0.0103 | 2.47   | 0.0109 | 4.17E-02 |
| 4.1   | 4.27  | 2.67   | 0.0103 | 2.47   | 0.0109 | 4.17E-02 |
| 3.29  | 3.67  | 3.67   | 2.67   | 0.0105 | 0.0109 | 4.18E-02 |
| 3.83  | 4.42  | 3.32   | 2.81   | 0.0105 | 0.0109 | 4.18E-02 |
| 3.88  | 4.55  | 4.14   | 0.0103 | 2.37   | 2.62   | 4.18E-02 |
| 3.88  | 4.55  | 4.14   | 0.0103 | 2.37   | 2.62   | 4.18E-02 |
| 3.57  | 3.15  | 3.91   | 2.63   | 0.0105 | 0.0109 | 4.18E-02 |
| 4.31  | 3.88  | 3.92   | 1.95   | 3.4    | 2.83   | 4.18E-02 |
| 4.31  | 3.88  | 3.92   | 1.95   | 3.4    | 2.83   | 4.18E-02 |
| 4.07  | 2.66  | 3.14   | 0.0103 | 2.26   | 0.0109 | 4.18E-02 |
| 3.31  | 3.14  | 3.28   | 2.46   | 0.0105 | 0.0109 | 4.18E-02 |
| 4.15  | 4.07  | 5.07   | 0.0103 | 0.0105 | 3.26   | 4.18E-02 |
| 3.14  | 4.48  | 3.99   | 2.76   | 0.0105 | 0.0109 | 4.18E-02 |
| 4.51  | 5.19  | 5.13   | 2.81   | 3.09   | 0.0109 | 4.18E-02 |

|       |       |      |        |        |        |          |
|-------|-------|------|--------|--------|--------|----------|
| 4.51  | 5.19  | 5.13 | 2.81   | 3.09   | 0.0109 | 4.18E-02 |
| 3.21  | 2.41  | 3.76 | 2.15   | 0.0105 | 0.0109 | 4.18E-02 |
| 4.51  | 5.19  | 5.13 | 0.0103 | 3.09   | 2.81   | 4.19E-02 |
| 2.48  | 4.31  | 3.02 | 0.0103 | 2.06   | 0.0109 | 4.19E-02 |
| 3.57  | 3.38  | 2.63 | 0.0103 | 2.31   | 0.0109 | 4.19E-02 |
| 3.57  | 3.38  | 2.63 | 0.0103 | 2.31   | 0.0109 | 4.19E-02 |
| 2.96  | 3.89  | 2.98 | 2.36   | 0.0105 | 0.0109 | 4.19E-02 |
| 2.96  | 3.89  | 2.98 | 2.36   | 0.0105 | 0.0109 | 4.19E-02 |
| 3.32  | 3.6   | 3.18 | 3.01   | 3.03   | 2.83   | 4.19E-02 |
| 0.011 | 0.012 | 2.03 | 3.36   | 2.9    | 2.32   | 4.19E-02 |
| 0.011 | 0.012 | 2.03 | 3.36   | 2.9    | 2.32   | 4.19E-02 |
| 2.82  | 3.8   | 3.72 | 0.0103 | 2.49   | 0.0109 | 4.19E-02 |
| 2.82  | 3.8   | 3.72 | 0.0103 | 2.49   | 0.0109 | 4.19E-02 |
| 3.53  | 2.38  | 3.09 | 0.0103 | 2.11   | 0.0109 | 4.19E-02 |
| 3.54  | 2.25  | 3.05 | 0.0103 | 2.02   | 0.0109 | 4.19E-02 |
| 3.54  | 2.25  | 3.05 | 0.0103 | 2.02   | 0.0109 | 4.19E-02 |
| 4.18  | 3.84  | 4.02 | 0.0103 | 3.04   | 0.0109 | 4.20E-02 |
| 4     | 3.93  | 3.7  | 0.0103 | 2.94   | 0.0109 | 4.21E-02 |
| 4     | 3.93  | 3.7  | 0.0103 | 2.94   | 0.0109 | 4.21E-02 |
| 4     | 3.93  | 3.7  | 0.0103 | 2.94   | 0.0109 | 4.21E-02 |
| 3.94  | 3.14  | 3.17 | 0.0103 | 2.51   | 0.0109 | 4.21E-02 |
| 4.62  | 3.93  | 3.34 | 0.0103 | 2.86   | 0.0109 | 4.21E-02 |
| 3.57  | 2.82  | 2.97 | 2.3    | 0.0105 | 0.0109 | 4.22E-02 |
| 3.21  | 3.3   | 2.73 | 0.0103 | 0.0105 | 2.3    | 4.22E-02 |
| 4.12  | 4.72  | 5.22 | 2.72   | 2.63   | 3.97   | 4.22E-02 |
| 4.12  | 4.72  | 5.22 | 2.72   | 2.63   | 3.97   | 4.22E-02 |
| 4.08  | 4.71  | 3.73 | 0.0103 | 3.09   | 0.0109 | 4.23E-02 |
| 4.08  | 4.71  | 3.73 | 0.0103 | 3.09   | 0.0109 | 4.23E-02 |
| 0.011 | 0.012 | 2.37 | 2.88   | 4.02   | 3.09   | 4.23E-02 |
| 5.33  | 4.04  | 4.78 | 2.59   | 3.89   | 2.88   | 4.24E-02 |
| 5.33  | 4.04  | 4.78 | 2.59   | 3.89   | 2.88   | 4.24E-02 |
| 3.93  | 3.74  | 3.39 | 0.0103 | 2.78   | 0.0109 | 4.24E-02 |
| 3.07  | 2.7   | 3.39 | 0.0103 | 2.27   | 0.0109 | 4.24E-02 |
| 3.08  | 2.93  | 2.77 | 2.22   | 0.0105 | 0.0109 | 4.25E-02 |
| 4.7   | 4.63  | 4.97 | 0.0103 | 3.15   | 2.58   | 4.25E-02 |
| 4.7   | 4.63  | 4.97 | 0.0103 | 3.15   | 2.58   | 4.25E-02 |
| 2.65  | 3.02  | 2.53 | 0.0103 | 0.0105 | 2.05   | 4.25E-02 |
| 2.65  | 3.02  | 2.53 | 0.0103 | 0.0105 | 2.05   | 4.25E-02 |
| 3.08  | 3.64  | 3.29 | 2.46   | 2.26   | 2.96   | 4.26E-02 |
| 3.86  | 3.35  | 3.91 | 2.79   | 0.0105 | 0.0109 | 4.26E-02 |
| 3.93  | 3.86  | 4.06 | 0.0103 | 3.01   | 0.0109 | 4.26E-02 |
| 3.07  | 4.36  | 3.89 | 0.0103 | 2.71   | 0.0109 | 4.26E-02 |
| 3.37  | 3.58  | 2.47 | 0.0103 | 2.23   | 0.0109 | 4.26E-02 |
| 3.37  | 3.58  | 2.47 | 0.0103 | 2.23   | 0.0109 | 4.26E-02 |
| 3.64  | 2.62  | 3.37 | 2.32   | 0.0105 | 0.0109 | 4.26E-02 |
| 3.03  | 2.91  | 2.85 | 2.4    | 2.57   | 2.77   | 4.27E-02 |
| 0.011 | 0.012 | 2.26 | 2.56   | 4.09   | 3.29   | 4.27E-02 |
| 0.011 | 0.012 | 2.26 | 2.56   | 4.09   | 3.29   | 4.27E-02 |
| 4.54  | 4.69  | 4.22 | 2.64   | 2.78   | 0.0109 | 4.27E-02 |
| 3.81  | 2.2   | 3.87 | 2.09   | 0.0105 | 0.0109 | 4.27E-02 |
| 4.62  | 3.96  | 4.78 | 2.65   | 2.65   | 0.0109 | 4.27E-02 |
| 3.46  | 2.63  | 3.51 | 0.0103 | 2.33   | 0.0109 | 4.27E-02 |
| 3.4   | 2.48  | 3.07 | 0.0103 | 2.17   | 0.0109 | 4.27E-02 |
| 3.4   | 2.48  | 3.07 | 0.0103 | 2.17   | 0.0109 | 4.27E-02 |
| 4.76  | 3.76  | 4.13 | 0.0103 | 3.13   | 0.0109 | 4.27E-02 |
| 4.76  | 3.76  | 4.13 | 0.0103 | 3.13   | 0.0109 | 4.27E-02 |
| 3.66  | 4.03  | 4.42 | 0.0103 | 3.03   | 0.0109 | 4.28E-02 |
| 2.94  | 3.14  | 3.7  | 0.0103 | 2.42   | 0.0109 | 4.28E-02 |

|       |       |      |        |        |        |          |
|-------|-------|------|--------|--------|--------|----------|
| 2.94  | 3.14  | 3.7  | 0.0103 | 2.42   | 0.0109 | 4.28E-02 |
| 3     | 3.38  | 2.95 | 0.0103 | 0.0105 | 2.35   | 4.28E-02 |
| 4.47  | 3.92  | 4.68 | 2.3    | 3.52   | 3.35   | 4.28E-02 |
| 2.57  | 3.87  | 4.21 | 0.0103 | 0.0105 | 2.39   | 4.28E-02 |
| 2.57  | 3.87  | 4.21 | 0.0103 | 0.0105 | 2.39   | 4.28E-02 |
| 5.15  | 4.68  | 4.48 | 0.0103 | 3.32   | 2.24   | 4.28E-02 |
| 2.94  | 3.59  | 3.2  | 0.0103 | 2.43   | 0.0109 | 4.28E-02 |
| 3.93  | 3.85  | 5.13 | 0.0103 | 3.11   | 0.0109 | 4.29E-02 |
| 3.93  | 3.85  | 5.13 | 0.0103 | 3.11   | 0.0109 | 4.29E-02 |
| 3.93  | 3.85  | 5.13 | 0.0103 | 3.11   | 0.0109 | 4.29E-02 |
| 5.32  | 5.21  | 5.1  | 4.71   | 3.69   | 3.13   | 4.29E-02 |
| 5.32  | 5.21  | 5.1  | 4.71   | 3.69   | 3.13   | 4.29E-02 |
| 4.73  | 4.72  | 4.1  | 3.54   | 4.07   | 3.49   | 4.29E-02 |
| 4.73  | 4.72  | 4.1  | 3.54   | 4.07   | 3.49   | 4.29E-02 |
| 4.73  | 4.72  | 4.1  | 3.54   | 4.07   | 3.49   | 4.29E-02 |
| 3.72  | 2.6   | 3.62 | 2.36   | 0.0105 | 0.0109 | 4.30E-02 |
| 3.72  | 2.6   | 3.62 | 2.36   | 0.0105 | 0.0109 | 4.30E-02 |
| 4.38  | 4.24  | 3.7  | 2.23   | 3.55   | 2.13   | 4.30E-02 |
| 4.27  | 4.68  | 3.83 | 2.88   | 3.72   | 3.09   | 4.30E-02 |
| 3.59  | 2.98  | 3.5  | 0.0103 | 2.52   | 0.0109 | 4.30E-02 |
| 3.59  | 2.98  | 3.5  | 0.0103 | 2.52   | 0.0109 | 4.30E-02 |
| 3.71  | 3.76  | 3.15 | 0.0103 | 2.66   | 0.0109 | 4.30E-02 |
| 3.71  | 3.76  | 3.15 | 0.0103 | 2.66   | 0.0109 | 4.30E-02 |
| 3.71  | 3.76  | 3.15 | 0.0103 | 2.66   | 0.0109 | 4.30E-02 |
| 3     | 3.2   | 2.56 | 0.0103 | 2.18   | 0.0109 | 4.30E-02 |
| 3     | 3.2   | 2.56 | 0.0103 | 2.18   | 0.0109 | 4.30E-02 |
| 3     | 3.2   | 2.56 | 0.0103 | 2.18   | 0.0109 | 4.30E-02 |
| 3     | 3.2   | 2.56 | 0.0103 | 2.18   | 0.0109 | 4.30E-02 |
| 5.07  | 4.33  | 4.37 | 3.27   | 3.81   | 3.93   | 4.30E-02 |
| 5.07  | 4.33  | 4.37 | 3.27   | 3.81   | 3.93   | 4.30E-02 |
| 5.07  | 4.33  | 4.37 | 3.27   | 3.81   | 3.93   | 4.30E-02 |
| 3.72  | 3.21  | 3.62 | 0.0103 | 2.66   | 0.0109 | 4.30E-02 |
| 3.98  | 3.71  | 4.61 | 2.48   | 3.51   | 2.4    | 4.31E-02 |
| 3.98  | 3.71  | 4.61 | 2.48   | 3.51   | 2.4    | 4.31E-02 |
| 4.58  | 4.22  | 4.23 | 0.0103 | 3.31   | 0.0109 | 4.31E-02 |
| 4.58  | 4.22  | 4.23 | 0.0103 | 3.31   | 0.0109 | 4.31E-02 |
| 0.011 | 0.012 | 2.28 | 2.77   | 3.49   | 2.94   | 4.32E-02 |
| 4.63  | 5.2   | 4.14 | 2.58   | 2.91   | 0.0109 | 4.32E-02 |
| 4.63  | 5.2   | 4.14 | 2.58   | 2.91   | 0.0109 | 4.32E-02 |
| 4.98  | 4.14  | 4.98 | 0.0103 | 3      | 2.56   | 4.32E-02 |
| 3.52  | 3.57  | 3.8  | 3.08   | 3.37   | 2.79   | 4.32E-02 |
| 4.55  | 4.17  | 4.09 | 0.0103 | 3.25   | 0.0109 | 4.33E-02 |
| 3.15  | 2.71  | 2.88 | 0.0103 | 0.0105 | 2.21   | 4.35E-02 |
| 3.02  | 2.74  | 3.31 | 0.0103 | 2.28   | 0.0109 | 4.35E-02 |
| 0.011 | 0.012 | 2.2  | 3.21   | 2.46   | 3.42   | 4.35E-02 |
| 0.011 | 0.012 | 2.2  | 3.21   | 2.46   | 3.42   | 4.35E-02 |
| 5.09  | 3.47  | 4.76 | 0.0103 | 3.16   | 0.0109 | 4.36E-02 |
| 4.87  | 4.74  | 4.63 | 0.0103 | 3.23   | 2.48   | 4.36E-02 |
| 5.32  | 4.49  | 3.72 | 0.0103 | 0.0105 | 3.25   | 4.36E-02 |
| 3.82  | 3.19  | 4.04 | 0.0103 | 0.0105 | 2.75   | 4.36E-02 |
| 3.16  | 2.82  | 2.98 | 2.28   | 0.0105 | 0.0109 | 4.37E-02 |
| 4.84  | 4.67  | 4.16 | 2.97   | 2.49   | 0.0109 | 4.37E-02 |
| 3.25  | 2.93  | 2.94 | 0.0103 | 2.32   | 0.0109 | 4.38E-02 |
| 3.25  | 2.93  | 2.94 | 0.0103 | 2.32   | 0.0109 | 4.38E-02 |
| 4.16  | 3.38  | 4.6  | 2.73   | 3.25   | 2.56   | 4.38E-02 |
| 0.011 | 0.012 | 2.3  | 2.67   | 3.14   | 4.06   | 4.38E-02 |
| 0.011 | 0.012 | 2.3  | 2.67   | 3.14   | 4.06   | 4.38E-02 |
| 4.64  | 4.21  | 3.8  | 2.57   | 2.47   | 0.0109 | 4.38E-02 |

|       |       |        |        |        |        |          |
|-------|-------|--------|--------|--------|--------|----------|
| 4.64  | 4.21  | 3.8    | 2.57   | 2.47   | 0.0109 | 4.38E-02 |
| 3.39  | 4.45  | 2.43   | 0.0103 | 2.17   | 0.0109 | 4.38E-02 |
| 3.39  | 4.45  | 2.43   | 0.0103 | 2.17   | 0.0109 | 4.38E-02 |
| 2.72  | 0.012 | 0.0117 | 3.37   | 3.88   | 3.48   | 4.38E-02 |
| 2.72  | 0.012 | 0.0117 | 3.37   | 3.88   | 3.48   | 4.38E-02 |
| 2.97  | 3.45  | 4.14   | 0.0103 | 2.56   | 0.0109 | 4.38E-02 |
| 2.97  | 3.45  | 4.14   | 0.0103 | 2.56   | 0.0109 | 4.38E-02 |
| 4.33  | 4.03  | 5.12   | 3.35   | 0.0105 | 0.0109 | 4.39E-02 |
| 4.33  | 4.03  | 5.12   | 3.35   | 0.0105 | 0.0109 | 4.39E-02 |
| 3.64  | 2.57  | 3.14   | 0.0103 | 2.26   | 0.0109 | 4.39E-02 |
| 3.53  | 2.32  | 3.12   | 0.0103 | 2.11   | 0.0109 | 4.39E-02 |
| 3.5   | 4.44  | 4.77   | 2.57   | 3.1    | 3.26   | 4.39E-02 |
| 3.5   | 4.44  | 4.77   | 2.57   | 3.1    | 3.26   | 4.39E-02 |
| 3.87  | 3.6   | 3.2    | 0.0103 | 2.69   | 0.0109 | 4.40E-02 |
| 4.08  | 3.32  | 3.3    | 2.24   | 2.98   | 2.57   | 4.40E-02 |
| 0.011 | 2.16  | 0.0117 | 2.54   | 3.67   | 2.86   | 4.41E-02 |
| 3.91  | 3.28  | 2.81   | 2.51   | 2.34   | 2.33   | 4.41E-02 |
| 3.19  | 2.77  | 3.05   | 0.0103 | 0.0105 | 2.29   | 4.41E-02 |
| 3.19  | 2.77  | 3.05   | 0.0103 | 0.0105 | 2.29   | 4.41E-02 |
| 2.51  | 2.65  | 2.85   | 2.04   | 0.0105 | 0.0109 | 4.41E-02 |
| 4.35  | 3.91  | 4.33   | 0.0103 | 2.84   | 2.19   | 4.41E-02 |
| 4.35  | 3.91  | 4.33   | 0.0103 | 2.84   | 2.19   | 4.41E-02 |
| 4.69  | 5.35  | 4.97   | 2.92   | 4.39   | 3.65   | 4.41E-02 |
| 4.69  | 5.35  | 4.97   | 2.92   | 4.39   | 3.65   | 4.41E-02 |
| 4.69  | 5.35  | 4.97   | 2.92   | 4.39   | 3.65   | 4.41E-02 |
| 4.69  | 5.35  | 4.97   | 2.92   | 4.39   | 3.65   | 4.41E-02 |
| 4.69  | 5.35  | 4.97   | 2.92   | 4.39   | 3.65   | 4.41E-02 |
| 4.69  | 5.35  | 4.97   | 2.92   | 4.39   | 3.65   | 4.41E-02 |
| 4.69  | 5.35  | 4.97   | 2.92   | 4.39   | 3.65   | 4.41E-02 |
| 4.23  | 4.01  | 3.93   | 0.0103 | 2.58   | 2.37   | 4.41E-02 |
| 4.33  | 3.47  | 3.17   | 2.36   | 2.7    | 2.72   | 4.41E-02 |
| 0.011 | 0.012 | 2.63   | 3.09   | 4.13   | 3.47   | 4.42E-02 |
| 4.05  | 3.47  | 4.7    | 0.0103 | 3      | 0.0109 | 4.42E-02 |
| 4.05  | 3.47  | 4.7    | 0.0103 | 3      | 0.0109 | 4.42E-02 |
| 4.21  | 4.44  | 4.26   | 0.0103 | 3.31   | 0.0109 | 4.42E-02 |
| 2.85  | 2.85  | 3.31   | 2.28   | 0.0105 | 0.0109 | 4.42E-02 |
| 2.85  | 2.85  | 3.31   | 2.28   | 0.0105 | 0.0109 | 4.42E-02 |
| 4.02  | 4.54  | 4.22   | 2.63   | 2.55   | 0.0109 | 4.43E-02 |
| 4.02  | 4.54  | 4.22   | 2.63   | 2.55   | 0.0109 | 4.43E-02 |
| 3.97  | 4.13  | 5.05   | 2.95   | 3.65   | 2.64   | 4.43E-02 |
| 3.97  | 4.13  | 5.05   | 2.95   | 3.65   | 2.64   | 4.43E-02 |
| 3.97  | 4.13  | 5.05   | 2.95   | 3.65   | 2.64   | 4.43E-02 |
| 3.33  | 2.98  | 3.38   | 2.8    | 2.7    | 2.17   | 4.43E-02 |
| 3.59  | 2.98  | 3.5    | 0.0103 | 0.0105 | 2.54   | 4.43E-02 |
| 3.24  | 2.95  | 3      | 2.35   | 0.0105 | 0.0109 | 4.43E-02 |
| 3.24  | 2.95  | 3      | 2.35   | 0.0105 | 0.0109 | 4.43E-02 |
| 4.88  | 5.05  | 4.16   | 0.0103 | 3.55   | 0.0109 | 4.43E-02 |
| 4.88  | 5.05  | 4.16   | 0.0103 | 3.55   | 0.0109 | 4.43E-02 |
| 4.17  | 3.82  | 4.22   | 0.0103 | 3.12   | 0.0109 | 4.43E-02 |
| 4.17  | 3.82  | 4.22   | 0.0103 | 3.12   | 0.0109 | 4.43E-02 |
| 4.17  | 3.82  | 4.22   | 0.0103 | 3.12   | 0.0109 | 4.43E-02 |
| 4.37  | 4.66  | 4.31   | 2.94   | 2.46   | 0.0109 | 4.44E-02 |
| 0.011 | 0.012 | 2.04   | 2.95   | 2.3    | 3      | 4.44E-02 |
| 2.88  | 3.12  | 3.14   | 0.0103 | 2.34   | 0.0109 | 4.44E-02 |
| 3.57  | 4.68  | 4.28   | 2.61   | 3.46   | 2.23   | 4.44E-02 |
| 4.43  | 4.23  | 4.08   | 2.51   | 2.68   | 0.0109 | 4.44E-02 |
| 4.43  | 4.23  | 4.08   | 2.51   | 2.68   | 0.0109 | 4.44E-02 |
| 3.7   | 2.72  | 2.78   | 0.0103 | 2.22   | 0.0109 | 4.44E-02 |
| 3.7   | 2.72  | 2.78   | 0.0103 | 2.22   | 0.0109 | 4.44E-02 |



|       |       |        |        |        |        |          |
|-------|-------|--------|--------|--------|--------|----------|
| 4.68  | 3.64  | 3.22   | 2.72   | 2.57   | 2.4    | 4.45E-02 |
| 2.74  | 3.26  | 2.65   | 0.0103 | 2.17   | 0.0109 | 4.45E-02 |
| 4.79  | 3.99  | 3.93   | 2.76   | 2.24   | 0.0109 | 4.45E-02 |
| 4.79  | 3.99  | 3.93   | 2.76   | 2.24   | 0.0109 | 4.45E-02 |
| 2.04  | 0.012 | 0.0117 | 2.74   | 2.95   | 2.4    | 4.45E-02 |
| 0.011 | 2.09  | 0.0117 | 2.48   | 2.72   | 3.18   | 4.45E-02 |
| 3.5   | 4.26  | 3.61   | 0.0103 | 0.0105 | 2.86   | 4.45E-02 |
| 3.43  | 3.32  | 3.7    | 2.75   | 3.18   | 2.46   | 4.46E-02 |
| 3.43  | 3.32  | 3.7    | 2.75   | 3.18   | 2.46   | 4.46E-02 |
| 0.011 | 2.38  | 0.0117 | 3.4    | 3.47   | 2.7    | 4.46E-02 |
| 2.83  | 3.24  | 3.58   | 0.0103 | 2.42   | 0.0109 | 4.46E-02 |
| 2.71  | 5.2   | 4.03   | 0.0103 | 2.47   | 0.0109 | 4.47E-02 |
| 2.71  | 5.2   | 4.03   | 0.0103 | 2.47   | 0.0109 | 4.47E-02 |
| 3.24  | 2.81  | 3.4    | 0.0103 | 0.0105 | 2.39   | 4.47E-02 |
| 3.71  | 3.58  | 3.39   | 2.74   | 0.0105 | 0.0109 | 4.47E-02 |
| 4.65  | 3.79  | 3.9    | 0.0103 | 3.1    | 0.0109 | 4.47E-02 |
| 4.65  | 3.79  | 3.9    | 0.0103 | 3.1    | 0.0109 | 4.47E-02 |
| 4.62  | 3.93  | 3.34   | 2.91   | 0.0105 | 0.0109 | 4.48E-02 |
| 4.93  | 4.53  | 4.68   | 3.02   | 2.74   | 0.0109 | 4.48E-02 |
| 4.8   | 3.22  | 4.43   | 2.84   | 2.8    | 2.65   | 4.48E-02 |
| 4.13  | 3.82  | 2.66   | 0.0103 | 2.48   | 0.0109 | 4.48E-02 |
| 3.4   | 3.4   | 2.92   | 0.0103 | 2.47   | 0.0109 | 4.48E-02 |
| 3.4   | 3.4   | 2.92   | 0.0103 | 2.47   | 0.0109 | 4.48E-02 |
| 3.4   | 4.08  | 4.08   | 0.0103 | 2.92   | 0.0109 | 4.48E-02 |
| 3.14  | 3.18  | 2.65   | 2.42   | 2.17   | 2.58   | 4.48E-02 |
| 4.44  | 4.19  | 3.81   | 0.0103 | 3.17   | 0.0109 | 4.48E-02 |
| 3.49  | 3.28  | 2.38   | 0.0103 | 2.19   | 0.0109 | 4.49E-02 |
| 5.1   | 4.24  | 3.98   | 0.0103 | 3.32   | 0.0109 | 4.49E-02 |
| 3.58  | 2.63  | 3.39   | 2.36   | 0.0105 | 0.0109 | 4.50E-02 |
| 3.58  | 2.63  | 3.39   | 2.36   | 0.0105 | 0.0109 | 4.50E-02 |
| 4.87  | 4.74  | 4.63   | 2.53   | 3.23   | 0.0109 | 4.50E-02 |
| 4.87  | 4.74  | 4.63   | 2.53   | 3.23   | 0.0109 | 4.50E-02 |
| 4.39  | 3.72  | 3.42   | 0.0103 | 0.0105 | 2.88   | 4.50E-02 |
| 3.36  | 2.56  | 2.52   | 0.0103 | 2.06   | 0.0109 | 4.50E-02 |
| 3.36  | 2.56  | 2.52   | 0.0103 | 2.06   | 0.0109 | 4.50E-02 |
| 0.011 | 2.13  | 0.0117 | 2.53   | 3.07   | 2.8    | 4.50E-02 |
| 0.011 | 2.13  | 0.0117 | 2.53   | 3.07   | 2.8    | 4.50E-02 |
| 2.89  | 2.93  | 3.89   | 2.36   | 0.0105 | 0.0109 | 4.51E-02 |
| 3.76  | 3.76  | 3.09   | 2.73   | 3.04   | 2.68   | 4.51E-02 |
| 3.76  | 3.76  | 3.09   | 2.73   | 3.04   | 2.68   | 4.51E-02 |
| 4.34  | 4.13  | 3.59   | 0.0103 | 2.34   | 2.5    | 4.51E-02 |
| 4.34  | 4.13  | 3.59   | 0.0103 | 2.34   | 2.5    | 4.51E-02 |
| 5.29  | 4.38  | 4.76   | 2.71   | 3.07   | 0.0109 | 4.51E-02 |
| 5.29  | 4.38  | 4.76   | 2.71   | 3.07   | 0.0109 | 4.51E-02 |
| 0.011 | 0.012 | 2.43   | 2.75   | 3.34   | 3.79   | 4.52E-02 |
| 3.25  | 2.99  | 2.72   | 2.28   | 0.0105 | 0.0109 | 4.52E-02 |
| 4.41  | 3.4   | 3.19   | 0.0103 | 2.67   | 0.0109 | 4.52E-02 |
| 5.42  | 3.99  | 4.36   | 0.0103 | 3.38   | 0.0109 | 4.52E-02 |
| 5.42  | 3.99  | 4.36   | 0.0103 | 3.38   | 0.0109 | 4.52E-02 |
| 5.41  | 4.37  | 4.56   | 0.0103 | 3.61   | 0.0109 | 4.52E-02 |
| 5.41  | 4.37  | 4.56   | 0.0103 | 3.61   | 0.0109 | 4.52E-02 |
| 4.53  | 4.36  | 4.13   | 3.35   | 0.0105 | 0.0109 | 4.53E-02 |
| 4.58  | 2.84  | 3.38   | 0.0103 | 0.0105 | 2.46   | 4.53E-02 |
| 4.2   | 3.68  | 3.99   | 2.41   | 2.42   | 0.0109 | 4.53E-02 |
| 4.2   | 3.68  | 3.99   | 2.41   | 2.42   | 0.0109 | 4.53E-02 |
| 3.63  | 3.16  | 2.87   | 0.0103 | 0.0105 | 2.43   | 4.53E-02 |
| 2.64  | 3.06  | 2.94   | 2.21   | 0.0105 | 0.0109 | 4.54E-02 |
| 4.19  | 3.68  | 4.07   | 3.06   | 0.0105 | 0.0109 | 4.54E-02 |

|       |       |        |        |        |        |          |
|-------|-------|--------|--------|--------|--------|----------|
| 4.19  | 3.68  | 4.07   | 3.06   | 0.0105 | 0.0109 | 4.54E-02 |
| 3.11  | 3.63  | 3.95   | 0.0103 | 2.69   | 0.0109 | 4.54E-02 |
| 3.11  | 3.63  | 3.95   | 0.0103 | 2.69   | 0.0109 | 4.54E-02 |
| 2.19  | 0.012 | 0.0117 | 2.48   | 3.11   | 3.15   | 4.54E-02 |
| 2.59  | 0.012 | 0.0117 | 3.5    | 3.21   | 3.34   | 4.54E-02 |
| 0.011 | 0.012 | 2.58   | 3.8    | 2.85   | 3.83   | 4.54E-02 |
| 4.91  | 3.99  | 5.13   | 3.47   | 3.6    | 2.3    | 4.54E-02 |
| 4.91  | 3.99  | 5.13   | 3.47   | 3.6    | 2.3    | 4.54E-02 |
| 3.21  | 3.83  | 3.06   | 2.54   | 0.0105 | 0.0109 | 4.54E-02 |
| 3.21  | 3.83  | 3.06   | 2.54   | 0.0105 | 0.0109 | 4.54E-02 |
| 3.51  | 3.19  | 2.67   | 0.0103 | 2.34   | 0.0109 | 4.55E-02 |
| 3.51  | 3.19  | 2.67   | 0.0103 | 2.34   | 0.0109 | 4.55E-02 |
| 5.05  | 4.45  | 4.22   | 0.0103 | 3.49   | 0.0109 | 4.55E-02 |
| 5.05  | 4.45  | 4.22   | 0.0103 | 3.49   | 0.0109 | 4.55E-02 |
| 3.32  | 3.62  | 3.67   | 0.0103 | 2.73   | 0.0109 | 4.55E-02 |
| 3.32  | 3.62  | 3.67   | 0.0103 | 2.73   | 0.0109 | 4.55E-02 |
| 4.63  | 3.28  | 3.36   | 0.0103 | 2.69   | 0.0109 | 4.55E-02 |
| 4.63  | 3.28  | 3.36   | 0.0103 | 2.69   | 0.0109 | 4.55E-02 |
| 4.63  | 3.28  | 3.36   | 0.0103 | 2.69   | 0.0109 | 4.55E-02 |
| 3.23  | 2.68  | 3.14   | 0.0103 | 2.3    | 0.0109 | 4.55E-02 |
| 2.56  | 0.012 | 0.0117 | 3.87   | 3.42   | 2.95   | 4.56E-02 |
| 3.29  | 2.67  | 2.33   | 0.0103 | 2.02   | 0.0109 | 4.56E-02 |
| 3.29  | 2.67  | 2.33   | 0.0103 | 2.02   | 0.0109 | 4.56E-02 |
| 3.27  | 3.03  | 3.84   | 2.55   | 0.0105 | 0.0109 | 4.56E-02 |
| 3.27  | 3.03  | 3.84   | 2.55   | 0.0105 | 0.0109 | 4.56E-02 |
| 4.83  | 3.62  | 4.16   | 0.0103 | 2.65   | 2.26   | 4.56E-02 |
| 0.011 | 0.012 | 2.46   | 3.91   | 3.16   | 2.9    | 4.56E-02 |
| 3.58  | 2.45  | 3.41   | 0.0103 | 2.27   | 0.0109 | 4.56E-02 |
| 0.011 | 2.37  | 0.0117 | 3.3    | 3.6    | 2.66   | 4.57E-02 |
| 3.59  | 3.18  | 3.7    | 0.0103 | 2.68   | 0.0109 | 4.57E-02 |
| 2.36  | 3.31  | 2.97   | 0.0103 | 2.12   | 0.0109 | 4.57E-02 |
| 2.36  | 3.31  | 2.97   | 0.0103 | 2.12   | 0.0109 | 4.57E-02 |
| 4.12  | 3.1   | 3.73   | 0.0103 | 2.73   | 0.0109 | 4.57E-02 |
| 3.71  | 3.22  | 4.01   | 0.0103 | 2.77   | 0.0109 | 4.57E-02 |
| 3.71  | 3.22  | 4.01   | 0.0103 | 2.77   | 0.0109 | 4.57E-02 |
| 4.04  | 4.66  | 3.65   | 0.0103 | 2.38   | 2.52   | 4.57E-02 |
| 4.04  | 4.66  | 3.65   | 0.0103 | 2.38   | 2.52   | 4.57E-02 |
| 0.011 | 0.012 | 2.24   | 2.9    | 3.42   | 2.63   | 4.57E-02 |
| 2.44  | 0.012 | 0.0117 | 3.61   | 3.21   | 2.85   | 4.57E-02 |
| 4.36  | 3.95  | 4.58   | 3.13   | 3.82   | 2.68   | 4.58E-02 |
| 4.36  | 3.95  | 4.58   | 3.13   | 3.82   | 2.68   | 4.58E-02 |
| 3.76  | 4.09  | 4.24   | 3.11   | 0.0105 | 0.0109 | 4.58E-02 |
| 4.28  | 5.32  | 3.94   | 0.0103 | 3.34   | 0.0109 | 4.58E-02 |
| 4.28  | 5.32  | 3.94   | 0.0103 | 3.34   | 0.0109 | 4.58E-02 |
| 4.28  | 5.32  | 3.94   | 0.0103 | 3.34   | 0.0109 | 4.58E-02 |
| 3.29  | 2.9   | 2.65   | 0.0103 | 2.24   | 0.0109 | 4.58E-02 |
| 3.29  | 2.9   | 2.65   | 0.0103 | 2.24   | 0.0109 | 4.58E-02 |
| 5.48  | 4.71  | 4.73   | 2.54   | 4.32   | 2.96   | 4.58E-02 |
| 3.07  | 3.03  | 2.97   | 0.0103 | 2.35   | 0.0109 | 4.59E-02 |
| 3.07  | 3.03  | 2.97   | 0.0103 | 2.35   | 0.0109 | 4.59E-02 |
| 4.6   | 2.73  | 4.13   | 0.0103 | 2.6    | 0.0109 | 4.59E-02 |
| 3.09  | 2.8   | 2.87   | 0.0103 | 2.26   | 0.0109 | 4.59E-02 |
| 3.09  | 2.8   | 2.87   | 0.0103 | 2.26   | 0.0109 | 4.59E-02 |
| 3.44  | 3.06  | 4      | 0.0103 | 2.63   | 0.0109 | 4.59E-02 |
| 3.44  | 3.06  | 4      | 0.0103 | 2.63   | 0.0109 | 4.59E-02 |
| 4.51  | 3.85  | 4.77   | 0.0103 | 3.33   | 0.0109 | 4.59E-02 |
| 3.25  | 2.99  | 2.72   | 0.0103 | 2.29   | 0.0109 | 4.60E-02 |
| 0.011 | 2.19  | 0.0117 | 3      | 2.63   | 2.88   | 4.60E-02 |

|       |       |        |        |        |        |          |
|-------|-------|--------|--------|--------|--------|----------|
| 5.35  | 5.23  | 4.96   | 3.24   | 4.68   | 3.92   | 4.60E-02 |
| 5.35  | 5.23  | 4.96   | 3.24   | 4.68   | 3.92   | 4.60E-02 |
| 5.35  | 5.23  | 4.96   | 3.24   | 4.68   | 3.92   | 4.60E-02 |
| 5.35  | 5.23  | 4.96   | 3.24   | 4.68   | 3.92   | 4.60E-02 |
| 5.35  | 5.23  | 4.96   | 3.24   | 4.68   | 3.92   | 4.60E-02 |
| 5.11  | 4.29  | 4.64   | 0.0103 | 3.59   | 0.0109 | 4.60E-02 |
| 5.11  | 4.29  | 4.64   | 0.0103 | 3.59   | 0.0109 | 4.60E-02 |
| 4.93  | 4.73  | 3.56   | 2.35   | 2.72   | 0.0109 | 4.61E-02 |
| 4.93  | 4.73  | 3.56   | 2.35   | 2.72   | 0.0109 | 4.61E-02 |
| 5.52  | 5.41  | 5.32   | 3.44   | 0.0105 | 3.25   | 4.61E-02 |
| 3.91  | 4.98  | 4.53   | 3.42   | 3.56   | 2.46   | 4.61E-02 |
| 5.74  | 5.8   | 4.41   | 0.0103 | 3.97   | 0.0109 | 4.61E-02 |
| 3.14  | 3.82  | 3.55   | 0.0103 | 2.68   | 0.0109 | 4.61E-02 |
| 3.14  | 3.82  | 3.55   | 0.0103 | 2.68   | 0.0109 | 4.61E-02 |
| 3.64  | 3.87  | 2.76   | 2.52   | 0.0105 | 0.0109 | 4.61E-02 |
| 4.67  | 5.2   | 4.64   | 2.98   | 4.19   | 3.87   | 4.62E-02 |
| 4.67  | 5.2   | 4.64   | 2.98   | 4.19   | 3.87   | 4.62E-02 |
| 4.33  | 4.56  | 3.99   | 2.98   | 3.8    | 2.45   | 4.62E-02 |
| 4.33  | 4.56  | 3.99   | 2.98   | 3.8    | 2.45   | 4.62E-02 |
| 3.32  | 3.16  | 2.97   | 0.0103 | 2.44   | 0.0109 | 4.62E-02 |
| 3.32  | 3.16  | 2.97   | 0.0103 | 2.44   | 0.0109 | 4.62E-02 |
| 4.46  | 4.71  | 4.07   | 3.92   | 2.72   | 3.22   | 4.62E-02 |
| 4.46  | 4.71  | 4.07   | 3.92   | 2.72   | 3.22   | 4.62E-02 |
| 4.54  | 3.87  | 4.34   | 2.45   | 2.72   | 0.0109 | 4.62E-02 |
| 4.85  | 4.96  | 4.74   | 2.66   | 3.28   | 0.0109 | 4.62E-02 |
| 4.85  | 4.96  | 4.74   | 2.66   | 3.28   | 0.0109 | 4.62E-02 |
| 4.85  | 4.96  | 4.74   | 2.66   | 3.28   | 0.0109 | 4.62E-02 |
| 3.88  | 3.19  | 3.09   | 0.0103 | 2.56   | 0.0109 | 4.62E-02 |
| 2.7   | 0.012 | 0.0117 | 3.07   | 3.97   | 3.68   | 4.63E-02 |
| 4.88  | 4.54  | 4.39   | 2.96   | 4.17   | 2.84   | 4.63E-02 |
| 4.88  | 4.54  | 4.39   | 2.96   | 4.17   | 2.84   | 4.63E-02 |
| 5.01  | 3.25  | 3.39   | 0.0103 | 0.0105 | 2.66   | 4.63E-02 |
| 3.24  | 2.71  | 3.03   | 0.0103 | 2.3    | 0.0109 | 4.63E-02 |
| 3.24  | 2.71  | 3.03   | 0.0103 | 2.3    | 0.0109 | 4.63E-02 |
| 3.22  | 3.49  | 4.23   | 2.49   | 2.86   | 2.82   | 4.63E-02 |
| 3.22  | 3.49  | 4.23   | 2.49   | 2.86   | 2.82   | 4.63E-02 |
| 3.57  | 2.82  | 2.97   | 0.0103 | 2.36   | 0.0109 | 4.64E-02 |
| 3.08  | 2.84  | 2.56   | 2.17   | 0.0105 | 0.0109 | 4.64E-02 |
| 3.08  | 2.84  | 2.56   | 2.17   | 0.0105 | 0.0109 | 4.64E-02 |
| 3.55  | 4.06  | 3.91   | 2.08   | 2.58   | 0.0109 | 4.64E-02 |
| 3.62  | 2.89  | 2.86   | 0.0103 | 2.35   | 0.0109 | 4.64E-02 |
| 0.011 | 2.5   | 0.0117 | 3.04   | 3.43   | 3.21   | 4.64E-02 |
| 3.69  | 2.72  | 3.87   | 0.0103 | 2.51   | 0.0109 | 4.64E-02 |
| 3.69  | 2.72  | 3.87   | 0.0103 | 2.51   | 0.0109 | 4.64E-02 |
| 2.85  | 3.21  | 3.31   | 0.0103 | 2.41   | 0.0109 | 4.65E-02 |
| 3.43  | 3.18  | 3.95   | 2.91   | 2.92   | 2.65   | 4.65E-02 |
| 5.03  | 5.12  | 4.06   | 0.0103 | 3.59   | 0.0109 | 4.65E-02 |
| 2.75  | 2.72  | 2.58   | 2.09   | 0.0105 | 0.0109 | 4.65E-02 |
| 3.06  | 3.3   | 2.6    | 0.0103 | 2.27   | 0.0109 | 4.65E-02 |
| 3.06  | 3.3   | 2.6    | 0.0103 | 2.27   | 0.0109 | 4.65E-02 |
| 2.4   | 3.6   | 2.88   | 0.0103 | 2.13   | 0.0109 | 4.65E-02 |
| 4.12  | 4.79  | 3.8    | 0.0103 | 3.22   | 0.0109 | 4.66E-02 |
| 4.12  | 4.79  | 3.8    | 0.0103 | 3.22   | 0.0109 | 4.66E-02 |
| 4.25  | 3.51  | 3.04   | 0.0103 | 2.66   | 0.0109 | 4.66E-02 |
| 3.42  | 2.63  | 3.2    | 2.33   | 0.0105 | 0.0109 | 4.66E-02 |
| 3.42  | 2.63  | 3.2    | 2.33   | 0.0105 | 0.0109 | 4.66E-02 |
| 3.17  | 2.44  | 4.24   | 2.19   | 0.0105 | 0.0109 | 4.66E-02 |
| 3.17  | 2.44  | 4.24   | 2.19   | 0.0105 | 0.0109 | 4.66E-02 |

|       |       |      |        |        |        |          |
|-------|-------|------|--------|--------|--------|----------|
| 3.77  | 3.58  | 2.92 | 0.0103 | 2.59   | 0.0109 | 4.67E-02 |
| 3.54  | 3.12  | 3.84 | 0.0103 | 2.68   | 0.0109 | 4.67E-02 |
| 0.011 | 0.012 | 2.56 | 3.97   | 3.14   | 3.11   | 4.67E-02 |
| 3.59  | 2.84  | 3.34 | 0.0103 | 2.48   | 0.0109 | 4.67E-02 |
| 3.59  | 2.84  | 3.34 | 0.0103 | 2.48   | 0.0109 | 4.67E-02 |
| 3.47  | 2.68  | 3.04 | 0.0103 | 0.0105 | 2.32   | 4.67E-02 |
| 3.47  | 2.68  | 3.04 | 0.0103 | 0.0105 | 2.32   | 4.67E-02 |
| 3.4   | 3.34  | 3.01 | 0.0103 | 2.52   | 0.0109 | 4.67E-02 |
| 3.65  | 3.59  | 4.09 | 2.91   | 3.33   | 3.31   | 4.67E-02 |
| 3.65  | 3.59  | 4.09 | 2.91   | 3.33   | 3.31   | 4.67E-02 |
| 3.85  | 3.1   | 4    | 0.0103 | 2.76   | 0.0109 | 4.67E-02 |
| 3.85  | 3.1   | 4    | 0.0103 | 2.76   | 0.0109 | 4.67E-02 |
| 3.95  | 3.79  | 3.79 | 0.0103 | 3      | 0.0109 | 4.68E-02 |
| 3.95  | 3.79  | 3.79 | 0.0103 | 3      | 0.0109 | 4.68E-02 |
| 3.54  | 3.86  | 2.54 | 0.0103 | 2.38   | 0.0109 | 4.68E-02 |
| 2.89  | 3.34  | 3.32 | 2.46   | 0.0105 | 0.0109 | 4.68E-02 |
| 2.89  | 3.34  | 3.32 | 2.46   | 0.0105 | 0.0109 | 4.68E-02 |
| 3.91  | 4.51  | 3.88 | 2.56   | 0.0105 | 2.44   | 4.69E-02 |
| 2.46  | 2.12  | 2.36 | 2.77   | 2.75   | 3.38   | 4.69E-02 |
| 4.11  | 3.4   | 2.72 | 2.46   | 0.0105 | 0.0109 | 4.69E-02 |
| 2.61  | 3.6   | 3.66 | 0.0103 | 0.0105 | 2.42   | 4.69E-02 |
| 4.61  | 3.92  | 4.98 | 3.43   | 0.0105 | 0.0109 | 4.70E-02 |
| 2.72  | 2.36  | 2.33 | 2.82   | 3.1    | 2.82   | 4.70E-02 |
| 5.13  | 3.34  | 4.86 | 0.0103 | 3.17   | 0.0109 | 4.70E-02 |
| 5.13  | 3.34  | 4.86 | 0.0103 | 3.17   | 0.0109 | 4.70E-02 |
| 2.69  | 4.06  | 3.31 | 0.0103 | 2.42   | 0.0109 | 4.71E-02 |
| 3.7   | 2.69  | 4.45 | 0.0103 | 2.51   | 0.0109 | 4.71E-02 |
| 3.58  | 3.58  | 4.07 | 0.0103 | 0.0105 | 2.9    | 4.71E-02 |
| 2.23  | 2.43  | 2.21 | 2.46   | 2.51   | 2.62   | 4.71E-02 |
| 2.23  | 2.43  | 2.21 | 2.46   | 2.51   | 2.62   | 4.71E-02 |
| 3.92  | 3.29  | 3.8  | 2.83   | 0.0105 | 0.0109 | 4.71E-02 |
| 3.92  | 3.29  | 3.8  | 2.83   | 0.0105 | 0.0109 | 4.71E-02 |
| 0.011 | 0.012 | 2.78 | 3.05   | 4.07   | 4.02   | 4.72E-02 |
| 0.011 | 0.012 | 2.78 | 3.05   | 4.07   | 4.02   | 4.72E-02 |
| 0.011 | 0.012 | 2.78 | 3.05   | 4.07   | 4.02   | 4.72E-02 |
| 5.16  | 3.61  | 5.25 | 2.58   | 3.23   | 3.29   | 4.72E-02 |
| 5.16  | 3.61  | 5.25 | 2.58   | 3.23   | 3.29   | 4.72E-02 |
| 3.5   | 3.68  | 2.92 | 0.0103 | 2.57   | 0.0109 | 4.72E-02 |
| 3.5   | 3.68  | 2.92 | 0.0103 | 2.57   | 0.0109 | 4.72E-02 |
| 4.29  | 4.4   | 4.31 | 2.6    | 0.0105 | 2.78   | 4.72E-02 |
| 2.82  | 2.38  | 3.25 | 0.0103 | 2.11   | 0.0109 | 4.72E-02 |
| 2.82  | 4.6   | 3.21 | 0.0103 | 0.0105 | 2.41   | 4.73E-02 |
| 2.85  | 3.29  | 2.77 | 0.0103 | 2.29   | 0.0109 | 4.73E-02 |
| 2.85  | 3.29  | 2.77 | 0.0103 | 2.29   | 0.0109 | 4.73E-02 |
| 5.15  | 4.06  | 4.83 | 2.68   | 2.94   | 0.0109 | 4.73E-02 |
| 5.15  | 4.06  | 4.83 | 2.68   | 2.94   | 0.0109 | 4.73E-02 |
| 4.27  | 4.83  | 4.38 | 0.0103 | 3.12   | 2.31   | 4.74E-02 |
| 4.27  | 4.83  | 4.38 | 0.0103 | 3.12   | 2.31   | 4.74E-02 |
| 0.011 | 0.012 | 2.03 | 3.28   | 2.39   | 2.55   | 4.74E-02 |
| 4.17  | 2.88  | 4.97 | 2.73   | 0.0105 | 0.0109 | 4.74E-02 |
| 4.36  | 3.15  | 3.05 | 2.54   | 0.0105 | 0.0109 | 4.74E-02 |
| 4.36  | 3.15  | 3.05 | 2.54   | 0.0105 | 0.0109 | 4.74E-02 |
| 2.61  | 2.42  | 3.09 | 0.0103 | 2.06   | 0.0109 | 4.74E-02 |
| 4.96  | 5.35  | 4.49 | 3.73   | 4.11   | 2.62   | 4.74E-02 |
| 4.96  | 5.35  | 4.49 | 3.73   | 4.11   | 2.62   | 4.74E-02 |
| 4.96  | 5.35  | 4.49 | 3.73   | 4.11   | 2.62   | 4.74E-02 |
| 3.23  | 3.38  | 3.69 | 0.0103 | 0.0105 | 2.67   | 4.74E-02 |
| 3.23  | 3.38  | 3.69 | 0.0103 | 0.0105 | 2.67   | 4.74E-02 |

|       |       |        |        |        |        |          |
|-------|-------|--------|--------|--------|--------|----------|
| 3.42  | 3.04  | 3.88   | 0.0103 | 2.63   | 0.0109 | 4.74E-02 |
| 3.42  | 3.04  | 3.88   | 0.0103 | 2.63   | 0.0109 | 4.74E-02 |
| 3.81  | 3.86  | 3.4    | 2.87   | 0.0105 | 0.0109 | 4.75E-02 |
| 4.55  | 3.44  | 4.14   | 0.0103 | 3.06   | 0.0109 | 4.75E-02 |
| 4.55  | 3.44  | 4.14   | 0.0103 | 3.06   | 0.0109 | 4.75E-02 |
| 4.55  | 3.44  | 4.14   | 0.0103 | 3.06   | 0.0109 | 4.75E-02 |
| 4.41  | 5.18  | 4      | 0.0103 | 3.44   | 0.0109 | 4.75E-02 |
| 4.41  | 5.18  | 4      | 0.0103 | 3.44   | 0.0109 | 4.75E-02 |
| 3.77  | 3.22  | 4.53   | 0.0103 | 2.85   | 0.0109 | 4.75E-02 |
| 4.93  | 2.99  | 4.24   | 2.67   | 2.28   | 2.27   | 4.76E-02 |
| 4.41  | 3.08  | 3.55   | 0.0103 | 2.71   | 0.0109 | 4.76E-02 |
| 4.41  | 3.08  | 3.55   | 0.0103 | 2.71   | 0.0109 | 4.76E-02 |
| 3.79  | 2.89  | 2.86   | 0.0103 | 2.37   | 0.0109 | 4.76E-02 |
| 3.07  | 4.16  | 3.3    | 0.0103 | 2.62   | 0.0109 | 4.76E-02 |
| 2.95  | 3.96  | 3.63   | 0.0103 | 2.65   | 0.0109 | 4.76E-02 |
| 2.95  | 3.96  | 3.63   | 0.0103 | 2.65   | 0.0109 | 4.76E-02 |
| 2.95  | 3.96  | 3.63   | 0.0103 | 2.65   | 0.0109 | 4.76E-02 |
| 3.6   | 3.57  | 3.19   | 2.69   | 0.0105 | 0.0109 | 4.76E-02 |
| 3.46  | 3.91  | 4.09   | 2.96   | 0.0105 | 0.0109 | 4.76E-02 |
| 3.26  | 3.68  | 4.09   | 0.0103 | 2.82   | 0.0109 | 4.76E-02 |
| 4.47  | 4.76  | 4.63   | 4.22   | 3.2    | 2.81   | 4.77E-02 |
| 4.47  | 4.76  | 4.63   | 4.22   | 3.2    | 2.81   | 4.77E-02 |
| 0.011 | 2.36  | 0.0117 | 2.73   | 3.23   | 3.19   | 4.77E-02 |
| 4.36  | 3.42  | 3.3    | 0.0103 | 0.0105 | 2.77   | 4.77E-02 |
| 0.011 | 2.58  | 0.0117 | 4.13   | 2.8    | 3.63   | 4.77E-02 |
| 3.82  | 3.19  | 4.04   | 2.25   | 3.08   | 2.75   | 4.77E-02 |
| 2.44  | 2.78  | 2.71   | 2.06   | 0.0105 | 0.0109 | 4.77E-02 |
| 4.18  | 2.94  | 3.91   | 2.24   | 2.59   | 2.76   | 4.78E-02 |
| 3.09  | 2.79  | 2.68   | 0.0103 | 2.22   | 0.0109 | 4.78E-02 |
| 3.09  | 2.79  | 2.68   | 0.0103 | 2.22   | 0.0109 | 4.78E-02 |
| 4.87  | 3.41  | 4.96   | 0.0103 | 3.22   | 0.0109 | 4.78E-02 |
| 4.77  | 4.23  | 4.82   | 0.0103 | 3.09   | 2.54   | 4.78E-02 |
| 3.99  | 3.69  | 3.25   | 0.0103 | 2.81   | 0.0109 | 4.79E-02 |
| 0.011 | 0.012 | 2.73   | 3.22   | 4.23   | 3.4    | 4.80E-02 |
| 0.011 | 0.012 | 2.73   | 3.22   | 4.23   | 3.4    | 4.80E-02 |
| 3.14  | 2.93  | 3.24   | 0.0103 | 2.43   | 0.0109 | 4.80E-02 |
| 0.011 | 0.012 | 2.26   | 2.79   | 3.09   | 2.79   | 4.80E-02 |
| 3.94  | 4.39  | 3.69   | 3.54   | 3.3    | 3.34   | 4.80E-02 |
| 3.94  | 4.39  | 3.69   | 3.54   | 3.3    | 3.34   | 4.80E-02 |
| 3.94  | 4.39  | 3.69   | 3.54   | 3.3    | 3.34   | 4.80E-02 |
| 2.01  | 0.012 | 0.0117 | 2.25   | 2.67   | 3.3    | 4.81E-02 |
| 3.68  | 3.44  | 3.32   | 3.27   | 2.92   | 2.92   | 4.81E-02 |
| 3.68  | 3.44  | 3.32   | 3.27   | 2.92   | 2.92   | 4.81E-02 |
| 3.68  | 3.44  | 3.32   | 3.27   | 2.92   | 2.92   | 4.81E-02 |
| 3.39  | 2.79  | 3.53   | 0.0103 | 2.48   | 0.0109 | 4.81E-02 |
| 3.72  | 3.29  | 4.1    | 2.6    | 3.23   | 2.43   | 4.81E-02 |
| 3.72  | 3.29  | 4.1    | 2.6    | 3.23   | 2.43   | 4.81E-02 |
| 4.89  | 5.08  | 3.19   | 0.0103 | 2.62   | 2.1    | 4.81E-02 |
| 4.76  | 4.11  | 4.87   | 4.01   | 3.86   | 3.8    | 4.81E-02 |
| 4.76  | 4.11  | 4.87   | 4.01   | 3.86   | 3.8    | 4.81E-02 |
| 4.76  | 4.11  | 4.87   | 4.01   | 3.86   | 3.8    | 4.81E-02 |
| 2.92  | 2.82  | 3.46   | 0.0103 | 2.36   | 0.0109 | 4.82E-02 |
| 4.53  | 4.23  | 3.7    | 3.21   | 0.0105 | 0.0109 | 4.82E-02 |
| 3.49  | 2.93  | 4.05   | 0.0103 | 0.0105 | 2.62   | 4.82E-02 |
| 3.49  | 2.93  | 4.05   | 0.0103 | 0.0105 | 2.62   | 4.82E-02 |
| 3.74  | 3.68  | 3.12   | 0.0103 | 2.72   | 0.0109 | 4.82E-02 |
| 3.74  | 3.68  | 3.12   | 0.0103 | 2.72   | 0.0109 | 4.82E-02 |
| 3.51  | 3.11  | 3.75   | 0.0103 | 2.68   | 0.0109 | 4.82E-02 |

|       |       |        |        |        |        |          |
|-------|-------|--------|--------|--------|--------|----------|
| 3.51  | 3.11  | 3.75   | 0.0103 | 2.68   | 0.0109 | 4.82E-02 |
| 3.11  | 3.81  | 3.21   | 0.0103 | 2.6    | 0.0109 | 4.83E-02 |
| 3.11  | 3.81  | 3.21   | 0.0103 | 2.6    | 0.0109 | 4.83E-02 |
| 3.82  | 3.06  | 3.12   | 0.0103 | 0.0105 | 2.55   | 4.83E-02 |
| 3.4   | 3.78  | 3.69   | 0.0103 | 2.84   | 0.0109 | 4.83E-02 |
| 3.4   | 3.78  | 3.69   | 0.0103 | 2.84   | 0.0109 | 4.83E-02 |
| 3.4   | 3.78  | 3.69   | 0.0103 | 2.84   | 0.0109 | 4.83E-02 |
| 4.44  | 3.76  | 4.03   | 2.56   | 0.0105 | 2.45   | 4.83E-02 |
| 4.44  | 3.76  | 4.03   | 2.56   | 0.0105 | 2.45   | 4.83E-02 |
| 2.9   | 2.5   | 2.79   | 0.0103 | 2.13   | 0.0109 | 4.83E-02 |
| 3.66  | 4.42  | 4.51   | 2.51   | 3.65   | 2.6    | 4.84E-02 |
| 3.66  | 4.42  | 4.51   | 2.51   | 3.65   | 2.6    | 4.84E-02 |
| 3.88  | 3.94  | 2.35   | 0.0103 | 2.32   | 0.0109 | 4.84E-02 |
| 3.88  | 3.94  | 2.35   | 0.0103 | 2.32   | 0.0109 | 4.84E-02 |
| 3.88  | 3.94  | 2.35   | 0.0103 | 2.32   | 0.0109 | 4.84E-02 |
| 2.62  | 2.68  | 3.07   | 2.17   | 0.0105 | 0.0109 | 4.84E-02 |
| 2.62  | 2.68  | 3.07   | 2.17   | 0.0105 | 0.0109 | 4.84E-02 |
| 3.55  | 4.3   | 4.02   | 3.34   | 2.82   | 3.35   | 4.84E-02 |
| 3.55  | 4.3   | 4.02   | 3.34   | 2.82   | 3.35   | 4.84E-02 |
| 2.81  | 2.5   | 2.77   | 0.0103 | 2.11   | 0.0109 | 4.85E-02 |
| 0.011 | 0.012 | 2.58   | 2.88   | 4.09   | 3.42   | 4.85E-02 |
| 0.011 | 0.012 | 2.58   | 2.88   | 4.09   | 3.42   | 4.85E-02 |
| 4.49  | 4.34  | 5.14   | 2.26   | 0.0105 | 3.29   | 4.85E-02 |
| 4.49  | 4.34  | 5.14   | 2.26   | 0.0105 | 3.29   | 4.85E-02 |
| 4.81  | 4.03  | 5.17   | 3.58   | 0.0105 | 0.0109 | 4.85E-02 |
| 2.77  | 3.12  | 2.66   | 0.0103 | 0.0105 | 2.22   | 4.85E-02 |
| 2.77  | 3.12  | 2.66   | 0.0103 | 0.0105 | 2.22   | 4.85E-02 |
| 0.011 | 2.48  | 0.0117 | 3.93   | 3.08   | 2.91   | 4.85E-02 |
| 4.45  | 4.42  | 4.88   | 2.82   | 2.87   | 0.0109 | 4.85E-02 |
| 2.82  | 3.98  | 3.17   | 2.47   | 0.0105 | 0.0109 | 4.86E-02 |
| 3.42  | 3.9   | 3.16   | 0.0103 | 0.0105 | 2.7    | 4.86E-02 |
| 3.42  | 3.9   | 3.16   | 0.0103 | 0.0105 | 2.7    | 4.86E-02 |
| 3.34  | 3.24  | 2.98   | 0.0103 | 0.0105 | 2.5    | 4.86E-02 |
| 4.35  | 4.36  | 4.03   | 3.34   | 0.0105 | 0.0109 | 4.86E-02 |
| 4.18  | 4.98  | 5.68   | 2.63   | 0.0105 | 3.19   | 4.87E-02 |
| 4.18  | 4.98  | 5.68   | 2.63   | 0.0105 | 3.19   | 4.87E-02 |
| 4.44  | 3.71  | 3.14   | 0.0103 | 2.81   | 0.0109 | 4.87E-02 |
| 4.44  | 3.71  | 3.14   | 0.0103 | 2.81   | 0.0109 | 4.87E-02 |
| 4.44  | 3.71  | 3.14   | 0.0103 | 2.81   | 0.0109 | 4.87E-02 |
| 4.04  | 4.08  | 4.03   | 2.32   | 2.72   | 0.0109 | 4.87E-02 |
| 3.63  | 2.62  | 3.05   | 0.0103 | 2.33   | 0.0109 | 4.87E-02 |
| 3.63  | 2.62  | 3.05   | 0.0103 | 2.33   | 0.0109 | 4.87E-02 |
| 2.74  | 2.52  | 2.66   | 2.08   | 0.0105 | 0.0109 | 4.88E-02 |
| 4.35  | 2.96  | 3.66   | 0.0103 | 2.7    | 0.0109 | 4.88E-02 |
| 4.35  | 2.96  | 3.66   | 0.0103 | 2.7    | 0.0109 | 4.88E-02 |
| 4.35  | 2.96  | 3.66   | 0.0103 | 2.7    | 0.0109 | 4.88E-02 |
| 2.21  | 0.012 | 0.0117 | 2.58   | 2.84   | 3.09   | 4.88E-02 |
| 3.56  | 3.28  | 3.61   | 0.0103 | 2.74   | 0.0109 | 4.88E-02 |
| 3.83  | 2.42  | 4.04   | 0.0103 | 2.38   | 0.0109 | 4.89E-02 |
| 3.83  | 2.42  | 4.04   | 0.0103 | 2.38   | 0.0109 | 4.89E-02 |
| 0.011 | 0.012 | 2.09   | 2.4    | 3.36   | 2.65   | 4.89E-02 |
| 3.74  | 3.8   | 4.19   | 0.0103 | 3.07   | 0.0109 | 4.90E-02 |
| 2.745 | 2.53  | 3.26   | 0.0103 | 0.0105 | 2.18   | 4.90E-02 |
| 4.63  | 5.26  | 5.45   | 3.87   | 4.05   | 2.29   | 4.90E-02 |
| 2.6   | 3.35  | 3.53   | 2.39   | 0.0105 | 0.0109 | 4.90E-02 |
| 2.6   | 3.35  | 3.53   | 2.39   | 0.0105 | 0.0109 | 4.90E-02 |
| 2.6   | 3.35  | 3.53   | 2.39   | 0.0105 | 0.0109 | 4.90E-02 |
| 3.41  | 3.52  | 3.84   | 0.0103 | 2.82   | 0.0109 | 4.90E-02 |

|       |       |        |        |        |        |          |
|-------|-------|--------|--------|--------|--------|----------|
| 3.41  | 3.52  | 3.84   | 0.0103 | 2.82   | 0.0109 | 4.90E-02 |
| 3.46  | 3.11  | 2.48   | 0.0103 | 0.0105 | 2.27   | 4.90E-02 |
| 3.46  | 3.11  | 2.48   | 0.0103 | 0.0105 | 2.27   | 4.90E-02 |
| 3.54  | 4.67  | 3.65   | 2.06   | 2.57   | 0.0109 | 4.90E-02 |
| 3.54  | 4.67  | 3.65   | 2.06   | 2.57   | 0.0109 | 4.90E-02 |
| 4.5   | 3.68  | 4.22   | 3.21   | 0.0105 | 0.0109 | 4.90E-02 |
| 3.63  | 3.75  | 3.96   | 0.0103 | 2.98   | 0.0109 | 4.91E-02 |
| 3.63  | 3.75  | 3.96   | 0.0103 | 2.98   | 0.0109 | 4.91E-02 |
| 3.18  | 2.74  | 2.52   | 0.0103 | 2.17   | 0.0109 | 4.91E-02 |
| 2.71  | 3.11  | 2.64   | 0.0103 | 2.2    | 0.0109 | 4.91E-02 |
| 2.71  | 3.11  | 2.64   | 0.0103 | 2.2    | 0.0109 | 4.91E-02 |
| 4.57  | 4.27  | 4.82   | 2.26   | 4.04   | 2.56   | 4.91E-02 |
| 3.18  | 2.83  | 4.2    | 0.0103 | 2.48   | 0.0109 | 4.92E-02 |
| 3.65  | 4.36  | 2.52   | 0.0103 | 2.42   | 0.0109 | 4.92E-02 |
| 3.65  | 4.36  | 2.52   | 0.0103 | 2.42   | 0.0109 | 4.92E-02 |
| 4.12  | 4.62  | 2.9    | 2.78   | 0.0105 | 0.0109 | 4.92E-02 |
| 2.72  | 3.27  | 3.28   | 2.4    | 0.0105 | 0.0109 | 4.92E-02 |
| 2.88  | 3.65  | 3.83   | 0.0103 | 2.63   | 0.0109 | 4.92E-02 |
| 3.91  | 3.28  | 2.81   | 2.51   | 0.0105 | 0.0109 | 4.93E-02 |
| 3.68  | 3.65  | 4.21   | 0.0103 | 3.01   | 0.0109 | 4.93E-02 |
| 3.68  | 3.65  | 4.21   | 0.0103 | 3.01   | 0.0109 | 4.93E-02 |
| 3.47  | 2.98  | 3.27   | 0.0103 | 2.54   | 0.0109 | 4.93E-02 |
| 4.64  | 3.7   | 4.38   | 0.0103 | 3.28   | 0.0109 | 4.93E-02 |
| 4.81  | 2.91  | 3.44   | 2.57   | 0.0105 | 0.0109 | 4.93E-02 |
| 2.52  | 2.79  | 3.03   | 0.0103 | 2.17   | 0.0109 | 4.93E-02 |
| 2.52  | 2.79  | 3.03   | 0.0103 | 2.17   | 0.0109 | 4.93E-02 |
| 2.99  | 3.51  | 3.09   | 0.0103 | 2.5    | 0.0109 | 4.94E-02 |
| 2.99  | 3.51  | 3.09   | 0.0103 | 2.5    | 0.0109 | 4.94E-02 |
| 3.56  | 2.79  | 2.26   | 2.06   | 0.0105 | 0.0109 | 4.94E-02 |
| 5.24  | 4.14  | 4.67   | 0.0103 | 3.62   | 0.0109 | 4.94E-02 |
| 3.58  | 3.7   | 3      | 0.0103 | 2.66   | 0.0109 | 4.95E-02 |
| 3.58  | 3.7   | 3      | 0.0103 | 2.66   | 0.0109 | 4.95E-02 |
| 2.91  | 4.43  | 4.93   | 0.0103 | 2.85   | 0.0109 | 4.95E-02 |
| 2.87  | 4.18  | 3.48   | 2.61   | 0.0105 | 0.0109 | 4.96E-02 |
| 4.3   | 3.06  | 3.21   | 2.61   | 0.0105 | 0.0109 | 4.96E-02 |
| 4.06  | 3.01  | 3.48   | 0.0103 | 2.68   | 0.0109 | 4.97E-02 |
| 3.59  | 2.42  | 2.6    | 0.0103 | 0.0105 | 2.08   | 4.97E-02 |
| 3.59  | 2.42  | 2.6    | 0.0103 | 0.0105 | 2.08   | 4.97E-02 |
| 3.1   | 3.29  | 3.22   | 3.36   | 3.69   | 3.85   | 4.97E-02 |
| 4.24  | 3.66  | 3.29   | 3.04   | 2.64   | 2.98   | 4.98E-02 |
| 4.24  | 3.66  | 3.29   | 3.04   | 2.64   | 2.98   | 4.98E-02 |
| 0.011 | 0.012 | 2.25   | 3.81   | 3.23   | 2.37   | 4.98E-02 |
| 3.78  | 3.21  | 3.28   | 2.68   | 0.0105 | 0.0109 | 4.98E-02 |
| 5.97  | 4.31  | 5.19   | 2.28   | 3.59   | 0.0109 | 4.99E-02 |
| 3.36  | 2.99  | 3.67   | 2.38   | 2.95   | 2.51   | 4.99E-02 |
| 0.011 | 0.012 | 2.46   | 2.89   | 3.1    | 4.51   | 4.99E-02 |
| 0.011 | 0.012 | 2.46   | 2.89   | 3.1    | 4.51   | 4.99E-02 |
| 2.76  | 0.012 | 0.0117 | 3.5    | 3.23   | 3.82   | 4.99E-02 |
| 2.76  | 0.012 | 0.0117 | 3.5    | 3.23   | 3.82   | 4.99E-02 |
| 2.58  | 3.12  | 2.93   | 0.0103 | 2.25   | 0.0109 | 4.99E-02 |
| 2.58  | 3.12  | 2.93   | 0.0103 | 2.25   | 0.0109 | 4.99E-02 |
| 4.34  | 4.5   | 4.53   | 3.05   | 4.14   | 2.92   | 5.00E-02 |
| 4.34  | 4.5   | 4.53   | 3.05   | 4.14   | 2.92   | 5.00E-02 |
| 3.77  | 2.66  | 4.15   | 0.0103 | 2.56   | 0.0109 | 5.00E-02 |
| 3.77  | 2.66  | 4.15   | 0.0103 | 2.56   | 0.0109 | 5.00E-02 |
| 3.42  | 3.26  | 4.43   | 0.0103 | 2.79   | 0.0109 | 5.00E-02 |
| 3.42  | 3.26  | 4.43   | 0.0103 | 2.79   | 0.0109 | 5.00E-02 |
| 3.03  | 3.16  | 3.73   | 2.57   | 0.0105 | 0.0109 | 5.00E-02 |

0.011

0.012

2.46

3.1

2.94

4.71

5.00E-02



| fold-<br>change(Astro/Nanog<br>) | log2(fold-change) | ..peak count / window and probe |                           |                        |                        |
|----------------------------------|-------------------|---------------------------------|---------------------------|------------------------|------------------------|
|                                  |                   | up_gene_descri<br>ption         | down_gene_sy<br>mbol      | up_gene_acc            | down_gene_acc          |
| 3.09E+02                         | 8.27E+00          | scribbled homolc                | poly-U binding s†         | NM_182706,NM_001136033 | NM_182706,NM_015356    |
| 3.09E+02                         | 8.27E+00          | poly-U binding s†               | poly-U binding s†         | NM_001136033           | NM_001136033           |
| 3.09E+02                         | 8.27E+00          | poly-U binding s†               | poly-U binding s†         | NM_001136033           | NM_001136033           |
| 2.70E+02                         | 8.08E+00          | death inducer-ot                | death inducer-ot          | NM_022105,NM_005338    | NM_022105,NM_080796    |
| 2.70E+02                         | 8.08E+00          | death inducer-ot                | death inducer-ot          | NM_022105,NM_005338    | NM_022105,NM_080796    |
| 2.28E+02                         | 7.83E+00          | huntingtin intera               | huntingtin intera         | NM_005338              | NM_005338              |
| 2.28E+02                         | 7.83E+00          | huntingtin intera               | huntingtin intera         | NM_005338              | NM_005338              |
| 2.53E+02                         | 7.98E+00          | mitogen-activate                | mitogen-activate          | NM_015133,NM_001040439 | NM_015133,NM_001040439 |
| 2.53E+02                         | 7.98E+00          | mitogen-activate                | mitogen-activate          | NM_015133,NM_001040439 | NM_015133,NM_001040439 |
| 2.40E+02                         | 7.91E+00          | dual specificity p              | dual specificity p        | NM_001003892           | NM_001003892           |
| 3.17E+02                         | 8.31E+00          | PR domain conta                 | PR domain conta           | NM_199454,NM_022114    | NM_199454,NM_022114    |
| 3.90E+02                         | 8.61E+00          | ---                             | sodium channel, NR_027361 | NR_027361              | NR_027361              |
| 2.85E+02                         | 8.15E+00          | hypothetical pro                | hypothetical pro          | NR_024607              | NR_024607              |
| 4.77E+02                         | 8.90E+00          | CTD (carboxy-ter                | CTD (carboxy-ter          | NM_048368,NM_004715    | NM_048368,NM_004715    |
| 4.77E+02                         | 8.90E+00          | CTD (carboxy-ter                | CTD (carboxy-ter          | NM_048368,NM_004715    | NM_048368,NM_004715    |
| 2.38E+02                         | 7.90E+00          | elongation of ver               | elongation of ver         | NM_017770              | NM_017770              |
| 2.34E+02                         | 7.87E+00          | cystin 1                        | cystin 1                  | NM_001037160           | NM_001037160           |
| 2.30E+02                         | 7.84E+00          | unkempt homolc                  | unkempt homolc            | NM_023076              | NM_023076              |
| 2.30E+02                         | 7.84E+00          | unkempt homolc                  | unkempt homolc            | NM_023076              | NM_023076              |
| 2.50E+02                         | 7.97E+00          | solute carrier fan              | solute carrier fan        | NM_182632              | NM_182632              |
| 2.36E+02                         | 7.88E+00          | WD repeat domz                  | zinc and ring fing        | NM_030581              | NM_030581              |
| 2.36E+02                         | 7.88E+00          | SPO11 meiotic p†                | RAE1 RNA expor†           | NM_012444,NM_198265    | NM_012444,NM_198265    |
| 2.65E+02                         | 8.05E+00          | presenilin 1                    | papilin, proteogh         | NM_000021,NM_007318    | NM_000021,NM_007318    |
| 2.65E+02                         | 8.05E+00          | papilin, proteogh               | papilin, proteogh         | NM_173462              | NM_173462              |
| 2.56E+02                         | 8.00E+00          | melanoma antig†                 | melanoma antig†           | NM_004988              | NM_004988              |
| 4.08E+02                         | 8.67E+00          | Lck interacting tr              | Lck interacting tr        | NM_017806              | NM_017806              |
| 3.85E+02                         | 8.59E+00          | kinesin family m†               | chromosome 14             | NM_015656              | NM_015656              |
| 2.90E+02                         | 8.18E+00          | short stature hor               | cytokine recepto          | NM_006883,NM_000451    | NM_006883,NM_000451    |
| 3.93E+02                         | 8.62E+00          | transmembrane                   | LIM domain bind           | NM_153365              | NM_153365              |
| 3.80E+02                         | 8.57E+00          | unkempt homolc                  | unkempt homolc            | NM_023076              | NM_023076              |
| 3.80E+02                         | 8.57E+00          | unkempt homolc                  | unkempt homolc            | NM_023076              | NM_023076              |
| 3.80E+02                         | 8.57E+00          | unkempt homolc                  | unkempt homolc            | NM_023076              | NM_023076              |
| 3.80E+02                         | 8.57E+00          | unkempt homolc                  | unkempt homolc            | NM_023076              | NM_023076              |
| 3.35E+02                         | 8.39E+00          | solute carrier fan              | solute carrier fan        | NM_152346              | NM_152346              |
| 4.35E-03                         | -7.84E+00         | FERM domain co                  | FERM domain co            | NM_018027              | NM_018027              |
| 4.35E-03                         | -7.84E+00         | FERM domain co                  | FERM domain co            | NM_018027              | NM_018027              |
| 2.55E+02                         | 8.00E+00          | FERM and PDZ d†                 | RNA (guanine-9-)          | NM_014907              | NM_014907              |
| 2.55E+02                         | 8.00E+00          | FERM and PDZ d†                 | RNA (guanine-9-)          | NM_014907              | NM_014907              |
| 4.62E+02                         | 8.85E+00          | hypothetical pro                | hypothetical pro          | NR_024609              | NR_024609              |
| 3.16E+02                         | 8.30E+00          | hexosaminidase                  | hexosaminidase            | NM_173620              | NM_173620              |
| 3.16E+02                         | 8.30E+00          | hexosaminidase                  | hexosaminidase            | NM_173620              | NM_173620              |
| 3.16E+02                         | 8.30E+00          | hexosaminidase                  | hexosaminidase            | NM_173620              | NM_173620              |
| 2.85E+02                         | 8.15E+00          | tubulin tyrosine I              | tubulin tyrosine I        | NM_015140              | NM_015140              |
| 2.85E+02                         | 8.15E+00          | tubulin tyrosine I              | tubulin tyrosine I        | NM_015140              | NM_015140              |
| 2.85E+02                         | 8.15E+00          | tubulin tyrosine I              | tubulin tyrosine I        | NM_015140              | NM_015140              |
| 2.13E+02                         | 7.74E+00          | ovarian tumor su                | hypermethylatec           | NM_080822              | NM_080822              |
| 2.13E+02                         | 7.74E+00          | ovarian tumor su                | hypermethylatec           | NM_080822              | NM_080822              |
| 2.39E+02                         | 7.90E+00          | LIM homeobox 2                  | LIM homeobox 2            | NM_004789              | NM_004789              |
| 2.39E+02                         | 7.90E+00          | LIM homeobox 2                  | LIM homeobox 2            | NM_004789              | NM_004789              |
| 2.24E+02                         | 7.81E+00          | CREB binding prc                | CREB binding prc          | NM_001079846,NM_004380 | NM_001079846,NM_004380 |
| 2.22E+02                         | 7.79E+00          | CDC42 binding p†                | chromosome 14             | NM_006035              | NM_006035              |
| 2.22E+02                         | 7.79E+00          | CDC42 binding p†                | chromosome 14             | NM_006035              | NM_006035              |
| 2.53E+02                         | 7.98E+00          | mindbomb homc                   | mindbomb homc             | NM_080875              | NM_080875              |
| 2.53E+02                         | 7.98E+00          | mindbomb homc                   | mindbomb homc             | NM_080875              | NM_080875              |

|          |           |                                           |                              |                                          |                                          |
|----------|-----------|-------------------------------------------|------------------------------|------------------------------------------|------------------------------------------|
| 2.97E+02 | 8.22E+00  | src-related kinase                        | chromosome 20                | NM_080823                                | NM_080823                                |
| 2.85E+02 | 8.15E+00  | phosphatidylinositol phosphatidylinositol |                              | NM_033198                                | NM_033198                                |
| 2.85E+02 | 8.15E+00  | phosphatidylinositol phosphatidylinositol |                              | NM_033198                                | NM_033198                                |
| 2.14E+02 | 7.74E+00  | fibroblast growth factor                  | fibroblast growth factor     | NM_005247                                | NM_005247                                |
| 2.14E+02 | 7.74E+00  | fibroblast growth factor                  | fibroblast growth factor     | NM_005247                                | NM_005247                                |
| 4.27E-03 | -7.87E+00 | ubiquitin B                               | transient receptor           | NM_018955                                | NM_018955                                |
| 4.27E-03 | -7.87E+00 | ubiquitin B                               | transient receptor           | NM_018955                                | NM_018955                                |
| 2.90E+02 | 8.18E+00  | pregnancy specific                        | pregnancy specific           | NM_002781,NM_002781,NM_001130014         | NM_002781,NM_002781,NM_001130014         |
| 2.90E+02 | 8.18E+00  | pregnancy specific                        | pregnancy specific           | NM_002781,NM_002781,NM_001130014         | NM_002781,NM_002781,NM_001130014         |
| 4.85E-03 | -7.69E+00 | aldehyde dehydrogenase                    | leucine-rich repeat          | NM_000693                                | NM_000693                                |
| 4.85E-03 | -7.69E+00 | aldehyde dehydrogenase                    | leucine-rich repeat          | NM_000693                                | NM_000693                                |
| 2.39E+02 | 7.90E+00  | carbohydrate                              | (chain) carbohydrate (chain) | NM_004273                                | NM_004273                                |
| 3.32E+02 | 8.38E+00  | solute carrier                            | fan solute carrier           | NM_025257                                | NM_025257                                |
| 4.14E+02 | 8.69E+00  | transcription factor                      | transcription factor         | NM_001136139, NM_001136139, NM_003200    | NM_001136139, NM_001136139, NM_003200    |
| 4.14E+02 | 8.69E+00  | transcription factor                      | transcription factor         | NM_001136139, NM_001136139, NM_003200    | NM_001136139, NM_001136139, NM_003200    |
| 2.51E+02 | 7.97E+00  | CASK interacting                          | CASK interacting             | NM_001142643, NM_001142643, NM_020753    | NM_001142643, NM_001142643, NM_020753    |
| 2.51E+02 | 7.97E+00  | CASK interacting                          | CASK interacting             | NM_001142643, NM_001142643, NM_020753    | NM_001142643, NM_001142643, NM_020753    |
| 2.30E+02 | 7.85E+00  | small optic lobes                         | chromosome 16                | NM_005632                                | NM_005632                                |
| 2.30E+02 | 7.85E+00  | chromosome 16                             | chromosome 16                | NM_145270                                | NM_145270                                |
| 2.26E+02 | 7.82E+00  | cadherin 18, type I                       | glucuronidase, beta          | NM_004934                                | NM_004934                                |
| 2.31E+02 | 7.85E+00  | phospholipase C                           | , chromosome 15              | NM_004573                                | NM_004573                                |
| 2.58E+02 | 8.01E+00  | matrix metalloproteinase                  | matrix metalloproteinase     | NM_002428                                | NM_002428                                |
| 2.58E+02 | 8.01E+00  | matrix metalloproteinase                  | matrix metalloproteinase     | NM_002428                                | NM_002428                                |
| 2.23E+02 | 7.80E+00  | RUN and FYVE domain                       | RUN and FYVE domain          | NM_001040452, NM_001040452, NM_001040451 | NM_001040452, NM_001040452, NM_001040451 |
| 2.23E+02 | 7.80E+00  | RUN and FYVE domain                       | RUN and FYVE domain          | NM_001040452, NM_001040452, NM_001040451 | NM_001040452, NM_001040452, NM_001040451 |
| 2.34E+02 | 7.87E+00  | nuclear receptor                          | FSHD region gene             | NR_003678                                | NR_003678                                |
| 2.34E+02 | 7.87E+00  | nuclear receptor                          | FSHD region gene             | NR_003678                                | NR_003678                                |
| 3.50E-03 | -8.16E+00 | chromosome 14                             | chromosome 14                | NM_174913                                | NM_174913                                |
| 2.15E+02 | 7.75E+00  | metastasis associated                     | metastasis associated        | NM_004689                                | NM_004689                                |
| 2.15E+02 | 7.75E+00  | metastasis associated                     | metastasis associated        | NM_004689                                | NM_004689                                |
| 2.76E+02 | 8.11E+00  | IgLON family member                       | IgLON family member          | NM_001101372                             | NM_001101372                             |
| 2.76E+02 | 8.11E+00  | IgLON family member                       | IgLON family member          | NM_001101372                             | NM_001101372                             |
| 2.76E+02 | 8.11E+00  | chromosome 20                             | cadherin 4, type I           | NM_173644                                | NM_173644                                |
| 2.76E+02 | 8.11E+00  | chromosome 20                             | cadherin 4, type I           | NM_173644                                | NM_173644                                |
| 2.09E+02 | 7.70E+00  | olfactory receptor                        | folate hydrolase             | NM_001005512                             | NM_001005512                             |
| 2.09E+02 | 7.70E+00  | olfactory receptor                        | folate hydrolase             | NM_001005512                             | NM_001005512                             |
| 3.25E+02 | 8.34E+00  | CDC42 binding protein                     | zinc finger protein          | NM_014826,NM_014826,NM_003607            | NM_014826,NM_014826,NM_003607            |
| 3.25E+02 | 8.34E+00  | CDC42 binding protein                     | zinc finger protein          | NM_014826,NM_014826,NM_003607            | NM_014826,NM_014826,NM_003607            |
| 3.25E+02 | 8.34E+00  | CDC42 binding protein                     | zinc finger protein          | NM_014826,NM_014826,NM_003607            | NM_014826,NM_014826,NM_003607            |
| 2.63E+02 | 8.04E+00  | chromosome 2                              | o hypothetical LOC           | NM_173821                                | NM_173821                                |
| 2.63E+02 | 8.04E+00  | chromosome 2                              | o hypothetical LOC           | NM_173821                                | NM_173821                                |
| 2.73E+02 | 8.09E+00  | major facilitator                         | major facilitator            | NM_001146069, NM_001146069, NM_001120    | NM_001146069, NM_001146069, NM_001120    |
| 3.71E+02 | 8.54E+00  | fms-related tyrosine                      | fms-related tyrosine         | NM_002020                                | NM_002020                                |
| 3.05E+02 | 8.25E+00  | zinc finger protein                       | zinc finger protein          | NM_033273                                | NM_033273                                |
| 3.81E-03 | -8.04E+00 | hypothetical LOC                          | family with sequence         | NR_024397                                | NR_024397                                |
| 4.07E+02 | 8.67E+00  | transmembrane                             | transmembrane                | NM_024600                                | NM_024600                                |
| 2.30E+02 | 7.84E+00  | protein tyrosine                          | protein tyrosine             | NM_130842,NM_130842,NM_130843,NM_002     | NM_130842,NM_130842,NM_130843,NM_002     |
| 2.30E+02 | 7.84E+00  | protein tyrosine                          | protein tyrosine             | NM_130842,NM_130842,NM_130843,NM_002     | NM_130842,NM_130842,NM_130843,NM_002     |
| 2.52E+02 | 7.98E+00  | kinase non-catalytic                      | kinase non-catalytic         | NM_152643                                | NM_152643                                |
| 2.17E+02 | 7.76E+00  | autocrine motility                        | autocrine motility           | NM_001144                                | NM_001144                                |
| 3.83E+02 | 8.58E+00  | NLR family, pyrin                         | ATH1, acid trehalase         | NM_138329                                | NM_138329                                |
| 3.83E+02 | 8.58E+00  | ATH1, acid trehalase                      | ATH1, acid trehalase         | NM_025092                                | NM_025092                                |
| 3.83E+02 | 8.58E+00  | ATH1, acid trehalase                      | ATH1, acid trehalase         | NM_025092                                | NM_025092                                |
| 2.79E-03 | -8.49E+00 | GRB2-related adapter                      | GRB2-related adapter         | NM_006613                                | NM_006613                                |
| 3.31E+02 | 8.37E+00  | inositol monophosphate                    | chromosome 8                 | o NM_017813                              | NM_017813                                |
| 2.30E+02 | 7.84E+00  | neurotensin receptor                      | neurotensin receptor         | NM_002531                                | NM_002531                                |
| 2.02E+02 | 7.66E+00  | zinc finger protein                       | zinc finger protein          | NM_001130022                             | NM_001130022                             |
| 2.63E+02 | 8.04E+00  | BH3 interacting                           | chromosome 8                 | o NM_001196,NM_001196,NM_197967,NM_197   | NM_001196,NM_001196,NM_197967,NM_197     |

|          |           |                     |                     |                                       |                            |
|----------|-----------|---------------------|---------------------|---------------------------------------|----------------------------|
| 2.63E+02 | 8.04E+00  | BH3 interacting c   | BH3 interacting c   | NM_001196,NM                          | NM_001196,NM_197967,NM_197 |
| 2.44E+02 | 7.93E+00  | poly(A) binding p   | poly(A) binding p   | NM_002568                             | NM_002568                  |
| 2.44E+02 | 7.93E+00  | poly(A) binding p   | poly(A) binding p   | NM_002568                             | NM_002568                  |
| 3.14E+02 | 8.30E+00  | KIAA0664            | KIAA0664            | NM_015229                             | NM_015229                  |
| 2.19E+02 | 7.78E+00  | tyrosylprotein su   | tyrosylprotein su   | NM_003595,NM                          | NM_003595,NM_001008566     |
| 4.25E-03 | -7.88E+00 | triple functional f | family with sequ    | NM_007118                             | NM_007118                  |
| 4.25E-03 | -7.88E+00 | triple functional f | family with sequ    | NM_007118                             | NM_007118                  |
| 3.44E+02 | 8.43E+00  | family with sequ    | family with sequ    | NM_145253                             | NM_145253                  |
| 3.44E+02 | 8.43E+00  | family with sequ    | family with sequ    | NM_145253                             | NM_145253                  |
| 2.22E+02 | 7.79E+00  | chaperonin cont     | hypothetical LOC    | NM_001029866                          | NM_001029866               |
| 4.64E-03 | -7.75E+00 | chromosome 14       | pellino homolog     | NR_026797,NR_                         | (NR_026797,NR_026796       |
| 3.85E+02 | 8.59E+00  | forkhead box K1     | forkhead box K1     | NM_001037165                          | NM_001037165               |
| 3.85E+02 | 8.59E+00  | forkhead box K1     | forkhead box K1     | NM_001037165                          | NM_001037165               |
| 2.79E+02 | 8.12E+00  | complement con      | complement con      | NM_000606                             | NM_000606                  |
| 2.14E+02 | 7.74E+00  | UTP6, small sub     | suppressor of ze    | NM_018428                             | NM_018428                  |
| 4.88E-03 | -7.68E+00 | WD repeat dom       | WD repeat dom       | NM_015131                             | NM_015131                  |
| 4.88E-03 | -7.68E+00 | small nucleolar R   | small nucleolar R   | NR_003074                             | NR_003074                  |
| 3.63E-03 | -8.10E+00 | dynein, axonem      | dynein, axonem      | NM_023036                             | NM_023036                  |
| 4.45E-03 | -7.81E+00 | solute carrier fan  | solute carrier fan  | NM_003055                             | NM_003055                  |
| 2.95E+02 | 8.21E+00  | goosecoid home      | dicer 1, ribonucl   | NM_173849                             | NM_173849                  |
| 2.29E+02 | 7.84E+00  | SH3 and multiple    | C-type lectin don   | NM_016148                             | NM_016148                  |
| 2.29E+02 | 7.84E+00  | SH3 and multiple    | C-type lectin don   | NM_016148                             | NM_016148                  |
| 4.37E-03 | -7.84E+00 | ubiquitin specific  | Thy-1 cell surfac   | NM_171997,NM                          | NM_171997,NM_004205        |
| 2.03E+02 | 7.66E+00  | trinucleotide rep   | trinucleotide rep   | NM_001080495                          | NM_001080495               |
| 2.03E+02 | 7.66E+00  | trinucleotide rep   | trinucleotide rep   | NM_001080495                          | NM_001080495               |
| 2.21E+02 | 7.79E+00  | oncomodulin         | oncomodulin         | NM_001097622                          | NM_001097622               |
| 2.45E+02 | 7.94E+00  | GLI family zinc fir | zinc finger protei  | NM_138465                             | NM_138465                  |
| 2.86E+02 | 8.16E+00  | EPH receptor B4     | EPH receptor B4     | NM_004444                             | NM_004444                  |
| 2.86E+02 | 8.16E+00  | EPH receptor B4     | EPH receptor B4     | NM_004444                             | NM_004444                  |
| 2.84E+02 | 8.15E+00  | espin pseudogen     | espin pseudogen     | NR_026567                             | NR_026567                  |
| 2.84E+02 | 8.15E+00  | espin pseudogen     | espin pseudogen     | NR_026567                             | NR_026567                  |
| 3.30E+02 | 8.37E+00  | zinc finger protei  | coiled-coil doma    | NM_020787                             | NM_020787                  |
| 4.02E-03 | -7.96E+00 | pleckstrin homol    | leucine rich repe   | NR_024386                             | NR_024386                  |
| 2.75E+02 | 8.10E+00  | adenylate cyclas    | adenylate cyclas    | NM_001116                             | NM_001116                  |
| 2.34E+02 | 7.87E+00  | caspase recruitm    | caspase recruitm    | NM_032415                             | NM_032415                  |
| 2.77E+02 | 8.11E+00  | mucin 5AC, oligo    | mucin 5AC, oligo    | NM_017511                             | NM_017511                  |
| 2.77E+02 | 8.11E+00  | mucin 5AC, oligo    | mucin 5AC, oligo    | NM_017511                             | NM_017511                  |
| 2.35E+02 | 7.88E+00  | tripartite motif-c  | tripartite motif-c  | NM_001136486                          | NM_001136486               |
| 2.73E+02 | 8.09E+00  | glycoprotein VI (j  | glycoprotein VI (j  | NM_001083899, NM_001083899, NM_016363 |                            |
| 2.73E+02 | 8.09E+00  | glycoprotein VI (j  | glycoprotein VI (j  | NM_001083899, NM_001083899, NM_016363 |                            |
| 2.70E+02 | 8.07E+00  | apolipoprotein D    | succinate dehydr    | NM_001647                             | NM_001647                  |
| 2.70E+02 | 8.07E+00  | apolipoprotein D    | succinate dehydr    | NM_001647                             | NM_001647                  |
| 2.77E+02 | 8.11E+00  | scavenger recept    | scavenger recept    | NM_001144950                          | NM_001144950               |
| 2.77E+02 | 8.11E+00  | scavenger recept    | scavenger recept    | NM_001144950                          | NM_001144950               |
| 2.77E+02 | 8.11E+00  | scavenger recept    | scavenger recept    | NM_001144950                          | NM_001144950               |
| 2.65E+02 | 8.05E+00  | myosin binding p    | myosin binding p    | NM_004533                             | NM_004533                  |
| 2.65E+02 | 8.05E+00  | myosin binding p    | myosin binding p    | NM_004533                             | NM_004533                  |
| 2.08E+02 | 7.70E+00  | chromosome 22       | chromosome 22       | NM_001123225                          | NM_001123225               |
| 3.05E+02 | 8.25E+00  | WW domain con       | WW domain con       | NM_199423,NM                          | NM_199423,NM_007014        |
| 3.71E+02 | 8.54E+00  | solute carrier fan  | ret finger proteir  | NM_014227                             | NM_014227                  |
| 3.74E-03 | -8.06E+00 | sterol-C5-desatu    | sortilin-related re | NM_001024956                          | NM_001024956               |
| 3.61E+02 | 8.50E+00  | adenosine mono      | adenosine mono      | NM_203404                             | NM_203404                  |
| 3.64E-03 | -8.10E+00 | transmembrane       | ADAMTS-like 2       | NM_001080483                          | NM_001080483               |
| 3.64E-03 | -8.10E+00 | transmembrane       | ADAMTS-like 2       | NM_001080483                          | NM_001080483               |
| 2.29E+02 | 7.84E+00  | neuroblastoma b     | hypothetical FLJ    | NM_001101663                          | NM_001101663               |
| 2.37E+02 | 7.89E+00  | protein tyrosine    | protein tyrosine    | NM_130853,NM                          | NM_130853,NM_130854,NM_002 |
| 2.37E+02 | 7.89E+00  | protein tyrosine    | protein tyrosine    | NM_130853,NM                          | NM_130853,NM_130854,NM_002 |
| 2.50E+02 | 7.96E+00  | chromosome 22       | chromosome 22       | NM_182520                             | NM_182520                  |

|          |           |                                                         |                                                     |                                                     |
|----------|-----------|---------------------------------------------------------|-----------------------------------------------------|-----------------------------------------------------|
| 4.33E-03 | -7.85E+00 | microseminoprotein natriuretic peptide                  | NM_001044264                                        | NM_001044264                                        |
| 4.33E-03 | -7.85E+00 | microseminoprotein natriuretic peptide                  | NM_001044264                                        | NM_001044264                                        |
| 3.22E+02 | 8.33E+00  | H19, imprinted non insulin-like growth factor           | NR_002196                                           | NR_002196                                           |
| 3.25E+02 | 8.34E+00  | spectrin, beta, erythrocyte spectrin, beta, erythrocyte | NM_000347                                           | NM_000347                                           |
| 4.37E-03 | -7.84E+00 | signal transducer low density lipoprotein receptor      | NM_003153                                           | NM_003153                                           |
| 3.70E-03 | -8.08E+00 | zinc finger protein zinc finger protein                 | NM_022103                                           | NM_022103                                           |
| 3.61E+02 | 8.50E+00  | single stranded C single stranded C                     | NM_032627,NM_001009998                              | NM_032627,NM_001009998                              |
| 3.61E+02 | 8.50E+00  | inositol-3-phosphatase inositol-3-phosphatase           | NM_016368                                           | NM_016368                                           |
| 4.08E-03 | -7.94E+00 | lipocalin 1 (tear factor odorant binding protein)       | NM_002297                                           | NM_002297                                           |
| 2.40E+02 | 7.91E+00  | active BCR-related tumor suppressor                     | NM_001159746                                        | NM_001159746                                        |
| 2.11E+02 | 7.72E+00  | lemur tyrosine kinase lemur tyrosine kinase             | NM_001080434                                        | NM_001080434                                        |
| 2.11E+02 | 7.72E+00  | lemur tyrosine kinase lemur tyrosine kinase             | NM_001080434                                        | NM_001080434                                        |
| 3.74E+02 | 8.55E+00  | ankyrin repeat domain phosphoglucomutase                | NM_001012419, NM_001012419, NM_032250               | NM_001012419, NM_001012419, NM_032250               |
| 5.76E-03 | -7.44E+00 | G protein-coupled zinc finger protein                   | NM_017986,NM_001104577                              | NM_017986,NM_001104577                              |
| 2.70E+02 | 8.07E+00  | speedy homolog speedy homolog                           | NM_001146210                                        | NM_001146210                                        |
| 2.70E+02 | 8.07E+00  | speedy homolog speedy homolog                           | NM_001146210                                        | NM_001146210                                        |
| 5.02E-03 | -7.64E+00 | phosphoinositide netrin 1                               | NM_014308,NM_001142633                              | NM_014308,NM_001142633                              |
| 2.53E+02 | 7.98E+00  | tudor domain co-asparaginase homolog                    | NM_153046                                           | NM_153046                                           |
| 2.59E+02 | 8.02E+00  | tripartite motif-c upstream binding factor              | NM_001146208, NM_001146208, NM_001145126            | NM_001146208, NM_001146208, NM_001145126            |
| 2.59E+02 | 8.02E+00  | tripartite motif-c upstream binding factor              | NM_001146208, NM_001146208, NM_001145126            | NM_001146208, NM_001146208, NM_001145126            |
| 3.40E-03 | -8.20E+00 | profilin 3 coagulation factor                           | NM_001029886                                        | NM_001029886                                        |
| 2.42E+02 | 7.92E+00  | cytoskeleton-associated cytoskeleton-associated         | NM_006825                                           | NM_006825                                           |
| 2.42E+02 | 7.92E+00  | cytoskeleton-associated cytoskeleton-associated         | NM_006825                                           | NM_006825                                           |
| 3.08E+02 | 8.27E+00  | ATP synthase, H+ zinc finger protein                    | NM_001003713, NM_001003713, NM_001003714, NR_002768 | NM_001003713, NM_001003713, NM_001003714, NR_002768 |
| 2.10E+02 | 7.72E+00  | SH3-domain GRB SH3-domain GRB                           | NM_020145                                           | NM_020145                                           |
| 2.71E+02 | 8.08E+00  | zinc finger and beta chromosome 20                      | NM_025224                                           | NM_025224                                           |
| 2.00E+02 | 7.64E+00  | sodium channel, WD repeat domain                        | NM_014139                                           | NM_014139                                           |
| 2.10E+02 | 7.72E+00  | glutamate receptor tubulin folding cofactor             | NM_014619                                           | NM_014619                                           |
| 2.10E+02 | 7.72E+00  | glutamate receptor tubulin folding cofactor             | NM_014619                                           | NM_014619                                           |
| 2.16E+02 | 7.76E+00  | pellino homolog pellino homolog                         | NM_001098510, NM_001098510, NM_145065               | NM_001098510, NM_001098510, NM_145065               |
| 3.57E-03 | -8.13E+00 | acetylcholinesterase mucin 17, cell surface             | NM_015831,NM_000665                                 | NM_015831,NM_000665                                 |
| 2.46E+02 | 7.94E+00  | pericentriolar pericentriolar                           | NM_006031                                           | NM_006031                                           |
| 2.46E+02 | 7.94E+00  | pericentriolar pericentriolar                           | NM_006031                                           | NM_006031                                           |
| 2.48E+02 | 7.95E+00  | lysine (K)-specific lysine (K)-specific                 | NM_015015                                           | NM_015015                                           |
| 2.48E+02 | 7.95E+00  | lysine (K)-specific lysine (K)-specific                 | NM_015015                                           | NM_015015                                           |
| 2.53E+02 | 7.98E+00  | hydatidiform moxa hydatidiform moxa                     | NR_002768                                           | NR_002768                                           |
| 2.79E+02 | 8.12E+00  | potassium channel potassium channel                     | NM_001142730, NM_001142730, NM_001136205, NR_002768 | NM_001142730, NM_001142730, NM_001136205, NR_002768 |
| 2.79E+02 | 8.12E+00  | potassium channel potassium channel                     | NM_001142730, NM_001142730, NM_001136205, NR_002768 | NM_001142730, NM_001142730, NM_001136205, NR_002768 |
| 2.24E+02 | 7.81E+00  | acyl-CoA thioesterase acyl-CoA thioesterase             | NM_006821                                           | NM_006821                                           |
| 2.90E+02 | 8.18E+00  | protein kinase, c protein kinase, c                     | NM_002735                                           | NM_002735                                           |
| 2.90E+02 | 8.18E+00  | protein kinase, c protein kinase, c                     | NM_002735                                           | NM_002735                                           |
| 2.74E+02 | 8.10E+00  | 5-oxoprolinase (L) 5-oxoprolinase (L)                   | NM_017570                                           | NM_017570                                           |
| 3.47E+02 | 8.44E+00  | olfactory receptor zinc finger protein                  | NM_012368                                           | NM_012368                                           |
| 3.47E+02 | 8.44E+00  | olfactory receptor zinc finger protein                  | NM_012368                                           | NM_012368                                           |
| 3.80E+02 | 8.57E+00  | netrin 5 netrin 5                                       | NM_145807                                           | NM_145807                                           |
| 2.37E+02 | 7.89E+00  | NODAL modulator nuclear pore component                  | NM_014287                                           | NM_014287                                           |
| 2.13E+02 | 7.74E+00  | stem-loop binding stem-loop binding                     | NM_006527                                           | NM_006527                                           |
| 3.67E-03 | -8.09E+00 | kaptin (actin binding N-ethylmaleimide sensitive)       | NM_007059                                           | NM_007059                                           |
| 2.50E+02 | 7.97E+00  | keratin 79 keratin 79                                   | NM_175834                                           | NM_175834                                           |
| 2.50E+02 | 7.97E+00  | keratin 79 keratin 79                                   | NM_175834                                           | NM_175834                                           |
| 2.50E+02 | 7.97E+00  | keratin 79 keratin 78                                   | NM_175834                                           | NM_175834                                           |
| 2.37E+02 | 7.89E+00  | adrenergic, beta, ankyrin repeat domain                 | NM_001619                                           | NM_001619                                           |
| 2.77E+02 | 8.11E+00  | tubulin, gamma (tubulin, gamma)                         | NM_006659                                           | NM_006659                                           |
| 2.77E+02 | 8.11E+00  | tubulin, gamma (tubulin, gamma)                         | NM_006659                                           | NM_006659                                           |
| 2.43E+02 | 7.92E+00  | myeloma overexpression cyclin D1                        | NM_138768                                           | NM_138768                                           |
| 3.89E+02 | 8.60E+00  | ankyrin repeat domain ankyrin repeat domain             | NM_013275                                           | NM_013275                                           |
| 3.79E-03 | -8.04E+00 | rabphilin 3A-like chromosome 17                         | NM_006987                                           | NM_006987                                           |
| 3.41E+02 | 8.41E+00  | guanylate cyclase forkhead box J3                       | NM_033553                                           | NM_033553                                           |

|          |           |                                       |                                                                                         |                                                                                         |
|----------|-----------|---------------------------------------|-----------------------------------------------------------------------------------------|-----------------------------------------------------------------------------------------|
| 2.99E+02 | 8.22E+00  | sperm acrosome ribosomal protei       | NM_133498                                                                               | NM_133498                                                                               |
| 2.99E+02 | 8.22E+00  | sperm acrosome ribosomal protei       | NM_133498                                                                               | NM_133498                                                                               |
| 4.90E-03 | -7.67E+00 | ST3 beta-galacto hypothetical pro     | NM_001042437                                                                            | NM_001042437                                                                            |
| 3.07E+02 | 8.26E+00  | arachidonate 12- arachidonate 12-     | NR_002710                                                                               | NR_002710                                                                               |
| 2.52E+02 | 7.98E+00  | kinesin family mε kinesin family mε   | NM_015656                                                                               | NM_015656                                                                               |
| 2.52E+02 | 7.98E+00  | kinesin family mε kinesin family mε   | NM_015656                                                                               | NM_015656                                                                               |
| 3.02E+02 | 8.24E+00  | UDP-N-acetyl-alç hypothetical LOC     | NM_021808,NM_001122636                                                                  | NM_021808,NM_001122636                                                                  |
| 3.02E+02 | 8.24E+00  | UDP-N-acetyl-alç hypothetical LOC     | NM_021808,NM_001122636                                                                  | NM_021808,NM_001122636                                                                  |
| 2.45E+02 | 7.94E+00  | pleckstrin homol pleckstrin homol     | NM_015164                                                                               | NM_015164                                                                               |
| 2.45E+02 | 7.94E+00  | pleckstrin homol pleckstrin homol     | NM_015164                                                                               | NM_015164                                                                               |
| 3.29E+02 | 8.36E+00  | scavenger recept scavenger recept     | NM_153334,NM_182895                                                                     | NM_153334,NM_182895                                                                     |
| 2.90E+02 | 8.18E+00  | deoxythymidylat inhibitor of grow     | NM_012145                                                                               | NM_012145                                                                               |
| 2.90E+02 | 8.18E+00  | deoxythymidylat inhibitor of grow     | NM_012145                                                                               | NM_012145                                                                               |
| 2.13E+02 | 7.74E+00  | AT rich interactiv WD repeat domε     | NM_005224                                                                               | NM_005224                                                                               |
| 2.77E+02 | 8.11E+00  | insulin-like growt ribosomal protei   | NM_006547                                                                               | NM_006547                                                                               |
| 3.76E+02 | 8.56E+00  | family with sequi family with sequi   | NM_001002034                                                                            | NM_001002034                                                                            |
| 1.88E+00 | 9.11E-01  | zinc finger CCH- gasdermin D          | NM_015117                                                                               | NM_015117                                                                               |
| 1.88E+00 | 9.11E-01  | zinc finger CCH- gasdermin D          | NM_015117                                                                               | NM_015117                                                                               |
| 4.08E-03 | -7.94E+00 | LEM domain con motilin                | NM_181336,NM_001143944                                                                  | NM_181336,NM_001143944                                                                  |
| 4.53E+02 | 8.82E+00  | SPARC related m thrombospondin        | NM_022138                                                                               | NM_022138                                                                               |
| 2.72E+02 | 8.09E+00  | BMS1 pseudoger SEC24 family, mε       | NR_026592                                                                               | NR_026592                                                                               |
| 2.92E-03 | -8.42E+00 | cat eye syndromi cat eye syndromi     | NM_017424                                                                               | NM_017424                                                                               |
| 2.92E-03 | -8.42E+00 | cat eye syndromi cat eye syndromi     | NM_017424                                                                               | NM_017424                                                                               |
| 2.92E-03 | -8.42E+00 | cat eye syndromi cat eye syndromi     | NM_017424                                                                               | NM_017424                                                                               |
| 2.28E+02 | 7.83E+00  | zinc finger protei zinc finger protei | NM_001080409                                                                            | NM_001080409                                                                            |
| 2.28E+02 | 7.83E+00  | zinc finger protei zinc finger protei | NM_001080409                                                                            | NM_001080409                                                                            |
| 4.09E-03 | -7.93E+00 | chromosome 15 syntaxin binding        | NR_003954                                                                               | NR_003954                                                                               |
| 2.53E+02 | 7.98E+00  | family with sequi keratinocyte gro    | NM_001145196                                                                            | NM_001145196                                                                            |
| 4.27E+02 | 8.74E+00  | serum/glucocort serum/glucocort       | NM_170693                                                                               | NM_170693                                                                               |
| 3.70E+02 | 8.53E+00  | DNA (cytosine-5- DNA (cytosine-5-     | NM_013369,NM_175867                                                                     | NM_013369,NM_175867                                                                     |
| 2.75E+02 | 8.10E+00  | chromosome 19 cell division cycle     | NM_033513                                                                               | NM_033513                                                                               |
| 2.13E+02 | 7.74E+00  | forkhead box F2 forkhead box C1       | NM_001452                                                                               | NM_001452                                                                               |
| 2.66E+02 | 8.05E+00  | zinc finger protei zinc finger protei | NM_001113525                                                                            | NM_001113525                                                                            |
| 2.66E+02 | 8.05E+00  | zinc finger protei zinc finger protei | NM_001113525                                                                            | NM_001113525                                                                            |
| 3.79E-03 | -8.04E+00 | S-phase kinase-a protein phosphat     | NM_006930,NM_170679                                                                     | NM_006930,NM_170679                                                                     |
| 2.28E+02 | 7.83E+00  | forkhead box K2 forkhead box K2       | NM_004514                                                                               | NM_004514                                                                               |
| 3.40E+02 | 8.41E+00  | immunoglobulin immunoglobulin         | NM_020962                                                                               | NM_020962                                                                               |
| 2.37E+02 | 7.89E+00  | 5-oxoprolinase (/ 5-oxoprolinase (/   | NM_017570                                                                               | NM_017570                                                                               |
| 2.71E+02 | 8.08E+00  | BTG3 associated BTG3 associated       | NM_017869,NM_079837                                                                     | NM_017869,NM_079837                                                                     |
| 2.71E+02 | 8.08E+00  | BTG3 associated BTG3 associated       | NM_017869,NM_079837                                                                     | NM_017869,NM_079837                                                                     |
| 2.71E+02 | 8.08E+00  | BTG3 associated BTG3 associated       | NM_017869,NM_079837                                                                     | NM_017869,NM_079837                                                                     |
| 2.00E+02 | 7.64E+00  | serpin peptidase chromosome 18        | NM_001031848, NM_198833, NM_001031848, NM_198833, NM_001031848, NM_198833, NM_001031848 | NM_001031848, NM_198833, NM_001031848, NM_198833, NM_001031848, NM_198833, NM_001031848 |
| 2.01E+02 | 7.65E+00  | megakaryoblasti megakaryoblasti       | NM_020831                                                                               | NM_020831                                                                               |
| 2.01E+02 | 7.65E+00  | megakaryoblasti megakaryoblasti       | NM_020831                                                                               | NM_020831                                                                               |
| 2.19E+02 | 7.78E+00  | nuclear receptor nuclear receptor     | NM_004959                                                                               | NM_004959                                                                               |
| 2.19E+02 | 7.78E+00  | nuclear receptor nuclear receptor     | NM_004959                                                                               | NM_004959                                                                               |
| 2.41E+02 | 7.91E+00  | coenzyme Q4 ho solute carrier fan     | NM_016035                                                                               | NM_016035                                                                               |
| 1.92E+02 | 7.59E+00  | glutamate-rich 1 discs, large (Dros   | NM_207332                                                                               | NM_207332                                                                               |
| 2.40E+02 | 7.91E+00  | frizzled homolog ankyrin repeat di    | NM_031866                                                                               | NM_031866                                                                               |
| 2.45E+02 | 7.94E+00  | F-box and leucini F-box and leucini   | NM_022824                                                                               | NM_022824                                                                               |
| 2.59E+02 | 8.02E+00  | 5-hydroxytryptar interleukin-1 reci   | NM_000863                                                                               | NM_000863                                                                               |
| 2.68E+02 | 8.06E+00  | null golgin A8 family, null           | null                                                                                    | null                                                                                    |
| 2.26E+02 | 7.82E+00  | chromosome 17 rabaptin, RAB GT        | NM_207103                                                                               | NM_207103                                                                               |
| 2.26E+02 | 7.82E+00  | rabaptin, RAB GT rabaptin, RAB GT     | NM_001083585, NM_004703                                                                 | NM_001083585, NM_004703                                                                 |
| 3.13E+02 | 8.29E+00  | myeloid/lymphoi myeloid/lymphoi       | NM_005934                                                                               | NM_005934                                                                               |
| 3.13E+02 | 8.29E+00  | myeloid/lymphoi myeloid/lymphoi       | NM_005934                                                                               | NM_005934                                                                               |
| 3.03E+02 | 8.24E+00  | zinc finger and B' zinc finger and B' | NM_025224                                                                               | NM_025224                                                                               |

|          |           |                                                                                                      |              |
|----------|-----------|------------------------------------------------------------------------------------------------------|--------------|
| 3.03E+02 | 8.24E+00  | zinc finger and B' zinc finger and B' NM_025224                                                      | NM_025224    |
| 3.03E+02 | 8.24E+00  | zinc finger and B' zinc finger and B' NM_025224                                                      | NM_025224    |
| 4.59E+02 | 8.84E+00  | hypothetical LOC fibrosin-like 1 NR_024563                                                           | NR_024563    |
| 3.04E-03 | -8.36E+00 | EGF-containing fi coiled-coil doma NM_004105,NM_004105,NM_001039349,NM_001039349                     |              |
| 3.04E-03 | -8.36E+00 | EGF-containing fi coiled-coil doma NM_004105,NM_004105,NM_001039349,NM_001039349                     |              |
| 4.40E-03 | -7.83E+00 | SH2 domain cont SH2 domain cont NM_170600,NM_170600,NM_005489,NM_005489                              |              |
| 4.40E-03 | -7.83E+00 | SH2 domain cont SH2 domain cont NM_170600,NM_170600,NM_005489,NM_005489                              |              |
| 4.72E+02 | 8.88E+00  | protein tyrosine protein tyrosine NM_130842,NM_130842,NM_130843,NM_130843                            |              |
| 2.28E+02 | 7.83E+00  | transforming, aci fibroblast growth factor 2 NM_006342                                               | NM_006342    |
| 2.01E+02 | 7.65E+00  | chromosome 20 chromosome 20 NM_080616                                                                | NM_080616    |
| 2.31E+02 | 7.85E+00  | NODAL modulator polycystic kidney disease 1 NM_001004067                                             | NM_001004067 |
| 4.05E-03 | -7.95E+00 | colony stimulator interleukin 3 receptor 1 NM_172247                                                 | NM_172247    |
| 2.76E+02 | 8.11E+00  | mediator complex TBC1 domain family member 1 NM_005121                                               | NM_005121    |
| 3.00E+02 | 8.23E+00  | tumor suppressor tetratricopeptide repeat 1 NM_003310                                                | NM_003310    |
| 3.00E+02 | 8.23E+00  | tumor suppressor tetratricopeptide repeat 1 NM_003310                                                | NM_003310    |
| 2.10E+02 | 7.71E+00  | zinc finger protein zinc finger protein NM_213605                                                    | NM_213605    |
| 2.10E+02 | 7.71E+00  | zinc finger protein zinc finger protein NM_213605                                                    | NM_213605    |
| 2.31E+02 | 7.85E+00  | cell adhesion molecule BUD13 homolog NM_014333,NM_014333,NM_001098517                                |              |
| 2.31E+02 | 7.85E+00  | cell adhesion molecule BUD13 homolog NM_014333,NM_014333,NM_001098517                                |              |
| 2.28E+02 | 7.83E+00  | olfactory receptor olfactory receptor NM_001005277, NM_001005277,NM_001005221,NM_001005221           |              |
| 4.57E-03 | -7.77E+00 | solute carrier family heat shock protein 70 class member 177 NM_001078177                            | NM_001078177 |
| 3.04E+02 | 8.25E+00  | hypothetical LOC carboxypeptidase Y NR_024480                                                        | NR_024480    |
| 3.04E+02 | 8.25E+00  | hypothetical LOC carboxypeptidase Y NR_024480                                                        | NR_024480    |
| 3.36E-03 | -8.22E+00 | small nuclear ribonucleoprotein gamma-glutamyl transferase 1 NM_004175                               | NM_004175    |
| 4.17E+02 | 8.70E+00  | cadherin 24, type 1 apoptotic chromosome 11 NM_022478,NM_022478,NM_144985                            |              |
| 3.58E-03 | -8.13E+00 | chromosome 9 o methyltransferase 1 NM_199350                                                         | NM_199350    |
| 2.19E+02 | 7.78E+00  | hypothetical LOC hypothetical LOC NR_026964                                                          | NR_026964    |
| 2.19E+02 | 7.78E+00  | G-protein signaling G-protein signaling NM_001145638, NM_001145638,NM_015597                         |              |
| 3.77E-03 | -8.05E+00 | fibroblast growth factor fibroblast growth factor NM_023107,NM_023107,NM_023108                      |              |
| 3.77E-03 | -8.05E+00 | fibroblast growth factor chromosome 8 o NM_023107,NM_023107,NM_023108                                |              |
| 2.18E+02 | 7.77E+00  | TMF1-regulated TMF1-regulated NM_001013642                                                           | NM_001013642 |
| 2.26E+02 | 7.82E+00  | golgin A3 golgin A3 NM_005895                                                                        | NM_005895    |
| 3.06E+02 | 8.26E+00  | methionine aminotransferase distal-less homeobox 1 NM_199227                                         | NM_199227    |
| 2.18E+02 | 7.77E+00  | fibroblast growth factor nuclear receptor NM_022963                                                  | NM_022963    |
| 2.18E+02 | 7.77E+00  | fibroblast growth factor nuclear receptor NM_022963                                                  | NM_022963    |
| 2.13E+02 | 7.74E+00  | transcription factor NFAT activating protein 1 NM_005650,NM_005650,NM_181492                         |              |
| 1.99E+02 | 7.64E+00  | ephrin-A2 ephrin-A2 NM_001405                                                                        | NM_001405    |
| 1.99E+02 | 7.64E+00  | ephrin-A2 melanoma associated protein 1 NM_001405                                                    | NM_001405    |
| 2.09E+02 | 7.70E+00  | calmodulin regulator calmodulin regulator NM_015447                                                  | NM_015447    |
| 2.09E+02 | 7.70E+00  | calmodulin regulator UBA domain containing 1 NM_015447                                               | NM_015447    |
| 2.09E+02 | 7.70E+00  | calmodulin regulator UBA domain containing 1 NM_015447                                               | NM_015447    |
| 3.10E+02 | 8.27E+00  | transmembrane lipase, member 1 NM_080652                                                             | NM_080652    |
| 3.91E+02 | 8.61E+00  | coiled-coil domain coiled-coil domain NM_001136505                                                   | NM_001136505 |
| 2.70E+02 | 8.07E+00  | zinc finger RNA binding zinc finger RNA binding NM_015174                                            | NM_015174    |
| 2.07E+02 | 7.69E+00  | proteasome (pro) colony stimulator 1 NM_002809                                                       | NM_002809    |
| 3.50E+02 | 8.45E+00  | tumor necrosis factor mitochondrial inhibitor 1 NM_018647                                            | NM_018647    |
| 2.96E+02 | 8.21E+00  | solute carrier family solute carrier family NM_004174                                                | NM_004174    |
| 2.96E+02 | 8.21E+00  | solute carrier family solute carrier family NM_004174                                                | NM_004174    |
| 2.97E+02 | 8.22E+00  | alkaline phosphatase alkaline phosphatase NM_031313                                                  | NM_031313    |
| 2.97E+02 | 8.22E+00  | alkaline phosphatase alkaline phosphatase NM_031313                                                  | NM_031313    |
| 2.19E+02 | 7.78E+00  | runt-related transcription factor runt-related transcription factor NM_001754,NM_001754,NM_001001890 |              |
| 2.08E+02 | 7.70E+00  | F-box and leucine-rich repeat F-box and leucine-rich repeat NM_001099784                             | NM_001099784 |
| 3.12E-03 | -8.32E+00 | placenta-specific placenta-specific NM_182832                                                        | NM_182832    |
| 2.30E+02 | 7.84E+00  | RasGEF domain family FXYD domain containing 1 NM_145313                                              | NM_145313    |
| 2.30E+02 | 7.84E+00  | RasGEF domain family FXYD domain containing 1 NM_145313                                              | NM_145313    |
| 4.16E-03 | -7.91E+00 | zinc finger protein zinc finger protein NM_021915                                                    | NM_021915    |
| 4.16E-03 | -7.91E+00 | zinc finger protein zinc finger protein NM_021915                                                    | NM_021915    |
| 3.17E+02 | 8.31E+00  | potassium voltage-gated potassium voltage-gated channel subfamily A member 10 NM_172109              | NM_172109    |

|          |           |                                               |                            |                            |
|----------|-----------|-----------------------------------------------|----------------------------|----------------------------|
| 3.17E+02 | 8.31E+00  | potassium voltage potassium voltage           | NM_172109                  | NM_172109                  |
| 3.17E+02 | 8.31E+00  | potassium voltage potassium voltage           | NM_172109                  | NM_172109                  |
| 2.22E+02 | 7.79E+00  | sulfotransferase eukaryotic transl            | NM_001055,NM_177529,NM_177 | NM_001055,NM_177529,NM_177 |
| 2.22E+02 | 7.79E+00  | sulfotransferase eukaryotic transl            | NM_001055,NM_177529,NM_177 | NM_001055,NM_177529,NM_177 |
| 2.65E+02 | 8.05E+00  | chromosome 1 o KIAA1751                       | NM_001003808               | NM_001003808               |
| 4.19E-03 | -7.90E+00 | olfactory receptor olfactory receptor         | NM_001001959               | NM_001001959               |
| 2.33E+02 | 7.87E+00  | sphingosine-1-phosphate mitochondrial rib     | NM_004230                  | NM_004230                  |
| 2.49E+02 | 7.96E+00  | melanoma antigen melanoma antigen             | NM_175743,NM_175742,NM_005 | NM_175743,NM_175742,NM_005 |
| 2.78E+02 | 8.12E+00  | cadherin 15, type cadherin 15, type           | NM_004933                  | NM_004933                  |
| 2.78E+02 | 8.12E+00  | cadherin 15, type cadherin 15, type           | NM_004933                  | NM_004933                  |
| 2.45E+02 | 7.94E+00  | Theg homolog (n C2 calcium-depende            | NM_199202,NM_016585        | NM_199202,NM_016585        |
| 2.59E+02 | 8.02E+00  | TBC1 domain fan TBC1 domain fan               | NM_019020                  | NM_019020                  |
| 2.59E+02 | 8.02E+00  | TBC1 domain fan TBC1 domain fan               | NM_019020                  | NM_019020                  |
| 2.30E+02 | 7.84E+00  | solute carrier fan solute carrier fan         | NM_033125                  | NM_033125                  |
| 2.30E+02 | 7.84E+00  | solute carrier fan solute carrier fan         | NM_033125                  | NM_033125                  |
| 2.46E+02 | 7.94E+00  | ribosomal RNA p pyridoxal (pyrido             | NM_015056                  | NM_015056                  |
| 2.46E+02 | 7.94E+00  | ribosomal RNA p pyridoxal (pyrido             | NM_015056                  | NM_015056                  |
| 2.30E+02 | 7.84E+00  | MAX dimerization lectin, mannose-             | NM_031300                  | NM_031300                  |
| 2.30E+02 | 7.84E+00  | lectin, mannose- lectin, mannose-             | NM_006816                  | NM_006816                  |
| 2.13E+02 | 7.74E+00  | chromosome 19 phosphatidylinos                | NM_021231                  | NM_021231                  |
| 2.13E+02 | 7.74E+00  | chromosome 19 phosphatidylinos                | NM_021231                  | NM_021231                  |
| 2.24E+02 | 7.81E+00  | CD248 molecule, CD248 molecule,               | NM_020404                  | NM_020404                  |
| 3.31E-03 | -8.24E+00 | phosphatidylinos M-phase phosph               | NM_020845                  | NM_020845                  |
| 4.65E+02 | 8.86E+00  | small nucleolar R purinergic recept           | NR_003688                  | NR_003688                  |
| 2.12E+02 | 7.73E+00  | serine/arginine-r serine/arginine-r           | NM_003769                  | NM_003769                  |
| 2.12E+02 | 7.73E+00  | serine/arginine-r dynein, light chai          | NM_003769                  | NM_003769                  |
| 2.12E+02 | 7.73E+00  | dynein, light chai dynein, light chai         | NM_001037494               | NM_001037494               |
| 2.62E+02 | 8.03E+00  | zinc finger, DHH zinc finger, DHH             | NM_153251                  | NM_153251                  |
| 2.62E+02 | 8.03E+00  | zinc finger, DHH zinc finger, DHH             | NM_153251                  | NM_153251                  |
| 3.30E+02 | 8.37E+00  | protease, serine- protease, serine-           | NM_214710                  | NM_214710                  |
| 5.06E-03 | -7.63E+00 | F-box protein 32 F-box protein 32             | NM_058229,NM_148177        | NM_058229,NM_148177        |
| 5.06E-03 | -7.63E+00 | F-box protein 32 F-box protein 32             | NM_058229,NM_148177        | NM_058229,NM_148177        |
| 2.46E+02 | 7.94E+00  | PR domain conta null                          | NM_052996,NM_001098173     | NM_052996,NM_001098173     |
| 2.46E+02 | 7.94E+00  | PR domain conta null                          | NM_052996,NM_001098173     | NM_052996,NM_001098173     |
| 2.08E+02 | 7.70E+00  | ADAM metalloprotein ADAM metalloprotein       | NM_030957                  | NM_030957                  |
| 3.16E+02 | 8.30E+00  | POTE ankyrin domain POTE ankyrin domain       | NM_001005356,NR_027480     | NM_001005356,NR_027480     |
| 3.16E+02 | 8.30E+00  | MACRO domain MACRO domain                     | NM_014067                  | NM_014067                  |
| 2.43E+02 | 7.92E+00  | LAG1 homolog, c LAG1 homolog, c               | NM_022075,NM_181746        | NM_022075,NM_181746        |
| 2.43E+02 | 7.92E+00  | LAG1 homolog, c LAG1 homolog, c               | NM_022075,NM_181746        | NM_022075,NM_181746        |
| 2.31E+02 | 7.85E+00  | sema domain, trans sema domain, trans         | NM_032108                  | NM_032108                  |
| 2.31E+02 | 7.85E+00  | sema domain, trans sema domain, trans         | NM_032108                  | NM_032108                  |
| 3.42E+02 | 8.42E+00  | inositol polyphosphate inositol polyphosphate | NM_019892                  | NM_019892                  |
| 3.17E+02 | 8.31E+00  | matrix metalloprotein matrix metalloprotein   | NM_016155                  | NM_016155                  |
| 2.50E+02 | 7.96E+00  | GLI family zinc finger GLI family zinc finger | NM_000168                  | NM_000168                  |
| 2.80E+02 | 8.13E+00  | cyclin N-terminal cyclin N-terminal           | NM_024877                  | NM_024877                  |
| 2.24E+02 | 7.81E+00  | solute carrier fan solute carrier fan         | NM_022082                  | NM_022082                  |
| 2.24E+02 | 7.81E+00  | solute carrier fan solute carrier fan         | NM_022082                  | NM_022082                  |
| 2.50E+02 | 7.97E+00  | regulatory associated regulatory associated   | NM_020761                  | NM_020761                  |
| 2.50E+02 | 7.97E+00  | regulatory associated regulatory associated   | NM_020761                  | NM_020761                  |
| 2.37E+02 | 7.89E+00  | IQ motif and Sec nucleoporin 210              | NM_014869,NM_001134382     | NM_014869,NM_001134382     |
| 2.26E+02 | 7.82E+00  | chromosome 22 bromodomain cc                  | NR_026997                  | NR_026997                  |
| 2.98E+02 | 8.22E+00  | ligase I, DNA, ATI caspase recruitment        | NM_000234                  | NM_000234                  |
| 2.98E+02 | 8.22E+00  | ligase I, DNA, ATI caspase recruitment        | NM_000234                  | NM_000234                  |
| 2.98E+02 | 8.22E+00  | ligase I, DNA, ATI caspase recruitment        | NM_000234                  | NM_000234                  |
| 2.71E+02 | 8.08E+00  | solute carrier fan solute carrier fan         | NM_130849,NM_017767        | NM_130849,NM_017767        |
| 2.71E+02 | 8.08E+00  | solute carrier fan solute carrier fan         | NM_130849,NM_017767        | NM_130849,NM_017767        |
| 2.48E+02 | 7.95E+00  | protein O-fucosyl protein O-fucosyl           | NR_004858,NM_133635,NM_015 | NR_004858,NM_133635,NM_015 |
| 2.99E+02 | 8.22E+00  | distal-less homeobox distal-less homeobox     | NM_004405                  | NM_004405                  |

|          |           |                    |                    |               |                             |
|----------|-----------|--------------------|--------------------|---------------|-----------------------------|
| 2.99E+02 | 8.22E+00  | distal-less homec  | distal-less homec  | NM_004405     | NM_004405                   |
| 2.65E+02 | 8.05E+00  | solute carrier fan | solute carrier fan | NM_004174     | NM_004174                   |
| 2.48E+02 | 7.95E+00  | coiled-coil domai  | chromosome 7 o     | NM_138771     | NM_138771                   |
| 2.48E+02 | 7.95E+00  | coiled-coil domai  | chromosome 7 o     | NM_138771     | NM_138771                   |
| 2.48E+02 | 7.95E+00  | zinc finger, DHC   | zinc finger, DHC   | NM_153746,NM  | NM_153746,NM_024630         |
| 2.48E+02 | 7.95E+00  | zinc finger, DHC   | zinc finger, DHC   | NM_153746,NM  | NM_153746,NM_024630         |
| 2.24E+02 | 7.81E+00  | perilipin 2        | DENN/MADD do       | NM_001122     | NM_001122                   |
| 2.93E+02 | 8.20E+00  | active BCR-relate  | active BCR-relate  | NM_001159746  | NM_001159746                |
| 2.93E+02 | 8.20E+00  | active BCR-relate  | active BCR-relate  | NM_001159746  | NM_001159746                |
| 2.75E+02 | 8.10E+00  | KN motif and an    | KN motif and an    | NM_015493,NM  | NM_015493,NM_001136191      |
| 2.75E+02 | 8.10E+00  | KN motif and an    | KN motif and an    | NM_015493,NM  | NM_015493,NM_001136191      |
| 2.34E+02 | 7.87E+00  | zinc finger protei | non-protein codi   | NM_003408     | NM_003408                   |
| 2.34E+02 | 7.87E+00  | zinc finger protei | non-protein codi   | NM_003408     | NM_003408                   |
| 4.03E-03 | -7.95E+00 | family with sequi  | family with sequi  | NM_001136233  | NM_001136233                |
| 2.43E+02 | 7.92E+00  | non-protein codi   | non-protein codi   | NR_026873     | NR_026873                   |
| 3.57E+02 | 8.48E+00  | non-protein codi   | phosphofructoki    | NM_001098830  | NM_001098830                |
| 3.40E+02 | 8.41E+00  | aldehyde dehydr    | unc-51-like kinas  | NM_001135168, | NM_001135168,NM_001135167,N |
| 3.00E+02 | 8.23E+00  | orthodenticle ho   | exocyst complex    | NM_172337,NM  | NM_172337,NM_021728         |
| 3.00E+02 | 8.23E+00  | orthodenticle ho   | exocyst complex    | NM_172337,NM  | NM_172337,NM_021728         |
| 3.00E+02 | 8.23E+00  | orthodenticle ho   | exocyst complex    | NM_172337,NM  | NM_172337,NM_021728         |
| 3.00E+02 | 8.23E+00  | orthodenticle ho   | exocyst complex    | NM_172337,NM  | NM_172337,NM_021728         |
| 3.03E+02 | 8.24E+00  | E4F transcription  | E4F transcription  | NM_004424     | NM_004424                   |
| 3.03E+02 | 8.24E+00  | E4F transcription  | E4F transcription  | NM_004424     | NM_004424                   |
| 2.53E+02 | 7.98E+00  | unc-5 homolog A    | unc-5 homolog A    | NM_133369     | NM_133369                   |
| 5.00E-03 | -7.64E+00 | polymerase (RN     | polymerase (RN     | NM_016310     | NM_016310                   |
| 5.00E-03 | -7.64E+00 | polymerase (RN     | polymerase (RN     | NM_016310     | NM_016310                   |
| 2.59E+02 | 8.02E+00  | Smith-Magenis s    | sterol regulatory  | NR_024007     | NR_024007                   |
| 2.69E+02 | 8.07E+00  | receptor-associa   | receptor-associa   | NM_005055,NM  | NM_005055,NM_032645         |
| 2.69E+02 | 8.07E+00  | receptor-associa   | receptor-associa   | NM_005055,NM  | NM_005055,NM_032645         |
| 2.69E+02 | 8.07E+00  | receptor-associa   | CUGBP, Elav-like   | NM_005055,NM  | NM_005055,NM_032645         |
| 3.13E+02 | 8.29E+00  | ---                | sodium channel,    | NR_027361     | NR_027361                   |
| 3.13E+02 | 8.29E+00  | ---                | sodium channel,    | NR_027361     | NR_027361                   |
| 4.64E-03 | -7.75E+00 | neuroblastoma b    | hypothetical FLJ   | NM_001101663  | NM_001101663                |
| 4.64E-03 | -7.75E+00 | neuroblastoma b    | hypothetical FLJ   | NM_001101663  | NM_001101663                |
| 2.90E+02 | 8.18E+00  | integrator compl   | integrator compl   | NR_027393     | NR_027393                   |
| 2.79E+02 | 8.12E+00  | ADAM metallope     | ADAM metallope     | NM_001109     | NM_001109                   |
| 2.13E+02 | 7.74E+00  | transmembrane      | transmembrane      | NM_133448     | NM_133448                   |
| 2.99E+02 | 8.22E+00  | protein phosphat   | protein phosphat   | NM_013239,NM  | NM_013239,NM_199326         |
| 4.32E-03 | -7.86E+00 | zinc finger protei | hypothetical LOC   | NM_001002844  | NM_001002844                |
| 2.92E+02 | 8.19E+00  | family with sequi  | family with sequi  | NM_001142864  | NM_001142864                |
| 2.92E+02 | 8.19E+00  | family with sequi  | family with sequi  | NM_001142864  | NM_001142864                |
| 2.96E+02 | 8.21E+00  | TBC1 domain fan    | TBC1 domain fan    | NM_014346     | NM_014346                   |
| 2.96E+02 | 8.21E+00  | TBC1 domain fan    | TBC1 domain fan    | NM_014346     | NM_014346                   |
| 2.66E+02 | 8.05E+00  | TBC1 domain fan    | TBC1 domain fan    | NM_024682     | NM_024682                   |
| 2.66E+02 | 8.05E+00  | TBC1 domain fan    | TBC1 domain fan    | NM_024682     | NM_024682                   |
| 2.54E+02 | 7.99E+00  | chromosome 18      | chromosome 18      | NM_004338,NM  | NM_004338,NM_181483         |
| 2.54E+02 | 7.99E+00  | chromosome 18      | chromosome 18      | NM_004338,NM  | NM_004338,NM_181483         |
| 5.32E-03 | -7.55E+00 | NHL repeat cont    | adrenergic, beta-  | NM_198514     | NM_198514                   |
| 3.64E+02 | 8.51E+00  | paraneoplastic a   | paraneoplastic a   | NM_013364     | NM_013364                   |
| 4.50E-03 | -7.80E+00 | crystallin, beta   | A: immunoglobulin  | NM_000496     | NM_000496                   |
| 4.50E-03 | -7.80E+00 | immunoglobulin     | immunoglobulin     | NM_001013618  | NM_001013618                |
| 2.32E+02 | 7.86E+00  | hect domain and    | TP53 target 3B     | NR_002827     | NR_002827                   |
| 3.77E-03 | -8.05E+00 | zinc finger protei | zinc finger protei | NM_030634,NM  | NM_030634,NM_001077195      |
| 3.77E-03 | -8.05E+00 | zinc finger protei | zinc finger protei | NM_030634,NM  | NM_030634,NM_001077195      |
| 2.40E+02 | 7.91E+00  | zinc finger protei | zinc finger protei | NM_001080485  | NM_001080485                |
| 2.40E+02 | 7.91E+00  | zinc finger protei | zinc finger protei | NM_001080485  | NM_001080485                |
| 3.48E+02 | 8.44E+00  | protein phosphat   | protein phosphat   | NM_013239,NM  | NM_013239,NM_199326         |
| 3.48E+02 | 8.44E+00  | protein phosphat   | protein phosphat   | NM_013239,NM  | NM_013239,NM_199326         |



|          |           |                                                     |                                                      |
|----------|-----------|-----------------------------------------------------|------------------------------------------------------|
| 3.48E+02 | 8.44E+00  | protein phosphatase 1                               | NM_013239,NM_013239,NM_199326                        |
| 3.72E+02 | 8.54E+00  | family with sequence similarity to KIAA0182         | NM_198491 NM_198491                                  |
| 3.72E+02 | 8.54E+00  | family with sequence similarity to KIAA0182         | NM_198491 NM_198491                                  |
| 2.17E+02 | 7.76E+00  | zinc finger protein SUMO1 pseudogene                | NM_006526 NM_006526                                  |
| 2.54E+02 | 7.99E+00  | DENN/MADD domain transmembrane protein              | NM_015213 NM_015213                                  |
| 2.54E+02 | 7.99E+00  | DENN/MADD domain transmembrane protein              | NM_015213 NM_015213                                  |
| 2.06E+02 | 7.68E+00  | cytochrome P450 2C19                                | NM_017781 NM_017781                                  |
| 2.06E+02 | 7.68E+00  | cytochrome P450 2C19                                | NM_017781 NM_017781                                  |
| 2.77E+02 | 8.11E+00  | anoctamin 8                                         | NM_020959 NM_020959                                  |
| 2.10E+02 | 7.71E+00  | guanine nucleotide binding protein gamma-13         | NM_002072 NM_002072                                  |
| 2.12E+02 | 7.73E+00  | PR domain containing protein 1                      | NM_199454,NM_199454,NM_022114                        |
| 2.30E+02 | 7.84E+00  | contactin 3 (plasma membrane protein)               | NM_020872 NM_020872                                  |
| 2.35E+02 | 7.88E+00  | tRNA splicing endonuclease 3                        | NM_207346 NM_207346                                  |
| 4.70E-03 | -7.73E+00 | solute carrier family 3 member 3                    | NM_001145963, NM_001145963,NM_001145964,NM_001145965 |
| 2.26E+02 | 7.82E+00  | cell death-inducing DMPK-like protein 6             | NM_198289 NM_198289                                  |
| 3.06E+02 | 8.26E+00  | transmembrane protein 148                           | NM_014858 NM_014858                                  |
| 2.68E+02 | 8.06E+00  | quaking homolog 6 chromosome 6                      | NM_006775,NM_006775,NM_206855,NM_206856              |
| 2.68E+02 | 8.06E+00  | quaking homolog 6 chromosome 6                      | NM_006775,NM_006775,NM_206855,NM_206856              |
| 2.68E+02 | 8.06E+00  | quaking homolog 6 chromosome 6                      | NM_006775,NM_006775,NM_206855,NM_206856              |
| 4.70E+02 | 8.88E+00  | lymphocyte-specific gamma-glutamyl aminotransferase | NR_027238 NR_027238                                  |
| 4.70E+02 | 8.88E+00  | lymphocyte-specific gamma-glutamyl aminotransferase | NR_027238 NR_027238                                  |
| 4.70E+02 | 8.88E+00  | lymphocyte-specific gamma-glutamyl aminotransferase | NR_027238 NR_027238                                  |
| 2.82E+02 | 8.14E+00  | ectonucleoside triphosphate phosphatase 9           | NM_203468,NM_203468,NM_001246                        |
| 5.44E-03 | -7.52E+00 | ankyrin repeat domain G protein-coupled receptor 1  | NR_027019, NR_027019, NR_027020                      |
| 5.44E-03 | -7.52E+00 | ankyrin repeat domain G protein-coupled receptor 1  | NR_027019, NR_027019, NR_027020                      |
| 2.05E+02 | 7.68E+00  | aquaporin 12A                                       | NM_198998 NM_198998                                  |
| 2.05E+02 | 7.68E+00  | aquaporin 12A                                       | NM_198998 NM_198998                                  |
| 1.94E+02 | 7.60E+00  | GTP binding protein phosphatase 1                   | NM_012227 NM_012227                                  |
| 1.94E+02 | 7.60E+00  | GTP binding protein phosphatase 1                   | NM_012227 NM_012227                                  |
| 4.02E+02 | 8.65E+00  | septin 9                                            | NM_001113493 NM_001113493                            |
| 4.68E+02 | 8.87E+00  | paired-like homeobox protein 1                      | NM_153426,NM_153426,NM_153427,NM_000153428           |
| 4.68E+02 | 8.87E+00  | paired-like homeobox protein 1                      | NM_153426,NM_153426,NM_153427,NM_000153428           |
| 4.27E-03 | -7.87E+00 | UDP glucuronosyltransferase 1A                      | NM_019075 NM_019075                                  |
| 4.27E-03 | -7.87E+00 | UDP glucuronosyltransferase 1A                      | NM_019075 NM_019075                                  |
| 2.31E+02 | 7.85E+00  | protein O-fucosyltransferase 1                      | NR_004858,NM_004858,NM_133635,NM_015363              |
| 3.27E+02 | 8.35E+00  | poly(rC) binding protein 1                          | NM_001130141, NM_001130141,NM_020528                 |
| 3.41E+02 | 8.41E+00  | telomerase reverse transcriptase                    | NM_198253,NM_198253,NM_198255                        |
| 3.41E+02 | 8.41E+00  | telomerase reverse transcriptase                    | NM_198253,NM_198253,NM_198255                        |
| 2.23E+02 | 7.80E+00  | HCC-related protein 8 chromosome 8                  | NR_024479 NR_024479                                  |
| 4.35E-03 | -7.84E+00 | Cdk5 and Abl kinase domain                          | NM_001100619 NM_001100619                            |
| 4.35E-03 | -7.84E+00 | Cdk5 and Abl kinase domain                          | NM_138375 NM_138375                                  |
| 3.60E+02 | 8.49E+00  | phosphoinositide 3-kinase gamma                     | NM_152671,NM_152671,NM_015040                        |
| 3.60E+02 | 8.49E+00  | phosphoinositide 3-kinase gamma                     | NM_152671,NM_152671,NM_015040                        |
| 4.43E-03 | -7.82E+00 | olfactory receptor co-receptor 1                    | NM_013940 NM_013940                                  |
| 4.57E-03 | -7.77E+00 | pre-B-cell leukemia protein                         | NM_025245 NM_025245                                  |
| 2.18E+02 | 7.77E+00  | YY1 associated factor 1                             | NM_005748 NM_005748                                  |
| 2.37E+02 | 7.89E+00  | fibroblast growth factor receptor 3                 | NM_020637 NM_020637                                  |
| 2.37E+02 | 7.89E+00  | fibroblast growth factor receptor 3                 | NM_020637 NM_020637                                  |
| 2.83E+02 | 8.14E+00  | organic solute transporter 1                        | NM_152672 NM_152672                                  |
| 2.60E+02 | 8.02E+00  | MAD1 mitotic arrest protein 1                       | NM_003550,NM_003550,NM_001013837,NM_001013838        |
| 4.05E+02 | 8.66E+00  | polycystic kidney disease 13                        | NM_178541 NM_178541                                  |
| 2.65E+02 | 8.05E+00  | DNA cross-link repair protein 1                     | NM_022836 NM_022836                                  |
| 2.82E+02 | 8.14E+00  | amyloid beta (A4)                                   | NM_001163 NM_001163                                  |
| 2.82E+02 | 8.14E+00  | amyloid beta (A4)                                   | NM_001163 NM_001163                                  |
| 4.83E-03 | -7.69E+00 | postmeiotic segregation 1                           | NR_022007 NR_022007                                  |
| 4.34E+02 | 8.76E+00  | mitochondrial ribosomal protein L12                 | NM_024026 NM_024026                                  |
| 3.67E+02 | 8.52E+00  | NLR family, pyrin domain containing 1               | NM_138329 NM_138329                                  |
| 3.67E+02 | 8.52E+00  | NLR family, pyrin domain containing 1               | NM_138329 NM_138329                                  |

|          |           |                    |                      |               |                             |
|----------|-----------|--------------------|----------------------|---------------|-----------------------------|
| 3.67E+02 | 8.52E+00  | NLR family, pyrin  | ATH1, acid treha     | NM_138329     | NM_138329                   |
| 2.29E+02 | 7.84E+00  | actin filament as: | actin filament as:   | NM_001134647, | NM_001134647,NM_198595      |
| 4.80E-03 | -7.70E+00 | deoxynucleotidyl   | deoxynucleotidyl     | NM_052951     | NM_052951                   |
| 3.57E+02 | 8.48E+00  | melanoma antigen   | VENT homeobox        | NM_173523     | NM_173523                   |
| 2.04E+02 | 7.67E+00  | sterile alpha mot  | protein kinase, c    | NM_138352     | NM_138352                   |
| 2.39E+02 | 7.90E+00  | Yes-associated p1  | Yes-associated p1    | NM_006106,NM  | NM_006106,NM_001130145      |
| 2.46E+02 | 7.94E+00  | peptidase (mitoc   | peptidase (mitoc     | NM_015160     | NM_015160                   |
| 2.25E+02 | 7.81E+00  | chromosome 4 o     | protocadherin 1(     | NM_001099783  | NM_001099783                |
| 2.25E+02 | 7.81E+00  | chromosome 4 o     | protocadherin 1(     | NM_001099783  | NM_001099783                |
| 2.97E+02 | 8.22E+00  | zinc finger and B' | zinc finger and B'   | NM_181842     | NM_181842                   |
| 2.97E+02 | 8.22E+00  | zinc finger and B' | zinc finger and B'   | NM_181842     | NM_181842                   |
| 3.59E-03 | -8.12E+00 | neuronal guaninε   | sialidase 2 (cytos   | NM_001114090, | NM_001114090,NM_019850      |
| 2.44E+02 | 7.93E+00  | hyaluronan and ϕ   | hyaluronan and ϕ     | NM_023002     | NM_023002                   |
| 2.97E+02 | 8.22E+00  | paralemmin         | chromosome 19        | NM_001040134, | NM_001040134,NM_002579      |
| 2.99E+02 | 8.22E+00  | transketolase-lik  | filamin A, alpha     | NM_001145934  | NM_001145934                |
| 2.99E+02 | 8.22E+00  | transketolase-lik  | filamin A, alpha     | NM_001145934  | NM_001145934                |
| 2.99E+02 | 8.22E+00  | transketolase-lik  | filamin A, alpha     | NM_001145934  | NM_001145934                |
| 4.80E-03 | -7.70E+00 | UDP-Gal:betaGlc    | UDP-Gal:betaGlc      | NM_033173,NM  | NM_033173,NM_033172,NM_033  |
| 2.30E+02 | 7.84E+00  | ELK4, ETS-domai    | ELK4, ETS-domai      | NM_021795     | NM_021795                   |
| 2.30E+02 | 7.84E+00  | NK6 homeobox 1     | NK6 homeobox 1       | NM_006168     | NM_006168                   |
| 3.00E+02 | 8.23E+00  | coiled-coil domai  | coiled-coil doma     | NM_013301     | NM_013301                   |
| 2.23E+02 | 7.80E+00  | embigin pseudog    | hypothetical FLJ     | NR_003955     | NR_003955                   |
| 4.11E+02 | 8.68E+00  | solute carrier fan | solute carrier fan   | NM_004174     | NM_004174                   |
| 2.88E+02 | 8.17E+00  | DOT1-like, histor  | DOT1-like, histor    | NM_032482     | NM_032482                   |
| 2.38E+02 | 7.90E+00  | non-protein codi   | sperm acrosome       | NR_002767     | NR_002767                   |
| 3.16E+02 | 8.30E+00  | CTD (carboxy-ter   | potassium voltag     | NM_048368,NM  | NM_048368,NM_004715         |
| 2.77E+02 | 8.11E+00  | plexin B2          | plexin B2            | NM_012401     | NM_012401                   |
| 2.77E+02 | 8.11E+00  | plexin B2          | plexin B2            | NM_012401     | NM_012401                   |
| 3.34E+02 | 8.38E+00  | tryptase delta 1   | tryptase delta 1     | NM_012217     | NM_012217                   |
| 4.94E-03 | -7.66E+00 | PR domain conta    | PR domain conta      | NM_199454,NM  | NM_199454,NM_022114         |
| 4.03E-03 | -7.95E+00 | thioredoxin dom    | thioredoxin dom      | NM_001098530  | NM_001098530                |
| 2.97E+02 | 8.22E+00  | AT rich interactiv | AT rich interactiv   | NM_005224     | NM_005224                   |
| 2.97E+02 | 8.22E+00  | AT rich interactiv | AT rich interactiv   | NM_005224     | NM_005224                   |
| 2.66E+02 | 8.05E+00  | cytoplasmic poly   | chromosome 5 o       | NM_030627     | NM_030627                   |
| 2.55E+02 | 8.00E+00  | Janus kinase and   | dihydropyrimidir     | NM_001105521  | NM_001105521                |
| 2.55E+02 | 8.00E+00  | Janus kinase and   | dihydropyrimidir     | NM_001105521  | NM_001105521                |
| 3.35E+02 | 8.39E+00  | TEL2, telomere n   | TEL2, telomere n     | NM_016111     | NM_016111                   |
| 3.35E+02 | 8.39E+00  | TEL2, telomere n   | TEL2, telomere n     | NM_016111     | NM_016111                   |
| 2.33E+02 | 7.87E+00  | chromosome 1 o     | chromosome 1 o       | NM_001142569  | NM_001142569                |
| 2.33E+02 | 7.87E+00  | chromosome 1 o     | chromosome 1 o       | NM_001142569  | NM_001142569                |
| 2.30E+02 | 7.84E+00  | chromosome 5 o     | iroquois homeob      | NM_178569     | NM_178569                   |
| 2.30E+02 | 7.84E+00  | chromosome 5 o     | iroquois homeob      | NM_178569     | NM_178569                   |
| 3.82E+02 | 8.58E+00  | hepatoma derive    | hepatoma derive      | NM_138574     | NM_138574                   |
| 2.33E+02 | 7.87E+00  | proteasome (pro    | protein tyrosine     | NM_020232     | NM_020232                   |
| 2.98E+02 | 8.22E+00  | lysine (K)-specif  | ic lysine (K)-specif | NM_015015     | NM_015015                   |
| 2.98E+02 | 8.22E+00  | lysine (K)-specif  | ic lysine (K)-specif | NM_015015     | NM_015015                   |
| 2.90E+02 | 8.18E+00  | RRN3 RNA polynr    | MPV17 mitochor       | NM_018427     | NM_018427                   |
| 2.90E+02 | 8.18E+00  | RRN3 RNA polynr    | MPV17 mitochor       | NM_018427     | NM_018427                   |
| 3.17E-03 | -8.30E+00 | mitogen-activate   | tetraspanin 33       | NR_002144     | NR_002144                   |
| 2.17E+02 | 7.76E+00  | family with sequi  | hypothetical LOC     | NM_018232     | NM_018232                   |
| 2.17E+02 | 7.76E+00  | family with sequi  | hypothetical LOC     | NM_018232     | NM_018232                   |
| 5.52E-03 | -7.50E+00 | regulator of G-pr  | regulator of G-pr    | NM_002928     | NM_002928                   |
| 5.52E-03 | -7.50E+00 | regulator of G-pr  | regulator of G-pr    | NM_002928     | NM_002928                   |
| 2.58E-03 | -8.60E+00 | leucine-rich repe  | wingless-type MI     | NM_020678     | NM_020678                   |
| 2.30E+02 | 7.85E+00  | RRN3 RNA polynr    | MPV17 mitochor       | NM_018427     | NM_018427                   |
| 2.50E+02 | 7.96E+00  | tumor protein p7   | tumor protein p7     | NM_001126240, | NM_001126240,NM_001126242,N |
| 4.07E+02 | 8.67E+00  | RAS p21 protein    | cell division cycle  | NM_007368     | NM_007368                   |
| 2.21E+02 | 7.79E+00  | ubiquitin specific | chromosome 16        | NM_003470     | NM_003470                   |

|          |           |                    |                    |                                           |                                          |
|----------|-----------|--------------------|--------------------|-------------------------------------------|------------------------------------------|
| 2.21E+02 | 7.79E+00  | chromosome 16      | chromosome 16      | NM_014117                                 | NM_014117                                |
| 2.13E+02 | 7.74E+00  | BTG3 associated    | BTG3 associated    | NM_017869,NM_017869,NM_079837             | NM_017869,NM_079837                      |
| 2.13E+02 | 7.74E+00  | BTG3 associated    | BTG3 associated    | NM_017869,NM_017869,NM_079837             | NM_017869,NM_079837                      |
| 4.03E+02 | 8.65E+00  | IZUMO family m     | IZUMO family m     | NM_001039846, NM_001039846,NM_001031735   | NM_001039846,NM_001031735                |
| 3.93E+02 | 8.62E+00  | ArfGAP with dua    | ArfGAP with dua    | NM_006869                                 | NM_006869                                |
| 3.93E+02 | 8.62E+00  | ArfGAP with dua    | ArfGAP with dua    | NM_006869                                 | NM_006869                                |
| 3.93E+02 | 8.62E+00  | ArfGAP with dua    | ArfGAP with dua    | NM_006869                                 | NM_006869                                |
| 2.20E+02 | 7.78E+00  | O-6-methylguani    | O-6-methylguani    | NM_002412                                 | NM_002412                                |
| 2.30E+02 | 7.85E+00  | cysteine-rich PAK  | family with sequ   | NM_175918                                 | NM_175918                                |
| 2.25E+02 | 7.81E+00  | cartilage interme  | cartilage interme  | NM_153221                                 | NM_153221                                |
| 2.25E+02 | 7.81E+00  | cartilage interme  | cartilage interme  | NM_153221                                 | NM_153221                                |
| 2.25E+02 | 7.81E+00  | cartilage interme  | cartilage interme  | NM_153221                                 | NM_153221                                |
| 3.35E+02 | 8.39E+00  | G protein pathwa   | neuralized homo    | NM_004489                                 | NM_004489                                |
| 2.61E+02 | 8.03E+00  | RAN binding prot   | coiled-coil doma   | NM_005493                                 | NM_005493                                |
| 3.75E-03 | -8.06E+00 | neuronal guanin    | sialidase 2 (cytos | NM_001114090, NM_001114090,NM_019850      | NM_001114090,NM_019850                   |
| 2.57E+02 | 8.01E+00  | olfactory receptc  | null               | NM_001005224, NM_001005224,NM_001005221,N | NM_001005224,NM_001005224,NM_001005221,N |
| 2.57E+02 | 8.01E+00  | olfactory receptc  | null               | NM_001005224, NM_001005224,NM_001005221,N | NM_001005224,NM_001005224,NM_001005221,N |
| 2.48E+02 | 7.95E+00  | patatin-like phos  | variable charge,   | NM_001142389, NM_001142389,NM_004650      | NM_001142389,NM_004650                   |
| 2.38E+02 | 7.90E+00  | EPS8-like 2        | transaldolase 1    | NM_022772                                 | NM_022772                                |
| 2.38E+02 | 7.90E+00  | EPS8-like 2        | transaldolase 1    | NM_022772                                 | NM_022772                                |
| 2.38E+02 | 7.90E+00  | EPS8-like 2        | transaldolase 1    | NM_022772                                 | NM_022772                                |
| 3.51E-03 | -8.15E+00 | chromosome 16      | chromosome 16      | NM_001012991                              | NM_001012991                             |
| 2.75E+02 | 8.10E+00  | coagulation factc  | coagulation factc  | NM_003950                                 | NM_003950                                |
| 3.98E+02 | 8.64E+00  | cadherin 4, type   | cadherin 4, type   | NM_001794                                 | NM_001794                                |
| 2.56E+02 | 8.00E+00  | axin 1             | mitochondrial rit  | NM_181050,NM_181050,NM_003502             | NM_181050,NM_003502                      |
| 2.71E+02 | 8.08E+00  | pre-B lymphocyt    | BMS1 homolog, i    | NM_007128                                 | NM_007128                                |
| 2.46E+02 | 7.94E+00  | MACRO domain       | MACRO domain       | NM_014067                                 | NM_014067                                |
| 2.83E+02 | 8.14E+00  | thyroid peroxida   | peroxidasin hom    | NM_000547,NM_000547,NM_175719,NM_175      | NM_000547,NM_175719,NM_175               |
| 2.83E+02 | 8.14E+00  | thyroid peroxida   | peroxidasin hom    | NM_000547,NM_000547,NM_175719,NM_175      | NM_000547,NM_175719,NM_175               |
| 2.83E+02 | 8.14E+00  | thyroid peroxida   | peroxidasin hom    | NM_000547,NM_000547,NM_175719,NM_175      | NM_000547,NM_175719,NM_175               |
| 4.18E-03 | -7.90E+00 | glycophorin A (M   | hedgehog intera    | NM_002099                                 | NM_002099                                |
| 2.39E+02 | 7.90E+00  | glutamate recept   | glutamate recept   | NM_000836                                 | NM_000836                                |
| 4.52E-03 | -7.79E+00 | keratin 74         | keratin 72         | NM_175053                                 | NM_175053                                |
| 4.15E-03 | -7.91E+00 | cerebellin 3 prec  | cerebellin 3 prec  | NM_001039771                              | NM_001039771                             |
| 2.64E+02 | 8.04E+00  | glutamate recept   | olfactory receptc  | NR_027044                                 | NR_027044                                |
| 2.64E+02 | 8.04E+00  | glutamate recept   | olfactory receptc  | NR_027044                                 | NR_027044                                |
| 2.63E+02 | 8.04E+00  | 2'-5'-oligoadenyl  | deltex homolog :   | NM_001032731, NM_001032731,NM_002535,NM_  | NM_001032731,NM_002535,NM_               |
| 2.63E+02 | 8.04E+00  | deltex homolog     | deltex homolog :   | NM_004416                                 | NM_004416                                |
| 2.30E+02 | 7.84E+00  | plasma cell-induc  | spermatogenesis    | NM_016459                                 | NM_016459                                |
| 2.26E+02 | 7.82E+00  | olfactory receptc  | olfactory receptc  | NR_002171                                 | NR_002171                                |
| 2.25E+02 | 7.81E+00  | protein kinase N:  | prostaglandin E r  | NM_213560                                 | NM_213560                                |
| 2.25E+02 | 7.81E+00  | prostaglandin E r  | prostaglandin E r  | NM_000955                                 | NM_000955                                |
| 2.25E+02 | 7.81E+00  | prostaglandin E r  | prostaglandin E r  | NM_000955                                 | NM_000955                                |
| 2.35E+02 | 7.88E+00  | neuro-oncologic    | coiled-coil doma   | NM_002516                                 | NM_002516                                |
| 2.42E+02 | 7.92E+00  | differentially exp | differentially exp | NM_022047                                 | NM_022047                                |
| 3.68E-03 | -8.09E+00 | actin, beta pseuc  | amylase, alpha 2   | NR_024438                                 | NR_024438                                |
| 3.68E-03 | -8.09E+00 | actin, beta pseuc  | amylase, alpha 2   | NR_024438                                 | NR_024438                                |
| 2.22E+02 | 7.79E+00  | death-associated   | family with sequ   | NM_014326                                 | NM_014326                                |
| 2.19E+02 | 7.78E+00  | F-box and WD re    | F-box and WD re    | NM_022039                                 | NM_022039                                |
| 3.24E+02 | 8.34E+00  | zinc finger protei | zinc finger protei | NM_001042428, NM_001042428,NM_003456      | NM_001042428,NM_003456                   |
| 2.50E+02 | 7.96E+00  | dapper, antagoni   | dapper, antagoni   | NM_001079520, NM_001079520,NM_016651      | NM_001079520,NM_016651                   |
| 3.46E+02 | 8.43E+00  | kelch-like 17 (Drc | kelch-like 17 (Drc | NM_198317                                 | NM_198317                                |
| 5.22E-03 | -7.58E+00 | family with sequ   | hypothetical LOC   | NR_026714                                 | NR_026714                                |
| 2.96E+02 | 8.21E+00  | C-terminal bindir  | hypothetical LOC   | NM_022802,NM_022802,NM_001329,NM_001      | NM_022802,NM_001329,NM_001               |
| 2.03E+02 | 7.66E+00  | claudin 15         | claudin 15         | NM_014343                                 | NM_014343                                |
| 2.84E+02 | 8.15E+00  | serine/threonine   | serine/threonine   | NM_173575                                 | NM_173575                                |
| 2.84E+02 | 8.15E+00  | serine/threonine   | serine/threonine   | NM_173575                                 | NM_173575                                |
| 2.84E+02 | 8.15E+00  | serine/threonine   | serine/threonine   | NM_173575                                 | NM_173575                                |

|          |           |                     |                     |                                                             |              |
|----------|-----------|---------------------|---------------------|-------------------------------------------------------------|--------------|
| 2.84E+02 | 8.15E+00  | TBC1 domain fan     | TBC1 domain fan     | NM_019020                                                   | NM_019020    |
| 2.84E+02 | 8.15E+00  | TBC1 domain fan     | TBC1 domain fan     | NM_019020                                                   | NM_019020    |
| 3.46E-03 | -8.17E+00 | apolipoprotein B    | ATPase family, A    | NM_000384                                                   | NM_000384    |
| 2.42E+02 | 7.92E+00  | junctophilin 4      | dehydrogenase/i     | NM_032452,NM_032452,NM_001146028                            |              |
| 2.73E+02 | 8.09E+00  | EGF-like-domain,    | EGF-like-domain,    | NM_030652                                                   | NM_030652    |
| 4.21E-03 | -7.89E+00 | glucosidase, alph   | glucosidase, alph   | NM_000152,NM_000152,NM_001079804,NM_001079804               |              |
| 4.78E-03 | -7.71E+00 | hect domain and     | TP53 target 3B      | NR_002827                                                   | NR_002827    |
| 2.56E+02 | 8.00E+00  | BARX homeobox       | transmembrane       | NM_003658                                                   | NM_003658    |
| 2.56E+02 | 8.00E+00  | BARX homeobox       | transmembrane       | NM_003658                                                   | NM_003658    |
| 2.70E+02 | 8.07E+00  | fibroblast growth   | ring finger protei  | NM_020637                                                   | NM_020637    |
| 2.70E+02 | 8.07E+00  | ring finger protei  | ring finger protei  | NM_194460                                                   | NM_194460    |
| 2.21E+02 | 7.79E+00  | MAP7 domain cc      | MAP7 domain cc      | NM_018067                                                   | NM_018067    |
| 4.39E+02 | 8.78E+00  | nuclear receptor    | nuclear receptor    | NM_006312,NM_006312,NM_001077261                            |              |
| 4.39E+02 | 8.78E+00  | nuclear receptor    | nuclear receptor    | NM_006312,NM_006312,NM_001077261                            |              |
| 2.33E+02 | 7.87E+00  | zinc finger protei  | hypothetical LOC    | NM_145287                                                   | NM_145287    |
| 3.49E+02 | 8.45E+00  | tubulin, gamma c    | tubulin, gamma c    | NM_006322                                                   | NM_006322    |
| 2.85E+02 | 8.15E+00  | hypothetical LOC    | COBW domain c       | NR_015377                                                   | NR_015377    |
| 2.11E+02 | 7.72E+00  | null                | family with sequ    | null                                                        | null         |
| 2.43E+02 | 7.92E+00  | ADP-ribosylation    | protein kinase C    | NM_001142293,NM_001142293,NM_014570                         |              |
| 2.79E+02 | 8.12E+00  | fizzy/cell division | fizzy/cell division | NM_001136197,NM_001136197,NM_001136198                      |              |
| 2.45E+02 | 7.94E+00  | peptidase inhibit   | peptidase inhibit   | NM_153370                                                   | NM_153370    |
| 2.45E+02 | 7.94E+00  | peptidase inhibit   | peptidase inhibit   | NM_153370                                                   | NM_153370    |
| 2.94E+02 | 8.20E+00  | heparan sulfate c   | placenta-specific   | NM_004807                                                   | NM_004807    |
| 3.38E-03 | -8.21E+00 | archaelysin famil   | archaelysin famil   | NM_001033569,NM_001033569,NM_001033570,NM_001033570         |              |
| 3.53E+02 | 8.46E+00  | lipase maturatio    | lipase maturatio    | NM_022773                                                   | NM_022773    |
| 3.90E-03 | -8.00E+00 | Fanconi anemia,     | Fanconi anemia,     | NM_004629                                                   | NM_004629    |
| 3.90E-03 | -8.00E+00 | Fanconi anemia,     | Fanconi anemia,     | NM_004629                                                   | NM_004629    |
| 2.40E+02 | 7.91E+00  | anterior gradient   | anterior gradient   | NM_006408                                                   | NM_006408    |
| 2.40E+02 | 7.91E+00  | anterior gradient   | anterior gradient   | NM_006408                                                   | NM_006408    |
| 3.59E+02 | 8.49E+00  | POTE ankyrin do     | POTE ankyrin do     | NM_001005356,NM_001005356,NR_027480                         |              |
| 4.23E+02 | 8.72E+00  | RecQ protein-like   | RecQ protein-like   | NM_004259                                                   | NM_004259    |
| 2.31E+02 | 7.85E+00  | hect domain and     | TP53 target 3B      | NR_002827                                                   | NR_002827    |
| 2.31E+02 | 7.85E+00  | hect domain and     | TP53 target 3B      | NR_002827                                                   | NR_002827    |
| 2.04E+02 | 7.67E+00  | NADH dehydroge      | NADH dehydroge      | NM_024407                                                   | NM_024407    |
| 2.30E+02 | 7.84E+00  | retinol dehydrog    | staufen, RNA bin    | NM_172037                                                   | NM_172037    |
| 4.52E-03 | -7.79E+00 | transporter 2, AT   | proteasome (pro     | NM_000544                                                   | NM_000544    |
| 4.40E-03 | -7.83E+00 | chromosome 3 o      | Boc homolog (m      | NM_001025072,NM_001025072,NM_015412,NM_015412               |              |
| 2.33E+02 | 7.87E+00  | sema domain, se     | sema domain, se     | NM_001031702                                                | NM_001031702 |
| 2.51E+02 | 7.97E+00  | olfactory recept    | olfactory recept    | NM_001005277,NM_001005277,NM_001005221,NM_001005221         |              |
| 3.77E+02 | 8.56E+00  | opioid growth fa    | opioid growth fa    | NM_007346                                                   | NM_007346    |
| 4.38E-03 | -7.83E+00 | small nucleolar     | R hypothetical LOC  | NR_003014                                                   | NR_003014    |
| 2.69E+02 | 8.07E+00  | nucleolar comple    | UDP-N-acetyl-al     | NM_024078                                                   | NM_024078    |
| 2.69E+02 | 8.07E+00  | nucleolar comple    | UDP-N-acetyl-al     | NM_024078                                                   | NM_024078    |
| 4.33E-03 | -7.85E+00 | ret finger protei   | ret finger protei   | NM_006604                                                   | NM_006604    |
| 2.61E+02 | 8.03E+00  | stathmin-like 3     | stathmin-like 3     | NM_015894                                                   | NM_015894    |
| 4.15E-03 | -7.91E+00 | LIM and senesce     | LIM and senesce     | NM_033514,NR_033514,NR_027144,NR_027144,NR_027144,NR_027144 |              |
| 4.15E-03 | -7.91E+00 | LIM and senesce     | LIM and senesce     | NM_033514,NR_033514,NR_027144,NR_027144,NR_027144,NR_027144 |              |
| 3.34E+02 | 8.38E+00  | hypothetical LOC    | hypothetical LOC    | NR_027034                                                   | NR_027034    |
| 3.34E+02 | 8.38E+00  | hypothetical LOC    | hypothetical LOC    | NR_027034                                                   | NR_027034    |
| 3.34E+02 | 8.38E+00  | hypothetical LOC    | hypothetical LOC    | NR_027034                                                   | NR_027034    |
| 3.34E+02 | 8.38E+00  | hypothetical LOC    | hypothetical LOC    | NR_027034                                                   | NR_027034    |
| 3.34E+02 | 8.38E+00  | hypothetical LOC    | hypothetical LOC    | NR_027034                                                   | NR_027034    |
| 2.96E+02 | 8.21E+00  | chromosome 1 o      | chromosome 1 o      | NM_182533                                                   | NM_182533    |
| 2.96E+02 | 8.21E+00  | chromosome 1 o      | chromosome 1 o      | NM_182533                                                   | NM_182533    |
| 2.96E+02 | 8.21E+00  | chromosome 1 o      | chromosome 1 o      | NM_182533                                                   | NM_182533    |
| 4.62E-03 | -7.76E+00 | WD repeat doma      | WD repeat doma      | NM_018338                                                   | NM_018338    |
| 3.01E+02 | 8.23E+00  | null                | phosphatidylinos    | null                                                        | null         |
| 2.94E-03 | -8.41E+00 | fragile site, foli  | c leucine-rich, gli | NM_145246                                                   | NM_145246    |

|          |           |                                         |                            |                             |
|----------|-----------|-----------------------------------------|----------------------------|-----------------------------|
| 4.29E-03 | -7.87E+00 | zinc finger protei similar to GLI-Kru   | NM_173680                  | NM_173680                   |
| 3.00E+02 | 8.23E+00  | guanine nucleoti calmodulin-like €      | NM_002074                  | NM_002074                   |
| 2.29E+02 | 7.84E+00  | hippocalcin-like : ornithine decarb     | NM_134421                  | NM_134421                   |
| 2.29E+02 | 7.84E+00  | hippocalcin-like : ornithine decarb     | NM_134421                  | NM_134421                   |
| 3.81E-03 | -8.04E+00 | formin 1 formin 1                       | NM_001103184               | NM_001103184                |
| 3.81E-03 | -8.04E+00 | formin 1 ryanodine recept               | NM_001103184               | NM_001103184                |
| 2.74E+02 | 8.10E+00  | interleukin-1 reci pleckstrin homol     | NM_001010844               | NM_001010844                |
| 2.20E+02 | 7.78E+00  | nuclear receptor nuclear receptor       | NM_172349                  | NM_172349                   |
| 2.72E+02 | 8.09E+00  | nuclear factor I/€ chromosome 19        | NM_005597                  | NM_005597                   |
| 2.72E+02 | 8.09E+00  | nuclear factor I/€ chromosome 19        | NM_005597                  | NM_005597                   |
| 3.77E+02 | 8.56E+00  | lipase maturatio SRY (sex determi       | NM_022773                  | NM_022773                   |
| 3.04E+02 | 8.25E+00  | syntaphilin syntaphilin                 | NM_014723                  | NM_014723                   |
| 3.04E+02 | 8.25E+00  | syntaphilin syntaphilin                 | NM_014723                  | NM_014723                   |
| 2.56E+02 | 8.00E+00  | microtubule assc microtubule assc       | NM_015016                  | NM_015016                   |
| 2.56E+02 | 8.00E+00  | microtubule assc microtubule assc       | NM_015016                  | NM_015016                   |
| 3.47E+02 | 8.44E+00  | preferentially ex  preferentially ex    | NM_206953,NM_006115,NM_206 | NM_206953,NM_006115,NM_206  |
| 2.61E+02 | 8.03E+00  | core-binding fact acyl-CoA synthet      | NM_175931,NM_005187        | NM_175931,NM_005187         |
| 2.61E+02 | 8.03E+00  | core-binding fact acyl-CoA synthet      | NM_175931,NM_005187        | NM_175931,NM_005187         |
| 2.33E+02 | 7.87E+00  | family with sequ  family with sequ      | NM_001145402               | NM_001145402                |
| 2.21E+02 | 7.79E+00  | heat shock 70kD heat shock 70kD         | NM_052970                  | NM_052970                   |
| 2.30E+02 | 7.84E+00  | ADAMTS-like 2 ADAMTS-like 2             | NM_001145320               | NM_001145320                |
| 2.01E+02 | 7.65E+00  | myelin basic prot myelin basic prot     | NM_001025100               | NM_001025100                |
| 2.35E+02 | 7.88E+00  | calponin 1, basic, calponin 1, basic,   | NM_001299                  | NM_001299                   |
| 2.63E+02 | 8.04E+00  | thyroid hormone thyroid hormone         | NM_003250                  | NM_003250                   |
| 2.63E+02 | 8.04E+00  | nuclear receptor nuclear receptor       | NM_021724                  | NM_021724                   |
| 2.84E+02 | 8.15E+00  | poliovirus recept poliovirus recept     | NM_001135768,              | NM_001135768,NM_001135769,N |
| 3.10E-03 | -8.33E+00 | NEDD4 binding p ras homolog gen         | NM_018177                  | NM_018177                   |
| 2.51E+02 | 7.97E+00  | similar to hCG18 hypothetical LOC       | NR_024455                  | NR_024455                   |
| 2.51E+02 | 7.97E+00  | similar to hCG18 hypothetical LOC       | NR_024455                  | NR_024455                   |
| 2.61E+02 | 8.03E+00  | Down syndrome Down syndrome             | NM_020693                  | NM_020693                   |
| 2.61E+02 | 8.03E+00  | Down syndrome Down syndrome             | NM_020693                  | NM_020693                   |
| 4.50E+02 | 8.81E+00  | nuclear factor of nuclear factor of     | NM_172387,NM_172389        | NM_172387,NM_172389         |
| 4.50E+02 | 8.81E+00  | nuclear factor of nuclear factor of     | NM_172387,NM_172389        | NM_172387,NM_172389         |
| 2.63E+02 | 8.04E+00  | family with sequ  KIAA0182              | NM_198491                  | NM_198491                   |
| 2.63E+02 | 8.04E+00  | family with sequ  KIAA0182              | NM_198491                  | NM_198491                   |
| 2.43E+02 | 7.92E+00  | LIM homeobox t  zinc finger and B'      | NM_002316                  | NM_002316                   |
| 3.11E+02 | 8.28E+00  | DAZ associated p DAZ associated p       | NM_018959,NM_170711        | NM_018959,NM_170711         |
| 3.11E+02 | 8.28E+00  | DAZ associated p DAZ associated p       | NM_018959,NM_170711        | NM_018959,NM_170711         |
| 3.48E-03 | -8.17E+00 | phosphodiestera SH3-domain GRE          | NM_001037339               | NM_001037339                |
| 2.84E+02 | 8.15E+00  | discs, large (Dros myosin, light cha    | NM_183006                  | NM_183006                   |
| 2.84E+02 | 8.15E+00  | discs, large (Dros myosin, light cha    | NM_183006                  | NM_183006                   |
| 2.23E+02 | 7.80E+00  | integrator compl v-maf musculoa         | NM_001080453               | NM_001080453                |
| 2.23E+02 | 7.80E+00  | v-maf musculoa  v-maf musculoa          | NM_002360                  | NM_002360                   |
| 2.49E+02 | 7.96E+00  | NSL1, MIND kine NSL1, MIND kine         | NM_015471,NM_001042549     | NM_015471,NM_001042549      |
| 2.49E+02 | 7.96E+00  | NSL1, MIND kine NSL1, MIND kine         | NM_015471,NM_001042549     | NM_015471,NM_001042549      |
| 4.72E-03 | -7.73E+00 | SIX homeobox 3 SIX homeobox 2           | NM_005413                  | NM_005413                   |
| 4.47E-03 | -7.81E+00 | kin of IRRE like 2 kin of IRRE like 2   | NM_199180,NM_032123,NM_199 | NM_199180,NM_032123,NM_199  |
| 3.37E+02 | 8.40E+00  | leucine rich repe FUN14 domain c        | NM_178839                  | NM_178839                   |
| 3.60E+02 | 8.49E+00  | golgi to ER traffic golgi to ER traffic | NM_015949                  | NM_015949                   |
| 2.30E+02 | 7.84E+00  | regulatory associ regulatory associ     | NM_020761                  | NM_020761                   |
| 2.30E+02 | 7.84E+00  | regulatory associ regulatory associ     | NM_020761                  | NM_020761                   |
| 2.30E+02 | 7.85E+00  | major facilitator major facilitator     | NM_032219                  | NM_032219                   |
| 2.85E+02 | 8.15E+00  | fibrosin-like 1 fibrosin-like 1         | NM_001142641               | NM_001142641                |
| 2.85E+02 | 8.15E+00  | fibrosin-like 1 fibrosin-like 1         | NM_001142641               | NM_001142641                |
| 2.50E+02 | 7.97E+00  | RGM domain fan RGM domain fan           | NM_020211                  | NM_020211                   |
| 3.71E-03 | -8.07E+00 | synaptic vesicle € IQ motif containi    | NM_014979                  | NM_014979                   |
| 2.43E+02 | 7.92E+00  | endoglin endoglin                       | NM_001114753,              | NM_001114753,NM_000118      |
| 2.43E+02 | 7.92E+00  | endoglin adenylate kinase               | NM_001114753,              | NM_001114753,NM_000118      |

|          |           |                                                      |                                       |
|----------|-----------|------------------------------------------------------|---------------------------------------|
| 4.50E-03 | -7.80E+00 | HSPA (heat shock) BR serine/threonine kinase         | NM_001130106, NM_001130106, NM_012267 |
| 3.65E+02 | 8.51E+00  | nuclear receptor nuclear receptor                    | NM_003269 NM_003269                   |
| 4.59E-03 | -7.77E+00 | hypothetical locus hypothetical locus                | NR_015382 NR_015382                   |
| 3.93E+02 | 8.62E+00  | stabilin 1 stabilin 1                                | NM_015136 NM_015136                   |
| 3.93E+02 | 8.62E+00  | 5'-nucleotidase c 5'-nucleotidase c                  | NM_022908, NM_022908, NM_001134231    |
| 3.93E+02 | 8.62E+00  | 5'-nucleotidase c 5'-nucleotidase c                  | NM_022908, NM_022908, NM_001134231    |
| 3.84E-03 | -8.03E+00 | zinc finger protein zinc finger protein              | NM_080740 NM_080740                   |
| 4.32E-03 | -7.86E+00 | cyclic nucleotide cyclic nucleotide                  | NM_001135639 NM_001135639             |
| 2.12E+02 | 7.73E+00  | WD repeat domain WD repeat domain                    | NM_198285 NM_198285                   |
| 2.80E+02 | 8.13E+00  | zinc finger, SWI5L nanos homolog 3                   | NM_023072 NM_023072                   |
| 2.80E+02 | 8.13E+00  | zinc finger, SWI5L nanos homolog 3                   | NM_023072 NM_023072                   |
| 2.41E+02 | 7.91E+00  | microseminoprotein natriuretic peptide               | NM_001044264 NM_001044264             |
| 2.41E+02 | 7.91E+00  | microseminoprotein natriuretic peptide               | NM_001044264 NM_001044264             |
| 2.87E+02 | 8.16E+00  | protein phosphatase protein phosphatase              | NM_013239, NM_013239, NM_199326       |
| 2.87E+02 | 8.16E+00  | protein phosphatase protein phosphatase              | NM_013239, NM_013239, NM_199326       |
| 2.25E+02 | 7.81E+00  | glycosylphosphatidylinositol zinc finger protein     | NM_178172 NM_178172                   |
| 2.25E+02 | 7.81E+00  | glycosylphosphatidylinositol zinc finger protein     | NM_178172 NM_178172                   |
| 2.32E+02 | 7.86E+00  | solute carrier fan solute carrier fan                | NM_004174 NM_004174                   |
| 2.32E+02 | 7.86E+00  | solute carrier fan solute carrier fan                | NM_004174 NM_004174                   |
| 4.37E-03 | -7.84E+00 | scratch homolog chromosome 20                        | NM_033129 NM_033129                   |
| 4.37E-03 | -7.84E+00 | scratch homolog chromosome 20                        | NM_033129 NM_033129                   |
| 2.63E+02 | 8.04E+00  | hypothetical LOC profilin 1 pseudo                   | NR_024584 NR_024584                   |
| 2.63E+02 | 8.04E+00  | profilin 1 pseudo profilin 1 pseudo                  | NR_003242 NR_003242                   |
| 2.27E+02 | 7.82E+00  | Ras association domain Ras association domain        | NM_018059 NM_018059                   |
| 3.70E-03 | -8.08E+00 | zinc finger, X-link spindlin family, novel           | NM_007156 NM_007156                   |
| 3.22E+02 | 8.33E+00  | FSHD region gene ankyrin repeat domain               | NR_026980 NR_026980                   |
| 2.39E+02 | 7.90E+00  | TP53 target 3 solute carrier fan                     | NM_016212 NM_016212                   |
| 2.39E+02 | 7.90E+00  | TP53 target 3 solute carrier fan                     | NM_016212 NM_016212                   |
| 3.36E-03 | -8.22E+00 | timeless homolog major intrinsic protein             | NM_003920 NM_003920                   |
| 3.36E-03 | -8.22E+00 | major intrinsic protein major intrinsic protein      | NM_012064 NM_012064                   |
| 2.85E+02 | 8.15E+00  | ADAM metalloprotein ADAM metalloprotein              | NM_014244 NM_014244                   |
| 2.65E+02 | 8.05E+00  | nuclear receptor forkhead box M1                     | NM_031474 NM_031474                   |
| 4.45E-03 | -7.81E+00 | ring finger protein ankyrin repeat domain            | NM_183419, NM_183419, NM_015435       |
| 3.55E+02 | 8.47E+00  | chromosome 11 chromosome 11                          | NM_013265 NM_013265                   |
| 4.40E-03 | -7.83E+00 | tumor necrosis factor Parkinson disease              | NM_001561 NM_001561                   |
| 2.78E+02 | 8.12E+00  | proline rich 25 lipase maturation                    | NM_001013638 NM_001013638             |
| 2.78E+02 | 8.12E+00  | proline rich 25 lipase maturation                    | NM_001013638 NM_001013638             |
| 2.85E+02 | 8.15E+00  | chromosome 11 chromosome 11                          | NM_001142946, NM_001142946, NR_024621 |
| 3.25E+02 | 8.34E+00  | v-ski sarcoma virus v-ski sarcoma virus              | NM_003036 NM_003036                   |
| 2.68E+02 | 8.06E+00  | G patch domain WD repeat domain                      | NM_018025 NM_018025                   |
| 3.45E+02 | 8.43E+00  | zinc finger protein                                  | NR_027050 NR_027050                   |
| 2.25E+02 | 7.81E+00  | zinc finger protein zinc finger protein              | NM_153219 NM_153219                   |
| 2.92E+02 | 8.19E+00  | core-binding factor acyl-CoA synthetase              | NM_175931, NM_175931, NM_005187       |
| 2.91E+02 | 8.19E+00  | chondroadherin chondroadherin                        | NM_001267 NM_001267                   |
| 3.89E-03 | -8.01E+00 | family with sequence chromosome 6 open reading frame | NM_001105531, NM_001105531, NM_020819 |
| 2.07E+02 | 7.69E+00  | family with sequence family with sequence            | NM_001082967 NM_001082967             |
| 4.80E-03 | -7.70E+00 | APAF1 interactin APAF1 interactin                    | NM_015957 NM_015957                   |
| 4.80E-03 | -7.70E+00 | APAF1 interactin APAF1 interactin                    | NM_015957 NM_015957                   |
| 2.10E+02 | 7.71E+00  | SH2B adaptor protein SH2B adaptor protein            | NM_020979 NM_020979                   |
| 2.59E+02 | 8.02E+00  | cholinergic receptor potassium voltage-gated         | NM_000744 NM_000744                   |
| 2.32E+02 | 7.86E+00  | notum pectinase notum pectinase                      | NM_178493 NM_178493                   |
| 2.71E+02 | 8.08E+00  | protein phosphatase protein phosphatase              | NM_013239, NM_013239, NM_199326       |
| 4.01E-03 | -7.96E+00 | T-box 5 T-box 5                                      | NM_080718 NM_080718                   |
| 3.85E-03 | -8.02E+00 | chorionic somatomedin growth hormone                 | NM_022644 NM_022644                   |
| 2.12E+02 | 7.73E+00  | G-protein signaling G-protein signaling              | NM_001145638, NM_001145638, NM_015597 |
| 2.12E+02 | 7.73E+00  | G-protein signaling G-protein signaling              | NM_001145638, NM_001145638, NM_015597 |
| 2.42E+02 | 7.92E+00  | nuclear receptor nuclear receptor                    | NM_006312, NM_006312, NM_001077261    |
| 2.42E+02 | 7.92E+00  | nuclear receptor nuclear receptor                    | NM_006312, NM_006312, NM_001077261    |

|          |           |                     |                       |                                      |                            |
|----------|-----------|---------------------|-----------------------|--------------------------------------|----------------------------|
| 2.26E+02 | 7.82E+00  | chromosome 21       | chromosome 21         | NM_004928                            | NM_004928                  |
| 2.26E+02 | 7.82E+00  | chromosome 21       | chromosome 21         | NM_004928                            | NM_004928                  |
| 2.22E+02 | 7.79E+00  | laminin, alpha 5    | laminin, alpha 5      | NM_005560                            | NM_005560                  |
| 2.22E+02 | 7.79E+00  | laminin, alpha 5    | laminin, alpha 5      | NM_005560                            | NM_005560                  |
| 3.02E+02 | 8.24E+00  | nuclear factor I/)  | nuclear factor I/)    | NM_002501                            | NM_002501                  |
| 3.02E+02 | 8.24E+00  | nuclear factor I/)  | nuclear factor I/)    | NM_002501                            | NM_002501                  |
| 4.61E-03 | -7.76E+00 | kelch-like 35 (Drc  | kelch-like 35 (Drc    | NM_001039548                         | NM_001039548               |
| 2.29E+02 | 7.84E+00  | TATA box binding    | adenosine deami       | NM_139353,NM_139353,NM_005679        | NM_139353,NM_005679        |
| 2.61E+02 | 8.03E+00  | collagen, type VI,  | collagen, type VI,    | NM_001848                            | NM_001848                  |
| 2.61E+02 | 8.03E+00  | collagen, type VI,  | collagen, type VI,    | NM_001848                            | NM_001848                  |
| 2.90E+02 | 8.18E+00  | TGFB1-induced a     | crystallin, beta A    | NM_004740                            | NM_004740                  |
| 2.90E+02 | 8.18E+00  | espin-like          | kelch-like 30 (Drc    | NM_194312                            | NM_194312                  |
| 2.43E+02 | 7.92E+00  | ribonucleoprotei    | ribonucleoprotei      | NM_133452                            | NM_133452                  |
| 2.43E+02 | 7.92E+00  | ribonucleoprotei    | ribonucleoprotei      | NM_133452                            | NM_133452                  |
| 4.03E+02 | 8.65E+00  | chromosome 9 o      | chromosome 9 o        | NM_001004353                         | NM_001004353               |
| 2.83E+02 | 8.14E+00  | integrator compl    | integrator compl      | NM_001080453                         | NM_001080453               |
| 2.83E+02 | 8.14E+00  | integrator compl    | integrator compl      | NM_001080453                         | NM_001080453               |
| 2.83E+02 | 8.14E+00  | integrator compl    | integrator compl      | NM_001080453                         | NM_001080453               |
| 2.32E+02 | 7.86E+00  | testis-specific tra | testis-specific tra   | NR_003593,NR_(NR_003593,NR_001540    | NR_003593,NR_001540        |
| 2.32E+02 | 7.86E+00  | testis-specific tra | testis-specific tra   | NR_003593,NR_(NR_003593,NR_001540    | NR_003593,NR_001540        |
| 2.76E+02 | 8.11E+00  | zinc finger, DHH    | zinc finger, DHH      | NM_024786                            | NM_024786                  |
| 2.95E+02 | 8.21E+00  | chromosome 2 o      | chromosome 2 o        | NM_214461                            | NM_214461                  |
| 2.95E+02 | 8.21E+00  | chromosome 2 o      | chromosome 2 o        | NM_214461                            | NM_214461                  |
| 4.12E+02 | 8.69E+00  | slit homolog 1 (D   | slit homolog 1 (D     | NM_003061                            | NM_003061                  |
| 2.68E+02 | 8.06E+00  | sequestosome 1      | sequestosome 1        | NM_001142299                         | NM_001142299               |
| 2.50E+02 | 7.97E+00  | small nucleolar R   | small nucleolar R     | NR_003067                            | NR_003067                  |
| 4.45E-03 | -7.81E+00 | prostate stem ce    | lymphocyte anti       | NM_005672                            | NM_005672                  |
| 4.45E-03 | -7.81E+00 | prostate stem ce    | lymphocyte anti       | NM_005672                            | NM_005672                  |
| 3.06E+02 | 8.26E+00  | cyclin G associat   | cyclin G associat     | NM_005255                            | NM_005255                  |
| 3.77E+02 | 8.56E+00  | potassium chann     | potassium chann       | NM_020822                            | NM_020822                  |
| 3.77E+02 | 8.56E+00  | potassium chann     | potassium chann       | NM_020822                            | NM_020822                  |
| 4.40E-03 | -7.83E+00 | insulin receptor    | Rho/Rac guanine       | NM_001079817, NM_001079817,NM_000208 | NM_001079817,NM_000208     |
| 2.36E+02 | 7.88E+00  | OTU domain con      | OTU domain con        | NM_001145373                         | NM_001145373               |
| 2.33E+02 | 7.87E+00  | DEAD/H (Asp-Glu     | killer cell lectin-li | NM_004400                            | NM_004400                  |
| 2.43E+02 | 7.92E+00  | chromosome 10 La    | ribonucleopro         | NR_027152,NR_(NR_027152,NR_027151    | NR_027152,NR_027151        |
| 2.43E+02 | 7.92E+00  | chromosome 10 La    | ribonucleopro         | NR_027152,NR_(NR_027152,NR_027151    | NR_027152,NR_027151        |
| 3.71E+02 | 8.54E+00  | acetylserotonin     | acetylserotonin       | (NM_004192                           | NM_004192                  |
| 3.71E+02 | 8.54E+00  | acetylserotonin     | acetylserotonin       | (NM_004192                           | NM_004192                  |
| 3.10E+02 | 8.28E+00  | STEAP family me     | STEAP family me       | NM_018234,NM_018234,NM_182915,NM_001 | NM_018234,NM_182915,NM_001 |
| 3.10E+02 | 8.28E+00  | STEAP family me     | STEAP family me       | NM_018234,NM_018234,NM_182915,NM_001 | NM_018234,NM_182915,NM_001 |
| 3.12E+02 | 8.29E+00  | melanoma antig      | melanoma antig        | NM_005365                            | NM_005365                  |
| 2.47E+02 | 7.95E+00  | polycystic kidney   | polycystic kidney     | NM_000296,NM_000296,NM_001009944     | NM_000296,NM_001009944     |
| 2.32E+02 | 7.86E+00  | chromosome 21       | chromosome 21         | NM_198155,NM_198155,NM_004649        | NM_198155,NM_004649        |
| 3.02E+02 | 8.24E+00  | TP53 target 3       | solute carrier fan    | NM_016212                            | NM_016212                  |
| 2.21E+02 | 7.79E+00  | carbohydrate (ch    | LFNG O-fucosylp       | NM_018641                            | NM_018641                  |
| 4.70E-03 | -7.73E+00 | acyl-CoA binding    | chromosome 10         | NM_001039844                         | NM_001039844               |
| 3.59E-03 | -8.12E+00 | TRAF family men     | proteasome (pro       | NM_133484,NM_133484,NM_004180        | NM_133484,NM_004180        |
| 2.25E+02 | 7.81E+00  | gamma-glutamyl      | ankyrin repeat di     | NR_003503                            | NR_003503                  |
| 4.38E-03 | -7.83E+00 | tumor protein p5    | Rho GTPase activ      | NM_022112                            | NM_022112                  |
| 2.28E+02 | 7.83E+00  | intersectin 2       | nuclear receptor      | NM_147152                            | NM_147152                  |
| 2.46E+02 | 7.94E+00  | hyperpolarizatio    | hyperpolarizatio      | NM_001194                            | NM_001194                  |
| 2.46E+02 | 7.94E+00  | hyperpolarizatio    | hyperpolarizatio      | NM_001194                            | NM_001194                  |
| 2.60E+02 | 8.02E+00  | bol, boule-like     | (D phospholipase C-   | NM_033030,NM_033030,NM_197970        | NM_033030,NM_197970        |
| 3.18E+02 | 8.31E+00  | plexin B2           | plexin B2             | NM_012401                            | NM_012401                  |
| 2.87E+02 | 8.16E+00  | CD70 molecule       | tumor necrosis f:     | NM_001252                            | NM_001252                  |
| 2.87E+02 | 8.16E+00  | CD70 molecule       | tumor necrosis f:     | NM_001252                            | NM_001252                  |
| 4.07E+02 | 8.67E+00  | rhomboid 5 hom      | rhomboid 5 hom        | NM_022450                            | NM_022450                  |
| 2.76E+02 | 8.11E+00  | upstream binding    | tripartite motif-c    | NM_001101321                         | NM_001101321               |

|          |           |                                       |                                      |              |
|----------|-----------|---------------------------------------|--------------------------------------|--------------|
| 2.76E+02 | 8.11E+00  | upstream binding tripartite motif-c   | NM_001101321                         | NM_001101321 |
| 2.90E+02 | 8.18E+00  | solute carrier fan solute carrier fan | NM_207348                            | NM_207348    |
| 2.60E+02 | 8.02E+00  | tumor necrosis f; tumor necrosis f;   | NM_148970,NM_148970,NM_148967,NM_148 |              |
| 3.37E+02 | 8.40E+00  | TNFSF12-TNFSF1 TNFSF12-TNFSF1         | NM_172089                            | NM_172089    |
| 3.05E+02 | 8.25E+00  | coiled-coil domain coiled-coil domain | NM_001143980                         | NM_001143980 |
| 3.05E+02 | 8.25E+00  | coiled-coil domain chloride channel   | NM_001143980                         | NM_001143980 |
| 2.50E+02 | 7.96E+00  | tumor necrosis f; tumor necrosis f;   | NM_172014,NM_172014,NM_003807        |              |
| 2.30E+02 | 7.84E+00  | hypothetical LOC hypothetical LOC     | NR_026658                            | NR_026658    |
| 4.21E-03 | -7.89E+00 | regulator of calci chloride intracell | NM_004414,NM_004414,NM_203417,NM_203 |              |
| 2.11E+02 | 7.72E+00  | chromosome 9 o chromosome 9 o         | NM_152571                            | NM_152571    |
| 2.13E+02 | 7.74E+00  | dishevelled, dsh   matrix-remodell    | NM_004421                            | NM_004421    |
| 2.62E+02 | 8.03E+00  | polymerase (DN/ polymerase (DN/       | NM_002691                            | NM_002691    |
| 2.62E+02 | 8.03E+00  | polymerase (DN/ polymerase (DN/       | NM_002691                            | NM_002691    |
| 2.62E+02 | 8.03E+00  | polymerase (DN/ Spi-B transcriptic    | NM_002691                            | NM_002691    |
| 3.63E-03 | -8.10E+00 | synaptotagmin X asparagine-linker     | NM_198992                            | NM_198992    |
| 4.16E-03 | -7.91E+00 | Fc fragment of Ig Fc fragment of Ig   | NM_000570                            | NM_000570    |
| 4.16E-03 | -7.91E+00 | Fc fragment of Ig Fc fragment of Ig   | NM_000570                            | NM_000570    |
| 2.76E+02 | 8.11E+00  | nuclear factor I/ nuclear factor I/   | NM_002501                            | NM_002501    |
| 2.74E+02 | 8.10E+00  | ring finger protei oligonucleotide/   | NM_005785,NM_005785,NM_194358,NM_194 |              |
| 3.06E+02 | 8.26E+00  | metastasis assoc metastasis assoc     | NM_004689                            | NM_004689    |
| 3.06E+02 | 8.26E+00  | metastasis assoc metastasis assoc     | NM_004689                            | NM_004689    |
| 3.32E-03 | -8.23E+00 | basic transcriptic ceroid-lipofuscin  | NR_026983                            | NR_026983    |
| 3.63E-03 | -8.10E+00 | cannabinoid rece pleckstrin           | NM_015463                            | NM_015463    |
| 2.71E+02 | 8.08E+00  | hypothetical LOC FXVD domain cor      | NR_024561                            | NR_024561    |
| 2.64E+02 | 8.04E+00  | asparagine-linker asparagine-linker   | NM_032834                            | NM_032834    |
| 2.64E+02 | 8.04E+00  | asparagine-linker asparagine-linker   | NM_032834                            | NM_032834    |
| 2.08E+02 | 7.70E+00  | deoxythymidylat inhibitor of grow     | NM_012145                            | NM_012145    |
| 2.08E+02 | 7.70E+00  | deoxythymidylat inhibitor of grow     | NM_012145                            | NM_012145    |
| 4.17E+02 | 8.70E+00  | zinc finger protei zinc finger protei | NM_001007248                         | NM_001007248 |
| 2.59E+02 | 8.02E+00  | v-ets erythroblas Friend leukemia     | NM_005238,NM_005238,NM_001143820     |              |
| 5.34E-03 | -7.55E+00 | guanylate cyclase arachidonate 15-    | NM_000180                            | NM_000180    |
| 5.57E-03 | -7.49E+00 | MER1 repeat cor ubiquitin specific    | NR_024059                            | NR_024059    |
| 5.57E-03 | -7.49E+00 | MER1 repeat cor ubiquitin specific    | NR_024059                            | NR_024059    |
| 2.90E+02 | 8.18E+00  | glycosylphosphat glycosylphosphat     | NM_178172                            | NM_178172    |
| 4.19E-03 | -7.90E+00 | OTU domain con vacuolar protein       | NM_020205                            | NM_020205    |
| 4.19E-03 | -7.90E+00 | OTU domain con vacuolar protein       | NM_020205                            | NM_020205    |
| 4.53E-03 | -7.78E+00 | sulfiredoxin 1 scratch homolog        | NM_080725                            | NM_080725    |
| 4.53E-03 | -7.78E+00 | sulfiredoxin 1 scratch homolog        | NM_080725                            | NM_080725    |
| 3.77E-03 | -8.05E+00 | solute carrier fan hypoxia up-regul   | NM_001467                            | NM_001467    |
| 3.77E-03 | -8.05E+00 | solute carrier fan hypoxia up-regul   | NM_001467                            | NM_001467    |
| 2.16E+02 | 7.76E+00  | solute carrier fan solute carrier fan | NR_002593                            | NR_002593    |
| 2.16E+02 | 7.76E+00  | solute carrier fan sialophorin        | NR_002593                            | NR_002593    |
| 4.06E-03 | -7.94E+00 | Janus kinase 1 adenylate kinase       | NM_002227                            | NM_002227    |
| 2.13E+02 | 7.74E+00  | grainyhead-like 2 grainyhead-like 2   | NM_024915                            | NM_024915    |
| 3.88E+02 | 8.60E+00  | low density lipop adrenergic, alph;   | NM_002337                            | NM_002337    |
| 3.20E-03 | -8.29E+00 | hypothetical LOC zinc finger protei   | NR_024484                            | NR_024484    |
| 3.20E-03 | -8.29E+00 | hypothetical LOC zinc finger protei   | NR_024484                            | NR_024484    |
| 1.69E+00 | 7.61E-01  | TBC1 domain fan family with sequi     | NM_014346                            | NM_014346    |
| 3.01E+02 | 8.23E+00  | clathrin, heavy cl clathrin, heavy cl | NM_007098                            | NM_007098    |
| 2.26E+02 | 7.82E+00  | ribosomal protei NADH dehydroge       | NM_005061                            | NM_005061    |
| 2.26E+02 | 7.82E+00  | ribosomal protei NADH dehydroge       | NM_005061                            | NM_005061    |
| 2.08E+02 | 7.70E+00  | lipocalin 6 lipocalin 6               | NM_198946                            | NM_198946    |
| 2.08E+02 | 7.70E+00  | lipocalin 6 lipocalin 6               | NM_198946                            | NM_198946    |
| 4.52E-03 | -7.79E+00 | fatty acid binding threonine syntha   | NM_001443                            | NM_001443    |
| 2.82E+02 | 8.14E+00  | solute carrier fan solute carrier fan | NM_003041                            | NM_003041    |
| 2.82E+02 | 8.14E+00  | solute carrier fan solute carrier fan | NM_003041                            | NM_003041    |
| 2.67E+02 | 8.06E+00  | dipeptidase 3 dipeptidase 2           | NM_022357,NM_022357,NM_001129758     |              |
| 2.67E+02 | 8.06E+00  | dipeptidase 3 dipeptidase 2           | NM_022357,NM_022357,NM_001129758     |              |



|          |           |                                        |               |                             |
|----------|-----------|----------------------------------------|---------------|-----------------------------|
| 2.41E+02 | 7.91E+00  | N-acetylneurami zinc finger protei     | NM_152667     | NM_152667                   |
| 4.68E-03 | -7.74E+00 | coiled-coil domai chromosome 7 o       | NM_194300     | NM_194300                   |
| 4.27E-03 | -7.87E+00 | anterior gradient anterior gradient    | NM_006408     | NM_006408                   |
| 2.66E+02 | 8.05E+00  | syndecan binding syndecan binding      | NM_080489,NM  | NM_080489,NM_015685         |
| 2.08E+02 | 7.70E+00  | family with sequi FSHD region gen      | NR_024241     | NR_024241                   |
| 2.08E+02 | 7.70E+00  | family with sequi FSHD region gen      | NR_024241     | NR_024241                   |
| 2.58E+02 | 8.01E+00  | transducin (beta) transducin (beta)    | NM_006453     | NM_006453                   |
| 2.56E+02 | 8.00E+00  | acidic repeat con acidic repeat con    | NM_052957     | NM_052957                   |
| 2.06E+02 | 7.68E+00  | KN motif and an KN motif and an        | NM_198471     | NM_198471                   |
| 2.06E+02 | 7.68E+00  | KN motif and an KN motif and an        | NM_198471     | NM_198471                   |
| 4.80E-03 | -7.70E+00 | glycosyltransfera lipocalin 9          | NM_182974     | NM_182974                   |
| 2.22E+02 | 7.79E+00  | cannabinoid rece RNA guanylyltrar      | NM_033181,NM  | NM_033181,NM_016083         |
| 2.22E+02 | 7.79E+00  | cannabinoid rece RNA guanylyltrar      | NM_033181,NM  | NM_033181,NM_016083         |
| 2.60E+02 | 8.02E+00  | glycogen synthas glycogen synthas      | NM_002103     | NM_002103                   |
| 3.97E-03 | -7.98E+00 | solute carrier fan zinc finger protei  | NM_024628     | NM_024628                   |
| 2.52E+02 | 7.98E+00  | hypothetical LOC zinc finger protei    | NR_024497     | NR_024497                   |
| 2.18E+02 | 7.77E+00  | SWI/SNF related, SWI/SNF related,      | NM_001128846, | NM_001128846,NM_001128848,N |
| 2.18E+02 | 7.77E+00  | SWI/SNF related, SWI/SNF related,      | NM_001128846, | NM_001128846,NM_001128848,N |
| 2.44E+02 | 7.93E+00  | PHD finger prote PHD finger prote      | NM_153812     | NM_153812                   |
| 2.09E+02 | 7.70E+00  | elastin microfibri elastin microfibri  | NM_032048     | NM_032048                   |
| 2.09E+02 | 7.70E+00  | elastin microfibri elastin microfibri  | NM_032048     | NM_032048                   |
| 2.67E+02 | 8.06E+00  | immunoglobulin immunoglobulin          | NM_014987     | NM_014987                   |
| 2.67E+02 | 8.06E+00  | immunoglobulin immunoglobulin          | NM_014987     | NM_014987                   |
| 2.67E+02 | 8.06E+00  | immunoglobulin immunoglobulin          | NM_014987     | NM_014987                   |
| 2.67E+02 | 8.06E+00  | immunoglobulin immunoglobulin          | NM_014987     | NM_014987                   |
| 2.58E+02 | 8.01E+00  | OTU domain, ubi MACRO domain           | NM_017670,NR_ | NM_017670,NR_003089         |
| 2.58E+02 | 8.01E+00  | MACRO domain MACRO domain              | NM_014067     | NM_014067                   |
| 2.58E+02 | 8.01E+00  | MACRO domain MACRO domain              | NM_014067     | NM_014067                   |
| 3.98E+02 | 8.64E+00  | glutamate-rich 1 discs, large (Dros    | NM_207332     | NM_207332                   |
| 4.53E-03 | -7.78E+00 | solute carrier fan sialic acid binding | NM_001146037  | NM_001146037                |
| 3.17E-03 | -8.30E+00 | arachidonate 12- arachidonate 12-      | NR_002710     | NR_002710                   |
| 2.91E+02 | 8.19E+00  | calcium-sensing calcium-sensing        | NM_000388     | NM_000388                   |
| 2.91E+02 | 8.19E+00  | calcium-sensing calcium-sensing        | NM_000388     | NM_000388                   |
| 3.62E-03 | -8.11E+00 | protocadherin ga protocadherin ga      | NM_018927,NM  | NM_018927,NM_032101         |
| 2.65E+02 | 8.05E+00  | chromosome 16 chromosome 16            | NM_004913     | NM_004913                   |
| 4.02E-03 | -7.96E+00 | protein phosphai galanin preprope      | NM_018312     | NM_018312                   |
| 4.47E-03 | -7.81E+00 | acyloxyacyl hydr engulfment and        | NM_001637     | NM_001637                   |
| 2.70E+02 | 8.07E+00  | chromosome 12 chromosome 12            | NM_032848     | NM_032848                   |
| 3.44E-03 | -8.18E+00 | regulatory factor regulatory factor    | NM_213594     | NM_213594                   |
| 3.37E+02 | 8.40E+00  | chromosome 1 o tubulin tyrosine I      | NM_017891     | NM_017891                   |
| 3.71E+02 | 8.54E+00  | cadherin, EGF LA cadherin, EGF LA      | NM_014246     | NM_014246                   |
| 3.71E+02 | 8.54E+00  | cadherin, EGF LA cadherin, EGF LA      | NM_014246     | NM_014246                   |
| 2.48E+02 | 7.95E+00  | notum pectinace alveolar soft part     | NM_178493     | NM_178493                   |
| 3.77E-03 | -8.05E+00 | sec1 family dom coagulation fact       | NM_016106,NM  | NM_016106,NM_182835         |
| 2.33E+02 | 7.87E+00  | null golgin A8 family, null            | null          | null                        |
| 2.33E+02 | 7.87E+00  | null golgin A8 family, null            | null          | null                        |
| 4.85E+02 | 8.92E+00  | ring finger protei ring finger protei  | NM_020914     | NM_020914                   |
| 3.03E+02 | 8.24E+00  | arginine vasopre: arginine vasopre     | NR_027419     | NR_027419                   |
| 3.03E+02 | 8.24E+00  | arginine vasopre: arginine vasopre     | NR_027419     | NR_027419                   |
| 3.34E+02 | 8.38E+00  | taste receptor, ty taste receptor, ty  | NM_152228     | NM_152228                   |
| 3.34E+02 | 8.38E+00  | taste receptor, ty taste receptor, ty  | NM_152228     | NM_152228                   |
| 3.34E+02 | 8.38E+00  | taste receptor, ty taste receptor, ty  | NM_152228     | NM_152228                   |
| 2.90E+02 | 8.18E+00  | apoptosis-associ: apoptosis-associ:    | NM_001080395  | NM_001080395                |
| 2.86E+02 | 8.16E+00  | ribosomal protei zinc finger protei    | NM_000973,NM  | NM_000973,NM_033301         |
| 2.52E+02 | 7.98E+00  | integrin beta 1 bi death-associated    | NM_170678     | NM_170678                   |
| 2.52E+02 | 7.98E+00  | death-associated death-associated      | NM_001348     | NM_001348                   |
| 2.80E+02 | 8.13E+00  | GDNF family rece GDNF family rece      | NM_001496     | NM_001496                   |
| 2.80E+02 | 8.13E+00  | GDNF family rece GDNF family rece      | NM_001496     | NM_001496                   |

|          |           |                                       |                            |                            |
|----------|-----------|---------------------------------------|----------------------------|----------------------------|
| 2.08E+02 | 7.70E+00  | tumor necrosis f; chromosome 1 o      | NM_003820                  | NM_003820                  |
| 2.08E+02 | 7.70E+00  | tumor necrosis f; chromosome 1 o      | NM_003820                  | NM_003820                  |
| 2.22E+02 | 7.79E+00  | xylosyltransferas polycystic kidney   | NM_022166                  | NM_022166                  |
| 2.22E+02 | 7.79E+00  | xylosyltransferas polycystic kidney   | NM_022166                  | NM_022166                  |
| 3.39E+02 | 8.41E+00  | collagen, type VI, collagen, type VI  | NM_001848                  | NM_001848                  |
| 3.39E+02 | 8.41E+00  | collagen, type VI, collagen, type VI  | NM_001848                  | NM_001848                  |
| 2.29E+02 | 7.84E+00  | arginine vasopre: arginine vasopre    | NM_000490                  | NM_000490                  |
| 3.07E+02 | 8.26E+00  | NADH dehydroge; YjeF N-terminal c     | NM_015965                  | NM_015965                  |
| 4.21E-03 | -7.89E+00 | RELT-like 1 phosphoglucomi            | NM_001085400               | NM_001085400               |
| 2.72E+02 | 8.09E+00  | forkhead box Q1 forkhead box F2       | NM_033260                  | NM_033260                  |
| 3.37E+02 | 8.40E+00  | calcium homeost calcium homeost       | NM_001129742               | NM_001129742               |
| 3.37E+02 | 8.40E+00  | calcium homeost calcium homeost       | NM_001129742               | NM_001129742               |
| 4.35E-03 | -7.84E+00 | solute carrier fan solute carrier fan | NM_020346                  | NM_020346                  |
| 4.35E-03 | -7.84E+00 | solute carrier fan solute carrier fan | NM_020346                  | NM_020346                  |
| 2.63E+02 | 8.04E+00  | coiled-coil domai coiled-coil doma    | NM_178173                  | NM_178173                  |
| 2.63E+02 | 8.04E+00  | coiled-coil domai coiled-coil doma    | NM_001135197               | NM_001135197               |
| 3.04E+02 | 8.25E+00  | proline rich 14 fibrosin              | NM_024031                  | NM_024031                  |
| 3.04E+02 | 8.25E+00  | fibrosin fibrosin                     | NM_001105079               | NM_001105079               |
| 2.63E+02 | 8.04E+00  | transforming gro transforming gro     | NM_015927                  | NM_015927                  |
| 2.63E+02 | 8.04E+00  | transforming gro transforming gro     | NM_015927                  | NM_015927                  |
| 4.52E-03 | -7.79E+00 | transglutaminase; transglutaminase    | NM_201631,NM_004245        | NM_201631,NM_004245        |
| 2.34E+02 | 7.87E+00  | cordon-bleu horr POM121 membr         | NM_015198                  | NM_015198                  |
| 2.34E+02 | 7.87E+00  | POM121 membr POM121 membr             | NM_182595                  | NM_182595                  |
| 2.28E+02 | 7.83E+00  | chromosome 11 chromosome 11           | NM_145013                  | NM_145013                  |
| 3.99E+02 | 8.64E+00  | protein arginine protein arginine     | NM_198318,NM_198319,NM_001 | NM_198318,NM_198319,NM_001 |
| 2.49E+02 | 7.96E+00  | ring finger protei maternal embryc    | NM_194330,NM_194332,NM_194 | NM_194330,NM_194332,NM_194 |
| 2.49E+02 | 7.96E+00  | ring finger protei maternal embryc    | NM_194330,NM_194332,NM_194 | NM_194330,NM_194332,NM_194 |
| 2.73E+02 | 8.09E+00  | tripartite motif-c tripartite motif-c | NM_001146208, NM_001145126 | NM_001146208, NM_001145126 |
| 2.73E+02 | 8.09E+00  | tripartite motif-c tripartite motif-c | NM_001146208, NM_001145126 | NM_001146208, NM_001145126 |
| 2.73E+02 | 8.09E+00  | tripartite motif-c tripartite motif-c | NM_001146208, NM_001145126 | NM_001146208, NM_001145126 |
| 2.73E+02 | 8.09E+00  | tripartite motif-c tripartite motif-c | NM_001146208, NM_001145126 | NM_001146208, NM_001145126 |
| 3.10E+02 | 8.27E+00  | autoimmune reg autoimmune reg         | NM_000658                  | NM_000658                  |
| 3.10E+02 | 8.27E+00  | autoimmune reg autoimmune reg         | NM_000658                  | NM_000658                  |
| 3.20E+02 | 8.32E+00  | zinc finger and S( zinc finger and S( | NM_182572                  | NM_182572                  |
| 2.89E+02 | 8.17E+00  | mahogunin, ring mahogunin, ring       | NM_015246,NM_001142289,NM_ | NM_015246,NM_001142289,NM_ |
| 4.64E-03 | -7.75E+00 | membrane-spani membrane-spani         | NM_001098835, NM_152717    | NM_001098835, NM_152717    |
| 2.12E+02 | 7.73E+00  | SRC kinase signal SRC kinase signal   | NM_025248                  | NM_025248                  |
| 2.12E+02 | 7.73E+00  | poly(A) binding p protocadherin 1;    | NM_001114734               | NM_001114734               |
| 4.48E-03 | -7.80E+00 | TBC1 (tre-2/USP( TBC1 (tre-2/USP(     | NM_015173                  | NM_015173                  |
| 4.48E-03 | -7.80E+00 | pituitary tumor-t pituitary tumor-t   | NM_006607                  | NM_006607                  |
| 2.28E+02 | 7.83E+00  | SPARC related m SPARC related m       | NM_022138                  | NM_022138                  |
| 2.06E+02 | 7.68E+00  | RAN binding prot zinc finger, DHH(    | NM_002882                  | NM_002882                  |
| 3.79E+02 | 8.57E+00  | chromosome 14 chromosome 14           | NM_001134875, NM_001134876 | NM_001134875, NM_001134876 |
| 3.88E+02 | 8.60E+00  | kallikrein-related kallikrein-related | NM_007196,NM_144507,NM_144 | NM_007196,NM_144507,NM_144 |
| 3.45E+02 | 8.43E+00  | death-associated death-associated     | NM_001348                  | NM_001348                  |
| 3.45E+02 | 8.43E+00  | death-associated death-associated     | NM_001348                  | NM_001348                  |
| 3.45E+02 | 8.43E+00  | death-associated death-associated     | NM_001348                  | NM_001348                  |
| 4.32E-03 | -7.86E+00 | suppression of tu chromosome 11       | NM_213618,NM_139157,NM_005 | NM_213618,NM_139157,NM_005 |
| 2.39E+02 | 7.90E+00  | zinc finger, FYVE zinc finger, FYVE   | NM_020972                  | NM_020972                  |
| 3.00E+02 | 8.23E+00  | CCAAT/enhancer protein tyrosine       | NM_005194                  | NM_005194                  |
| 3.00E+02 | 8.23E+00  | CCAAT/enhancer protein tyrosine       | NM_005194                  | NM_005194                  |
| 3.00E+02 | 8.23E+00  | CCAAT/enhancer protein tyrosine       | NM_005194                  | NM_005194                  |
| 2.05E+02 | 7.68E+00  | single-minded hc single-minded hc     | NM_005069,NM_009586        | NM_005069,NM_009586        |
| 2.67E+02 | 8.06E+00  | resistance to inhi resistance to inhi | NM_021932                  | NM_021932                  |
| 3.33E+02 | 8.38E+00  | chromosome 19 chromosome 19           | NM_175063,NM_206538        | NM_175063,NM_206538        |
| 2.19E+02 | 7.78E+00  | early B-cell facto early B-cell facto | NM_001005463               | NM_001005463               |
| 3.22E+02 | 8.33E+00  | solute carrier fan solute carrier fan | NM_020246                  | NM_020246                  |
| 3.22E+02 | 8.33E+00  | solute carrier fan solute carrier fan | NM_020246                  | NM_020246                  |

|          |           |                                    |                     |                                             |              |
|----------|-----------|------------------------------------|---------------------|---------------------------------------------|--------------|
| 3.22E+02 | 8.33E+00  | solute carrier fan                 | solute carrier fan  | NM_020246                                   | NM_020246    |
| 3.22E+02 | 8.33E+00  | solute carrier fan                 | solute carrier fan  | NM_020246                                   | NM_020246    |
| 2.14E+02 | 7.74E+00  | NADPH oxidase                      | AT rich interactiv  | NM_015718                                   | NM_015718    |
| 3.27E+02 | 8.35E+00  | nuclear factor of CTD (carboxy-ter |                     | NM_172387,NM_172387,NM_172389               |              |
| 3.27E+02 | 8.35E+00  | nuclear factor of CTD (carboxy-ter |                     | NM_172387,NM_172387,NM_172389               |              |
| 4.10E+02 | 8.68E+00  | 1-acylglycerol-3-                  | 1-acylglycerol-3-   | NM_020132                                   | NM_020132    |
| 2.56E+02 | 8.00E+00  | glutamate recept                   | glutamate recept    | NM_138690                                   | NM_138690    |
| 2.56E+02 | 8.00E+00  | chromosome 19                      | chromosome 19       | NM_001033026, NM_001033026, NM_033420       |              |
| 2.56E+02 | 8.00E+00  | chromosome 19                      | chromosome 19       | NM_001033026, NM_001033026, NM_033420       |              |
| 2.56E+02 | 8.00E+00  | chromosome 19                      | chromosome 19       | NM_001033026, NM_001033026, NM_033420       |              |
| 2.56E+02 | 8.00E+00  | chromosome 19                      | chromosome 19       | NM_001033026, NM_001033026, NM_033420       |              |
| 2.56E+02 | 8.00E+00  | chromosome 19                      | chromosome 19       | NM_001033026, NM_001033026, NM_033420       |              |
| 4.71E+02 | 8.88E+00  | FAT tumor suppr                    | melatonin recept    | NM_001008781                                | NM_001008781 |
| 2.70E+02 | 8.08E+00  | developmental p                    | developmental p     | NM_138815                                   | NM_138815    |
| 2.14E+02 | 7.74E+00  | hypothetical LOC                   | zinc finger protei  | NR_024497                                   | NR_024497    |
| 2.38E+02 | 7.90E+00  | proline rich 23A                   | proline rich 23A    | NM_001134659                                | NM_001134659 |
| 2.38E+02 | 7.90E+00  | proline rich 23A                   | proline rich 23A    | NM_001134659                                | NM_001134659 |
| 2.59E+02 | 8.02E+00  | family with sequi                  | golgin A6 family-   | NM_001008226                                | NM_001008226 |
| 2.25E+02 | 7.81E+00  | cyclin-dependent                   | cyclin-dependen     | NM_002596, NM_002596, NM_212503, NM_212     |              |
| 2.25E+02 | 7.81E+00  | cyclin-dependent                   | cyclin-dependen     | NM_002596, NM_002596, NM_212503, NM_212     |              |
| 2.37E+02 | 7.89E+00  | agrin                              | chromosome 1 o      | NM_198576                                   | NM_198576    |
| 5.20E-03 | -7.59E+00 | chromosome 10                      | chromosome 10       | NM_032333                                   | NM_032333    |
| 2.91E+02 | 8.19E+00  | solute carrier fan                 | solute carrier fan  | NM_001080431                                | NM_001080431 |
| 2.91E+02 | 8.19E+00  | solute carrier fan                 | solute carrier fan  | NM_001080431                                | NM_001080431 |
| 2.18E+02 | 7.77E+00  | netrin 5                           | netrin 5            | NM_145807                                   | NM_145807    |
| 2.18E+02 | 7.77E+00  | netrin 5                           | netrin 5            | NM_145807                                   | NM_145807    |
| 3.10E+02 | 8.28E+00  | hypothetical LOC                   | calcium channel,    | NR_024341                                   | NR_024341    |
| 4.19E+02 | 8.71E+00  | chorionic gonad                    | chorionic gonad     | NM_033378                                   | NM_033378    |
| 3.73E-03 | -8.07E+00 | membrane prote                     | chromosome 17       | NM_005374                                   | NM_005374    |
| 2.90E+02 | 8.18E+00  | pannexin 2                         | TraB domain con     | NM_052839                                   | NM_052839    |
| 3.10E+02 | 8.27E+00  | interferon stimul                  | aggreca             | NM_002201                                   | NM_002201    |
| 3.10E+02 | 8.27E+00  | interferon stimul                  | aggreca             | NM_002201                                   | NM_002201    |
| 3.08E+02 | 8.27E+00  | G-protein signal                   | ii G-protein signal | ii NM_001145638, NM_001145638, NM_015597    |              |
| 4.24E-03 | -7.88E+00 | OTU domain con                     | OTU domain con      | NM_130901                                   | NM_130901    |
| 3.56E+02 | 8.48E+00  | phosphatidylinos                   | phosphatidylinos    | NM_012398                                   | NM_012398    |
| 2.49E+02 | 7.96E+00  | tektin 4                           | tektin 4            | NM_144705                                   | NM_144705    |
| 2.49E+02 | 7.96E+00  | tektin 4                           | tektin 4            | NM_144705                                   | NM_144705    |
| 2.28E+02 | 7.83E+00  | chromosome 12                      | chromosome 12       | NM_153685                                   | NM_153685    |
| 5.00E-03 | -7.64E+00 | zinc and ring fing                 | kelch repeat and    | NR_003502                                   | NR_003502    |
| 2.46E+02 | 7.94E+00  | syntaxin binding                   | resistin            | NM_006949, NM_006949, NM_001127396          |              |
| 2.46E+02 | 7.94E+00  | syntaxin binding                   | resistin            | NM_006949, NM_006949, NM_001127396          |              |
| 2.10E+02 | 7.72E+00  | SRY (sex determi                   | hypothetical LOC    | NM_014587                                   | NM_014587    |
| 4.70E+02 | 8.88E+00  | potassium inwar                    | cytohesin 2         | NM_170720                                   | NM_170720    |
| 4.47E-03 | -7.81E+00 | frequently rearra                  | frequently rearra   | NM_005479                                   | NM_005479    |
| 3.02E+02 | 8.24E+00  | core-binding fact                  | core-binding fact   | NM_175931, NM_175931, NM_005187             |              |
| 3.36E-03 | -8.22E+00 | chromosome 1 o                     | chromosome 1 o      | NM_182581                                   | NM_182581    |
| 4.30E+02 | 8.75E+00  | receptor-interact                  | receptor-interact   | NM_020639                                   | NM_020639    |
| 2.80E+02 | 8.13E+00  | BCL6 corepresso                    | BCL6 corepresso     | NM_001123383, NM_001123383, NM_001123384, N |              |
| 2.10E+02 | 7.72E+00  | interferon regula                  | interferon regula   | NM_015649                                   | NM_015649    |
| 2.29E+02 | 7.84E+00  | SRY (sex determi                   | chromosome 13       | NM_005986                                   | NM_005986    |
| 2.29E+02 | 7.84E+00  | SRY (sex determi                   | chromosome 13       | NM_005986                                   | NM_005986    |
| 2.32E+02 | 7.86E+00  | zinc finger protei                 | zinc finger protei  | NM_024836                                   | NM_024836    |
| 3.93E-03 | -7.99E+00 | chromosome 7 o                     | hypothetical pro    | NM_032120                                   | NM_032120    |
| 3.93E-03 | -7.99E+00 | hypothetical pro                   | hypothetical pro    | NR_026902                                   | NR_026902    |
| 3.80E+02 | 8.57E+00  | ankyrin repeat d                   | ankyrin repeat d    | NR_027270                                   | NR_027270    |
| 3.80E+02 | 8.57E+00  | ankyrin repeat d                   | lipase, member I    | NR_027270                                   | NR_027270    |
| 2.67E+02 | 8.06E+00  | DEAD/H (Asp-Glu                    | ribosomal protei    | NR_024005, NR_024005, NR_024004             |              |
| 2.70E+02 | 8.08E+00  | calcineurin bind                   | ii sushi domain cor | NM_012295                                   | NM_012295    |

|          |           |                                       |                                               |
|----------|-----------|---------------------------------------|-----------------------------------------------|
| 2.31E+02 | 7.85E+00  | cytochrome b-56 angiotensin I con     | NM_001017917, NM_001017917, NM_001017916, N   |
| 5.08E+02 | 8.99E+00  | WD repeat doma WD repeat doma         | NM_182552 NM_182552                           |
| 3.52E+02 | 8.46E+00  | TIMP metallopeç TIMP metallopeç       | NM_003255 NM_003255                           |
| 3.52E+02 | 8.46E+00  | TIMP metallopeç TIMP metallopeç       | NM_003255 NM_003255                           |
| 3.41E+02 | 8.41E+00  | golgin A8 family, golgin A8 family,   | NM_001023567, NM_001023567, NR_027410         |
| 2.50E+02 | 7.96E+00  | family with sequi chromosome 22       | NM_015381 NM_015381                           |
| 3.31E+02 | 8.37E+00  | tetra-peptide reç tetra-peptide reç   | NM_198479 NM_198479                           |
| 3.86E-03 | -8.02E+00 | B double prime 1 methylcrotonoyl      | NM_018429 NM_018429                           |
| 3.86E-03 | -8.02E+00 | B double prime 1 methylcrotonoyl      | NM_018429 NM_018429                           |
| 3.74E-03 | -8.06E+00 | chromosome 6 o sirtuin 5              | NM_033069 NM_033069                           |
| 2.66E+02 | 8.05E+00  | TBC1 domain fan TBC1 domain fan       | NM_019020 NM_019020                           |
| 2.75E+02 | 8.10E+00  | E74-like factor 4 apoptosis-inducii   | NM_001127197, NM_001127197, NM_001421         |
| 4.64E-03 | -7.75E+00 | Fc fragment of Ig Fc fragment of Ig   | NM_000569, NM_000569, NM_001127592, NM_000569 |
| 2.34E+02 | 7.87E+00  | --- nuclear factor I/ç                | NM_001145997 NM_001145997                     |
| 2.39E+02 | 7.90E+00  | mesoderm induc mesoderm induc         | NM_017550 NM_017550                           |
| 2.39E+02 | 7.90E+00  | mesoderm induc mesoderm induc         | NM_017550 NM_017550                           |
| 4.68E-03 | -7.74E+00 | intracisternal A p microtubule assc   | NM_005897 NM_005897                           |
| 4.70E-03 | -7.73E+00 | KIAA0101 thyroid hormone              | NM_014736, NM_014736, NM_001029989            |
| 3.84E-03 | -8.03E+00 | zinc finger protei chromosome 21      | NM_001098403, NM_001098403, NM_001098402, N   |
| 3.43E-03 | -8.19E+00 | ribonuclease, RN methyltransferas     | NM_002934 NM_002934                           |
| 3.43E-03 | -8.19E+00 | ribonuclease, RN methyltransferas     | NM_002934 NM_002934                           |
| 3.43E-03 | -8.19E+00 | ribonuclease, RN methyltransferas     | NM_002934 NM_002934                           |
| 2.86E+02 | 8.16E+00  | HOP homeobox HOP homeobox             | NM_139212, NM_139212, NM_001145460, NM_139212 |
| 2.52E+02 | 7.98E+00  | solute carrier fan methyltransferas   | NR_002594 NR_002594                           |
| 4.37E-03 | -7.84E+00 | cathepsin L1 cathepsin L famil        | NM_145918, NM_145918, NM_001912               |
| 4.76E+02 | 8.90E+00  | trinucleotide rep trinucleotide rep   | NM_001080495 NM_001080495                     |
| 4.76E+02 | 8.90E+00  | trinucleotide rep trinucleotide rep   | NM_001080495 NM_001080495                     |
| 2.36E+02 | 7.88E+00  | phosphodiestera A kinase (PRKA) :     | NM_173454, NM_173454, NM_002605               |
| 4.83E-03 | -7.69E+00 | golgi-associated nuclear undecap      | NM_020399, NM_020399, NM_001017408            |
| 4.83E-03 | -7.69E+00 | golgi-associated nuclear undecap      | NM_020399, NM_020399, NM_001017408            |
| 2.68E+02 | 8.06E+00  | gamma-aminobu gamma-aminobu           | NM_000815 NM_000815                           |
| 2.68E+02 | 8.06E+00  | gamma-aminobu gamma-aminobu           | NM_000815 NM_000815                           |
| 2.68E+02 | 8.06E+00  | gamma-aminobu gamma-aminobu           | NM_000815 NM_000815                           |
| 3.05E+02 | 8.25E+00  | chromosome 7 o chromosome 7 o         | NM_024067 NM_024067                           |
| 3.05E+02 | 8.25E+00  | chromosome 7 o chromosome 7 o         | NM_024067 NM_024067                           |
| 3.05E+02 | 8.25E+00  | chromosome 7 o chromosome 7 o         | NM_024067 NM_024067                           |
| 2.29E+02 | 7.84E+00  | dapper, antagoni dapper, antagoni     | NM_145056 NM_145056                           |
| 3.04E+02 | 8.25E+00  | dynein, axonema dynein, axonema       | NM_207437 NM_207437                           |
| 2.54E+02 | 7.99E+00  | potassium chann potassium chann       | NM_033310 NM_033310                           |
| 2.54E+02 | 7.99E+00  | potassium chann potassium chann       | NM_033310 NM_033310                           |
| 2.20E+02 | 7.78E+00  | metallothionein- metallothionein-     | NM_001039656 NM_001039656                     |
| 2.32E+02 | 7.86E+00  | 5-oxoprolinase (/ 5-oxoprolinase (/   | NM_017570 NM_017570                           |
| 3.45E+02 | 8.43E+00  | peroxisomal prol peroxisomal prol     | NM_001037335, NM_001037335, NM_033405         |
| 2.60E+02 | 8.02E+00  | fibroblast growthf fibroblast growthf | NM_022965, NM_022965, NM_000142               |
| 2.94E+02 | 8.20E+00  | immunity-relateç immunity-relateç     | NM_001007561 NM_001007561                     |
| 3.66E-03 | -8.10E+00 | melanoregulin peroxisomal tran        | NM_018000 NM_018000                           |
| 4.01E+02 | 8.65E+00  | IQ motif and Sec IQ motif and Sec     | NM_015232 NM_015232                           |
| 2.86E+02 | 8.16E+00  | hypothetical LOC 1-acylglycerol-3-    | NR_026961 NR_026961                           |
| 2.30E+02 | 7.85E+00  | KIAA0754 bone morphoger               | NM_015038 NM_015038                           |
| 2.30E+02 | 7.85E+00  | bone morphoger bone morphoger         | NM_181809 NM_181809                           |
| 2.46E+02 | 7.94E+00  | transmembrane transmembrane           | NM_032326 NM_032326                           |
| 2.46E+02 | 7.94E+00  | transmembrane transmembrane           | NM_032326 NM_032326                           |
| 2.93E+02 | 8.20E+00  | potassium voltag potassium voltag     | NM_012283 NM_012283                           |
| 5.02E-03 | -7.64E+00 | hypothetical LOC hypothetical LOC     | NR_027114 NR_027114                           |
| 5.02E-03 | -7.64E+00 | hypothetical LOC hypothetical LOC     | NR_027114 NR_027114                           |
| 2.39E+02 | 7.90E+00  | chromosome 11 chromosome 11           | NM_173573 NM_173573                           |
| 3.81E-03 | -8.04E+00 | discs, large homc 3-hydroxybutyra     | NM_004087, NM_004087, NM_001098424            |
| 3.43E-03 | -8.19E+00 | centrosomal pro quiescin Q6 sulfh     | NM_014810 NM_014810                           |

|          |           |                                         |                                           |              |
|----------|-----------|-----------------------------------------|-------------------------------------------|--------------|
| 2.63E+02 | 8.04E+00  | interleukin 11 transmembrane            | NM_000641                                 | NM_000641    |
| 2.38E+02 | 7.90E+00  | nuclear transcrip thioredoxin redu      | NM_006166                                 | NM_006166    |
| 3.91E+02 | 8.61E+00  | suppressor of vai suppressor of vai     | NM_032701                                 | NM_032701    |
| 3.91E+02 | 8.61E+00  | suppressor of vai suppressor of vai     | NM_032701                                 | NM_032701    |
| 3.91E+02 | 8.61E+00  | suppressor of vai suppressor of vai     | NM_032701                                 | NM_032701    |
| 2.20E+02 | 7.78E+00  | GTP binding prot protein phosphat       | NM_012227                                 | NM_012227    |
| 2.20E+02 | 7.78E+00  | GTP binding prot protein phosphat       | NM_012227                                 | NM_012227    |
| 2.38E+02 | 7.90E+00  | hypothetical LOC calcium channel,       | NR_024341                                 | NR_024341    |
| 3.69E+02 | 8.53E+00  | potassium voltag potassium voltag       | NM_172109                                 | NM_172109    |
| 2.37E+02 | 7.89E+00  | Rho GTPase activ Rho GTPase activ       | NM_144967                                 | NM_144967    |
| 2.84E+02 | 8.15E+00  | stabilin 1 stabilin 1                   | NM_015136                                 | NM_015136    |
| 2.13E+02 | 7.74E+00  | chromosome 14 POM121 membr              | NR_027006                                 | NR_027006    |
| 4.33E-03 | -7.85E+00 | Zic family memb Zic family memb         | NM_032153                                 | NM_032153    |
| 2.13E+02 | 7.74E+00  | excision repair cr excision repair cr   | NM_001130867                              | NM_001130867 |
| 2.13E+02 | 7.74E+00  | excision repair cr excision repair cr   | NM_001130867                              | NM_001130867 |
| 4.57E-03 | -7.77E+00 | Bardet-Biedl syn transient recept       | NM_018190                                 | NM_018190    |
| 3.26E+02 | 8.35E+00  | solute carrier fan solute carrier fan   | NM_006598                                 | NM_006598    |
| 3.26E+02 | 8.35E+00  | solute carrier fan solute carrier fan   | NM_006598                                 | NM_006598    |
| 3.79E-03 | -8.04E+00 | Wolf-Hirschhorn Wolf-Hirschhorn         | NM_133335,NM_133335,NM_133330,NM_133      |              |
| 3.79E-03 | -8.04E+00 | Wolf-Hirschhorn Wolf-Hirschhorn         | NM_133334                                 | NM_133334    |
| 2.33E+02 | 7.87E+00  | ring finger protei ring finger protei   | NM_194439,NM_194439,NM_001131034          |              |
| 3.76E-03 | -8.05E+00 | protocadherin 7 protocadherin 7         | NM_032457,NM_032457,NM_002589,NM_032      |              |
| 2.86E+02 | 8.16E+00  | chromosome 6 o hypothetical pro         | NR_026780                                 | NR_026780    |
| 2.56E+02 | 8.00E+00  | glioma tumor suj glioma tumor suj       | NM_015711                                 | NM_015711    |
| 3.98E-03 | -7.97E+00 | M-phase phosph chromosome 12            | NM_022782                                 | NM_022782    |
| 3.98E-03 | -7.97E+00 | M-phase phosph chromosome 12            | NM_022782                                 | NM_022782    |
| 3.91E-03 | -8.00E+00 | family with sequi par-6 partitionin     | NM_080829                                 | NM_080829    |
| 3.10E+02 | 8.27E+00  | COX19 cytochr cytochrome P45            | NM_001031617                              | NM_001031617 |
| 3.10E+02 | 8.27E+00  | cytochrome P45( cytochrome P45(         | NM_017781                                 | NM_017781    |
| 3.10E+02 | 8.27E+00  | cytochrome P45( cytochrome P45(         | NM_017781                                 | NM_017781    |
| 2.54E+02 | 7.99E+00  | tubulin, alpha 3e coiled-coil doma      | NM_207312                                 | NM_207312    |
| 2.59E+02 | 8.02E+00  | potassium voltag potassium voltag       | NM_172106,NM_172106,NM_172107,NM_172      |              |
| 3.31E+02 | 8.37E+00  | MAD1 mitotic ar MAD1 mitotic ar         | NM_003550,NM_003550,NM_001013837,NM_      |              |
| 3.31E+02 | 8.37E+00  | MAD1 mitotic ar MAD1 mitotic ar         | NM_003550,NM_003550,NM_001013837,NM_      |              |
| 2.71E+02 | 8.08E+00  | family with sequi family with sequi     | NM_174901                                 | NM_174901    |
| 2.41E+02 | 7.91E+00  | coiled-coil doma coiled-coil doma       | NM_001080433                              | NM_001080433 |
| 2.41E+02 | 7.91E+00  | BCL2/adenovirus Janus kinase and        | NM_004052                                 | NM_004052    |
| 3.25E+02 | 8.34E+00  | leucine rich repe leucine rich repe     | NM_022143                                 | NM_022143    |
| 2.62E+02 | 8.03E+00  | sema domain, irr sema domain, irr       | NM_020163                                 | NM_020163    |
| 2.62E+02 | 8.03E+00  | sema domain, irr sema domain, irr       | NM_020163                                 | NM_020163    |
| 3.37E+02 | 8.40E+00  | myomesin (M-pr CUB and Sushi m          | NM_003970                                 | NM_003970    |
| 2.30E+02 | 7.84E+00  | ArfGAP with GTP ArfGAP with GTP         | NM_031946,NM_031946,NM_001042535          |              |
| 2.30E+02 | 7.84E+00  | ArfGAP with GTP ArfGAP with GTP         | NM_031946,NM_031946,NM_001042535          |              |
| 3.21E-03 | -8.29E+00 | TSPY-like 5 metadherin                  | NM_033512                                 | NM_033512    |
| 3.55E+02 | 8.47E+00  | fizzy/cell division fizzy/cell division | NM_001136197, NM_001136197,NM_001136198   |              |
| 3.55E+02 | 8.47E+00  | fizzy/cell division chromosome 19       | NM_001136197, NM_001136197,NM_001136198   |              |
| 2.29E+02 | 7.84E+00  | ADP-ribosylation protein kinase C       | NM_001142293, NM_001142293,NM_014570      |              |
| 2.24E+02 | 7.81E+00  | glutathione pero glutathione pero       | NM_002085,NM_002085,NM_001039847          |              |
| 3.71E-03 | -8.07E+00 | ethanolamineph chromosome 2 o           | NM_033505                                 | NM_033505    |
| 3.73E-03 | -8.07E+00 | tripartite motif f tripartite motif f   | NM_173553                                 | NM_173553    |
| 2.26E+02 | 7.82E+00  | family with sequi family with sequi     | NM_001039762                              | NM_001039762 |
| 2.26E+02 | 7.82E+00  | family with sequi neuropeptide S        | NM_001039762                              | NM_001039762 |
| 2.71E+02 | 8.08E+00  | chromosome 7 o chromosome 7 o           | NM_001134395, NM_001134395,NM_001134396,N |              |
| 2.71E+02 | 8.08E+00  | chromosome 7 o chromosome 7 o           | NM_001134395, NM_001134395,NM_001134396,N |              |
| 2.51E+02 | 7.97E+00  | transmembrane aprataxin                 | NM_212558                                 | NM_212558    |
| 2.51E+02 | 7.97E+00  | transmembrane aprataxin                 | NM_212558                                 | NM_212558    |
| 2.75E+02 | 8.10E+00  | t-complex 10 hor chromosome 6 o         | NM_004610                                 | NM_004610    |
| 2.75E+02 | 8.10E+00  | t-complex 10 hor chromosome 6 o         | NM_004610                                 | NM_004610    |

|          |           |                                       |                                                                         |              |
|----------|-----------|---------------------------------------|-------------------------------------------------------------------------|--------------|
| 3.50E+02 | 8.45E+00  | lipoxigenase hor lipoxigenase hor     | NM_144612                                                               | NM_144612    |
| 2.24E+02 | 7.81E+00  | hepatoma-derive hepatoma-derive       | NM_032631,NM_032631,NM_001001520                                        |              |
| 2.93E+02 | 8.20E+00  | solute carrier fan ASMTL antisense    | NM_001636                                                               | NM_001636    |
| 2.93E+02 | 8.20E+00  | solute carrier fan ASMTL antisense    | NM_001636                                                               | NM_001636    |
| 2.93E+02 | 8.20E+00  | solute carrier fan ASMTL antisense    | NM_001636                                                               | NM_001636    |
| 4.03E-03 | -7.95E+00 | neural precursor regulatory factor    | NM_198400,NM_198400,NM_006154                                           |              |
| 2.87E+02 | 8.16E+00  | oncostatin M GATS protein-like        | NM_020530                                                               | NM_020530    |
| 2.70E+02 | 8.07E+00  | protein tyrosine family with sequ     | NM_015605,NM_015605,NM_001042364,NM_001042364,NM_001042364,NM_001042364 |              |
| 4.50E+02 | 8.81E+00  | POTE ankyrin doi POTE ankyrin doi     | NM_001005356, NR_027480                                                 |              |
| 2.59E-03 | -8.59E+00 | chromosome 2 o chromosome 2 o         | NM_032266                                                               | NM_032266    |
| 2.91E+02 | 8.19E+00  | zinc finger protei zinc finger protei | NM_207395                                                               | NM_207395    |
| 2.65E+02 | 8.05E+00  | ArfGAP with dua ArfGAP with dua       | NM_006869                                                               | NM_006869    |
| 2.65E+02 | 8.05E+00  | ArfGAP with dua ArfGAP with dua       | NM_006869                                                               | NM_006869    |
| 4.94E-03 | -7.66E+00 | salt-inducible kin chromosome 21      | NM_173354                                                               | NM_173354    |
| 2.91E+02 | 8.19E+00  | solute carrier fan solute carrier fan | NM_001040661, NM_001040661,NM_153247                                    |              |
| 2.91E+02 | 8.19E+00  | solute carrier fan solute carrier fan | NM_001040661, NM_001040661,NM_153247                                    |              |
| 2.05E+02 | 7.68E+00  | SR-related CTD-a SR-related CTD-a     | NM_021228                                                               | NM_021228    |
| 2.05E+02 | 7.68E+00  | SR-related CTD-a SR-related CTD-a     | NM_021228                                                               | NM_021228    |
| 3.98E+02 | 8.64E+00  | macrophage eryt macrophage eryt       | NM_005882,NM_005882,NM_001017405                                        |              |
| 2.52E+02 | 7.98E+00  | allantoicase SRY (sex determi         | NM_018436                                                               | NM_018436    |
| 3.22E+02 | 8.33E+00  | alpha-1-B glycop alpha-1-B glycop     | NM_130786                                                               | NM_130786    |
| 3.22E+02 | 8.33E+00  | A1BG antisense f A1BG antisense f     | NR_015380                                                               | NR_015380    |
| 3.00E+02 | 8.23E+00  | platelet endothe platelet endothe     | NM_001080471                                                            | NM_001080471 |
| 3.00E+02 | 8.23E+00  | platelet endothe platelet endothe     | NM_001080471                                                            | NM_001080471 |
| 4.13E-03 | -7.92E+00 | arginyl-tRNA syn arginyl-tRNA syn     | NM_020320                                                               | NM_020320    |
| 4.13E-03 | -7.92E+00 | arginyl-tRNA syn arginyl-tRNA syn     | NM_020320                                                               | NM_020320    |
| 2.10E+02 | 7.72E+00  | chromosome 14 transmembrane           | NM_001134875, NM_001134875,NM_001134876                                 |              |
| 2.10E+02 | 7.72E+00  | transmembrane transmembrane           | NM_025268                                                               | NM_025268    |
| 3.28E+02 | 8.36E+00  | glioma tumor suj glioma tumor suj     | NM_015710                                                               | NM_015710    |
| 3.28E+02 | 8.36E+00  | glioma tumor suj glioma tumor suj     | NM_015710                                                               | NM_015710    |
| 3.28E+02 | 8.36E+00  | glioma tumor suj glioma tumor suj     | NM_015710                                                               | NM_015710    |
| 2.32E+02 | 7.86E+00  | Prader-Willi regic Prader-Willi regic | NR_026647                                                               | NR_026647    |
| 2.60E+02 | 8.02E+00  | gap junction prot gap junction prot   | NM_006783,NM_006783,NM_001110221,NM_001110221,NM_001110221,NM_001110221 |              |
| 2.60E+02 | 8.02E+00  | gap junction prot crystallin, lambda: | NM_006783,NM_006783,NM_001110221,NM_001110221,NM_001110221,NM_001110221 |              |
| 3.02E+02 | 8.24E+00  | kinase suppresso kinase suppresso     | NM_173598                                                               | NM_173598    |
| 3.02E+02 | 8.24E+00  | kinase suppresso kinase suppresso     | NM_173598                                                               | NM_173598    |
| 2.78E+02 | 8.12E+00  | chromosome 21 non-protein codi        | NM_058190                                                               | NM_058190    |
| 2.31E+02 | 7.85E+00  | testis specific prc RNA binding mot   | NM_001077697                                                            | NM_001077697 |
| 2.31E+02 | 7.85E+00  | testis specific prc RNA binding mot   | NM_001077697                                                            | NM_001077697 |
| 4.12E-03 | -7.92E+00 | DMRT-like family DMRT-like family     | NM_032110                                                               | NM_032110    |
| 2.16E+02 | 7.76E+00  | placenta-specific placenta-specific   | NR_026740                                                               | NR_026740    |
| 1.73E+00 | 7.93E-01  | pseudouridylate E1A binding prot      | NM_001002020, NM_001002020,NM_025215,NM_025215,NM_025215,NM_025215      |              |
| 3.16E+02 | 8.30E+00  | bromodomain cc bromodomain cc         | NM_058243                                                               | NM_058243    |
| 3.16E+02 | 8.30E+00  | bromodomain cc bromodomain cc         | NM_058243                                                               | NM_058243    |
| 4.13E+02 | 8.69E+00  | zeta-chain (TCR) zeta-chain (TCR)     | NM_207519                                                               | NM_207519    |
| 2.26E+02 | 7.82E+00  | sema domain, tr; sema domain, tr;     | NM_030913                                                               | NM_030913    |
| 2.43E+02 | 7.92E+00  | stannin stannin                       | NM_003498                                                               | NM_003498    |
| 2.43E+02 | 7.92E+00  | stannin stannin                       | NM_003498                                                               | NM_003498    |
| 4.06E-03 | -7.94E+00 | AKT interacting p RPGRIP1-like        | NM_001012398, NM_001012398,NM_022476                                    |              |
| 4.06E-03 | -7.94E+00 | AKT interacting p RPGRIP1-like        | NM_001012398, NM_001012398,NM_022476                                    |              |
| 2.78E+02 | 8.12E+00  | meteorin, glial cc meteorin, glial cc | NM_001004431                                                            | NM_001004431 |
| 2.78E+02 | 8.12E+00  | meteorin, glial cc meteorin, glial cc | NM_001004431                                                            | NM_001004431 |
| 2.47E+02 | 7.95E+00  | glutamate-rich 1 discs, large (Dros   | NM_207332                                                               | NM_207332    |
| 1.57E+00 | 6.53E-01  | CD7 molecule secreted and tra         | NM_006137                                                               | NM_006137    |
| 1.57E+00 | 6.53E-01  | CD7 molecule secreted and tra         | NM_006137                                                               | NM_006137    |
| 1.57E+00 | 6.53E-01  | CD7 molecule secreted and tra         | NM_006137                                                               | NM_006137    |
| 4.33E-03 | -7.85E+00 | synovial sarcomæ synovial sarcomæ     | NM_003147,NM_003147,NM_175698                                           |              |
| 4.33E-03 | -7.85E+00 | synovial sarcomæ synovial sarcomæ     | NM_003147,NM_003147,NM_175698                                           |              |

|          |           |                                       |                                      |              |
|----------|-----------|---------------------------------------|--------------------------------------|--------------|
| 3.54E+02 | 8.47E+00  | G protein-couple jagged 2             | NM_013345                            | NM_013345    |
| 4.12E-03 | -7.92E+00 | chromosome 2 o chromosome 2 o         | NM_001008215                         | NM_001008215 |
| 2.47E+02 | 7.95E+00  | family with sequ family with sequ     | NR_027422                            | NR_027422    |
| 3.86E+02 | 8.59E+00  | histocompatibilit histocompatibilit   | NM_012292                            | NM_012292    |
| 2.30E+02 | 7.85E+00  | tyrosine kinase, r succinate dehydr   | NM_005781,NM_005781,NM_001010938     |              |
| 3.10E+02 | 8.27E+00  | NOP14 nucleolar NOP14 nucleolar       | NM_003703                            | NM_003703    |
| 3.10E+02 | 8.27E+00  | NOP14 nucleolar NOP14 nucleolar       | NM_003703                            | NM_003703    |
| 3.10E+02 | 8.27E+00  | NOP14 nucleolar NOP14 nucleolar       | NM_003703                            | NM_003703    |
| 4.32E+02 | 8.76E+00  | v-erb-b2 erythro v-erb-b2 erythro     | NM_004448                            | NM_004448    |
| 4.32E+02 | 8.76E+00  | v-erb-b2 erythro v-erb-b2 erythro     | NM_004448                            | NM_004448    |
| 4.32E+02 | 8.76E+00  | v-erb-b2 erythro v-erb-b2 erythro     | NM_004448                            | NM_004448    |
| 2.30E+02 | 7.85E+00  | hypothetical LOC fibrosin-like 1      | NR_024563                            | NR_024563    |
| 3.99E-03 | -7.97E+00 | tripartite motif-c tripartite motif-c | NM_014818                            | NM_014818    |
| 3.18E+02 | 8.31E+00  | mannose recept mannose recept         | NM_006039                            | NM_006039    |
| 2.45E+02 | 7.94E+00  | fatty acid syntha fatty acid syntha   | NM_004104                            | NM_004104    |
| 2.88E+02 | 8.17E+00  | SET domain cont SET domain cont       | NM_014712                            | NM_014712    |
| 2.88E+02 | 8.17E+00  | SET domain cont SET domain cont       | NM_014712                            | NM_014712    |
| 4.01E-03 | -7.96E+00 | chromosome 21 chromosome 21           | NR_026845                            | NR_026845    |
| 3.81E-03 | -8.04E+00 | apolipoprotein H protein kinase C,    | NM_000042                            | NM_000042    |
| 2.55E+02 | 8.00E+00  | nicalin homolog nicalin homolog       | NM_020170                            | NM_020170    |
| 2.55E+02 | 8.00E+00  | nicalin homolog nicalin homolog       | NM_020170                            | NM_020170    |
| 3.50E+02 | 8.45E+00  | phytanoyl-CoA d phytanoyl-CoA d       | NM_001100877                         | NM_001100877 |
| 2.10E+02 | 7.72E+00  | DEAD/H (Asp-Glu killer cell lectin-li | NM_004400                            | NM_004400    |
| 2.67E+02 | 8.06E+00  | zinc finger and B zinc finger and B   | NM_025224                            | NM_025224    |
| 2.67E+02 | 8.06E+00  | zinc finger and B zinc finger and B   | NM_025224                            | NM_025224    |
| 3.73E-03 | -8.07E+00 | diacylglycerol kin diacylglycerol kir | NM_201533                            | NM_201533    |
| 2.50E+02 | 7.97E+00  | matrix metallope matrix metallope     | NR_002946                            | NR_002946    |
| 2.59E+02 | 8.02E+00  | ankyrin repeat d lipase, member I     | NR_027270                            | NR_027270    |
| 3.19E+02 | 8.32E+00  | WD repeat domæ WD repeat domæ         | NM_052821                            | NM_052821    |
| 3.14E+02 | 8.30E+00  | glutamate-rich V potassium inwar      | NM_031485                            | NM_031485    |
| 2.18E+02 | 7.77E+00  | discs, large (Dros ceroid-lipofuscin  | NM_004745                            | NM_004745    |
| 3.04E+02 | 8.25E+00  | tweety homolog dynein, axonemæ        | NM_052869                            | NM_052869    |
| 2.62E+02 | 8.03E+00  | solute carrier fan TP53 target 3B     | NR_003083                            | NR_003083    |
| 2.50E+02 | 7.96E+00  | small nucleolar R copine VII          | NR_002450                            | NR_002450    |
| 2.50E+02 | 7.96E+00  | copine VII copine VII                 | NM_014427,NM_014427,NM_153636        |              |
| 2.64E+02 | 8.04E+00  | dihydrouridine s) neurturin           | NM_020175                            | NM_020175    |
| 2.64E+02 | 8.04E+00  | dihydrouridine s) neurturin           | NM_020175                            | NM_020175    |
| 2.44E+02 | 7.93E+00  | peptide deformy peptide deformy       | NM_022341,NM_022341,NM_032382        |              |
| 2.25E+02 | 7.81E+00  | potassium voltag potassium voltag     | NM_002237                            | NM_002237    |
| 4.10E+02 | 8.68E+00  | hypothetical LOC myocyte enhanc       | NR_024383,NR_024383,NR_024384        |              |
| 4.10E+02 | 8.68E+00  | hypothetical LOC myocyte enhanc       | NR_024383,NR_024383,NR_024384        |              |
| 4.10E+02 | 8.68E+00  | hypothetical LOC myocyte enhanc       | NR_024383,NR_024383,NR_024384        |              |
| 2.49E+02 | 7.96E+00  | collagen, type VI, collagen, type VI, | NM_001848                            | NM_001848    |
| 2.49E+02 | 7.96E+00  | collagen, type VI, collagen, type VI, | NM_001848                            | NM_001848    |
| 2.49E+02 | 7.96E+00  | collagen, type VI, collagen, type VI, | NM_001848                            | NM_001848    |
| 2.83E+02 | 8.14E+00  | H19, imprinted n insulin-like growi   | NR_002196                            | NR_002196    |
| 2.83E+02 | 8.14E+00  | H19, imprinted n insulin-like growi   | NR_002196                            | NR_002196    |
| 2.64E+02 | 8.04E+00  | amidohydrolase amidohydrolase         | NM_015944,NM_015944,NM_001145815     |              |
| 2.66E+02 | 8.05E+00  | ring finger protei ring finger protei | NM_001109903, NM_001109903,NM_032814 |              |
| 2.66E+02 | 8.05E+00  | ring finger protei ring finger protei | NM_001109903, NM_001109903,NM_032814 |              |
| 2.66E+02 | 8.05E+00  | ring finger protei ring finger protei | NM_001109903, NM_001109903,NM_032814 |              |
| 2.83E+02 | 8.14E+00  | EGF-like-domain, EGF-like-domain,     | NM_016215                            | NM_016215    |
| 2.28E+02 | 7.83E+00  | Rho GTPase activ Rho GTPase activ     | NM_020876                            | NM_020876    |
| 2.28E+02 | 7.83E+00  | Rho GTPase activ Rho GTPase activ     | NM_020876                            | NM_020876    |
| 2.70E+02 | 8.08E+00  | leucine-rich repe chondroitin sulfa   | NM_024652                            | NM_024652    |
| 2.70E+02 | 8.08E+00  | leucine-rich repe chondroitin sulfa   | NM_024652                            | NM_024652    |
| 3.29E-03 | -8.25E+00 | HtrA serine pepti deleted in maligr   | NM_002775                            | NM_002775    |
| 3.16E+02 | 8.30E+00  | mitochondrial rit mitochondrial rit   | NM_016034                            | NM_016034    |

|          |           |                                       |                                           |              |
|----------|-----------|---------------------------------------|-------------------------------------------|--------------|
| 3.63E-03 | -8.10E+00 | BTB and CNC hor mitogen-activate      | NM_021813                                 | NM_021813    |
| 2.69E+02 | 8.07E+00  | glutamic-oxaloac NK2 transcriptio     | NM_002079                                 | NM_002079    |
| 2.69E+02 | 8.07E+00  | glutamic-oxaloac NK2 transcriptio     | NM_002079                                 | NM_002079    |
| 2.50E+02 | 7.97E+00  | tau tubulin kinas                     | NM_032538                                 | NM_032538    |
| 2.50E+02 | 7.97E+00  | tau tubulin kinas                     | NM_032538                                 | NM_032538    |
| 2.32E+02 | 7.86E+00  | xylosyltransferas polycystic kidney   | NM_022166                                 | NM_022166    |
| 2.32E+02 | 7.86E+00  | xylosyltransferas polycystic kidney   | NM_022166                                 | NM_022166    |
| 2.10E+02 | 7.71E+00  | steroid-5-alpha-r PAP associated d    | NM_001047                                 | NM_001047    |
| 3.15E+02 | 8.30E+00  | active BCR-relate active BCR-relate   | NM_001159746                              | NM_001159746 |
| 3.15E+02 | 8.30E+00  | active BCR-relate active BCR-relate   | NM_001159746                              | NM_001159746 |
| 3.67E+02 | 8.52E+00  | v-akt murine thyl v-akt murine thyl   | NM_005163,NM_005163,NM_001014432,NM_      |              |
| 2.21E+02 | 7.79E+00  | tandem C2 domæ tandem C2 domæ         | NM_152332,NM_152332,NM_001128595,NM_      |              |
| 2.21E+02 | 7.79E+00  | tandem C2 domæ tandem C2 domæ         | NM_152332,NM_152332,NM_001128595,NM_      |              |
| 3.09E+02 | 8.27E+00  | calcyphosine calcyphosine             | NM_004058,NM_004058,NM_080590             |              |
| 3.09E+02 | 8.27E+00  | calcyphosine calcyphosine             | NM_004058,NM_004058,NM_080590             |              |
| 2.30E+02 | 7.84E+00  | four jointed box four jointed box     | NM_014344                                 | NM_014344    |
| 2.30E+02 | 7.84E+00  | four jointed box four jointed box     | NM_014344                                 | NM_014344    |
| 4.09E-03 | -7.93E+00 | family with sequæ integrin, alpha 2I  | NM_198475                                 | NM_198475    |
| 2.30E+02 | 7.84E+00  | tubulin, beta pse tubulin, beta pse   | NR_027156                                 | NR_027156    |
| 4.25E-03 | -7.88E+00 | bromodomain ar patatin-like phos      | NM_015695                                 | NM_015695    |
| 2.60E+02 | 8.02E+00  | guanine nucleoti guanine nucleoti     | NM_002067                                 | NM_002067    |
| 2.60E+02 | 8.02E+00  | guanine nucleoti guanine nucleoti     | NM_002067                                 | NM_002067    |
| 2.70E+02 | 8.08E+00  | sialidase 4 sialidase 4               | NM_080741                                 | NM_080741    |
| 2.70E+02 | 8.08E+00  | sialidase 4 sialidase 4               | NM_080741                                 | NM_080741    |
| 2.76E+02 | 8.11E+00  | tubulin tyrosine I tubulin tyrosine I | NM_001130045                              | NM_001130045 |
| 2.76E+02 | 8.11E+00  | tubulin tyrosine I tubulin tyrosine I | NM_001130045                              | NM_001130045 |
| 2.64E+02 | 8.04E+00  | transmembrane M-phase phosph          | NM_130785,NM_130785,NM_199254,NM_001      |              |
| 3.44E+02 | 8.43E+00  | UNC homeobox MICAL-like 2             | NM_001080461                              | NM_001080461 |
| 3.44E+02 | 8.43E+00  | UNC homeobox MICAL-like 2             | NM_001080461                              | NM_001080461 |
| 2.76E+02 | 8.11E+00  | BTB (POZ) domai transmembrane         | NM_001011885, NM_001011885,NM_025238      |              |
| 2.76E+02 | 8.11E+00  | BTB (POZ) domai transmembrane         | NM_001011885, NM_001011885,NM_025238      |              |
| 2.53E+02 | 7.98E+00  | ankyrin repeat d G protein-couple     | NR_027019, NR_027019, NR_027020           |              |
| 2.53E+02 | 7.98E+00  | ankyrin repeat d G protein-couple     | NR_027019, NR_027019, NR_027020           |              |
| 2.66E+02 | 8.05E+00  | v-akt murine thyl zinc finger protei  | NM_005465                                 | NM_005465    |
| 3.19E+02 | 8.32E+00  | sodium channel, sodium channel,       | NM_000334                                 | NM_000334    |
| 3.13E-03 | -8.32E+00 | chromosome 18 chromosome 18           | NM_001037331                              | NM_001037331 |
| 3.72E+02 | 8.54E+00  | tumor necrosis fæ chromosome 1 o      | NM_003820                                 | NM_003820    |
| 3.72E+02 | 8.54E+00  | tumor necrosis fæ chromosome 1 o      | NM_003820                                 | NM_003820    |
| 4.42E-03 | -7.82E+00 | chromosome 6 o chromosome 6 o         | NM_206921                                 | NM_206921    |
| 4.42E-03 | -7.82E+00 | chromosome 6 o chromosome 6 o         | NM_206921                                 | NM_206921    |
| 2.36E+02 | 7.88E+00  | hyperpolarizatio hyperpolarizatio     | NM_001194                                 | NM_001194    |
| 2.10E+02 | 7.72E+00  | dipeptidase 3 dipeptidase 3           | NM_022357,NM_022357,NM_001129758          |              |
| 2.53E+02 | 7.98E+00  | LAG1 homolog, c LAG1 homolog, c       | NM_021267,NM_021267,NM_001492             |              |
| 2.53E+02 | 7.98E+00  | LAG1 homolog, c LAG1 homolog, c       | NM_021267,NM_021267,NM_001492             |              |
| 2.98E+02 | 8.22E+00  | gem (nuclear org NTPase, KAP fam      | NM_024707,NM_024707,NM_001007269          |              |
| 2.98E+02 | 8.22E+00  | gem (nuclear org NTPase, KAP fam      | NM_024707,NM_024707,NM_001007269          |              |
| 2.98E+02 | 8.22E+00  | gem (nuclear org NTPase, KAP fam      | NM_024707,NM_024707,NM_001007269          |              |
| 2.62E+02 | 8.03E+00  | chromosome 22 bromodomain cc          | NR_026997                                 | NR_026997    |
| 2.62E+02 | 8.03E+00  | chromosome 22 bromodomain cc          | NR_026997                                 | NR_026997    |
| 2.79E+02 | 8.12E+00  | notch 1 EGF-like-domain, NM_017617    | NM_017617                                 | NM_017617    |
| 4.08E-03 | -7.94E+00 | prominin 1 prominin 1                 | NM_001145848, NM_001145848,NM_001145847,N |              |
| 4.08E-03 | -7.94E+00 | prominin 1 prominin 1                 | NM_001145848, NM_001145848,NM_001145847,N |              |
| 2.61E+02 | 8.03E+00  | GNAS complex lc GNAS complex lc       | NM_016592                                 | NM_016592    |
| 2.70E+02 | 8.08E+00  | trinucleotide rep trinucleotide rep   | NM_001080495                              | NM_001080495 |
| 3.30E+02 | 8.37E+00  | zinc finger protei zinc finger protei | NM_153034                                 | NM_153034    |
| 4.13E+02 | 8.69E+00  | lamin B2 lamin B2                     | NM_032737                                 | NM_032737    |
| 2.16E+02 | 7.76E+00  | LIM domains cor LIM domains cor       | NM_014240                                 | NM_014240    |
| 4.19E-03 | -7.90E+00 | zinc finger protei FYVE, RhoGEF an    | NM_001007101                              | NM_001007101 |



|          |           |                         |                                                                   |
|----------|-----------|-------------------------|-------------------------------------------------------------------|
| 4.19E+02 | 8.71E+00  | protein tyrosine kinase | NM_130842,NM_130842,NM_130843,NM_002                              |
| 2.60E+02 | 8.02E+00  | NK6 homeobox 2          | chromosome 10 NM_177400 NM_177400                                 |
| 3.06E+02 | 8.26E+00  | glutamic-pyruvate       | glutamic-pyruvate NM_005309 NM_005309                             |
| 4.96E-03 | -7.66E+00 | F-box and leucine       | wingless-type MI NM_152441 NM_152441                              |
| 2.43E+02 | 7.92E+00  | ryanodine receptor      | ryanodine receptor NM_000540,NM_000540,NM_001042723               |
| 2.43E+02 | 7.92E+00  | ryanodine receptor      | ryanodine receptor NM_000540,NM_000540,NM_001042723               |
| 2.41E+02 | 7.91E+00  | retinoic acid early     | UL16 binding protein NM_130900 NM_130900                          |
| 2.24E+02 | 7.81E+00  | G protein-coupled       | SFT2 domain core NM_005291 NM_005291                              |
| 4.85E-03 | -7.69E+00 | docking protein 2       | docking protein 2 NM_003974 NM_003974                             |
| 3.38E+02 | 8.40E+00  | wingless-type MI        | wingless-type MI NM_030775 NM_030775                              |
| 3.38E+02 | 8.40E+00  | wingless-type MI        | wingless-type MI NM_030775 NM_030775                              |
| 2.98E+02 | 8.22E+00  | synovial sarcoma        | synovial sarcoma NM_198935 NM_198935                              |
| 2.98E+02 | 8.22E+00  | synovial sarcoma        | synovial sarcoma NM_198935 NM_198935                              |
| 2.77E+02 | 8.11E+00  | reticulocalbin 2,       | proline-serine-threonine NM_002902 NM_002902                      |
| 2.71E+02 | 8.08E+00  | ring finger protein     | ring finger protein NM_194460 NM_194460                           |
| 2.18E+02 | 7.77E+00  | sequestosome 1          | sequestosome 1 NM_001142299 NM_001142299                          |
| 2.18E+02 | 7.77E+00  | sequestosome 1          | sequestosome 1 NM_001142299 NM_001142299                          |
| 2.94E+02 | 8.20E+00  | solute carrier fan      | solute carrier fan NM_152346 NM_152346                            |
| 2.38E+02 | 7.90E+00  | sialidase 4             | programmed cell death NM_080741 NM_080741                         |
| 3.37E-03 | -8.21E+00 | RAB6B, member           | chromosome 3 ortholog NM_016577 NM_016577                         |
| 3.74E+02 | 8.55E+00  | signal-regulatory       | signal-regulatory protein NM_001040023 NM_001040023               |
| 3.97E-03 | -7.98E+00 | aquaporin 9             | lipase, hepatic NM_020980 NM_020980                               |
| 3.97E-03 | -7.98E+00 | lipase, hepatic         | lipase, hepatic NM_000236 NM_000236                               |
| 2.29E+02 | 7.84E+00  | cadherin 15, type       | cadherin 15, type I NM_004933 NM_004933                           |
| 2.78E+02 | 8.12E+00  | cathepsin D             | synaptotagmin V NM_001909 NM_001909                               |
| 3.61E-03 | -8.11E+00 | inter-alpha (glob       | inter-alpha (globulin) NM_001001851 NM_001001851                  |
| 3.61E-03 | -8.11E+00 | inter-alpha (glob       | inter-alpha (globulin) NM_001001851 NM_001001851                  |
| 4.24E-03 | -7.88E+00 | BCL2-like 14 (apc       | BCL2-like 14 (apc) NM_138723 NM_138723                            |
| 4.24E-03 | -7.88E+00 | BCL2-like 14 (apc       | BCL2-like 14 (apc) NM_138722,NM_138722,NM_030766                  |
| 1.98E+02 | 7.63E+00  | RAB10, member           | hydroxyacyl-CoA transferase NM_016131 NM_016131                   |
| 2.62E+02 | 8.03E+00  | transmembrane           | transmembrane protein NM_001008269 NM_001008269                   |
| 2.97E+02 | 8.22E+00  | lymphocyte antigen      | glycosylphosphatidylinositol NM_001135655, NM_001135655,NM_002347 |
| 4.12E-03 | -7.92E+00 | colony stimulating      | interleukin 3 receptor NM_172247 NM_172247                        |
| 2.13E+02 | 7.74E+00  | zinc finger protein     | zinc finger protein NM_152600 NM_152600                           |
| 2.13E+02 | 7.74E+00  | zinc finger protein     | zinc finger protein NM_152600 NM_152600                           |
| 2.61E+02 | 8.03E+00  | beta-1,4-N-acetyl       | beta-1,4-N-acetyltransferase NM_178537 NM_178537                  |
| 2.61E+02 | 8.03E+00  | beta-1,4-N-acetyl       | beta-1,4-N-acetyltransferase NM_178537 NM_178537                  |
| 2.61E+02 | 8.03E+00  | beta-1,4-N-acetyl       | beta-1,4-N-acetyltransferase NM_178537 NM_178537                  |
| 2.61E+02 | 8.03E+00  | calcium channel,        | calcium channel, voltage-gated NM_021098,NM_021098,NM_001005407   |
| 3.10E+02 | 8.27E+00  | KIAA1875                | KIAA1875 NR_024207 NR_024207                                      |
| 2.25E+02 | 7.81E+00  | retinoic acid receptor  | retinoic acid receptor NM_002888 NM_002888                        |
| 2.25E+02 | 7.81E+00  | retinoic acid receptor  | major facilitator protein NM_002888 NM_002888                     |
| 3.05E+02 | 8.25E+00  | nuclear factor I/c      | nuclear factor I/c-like 1 NM_005597 NM_005597                     |
| 3.05E+02 | 8.25E+00  | nuclear factor I/c      | nuclear factor I/c-like 1 NM_005597 NM_005597                     |
| 3.02E+02 | 8.24E+00  | chorionic gonadotropin  | chorionic gonadotropin NM_033378 NM_033378                        |
| 3.57E+02 | 8.48E+00  | sidekick homolog        | sidekick homolog NM_001079653 NM_001079653                        |
| 3.02E+02 | 8.24E+00  | chromosome 21           | heat shock transcription factor NR_026863 NR_026863               |
| 3.02E+02 | 8.24E+00  | chromosome 21           | heat shock transcription factor NR_026863 NR_026863               |
| 2.27E+02 | 7.82E+00  | cadherin 20, type       | cadherin 20, type I NM_031891 NM_031891                           |
| 2.96E+02 | 8.21E+00  | programmed cell         | chromosome 2 ortholog NM_005018 NM_005018                         |
| 3.71E-03 | -8.07E+00 | synovial sarcoma        | lysophosphatidic acid NM_014021 NM_014021                         |
| 3.71E-03 | -8.07E+00 | synovial sarcoma        | lysophosphatidic acid NM_014021 NM_014021                         |
| 3.18E+02 | 8.31E+00  | sialic acid binding     | sialic acid binding protein NM_001098612 NM_001098612             |
| 3.18E+02 | 8.31E+00  | sialic acid binding     | sialic acid binding protein NM_001098612 NM_001098612             |
| 2.80E+02 | 8.13E+00  | retinoic acid inducible | retinoic acid inducible protein NM_001145520 NM_001145520         |
| 2.80E+02 | 8.13E+00  | retinoic acid inducible | retinoic acid inducible protein NM_001145520 NM_001145520         |
| 4.27E-03 | -7.87E+00 | zinc finger, DHH        | zinc finger, DHH domain NM_022494 NM_022494                       |
| 4.27E-03 | -7.87E+00 | zinc finger, DHH        | zinc finger, DHH domain NM_022494 NM_022494                       |

|          |           |                                         |                                         |              |
|----------|-----------|-----------------------------------------|-----------------------------------------|--------------|
| 4.18E-03 | -7.90E+00 | zinc finger protei family with sequ     | NM_001001662                            | NM_001001662 |
| 4.18E-03 | -7.90E+00 | zinc finger protei family with sequ     | NM_001001662                            | NM_001001662 |
| 4.18E-03 | -7.90E+00 | zinc finger protei family with sequ     | NM_001001662                            | NM_001001662 |
| 2.39E+02 | 7.90E+00  | chymotrypsin-lik UDP-N-acetyl-alç       | NM_001971                               | NM_001971    |
| 2.36E+02 | 7.88E+00  | UNC homeobox MICAL-like 2               | NM_001080461                            | NM_001080461 |
| 2.87E+02 | 8.16E+00  | secretin secretin                       | NM_021920                               | NM_021920    |
| 2.87E+02 | 8.16E+00  | secretin dopamine recept                | NM_021920                               | NM_021920    |
| 2.88E+02 | 8.17E+00  | cadherin-related cadherin-related       | NM_021924,NM_021924,NM_031264           |              |
| 2.88E+02 | 8.17E+00  | cadherin-related cadherin-related       | NM_021924,NM_021924,NM_031264           |              |
| 2.88E+02 | 8.17E+00  | cadherin-related cadherin-related       | NM_021924,NM_021924,NM_031264           |              |
| 3.33E+02 | 8.38E+00  | strawberry notçf strawberry notçf       | NM_001100122, NM_001100122,NM_014963    |              |
| 3.76E+02 | 8.56E+00  | zinc finger protei zinc finger protei   | NR_003253,NM_NR_003253,NM_003426        |              |
| 3.76E+02 | 8.56E+00  | zinc finger protei zinc finger protei   | NR_003253,NM_NR_003253,NM_003426        |              |
| 3.76E+02 | 8.56E+00  | zinc finger protei zinc finger protei   | NR_003253,NM_NR_003253,NM_003426        |              |
| 2.21E+02 | 7.79E+00  | lysine (K)-specific lysine (K)-specific | NM_015015                               | NM_015015    |
| 2.21E+02 | 7.79E+00  | lysine (K)-specific lysine (K)-specific | NM_015015                               | NM_015015    |
| 2.66E+02 | 8.06E+00  | GNAS complex lc GNAS complex lc         | NM_001077490, NM_001077490,NM_080425    |              |
| 2.66E+02 | 8.06E+00  | GNAS complex lc GNAS complex lc         | NM_001077490, NM_001077490,NM_080425    |              |
| 2.66E+02 | 8.06E+00  | GNAS complex lc GNAS complex lc         | NM_001077490, NM_001077490,NM_080425    |              |
| 4.47E+02 | 8.80E+00  | cholinergic recep potassium voltag      | NM_000744                               | NM_000744    |
| 4.47E+02 | 8.80E+00  | cholinergic recep potassium voltag      | NM_000744                               | NM_000744    |
| 4.47E+02 | 8.80E+00  | cholinergic recep potassium voltag      | NM_000744                               | NM_000744    |
| 2.10E+02 | 7.72E+00  | chromodomain f chromodomain f           | NM_015557                               | NM_015557    |
| 3.94E-03 | -7.99E+00 | CD22 molecule free fatty acid re        | NM_001771                               | NM_001771    |
| 2.34E+02 | 7.87E+00  | 5-hydroxytryptar 5-hydroxytryptar       | NM_001040174                            | NM_001040174 |
| 2.27E+02 | 7.82E+00  | TBC1 domain fan TBC1 domain fan         | NM_019020                               | NM_019020    |
| 2.27E+02 | 7.82E+00  | TBC1 domain fan TBC1 domain fan         | NM_019020                               | NM_019020    |
| 3.67E-03 | -8.09E+00 | zinc finger protei squalene epoxid:     | NM_152412                               | NM_152412    |
| 3.67E-03 | -8.09E+00 | zinc finger protei squalene epoxid:     | NM_152412                               | NM_152412    |
| 2.29E+02 | 7.84E+00  | methyltransferas methyltransferas       | NM_024086                               | NM_024086    |
| 2.29E+02 | 7.84E+00  | methyltransferas methyltransferas       | NM_024086                               | NM_024086    |
| 2.70E+02 | 8.08E+00  | GLI family zinc fir zinc finger protei  | NM_138465                               | NM_138465    |
| 2.70E+02 | 8.08E+00  | GLI family zinc fir zinc finger protei  | NM_138465                               | NM_138465    |
| 3.14E+02 | 8.30E+00  | amylase, alpha 1 amylase, alpha 1       | NM_001008218, NM_001008218,NM_001008219 |              |
| 4.05E-03 | -7.95E+00 | transcription fact transcription fact   | NM_005650,NM_005650,NM_181492           |              |
| 4.05E-03 | -7.95E+00 | transcription fact transcription fact   | NM_005650,NM_005650,NM_181492           |              |
| 2.35E+02 | 7.88E+00  | ELAV (embryonic ELAV (embryonic         | NM_032281,NM_032281,NM_001420           |              |
| 2.35E+02 | 7.88E+00  | ELAV (embryonic zinc finger protei      | NM_032281,NM_032281,NM_001420           |              |
| 2.31E+02 | 7.85E+00  | KIAA0649 KIAA0649                       | NM_014811                               | NM_014811    |
| 4.11E-03 | -7.93E+00 | Ras association ( CD28 molecule         | NM_203365                               | NM_203365    |
| 2.64E+02 | 8.04E+00  | kelch domain cor transmembrane          | NM_014997                               | NM_014997    |
| 3.12E+02 | 8.29E+00  | gametogenetin gametogenetin             | NM_152657                               | NM_152657    |
| 3.12E+02 | 8.29E+00  | gametogenetin gametogenetin             | NM_152657                               | NM_152657    |
| 3.29E+02 | 8.36E+00  | tenascin XB tenascin XB                 | NM_019105,NM_019105,NM_032470           |              |
| 2.29E+02 | 7.84E+00  | cortexin 1 cortexin 1                   | NM_206833                               | NM_206833    |
| 2.30E+02 | 7.85E+00  | zinc finger protei zinc finger protei   | NM_001080409                            | NM_001080409 |
| 2.23E+02 | 7.80E+00  | 5-methyltetrahç ryanodine recept        | NM_000254                               | NM_000254    |
| 3.25E-03 | -8.27E+00 | Charcot-Leyden ç leucine twenty h       | NM_001828                               | NM_001828    |
| 2.69E+02 | 8.07E+00  | chromosome 4 o protocadherin 1f         | NM_001099783                            | NM_001099783 |
| 2.69E+02 | 8.07E+00  | chromosome 4 o protocadherin 1f         | NM_001099783                            | NM_001099783 |
| 4.48E-03 | -7.80E+00 | proteasome (pro phosphatidylinos        | NM_174871                               | NM_174871    |
| 4.48E-03 | -7.80E+00 | proteasome (pro phosphatidylinos        | NM_174871                               | NM_174871    |
| 2.69E+02 | 8.07E+00  | transmembrane KIAA0125                  | NM_025268                               | NM_025268    |
| 2.48E+02 | 7.95E+00  | chromosome 21 chromosome 21             | NM_032261,NM_032261,NM_001142854        |              |
| 2.48E+02 | 7.95E+00  | chromosome 21 chromosome 21             | NM_032261,NM_032261,NM_001142854        |              |
| 2.98E+02 | 8.22E+00  | GTP binding prot GTP binding prot       | NM_012227                               | NM_012227    |
| 2.98E+02 | 8.22E+00  | GTP binding prot GTP binding prot       | NM_012227                               | NM_012227    |
| 2.56E+02 | 8.00E+00  | CXXC finger 5 pleckstrin and Se         | NM_016463                               | NM_016463    |

|          |           |                                        |                                           |              |
|----------|-----------|----------------------------------------|-------------------------------------------|--------------|
| 2.23E+02 | 7.80E+00  | phospholamban ASF1 anti-silenci        | NM_002667                                 | NM_002667    |
| 3.33E+02 | 8.38E+00  | fibrillin 2 fibrillin 2                | NM_001999                                 | NM_001999    |
| 3.33E+02 | 8.38E+00  | fibrillin 2 fibrillin 2                | NM_001999                                 | NM_001999    |
| 2.94E+02 | 8.20E+00  | spleen tyrosine k AU RNA binding       | NR_024155                                 | NR_024155    |
| 2.94E+02 | 8.20E+00  | spleen tyrosine k AU RNA binding       | NR_024155                                 | NR_024155    |
| 2.94E+02 | 8.20E+00  | spleen tyrosine k AU RNA binding       | NR_024155                                 | NR_024155    |
| 2.59E+02 | 8.02E+00  | lectin, galactosid lectin, galactosid  | NM_001042507                              | NM_001042507 |
| 2.21E+02 | 7.79E+00  | inscuteable hom SRY (sex determi       | NM_001042536                              | NM_001042536 |
| 2.06E+02 | 7.68E+00  | zinc finger protei zinc finger protei  | NR_026569,NM_ NR_026569,NM_001143823,NM_( |              |
| 2.15E+02 | 7.75E+00  | uridine-cytidine † Rap guanine nucl    | NM_031432,NM_ NM_031432,NM_001135954      |              |
| 2.15E+02 | 7.75E+00  | uridine-cytidine † Rap guanine nucl    | NM_031432,NM_ NM_031432,NM_001135954      |              |
| 2.82E+02 | 8.14E+00  | orthodenticle ho exocyst complex       | NM_172337,NM_ NM_172337,NM_021728         |              |
| 2.43E+02 | 7.92E+00  | coiled-coil doma hypothetical pro      | NM_152492                                 | NM_152492    |
| 2.43E+02 | 7.92E+00  | coiled-coil doma hypothetical pro      | NM_152492                                 | NM_152492    |
| 2.58E+02 | 8.01E+00  | nuclear factor I/‡ nuclear factor I/‡  | NM_005597                                 | NM_005597    |
| 3.18E+02 | 8.31E+00  | mucin 6, oligome mucin 6, oligome      | NM_005961                                 | NM_005961    |
| 3.18E+02 | 8.31E+00  | mucin 6, oligome mucin 6, oligome      | NM_005961                                 | NM_005961    |
| 3.18E+02 | 8.31E+00  | mucin 6, oligome mucin 6, oligome      | NM_005961                                 | NM_005961    |
| 3.12E+02 | 8.29E+00  | REX1, RNA exon REX1, RNA exon          | NM_020695                                 | NM_020695    |
| 3.12E+02 | 8.29E+00  | REX1, RNA exon REX1, RNA exon          | NM_020695                                 | NM_020695    |
| 3.80E-03 | -8.04E+00 | small nucleolar R receptor (G prot     | NR_002990                                 | NR_002990    |
| 4.47E-03 | -7.81E+00 | olfactory receptc olfactory receptc    | NM_013937                                 | NM_013937    |
| 4.47E-03 | -7.81E+00 | olfactory receptc olfactory receptc    | NM_013937                                 | NM_013937    |
| 2.50E+02 | 7.97E+00  | coiled-coil doma coiled-coil doma      | NM_032251                                 | NM_032251    |
| 2.50E+02 | 7.97E+00  | coiled-coil doma coiled-coil doma      | NM_032251                                 | NM_032251    |
| 5.09E-03 | -7.62E+00 | MAD2L1 binding MAD2L1 binding          | NM_001003690                              | NM_001003690 |
| 2.30E+02 | 7.84E+00  | KIAA1012 ring finger protei            | NM_014939                                 | NM_014939    |
| 3.79E+02 | 8.57E+00  | homeodomain ir homeodomain ir          | NM_144685                                 | NM_144685    |
| 3.79E+02 | 8.57E+00  | homeodomain ir homeodomain ir          | NM_144685                                 | NM_144685    |
| 3.79E+02 | 8.57E+00  | homeodomain ir homeodomain ir          | NM_144685                                 | NM_144685    |
| 3.34E+02 | 8.38E+00  | neuromedin U exocyst complex           | NM_006681                                 | NM_006681    |
| 3.34E+02 | 8.38E+00  | neuromedin U exocyst complex           | NM_006681                                 | NM_006681    |
| 4.21E-03 | -7.89E+00 | neurobeachin-lik neurotrophin rec      | NM_015175                                 | NM_015175    |
| 2.96E+02 | 8.21E+00  | chromobox hom chromobox hom            | NM_003655                                 | NM_003655    |
| 2.48E+02 | 7.95E+00  | DEAH (Asp-Glu-A fibronectin type       | NM_018180                                 | NM_018180    |
| 2.54E+02 | 7.99E+00  | LIM domain cont tumor protein p‡       | NM_005578                                 | NM_005578    |
| 3.44E-03 | -8.18E+00 | thyroid hormone zinc finger protei     | NM_016213                                 | NM_016213    |
| 3.44E-03 | -8.18E+00 | zinc finger protei zinc finger protei  | NM_015042                                 | NM_015042    |
| 3.44E-03 | -8.18E+00 | solute carrier fan family with sequ    | NM_012450                                 | NM_012450    |
| 3.44E-03 | -8.18E+00 | solute carrier fan family with sequ    | NM_012450                                 | NM_012450    |
| 4.92E-03 | -7.67E+00 | lymphocyte anti‡ chromosome 8 o        | NM_001127213, NM_001127213,NM_002346      |              |
| 2.23E+02 | 7.80E+00  | protein tyrosine protein tyrosine      | NM_003660                                 | NM_003660    |
| 3.70E-03 | -8.08E+00 | annexin A8-like 1 family with sequ     | NM_001098845                              | NM_001098845 |
| 2.84E+02 | 8.15E+00  | family with sequ family with sequ      | NM_138418                                 | NM_138418    |
| 2.84E+02 | 8.15E+00  | family with sequ family with sequ      | NM_138418                                 | NM_138418    |
| 2.84E+02 | 8.15E+00  | family with sequ family with sequ      | NM_138418                                 | NM_138418    |
| 3.05E+02 | 8.25E+00  | protein phosphai protein phosphai      | NM_001142502, NM_001142502,NM_006663      |              |
| 3.05E+02 | 8.25E+00  | protein phosphai protein phosphai      | NM_001142502, NM_001142502,NM_006663      |              |
| 4.88E-03 | -7.28E+00 | NSA2 ribosome ‡ NSA2 ribosome ‡        | NM_014886                                 | NM_014886    |
| 4.35E-03 | -7.84E+00 | cell division cycle cathelicidin antir | NM_201567,NM_ NM_201567,NM_001789         |              |
| 4.35E-03 | -7.84E+00 | cell division cycle cathelicidin antir | NM_201567,NM_ NM_201567,NM_001789         |              |
| 4.33E-03 | -7.85E+00 | follistatin-like 1 NADH dehydroge      | NM_007085                                 | NM_007085    |
| 2.51E+02 | 7.97E+00  | cleavage and pol isoamyl acetate-‡     | NM_016207                                 | NM_016207    |
| 2.63E+02 | 8.04E+00  | transformer 2 al‡ CDC-like kinase 2    | NM_013293                                 | NM_013293    |
| 2.63E+02 | 8.04E+00  | transformer 2 al‡ CDC-like kinase 2    | NM_013293                                 | NM_013293    |
| 3.60E-03 | -8.12E+00 | GSG1-like exportin 6                   | NM_144675,NM_ NM_144675,NM_001109763      |              |
| 2.64E+02 | 8.04E+00  | nuclear factor I/‡ TM2 domain con      | NM_005595,NM_ NM_005595,NM_001134673      |              |
| 2.64E+02 | 8.04E+00  | nuclear factor I/‡ TM2 domain con      | NM_005595,NM_ NM_005595,NM_001134673      |              |

|          |           |                                                   |                                         |                               |
|----------|-----------|---------------------------------------------------|-----------------------------------------|-------------------------------|
| 2.29E+02 | 7.84E+00  | chromosome 19 coactivator-associated              | NM_001136482                            | NM_001136482                  |
| 2.99E+02 | 8.22E+00  | zinc finger, FYVE zinc finger, FYVE               | NM_020972                               | NM_020972                     |
| 2.99E+02 | 8.22E+00  | zinc finger, FYVE zinc finger, FYVE               | NM_020972                               | NM_020972                     |
| 2.12E+02 | 7.73E+00  | neurexin 2 RAS guanyl release factor              | NM_138734,NM_138734,NM_015080,NM_138734 | NM_138734,NM_015080,NM_138734 |
| 2.23E+02 | 7.80E+00  | sema domain, irrt sema domain, irrt               | NM_017789                               | NM_017789                     |
| 2.23E+02 | 7.80E+00  | sema domain, irrt sema domain, irrt               | NM_017789                               | NM_017789                     |
| 3.23E+02 | 8.33E+00  | jumonji domain (WD repeat domain)                 | NM_001005920                            | NM_001005920                  |
| 2.56E+02 | 8.00E+00  | calcium channel, coiled-coil domain               | NM_005183                               | NM_005183                     |
| 2.80E-03 | -8.48E+00 | asteroid homolog, asteroid homolog                | NM_014065                               | NM_014065                     |
| 2.80E-03 | -8.48E+00 | asteroid homolog, asteroid homolog                | NM_014065                               | NM_014065                     |
| 3.94E-03 | -7.99E+00 | mitochondrial ribosomal protein                   | NM_015084                               | NM_015084                     |
| 3.94E-03 | -7.99E+00 | mitochondrial ribosomal protein                   | NM_015084                               | NM_015084                     |
| 3.94E-03 | -7.99E+00 | mitochondrial ribosomal protein                   | NM_015084                               | NM_015084                     |
| 2.43E+02 | 7.92E+00  | golgin A8 family, null                            |                                         | null                          |
| 2.51E+02 | 7.97E+00  | zinc finger protein zinc finger protein           | NM_213605                               | NM_213605                     |
| 2.89E+02 | 8.17E+00  | golgi to ER traffic golgi to ER traffic           | NM_015949                               | NM_015949                     |
| 4.55E-03 | -7.78E+00 | phosphatidylethanolamine phosphatidylethanolamine | NM_148173,NM_148173,NM_007169,NM_148173 | NM_148173,NM_007169,NM_148173 |
| 4.55E-03 | -7.78E+00 | phosphatidylethanolamine phosphatidylethanolamine | NM_148173,NM_148173,NM_007169,NM_148173 | NM_148173,NM_007169,NM_148173 |
| 2.35E+02 | 7.88E+00  | BR serine/threonine phosphatase                   | NM_003957                               | NM_003957                     |
| 2.15E+02 | 7.75E+00  | potassium voltage-gated channel                   | NM_181798                               | NM_181798                     |
| 2.45E+02 | 7.94E+00  | basigin (Ok blood group antigen)                  | NM_001728,NM_198589                     | NM_001728,NM_198589           |
| 2.45E+02 | 7.94E+00  | basigin (Ok blood group antigen)                  | NM_001728,NM_198589                     | NM_001728,NM_198589           |
| 4.42E-03 | -7.82E+00 | Jun dimerization basic leucine zipper             | NM_001135049                            | NM_001135049                  |
| 2.34E+02 | 7.87E+00  | IWS1 homolog (5 myosin VII B)                     | NM_017969                               | NM_017969                     |
| 2.34E+02 | 7.87E+00  | myosin VII B myosin VII B                         | NM_001080527                            | NM_001080527                  |
| 3.34E+02 | 8.38E+00  | furin (paired basic amino acid protease)          | NM_002569                               | NM_002569                     |
| 4.00E+02 | 8.64E+00  | guanidinoacetate methyltransferase                | NM_000156                               | NM_000156                     |
| 3.18E+02 | 8.31E+00  | F-box protein 24 F-box protein 24                 | NM_033506,NM_012172                     | NM_033506,NM_012172           |
| 3.18E+02 | 8.31E+00  | F-box protein 24 F-box protein 24                 | NM_033506,NM_012172                     | NM_033506,NM_012172           |
| 2.26E+02 | 7.82E+00  | DEAH (Asp-Glu-A fibronectin type III domain)      | NM_018180                               | NM_018180                     |
| 2.23E+02 | 7.80E+00  | arginine-fifty homology domain, rhomboid, vein1   | NR_002222                               | NR_002222                     |
| 4.08E-03 | -7.94E+00 | ArfGAP with GTPase-activating protein family      | NM_001077665                            | NM_001077665                  |
| 2.80E+02 | 8.13E+00  | chromosome 3 von Hippel-Lindau disease            | NM_018462                               | NM_018462                     |
| 4.54E+02 | 8.83E+00  | tetraspanin 4 tetraspanin 4                       | NM_001025237                            | NM_001025237                  |
| 4.52E-03 | -7.79E+00 | zinc finger protein hyaluronan binding            | NM_153695                               | NM_153695                     |
| 2.89E+02 | 8.17E+00  | chromosome 22 chromosome 22                       | NM_001009880,NM_001009880,NM_015264     | NM_001009880,NM_015264        |
| 2.47E+02 | 7.95E+00  | cancer/testis antigen cancer/testis antigen       | NM_001102658                            | NM_001102658                  |
| 2.47E+02 | 7.95E+00  | cancer/testis antigen thrombospondin              | NM_001102658                            | NM_001102658                  |
| 2.11E+02 | 7.72E+00  | chromosome 8 chromosome 8                         | NM_001001795                            | NM_001001795                  |
| 3.87E+02 | 8.59E+00  | collagen, type IV, collagen, type IV              | NM_001846                               | NM_001846                     |
| 3.87E+02 | 8.59E+00  | collagen, type IV, collagen, type IV              | NM_001846                               | NM_001846                     |
| 2.71E+02 | 8.08E+00  | fibroblast growth factor fibroblast growth factor | NM_003867                               | NM_003867                     |
| 2.71E+02 | 8.08E+00  | fibroblast growth factor fibroblast growth factor | NM_003867                               | NM_003867                     |
| 2.88E+02 | 8.17E+00  | agrin agrin                                       | NM_198576                               | NM_198576                     |
| 4.35E-03 | -7.84E+00 | latrophilin 1 CD97 molecule                       | NM_014921,NM_001008701                  | NM_014921,NM_001008701        |
| 4.35E-03 | -7.84E+00 | latrophilin 1 CD97 molecule                       | NM_014921,NM_001008701                  | NM_014921,NM_001008701        |
| 2.73E+02 | 8.09E+00  | KIAA1486 KIAA1486                                 | NM_020864                               | NM_020864                     |
| 2.73E+02 | 8.09E+00  | KIAA1486 KIAA1486                                 | NM_020864                               | NM_020864                     |
| 2.68E+02 | 8.06E+00  | amiloride-sensitive amiloride-sensitive           | NM_020039,NM_001095                     | NM_020039,NM_001095           |
| 2.68E+02 | 8.06E+00  | amiloride-sensitive amiloride-sensitive           | NM_020039,NM_001095                     | NM_020039,NM_001095           |
| 2.69E+02 | 8.07E+00  | nuclear factor I nuclear factor I                 | NM_002501                               | NM_002501                     |
| 2.69E+02 | 8.07E+00  | nuclear factor I nuclear factor I                 | NM_002501                               | NM_002501                     |
| 4.57E-03 | -7.77E+00 | tumor protein p53 hypothetical LOC                | NM_001076787,NM_006034                  | NM_001076787,NM_006034        |
| 2.15E+02 | 7.75E+00  | killer cell lectin-like C-type lectin domain      | NM_198508                               | NM_198508                     |
| 4.92E-03 | -7.67E+00 | Rap guanine nucleotide exchange factor            | NM_007023                               | NM_007023                     |
| 3.59E-03 | -8.12E+00 | chromosome 7 cullin 1                             | NM_145304                               | NM_145304                     |
| 3.59E-03 | -8.12E+00 | chromosome 7 cullin 1                             | NM_145304                               | NM_145304                     |
| 3.59E-03 | -8.12E+00 | chromosome 7 cullin 1                             | NM_145304                               | NM_145304                     |

|          |           |                     |                     |               |                            |
|----------|-----------|---------------------|---------------------|---------------|----------------------------|
| 4.53E+02 | 8.82E+00  | solute carrier fan  | solute carrier fan  | NM_001636     | NM_001636                  |
| 4.66E-03 | -7.75E+00 | CWC25 spliceosc     | CWC25 spliceosc     | NM_017748     | NM_017748                  |
| 2.36E+02 | 7.88E+00  | azurocidin 1        | proteinase 3        | NM_001700     | NM_001700                  |
| 3.29E+02 | 8.36E+00  | inverted formin,    | adenylosuccinate    | NM_032714     | NM_032714                  |
| 3.29E+02 | 8.36E+00  | inverted formin,    | adenylosuccinate    | NM_032714     | NM_032714                  |
| 3.29E+02 | 8.36E+00  | inverted formin,    | adenylosuccinate    | NM_032714     | NM_032714                  |
| 4.66E-03 | -7.75E+00 | transmembrane       | transmembrane       | NM_213601     | NM_213601                  |
| 2.26E+02 | 7.82E+00  | JAZF zinc finger 1  | JAZF zinc finger 1  | NM_175061     | NM_175061                  |
| 2.35E+02 | 7.88E+00  | similar to hCG17    | similar to hCG17    | NR_024014     | NR_024014                  |
| 2.35E+02 | 7.88E+00  | similar to hCG17    | similar to hCG17    | NR_024014     | NR_024014                  |
| 3.80E-03 | -8.04E+00 | resistance to inhi  | chromosome 12       | NM_018157     | NM_018157                  |
| 2.85E+02 | 8.15E+00  | mucin 5AC, oligo    | mucin 5AC, oligo    | NM_017511     | NM_017511                  |
| 2.85E+02 | 8.15E+00  | mucin 5AC, oligo    | mucin 5AC, oligo    | NM_017511     | NM_017511                  |
| 2.95E+02 | 8.21E+00  | plectin             | plectin             | NM_000445,NM  | NM_000445,NM_201378,NM_201 |
| 3.13E+02 | 8.29E+00  | notch 1             | notch 1             | NM_017617     | NM_017617                  |
| 2.26E+02 | 7.82E+00  | diacylglycerol lip: | KDEL (Lys-Asp-Gl    | NM_001142936, | NM_001142936,NM_139179     |
| 2.67E+02 | 8.06E+00  | MAGE-like 2         | MAGE-like 2         | NM_019066     | NM_019066                  |
| 2.67E+02 | 8.06E+00  | MAGE-like 2         | MAGE-like 2         | NM_019066     | NM_019066                  |
| 2.67E+02 | 8.06E+00  | MAGE-like 2         | neccdin homolog     | NM_019066     | NM_019066                  |
| 2.67E+02 | 8.06E+00  | MAGE-like 2         | neccdin homolog     | NM_019066     | NM_019066                  |
| 3.90E+02 | 8.61E+00  | nucleus accumbē     | nucleus accumbē     | NM_052876     | NM_052876                  |
| 3.90E+02 | 8.61E+00  | nucleus accumbē     | nucleus accumbē     | NM_052876     | NM_052876                  |
| 3.90E+02 | 8.61E+00  | nucleus accumbē     | nucleus accumbē     | NM_052876     | NM_052876                  |
| 2.46E+02 | 7.94E+00  | synaptotagmin V     | troponin I type 2   | NM_138567     | NM_138567                  |
| 2.46E+02 | 7.94E+00  | synaptotagmin V     | troponin I type 2   | NM_138567     | NM_138567                  |
| 2.98E-03 | -8.39E+00 | hypothetical LOC    | family with sequi   | NR_021493     | NR_021493                  |
| 2.98E-03 | -8.39E+00 | hypothetical LOC    | family with sequi   | NR_021493     | NR_021493                  |
| 2.01E+02 | 7.65E+00  | IQ motif containi   | CREB regulated t    | NM_003870     | NM_003870                  |
| 2.01E+02 | 7.65E+00  | CREB regulated t    | CREB regulated t    | NM_022769,NM  | NM_022769,NM_001042574     |
| 3.57E+02 | 8.48E+00  | keratin 86          | keratin 86          | NM_002284     | NM_002284                  |
| 2.30E+02 | 7.85E+00  | asparaginase hor    | kinesin family m    | NM_001080464  | NM_001080464               |
| 2.54E+02 | 7.99E+00  | tripartite motif-c  | tripartite motif-c  | NM_025058     | NM_025058                  |
| 3.64E+02 | 8.51E+00  | BAH domain and      | BAH domain and      | NM_001080519  | NM_001080519               |
| 3.64E+02 | 8.51E+00  | BAH domain and      | BAH domain and      | NM_001080519  | NM_001080519               |
| 3.64E+02 | 8.51E+00  | BAH domain and      | BAH domain and      | NM_001080519  | NM_001080519               |
| 3.79E-03 | -8.04E+00 | chymotrypsin-lik    | chymotrypsin-lik    | NM_007352     | NM_007352                  |
| 2.48E+02 | 7.95E+00  | paraneoplastic a    | paraneoplastic a    | NM_032882     | NM_032882                  |
| 3.10E-03 | -8.33E+00 | T-box 2             | T-box 2             | NM_005994     | NM_005994                  |
| 4.24E-03 | -7.88E+00 | D-dopachrome t:     | D-dopachrome t:     | NM_001355,NM  | NM_001355,NM_001084392     |
| 4.24E-03 | -7.88E+00 | D-dopachrome t:     | D-dopachrome t:     | NM_001355,NM  | NM_001355,NM_001084392     |
| 4.24E-03 | -7.88E+00 | D-dopachrome t:     | D-dopachrome t:     | NM_001355,NM  | NM_001355,NM_001084392     |
| 3.00E+02 | 8.23E+00  | null                | family with sequi   | null          | null                       |
| 3.00E+02 | 8.23E+00  | null                | family with sequi   | null          | null                       |
| 2.43E+02 | 7.92E+00  | EF-hand domain      | GRB10 interactin    | NM_025202     | NM_025202                  |
| 1.97E+02 | 7.62E+00  | tubulin tyrosine I  | tubulin tyrosine I  | NM_015140     | NM_015140                  |
| 4.25E-03 | -7.88E+00 | v-maf musculoar     | hypothetical LOC    | NM_032711,NM  | NM_032711,NM_002359        |
| 3.74E-03 | -8.06E+00 | inhibitor of CDK,   | inhibitor of CDK,   | NM_213726     | NM_213726                  |
| 2.44E+02 | 7.93E+00  | BR serine/threon    | BR serine/threon    | NM_003957     | NM_003957                  |
| 2.44E+02 | 7.93E+00  | BR serine/threon    | BR serine/threon    | NM_003957     | NM_003957                  |
| 4.18E-03 | -7.90E+00 | fucosyltransfera    | MAK16 homolog       | NM_032664     | NM_032664                  |
| 2.16E+02 | 7.76E+00  | testis-specific tra | testis-specific tra | NR_003593,NR_ | (NR_003593,NR_001540       |
| 4.94E-03 | -7.66E+00 | peroxisomal bio     | chromosome 19       | NM_080662     | NM_080662                  |
| 4.94E-03 | -7.66E+00 | peroxisomal bio     | chromosome 19       | NM_080662     | NM_080662                  |
| 4.98E-03 | -7.65E+00 | ubiquinol-cytoch    | MTERF domain c      | NM_006294     | NM_006294                  |
| 1.50E+00 | 5.85E-01  | POTE ankyrin do     | POTE ankyrin do     | NM_001005356, | NM_001005356,NR_027480     |
| 1.50E+00 | 5.85E-01  | POTE ankyrin do     | POTE ankyrin do     | NM_001005356, | NM_001005356,NR_027480     |
| 3.40E-03 | -8.20E+00 | RNA (guanine-7-)    | melanocortin 5 r    | NM_003799     | NM_003799                  |
| 4.92E-03 | -7.67E+00 | chromosome 6 o      | chromosome 6 o      | NR_026780     | NR_026780                  |

|          |           |                             |                     |                                         |                                         |
|----------|-----------|-----------------------------|---------------------|-----------------------------------------|-----------------------------------------|
| 2.54E+02 | 7.99E+00  | chromobox hom               | chromobox hom       | NM_020649                               | NM_020649                               |
| 3.16E+02 | 8.30E+00  | transmembrane               | transmembrane       | NM_021259                               | NM_021259                               |
| 3.86E-03 | -8.02E+00 | CD93 molecule               | NTF2-like export    | NM_012072                               | NM_012072                               |
| 2.84E+02 | 8.15E+00  | phospholipase A:            | phospholipase A:    | NM_003560,NM_0001004426                 | NM_003560,NM_0001004426                 |
| 4.40E+02 | 8.78E+00  | DIP2 disco-intera           | DIP2 disco-intera   | NM_014974                               | NM_014974                               |
| 2.30E+02 | 7.85E+00  | neuroblastoma b             | lymphocyte-spec     | NM_001102663                            | NM_001102663                            |
| 2.30E+02 | 7.85E+00  | neuroblastoma b             | lymphocyte-spec     | NM_001102663                            | NM_001102663                            |
| 2.30E+02 | 7.85E+00  | neuroblastoma b             | lymphocyte-spec     | NM_001102663                            | NM_001102663                            |
| 4.01E+02 | 8.65E+00  | speedy homolog              | speedy homolog      | NM_001008778                            | NM_001008778                            |
| 2.91E+02 | 8.19E+00  | calcium channel,            | calcium channel,    | NM_021098,NM_001005407                  | NM_021098,NM_001005407                  |
| 2.99E+02 | 8.22E+00  | scleraxis homolo            | heat shock transi   | NM_001008271, NM_001008271,NM_001080514 | NM_001008271, NM_001008271,NM_001080514 |
| 2.55E+02 | 8.00E+00  | CREB regulated t            | CREB regulated t    | NM_001098482, NM_001098482,NM_015321    | NM_001098482, NM_001098482,NM_015321    |
| 2.55E+02 | 8.00E+00  | CREB regulated t            | CREB regulated t    | NM_001098482, NM_001098482,NM_015321    | NM_001098482, NM_001098482,NM_015321    |
| 2.29E+02 | 7.84E+00  | sterile alpha mot           | sterile alpha mot   | NM_015589                               | NM_015589                               |
| 2.04E+02 | 7.67E+00  | glucocorticoid m            | stathmin-like 3     | NM_012384                               | NM_012384                               |
| 4.25E+02 | 8.73E+00  | cadherin, EGF LA            | cadherin, EGF LA    | NM_014246                               | NM_014246                               |
| 4.25E+02 | 8.73E+00  | cadherin, EGF LA            | cadherin, EGF LA    | NM_014246                               | NM_014246                               |
| 2.41E+02 | 7.91E+00  | anoctamin 9                 | anoctamin 9         | NM_001012302                            | NM_001012302                            |
| 4.09E+02 | 8.67E+00  | myosin binding p            | myosin binding p    | NM_000256                               | NM_000256                               |
| 2.01E+02 | 7.65E+00  | archaelysin famil           | archaelysin famil   | NM_133463                               | NM_133463                               |
| 2.01E+02 | 7.65E+00  | archaelysin famil           | archaelysin famil   | NM_133463                               | NM_133463                               |
| 2.79E+02 | 8.12E+00  | proline rich 23B            | proline rich 23B    | NM_001013650                            | NM_001013650                            |
| 2.74E+02 | 8.10E+00  | polymerase (RN <del>A</del> | fibroblast growthf  | NM_005035                               | NM_005035                               |
| 2.74E+02 | 8.10E+00  | polymerase (RN <del>A</del> | fibroblast growthf  | NM_005035                               | NM_005035                               |
| 2.74E+02 | 8.10E+00  | polymerase (RN <del>A</del> | fibroblast growthf  | NM_005035                               | NM_005035                               |
| 2.19E+02 | 7.78E+00  | Wolf-Hirschhorn             | Wolf-Hirschhorn     | NM_005663                               | NM_005663                               |
| 2.19E+02 | 7.78E+00  | Wolf-Hirschhorn             | Wolf-Hirschhorn     | NM_005663                               | NM_005663                               |
| 4.62E-03 | -7.76E+00 | CD72 molecule               | CD72 molecule       | NM_001782                               | NM_001782                               |
| 2.48E+02 | 7.95E+00  | ATP-binding cass            | ATP-binding cass    | NM_212533,NM_001606                     | NM_212533,NM_001606                     |
| 2.48E+02 | 7.95E+00  | ATP-binding cass            | ATP-binding cass    | NM_212533,NM_001606                     | NM_212533,NM_001606                     |
| 4.72E-03 | -7.73E+00 | family with sequi           | starch binding dc   | NM_001136570                            | NM_001136570                            |
| 3.33E+02 | 8.38E+00  | dipeptidase 1 (re           | dipeptidase 1 (re   | NM_004413                               | NM_004413                               |
| 3.10E+02 | 8.28E+00  | chromosome 2 o              | ankyrin repeat di   | NM_214461                               | NM_214461                               |
| 4.13E-03 | -7.92E+00 | CUGBP, Elav-like            | CUGBP, Elav-like    | NM_006561                               | NM_006561                               |
| 4.13E-03 | -7.92E+00 | CUGBP, Elav-like            | CUGBP, Elav-like    | NM_006561                               | NM_006561                               |
| 2.91E+02 | 8.19E+00  | Mps one binder I            | Mps one binder I    | NM_053005                               | NM_053005                               |
| 2.36E+02 | 7.88E+00  | sperm equatorial            | non-protein codi    | NM_145658                               | NM_145658                               |
| 2.36E+02 | 7.88E+00  | sperm equatorial            | non-protein codi    | NM_145658                               | NM_145658                               |
| 2.99E+02 | 8.22E+00  | thrombospondin              | thrombospondin      | NM_003247                               | NM_003247                               |
| 2.99E+02 | 8.22E+00  | thrombospondin              | thrombospondin      | NM_003247                               | NM_003247                               |
| 2.95E+02 | 8.21E+00  | TP53 target 3               | ubiquitin-conjug:   | NM_016212                               | NM_016212                               |
| 4.37E-03 | -7.84E+00 | ring finger protei          | inhibitor of DNA    | NM_182757                               | NM_182757                               |
| 3.91E+02 | 8.61E+00  | transcription fact          | extracellular leuc  | NR_001288                               | NR_001288                               |
| 2.56E+02 | 8.00E+00  | olfactory receptc           | SPRY domain cor     | NM_001005496                            | NM_001005496                            |
| 2.56E+02 | 8.00E+00  | olfactory receptc           | SPRY domain cor     | NM_001005496                            | NM_001005496                            |
| 3.18E+02 | 8.31E+00  | KIAA0284                    | phospholipase D     | NM_001112726, NM_001112726,NM_015005    | NM_001112726, NM_001112726,NM_015005    |
| 3.18E+02 | 8.31E+00  | KIAA0284                    | phospholipase D     | NM_001112726, NM_001112726,NM_015005    | NM_001112726, NM_001112726,NM_015005    |
| 3.04E+02 | 8.25E+00  | junctophilin 3              | junctophilin 3      | NM_020655                               | NM_020655                               |
| 3.04E+02 | 8.25E+00  | junctophilin 3              | junctophilin 3      | NM_020655                               | NM_020655                               |
| 3.01E+02 | 8.23E+00  | zinc finger protei          | zinc finger protei  | NM_145806                               | NM_145806                               |
| 3.31E+02 | 8.37E+00  | GIPC PDZ domair             | GIPC PDZ domair     | NM_133261                               | NM_133261                               |
| 3.31E+02 | 8.37E+00  | GIPC PDZ domair             | GIPC PDZ domair     | NM_133261                               | NM_133261                               |
| 2.08E+02 | 7.70E+00  | nuclear factor of           | nuclear factor of   | NM_020529                               | NM_020529                               |
| 2.25E+02 | 7.81E+00  | chromosome 3 o              | fragile histidine t | NM_198463                               | NM_198463                               |
| 2.25E+02 | 7.81E+00  | chromosome 3 o              | fragile histidine t | NM_198463                               | NM_198463                               |
| 3.06E+02 | 8.26E+00  | collagen, type V,           | collagen, type V,   | NM_000093                               | NM_000093                               |
| 3.36E+02 | 8.39E+00  | chloride channel            | chloride channel    | NM_001287,NM_001114331                  | NM_001287,NM_001114331                  |
| 2.82E+02 | 8.14E+00  | hypothetical pro            | hypothetical pro    | NR_002942                               | NR_002942                               |

|          |           |                    |                    |               |                             |
|----------|-----------|--------------------|--------------------|---------------|-----------------------------|
| 3.05E+02 | 8.25E+00  | protein tyrosine   | protein tyrosine   | NM_130842,NM  | NM_130842,NM_130843,NM_002  |
| 3.05E+02 | 8.25E+00  | protein tyrosine   | protein tyrosine   | NM_130842,NM  | NM_130842,NM_130843,NM_002  |
| 2.78E+02 | 8.12E+00  | transmembrane      | transmembrane      | NM_001145303, | NM_001145303,NM_144686      |
| 2.78E+02 | 8.12E+00  | transmembrane      | transmembrane      | NM_001145303, | NM_001145303,NM_144686      |
| 2.45E+02 | 7.94E+00  | topoisomerase (I   | pre-B lymphocyt    | NM_003935     | NM_003935                   |
| 2.45E+02 | 7.94E+00  | topoisomerase (I   | pre-B lymphocyt    | NM_003935     | NM_003935                   |
| 2.68E+02 | 8.06E+00  | pericentrin        | pericentrin        | NM_006031     | NM_006031                   |
| 3.90E+02 | 8.61E+00  | ankyrin repeat d   | G protein-couple   | NR_027019,NR_ | (NR_027019,NR_027020        |
| 3.90E+02 | 8.61E+00  | ankyrin repeat d   | G protein-couple   | NR_027019,NR_ | (NR_027019,NR_027020        |
| 3.90E+02 | 8.61E+00  | ankyrin repeat d   | G protein-couple   | NR_027019,NR_ | (NR_027019,NR_027020        |
| 2.47E+02 | 7.95E+00  | agrln              | agrln              | NM_198576     | NM_198576                   |
| 2.47E+02 | 7.95E+00  | agrln              | agrln              | NM_198576     | NM_198576                   |
| 2.47E+02 | 7.95E+00  | agrln              | agrln              | NM_198576     | NM_198576                   |
| 2.47E+02 | 7.95E+00  | agrln              | agrln              | NM_198576     | NM_198576                   |
| 2.77E+02 | 8.11E+00  | trinucleotide rep  | trinucleotide rep  | NM_001080495  | NM_001080495                |
| 3.08E+02 | 8.27E+00  | lipocalin 10       | lipocalin 6        | NM_001001712  | NM_001001712                |
| 3.08E+02 | 8.27E+00  | lipocalin 6        | lipocalin 6        | NM_198946     | NM_198946                   |
| 2.74E+02 | 8.10E+00  | ankyrin 1, erythr  | ankyrin 1, erythr  | NM_001142446, | NM_001142446,NM_001142445,N |
| 3.10E+02 | 8.28E+00  | TGF-beta activati  | mannosyl (beta-    | NM_153497,NM  | NM_153497,NM_006116         |
| 2.69E+02 | 8.07E+00  | ATP-binding cass   | ATP-binding cass   | NM_001089     | NM_001089                   |
| 2.69E+02 | 8.07E+00  | ATP-binding cass   | ATP-binding cass   | NM_001089     | NM_001089                   |
| 2.69E+02 | 8.07E+00  | ATP-binding cass   | ATP-binding cass   | NM_001089     | NM_001089                   |
| 2.88E+02 | 8.17E+00  | latent transformi  | latent transformi  | NM_001130144, | NM_001130144,NM_021070      |
| 3.69E-03 | -8.08E+00 | ER degradation e   | glutamate recept   | NM_014674     | NM_014674                   |
| 3.69E-03 | -8.08E+00 | ER degradation e   | glutamate recept   | NM_014674     | NM_014674                   |
| 3.41E-03 | -8.20E+00 | syntaxin 2         | RAN, member R/     | NM_001980,NM  | NM_001980,NM_194356         |
| 3.41E-03 | -8.20E+00 | syntaxin 2         | RAN, member R/     | NM_001980,NM  | NM_001980,NM_194356         |
| 2.30E+02 | 7.85E+00  | syntaphilin        | syntaphilin        | NM_014723     | NM_014723                   |
| 2.91E+02 | 8.19E+00  | rhomboïd 5 hom     | rhomboïd 5 hom     | NM_001005498, | NM_001005498,NM_024599      |
| 2.64E+02 | 8.04E+00  | ribosomal RNA p    | ribosomal RNA p    | NR_002184     | NR_002184                   |
| 2.64E+02 | 8.04E+00  | ribosomal RNA p    | ribosomal RNA p    | NR_002184     | NR_002184                   |
| 3.19E+02 | 8.32E+00  | TBC1 domain fan    | TBC1 domain fan    | NM_020705     | NM_020705                   |
| 3.19E+02 | 8.32E+00  | TBC1 domain fan    | TBC1 domain fan    | NM_020705     | NM_020705                   |
| 3.16E+02 | 8.30E+00  | transmembrane      | KIAA0125           | NM_025268     | NM_025268                   |
| 3.16E+02 | 8.30E+00  | transmembrane      | KIAA0125           | NM_025268     | NM_025268                   |
| 2.30E+02 | 7.85E+00  | zinc finger, SWIM  | nanos homolog 3    | NM_023072     | NM_023072                   |
| 3.05E+02 | 8.25E+00  | chromosome 20      | chromosome 20      | NM_199181     | NM_199181                   |
| 2.77E+02 | 8.11E+00  | dihydrouridine s   | fatty acid syntha  | NM_022156     | NM_022156                   |
| 2.55E+02 | 8.00E+00  | protein kinase C   | protein kinase C   | NM_020804     | NM_020804                   |
| 2.61E+02 | 8.03E+00  | myosin, heavy c    | myosin, heavy c    | NM_001145809, | NM_001145809,NM_024729,NM_  |
| 2.61E+02 | 8.03E+00  | myosin, heavy c    | myosin, heavy c    | NM_001145809, | NM_001145809,NM_024729,NM_  |
| 2.48E+02 | 7.95E+00  | tight junction prc | tight junction prc | NM_201629,NM  | NM_201629,NM_004817         |
| 2.48E+02 | 7.95E+00  | tight junction prc | tight junction prc | NM_201629,NM  | NM_201629,NM_004817         |
| 4.52E-03 | -7.79E+00 | BMS1 homolog, i    | ret proto-oncoge   | NM_014753     | NM_014753                   |
| 2.62E+02 | 8.03E+00  | mucin 6, oligome   | mucin 6, oligome   | NM_005961     | NM_005961                   |
| 2.62E+02 | 8.03E+00  | mucin 6, oligome   | mucin 6, oligome   | NM_005961     | NM_005961                   |
| 2.99E+02 | 8.22E+00  | opioid receptor,   | ATPase, H+ trans   | NM_000912     | NM_000912                   |
| 2.99E+02 | 8.22E+00  | opioid receptor,   | ATPase, H+ trans   | NM_000912     | NM_000912                   |
| 3.35E+02 | 8.39E+00  | alkB, alkylati     | alkB, alkylati     | NM_017621     | NM_017621                   |
| 3.35E+02 | 8.39E+00  | alkB, alkylati     | alkB, alkylati     | NM_017621     | NM_017621                   |
| 3.65E+02 | 8.51E+00  | protein tyrosine   | protein tyrosine   | NM_002840,NM  | NM_002840,NM_130440         |
| 3.65E+02 | 8.51E+00  | protein tyrosine   | protein tyrosine   | NM_002840,NM  | NM_002840,NM_130440         |
| 3.37E+02 | 8.40E+00  | family with sequ   | hippocampus ab     | NM_017561     | NM_017561                   |
| 3.37E+02 | 8.40E+00  | family with sequ   | hippocampus ab     | NM_017561     | NM_017561                   |
| 2.93E+02 | 8.20E+00  | unc-51-like kinas  | pseudouridylate    | NM_003565     | NM_003565                   |
| 2.93E+02 | 8.20E+00  | unc-51-like kinas  | pseudouridylate    | NM_003565     | NM_003565                   |
| 3.00E+02 | 8.23E+00  | chromosome 19      | BTB (POZ) domai    | NM_152771     | NM_152771                   |
| 3.00E+02 | 8.23E+00  | chromosome 19      | BTB (POZ) domai    | NM_152771     | NM_152771                   |

|          |           |                                                     |                                        |                                        |
|----------|-----------|-----------------------------------------------------|----------------------------------------|----------------------------------------|
| 3.00E+02 | 8.23E+00  | chromosome 19 BTB (POZ) domain                      | NM_152771                              | NM_152771                              |
| 2.44E+02 | 7.93E+00  | defensin, beta 1 zinc finger protein                | NM_001037804                           | NM_001037804                           |
| 2.44E+02 | 7.93E+00  | defensin, beta 1 zinc finger protein                | NM_001037804                           | NM_001037804                           |
| 2.69E+02 | 8.07E+00  | kringle containing kringle containing               | NM_024507,NM_172229                    | NM_024507,NM_172229                    |
| 4.64E-03 | -7.75E+00 | non-protein coding non-protein coding               | NR_002811                              | NR_002811                              |
| 4.35E-03 | -7.84E+00 | dolichyl-diphosphol kinesin family member           | NM_005216                              | NM_005216                              |
| 2.66E+02 | 8.05E+00  | apratxin DnaJ (Hsp40) homolog                       | NM_175069,NM_175073,NM_175073          | NM_175069,NM_175073,NM_175073          |
| 3.02E+02 | 8.24E+00  | C2 calcium-dependent C2 calcium-dependent           | NM_001136263                           | NM_001136263                           |
| 4.01E+02 | 8.65E+00  | cholinergic receptor cholinergic receptor           | NM_000742                              | NM_000742                              |
| 4.81E-03 | -7.70E+00 | KIAA1267 leucine rich repeat                        | NM_015443                              | NM_015443                              |
| 2.10E+02 | 7.71E+00  | DAB2 interacting DAB2 interacting                   | NM_138709                              | NM_138709                              |
| 2.83E+02 | 8.14E+00  | chromosome 16 family with sequence                  | NM_001040165,NM_001040165,NM_001040165 | NM_001040165,NM_001040165,NM_001040165 |
| 3.53E-03 | -8.14E+00 | zinc finger protein transmembrane                   | NM_015069                              | NM_015069                              |
| 3.53E-03 | -8.14E+00 | zinc finger protein transmembrane                   | NM_015069                              | NM_015069                              |
| 2.32E+02 | 7.86E+00  | MAP/microtubule MAP/microtubule                     | NM_031417                              | NM_031417                              |
| 1.99E+02 | 7.64E+00  | age-related macro HtrA serine protease              | NM_001099667                           | NM_001099667                           |
| 2.86E+02 | 8.16E+00  | calcium channel, calcium channel,                   | NM_021098,NM_001005407                 | NM_021098,NM_001005407                 |
| 2.86E+02 | 8.16E+00  | calcium channel, calcium channel,                   | NM_021098,NM_001005407                 | NM_021098,NM_001005407                 |
| 5.52E-03 | -7.50E+00 | Src homology 2 c Src homology 2 c                   | NM_001010846                           | NM_001010846                           |
| 3.27E-03 | -8.26E+00 | olfactory receptor olfactory receptor               | NM_001001964                           | NM_001001964                           |
| 3.27E-03 | -8.26E+00 | olfactory receptor olfactory receptor               | NM_001001964                           | NM_001001964                           |
| 4.13E-03 | -7.92E+00 | ATPase, class I, trans solute carrier family        | NM_024837                              | NM_024837                              |
| 2.61E+02 | 8.03E+00  | GNAS complex locus GNAS complex locus               | NM_016592                              | NM_016592                              |
| 2.83E+02 | 8.14E+00  | SRY (sex determining hypothetical LOC)              | NM_014587                              | NM_014587                              |
| 3.11E+02 | 8.28E+00  | peptide YY, 2 (secretory pancreatic polypeptide)    | NR_003064                              | NR_003064                              |
| 2.60E+02 | 8.02E+00  | amino-terminal epsilon amino-terminal epsilon       | NM_198970,NM_001130,NM_198970          | NM_198970,NM_001130,NM_198970          |
| 4.54E+02 | 8.83E+00  | PEG3 antisense F MER1 repeat core                   | NR_023847                              | NR_023847                              |
| 4.54E+02 | 8.83E+00  | PEG3 antisense F MER1 repeat core                   | NR_023847                              | NR_023847                              |
| 2.64E+02 | 8.04E+00  | glutamate-rich 1 discs, large (Drosophila)          | NM_207332                              | NM_207332                              |
| 2.76E+02 | 8.11E+00  | tubulin folding core tubulin folding core           | NM_005993                              | NM_005993                              |
| 3.99E-03 | -7.97E+00 | sarcoglycan, beta spermatogenesis                   | NM_000232                              | NM_000232                              |
| 4.32E-03 | -7.86E+00 | small nucleolar R LIM and SH3 protein               | NR_002576                              | NR_002576                              |
| 4.32E-03 | -7.86E+00 | small nucleolar R LIM and SH3 protein               | NR_002576                              | NR_002576                              |
| 2.44E+02 | 7.93E+00  | protein tyrosine protein tyrosine                   | NM_007079,NM_032611                    | NM_007079,NM_032611                    |
| 2.90E+02 | 8.18E+00  | zinc finger protein zinc finger protein             | NM_178167                              | NM_178167                              |
| 2.90E+02 | 8.18E+00  | zinc finger protein zinc finger protein             | NM_178167                              | NM_178167                              |
| 3.62E+02 | 8.50E+00  | natural killer-tumor zinc finger and beta           | NM_005385                              | NM_005385                              |
| 2.94E+02 | 8.20E+00  | GTP binding protein GTP binding protein             | NM_012227                              | NM_012227                              |
| 2.94E+02 | 8.20E+00  | GTP binding protein GTP binding protein             | NM_012227                              | NM_012227                              |
| 2.59E+02 | 8.02E+00  | GTP binding protein GTP binding protein             | NM_012227                              | NM_012227                              |
| 2.59E+02 | 8.02E+00  | GTP binding protein GTP binding protein             | NM_012227                              | NM_012227                              |
| 2.59E+02 | 8.02E+00  | GTP binding protein GTP binding protein             | NM_012227                              | NM_012227                              |
| 2.03E+02 | 7.66E+00  | strawberry notch strawberry notch                   | NM_001100122,NM_014963                 | NM_001100122,NM_014963                 |
| 3.86E-03 | -8.02E+00 | thyrotropin-releasing thyrotropin-releasing         | NM_013381                              | NM_013381                              |
| 4.70E-03 | -7.73E+00 | ADAM metalloprotein non-protein coding              | NR_002224                              | NR_002224                              |
| 2.76E+02 | 8.11E+00  | protease, serine, family with sequence              | NM_183375                              | NM_183375                              |
| 4.01E+02 | 8.65E+00  | protein tyrosine protein tyrosine                   | NM_133178,NM_133177,NM_005             | NM_133178,NM_133177,NM_005             |
| 4.01E+02 | 8.65E+00  | protein tyrosine protein tyrosine                   | NM_133178,NM_133177,NM_005             | NM_133178,NM_133177,NM_005             |
| 2.90E+02 | 8.18E+00  | discs, large (Drosophila) discs, large (Drosophila) | NM_004745                              | NM_004745                              |
| 2.90E+02 | 8.18E+00  | discs, large (Drosophila) discs, large (Drosophila) | NM_004745                              | NM_004745                              |
| 2.23E+02 | 7.80E+00  | kinesin family member kinesin family member         | NM_015656                              | NM_015656                              |
| 2.23E+02 | 7.80E+00  | kinesin family member kinesin family member         | NM_015656                              | NM_015656                              |
| 4.25E-03 | -7.88E+00 | ribosomal protein ribosomal protein                 | NM_002948                              | NM_002948                              |
| 4.25E-03 | -7.88E+00 | ribosomal protein ribosomal protein                 | NM_002948                              | NM_002948                              |
| 3.46E+02 | 8.43E+00  | tyrosine hydroxylase achaete-scute complex          | NM_199293,NM_199292,NM_000             | NM_199293,NM_199292,NM_000             |
| 2.81E+02 | 8.13E+00  | septin 7 endonuclease/exon                          | NM_001788,NM_001011553                 | NM_001788,NM_001011553                 |
| 2.81E+02 | 8.13E+00  | septin 7 endonuclease/exon                          | NM_001788,NM_001011553                 | NM_001788,NM_001011553                 |
| 3.21E-03 | -8.29E+00 | germ cell associated chromosome 17                  | NM_031965                              | NM_031965                              |



|          |           |                                       |                                             |              |
|----------|-----------|---------------------------------------|---------------------------------------------|--------------|
| 2.15E+02 | 7.75E+00  | DnaJ (Hsp40) hor protein tyrosine     | NM_058246                                   | NM_058246    |
| 2.15E+02 | 7.75E+00  | DnaJ (Hsp40) hor protein tyrosine     | NM_058246                                   | NM_058246    |
| 3.82E+02 | 8.58E+00  | solute carrier org solute carrier org | NM_016354                                   | NM_016354    |
| 3.69E-03 | -8.08E+00 | small nuclear ribo lin-7 homolog B    | NM_003089                                   | NM_003089    |
| 2.89E+02 | 8.17E+00  | cytochrome b-56 cytochrome b-56       | NM_001017917, NM_001017917, NM_001017916, N |              |
| 3.30E+02 | 8.36E+00  | small nucleolar R small nucleolar R   | NR_000013                                   | NR_000013    |
| 3.30E+02 | 8.36E+00  | small nucleolar R small nucleolar R   | NR_000013                                   | NR_000013    |
| 2.30E+02 | 7.84E+00  | neuronal pentra> chromobox hom        | NM_014293                                   | NM_014293    |
| 2.26E+02 | 7.82E+00  | Ets2 repressor fa capicua homolog     | NM_006494                                   | NM_006494    |
| 2.33E+02 | 7.87E+00  | zinc finger CCCH- interleukin 17C     | NM_144604                                   | NM_144604    |
| 2.63E+02 | 8.04E+00  | salt-inducible kin salt-inducible kin | NM_173354                                   | NM_173354    |
| 2.63E+02 | 8.04E+00  | salt-inducible kin salt-inducible kin | NM_173354                                   | NM_173354    |
| 2.84E+02 | 8.15E+00  | nuclear factor of nuclear factor of   | NM_001001716, NM_001001716, NM_002503       |              |
| 2.84E+02 | 8.15E+00  | nuclear factor of nuclear factor of   | NM_001001716, NM_001001716, NM_002503       |              |
| 3.39E+02 | 8.41E+00  | diacylglycerol kin diacylglycerol kir | NM_001105540                                | NM_001105540 |
| 2.64E+02 | 8.04E+00  | collagen, type IX, collagen, type IX, | NM_001853                                   | NM_001853    |
| 3.46E+02 | 8.43E+00  | protein tyrosine tyrosinase-relate    | NM_002839, NM_002839, NM_130391, NM_13C     |              |
| 3.46E+02 | 8.43E+00  | protein tyrosine tyrosinase-relate    | NM_002839, NM_002839, NM_130391, NM_13C     |              |
| 2.44E+02 | 7.93E+00  | A kinase (PRKA) ε widely interspac    | NM_014371                                   | NM_014371    |
| 4.09E-03 | -7.93E+00 | ZFAT antisense R hypothetical LOC     | NR_002438                                   | NR_002438    |
| 4.09E-03 | -7.93E+00 | ZFAT antisense R hypothetical LOC     | NR_002438                                   | NR_002438    |
| 2.84E+02 | 8.15E+00  | PTK6 protein tyr PTK6 protein tyr     | NM_005975                                   | NM_005975    |
| 3.77E-03 | -8.05E+00 | protocadherin 12 ring finger protei   | NM_016580                                   | NM_016580    |
| 3.77E-03 | -8.05E+00 | protocadherin 12 ring finger protei   | NM_016580                                   | NM_016580    |
| 3.07E+02 | 8.26E+00  | leucine rich repe leucine rich repe   | NM_020862                                   | NM_020862    |
| 2.36E+02 | 7.88E+00  | protocadherin 9 kelch-like 1 (Dro:    | NM_020403, NM_020403, NM_203487             |              |
| 2.36E+02 | 7.88E+00  | protocadherin 9 kelch-like 1 (Dro:    | NM_020403, NM_020403, NM_203487             |              |
| 1.98E+02 | 7.63E+00  | midnolin chromosome 19                | NM_177401                                   | NM_177401    |
| 2.93E+02 | 8.20E+00  | solute carrier fan solute carrier fan | NM_018484                                   | NM_018484    |
| 3.66E+02 | 8.51E+00  | small nucleolar R small nucleolar R   | NR_002326                                   | NR_002326    |
| 2.72E+02 | 8.09E+00  | EFR3 homolog B EFR3 homolog B         | NM_014971                                   | NM_014971    |
| 2.72E+02 | 8.09E+00  | EFR3 homolog B EFR3 homolog B         | NM_014971                                   | NM_014971    |
| 3.07E+02 | 8.26E+00  | CCCTC-binding fa phosphoenolpyri      | NM_080618                                   | NM_080618    |
| 3.07E+02 | 8.26E+00  | CCCTC-binding fa phosphoenolpyri      | NM_080618                                   | NM_080618    |
| 3.07E+02 | 8.26E+00  | CCCTC-binding fa phosphoenolpyri      | NM_080618                                   | NM_080618    |
| 3.07E+02 | 8.26E+00  | CCCTC-binding fa phosphoenolpyri      | NM_080618                                   | NM_080618    |
| 3.07E+02 | 8.26E+00  | CCCTC-binding fa phosphoenolpyri      | NM_080618                                   | NM_080618    |
| 2.34E+02 | 7.87E+00  | ras homolog gen RAB4A, member         | NM_021205                                   | NM_021205    |
| 2.76E+02 | 8.11E+00  | integrin beta 1 bi integrin beta 1 bi | NM_170678                                   | NM_170678    |
| 3.52E-03 | -8.15E+00 | glutamine--fruct NFU1 iron-sulfur     | NM_002056                                   | NM_002056    |
| 3.52E-03 | -8.15E+00 | glutamine--fruct NFU1 iron-sulfur     | NM_002056                                   | NM_002056    |
| 4.22E-03 | -7.89E+00 | chromosome 12 pleckstrin homol        | NM_001037671                                | NM_001037671 |
| 4.22E-03 | -7.89E+00 | pleckstrin homol pleckstrin homol     | NM_001004330                                | NM_001004330 |
| 2.78E+02 | 8.12E+00  | chromosome 10 chromosome 10           | NM_017609                                   | NM_017609    |
| 2.15E+02 | 7.75E+00  | uronyl-2-sulfotra TGF-beta activati   | NM_005715                                   | NM_005715    |
| 2.50E+02 | 7.96E+00  | cadherin 4, type TAF4 RNA polym       | NM_001794                                   | NM_001794    |
| 2.19E+02 | 7.78E+00  | protein tyrosine protein tyrosine     | NM_130842, NM_130842, NM_130843, NM_002     |              |
| 2.19E+02 | 7.78E+00  | protein tyrosine protein tyrosine     | NM_130842, NM_130842, NM_130843, NM_002     |              |
| 2.38E+02 | 7.90E+00  | Smith-Magenis s' Smith-Magenis s'     | NM_148886                                   | NM_148886    |
| 3.94E-03 | -7.99E+00 | splA/ryanodine r solute carrier fan   | NM_025106                                   | NM_025106    |
| 2.16E+02 | 7.76E+00  | inositol-3-phosph elongation factoi   | NM_016368                                   | NM_016368    |
| 2.52E+02 | 7.98E+00  | tubulin polymeri: zinc finger, DHH    | NM_007030                                   | NM_007030    |
| 4.52E-03 | -7.79E+00 | chromosome 21 neural cell adhes       | NR_024090                                   | NR_024090    |
| 4.52E-03 | -7.79E+00 | chromosome 21 neural cell adhes       | NR_024090                                   | NR_024090    |
| 2.63E+02 | 8.04E+00  | NAD synthetase : keratin associate    | NM_018161                                   | NM_018161    |
| 5.11E-03 | -7.61E+00 | family with sequi EPH receptor A2     | NM_182623                                   | NM_182623    |
| 2.30E+02 | 7.84E+00  | chromosome 20 chromosome 20           | NM_199181                                   | NM_199181    |
| 2.30E+02 | 7.84E+00  | chromosome 20 chromosome 20           | NM_199181                                   | NM_199181    |

|          |           |                                                                                 |                                             |
|----------|-----------|---------------------------------------------------------------------------------|---------------------------------------------|
| 2.15E+02 | 7.75E+00  | DIRAS family, GT DIRAS family, GT NM_145173                                     | NM_145173                                   |
| 2.15E+02 | 7.75E+00  | DIRAS family, GT DIRAS family, GT NM_145173                                     | NM_145173                                   |
| 4.05E-03 | -7.95E+00 | Bartter syndromi proprotein conve NM_057176                                     | NM_057176                                   |
| 4.05E-03 | -7.95E+00 | Bartter syndromi proprotein conve NM_057176                                     | NM_057176                                   |
| 2.69E+02 | 8.07E+00  | complement con STEAP family me NM_182528                                        | NM_182528                                   |
| 4.15E-03 | -7.91E+00 | protein tyrosine signal transducin NM_014241                                    | NM_014241                                   |
| 2.34E+02 | 7.87E+00  | sperm associatet phosphatidylinos NM_012443,NM_012443,NM_172242                 | NM_012443,NM_012443,NM_172242               |
| 2.10E+02 | 7.72E+00  | p21 protein (Cdc p21 protein (Cdc NM_001014834, NM_001014834, NM_001014832, N   | NM_001014834, NM_001014834, NM_001014832, N |
| 2.68E+02 | 8.06E+00  | abhydrolase dom chromosome 3 o NM_016006                                        | NM_016006                                   |
| 2.68E+02 | 8.06E+00  | abhydrolase dom chromosome 3 o NM_016006                                        | NM_016006                                   |
| 2.84E+02 | 8.15E+00  | ribosomal protei connector enhan NM_004586                                      | NM_004586                                   |
| 2.37E+02 | 7.89E+00  | E2F transcription E2F transcription NM_005225                                   | NM_005225                                   |
| 3.07E+02 | 8.26E+00  | hypothetical LOC transmembrane NR_024473                                        | NR_024473                                   |
| 3.19E+02 | 8.32E+00  | family with sequi family with sequi NM_198488                                   | NM_198488                                   |
| 2.75E+02 | 8.10E+00  | hypothetical LOC splicing factor, a1 NR_026670                                  | NR_026670                                   |
| 2.75E+02 | 8.10E+00  | hypothetical LOC splicing factor, a1 NR_026670                                  | NR_026670                                   |
| 4.85E-03 | -7.69E+00 | von Willebrand f. CD9 molecule NM_000552                                        | NM_000552                                   |
| 2.64E+02 | 8.04E+00  | phosphatidylinos phosphatidylinos NM_004910,NM_004910,NM_001130848              | NM_004910,NM_004910,NM_001130848            |
| 2.64E+02 | 8.04E+00  | phosphatidylinos phosphatidylinos NM_004910,NM_004910,NM_001130848              | NM_004910,NM_004910,NM_001130848            |
| 2.64E+02 | 8.04E+00  | phosphatidylinos phosphatidylinos NM_004910,NM_004910,NM_001130848              | NM_004910,NM_004910,NM_001130848            |
| 4.88E-03 | -7.68E+00 | LIM domain bind quinoid dihydroç NM_001130834, NM_001130834, NM_001290          | NM_001130834, NM_001130834, NM_001290       |
| 3.81E-03 | -8.04E+00 | chromosome 9 o carbonic anhydr: NM_032818                                       | NM_032818                                   |
| 2.70E+02 | 8.08E+00  | deleted in azoos; deleted in azoos; NM_001351                                   | NM_001351                                   |
| 2.74E+02 | 8.10E+00  | MAD1 mitotic ar MAD1 mitotic ar NM_003550,NM_003550,NM_001013837,NM_            | NM_003550,NM_003550,NM_001013837,NM_        |
| 3.00E+02 | 8.23E+00  | nuclear prelamin mesothelin NM_022493                                           | NM_022493                                   |
| 2.42E+02 | 7.92E+00  | G-protein signalii G-protein signalii NM_001145638, NM_001145638, NM_015597     | NM_001145638, NM_001145638, NM_015597       |
| 4.47E-03 | -7.81E+00 | phosphopantoth phosphopantoth NM_001077447, NM_001077447, NM_024664             | NM_001077447, NM_001077447, NM_024664       |
| 3.47E+02 | 8.44E+00  | GRAM domain cç GRAM domain cç NM_020895,NM_020895,NM_001136199                  | NM_020895,NM_020895,NM_001136199            |
| 3.47E+02 | 8.44E+00  | GRAM domain cç GRAM domain cç NM_020895,NM_020895,NM_001136199                  | NM_020895,NM_020895,NM_001136199            |
| 2.04E+00 | 1.03E+00  | null POTE ankyrin doi null null                                                 | null null                                   |
| 2.04E+00 | 1.03E+00  | null POTE ankyrin doi null null                                                 | null null                                   |
| 2.27E+02 | 7.82E+00  | glucokinase (hexi glucokinase (hex NM_000162,NM_000162,NM_033508,NM_033         | NM_000162,NM_000162,NM_033508,NM_033        |
| 2.30E+02 | 7.85E+00  | methyltransferas methyltransferas NM_024086                                     | NM_024086                                   |
| 2.58E+02 | 8.01E+00  | family with sequi family with sequi NR_024019,NM_024019,NM_019057               | NR_024019,NM_024019,NM_019057               |
| 2.83E+02 | 8.14E+00  | H19, imprinted n insulin-like growl NR_002196                                   | NR_002196                                   |
| 2.83E+02 | 8.14E+00  | H19, imprinted n insulin-like growl NR_002196                                   | NR_002196                                   |
| 3.93E-03 | -7.99E+00 | erythrocyte men chromosome 20 NM_012156                                         | NM_012156                                   |
| 2.51E+02 | 7.97E+00  | eukaryotic transl eukaryotic transl NM_001958                                   | NM_001958                                   |
| 2.86E+02 | 8.16E+00  | forkhead box F2 forkhead box C1 NM_001452                                       | NM_001452                                   |
| 2.86E+02 | 8.16E+00  | forkhead box F2 forkhead box C1 NM_001452                                       | NM_001452                                   |
| 4.68E-03 | -7.74E+00 | TATA box binding adenosine deami NM_139353,NM_139353,NM_005679                  | NM_139353,NM_139353,NM_005679               |
| 4.68E-03 | -7.74E+00 | TATA box binding adenosine deami NM_139353,NM_139353,NM_005679                  | NM_139353,NM_139353,NM_005679               |
| 3.14E-03 | -8.32E+00 | zinc finger protei zinc finger protei NM_030613                                 | NM_030613                                   |
| 3.14E-03 | -8.32E+00 | zinc finger protei zinc finger protei NM_030613                                 | NM_030613                                   |
| 3.94E+02 | 8.62E+00  | tuberous sclerosi tuberous sclerosi NM_000548,NM_000548,NM_001077183,NM_        | NM_000548,NM_000548,NM_001077183,NM_        |
| 3.53E+02 | 8.46E+00  | G protein-couple hypothetical LOC NM_198827                                     | NM_198827                                   |
| 3.53E+02 | 8.46E+00  | G protein-couple hypothetical LOC NM_198827                                     | NM_198827                                   |
| 2.34E+02 | 7.87E+00  | PR domain conta PR domain conta NM_021619                                       | NM_021619                                   |
| 2.34E+02 | 7.87E+00  | PR domain conta PR domain conta NM_021619                                       | NM_021619                                   |
| 2.50E+02 | 7.96E+00  | ankyrin repeat d; F-box protein, he NM_001009942, NM_001009942, NM_001009943, N | NM_001009942, NM_001009942, NM_001009943, N |
| 4.11E-03 | -7.93E+00 | caspase 10, apoç caspase 8, apopt NM_001230,NM_001230,NM_032977,NM_032          | NM_001230,NM_001230,NM_032977,NM_032        |
| 2.74E+02 | 8.10E+00  | postmeiotic segr GATS protein-like NM_174930                                    | NM_174930                                   |
| 3.54E+02 | 8.47E+00  | apolipoprotein C apolipoprotein C NM_000483                                     | NM_000483                                   |
| 2.60E+02 | 8.02E+00  | myosin IG myosin IG NM_033054                                                   | NM_033054                                   |
| 3.18E+02 | 8.31E+00  | vav 2 guanine nu vav 2 guanine nu NM_001134398, NM_001134398, NM_003371         | NM_001134398, NM_001134398, NM_003371       |
| 2.92E+02 | 8.19E+00  | transmembrane transmembrane NM_020665                                           | NM_020665                                   |
| 2.92E+02 | 8.19E+00  | transmembrane transmembrane NM_020665                                           | NM_020665                                   |
| 3.06E+02 | 8.26E+00  | MAP kinase inter MAP kinase inter NM_017572,NM_017572,NM_199054                 | NM_017572,NM_017572,NM_199054               |

|          |           |                    |                    |                                         |              |
|----------|-----------|--------------------|--------------------|-----------------------------------------|--------------|
| 2.42E+02 | 7.92E+00  | ADAM metallope     | ADAM metallope     | NM_001109                               | NM_001109    |
| 2.42E+02 | 7.92E+00  | ADAM metallope     | ADAM metallope     | NM_001109                               | NM_001109    |
| 2.23E+02 | 7.80E+00  | zinc finger protei | zinc finger protei | NR_003952                               | NR_003952    |
| 4.30E-03 | -7.86E+00 | olfactory receptc  | chromosome 1 o     | NM_198074                               | NM_198074    |
| 4.30E-03 | -7.86E+00 | olfactory receptc  | chromosome 1 o     | NM_198074                               | NM_198074    |
| 3.71E-03 | -8.07E+00 | translocase of ini | translocase of ini | NM_005834                               | NM_005834    |
| 3.71E-03 | -8.07E+00 | translocase of ini | translocase of ini | NM_005834                               | NM_005834    |
| 2.32E+02 | 7.86E+00  | lysophosphatidyl   | lysophosphatidyl   | NM_024830                               | NM_024830    |
| 2.32E+02 | 7.86E+00  | lysophosphatidyl   | lysophosphatidyl   | NM_024830                               | NM_024830    |
| 2.41E+02 | 7.91E+00  | protein phosphat   | protein phosphat   | NM_001145115                            | NM_001145115 |
| 2.41E+02 | 7.91E+00  | protein phosphat   | protein phosphat   | NM_001145115                            | NM_001145115 |
| 2.66E+02 | 8.05E+00  | family with sequi  | family with sequi  | NM_001130111, NM_001130111, NM_031213   |              |
| 2.53E+02 | 7.98E+00  | AHNAK nucleopr     | AHNAK nucleopr     | NM_024060                               | NM_024060    |
| 3.77E-03 | -8.05E+00 | RAB GTPase activ   | calcyclin binding  | NM_001035230                            | NM_001035230 |
| 3.77E-03 | -8.05E+00 | RAB GTPase activ   | calcyclin binding  | NM_001035230                            | NM_001035230 |
| 3.90E+02 | 8.61E+00  | galactosamine (N   | galactosamine (N   | NM_000512                               | NM_000512    |
| 3.58E-03 | -8.13E+00 | small nucleolar R  | lymphocyte tran:   | NR_003019                               | NR_003019    |
| 3.58E-03 | -8.13E+00 | lymphocyte tran:   | lymphocyte tran:   | NM_001136190, NM_001136190, NM_017773   |              |
| 2.36E+02 | 7.88E+00  | MAX dimerizatio    | aspartic peptidas  | NM_002357                               | NM_002357    |
| 2.36E+02 | 7.88E+00  | MAX dimerizatio    | aspartic peptidas  | NM_002357                               | NM_002357    |
| 4.90E-03 | -7.67E+00 | Rho GTPase activ   | secretogranin V (  | NM_199357, NM_199357, NM_014783         |              |
| 2.08E+02 | 7.70E+00  | multiple C2 dom:   | multiple C2 dom:   | NM_024717, NM_024717, NM_001002796      |              |
| 3.28E+02 | 8.36E+00  | myocilin, trabecu  | vesicle-associate  | NM_000261                               | NM_000261    |
| 3.28E+02 | 8.36E+00  | myocilin, trabecu  | vesicle-associate  | NM_000261                               | NM_000261    |
| 2.10E+02 | 7.71E+00  | paired box 6       | reticulocalbin 1,  | NM_001604, NM_001604, NM_000280, NM_001 |              |
| 2.36E+02 | 7.88E+00  | vacuolar protein   | vacuolar protein   | NM_024667                               | NM_024667    |
| 3.68E-03 | -8.09E+00 | phosphoribosyl r   | solute carrier fan | NM_002767                               | NM_002767    |
| 5.11E-03 | -7.61E+00 | small nucleolar R  | zinc finger protei | NR_002962                               | NR_002962    |
| 2.52E+02 | 7.98E+00  | tubulin, beta pol  | FSDH region gen    | NM_020040                               | NM_020040    |
| 3.26E+02 | 8.35E+00  | AE binding prote   | AE binding prote   | NM_001129                               | NM_001129    |
| 3.26E+02 | 8.35E+00  | AE binding prote   | AE binding prote   | NM_001129                               | NM_001129    |
| 2.60E+02 | 8.02E+00  | family with sequi  | family with sequi  | NM_174951                               | NM_174951    |
| 4.33E-03 | -7.85E+00 | hydroxypyruvate    | protein tyrosine   | NM_031207                               | NM_031207    |
| 4.33E-03 | -7.85E+00 | hydroxypyruvate    | protein tyrosine   | NM_031207                               | NM_031207    |
| 2.54E+02 | 7.99E+00  | golgin A8 family,  | p21-activated kir  | NR_027411                               | NR_027411    |
| 3.24E+02 | 8.34E+00  | luteinizing horm   | chorionic gonadc   | NM_000894                               | NM_000894    |
| 2.80E+02 | 8.13E+00  | potassium voltag   | potassium voltag   | NM_003636, NM_003636, NM_172130         |              |
| 2.80E+02 | 8.13E+00  | potassium voltag   | potassium voltag   | NM_003636, NM_003636, NM_172130         |              |
| 2.95E+02 | 8.21E+00  | tumor necrosis f   | tumor necrosis f:  | NM_003327                               | NM_003327    |
| 2.95E+02 | 8.21E+00  | tumor necrosis f   | tumor necrosis f:  | NM_003327                               | NM_003327    |
| 3.95E-03 | -7.98E+00 | high density lipo  | septin 2           | NM_203346, NM_203346, NM_005336         |              |
| 4.06E+02 | 8.66E+00  | chromosome 19      | polypyrimidine ti  | NM_173481                               | NM_173481    |
| 4.81E-03 | -7.70E+00 | zinc finger protei | HFM1, ATP-depe     | NM_016620, NM_016620, NM_032186, NM_201 |              |
| 1.66E+00 | 7.29E-01  | plexin B2          | plexin B2          | NM_012401                               | NM_012401    |
| 4.66E-03 | -7.75E+00 | signal recognitio  | Bcl2 modifying f:  | NM_003134                               | NM_003134    |
| 4.66E-03 | -7.75E+00 | signal recognitio  | Bcl2 modifying f:  | NM_003134                               | NM_003134    |
| 3.45E+02 | 8.43E+00  | ADP-ribosylation   | collagen, type XX  | NM_018209, NM_018209, NM_175609         |              |
| 3.45E+02 | 8.43E+00  | ADP-ribosylation   | collagen, type XX  | NM_018209, NM_018209, NM_175609         |              |
| 3.27E+02 | 8.35E+00  | immunoglobulin     | immunoglobulin     | NM_201526                               | NM_201526    |
| 2.47E+02 | 7.95E+00  | lipase maturatio   | lipase maturatio   | NM_022773                               | NM_022773    |
| 3.31E-03 | -8.24E+00 | prune homolog 2    | prune homolog 2    | NM_015225                               | NM_015225    |
| 3.31E-03 | -8.24E+00 | prune homolog 2    | prune homolog 2    | NM_015225                               | NM_015225    |
| 2.79E+02 | 8.12E+00  | asialoglycoprotei  | asialoglycoprotei  | NM_001671                               | NM_001671    |
| 2.68E+02 | 8.06E+00  | KIAA1671           | KIAA1671           | NM_001145206                            | NM_001145206 |
| 2.68E+02 | 8.06E+00  | KIAA1671           | KIAA1671           | NM_001145206                            | NM_001145206 |
| 2.11E+02 | 7.72E+00  | tudor domain co    | tropomodulin 1     | NM_014290                               | NM_014290    |
| 2.42E+02 | 7.92E+00  | small nucleolar R  | RAS-like, family 1 | NR_002575                               | NR_002575    |
| 3.30E+02 | 8.36E+00  | collagen, type IV, | collagen, type IV, | NM_001846                               | NM_001846    |

|          |           |                                                          |                        |                        |
|----------|-----------|----------------------------------------------------------|------------------------|------------------------|
| 2.90E+02 | 8.18E+00  | galanin receptor sal-like 3 (Drosophila)                 | NM_001480              | NM_001480              |
| 2.61E+02 | 8.03E+00  | SET and MYND domain transcription factor                 | NM_022743              | NM_022743              |
| 3.63E+02 | 8.50E+00  | zinc finger protein B-cell CLL/lymphoma 1                | NM_001080417           | NM_001080417           |
| 3.63E+02 | 8.50E+00  | zinc finger protein B-cell CLL/lymphoma 1                | NM_001080417           | NM_001080417           |
| 4.66E-03 | -7.75E+00 | melanocortin 3 receptor                                  | NM_019888              | NM_019888              |
| 3.78E+02 | 8.56E+00  | intraflagellar transport protein 17                      | NM_014714              | NM_014714              |
| 3.78E+02 | 8.56E+00  | transmembrane protein 246                                | NM_024600              | NM_024600              |
| 2.35E+02 | 7.88E+00  | notch 1                                                  | NM_017617              | NM_017617              |
| 2.35E+02 | 7.88E+00  | notch 1                                                  | NM_017617              | NM_017617              |
| 2.77E+02 | 8.11E+00  | hypothetical LOC100287069                                | NR_027069              | NR_027069              |
| 2.77E+02 | 8.11E+00  | hypothetical LOC100287069                                | NR_027069              | NR_027069              |
| 2.48E+02 | 7.95E+00  | breast cancer 1 mitogen-activated protein kinase         | NR_015445              | NR_015445              |
| 2.43E+02 | 7.92E+00  | glutamate receptor 7                                     | NR_027044              | NR_027044              |
| 2.74E+02 | 8.10E+00  | ferritin, heavy chain                                    | NM_002032              | NM_002032              |
| 3.43E-03 | -8.19E+00 | POM121 membrane transmembrane protein                    | NR_024592              | NR_024592              |
| 3.40E-03 | -8.20E+00 | Rho guanine nucleotide exchange factor 1                 | NM_003899              | NM_003899              |
| 2.56E+02 | 8.00E+00  | solute carrier family 11 member 1                        | NM_001003841           | NM_001003841           |
| 4.22E-03 | -7.89E+00 | lysine (K)-specific actin pseudogen 1                    | NM_006618              | NM_006618              |
| 2.92E+02 | 8.19E+00  | C1q and tumor necrosis factor receptor 1                 | NM_207419              | NM_207419              |
| 2.92E+02 | 8.19E+00  | C1q and tumor necrosis factor receptor 1                 | NM_207419              | NM_207419              |
| 3.27E+02 | 8.35E+00  | HGF activator docking protein 1                          | NM_001528              | NM_001528              |
| 3.27E+02 | 8.35E+00  | HGF activator docking protein 1                          | NM_001528              | NM_001528              |
| 3.80E+02 | 8.57E+00  | heat shock 70 kDa protein 1A                             | NM_025015              | NM_025015              |
| 4.74E-03 | -7.72E+00 | cancer/testis antigen thrombospondin 1                   | NM_001102658           | NM_001102658           |
| 4.74E-03 | -7.72E+00 | cancer/testis antigen thrombospondin 1                   | NM_001102658           | NM_001102658           |
| 2.37E+02 | 7.89E+00  | sema domain, transmembrane protein 108                   | NM_032108              | NM_032108              |
| 3.98E-03 | -7.97E+00 | transcription elongation factor 1                        | NM_174937              | NM_174937              |
| 3.98E-03 | -7.97E+00 | transcription elongation factor 1                        | NM_174937              | NM_174937              |
| 2.34E+02 | 7.87E+00  | antigen p97 (melanoma antigen p97)                       | NM_033316              | NM_033316              |
| 3.57E+02 | 8.48E+00  | macrophage erythrocyte membrane protein 1                | NM_005882,NM_001017405 | NM_005882,NM_001017405 |
| 3.40E+02 | 8.41E+00  | cleavage and polyadenylation factor 1                    | NM_013291              | NM_013291              |
| 4.40E-03 | -7.83E+00 | zinc finger protein 144                                  | NM_014480              | NM_014480              |
| 4.40E-03 | -7.83E+00 | zinc finger protein 144                                  | NM_014480              | NM_014480              |
| 4.62E-03 | -7.76E+00 | transmembrane protein 324                                | NM_032405              | NM_032405              |
| 3.90E+02 | 8.61E+00  | Rho GTPase activator laminin, alpha 1                    | NM_030672,NM_001010000 | NM_030672,NM_001010000 |
| 3.10E+02 | 8.28E+00  | small nuclear ribonucleoprotein A                        | NM_003097,NM_005678    | NM_003097,NM_005678    |
| 2.78E+02 | 8.12E+00  | NLR family, pyrin domain containing 3                    | NM_144687,NM_033297    | NM_144687,NM_033297    |
| 1.18E+00 | 2.40E-01  | coxsackievirus A2 POTE ankyrin domain 1                  | NR_024387              | NR_024387              |
| 1.18E+00 | 2.40E-01  | coxsackievirus A2 POTE ankyrin domain 1                  | NR_024387              | NR_024387              |
| 2.46E+02 | 7.94E+00  | transmembrane protein 1463                               | NM_001146336           | NM_001146336           |
| 2.61E+02 | 8.03E+00  | GDP-mannose 4-epimerase                                  | NM_001500              | NM_001500              |
| 2.30E+02 | 7.85E+00  | replication initiation factor 1                          | NM_014374              | NM_014374              |
| 2.30E+02 | 7.85E+00  | replication initiation factor 1                          | NM_014374              | NM_014374              |
| 2.77E+02 | 8.11E+00  | potassium voltage-gated channel subfamily B member 4     | NM_002234              | NM_002234              |
| 2.55E+02 | 8.00E+00  | carbohydrate (N-linked) glycosyltransferase 246          | NM_022467              | NM_022467              |
| 3.14E-03 | -8.32E+00 | piggyBac transposon choline O-acetyltransferase          | NM_170753              | NM_170753              |
| 2.57E+02 | 8.01E+00  | protein tyrosine phosphatase SH-PTPase                   | NM_002828              | NM_002828              |
| 3.33E+02 | 8.38E+00  | small VCP/p97-interacting leucine zipper protein         | NM_148893              | NM_148893              |
| 4.33E-03 | -7.85E+00 | sphingosine-1-phosphate lyase                            | NM_005226              | NM_005226              |
| 2.76E+02 | 8.11E+00  | RAB40B, member RAB40B, member                            | NM_006822              | NM_006822              |
| 2.76E+02 | 8.11E+00  | RAB40B, member RAB40B, member                            | NM_006822              | NM_006822              |
| 3.38E-03 | -8.21E+00 | spermatogenesis chromosome 15                            | NM_024063              | NM_024063              |
| 2.85E-03 | -8.46E+00 | RWD domain core ubiquitin specific                       | NM_016940              | NM_016940              |
| 2.18E+02 | 7.77E+00  | inhibitor of DNA kinase D-interactant 1                  | NM_002166              | NM_002166              |
| 2.18E+02 | 7.77E+00  | inhibitor of DNA kinase D-interactant 1                  | NM_002166              | NM_002166              |
| 3.79E-03 | -8.04E+00 | ST8 alpha-N-acetylglucosaminyltransferase                | NM_175052              | NM_175052              |
| 3.84E-03 | -8.03E+00 | nudix (nucleoside diphosphate-linked moiety X) motif 294 | NR_002949              | NR_002949              |
| 5.42E-03 | -7.53E+00 | solute carrier family 11 member 11                       | NM_152527              | NM_152527              |

|          |           |                     |                     |                                         |              |
|----------|-----------|---------------------|---------------------|-----------------------------------------|--------------|
| 2.10E+02 | 7.71E+00  | neuropilin (NRP)    | neuropilin (NRP)    | NM_018092                               | NM_018092    |
| 2.80E+02 | 8.13E+00  | adenylosuccinatε    | SIVA1, apoptosis    | NM_199165                               | NM_199165    |
| 2.80E+02 | 8.13E+00  | adenylosuccinatε    | SIVA1, apoptosis    | NM_199165                               | NM_199165    |
| 2.68E+02 | 8.06E+00  | neuroigin 4, Y-lir  | non-protein codi    | NM_014893                               | NM_014893    |
| 2.45E+02 | 7.94E+00  | UDP-GlcNAC:betε     | meteorin, glial cε  | NM_001009905                            | NM_001009905 |
| 2.45E+02 | 7.94E+00  | UDP-GlcNAC:betε     | meteorin, glial cε  | NM_001009905                            | NM_001009905 |
| 3.11E-03 | -8.33E+00 | sex comb on mid     | endothelin 2        | NM_012236                               | NM_012236    |
| 4.53E-03 | -7.78E+00 | phenylalanyl-tRN    | calreticulin        | NM_004461                               | NM_004461    |
| 4.53E-03 | -7.78E+00 | phenylalanyl-tRN    | calreticulin        | NM_004461                               | NM_004461    |
| 3.56E-03 | -8.14E+00 | doublesex and m     | doublesex and m     | NM_021951                               | NM_021951    |
| 3.56E-03 | -8.14E+00 | doublesex and m     | doublesex and m     | NM_021951                               | NM_021951    |
| 2.60E+02 | 8.02E+00  | strawberry notcl    | serine/threonine    | NM_001100122, NM_001100122, NM_014963   |              |
| 2.60E+02 | 8.02E+00  | strawberry notcl    | serine/threonine    | NM_001100122, NM_001100122, NM_014963   |              |
| 2.58E+02 | 8.01E+00  | Src-like-adaptor    | :Src-like-adaptor   | :NM_175077, NM_175077, NM_032214        |              |
| 3.95E-03 | -7.98E+00 | GSG1-like           | exportin 6          | NM_144675, NM_144675, NM_001109763      |              |
| 3.95E-03 | -7.98E+00 | GSG1-like           | exportin 6          | NM_144675, NM_144675, NM_001109763      |              |
| 4.40E-03 | -7.83E+00 | 6-phosphofructo     | APEX nuclease (α    | NM_002625                               | NM_002625    |
| 2.34E+02 | 7.87E+00  | ADAM metallope      | tubulin, gamma (    | NM_001109                               | NM_001109    |
| 4.61E-03 | -7.76E+00 | immunoglobulin-     | plakophilin 1 (eci  | NM_178275                               | NM_178275    |
| 4.59E-03 | -7.77E+00 | chromosome 6 o      | methylmalonyl C     | NM_001013732                            | NM_001013732 |
| 4.59E-03 | -7.77E+00 | chromosome 6 o      | methylmalonyl C     | NM_001013732                            | NM_001013732 |
| 4.35E-03 | -7.84E+00 | RAS-like, family    | 1general transcrip  | NM_206827                               | NM_206827    |
| 2.22E+02 | 7.79E+00  | olfactory receptc   | hypothetical LOC    | NM_001004698                            | NM_001004698 |
| 2.22E+02 | 7.79E+00  | olfactory receptc   | hypothetical LOC    | NM_001004698                            | NM_001004698 |
| 3.13E+02 | 8.29E+00  | aldehyde dehydr     | aldehyde dehydr     | NM_000694, NM_000694, NM_001030010      |              |
| 2.48E+02 | 7.95E+00  | polypyrimidine t    | polypyrimidine t    | NM_002819, NM_002819, NM_031990, NM_031 |              |
| 2.48E+02 | 7.95E+00  | polypyrimidine t    | polypyrimidine t    | NM_002819, NM_002819, NM_031990, NM_031 |              |
| 4.02E-03 | -7.96E+00 | myogenic factor     | myogenic factor     | NM_002469                               | NM_002469    |
| 2.68E+02 | 8.06E+00  | testis-specific tra | testis-specific tra | NR_001539                               | NR_001539    |
| 3.81E-03 | -8.04E+00 | enolase 1, (alpha   | carbonic anhydrε    | NM_001428                               | NM_001428    |
| 3.81E-03 | -8.04E+00 | enolase 1, (alpha   | carbonic anhydrε    | NM_001428                               | NM_001428    |
| 2.35E+02 | 7.88E+00  | CXXC finger 5       | pleckstrin and Se   | NM_016463                               | NM_016463    |
| 2.60E+02 | 8.02E+00  | mex-3 homolog I     | mex-3 homolog I     | NM_203304                               | NM_203304    |
| 4.29E-03 | -7.87E+00 | GRB2-related ad:    | GRB2-related ad:    | NM_006613                               | NM_006613    |
| 4.29E-03 | -7.87E+00 | GRB2-related ad:    | GRB2-related ad:    | NM_006613                               | NM_006613    |
| 3.09E+02 | 8.27E+00  | non-protein codi    | collagen, type XV   | NR_027498, NM_027498, NM_199175         |              |
| 3.09E+02 | 8.27E+00  | non-protein codi    | collagen, type XV   | NR_027498, NM_027498, NM_199175         |              |
| 3.09E+02 | 8.27E+00  | non-protein codi    | collagen, type XV   | NR_027498, NM_027498, NM_199175         |              |
| 2.83E+02 | 8.14E+00  | mitogen-activate    | plexin B2           | NM_002751                               | NM_002751    |
| 2.83E+02 | 8.14E+00  | plexin B2           | plexin B2           | NM_012401                               | NM_012401    |
| 4.59E-03 | -7.77E+00 | tumor protein Dε    | DnaJ (Hsp40) hor    | NM_199363, NM_199363, NM_199362, NM_199 |              |
| 2.99E+02 | 8.22E+00  | casein kinase 1, ξ  | casein kinase 1, ξ  | NM_001319                               | NM_001319    |
| 2.99E+02 | 8.22E+00  | casein kinase 1, ξ  | casein kinase 1, ξ  | NM_001319                               | NM_001319    |
| 2.91E+02 | 8.19E+00  | family with sequi   | family with sequi   | NM_205849                               | NM_205849    |
| 3.08E+02 | 8.27E+00  | snail homolog 3 (   | ring finger protei  | NM_178310                               | NM_178310    |
| 3.06E+02 | 8.26E+00  | bromodomain cc      | bromodomain cc      | NM_014577                               | NM_014577    |
| 4.16E-03 | -7.91E+00 | thyrotropin-releε   | asparagine-linkε    | NM_007117                               | NM_007117    |
| 4.16E-03 | -7.91E+00 | asparagine-linkε    | asparagine-linkε    | NM_001136152                            | NM_001136152 |
| 2.88E+02 | 8.17E+00  | solute carrier fan  | solute carrier fan  | NM_005629, NM_005629, NM_001142805      |              |
| 3.05E+02 | 8.25E+00  | mannosyl (alpha-    | mannosyl (alpha-    | NM_198955                               | NM_198955    |
| 3.05E+02 | 8.25E+00  | mannosyl (alpha-    | mannosyl (alpha-    | NM_198955                               | NM_198955    |
| 3.18E+02 | 8.31E+00  | myosin XVA          | myosin XVA          | NM_016239                               | NM_016239    |
| 3.18E+02 | 8.31E+00  | myosin XVA          | myosin XVA          | NM_016239                               | NM_016239    |
| 2.15E+02 | 7.75E+00  | zinc finger and B'  | zinc finger and B'  | NM_181842                               | NM_181842    |
| 2.15E+02 | 7.75E+00  | zinc finger and B'  | zinc finger and B'  | NM_181842                               | NM_181842    |
| 2.65E+02 | 8.05E+00  | zinc finger protei  | zinc finger protei  | NR_003952                               | NR_003952    |
| 2.07E+02 | 7.69E+00  | glutamate-rich 1    | discs, large (Dros  | NM_207332                               | NM_207332    |
| 4.38E-03 | -7.83E+00 | zinc finger protei  | glioma tumor su     | NM_001101419                            | NM_001101419 |

|          |           |                     |                     |                                             |                      |
|----------|-----------|---------------------|---------------------|---------------------------------------------|----------------------|
| 3.46E-03 | -8.17E+00 | family with sequ    | ankyrin repeat d    | NR_027422                                   | NR_027422            |
| 3.33E+02 | 8.38E+00  | transmembrane       | KIAA0125            | NM_025268                                   | NM_025268            |
| 3.64E-03 | -8.10E+00 | thiosulfate sulfur  | upstream transcr    | NM_001113205, NM_001113205, NM_001113206, N |                      |
| 2.94E+02 | 8.20E+00  | integrator compl    | integrator compl    | NR_027392                                   | NR_027392            |
| 2.44E+02 | 7.93E+00  | transmembrane       | KIAA0125            | NM_025268                                   | NM_025268            |
| 2.44E+02 | 7.93E+00  | transmembrane       | KIAA0125            | NM_025268                                   | NM_025268            |
| 3.99E-03 | -7.97E+00 | adaptor-related     | secretory carrier   | NM_003664                                   | NM_003664            |
| 3.99E-03 | -7.97E+00 | adaptor-related     | secretory carrier   | NM_003664                                   | NM_003664            |
| 3.15E-03 | -8.31E+00 | solute carrier fan  | centrosomal pro     | NM_003038                                   | NM_003038            |
| 3.15E-03 | -8.31E+00 | solute carrier fan  | centrosomal pro     | NM_003038                                   | NM_003038            |
| 3.06E+02 | 8.26E+00  | paired-like home    | paired-like home    | NM_153426, NM_153426, NM_153427, NM_00C     |                      |
| 3.06E+02 | 8.26E+00  | paired-like home    | paired-like home    | NM_153426, NM_153426, NM_153427, NM_00C     |                      |
| 3.06E+02 | 8.26E+00  | paired-like home    | paired-like home    | NM_153426, NM_153426, NM_153427, NM_00C     |                      |
| 3.06E+02 | 8.26E+00  | aquaporin 12B       | aquaporin 12A       | NM_001102467                                | NM_001102467         |
| 2.10E+02 | 7.72E+00  | G protein-couple    | G protein-couple    | NM_001083909                                | NM_001083909         |
| 2.82E+02 | 8.14E+00  | signal-induced pr   | signal-induced pr   | NM_153253                                   | NM_153253            |
| 4.59E-03 | -7.77E+00 | N-acylsphingosin    | N-acetyltransfer:   | NM_001127505, NM_001127505, NM_004315, NM_  |                      |
| 3.73E-03 | -8.07E+00 | LIM and senesce     | LIM and senesce     | NM_033514                                   | NM_033514            |
| 4.01E+02 | 8.65E+00  | protein phosphat    | protein phosphat    | NM_013239, NM_013239, NM_199326             |                      |
| 3.14E+02 | 8.30E+00  | BTB (POZ) domai     | BTB (POZ) domai     | NM_032444                                   | NM_032444            |
| 3.46E+02 | 8.43E+00  | similar to hCG19    | similar to hCG19    | NR_026913                                   | NR_026913            |
| 2.16E+02 | 7.76E+00  | dihydrouridine s    | neurturin           | NM_020175                                   | NM_020175            |
| 2.98E+02 | 8.22E+00  | glutamate recept    | glutamate recept    | NM_138690                                   | NM_138690            |
| 2.91E+02 | 8.19E+00  | hect domain and     | makorin ring fing   | NR_002824                                   | NR_002824            |
| 2.50E+02 | 7.96E+00  | testis-specific tra | testis-specific tra | NR_003593, NR_001540                        | NR_003593, NR_001540 |
| 2.50E+02 | 7.96E+00  | testis-specific tra | testis-specific tra | NR_003593, NR_001540                        | NR_003593, NR_001540 |
| 5.00E-03 | -7.64E+00 | chromosome 13       | SRY (sex determi    | NM_152324                                   | NM_152324            |
| 5.00E-03 | -7.64E+00 | chromosome 13       | SRY (sex determi    | NM_152324                                   | NM_152324            |
| 2.22E+02 | 7.79E+00  | fasciculation and   | vitrin              | NM_001042548, NM_001042548, NM_005102       |                      |
| 2.22E+02 | 7.79E+00  | fasciculation and   | vitrin              | NM_001042548, NM_001042548, NM_005102       |                      |
| 4.07E+02 | 8.67E+00  | null                | POTE ankyrin do     | null                                        | null                 |
| 2.15E+02 | 7.75E+00  | lipid phosphate     | lipid phosphate     | NM_024888                                   | NM_024888            |
| 2.61E+02 | 8.03E+00  | MCF.2 cell line d   | MCF.2 cell line d   | NM_024979                                   | NM_024979            |
| 2.96E+02 | 8.21E+00  | transcription fact  | transcription fact  | NM_014972                                   | NM_014972            |
| 3.28E+02 | 8.36E+00  | ADAMTS-like 5       | polo-like kinase    | NM_213604                                   | NM_213604            |
| 2.82E+02 | 8.14E+00  | NK2 homeobox 1      | NK2 homeobox 1      | NM_003317, NM_003317, NM_001079668          |                      |
| 2.82E+02 | 8.14E+00  | NK2 homeobox 1      | NK2 homeobox 1      | NM_003317, NM_003317, NM_001079668          |                      |
| 3.50E+02 | 8.45E+00  | proprotein conv     | proprotein conv     | NM_017573                                   | NM_017573            |
| 2.08E+02 | 7.70E+00  | matrix metallope    | matrix metallope    | NM_147191                                   | NM_147191            |
| 4.57E-03 | -7.77E+00 | pleckstrin homol    | leucine rich repe   | NM_014798                                   | NM_014798            |
| 3.27E+02 | 8.35E+00  | tetratricopeptide   | tetratricopeptide   | NM_016030                                   | NM_016030            |
| 3.27E+02 | 8.35E+00  | tetratricopeptide   | tetratricopeptide   | NM_016030                                   | NM_016030            |
| 2.25E+02 | 7.81E+00  | Zic family mem      | propionyl CoA ca    | NM_007129                                   | NM_007129            |
| 2.72E+02 | 8.09E+00  | olfactory receptc   | folate hydrolase    | NM_001005512                                | NM_001005512         |
| 2.72E+02 | 8.09E+00  | olfactory receptc   | folate hydrolase    | NM_001005512                                | NM_001005512         |
| 4.30E-03 | -7.86E+00 | phospholipid tra    | PDX1 C-terminal     | NM_182676, NM_182676, NM_006227             |                      |
| 2.74E+02 | 8.10E+00  | thimet oligopept    | thimet oligopept    | NM_003249                                   | NM_003249            |
| 3.40E-03 | -8.20E+00 | RUN and FYVE d      | chemokine (C-X-     | NM_198483                                   | NM_198483            |
| 3.40E-03 | -8.20E+00 | chemokine (C-X-     | chemokine (C-X-     | NM_001557                                   | NM_001557            |
| 3.25E-03 | -8.27E+00 | BCL6 corepresso     | BCL6 corepresso     | NM_001123383, NM_001123383, NM_001123384, N |                      |
| 3.25E-03 | -8.27E+00 | BCL6 corepresso     | BCL6 corepresso     | NM_001123383, NM_001123383, NM_001123384, N |                      |
| 5.15E-03 | -7.60E+00 | leucine-rich repe   | leucine-rich repe   | NM_015613                                   | NM_015613            |
| 2.42E+02 | 7.92E+00  | down-regulator      | formin binding p    | NM_001938                                   | NM_001938            |
| 3.19E+02 | 8.32E+00  | olfactory receptc   | olfactory receptc   | NM_001005484                                | NM_001005484         |
| 3.19E+02 | 8.32E+00  | olfactory receptc   | olfactory receptc   | NM_001005484                                | NM_001005484         |
| 3.19E+02 | 8.32E+00  | olfactory receptc   | olfactory receptc   | NM_001005484                                | NM_001005484         |
| 3.38E-03 | -8.21E+00 | neurotrimin         | neurotrimin         | NM_001048209                                | NM_001048209         |
| 3.38E-03 | -8.21E+00 | neurotrimin         | neurotrimin         | NM_001048209                                | NM_001048209         |

|          |           |                                         |                                           |                                            |              |
|----------|-----------|-----------------------------------------|-------------------------------------------|--------------------------------------------|--------------|
| 2.82E+02 | 8.14E+00  | solute carrier fan                      | solute carrier fan                        | NM_006598                                  | NM_006598    |
| 2.82E+02 | 8.14E+00  | solute carrier fan                      | solute carrier fan                        | NM_006598                                  | NM_006598    |
| 3.48E-03 | -8.17E+00 | proenkephalin                           | inositol monophosphatase                  | NM_001135690, NM_001135690, NM_006211      |              |
| 3.48E-03 | -8.17E+00 | proenkephalin                           | inositol monophosphatase                  | NM_001135690, NM_001135690, NM_006211      |              |
| 4.13E-03 | -7.92E+00 | N-myristoyltransferase                  | N-myristoyltransferase                    | NM_021079                                  | NM_021079    |
| 2.46E+02 | 7.94E+00  | Rho-related BTBD1                       | Rho-related BTBD1                         | NR_024555, NR_024555, NR_024554, NR_024555 |              |
| 2.99E+02 | 8.22E+00  | uroplakin 1A                            | zinc finger and BTBD1                     | NM_007000                                  | NM_007000    |
| 4.03E-03 | -7.95E+00 | hCG1645220                              | dynein, cytoplasmic 1                     | NM_001101330                               | NM_001101330 |
| 4.03E-03 | -7.95E+00 | hCG1645220                              | dynein, cytoplasmic 1                     | NM_001101330                               | NM_001101330 |
| 3.11E+02 | 8.28E+00  | ventral anterior 1                      | potassium channel subunit 1               | NM_001112704                               | NM_001112704 |
| 3.43E+02 | 8.42E+00  | CTD (carboxy-terminal domain)           | potassium voltage-gated channel subunit 1 | NM_048368, NM_048368, NM_004715            |              |
| 3.86E-03 | -8.02E+00 | tripartite motif-c                      | tripartite motif-c                        | NM_172016                                  | NM_172016    |
| 3.06E+02 | 8.26E+00  | vesicle-associate protein 1             | period homolog                            | NM_004781                                  | NM_004781    |
| 3.20E+02 | 8.32E+00  | transcription factor 1                  | transcription factor 1                    | NM_001136139, NM_001136139, NM_003200      |              |
| 2.97E+02 | 8.22E+00  | wingless-type metalloprotease 1         | wingless-type metalloprotease 1           | NM_003392                                  | NM_003392    |
| 4.64E-03 | -7.75E+00 | zinc finger and BTBD1                   | heat shock 70 kDa protein 1               | NM_001123329, NM_001123329, NM_014950      |              |
| 3.23E+02 | 8.33E+00  | egl nine homolog 1                      | egl nine homolog 1                        | NM_053046                                  | NM_053046    |
| 2.88E+02 | 8.17E+00  | drebrin 1                               | drebrin 1                                 | NM_004395, NM_004395, NM_080881            |              |
| 2.88E+02 | 8.17E+00  | drebrin 1                               | drebrin 1                                 | NM_004395, NM_004395, NM_080881            |              |
| 2.59E+02 | 8.02E+00  | patatin-like phosphatase 1              | patatin-like phosphatase 1                | NM_020376                                  | NM_020376    |
| 2.59E+02 | 8.02E+00  | patatin-like phosphatase 1              | patatin-like phosphatase 1                | NM_020376                                  | NM_020376    |
| 2.39E+02 | 7.90E+00  | potassium inward rectifier subunit 1    | potassium inward rectifier subunit 1      | NM_152868, NM_152868, NM_004981            |              |
| 3.44E-03 | -8.18E+00 | macrophage expansion 1                  | macrophage expansion 1                    | NM_001039396                               | NM_001039396 |
| 2.60E+02 | 8.02E+00  | transcription factor 1                  | transcription factor 1                    | NM_001136139, NM_001136139, NM_003200      |              |
| 2.25E+02 | 7.81E+00  | multimerin 2                            | multimerin 2                              | NM_024756                                  | NM_024756    |
| 4.37E-03 | -7.84E+00 | KTEL (Lys-Tyr-Glu)                      | chromosome 3 open reading frame 1         | NR_024265, NR_024265, NM_152305            |              |
| 2.33E+02 | 7.87E+00  | splA/ryanodine receptor 1               | splA/ryanodine receptor 1                 | NM_080861                                  | NM_080861    |
| 3.79E-03 | -8.04E+00 | heterogeneous nuclear annexin A8        |                                           | NR_003277                                  | NR_003277    |
| 3.26E+02 | 8.35E+00  | vitrin                                  | vitrin                                    | NM_053276                                  | NM_053276    |
| 2.87E+02 | 8.16E+00  | lipase maturation 1                     | lipase maturation 1                       | NM_033200                                  | NM_033200    |
| 2.62E+02 | 8.03E+00  | complement component 5                  | EPH receptor B2                           | NM_000491                                  | NM_000491    |
| 2.62E+02 | 8.03E+00  | complement component 5                  | EPH receptor B2                           | NM_000491                                  | NM_000491    |
| 2.62E+02 | 8.03E+00  | complement component 5                  | EPH receptor B2                           | NM_000491                                  | NM_000491    |
| 2.90E+02 | 8.18E+00  | toll interacting protein 1              | toll interacting protein 1                | NM_019009                                  | NM_019009    |
| 2.32E+02 | 7.86E+00  | transmembrane protein 1                 | transmembrane protein 1                   | NM_017814                                  | NM_017814    |
| 2.32E+02 | 7.86E+00  | transmembrane protein 1                 | transmembrane protein 1                   | NM_017814                                  | NM_017814    |
| 2.48E+02 | 7.95E+00  | L antigen family, ubiquitin-like 4A     |                                           | NM_006014                                  | NM_006014    |
| 3.67E+02 | 8.52E+00  | tissue specific transmembrane protein 1 | tissue specific transmembrane protein 1   | NM_003313                                  | NM_003313    |
| 2.58E+02 | 8.01E+00  | inhibitor of CDK 1                      | inhibitor of CDK 1                        | NM_213726                                  | NM_213726    |
| 2.47E+02 | 7.95E+00  | heparan sulfate proteoglycan 1          | placenta-specific protein 1               | NM_004807                                  | NM_004807    |
| 2.47E+02 | 7.95E+00  | heparan sulfate proteoglycan 1          | placenta-specific protein 1               | NM_004807                                  | NM_004807    |
| 2.56E+02 | 8.00E+00  | ankyrin repeat domain 1                 | ankyrin repeat domain 1                   | NM_152345                                  | NM_152345    |
| 2.82E+02 | 8.14E+00  | ras-related C3 beta cytohesin 4         |                                           | NM_002872                                  | NM_002872    |
| 2.82E+02 | 8.14E+00  | ras-related C3 beta cytohesin 4         |                                           | NM_002872                                  | NM_002872    |
| 3.73E+02 | 8.54E+00  | solute carrier fan                      | ASMTL antisense                           | NM_001636                                  | NM_001636    |
| 4.32E-03 | -7.86E+00 | gap junction protein topoisomerase 1    |                                           | NM_152219                                  | NM_152219    |
| 2.43E+02 | 7.92E+00  | interferon inducible protein 1          | interferon inducible protein 1            | NM_001025295                               | NM_001025295 |
| 3.98E-03 | -7.97E+00 | ---                                     | surfactant protein 1                      | NM_006926                                  | NM_006926    |
| 4.66E-03 | -7.75E+00 | defensin, beta 1                        | seven transmembrane protein 1             | NM_001040448                               | NM_001040448 |
| 5.25E-03 | -7.57E+00 | mediator complex 1                      | mediator complex 1                        | NM_153450                                  | NM_153450    |
| 2.38E+02 | 7.90E+00  | protein tyrosine phosphatase 1          | protein tyrosine phosphatase 1            | NM_080392, NM_080392, NM_080391            |              |
| 3.15E+02 | 8.30E+00  | galactosamine 6-epimerase               |                                           | NM_000512                                  | NM_000512    |
| 3.15E+02 | 8.30E+00  | galactosamine 6-epimerase               |                                           | NM_000512                                  | NM_000512    |
| 3.11E+02 | 8.28E+00  | glutamate receptor 1                    | glutamate receptor 1                      | NM_138690                                  | NM_138690    |
| 3.72E+02 | 8.54E+00  | copine VII                              | copine VII                                | NM_014427, NM_014427, NM_153636            |              |
| 3.72E+02 | 8.54E+00  | copine VII                              | copine VII                                | NM_014427, NM_014427, NM_153636            |              |
| 3.72E+02 | 8.54E+00  | copine VII                              | copine VII                                | NM_014427, NM_014427, NM_153636            |              |
| 3.72E+02 | 8.54E+00  | copine VII                              | copine VII                                | NM_014427, NM_014427, NM_153636            |              |

|          |           |                                   |                                   |               |                                     |           |
|----------|-----------|-----------------------------------|-----------------------------------|---------------|-------------------------------------|-----------|
| 2.66E+02 | 8.05E+00  | Rho guanine nuc                   | Rho guanine nuc                   | NM_014629     | NM_014629                           |           |
| 2.54E+02 | 7.99E+00  | chromosome 19                     | chromosome 19                     | NM_001033026, | NM_001033026,NM_033420              |           |
| 3.15E+02 | 8.30E+00  | wntless homolog                   | wntless homolog                   | NM_024911     | NM_024911                           |           |
| 2.34E+02 | 7.87E+00  | armadillo repeat                  | armadillo repeat                  | NM_024742,NM  | NM_024742,NM_001105247              |           |
| 2.34E+02 | 7.87E+00  | armadillo repeat                  | armadillo repeat                  | NM_024742,NM  | NM_024742,NM_001105247              |           |
| 4.96E-03 | -7.66E+00 | defensin, beta 1C                 | defensin, beta 1C                 | NM_001040704, | NM_001040704,NM_152251              |           |
| 4.96E-03 | -7.66E+00 | defensin, beta 1C                 | defensin, beta 1C                 | NM_001040704, | NM_001040704,NM_152251              |           |
| 2.05E+02 | 7.68E+00  | LON peptidase N                   | LON peptidase N                   | NM_152271     | NM_152271                           |           |
| 2.05E+02 | 7.68E+00  | LON peptidase N                   | LON peptidase N                   | NM_152271     | NM_152271                           |           |
| 2.62E+02 | 8.03E+00  | nuclear factor I/c                | nuclear factor I/c                | NM_005597     | NM_005597                           |           |
| 2.62E+02 | 8.03E+00  | nuclear factor I/c                | nuclear factor I/c                | NM_005597     | NM_005597                           |           |
| 3.81E+02 | 8.57E+00  | protein phosphatase               | protein phosphatase               | NM_013239,NM  | NM_013239,NM_199326                 |           |
| 4.52E-03 | -7.79E+00 | retinoschisin 1                   | protein phosphatase               | NM_000330     | NM_000330                           |           |
| 4.52E-03 | -7.79E+00 | retinoschisin 1                   | protein phosphatase               | NM_000330     | NM_000330                           |           |
| 2.13E+02 | 7.74E+00  | eukaryotic transl                 | eukaryotic transl                 | NM_019843     | NM_019843                           |           |
| 1.49E+00 | 5.78E-01  | solute carrier fan                | solute carrier fan                | NM_001110781  | NM_001110781                        |           |
| 1.49E+00 | 5.78E-01  | solute carrier fan                | solute carrier fan                | NM_001110781  | NM_001110781                        |           |
| 2.85E+02 | 8.15E+00  | LY6/PLAUR domain                  | LY6/PLAUR domain                  | NM_205545     | NM_205545                           |           |
| 4.11E+02 | 8.68E+00  | protein phosphatase               | protein phosphatase               | NM_013239,NM  | NM_013239,NM_199326                 |           |
| 3.15E+02 | 8.30E+00  | PDZ and LIM domain                | PDZ and LIM domain                | NM_176871,NM  | NM_176871,NM_198042                 |           |
| 2.40E+02 | 7.91E+00  | programmed cell mitochondrial rib | programmed cell mitochondrial rib | NR_003713     | NR_003713                           |           |
| 2.40E+02 | 7.91E+00  | programmed cell mitochondrial rib | programmed cell mitochondrial rib | NR_003713     | NR_003713                           |           |
| 2.55E+02 | 8.00E+00  | chromosome 8 o                    | glutamate-rich 1                  | NM_175075     | NM_175075                           |           |
| 2.93E+02 | 8.20E+00  | solute carrier fan                | solute carrier fan                | NM_004174     | NM_004174                           |           |
| 2.93E+02 | 8.20E+00  | solute carrier fan                | solute carrier fan                | NM_004174     | NM_004174                           |           |
| 3.27E-03 | -8.26E+00 | chromosome 1 o                    | chromosome 1 o                    | NM_153035     | NM_153035                           |           |
| 3.27E-03 | -8.26E+00 | chromosome 1 o                    | chromosome 1 o                    | NM_153035     | NM_153035                           |           |
| 4.43E+02 | 8.79E+00  | hypothetical LOC                  | hypothetical LOC                  | NR_024492     | NR_024492                           |           |
| 2.18E+02 | 7.77E+00  | serpin peptidase                  | synaptosomal-as                   | NM_000185     | NM_000185                           |           |
| 5.13E-03 | -7.61E+00 | crystallin, gamma                 | crystallin, gamma                 | NM_005210     | NM_005210                           |           |
| 5.13E-03 | -7.61E+00 | crystallin, gamma                 | crystallin, gamma                 | NM_005210     | NM_005210                           |           |
| 3.66E-03 | -8.10E+00 | RAB37, member                     | solute carrier fan                | NM_001006638  | NM_001006638                        |           |
| 3.31E-03 | -8.24E+00 | collagen, type IX,                | collagen, type IX,                | NM_001851,NM  | NM_001851,NM_078485                 |           |
| 3.09E+02 | 8.27E+00  | paired-like home                  | H2A histone fam                   | NM_002653     | NM_002653                           |           |
| 2.23E+02 | 7.80E+00  | coiled-coil domain                | coiled-coil domain                | NM_015603     | NM_015603                           |           |
| 3.40E+02 | 8.41E+00  | Kruppel-like factor               | Kruppel-like factor               | NM_173484     | NM_173484                           |           |
| 2.84E+02 | 8.15E+00  | DIO3 opposite st                  | deiodinase, iodo                  | NR_002770     | NR_002770                           |           |
| 2.84E+02 | 8.15E+00  | DIO3 opposite st                  | deiodinase, iodo                  | NR_002770     | NR_002770                           |           |
| 2.68E+02 | 8.06E+00  | ---                               | ---                               | NM_001080422  | NM_001080422                        |           |
| 3.27E+02 | 8.35E+00  | glutamate receptor                | glutamate receptor                | NM_001145118  | NM_001145118                        |           |
| 3.27E+02 | 8.35E+00  | glutamate receptor                | glutamate receptor                | NM_001145118  | NM_001145118                        |           |
| 2.93E+02 | 8.20E+00  | PR domain conta                   | PR domain conta                   | NM_020226     | NM_020226                           |           |
| 2.93E+02 | 8.20E+00  | PR domain conta                   | PR domain conta                   | NM_020226     | NM_020226                           |           |
| 2.93E+02 | 8.20E+00  | PR domain conta                   | PR domain conta                   | NM_020226     | NM_020226                           |           |
| 2.78E+02 | 8.12E+00  | dysbindin (dysreg                 | growth arrest-sp                  | NM_024043,NM  | NM_024043,NM_001042610              |           |
| 2.78E+02 | 8.12E+00  | dysbindin (dysreg                 | growth arrest-sp                  | NM_024043,NM  | NM_024043,NM_001042610              |           |
| 3.30E+02 | 8.36E+00  | exonuclease 3'-5                  | exonuclease 3'-5                  | NM_017820     | NM_017820                           |           |
| 3.30E+02 | 8.36E+00  | exonuclease 3'-5                  | exonuclease 3'-5                  | NM_017820     | NM_017820                           |           |
| 3.38E+02 | 8.40E+00  | odorant binding                   | ABO blood group                   | NM_014581     | NM_014581                           |           |
| 3.97E-03 | -7.98E+00 | NADH dehydrogenase                | NADH dehydrogenase                | NM_004550     | NM_004550                           |           |
| 3.98E-03 | -7.97E+00 | cyclin-dependent                  | spindlin 1                        | NM_001039803, | NM_001039803,NM_178432,NM_178432    |           |
| 2.89E+02 | 8.17E+00  | mucin 16, cell surface            | olfactory receptor                | NM_024690     | NM_024690                           |           |
| 2.36E+02 | 7.88E+00  | BR serine/threonine               | kinase                            | NM_003957     | NM_003957                           |           |
| 4.37E-03 | -7.84E+00 | cathepsin L1                      | cathepsin L family                | NM_145918,NM  | NM_145918,NM_001912                 |           |
| 3.79E+02 | 8.57E+00  | immediate early                   | calcium channel,                  | NM_016545     | NM_016545                           |           |
| 3.33E-03 | -8.23E+00 | H2A histone family                | chromosome 5 o                    | NM_004893,NM  | NM_004893,NM_001040158,NM_001040158 |           |
| 4.11E-03 | -7.93E+00 | desmin                            | SPEG complex                      | locus         | NM_001927                           | NM_001927 |
| 2.67E+02 | 8.06E+00  | histone deacetylase               | phosphorylase kinase              | NM_018486     | NM_018486                           |           |



|          |           |                                         |                                      |              |
|----------|-----------|-----------------------------------------|--------------------------------------|--------------|
| 2.67E+02 | 8.06E+00  | histone deacetyl; phosphorylase ki      | NM_018486                            | NM_018486    |
| 2.85E+02 | 8.15E+00  | slingshot homolc D-amino-acid oxi       | NM_018984                            | NM_018984    |
| 2.85E+02 | 8.15E+00  | D-amino-acid oxi D-amino-acid oxi       | NM_001917                            | NM_001917    |
| 2.13E+02 | 7.74E+00  | mucin 4, cell surf mucin 4, cell surf   | NM_138297,NM_138297,NM_004532,NM_018 |              |
| 2.13E+02 | 7.74E+00  | mucin 4, cell surf mucin 4, cell surf   | NM_138297,NM_138297,NM_004532,NM_018 |              |
| 2.51E+02 | 7.97E+00  | small G protein s small G protein s     | NM_001098509                         | NM_001098509 |
| 2.97E+02 | 8.22E+00  | solute carrier fan solute carrier fan   | NM_004174                            | NM_004174    |
| 3.13E+02 | 8.29E+00  | voltage-depende solute carrier fan      | NM_005662,NM_005662,NM_001135694     |              |
| 2.44E+02 | 7.93E+00  | Rho GTPase activ Rho GTPase activ       | NM_001159330, NM_001159330,NM_199282 |              |
| 2.44E+02 | 7.93E+00  | Rho GTPase activ Rho GTPase activ       | NM_001159330, NM_001159330,NM_199282 |              |
| 2.63E+02 | 8.04E+00  | family with sequ ubiquitin-conjug;      | NM_001014980                         | NM_001014980 |
| 2.74E+02 | 8.10E+00  | arginyl-tRNA syn fibrillar-like 1       | NM_002887                            | NM_002887    |
| 3.71E-03 | -8.07E+00 | topoisomerase (I chromosome 8 o         | NM_052963                            | NM_052963    |
| 3.59E+02 | 8.49E+00  | nuclear factor of nuclear factor of     | NM_172387,NM_172387,NM_172389        |              |
| 2.68E+02 | 8.06E+00  | CTD (carboxy-ter potassium voltag       | NM_048368,NM_048368,NM_004715        |              |
| 2.68E+02 | 8.06E+00  | CTD (carboxy-ter potassium voltag       | NM_048368,NM_048368,NM_004715        |              |
| 2.90E+02 | 8.18E+00  | jumonji domain (jumonji domain (        | NM_023007                            | NM_023007    |
| 2.90E+02 | 8.18E+00  | jumonji domain (jumonji domain (        | NM_023007                            | NM_023007    |
| 2.28E+02 | 7.83E+00  | hypothetical LOC tetraspanin 31         | NR_027032                            | NR_027032    |
| 2.28E+02 | 7.83E+00  | hypothetical LOC tetraspanin 31         | NR_027032                            | NR_027032    |
| 4.30E-03 | -7.86E+00 | small nucleolar R chromosome 8 o        | NR_002581                            | NR_002581    |
| 3.29E-03 | -8.25E+00 | Meis homeobox adenosine A2b re          | NR_002211                            | NR_002211    |
| 3.49E+02 | 8.45E+00  | hypothetical LOC chromosome 9 o         | NR_024369                            | NR_024369    |
| 5.37E-03 | -7.54E+00 | Down syndrome chromosome 21             | NM_001389                            | NM_001389    |
| 2.49E+02 | 7.96E+00  | Rho GDP dissoci Rho GDP dissoci         | NM_001176                            | NM_001176    |
| 2.46E+02 | 7.94E+00  | calcium homeost calcium homeost         | NM_006387                            | NM_006387    |
| 2.46E+02 | 7.94E+00  | calcium homeost calcium homeost         | NM_006387                            | NM_006387    |
| 3.54E+02 | 8.47E+00  | lysine (K)-specific lysine (K)-specific | NM_001080424                         | NM_001080424 |
| 2.19E+02 | 7.78E+00  | hect domain and TP53 target 3B          | NR_002827                            | NR_002827    |
| 2.19E+02 | 7.78E+00  | hect domain and TP53 target 3B          | NR_002827                            | NR_002827    |
| 2.65E+02 | 8.05E+00  | ELAV (embryonic ELAV (embryonic         | NM_032281,NM_032281,NM_001420        |              |
| 2.65E+02 | 8.05E+00  | ELAV (embryonic ELAV (embryonic         | NM_032281,NM_032281,NM_001420        |              |
| 3.09E+02 | 8.27E+00  | recombination si recombination si       | NM_014276                            | NM_014276    |
| 3.09E+02 | 8.27E+00  | recombination si recombination si       | NM_014276                            | NM_014276    |
| 3.09E+02 | 8.27E+00  | recombination si recombination si       | NM_014276                            | NM_014276    |
| 2.88E+02 | 8.17E+00  | spleen focus forr solute carrier fan    | NM_001080547, NM_001080547,NM_003120 |              |
| 2.88E+02 | 8.17E+00  | spleen focus forr solute carrier fan    | NM_001080547, NM_001080547,NM_003120 |              |
| 2.69E+02 | 8.07E+00  | hypothetical LOC fibrosin-like 1        | NR_024563                            | NR_024563    |
| 2.69E+02 | 8.07E+00  | hypothetical LOC fibrosin-like 1        | NR_024563                            | NR_024563    |
| 4.15E+02 | 8.70E+00  | histone deacetyl; histone deacetyl;     | NM_032019,NM_032019,NM_001159286     |              |
| 4.15E+02 | 8.70E+00  | histone deacetyl; histone deacetyl;     | NM_032019,NM_032019,NM_001159286     |              |
| 4.15E+02 | 8.70E+00  | histone deacetyl; histone deacetyl;     | NM_032019,NM_032019,NM_001159286     |              |
| 2.77E+02 | 8.11E+00  | EH-domain cont; EH-domain cont;         | NM_014601                            | NM_014601    |
| 2.46E+02 | 7.94E+00  | ERBB receptor fe solute carrier fan     | NM_018948                            | NM_018948    |
| 2.39E+02 | 7.90E+00  | zinc finger protei zinc finger protei   | NM_016423,NM_016423,NM_001101672,NM_ |              |
| 2.39E+02 | 7.90E+00  | zinc finger protei zinc finger protei   | NM_016423,NM_016423,NM_001101672,NM_ |              |
| 2.39E+02 | 7.90E+00  | zinc finger protei zinc finger protei   | NM_016423,NM_016423,NM_001101672,NM_ |              |
| 3.57E+02 | 8.48E+00  | autism susceptib autism susceptib       | NM_015570,NM_015570,NM_001127232     |              |
| 3.57E+02 | 8.48E+00  | autism susceptib autism susceptib       | NM_015570,NM_015570,NM_001127232     |              |
| 2.76E+02 | 8.11E+00  | sarcosine dehydr sarcosine dehydr       | NM_007101,NM_007101,NM_001134707     |              |
| 3.26E+02 | 8.35E+00  | HECT, C2 and W coiled-coil doma         | NM_020760                            | NM_020760    |
| 3.18E-03 | -8.30E+00 | angiopoietin 1 R-spondin 2 hom          | NM_001146                            | NM_001146    |
| 4.40E-03 | -7.83E+00 | zinc finger protei zinc finger protei   | NM_001082480                         | NM_001082480 |
| 4.40E-03 | -7.83E+00 | zinc finger protei zinc finger protei   | NM_014789                            | NM_014789    |
| 3.21E-03 | -8.29E+00 | protein tyrosine interferon, beta :     | NM_001010915                         | NM_001010915 |
| 3.22E+02 | 8.33E+00  | chromosome 14 delta-like 1 hom;         | NR_024096                            | NR_024096    |
| 3.22E+02 | 8.33E+00  | chromosome 14 delta-like 1 hom;         | NR_024096                            | NR_024096    |
| 4.52E-03 | -7.79E+00 | cholinergic recep ADAM metallope        | NM_000750                            | NM_000750    |

|          |           |                                       |               |                            |
|----------|-----------|---------------------------------------|---------------|----------------------------|
| 3.04E-03 | -8.36E+00 | glial cell derived EGF-like, fibrone  | NM_000514,NM  | NM_000514,NM_199231,NM_199 |
| 3.04E-03 | -8.36E+00 | glial cell derived EGF-like, fibrone  | NM_000514,NM  | NM_000514,NM_199231,NM_199 |
| 4.03E-03 | -7.95E+00 | calcineurin-like pshisa homolog 9     | NM_018340,NM  | NM_018340,NM_001099455     |
| 2.42E+02 | 7.92E+00  | protease, serine, protease, serine,   | NM_001135086  | NM_001135086               |
| 2.42E+02 | 7.92E+00  | protease, serine, protease, serine,   | NM_006799,NM  | NM_006799,NM_144956,NM_144 |
| 2.56E+02 | 8.00E+00  | jumonji, AT rich i jumonji, AT rich i | NM_004973     | NM_004973                  |
| 3.76E-03 | -8.05E+00 | placenta-specific family with sequ    | NM_182832     | NM_182832                  |
| 3.79E-03 | -8.04E+00 | nucleoredoxin translocase of ini      | NM_022463     | NM_022463                  |
| 3.42E+02 | 8.42E+00  | phospholipase D folliculin            | NM_178836     | NM_178836                  |
| 3.35E+02 | 8.39E+00  | coronin, actin bir coronin, actin bir | NM_052820,NM  | NM_052820,NM_003389        |
| 2.77E+02 | 8.11E+00  | chromosome 20 chromosome 20           | NM_178463     | NM_178463                  |
| 3.94E-03 | -7.99E+00 | serine peptidase F-box and WD re      | NM_001080525  | NM_001080525               |
| 3.21E+02 | 8.33E+00  | RER1 retention ir RER1 retention ir   | NM_007033     | NM_007033                  |
| 3.21E+02 | 8.33E+00  | RER1 retention ir RER1 retention ir   | NM_007033     | NM_007033                  |
| 2.65E+02 | 8.05E+00  | phosphohistidine MAM domain co        | NM_014172,NM  | NM_014172,NM_001135861     |
| 2.75E+02 | 8.10E+00  | potassium voltag potassium voltag     | NM_004700,NM  | NM_004700,NM_172163        |
| 4.27E-03 | -7.87E+00 | splicing factor 3a splicing factor 3a | NM_001005409, | NM_001005409,NM_005877     |
| 2.24E+02 | 7.81E+00  | GTP binding prot protein phosphat     | NM_012227     | NM_012227                  |
| 2.24E+02 | 7.81E+00  | GTP binding prot protein phosphat     | NM_012227     | NM_012227                  |
| 2.68E+02 | 8.06E+00  | transmembrane inverted formin,        | NM_207379     | NM_207379                  |
| 2.68E+02 | 8.06E+00  | transmembrane inverted formin,        | NM_207379     | NM_207379                  |
| 2.68E+02 | 8.06E+00  | transmembrane inverted formin,        | NM_207379     | NM_207379                  |
| 4.21E-03 | -7.89E+00 | hypothetical LOC methionine sulfo     | NR_024281     | NR_024281                  |
| 2.18E+02 | 7.77E+00  | cone-rod homeo sulfotransferase       | NM_000554     | NM_000554                  |
| 3.16E+02 | 8.30E+00  | leucine rich repe leucine rich repe   | NM_144999     | NM_144999                  |
| 3.31E+02 | 8.37E+00  | nuclear factor of nuclear factor of   | NM_172387,NM  | NM_172387,NM_172389        |
| 4.59E-03 | -7.77E+00 | NADH dehydroge asparagine-linker      | NM_004549     | NM_004549                  |
| 3.80E+02 | 8.57E+00  | agrin agrin                           | NM_198576     | NM_198576                  |
| 3.34E+02 | 8.38E+00  | retinitis pigmenti chromosome 8 o     | NM_178857     | NM_178857                  |
| 2.90E+02 | 8.18E+00  | ATPase, Ca++ tra ATPase, Ca++ tra     | NM_173201,NM  | NM_173201,NM_004320        |
| 2.90E+02 | 8.18E+00  | ATPase, Ca++ tra ATPase, Ca++ tra     | NM_173201,NM  | NM_173201,NM_004320        |
| 3.30E+02 | 8.36E+00  | hypothetical LOC adrenergic, alph     | NR_027110     | NR_027110                  |
| 2.39E+02 | 7.90E+00  | v-erb-a erythrobl IKAROS family zii   | NM_005235,NM  | NM_005235,NM_001042599     |
| 2.39E+02 | 7.90E+00  | v-erb-a erythrobl IKAROS family zii   | NM_005235,NM  | NM_005235,NM_001042599     |
| 3.32E-03 | -8.23E+00 | mitogen-activate myocardin            | NM_003010     | NM_003010                  |
| 2.41E+02 | 7.91E+00  | pyridoxal (pyrido pyridoxal (pyrido   | NM_003681     | NM_003681                  |
| 2.41E+02 | 7.91E+00  | pyridoxal (pyrido pyridoxal (pyrido   | NM_003681     | NM_003681                  |
| 2.83E+02 | 8.14E+00  | FSHD region gene zinc finger protei   | NM_001124759  | NM_001124759               |
| 2.83E+02 | 8.14E+00  | FSHD region gene zinc finger protei   | NM_001124759  | NM_001124759               |
| 2.83E+02 | 8.14E+00  | FSHD region gene zinc finger protei   | NM_001124759  | NM_001124759               |
| 4.53E-03 | -7.78E+00 | small Cajal body- S-antigen           | NR_003006     | NR_003006                  |
| 2.97E+02 | 8.22E+00  | melanoma antigen melanoma antigen     | NM_001080790, | NM_001080790,NM_005365     |
| 3.45E-03 | -8.18E+00 | small nucleolar R stonin 2            | NR_003021     | NR_003021                  |
| 2.93E+02 | 8.20E+00  | platelet-derived ribosomal protei     | NM_002608,NM  | NM_002608,NM_033016        |
| 2.94E+02 | 8.20E+00  | polycystic kidney polycystic kidney   | NM_000296,NM  | NM_000296,NM_001009944     |
| 2.94E+02 | 8.20E+00  | polycystic kidney polycystic kidney   | NM_000296,NM  | NM_000296,NM_001009944     |
| 2.94E+02 | 8.20E+00  | polycystic kidney polycystic kidney   | NM_000296,NM  | NM_000296,NM_001009944     |
| 4.19E+02 | 8.71E+00  | carbohydrate kin carbohydrate kin     | NM_018210     | NM_018210                  |
| 2.29E+02 | 7.84E+00  | C1q and tumor n calcium channel,      | NM_207419     | NM_207419                  |
| 2.29E+02 | 7.84E+00  | C1q and tumor n calcium channel,      | NM_207419     | NM_207419                  |
| 2.67E+02 | 8.06E+00  | aarF domain con aarF domain con       | NM_174922     | NM_174922                  |
| 2.67E+02 | 8.06E+00  | aarF domain con aarF domain con       | NM_174922     | NM_174922                  |
| 2.34E+02 | 7.87E+00  | zinc finger and B' zinc finger and B' | NM_032792     | NM_032792                  |
| 2.34E+02 | 7.87E+00  | zinc finger and B' zinc finger and B' | NM_032792     | NM_032792                  |
| 4.47E-03 | -7.81E+00 | cytochrome P45(similar to hCG19)      | NM_000498     | NM_000498                  |
| 2.60E+02 | 8.02E+00  | regulator of G-pr regulator of G-pr   | NM_006480     | NM_006480                  |
| 4.64E-03 | -7.75E+00 | Smad nuclear int dynein, axonema      | NM_024700     | NM_024700                  |
| 2.25E+02 | 7.81E+00  | CDC42 binding pi CDC42 binding pi     | NM_017525     | NM_017525                  |

|          |           |                                                               |                                             |
|----------|-----------|---------------------------------------------------------------|---------------------------------------------|
| 2.91E+02 | 8.19E+00  | BTG3 associated zinc finger protei                            | NM_017869,NM_017869,NM_079837               |
| 2.38E+02 | 7.90E+00  | three prime repa HAUS augmin-lik                              | NM_080701 NM_080701                         |
| 3.07E+02 | 8.26E+00  | hypothetical FLJ4 hypothetical FLJ4                           | NR_002314 NR_002314                         |
| 2.53E+02 | 7.98E+00  | notch 1 notch 1                                               | NM_017617 NM_017617                         |
| 3.71E-03 | -8.07E+00 | family with sequi family with sequi                           | NM_015091 NM_015091                         |
| 4.19E+02 | 8.71E+00  | kelch-like 30 (Drc kelch-like 30 (Drc                         | NM_198582 NM_198582                         |
| 4.19E+02 | 8.71E+00  | kelch-like 30 (Drc kelch-like 30 (Drc                         | NM_198582 NM_198582                         |
| 3.38E-03 | -8.21E+00 | taste receptor, t <sub>y</sub> taste receptor, t <sub>y</sub> | NM_018980 NM_018980                         |
| 2.79E+02 | 8.12E+00  | dystrophia myot <sub>i</sub> dystrophia myot <sub>i</sub>     | NM_004943 NM_004943                         |
| 3.09E+02 | 8.27E+00  | family with sequi family with sequi                           | NM_001142864 NM_001142864                   |
| 3.09E+02 | 8.27E+00  | family with sequi family with sequi                           | NM_001142864 NM_001142864                   |
| 3.09E+02 | 8.27E+00  | family with sequi chromatin licensi                           | NM_001142864 NM_001142864                   |
| 3.12E+02 | 8.29E+00  | gametogenetin sprouty-related,                                | NM_152657 NM_152657                         |
| 5.15E-03 | -7.60E+00 | nuclear receptor translocation ass                            | NM_006540 NM_006540                         |
| 2.91E+02 | 8.19E+00  | solute carrier fan solute carrier fan                         | NM_001080431 NM_001080431                   |
| 2.00E+02 | 7.64E+00  | GNAS complex lc GNAS complex lc                               | NM_001077490, NM_001077490, NM_080425       |
| 2.57E+02 | 8.01E+00  | zinc finger, AN1-i zinc finger, AN1-i                         | NM_021943 NM_021943                         |
| 2.47E+02 | 7.95E+00  | C1q and tumor n poly (ADP-ribose                              | NM_178540 NM_178540                         |
| 2.47E+02 | 7.95E+00  | C1q and tumor n poly (ADP-ribose                              | NM_178540 NM_178540                         |
| 2.35E+02 | 7.88E+00  | zinc finger protei zinc finger protei                         | NM_014717 NM_014717                         |
| 4.62E+02 | 8.85E+00  | adherens junctio adherens junctio                             | NM_001042478, NM_001042478, NM_018836       |
| 4.62E+02 | 8.85E+00  | adherens junctio adherens junctio                             | NM_001042478, NM_001042478, NM_018836       |
| 3.47E+02 | 8.44E+00  | neugrin, neurite zinc finger protei                           | NM_001033088, NM_001033088, NM_016645       |
| 3.84E-03 | -8.03E+00 | heparan sulfate f chymotrypsin-lik                            | NM_005529 NM_005529                         |
| 2.02E+02 | 7.66E+00  | tripartite motif-c tripartite motif-c                         | NM_030912 NM_030912                         |
| 4.24E-03 | -7.88E+00 | glutathione S-tra D-dopachrome t:                             | NM_000854, NM_000854, NM_001080843          |
| 4.24E-03 | -7.88E+00 | glutathione S-tra D-dopachrome t:                             | NM_000854, NM_000854, NM_001080843          |
| 3.19E+02 | 8.32E+00  | lipid phosphate f lipid phosphate f                           | NM_022737 NM_022737                         |
| 3.50E+02 | 8.45E+00  | UBX domain prot <sub>i</sub> von Willebrand f                 | NM_152376 NM_152376                         |
| 3.04E+02 | 8.25E+00  | non-protein codi ankyrin repeat d:                            | NR_026795 NR_026795                         |
| 3.02E+02 | 8.24E+00  | thimet oligopept thimet oligopept                             | NM_003249 NM_003249                         |
| 3.02E+02 | 8.24E+00  | thimet oligopept thimet oligopept                             | NM_003249 NM_003249                         |
| 3.93E-03 | -7.99E+00 | Bcl2 modifying f <sub>a</sub> budding uninhibi                | NM_001003943, NM_001003943, NM_001003942, f |
| 3.93E-03 | -7.99E+00 | Bcl2 modifying f <sub>a</sub> budding uninhibi                | NM_001003943, NM_001003943, NM_001003942, f |
| 2.69E+02 | 8.07E+00  | zinc finger protei family with sequi                          | NM_001001662 NM_001001662                   |
| 2.69E+02 | 8.07E+00  | zinc finger protei family with sequi                          | NM_001001662 NM_001001662                   |
| 2.07E+02 | 7.69E+00  | forkhead box D4 forkhead box D4                               | NM_001126334 NM_001126334                   |
| 3.54E+02 | 8.47E+00  | zinc finger protei zinc finger protei                         | NM_198526 NM_198526                         |
| 3.54E+02 | 8.47E+00  | zinc finger protei zinc finger protei                         | NM_198526 NM_198526                         |
| 2.34E+02 | 7.87E+00  | family with sequi transmembrane                               | NM_001002919 NM_001002919                   |
| 2.34E+02 | 7.87E+00  | family with sequi transmembrane                               | NM_001002919 NM_001002919                   |
| 2.74E+02 | 8.10E+00  | ribosomal protei prospero homeo                               | NM_012424, NM_012424, NM_001136138          |
| 3.36E+02 | 8.39E+00  | small nuclear ribi RER1 retention ir                          | NR_024489 NR_024489                         |
| 3.36E+02 | 8.39E+00  | small nuclear ribi RER1 retention ir                          | NR_024489 NR_024489                         |
| 3.36E+02 | 8.39E+00  | small nuclear ribi RER1 retention ir                          | NR_024489 NR_024489                         |
| 2.43E+02 | 7.92E+00  | matrix metallope matrix metallope                             | NM_006983 NM_006983                         |
| 2.43E+02 | 7.92E+00  | matrix metallope matrix metallope                             | NM_006983 NM_006983                         |
| 2.43E+02 | 7.92E+00  | matrix metallope matrix metallope                             | NR_002946 NR_002946                         |
| 4.47E-03 | -7.81E+00 | CD79b molecule, sodium channel,                               | NM_000626, NM_000626, NM_021602, NM_001     |
| 2.25E+02 | 7.81E+00  | chromosome 16 clusterin associat                              | NM_001080524 NM_001080524                   |
| 2.72E+02 | 8.09E+00  | abhydrolase donr abhydrolase donr                             | NM_015407 NM_015407                         |
| 2.72E+02 | 8.09E+00  | abhydrolase donr aminoacylase 1                               | NM_015407 NM_015407                         |
| 2.19E+02 | 7.78E+00  | TPTE and PTEN h TPTE and PTEN h                               | NR_002821 NR_002821                         |
| 2.77E+02 | 8.11E+00  | keratinocyte gro <sub>i</sub> ankyrin repeat d:               | NR_003670 NR_003670                         |
| 2.70E+02 | 8.07E+00  | MDN1, midasin f caspase 8 associ:                             | NM_014611 NM_014611                         |
| 2.70E+02 | 8.07E+00  | MDN1, midasin f caspase 8 associ:                             | NM_014611 NM_014611                         |
| 3.81E+02 | 8.57E+00  | proline rich 22 proline rich 22                               | NM_153359, NM_153359, NM_001134316          |
| 3.81E+02 | 8.57E+00  | proline rich 22 proline rich 22                               | NM_153359, NM_153359, NM_001134316          |

|          |           |                                    |                    |                                          |                                          |
|----------|-----------|------------------------------------|--------------------|------------------------------------------|------------------------------------------|
| 2.77E+02 | 8.11E+00  | spermatid associ                   | spermatid associ   | NM_152719                                | NM_152719                                |
| 2.58E+02 | 8.01E+00  | agrins                             | chromosome 1 o     | NM_198576                                | NM_198576                                |
| 2.58E+02 | 8.01E+00  | agrins                             | chromosome 1 o     | NM_198576                                | NM_198576                                |
| 2.58E+02 | 8.01E+00  | agrins                             | chromosome 1 o     | NM_198576                                | NM_198576                                |
| 3.66E-03 | -8.10E+00 | ring-box 1                         | E1A binding prot   | NM_014248                                | NM_014248                                |
| 3.44E-03 | -8.18E+00 | signal transducer polymerase I anc |                    | NM_213662,NM_139276,NM_003               | NM_213662,NM_139276,NM_003               |
| 3.44E-03 | -8.18E+00 | signal transducer polymerase I anc |                    | NM_213662,NM_139276,NM_003               | NM_213662,NM_139276,NM_003               |
| 3.89E-03 | -8.01E+00 | adenosine A3 rec                   | adenosine A3 rec   | NM_000677                                | NM_000677                                |
| 3.89E-03 | -8.01E+00 | adenosine A3 rec                   | RAP1A, member      | NM_000677                                | NM_000677                                |
| 4.62E-03 | -7.76E+00 | alpha-1-microglo                   | kinesin family m   | NM_001633                                | NM_001633                                |
| 3.99E-03 | -7.97E+00 | heat shock 27kD                    | chromosome 11      | NM_001541                                | NM_001541                                |
| 2.32E+02 | 7.86E+00  | TEL2, telomere n                   | TEL2, telomere n   | NM_016111                                | NM_016111                                |
| 2.32E+02 | 7.86E+00  | TEL2, telomere n                   | TEL2, telomere n   | NM_016111                                | NM_016111                                |
| 2.33E+02 | 7.87E+00  | trinucleotide rep                  | trinucleotide rep  | NM_001080495                             | NM_001080495                             |
| 2.33E+02 | 7.87E+00  | trinucleotide rep                  | trinucleotide rep  | NM_001080495                             | NM_001080495                             |
| 3.75E-03 | -8.06E+00 | thromboxane A s                    | thromboxane A s    | NM_001130966                             | NM_001130966                             |
| 2.98E+02 | 8.22E+00  | chondroitin sulfa                  | histidine triad nu | NM_175856                                | NM_175856                                |
| 2.98E+02 | 8.22E+00  | chondroitin sulfa                  | histidine triad nu | NM_175856                                | NM_175856                                |
| 2.98E+02 | 8.22E+00  | chondroitin sulfa                  | histidine triad nu | NM_175856                                | NM_175856                                |
| 2.82E+02 | 8.14E+00  | DIP2 disco-intera                  | DIP2 disco-intera  | NM_014974                                | NM_014974                                |
| 4.24E-03 | -7.88E+00 | RNA binding mot                    | ets variant 2      | NM_024321                                | NM_024321                                |
| 3.01E+02 | 8.23E+00  | wingless-type MI                   | wingless-type MI   | NM_030761                                | NM_030761                                |
| 2.73E+02 | 8.09E+00  | null                               | phosphatidylinos   | null                                     | null                                     |
| 2.73E+02 | 8.09E+00  | null                               | phosphatidylinos   | null                                     | null                                     |
| 2.73E+02 | 8.09E+00  | null                               | phosphatidylinos   | null                                     | null                                     |
| 2.21E+02 | 7.79E+00  | BCL6 corepresso                    | BCL6 corepresso    | NM_001123383,NM_001123383,NM_001123384,N | NM_001123383,NM_001123383,NM_001123384,N |
| 2.93E+02 | 8.20E+00  | PQ loop repeat c                   | PQ loop repeat c   | NM_001146343,NM_001146343,NM_001146345,N | NM_001146343,NM_001146343,NM_001146345,N |
| 2.93E+02 | 8.20E+00  | PQ loop repeat c                   | PQ loop repeat c   | NM_001146343,NM_001146343,NM_001146345,N | NM_001146343,NM_001146343,NM_001146345,N |
| 2.69E+02 | 8.07E+00  | chromosome 10                      | UPF2 regulator o   | NM_153256                                | NM_153256                                |
| 2.69E+02 | 8.07E+00  | chromosome 10                      | UPF2 regulator o   | NM_153256                                | NM_153256                                |
| 4.03E-03 | -7.95E+00 | olfactory receptc                  | olfactory receptc  | NM_012363                                | NM_012363                                |
| 3.53E+02 | 8.46E+00  | RAB1B, member                      | RAB1B, member      | NM_030981                                | NM_030981                                |
| 2.68E+02 | 8.06E+00  | tyrosine kinase 2                  | tyrosine kinase 2  | NM_003331                                | NM_003331                                |
| 3.12E+02 | 8.29E+00  | poliovirus recept                  | poliovirus recept  | NM_002855                                | NM_002855                                |
| 3.12E+02 | 8.29E+00  | poliovirus recept                  | poliovirus recept  | NM_002855                                | NM_002855                                |
| 2.64E+02 | 8.04E+00  | LAG1 homolog, c                    | LAG1 homolog, c    | NM_178842                                | NM_178842                                |
| 3.97E-03 | -7.98E+00 | ATP-binding cass                   | claudin 10         | NM_001105515                             | NM_001105515                             |
| 3.97E-03 | -7.98E+00 | ATP-binding cass                   | claudin 10         | NM_001105515                             | NM_001105515                             |
| 3.28E+02 | 8.36E+00  | zinc finger protei                 | zinc finger protei | NM_014643                                | NM_014643                                |
| 2.42E+02 | 7.92E+00  | nuclear factor of                  | nuclear factor of  | NM_004554                                | NM_004554                                |
| 2.51E+02 | 7.97E+00  | solute carrier fan                 | solute carrier fan | NM_006598                                | NM_006598                                |
| 4.66E+02 | 8.86E+00  | lipase maturatioi                  | lipase maturatioi  | NM_022773                                | NM_022773                                |
| 4.66E+02 | 8.86E+00  | lipase maturatioi                  | lipase maturatioi  | NM_022773                                | NM_022773                                |
| 3.15E+02 | 8.30E+00  | transmembrane                      | forkhead box D1    | NM_153217                                | NM_153217                                |
| 3.15E+02 | 8.30E+00  | transmembrane                      | forkhead box D1    | NM_153217                                | NM_153217                                |
| 4.30E-03 | -7.86E+00 | VAMP (vesicle-as                   | adenomatosis pc    | NM_194434,NM_194434,NM_003574            | NM_194434,NM_194434,NM_003574            |
| 4.30E-03 | -7.86E+00 | VAMP (vesicle-as                   | adenomatosis pc    | NM_194434,NM_194434,NM_003574            | NM_194434,NM_194434,NM_003574            |
| 3.08E+02 | 8.27E+00  | peptidase D                        | peptidase D        | NM_000285                                | NM_000285                                |
| 3.08E+02 | 8.27E+00  | peptidase D                        | peptidase D        | NM_000285                                | NM_000285                                |
| 2.40E+02 | 7.91E+00  | solute carrier fan                 | solute carrier fan | NM_001042422                             | NM_001042422                             |
| 2.71E-03 | -8.53E+00 | hypothetical LOC                   | hypothetical LOC   | NR_026979                                | NR_026979                                |
| 2.76E+02 | 8.11E+00  | solute carrier fan                 | solute carrier fan | NM_006598                                | NM_006598                                |
| 2.28E+02 | 7.83E+00  | null                               | hypothetical LOC   | null                                     | null                                     |
| 2.28E+02 | 7.83E+00  | null                               | hypothetical LOC   | null                                     | null                                     |
| 2.93E+02 | 8.20E+00  | lon peptidase 1,                   | lon peptidase 1,   | NM_004793                                | NM_004793                                |
| 2.93E+02 | 8.20E+00  | lon peptidase 1,                   | lon peptidase 1,   | NM_004793                                | NM_004793                                |
| 2.18E+02 | 7.77E+00  | hypothetical LOC                   | hypothetical LOC   | NR_027069                                | NR_027069                                |
| 3.27E+02 | 8.35E+00  | ankyrin repeat d                   | ankyrin repeat d   | NM_013275                                | NM_013275                                |

|          |           |                       |                        |                                                        |                                                        |
|----------|-----------|-----------------------|------------------------|--------------------------------------------------------|--------------------------------------------------------|
| 3.27E+02 | 8.35E+00  | ankyrin repeat domain | ankyrin repeat domain  | NM_013275                                              | NM_013275                                              |
| 2.42E+02 | 7.92E+00  | chromosome 20         | chromosome 20          | NR_026959                                              | NR_026959                                              |
| 3.33E-03 | -8.23E+00 | adrenergic, alpha 2   | adrenergic, alpha 2    | NM_000680                                              | NM_000680                                              |
| 3.33E-03 | -8.23E+00 | adrenergic, alpha 2   | adrenergic, alpha 2    | NM_000680                                              | NM_000680                                              |
| 2.48E+02 | 7.95E+00  | inducible T-cell c    | DNA (cytosine-5-       | NM_015259                                              | NM_015259                                              |
| 2.48E+02 | 7.95E+00  | inducible T-cell c    | DNA (cytosine-5-       | NM_015259                                              | NM_015259                                              |
| 2.53E+02 | 7.98E+00  | collagen, type VI,    | collagen, type VI,     | NM_001849,NM_001849,NM_058175,NM_058175                | NM_001849,NM_001849,NM_058175,NM_058175                |
| 2.53E+02 | 7.98E+00  | collagen, type VI,    | collagen, type VI,     | NM_001849,NM_001849,NM_058175,NM_058175                | NM_001849,NM_001849,NM_058175,NM_058175                |
| 2.84E+02 | 8.15E+00  | lysine (K)-specific   | lysine (K)-specific    | NM_015015                                              | NM_015015                                              |
| 3.19E+02 | 8.32E+00  | fibrosin-like 1       | purinergic recept      | NM_001142641                                           | NM_001142641                                           |
| 3.30E+02 | 8.37E+00  | collagen, type XV     | collagen, type XV      | NM_030582,NM_030582,NM_130444                          | NM_030582,NM_030582,NM_130444                          |
| 2.30E+02 | 7.84E+00  | membrane meta         | membrane meta          | NM_033467                                              | NM_033467                                              |
| 3.57E-03 | -8.13E+00 | HIG1 hypoxia ind      | HIG1 hypoxia ind       | NR_002780                                              | NR_002780                                              |
| 2.70E+02 | 8.08E+00  | CCAAT/enhancer        | protein kinase, D      | NM_005195                                              | NM_005195                                              |
| 2.70E+02 | 8.08E+00  | CCAAT/enhancer        | protein kinase, D      | NM_005195                                              | NM_005195                                              |
| 3.60E-03 | -8.12E+00 | non-protein codi      | RUN domain con         | NR_026675                                              | NR_026675                                              |
| 3.60E-03 | -8.12E+00 | RUN domain con        | RUN domain con         | NM_001012391                                           | NM_001012391                                           |
| 4.43E-03 | -7.82E+00 | brain-enriched g      | chromosome 14          | NM_001159531, NM_001159531, NM_020836                  | NM_001159531, NM_001159531, NM_020836                  |
| 3.07E+02 | 8.26E+00  | regulator of G-pr     | HGF activator          | NM_198227                                              | NM_198227                                              |
| 3.02E+02 | 8.24E+00  | protein kinase D;     | protein kinase D;      | NM_016457,NM_016457,NM_001079880,NM_001079880          | NM_016457,NM_016457,NM_001079880,NM_001079880          |
| 4.02E-03 | -7.96E+00 | B-cell CLL/lymph      | cardiotrophin 1        | NM_004765                                              | NM_004765                                              |
| 1.43E+00 | 5.11E-01  | X antigen family,     | X antigen family,      | NM_020411,NM_020411,NM_133430,NM_133430                | NM_020411,NM_020411,NM_133430,NM_133430                |
| 1.43E+00 | 5.11E-01  | X antigen family,     | X antigen family,      | NM_020411,NM_020411,NM_133430,NM_133430                | NM_020411,NM_020411,NM_133430,NM_133430                |
| 4.21E-03 | -7.89E+00 | ring finger protei    | KIAA2022               | NM_183353,NM_183353,NM_016120                          | NM_183353,NM_183353,NM_016120                          |
| 3.07E+02 | 8.26E+00  | dihydropyrimidir      | dihydropyrimidir       | NM_006426                                              | NM_006426                                              |
| 3.07E+02 | 8.26E+00  | dihydropyrimidir      | serine/threonine       | NM_006426                                              | NM_006426                                              |
| 3.24E+02 | 8.34E+00  | phosphatidylinos      | phosphatidylinos       | NM_020820                                              | NM_020820                                              |
| 3.24E+02 | 8.34E+00  | phosphatidylinos      | phosphatidylinos       | NM_020820                                              | NM_020820                                              |
| 3.24E+02 | 8.34E+00  | spermatogenesis       | C1q and tumor n        | NM_153023                                              | NM_153023                                              |
| 3.40E-03 | -8.20E+00 | sulfotransferase      | sulfotransferase       | NM_177528,NM_177528,NM_001054                          | NM_177528,NM_177528,NM_001054                          |
| 2.93E+02 | 8.20E+00  | chromosome 19         | chromosome 19          | NM_138774                                              | NM_138774                                              |
| 2.93E+02 | 8.20E+00  | chromosome 19         | chromosome 19          | NM_138774                                              | NM_138774                                              |
| 3.67E-03 | -8.09E+00 | amelotin              | ameloblastin (en       | NM_212557                                              | NM_212557                                              |
| 3.67E-03 | -8.09E+00 | amelotin              | ameloblastin (en       | NM_212557                                              | NM_212557                                              |
| 2.55E+02 | 8.00E+00  | breakpoint clust      | zinc finger, DHH       | NM_004327,NM_004327,NM_021574                          | NM_004327,NM_004327,NM_021574                          |
| 2.48E+02 | 7.95E+00  | placenta-specific     | family with sequ       | NM_182832                                              | NM_182832                                              |
| 2.48E+02 | 7.95E+00  | placenta-specific     | family with sequ       | NM_182832                                              | NM_182832                                              |
| 2.59E+02 | 8.02E+00  | tubulin tyrosine      | I tubulin tyrosine     | I NM_001080447                                         | NM_001080447                                           |
| 2.52E+02 | 7.98E+00  | somatostatin rec      | somatostatin rec       | NM_001051                                              | NM_001051                                              |
| 2.88E+02 | 8.17E+00  | transmembrane         | forkhead box D1        | NM_153217                                              | NM_153217                                              |
| 3.50E+02 | 8.45E+00  | solute carrier fan    | solute carrier fan     | NM_194255                                              | NM_194255                                              |
| 3.50E+02 | 8.45E+00  | solute carrier fan    | solute carrier fan     | NM_194255                                              | NM_194255                                              |
| 2.71E+02 | 8.08E+00  | C1q and tumor n       | calcium channel,       | NM_207419                                              | NM_207419                                              |
| 1.31E+00 | 3.90E-01  | lipocalin 1 (tear     | odorant binding        | NM_002297                                              | NM_002297                                              |
| 3.33E+02 | 8.38E+00  | prostate tumor c      | prostate tumor c       | NM_017432                                              | NM_017432                                              |
| 2.30E+02 | 7.85E+00  | WNK lysine defic      | WNK lysine defic       | NM_006648                                              | NM_006648                                              |
| 2.81E+02 | 8.13E+00  | vestigial like 4      | (D chromosome 3 o      | NM_001128221, NM_001128221, NM_001128220, NM_001128220 | NM_001128221, NM_001128221, NM_001128220, NM_001128220 |
| 3.62E-03 | -8.11E+00 | hypothetical LOC      | fibrosin-like 1        | NR_024563                                              | NR_024563                                              |
| 3.62E-03 | -8.11E+00 | hypothetical LOC      | fibrosin-like 1        | NR_024563                                              | NR_024563                                              |
| 3.85E-03 | -8.02E+00 | heart and neural      | La ribonucleopro       | NM_004821                                              | NM_004821                                              |
| 2.42E+02 | 7.92E+00  | zinc finger protei    | zinc finger protei     | NM_001146175                                           | NM_001146175                                           |
| 2.42E+02 | 7.92E+00  | zinc finger protei    | zinc finger protei     | NM_032370                                              | NM_032370                                              |
| 2.77E+02 | 8.11E+00  | Rho GTPase acti       | FANCD2/FANCI- $\alpha$ | NM_001039841                                           | NM_001039841                                           |
| 2.77E+02 | 8.11E+00  | Rho GTPase acti       | FANCD2/FANCI- $\alpha$ | NM_001039841                                           | NM_001039841                                           |
| 2.78E+02 | 8.12E+00  | arginine-glutami      | arginine-glutami       | NM_001042682, NM_001042682, NM_012102, NM_012102       | NM_001042682, NM_001042682, NM_012102, NM_012102       |
| 2.75E+02 | 8.10E+00  | zinc finger protei    | zinc finger protei     | NM_152493                                              | NM_152493                                              |
| 3.00E+02 | 8.23E+00  | NLR family, pyrin     | NLR family, pyrin      | NM_017852                                              | NM_017852                                              |
| 2.19E+02 | 7.78E+00  | chromosome 4 o        | protocadherin 1        | NM_001099783                                           | NM_001099783                                           |

|          |           |                                                                              |              |
|----------|-----------|------------------------------------------------------------------------------|--------------|
| 2.19E+02 | 7.78E+00  | chromosome 4 o protocadherin 1( NM_001099783                                 | NM_001099783 |
| 4.03E-03 | -7.95E+00 | mitogen-activate hypothetical LOC NR_026901                                  | NR_026901    |
| 4.03E-03 | -7.95E+00 | mitogen-activate hypothetical LOC NR_026901                                  | NR_026901    |
| 2.70E+02 | 8.08E+00  | dysferlin interact prolyl 4-hydroxyl NM_001007533                            | NM_001007533 |
| 2.70E+02 | 8.08E+00  | dysferlin interact prolyl 4-hydroxyl NM_001007533                            | NM_001007533 |
| 4.78E-03 | -7.71E+00 | chromosome 6 o small ArfGAP 1 NM_145267                                      | NM_145267    |
| 3.80E-03 | -8.04E+00 | gamma-glutamyl transmembrane NM_178311,NM_178311,NM_178312                   |              |
| 2.91E+02 | 8.19E+00  | mucin 6, oligomε mucin 2, oligomε NM_005961                                  | NM_005961    |
| 2.40E+02 | 7.91E+00  | budding uninhibi acyl-CoA oxidase NM_004336                                  | NM_004336    |
| 2.67E+02 | 8.06E+00  | protein tyrosine protein tyrosine NM_130853,NM_130853,NM_130854,NM_002       |              |
| 2.67E+02 | 8.06E+00  | protein tyrosine protein tyrosine NM_130853,NM_130853,NM_130854,NM_002       |              |
| 2.35E+02 | 7.88E+00  | BTG3 associated zinc finger protei NM_017869,NM_017869,NM_079837             |              |
| 2.35E+02 | 7.88E+00  | BTG3 associated zinc finger protei NM_017869,NM_017869,NM_079837             |              |
| 3.43E-03 | -8.19E+00 | small nucleolar R small nucleolar R NR_003324,NR_( NR_003324,NR_003318       |              |
| 4.74E-03 | -7.72E+00 | protein phosphatase mannosidase, alφ NM_020416,NM_020416,NM_181876           |              |
| 4.74E-03 | -7.72E+00 | protein phosphatase mannosidase, alφ NM_020416,NM_020416,NM_181876           |              |
| 2.66E+02 | 8.05E+00  | unc-5 homolog A unc-5 homolog A NM_133369                                    | NM_133369    |
| 2.66E+02 | 8.05E+00  | unc-5 homolog A unc-5 homolog A NM_133369                                    | NM_133369    |
| 2.34E+02 | 7.87E+00  | glutathione S-tra glutathione S-tra NM_000848,NM_000848,NM_001142368         |              |
| 2.34E+02 | 7.87E+00  | glutathione S-tra glutathione S-tra NM_000561,NM_000561,NM_146421            |              |
| 3.54E+02 | 8.47E+00  | guanine nucleoti guanine nucleoti NM_001098722, NM_001098722,NM_001098721,†  |              |
| 3.29E+02 | 8.36E+00  | chondroitin sulfa chondroitin sulfa NM_001897                                | NM_001897    |
| 3.01E+02 | 8.23E+00  | hypothetical LOC hypothetical LOC NR_021490                                  | NR_021490    |
| 3.26E+02 | 8.35E+00  | AE binding prote AE binding prote NM_001129                                  | NM_001129    |
| 3.26E+02 | 8.35E+00  | AE binding prote AE binding prote NM_001129                                  | NM_001129    |
| 3.03E+02 | 8.24E+00  | T-cell, immune rε T-cell, immune rε NM_006019                                | NM_006019    |
| 3.51E+02 | 8.46E+00  | paralemmin paralemmin NM_001040134, NM_001040134,NM_002579                   |              |
| 3.51E+02 | 8.46E+00  | paralemmin paralemmin NM_001040134, NM_001040134,NM_002579                   |              |
| 2.88E+02 | 8.17E+00  | splicing factor 3a splicing factor 3a NM_007165                              | NM_007165    |
| 2.30E+02 | 7.84E+00  | TBC1 domain fan TBC1 domain fan NM_019020                                    | NM_019020    |
| 2.83E+02 | 8.14E+00  | thioesterase supε thioesterase supε NM_182578                                | NM_182578    |
| 2.83E+02 | 8.14E+00  | thioesterase supε thioesterase supε NM_182578                                | NM_182578    |
| 4.63E+02 | 8.85E+00  | DENN/MADD do DENN/MADD do NM_014856                                          | NM_014856    |
| 4.33E-03 | -7.85E+00 | acylphosphatase family with sequi NM_001107,NM_001107,NM_203488              |              |
| 4.33E-03 | -7.85E+00 | acylphosphatase family with sequi NM_001107,NM_001107,NM_203488              |              |
| 2.84E+02 | 8.15E+00  | neuroligin 4, Y-lir non-protein codi NM_014893                               | NM_014893    |
| 2.76E+02 | 8.11E+00  | protocadherin gε protocadherin gε NM_018922,NM_018922,NM_032095              |              |
| 4.50E-03 | -7.80E+00 | molybdenum cof molybdenum cof NM_001075098, NM_001075098,NM_138928,NM_       |              |
| 3.35E+02 | 8.39E+00  | transformation/t transformation/t NM_003496                                  | NM_003496    |
| 2.52E+02 | 7.98E+00  | branched chain a branched chain a NM_001190                                  | NM_001190    |
| 2.52E+02 | 7.98E+00  | branched chain a branched chain a NM_001190                                  | NM_001190    |
| 2.66E+02 | 8.05E+00  | lipase maturatioε lipase maturatioε NM_022773                                | NM_022773    |
| 2.66E+02 | 8.05E+00  | lipase maturatioε lipase maturatioε NM_022773                                | NM_022773    |
| 3.90E+02 | 8.61E+00  | acetylserotonin ( acetylserotonin ( NM_004043                                | NM_004043    |
| 4.92E-03 | -7.67E+00 | RAS, dexamethaε phosphatidylethε NM_016084                                   | NM_016084    |
| 2.70E+02 | 8.08E+00  | Rho/Rac guanine Rho/Rac guanine NM_001130955                                 | NM_001130955 |
| 2.70E+02 | 8.08E+00  | Rho/Rac guanine Rho/Rac guanine NM_001130955                                 | NM_001130955 |
| 3.14E+02 | 8.30E+00  | v-rel reticuloendi v-rel reticuloendi NM_006509                              | NM_006509    |
| 3.11E+02 | 8.28E+00  | topoisomerase (I topoisomerase (I NM_052963                                  | NM_052963    |
| 2.52E+02 | 7.98E+00  | zinc finger protei integrator compl NM_152626,NM_152626,NM_007139            |              |
| 2.52E+02 | 7.98E+00  | zinc finger protei integrator compl NM_152626,NM_152626,NM_007139            |              |
| 2.57E+02 | 8.01E+00  | adenine phosphc galactosamine (N NM_000485,NM_000485,NM_001030018            |              |
| 2.57E+02 | 8.01E+00  | inositol polyphos inositol polyphos NM_001135642, NM_001135642,NM_016532,NM_ |              |
| 2.57E+02 | 8.01E+00  | inositol polyphos inositol polyphos NM_001135642, NM_001135642,NM_016532,NM_ |              |
| 3.54E+02 | 8.47E+00  | notch 1 notch 1 NM_017617                                                    | NM_017617    |
| 3.39E-03 | -8.20E+00 | protease, serine, GINS complex su NM_001080492                               | NM_001080492 |
| 3.39E-03 | -8.20E+00 | protease, serine, GINS complex su NM_001080492                               | NM_001080492 |
| 2.85E+02 | 8.15E+00  | family with sequi family with sequi NM_001039762                             | NM_001039762 |

|          |           |                    |                    |               |                            |
|----------|-----------|--------------------|--------------------|---------------|----------------------------|
| 2.85E+02 | 8.15E+00  | family with sequi  | family with sequi  | NM_001039762  | NM_001039762               |
| 2.85E+02 | 8.15E+00  | family with sequi  | family with sequi  | NM_001039762  | NM_001039762               |
| 2.92E+02 | 8.19E+00  | RAS (RAD and GE    | RAS (RAD and GE    | NM_014012     | NM_014012                  |
| 2.83E+02 | 8.14E+00  | transcription fact | extracellular leuc | NR_001288     | NR_001288                  |
| 2.83E+02 | 8.14E+00  | extracellular leuc | extracellular leuc | NM_001128636  | NM_001128636               |
| 2.09E+02 | 7.70E+00  | adrenergic, alph   | adrenergic, alph   | NM_000683     | NM_000683                  |
| 2.99E+02 | 8.22E+00  | microtubule-assc   | microtubule-assc   | NM_018174     | NM_018174                  |
| 2.99E+02 | 8.22E+00  | microtubule-assc   | microtubule-assc   | NM_018174     | NM_018174                  |
| 2.99E+02 | 8.22E+00  | microtubule-assc   | microtubule-assc   | NM_018174     | NM_018174                  |
| 4.45E-03 | -7.81E+00 | meteorin, glial c  | family with sequi  | NM_024042     | NM_024042                  |
| 4.45E-03 | -7.81E+00 | meteorin, glial c  | family with sequi  | NM_024042     | NM_024042                  |
| 3.08E+02 | 8.27E+00  | RNA binding mot    | RNA binding mot    | NM_017495,NM  | NM_017495,NM_183425        |
| 2.33E+02 | 7.87E+00  | POTE ankyrin do    | hypothetical LOC   | NM_207355     | NM_207355                  |
| 2.33E+02 | 7.87E+00  | POTE ankyrin do    | hypothetical LOC   | NM_207355     | NM_207355                  |
| 3.19E+02 | 8.32E+00  | squamous cell ca   | squamous cell ca   | NM_005146     | NM_005146                  |
| 2.83E+02 | 8.14E+00  | notch 1            | EGF-like-domain,   | NM_017617     | NM_017617                  |
| 2.80E+02 | 8.13E+00  | chloride intracell | ATP-binding cass   | NM_004669     | NM_004669                  |
| 2.49E+02 | 7.96E+00  | tubulin folding c  | tubulin folding c  | NM_001281     | NM_001281                  |
| 2.49E+02 | 7.96E+00  | tubulin folding c  | tubulin folding c  | NM_001281     | NM_001281                  |
| 2.10E+02 | 7.72E+00  | kinesin family m   | kinesin family m   | NM_015656     | NM_015656                  |
| 2.10E+02 | 7.72E+00  | kinesin family m   | kinesin family m   | NM_015656     | NM_015656                  |
| 4.59E-03 | -7.77E+00 | ATP5S-like         | chromosome 19      | NM_018035     | NM_018035                  |
| 2.08E+02 | 7.70E+00  | zinc finger protei | zinc finger protei | NM_001033723  | NM_001033723               |
| 2.08E+02 | 7.70E+00  | zinc finger protei | zinc finger protei | NM_001033723  | NM_001033723               |
| 3.86E-03 | -8.02E+00 | leucine rich repe  | leucine rich repe  | NM_201650,NM  | NM_201650,NM_006992,NM_001 |
| 3.48E-03 | -8.17E+00 | ZFAT antisense R   | hypothetical LOC   | NR_002438     | NR_002438                  |
| 3.48E-03 | -8.17E+00 | ZFAT antisense R   | hypothetical LOC   | NR_002438     | NR_002438                  |
| 3.48E-03 | -8.17E+00 | ZFAT antisense R   | hypothetical LOC   | NR_002438     | NR_002438                  |
| 2.23E+02 | 7.80E+00  | sorting nexin 8    | eukaryotic transl  | NM_013321     | NM_013321                  |
| 2.56E+02 | 8.00E+00  | chromosome 3 o     | enoyl-CoA, hydr    | NM_001025266  | NM_001025266               |
| 2.56E+02 | 8.00E+00  | chromosome 3 o     | enoyl-CoA, hydr    | NM_001025266  | NM_001025266               |
| 3.91E-03 | -8.00E+00 | complement con     | complement con     | NM_001017367  | NM_001017367               |
| 4.40E-03 | -7.83E+00 | aspartate dehydr   | aspartate dehydr   | NM_001024656, | NM_001024656,NM_001114598  |
| 2.25E+02 | 7.81E+00  | cornichon homol    | glia maturation f  | NM_005776     | NM_005776                  |
| 2.25E+02 | 7.81E+00  | cornichon homol    | glia maturation f  | NM_005776     | NM_005776                  |
| 2.44E+02 | 7.93E+00  | chromosome 4 o     | chromosome 4 o     | NM_001039717  | NM_001039717               |
| 2.44E+02 | 7.93E+00  | chromosome 4 o     | chromosome 4 o     | NM_001039717  | NM_001039717               |
| 3.28E-03 | -8.25E+00 | regulatory factor  | regulatory factor  | NM_001145664  | NM_001145664               |
| 3.28E-03 | -8.25E+00 | regulatory factor  | mitogen-activate   | NM_001145664  | NM_001145664               |
| 2.21E+02 | 7.79E+00  | interleukin 17 r   | interleukin 17 r   | NM_001001694  | NM_001001694               |
| 4.21E-03 | -7.89E+00 | protein tyrosine   | protein tyrosine   | NM_130842,NM  | NM_130842,NM_130843,NM_002 |
| 3.65E+02 | 8.51E+00  | coiled-coil domai  | ADP-ribosylation   | NM_199287     | NM_199287                  |
| 3.65E+02 | 8.51E+00  | ADP-ribosylation   | ADP-ribosylation   | NM_001040025  | NM_001040025               |
| 2.58E+02 | 8.01E+00  | adaptor-related    | adaptor-related    | NM_012305     | NM_012305                  |
| 2.41E+02 | 7.91E+00  | mucin 5B, oligom   | mucin 5B, oligom   | NM_002458     | NM_002458                  |
| 3.94E-03 | -7.99E+00 | zinc finger, matri | zinc finger, matri | NM_001003692, | NM_001003692,NM_019103     |
| 4.90E-03 | -7.67E+00 | Src homology 2 c   | solute carrier fan | NM_138356     | NM_138356                  |
| 1.89E+00 | 9.16E-01  | keratin associate  | ubiquitin-conjug   | NM_198699     | NM_198699                  |
| 3.73E-03 | -8.07E+00 | G protein-couple   | G protein-couple   | NM_015234,NM  | NM_015234,NM_001098518     |
| 2.80E+02 | 8.13E+00  | phosphoglycerat    | phosphoglycerat    | NM_138575     | NM_138575                  |
| 3.02E+02 | 8.24E+00  | odz, odd Oz/ten-   | odz, odd Oz/ten-   | NM_001098816  | NM_001098816               |
| 3.02E+02 | 8.24E+00  | odz, odd Oz/ten-   | odz, odd Oz/ten-   | NM_001098816  | NM_001098816               |
| 2.92E+02 | 8.19E+00  | actin, gamma 1     | fascin homolog 2   | NM_001614     | NM_001614                  |
| 3.14E+02 | 8.30E+00  | mesothelin-like    | RNA pseudourid     | NM_001025190  | NM_001025190               |
| 2.96E-03 | -8.40E+00 | nucleotide-bindii  | nucleotide-bindii  | NM_022162     | NM_022162                  |
| 4.94E-03 | -7.66E+00 | ankyrin repeat d   | transmembrane      | NM_001146341  | NM_001146341               |
| 2.46E+02 | 7.94E+00  | hypothetical LOC   | hypothetical LOC   | NR_026882     | NR_026882                  |
| 3.81E+02 | 8.57E+00  | MAD1 mitotic ar    | MAD1 mitotic ar    | NM_003550,NM  | NM_003550,NM_001013837,NM_ |

|          |           |                     |                     |                                             |                            |
|----------|-----------|---------------------|---------------------|---------------------------------------------|----------------------------|
| 3.81E+02 | 8.57E+00  | MAD1 mitotic ar     | MAD1 mitotic ar     | NM_003550,NM                                | NM_003550,NM_001013837,NM_ |
| 3.56E+02 | 8.48E+00  | G protein-couple    | zinc finger, AN1-i  | NM_001098201                                | NM_001098201               |
| 3.66E+02 | 8.51E+00  | glutamate-rich 1    | discs, large (Dros  | NM_207332                                   | NM_207332                  |
| 3.66E+02 | 8.51E+00  | glutamate-rich 1    | discs, large (Dros  | NM_207332                                   | NM_207332                  |
| 3.66E+02 | 8.51E+00  | glutamate-rich 1    | discs, large (Dros  | NM_207332                                   | NM_207332                  |
| 3.66E+02 | 8.51E+00  | glutamate-rich 1    | discs, large (Dros  | NM_207332                                   | NM_207332                  |
| 3.94E-03 | -7.99E+00 | cholinergic recep   | solute carrier fan  | NM_000738                                   | NM_000738                  |
| 3.40E+02 | 8.41E+00  | kalirin, RhoGEF k   | kalirin, RhoGEF k   | NM_001024660, NM_001024660, NM_003947       |                            |
| 3.00E+02 | 8.23E+00  | protein tyrosine    | protein tyrosine    | NM_080588, NM_080588, NM_002832             |                            |
| 3.00E+02 | 8.23E+00  | protein tyrosine    | protein tyrosine    | NR_002930                                   | NR_002930                  |
| 2.21E+02 | 7.79E+00  | DNA (cytosine-5-    | autoimmune reg      | NM_013369, NM_013369, NM_175867             |                            |
| 2.56E+02 | 8.00E+00  | ras responsive el   | ras responsive el   | NM_001003698, NM_001003698, NM_001003699    |                            |
| 4.50E-03 | -7.80E+00 | G patch domain      | G patch domain      | NM_018025                                   | NM_018025                  |
| 2.76E+02 | 8.11E+00  | poly(A) polymerε    | poly(A) polymerε    | NM_020144                                   | NM_020144                  |
| 2.30E+02 | 7.84E+00  | docking protein     | docking protein     | NM_173660                                   | NM_173660                  |
| 2.30E+02 | 7.84E+00  | docking protein     | docking protein     | NM_173660                                   | NM_173660                  |
| 3.24E+02 | 8.34E+00  | Janus kinase 2      | Janus kinase 2      | NM_004972                                   | NM_004972                  |
| 4.15E-03 | -7.91E+00 | ninein (GSK3B in    | ninein (GSK3B in    | NM_182944                                   | NM_182944                  |
| 4.15E-03 | -7.91E+00 | ninein (GSK3B in    | ninein (GSK3B in    | NM_182944                                   | NM_182944                  |
| 2.60E+02 | 8.02E+00  | solute carrier fan  | splA/ryanodine r    | NM_018155, NM_018155, NM_001104647          |                            |
| 3.50E+02 | 8.45E+00  | testis-specific tra | testis-specific tra | NR_003593, NR_003593, NR_001540             |                            |
| 2.71E+02 | 8.08E+00  | FERM domain co      | dapper, antagoni    | NM_024919, NM_024919, NM_001122841          |                            |
| 4.85E-03 | -7.69E+00 | von Willebrand f    | CD9 molecule        | NM_000552                                   | NM_000552                  |
| 2.98E+02 | 8.22E+00  | ectonucleoside t    | ectonucleoside t    | NM_001033113, NM_001033113, NM_198585       |                            |
| 3.55E-03 | -8.14E+00 | SPT2, Suppressor    | transmembrane       | NM_194285                                   | NM_194285                  |
| 2.37E+02 | 7.89E+00  | H19, imprinted n    | insulin-like grow   | NR_002196                                   | NR_002196                  |
| 2.37E+02 | 7.89E+00  | H19, imprinted n    | insulin-like grow   | NR_002196                                   | NR_002196                  |
| 2.39E+02 | 7.90E+00  | otopetrin 1         | otopetrin 1         | NM_177998                                   | NM_177998                  |
| 3.93E-03 | -7.99E+00 | paired-like home    | golgi brefeldin A   | NM_005029                                   | NM_005029                  |
| 2.68E+02 | 8.06E+00  | regulator of telo   | regulator of telo   | NM_032957, NM_032957, NM_016434             |                            |
| 2.68E+02 | 8.06E+00  | regulator of telo   | regulator of telo   | NM_032957, NM_032957, NM_016434             |                            |
| 3.34E+02 | 8.38E+00  | ATPase, H+ trans    | ATPase, H+ trans    | NM_001694                                   | NM_001694                  |
| 2.94E+02 | 8.20E+00  | block of prolifera  | block of prolifera  | NM_015201                                   | NM_015201                  |
| 2.92E+02 | 8.19E+00  | chromosome 10       | chromosome 10       | NM_001098483                                | NM_001098483               |
| 2.92E+02 | 8.19E+00  | chromosome 10       | chromosome 10       | NM_001098483                                | NM_001098483               |
| 2.12E+02 | 7.73E+00  | Kruppel-like fact   | Kruppel-like fact   | NM_138693                                   | NM_138693                  |
| 2.12E+02 | 7.73E+00  | Kruppel-like fact   | Kruppel-like fact   | NM_138693                                   | NM_138693                  |
| 2.59E+02 | 8.02E+00  | myosin, heavy ct    | myosin, heavy ct    | NM_020884                                   | NM_020884                  |
| 2.59E+02 | 8.02E+00  | myosin, heavy ct    | myosin, heavy ct    | NM_020884                                   | NM_020884                  |
| 2.94E+02 | 8.20E+00  | small nuclear rib   | RER1 retention ir   | NR_024489                                   | NR_024489                  |
| 2.94E+02 | 8.20E+00  | small nuclear rib   | RER1 retention ir   | NR_024489                                   | NR_024489                  |
| 4.62E-03 | -7.76E+00 | serpin peptidase    | serpin peptidase    | NM_001085                                   | NM_001085                  |
| 2.15E+02 | 7.75E+00  | acetylserotonin     | acetylserotonin     | NM_004043                                   | NM_004043                  |
| 2.15E+02 | 7.75E+00  | acetylserotonin     | acetylserotonin     | NM_004043                                   | NM_004043                  |
| 3.63E+02 | 8.50E+00  | kinocilin           | MAP kinase inter    | NM_001097611                                | NM_001097611               |
| 2.39E+02 | 7.90E+00  | chromosome 2 o      | chromosome 2 o      | NM_207362                                   | NM_207362                  |
| 2.39E+02 | 7.90E+00  | chromosome 2 o      | chromosome 2 o      | NM_207362                                   | NM_207362                  |
| 2.80E+02 | 8.13E+00  | deoxyhypusine h     | deoxyhypusine h     | NM_031304, NM_031304, NM_001145165          |                            |
| 4.80E-03 | -7.70E+00 | apolipoprotein B    | apolipoprotein B    | NM_018690                                   | NM_018690                  |
| 2.81E+02 | 8.13E+00  | coiled-coil domai   | malic enzyme 3,     | NM_001156474, NM_001156474, NM_021827       |                            |
| 2.81E+02 | 8.13E+00  | coiled-coil domai   | malic enzyme 3,     | NM_001156474, NM_001156474, NM_021827       |                            |
| 3.20E+02 | 8.32E+00  | NADH dehydrogε      | nudix (nucleosidε   | NM_007103                                   | NM_007103                  |
| 3.20E+02 | 8.32E+00  | NADH dehydrogε      | nudix (nucleosidε   | NM_007103                                   | NM_007103                  |
| 3.20E+02 | 8.32E+00  | NADH dehydrogε      | nudix (nucleosidε   | NM_007103                                   | NM_007103                  |
| 2.68E+02 | 8.06E+00  | family with sequi   | POU class 5 hom     | NM_174911                                   | NM_174911                  |
| 2.68E+02 | 8.06E+00  | POU class 5 hom     | POU class 5 hom     | NM_001159542, NM_001159542, NR_002304       |                            |
| 3.36E-03 | -8.22E+00 | solute carrier fan  | solute carrier fan  | NM_015482, NM_015482, NM_021945             |                            |
| 3.85E-03 | -8.02E+00 | acyl-CoA oxidase    | BCL2-like 11 (apc   | NM_001142808, NM_001142808, NM_001105516, N |                            |



|          |           |                                         |                                         |                                                        |
|----------|-----------|-----------------------------------------|-----------------------------------------|--------------------------------------------------------|
| 2.46E+02 | 7.94E+00  | plectin                                 | plectin                                 | NM_000445,NM_000445,NM_201378,NM_201378                |
| 2.70E+02 | 8.07E+00  | BCL6 corepresso                         | BCL6 corepresso                         | NM_001123383, NM_001123383, NM_001123384, NM_001123384 |
| 1.32E+00 | 4.03E-01  | galactose-3-O-sulfatase                 | galactose-3-O-sulfatase                 | NM_004861 NM_004861                                    |
| 2.84E+02 | 8.15E+00  | remodeling and septin 7                 | remodeling and septin 7                 | NM_016578 NM_016578                                    |
| 2.84E+02 | 8.15E+00  | remodeling and septin 7                 | remodeling and septin 7                 | NM_016578 NM_016578                                    |
| 2.69E+02 | 8.07E+00  | galanin receptor                        | sal-like 3 (Drosophila)                 | NM_001480 NM_001480                                    |
| 2.69E+02 | 8.07E+00  | galanin receptor                        | sal-like 3 (Drosophila)                 | NM_001480 NM_001480                                    |
| 4.45E-03 | -7.81E+00 | HERPUD family                           | septin 7                                | NM_022373 NM_022373                                    |
| 4.01E-03 | -7.96E+00 | follistatin-like 1                      | NADH dehydrogenase                      | NM_007085 NM_007085                                    |
| 2.43E-03 | -8.69E+00 | tripartite motif-containing             | histone cluster 1                       | NM_006355 NM_006355                                    |
| 2.84E+02 | 8.15E+00  | ubiquitin protein DnaJ (Hsp40) homolog  |                                         | NM_014671 NM_014671                                    |
| 2.35E+02 | 7.88E+00  | nuclear receptor                        | nuclear receptor                        | NM_004959 NM_004959                                    |
| 2.35E+02 | 7.88E+00  | nuclear receptor                        | nuclear receptor                        | NM_004959 NM_004959                                    |
| 3.09E+02 | 8.27E+00  | DIP2 disco-interacting                  | DIP2 disco-interacting                  | NM_014974 NM_014974                                    |
| 2.23E+02 | 7.80E+00  | platelet-derived growth factor receptor | platelet-derived growth factor receptor | NM_002608, NM_002608, NM_033016                        |
| 2.23E+02 | 7.80E+00  | platelet-derived growth factor receptor | platelet-derived growth factor receptor | NM_002608, NM_002608, NM_033016                        |
| 2.25E+02 | 7.81E+00  | TNF- $\alpha$ 1-3 interact              | SH3-domain binding                      | NM_024309 NM_024309                                    |
| 2.40E+02 | 7.91E+00  | EPS8-like 3                             | colony stimulating factor 1 receptor    | NM_024526, NM_024526, NM_133181, NM_133181             |
| 2.40E+02 | 7.91E+00  | EPS8-like 3                             | colony stimulating factor 1 receptor    | NM_024526, NM_024526, NM_133181, NM_133181             |
| 2.60E+02 | 8.02E+00  | hypothetical LOC                        | calcium channel                         | NR_024341 NR_024341                                    |
| 2.60E+02 | 8.02E+00  | hypothetical LOC                        | calcium channel                         | NR_024341 NR_024341                                    |
| 3.49E+02 | 8.45E+00  | lipocalin 8                             | lipocalin 8                             | NM_178469 NM_178469                                    |
| 3.49E+02 | 8.45E+00  | lipocalin 8                             | lipocalin 8                             | NM_178469 NM_178469                                    |
| 3.49E+02 | 8.45E+00  | lipocalin 8                             | lipocalin 8                             | NM_178469 NM_178469                                    |
| 5.27E-03 | -7.57E+00 | par-6 partitioning                      | breast carcinoma 2                      | NM_032521 NM_032521                                    |
| 2.28E+02 | 7.83E+00  | G-protein signaling                     | G-protein signaling                     | NM_001145638, NM_001145638, NM_015597                  |
| 2.28E+02 | 7.83E+00  | G-protein signaling                     | G-protein signaling                     | NM_001145638, NM_001145638, NM_015597                  |
| 3.73E-03 | -8.07E+00 | poly(A)-specific ribonuclease           | MAS1 oncogene                           | NM_173516 NM_173516                                    |
| 3.73E-03 | -8.07E+00 | poly(A)-specific ribonuclease           | MAS1 oncogene                           | NM_173516 NM_173516                                    |
| 2.71E+02 | 8.08E+00  | solute carrier family                   | centrosomal protein                     | NM_004174 NM_004174                                    |
| 2.71E+02 | 8.08E+00  | solute carrier family                   | centrosomal protein                     | NM_004174 NM_004174                                    |
| 3.69E-03 | -8.08E+00 | serpin peptidase                        | serpin peptidase                        | NM_080474 NM_080474                                    |
| 2.90E+02 | 8.18E+00  | extracellular leucine                   | MFNG O-fucosyltransferase               | NM_052906 NM_052906                                    |
| 2.90E+02 | 8.18E+00  | extracellular leucine                   | MFNG O-fucosyltransferase               | NM_052906 NM_052906                                    |
| 2.81E-03 | -8.48E+00 | synaptic vesicle                        | solute carrier                          | org NM_014848 NM_014848                                |
| 3.15E+02 | 8.30E+00  | myosin VIIIB                            | myosin VIIIB                            | NM_001080527 NM_001080527                              |
| 3.15E+02 | 8.30E+00  | myosin VIIIB                            | myosin VIIIB                            | NM_001080527 NM_001080527                              |
| 2.54E+02 | 7.99E+00  | YdjC homolog (b)                        | YdjC homolog (b)                        | NM_001017964 NM_001017964                              |
| 2.37E+02 | 7.89E+00  | SRSF protein kinase                     | SRSF protein kinase                     | NM_182692, NM_182692, NM_182691                        |
| 3.66E-03 | -8.10E+00 | ADAM metalloproteinase                  | RUN and FYVE domain                     | NM_021599 NM_021599                                    |
| 3.66E-03 | -8.10E+00 | ADAM metalloproteinase                  | RUN and FYVE domain                     | NM_021599 NM_021599                                    |
| 2.01E+02 | 7.65E+00  | carbohydrate (N-linked)                 | carbohydrate (N-linked)                 | NM_004267 NM_004267                                    |
| 2.07E+02 | 7.69E+00  | acetylserotonin                         | acetylserotonin                         | NM_004192 NM_004192                                    |
| 2.07E+02 | 7.69E+00  | kinesin family member                   | kinesin family member                   | NM_015254 NM_015254                                    |
| 5.42E-03 | -7.53E+00 | cytokine receptor                       | colony stimulating factor 1 receptor    | NM_022148 NM_022148                                    |
| 4.19E-03 | -7.90E+00 | toll-like receptor family               | with sequin                             | NM_006068 NM_006068                                    |
| 4.19E-03 | -7.90E+00 | toll-like receptor family               | with sequin                             | NM_006068 NM_006068                                    |
| 3.48E-03 | -8.17E+00 | coiled-coil domain                      | coiled-coil domain                      | NM_001017437 NM_001017437                              |
| 3.70E-03 | -8.08E+00 | UDP glucuronosyl                        | UDP glucuronosyl                        | NM_019075 NM_019075                                    |
| 2.48E+02 | 7.95E+00  | protein phosphatase                     | protein phosphatase                     | NM_032902 NM_032902                                    |
| 2.48E+02 | 7.95E+00  | protein phosphatase                     | glutamic-pyruvate                       | NM_032902 NM_032902                                    |
| 3.57E-03 | -8.13E+00 | biorientation of                        | cytoplasmic polyoma                     | NM_138369, NM_138369, NM_001159651                     |
| 3.57E-03 | -8.13E+00 | biorientation of                        | cytoplasmic polyoma                     | NM_138369, NM_138369, NM_001159651                     |
| 2.81E+02 | 8.13E+00  | ArfGAP with Rho                         | StAR-related lipid                      | NM_001135190, NM_001135190, NM_015242, NM_015242       |
| 2.81E+02 | 8.13E+00  | ArfGAP with Rho                         | StAR-related lipid                      | NM_001135190, NM_001135190, NM_015242, NM_015242       |
| 3.07E-03 | -8.35E+00 | chromosome 17                           | chromosome 17                           | NM_001136483 NM_001136483                              |
| 3.07E-03 | -8.35E+00 | chromosome 17                           | chromosome 17                           | NM_001136483 NM_001136483                              |
| 3.58E-03 | -8.13E+00 | activating transcription                | ATP synthase, H+                        | NM_001130059, NM_001130059, NM_006856, NM_006856       |

|          |           |                                                                              |
|----------|-----------|------------------------------------------------------------------------------|
| 2.38E+02 | 7.90E+00  | leucine rich repe leucine rich repe NM_001080478 NM_001080478                |
| 3.07E+02 | 8.26E+00  | quaking homolog chromosome 6 o NM_006775,NM_006775,NM_206855,NM_206          |
| 3.07E+02 | 8.26E+00  | quaking homolog chromosome 6 o NM_006775,NM_006775,NM_206855,NM_206          |
| 3.01E-03 | -8.38E+00 | olfactory receptc tubulin, gamma c NM_001080841 NM_001080841                 |
| 3.37E+02 | 8.40E+00  | sodium channel, sodium channel, NM_001037,NM_001037,NM_199037                |
| 4.12E+02 | 8.69E+00  | acetylserotonin ( acetylserotonin ( NM_004043 NM_004043                      |
| 3.68E+02 | 8.52E+00  | tryptase alpha/b tryptase alpha/b NM_003294 NM_003294                        |
| 2.95E+02 | 8.21E+00  | ADAM metallope mortality factor c NM_014272 NM_014272                        |
| 3.10E+02 | 8.27E+00  | family with sequ KIAA0182 NM_198491 NM_198491                                |
| 4.19E-03 | -7.90E+00 | tripartite motif-c V-set domain cor NM_025188,NM_025188,NM_001145635         |
| 4.19E-03 | -7.90E+00 | tripartite motif-c V-set domain cor NM_025188,NM_025188,NM_001145635         |
| 3.15E+02 | 8.30E+00  | nanos homolog z nanos homolog z NM_001029861 NM_001029861                    |
| 2.49E+02 | 7.96E+00  | Rho GTPase activ Rho GTPase activ NM_020876 NM_020876                        |
| 2.90E+02 | 8.18E+00  | mitogen-activate mitogen-activate NM_002969 NM_002969                        |
| 3.24E+02 | 8.34E+00  | inositol polyphos inositol polyphos NM_005539 NM_005539                      |
| 2.27E+02 | 7.82E+00  | SRSF protein kinz SRSF protein kinz NM_014370 NM_014370                      |
| 4.05E-03 | -7.95E+00 | hexokinase 3 (w/ ubiquitin interacti NM_002115 NM_002115                     |
| 4.70E-03 | -7.73E+00 | PQ loop repeat c PQ loop repeat c NM_001040125, NM_001040125,NM_001040126,N  |
| 2.93E+02 | 8.20E+00  | splicing factor 3a splicing factor 3a NM_007165 NM_007165                    |
| 3.09E+02 | 8.27E+00  | solute carrier fan poly(rC) binding j NM_194255 NM_194255                    |
| 2.70E+02 | 8.08E+00  | Rho guanine nuc Rho guanine nuc NM_153213 NM_153213                          |
| 3.08E+02 | 8.27E+00  | PDZ and LIM don PDZ and LIM don NM_001131027, NM_001131027,NM_003687         |
| 3.08E+02 | 8.27E+00  | PDZ and LIM don PDZ and LIM don NM_001131027, NM_001131027,NM_003687         |
| 3.47E+02 | 8.44E+00  | hypothetical LOC fibrosin-like 1 NR_024563 NR_024563                         |
| 3.47E+02 | 8.44E+00  | hypothetical LOC fibrosin-like 1 NR_024563 NR_024563                         |
| 4.13E-03 | -7.92E+00 | zinc finger protei zinc finger protei NR_003936,NM_003936,NM_001105550,NM_0  |
| 2.94E+02 | 8.20E+00  | plectin plectin NM_000445,NM_000445,NM_201378,NM_201                         |
| 2.94E+02 | 8.20E+00  | plectin plectin NM_000445,NM_000445,NM_201378,NM_201                         |
| 2.94E+02 | 8.20E+00  | plectin plectin NM_000445,NM_000445,NM_201378,NM_201                         |
| 4.13E-03 | -7.92E+00 | cartilage acidic p chromosome 10 NM_018058 NM_018058                         |
| 3.51E+02 | 8.46E+00  | SRY (sex determi protein interacti NM_006941 NM_006941                       |
| 3.51E+02 | 8.46E+00  | SRY (sex determi protein interacti NM_006941 NM_006941                       |
| 4.52E-03 | -7.79E+00 | Rap guanine nucl Rap guanine nucl NM_005312,NM_005312,NM_198679              |
| 4.52E-03 | -7.79E+00 | Rap guanine nucl Rap guanine nucl NM_005312,NM_005312,NM_198679              |
| 3.07E+02 | 8.26E+00  | mitogen-activate mitogen-activate NM_016431 NM_016431                        |
| 3.07E+02 | 8.26E+00  | mitogen-activate mitogen-activate NM_016431 NM_016431                        |
| 3.37E-03 | -8.21E+00 | retrotransposon teratocarcinoma NM_020769 NM_020769                          |
| 3.37E-03 | -8.21E+00 | teratocarcinoma teratocarcinoma NR_002718 NR_002718                          |
| 4.15E+02 | 8.70E+00  | outer dense fibei outer dense fibei NM_182577 NM_182577                      |
| 4.61E-03 | -7.76E+00 | T-cell activation I fibronectin type NM_138810 NM_138810                     |
| 3.23E+02 | 8.33E+00  | AT rich interactiv AT rich interactiv NM_005224 NM_005224                    |
| 3.23E+02 | 8.33E+00  | AT rich interactiv AT rich interactiv NM_005224 NM_005224                    |
| 3.23E+02 | 8.33E+00  | AT rich interactiv AT rich interactiv NM_005224 NM_005224                    |
| 3.34E+02 | 8.38E+00  | glutamic-oxaloac NK2 transcriptior NM_002079 NM_002079                       |
| 3.34E+02 | 8.38E+00  | glutamic-oxaloac NK2 transcriptior NM_002079 NM_002079                       |
| 3.98E+02 | 8.64E+00  | cell division cycle granzyme M (lyr NM_004359 NM_004359                      |
| 2.19E+02 | 7.78E+00  | coiled-coil doma coiled-coil doma NM_001143980 NM_001143980                  |
| 3.46E-03 | -8.17E+00 | X (inactive)-speci X (inactive)-speci NR_001564 NR_001564                    |
| 3.96E+02 | 8.63E+00  | lysine (K)-specific lysine (K)-specific NM_001005366, NM_001005366,NM_032590 |
| 3.43E+02 | 8.42E+00  | chromosome 11 peroxisomal biog NM_001080446 NM_001080446                     |
| 3.73E-03 | -8.07E+00 | G protein-couple G protein-couple NM_015234,NM_015234,NM_001098518           |
| 3.73E-03 | -8.07E+00 | G protein-couple G protein-couple NM_015234,NM_015234,NM_001098518           |
| 2.52E+02 | 7.98E+00  | anaphase promo anaphase promo NM_013366 NM_013366                            |
| 4.08E-03 | -7.94E+00 | topoisomerase (I transferrin NM_007027 NM_007027                             |
| 4.08E-03 | -7.94E+00 | topoisomerase (I transferrin NM_007027 NM_007027                             |
| 2.69E+02 | 8.07E+00  | telomerase rever telomerase rever NM_198253,NM_198253,NM_198255              |
| 4.37E-03 | -7.84E+00 | solute carrier fan ARP3 actin-relate NM_025181 NM_025181                     |
| 2.65E+02 | 8.05E+00  | ankyrin repeat d G protein-couple NR_027019,NR_027019,NR_027020              |

|          |           |                                      |                    |                                               |
|----------|-----------|--------------------------------------|--------------------|-----------------------------------------------|
| 2.65E+02 | 8.05E+00  | ankyrin repeat d                     | G protein-couple   | NR_027019,NR_027019,NR_027020                 |
| 4.42E-03 | -7.82E+00 | transmembrane                        | ADAMTS-like 2      | NM_001080483 NM_001080483                     |
| 2.61E+02 | 8.03E+00  | basigin (Ok blood hyperpolarization) |                    | NM_001728,NM_001728,NM_198589                 |
| 2.34E+02 | 7.87E+00  | ADAM metallope                       | ADAM metallope     | NM_005099 NM_005099                           |
| 2.43E+02 | 7.92E+00  | inositol polyphos                    | inositol polyphos  | NR_003251,NM_003251,NM_014937                 |
| 4.50E-03 | -7.80E+00 | zona pellucida gl                    | zona pellucida gl  | NM_021186 NM_021186                           |
| 4.50E-03 | -7.80E+00 | zona pellucida gl                    | zona pellucida gl  | NM_021186 NM_021186                           |
| 4.61E-03 | -7.76E+00 | NK6 homeobox 1                       | CDP-diacylglycer   | NM_006168 NM_006168                           |
| 4.66E-03 | -7.75E+00 | tribbles homolog                     | RanBP-type and     | NM_021158 NM_021158                           |
| 1.97E+02 | 7.62E+00  | pim-3 oncogene                       | pim-3 oncogene     | NM_001001852 NM_001001852                     |
| 1.44E+00 | 5.22E-01  | similar to cDNA s                    | similar to cDNA s  | NM_001013729 NM_001013729                     |
| 1.44E+00 | 5.22E-01  | similar to cDNA s                    | chromosome 21      | NM_001013729 NM_001013729                     |
| 1.44E+00 | 5.22E-01  | similar to cDNA s                    | chromosome 21      | NM_001013729 NM_001013729                     |
| 3.03E+02 | 8.24E+00  | protocadherin g                      | protocadherin g    | NM_018929,NM_018929,NM_032407                 |
| 2.07E+02 | 7.69E+00  | chromodomain                         | chromodomain       | NR_026590 NR_026590                           |
| 2.07E+02 | 7.69E+00  | chromodomain                         | chromodomain       | NR_026590 NR_026590                           |
| 3.20E+02 | 8.32E+00  | olfactory receptc                    | olfactory receptc  | NR_002158 NR_002158                           |
| 4.94E-03 | -7.66E+00 | G protein-couple                     | DEAH (Asp-Glu-A    | NM_018485 NM_018485                           |
| 4.24E-03 | -7.88E+00 | neuroblastoma b                      | neuroblastoma b    | NM_001143989 NM_001143989                     |
| 3.88E+02 | 8.60E+00  | SIX homeobox 2                       | S1 RNA binding c   | NM_016932 NM_016932                           |
| 3.88E+02 | 8.60E+00  | SIX homeobox 2                       | S1 RNA binding c   | NM_016932 NM_016932                           |
| 3.49E-03 | -8.16E+00 | hypothetical LOC                     | peroxisome proli   | NR_027033 NR_027033                           |
| 3.74E+02 | 8.55E+00  | coagulation factc                    | H2A histone fam    | NM_001007524,NM_001007524,NM_001007523        |
| 3.90E-03 | -8.00E+00 | nuclear factor of                    | nuclear factor of  | NM_172387,NM_172387,NM_172389                 |
| 2.21E+02 | 7.79E+00  | BCL2-associated                      | inositol polyphos  | NM_004281 NM_004281                           |
| 2.21E+02 | 7.79E+00  | BCL2-associated                      | inositol polyphos  | NM_004281 NM_004281                           |
| 3.22E+02 | 8.33E+00  | Rho guanine nuc                      | Rho guanine nuc    | NM_001113513 NM_001113513                     |
| 3.22E+02 | 8.33E+00  | Rho guanine nuc                      | Rho guanine nuc    | NM_001113513 NM_001113513                     |
| 3.04E+02 | 8.25E+00  | solute carrier fan                   | solute carrier fan | NM_015063 NM_015063                           |
| 3.79E-03 | -8.04E+00 | 5,10-methenylite                     | suppressor of tur  | NM_006441 NM_006441                           |
| 4.55E-03 | -7.78E+00 | MOB1, Mps One                        | methylenetetrah    | NM_018221 NM_018221                           |
| 2.78E+02 | 8.12E+00  | EPS8-like 1                          | EPS8-like 1        | NM_133180 NM_133180                           |
| 3.77E-03 | -8.05E+00 | chromosome 6 o                       | D-aspartate oxid   | NM_001123364 NM_001123364                     |
| 2.76E+02 | 8.11E+00  | diacylglycerol lip                   | diacylglycerol lip | NM_006133 NM_006133                           |
| 2.64E+02 | 8.04E+00  | deiodinase, iodo                     | non-protein codi   | NM_001362 NM_001362                           |
| 3.86E-03 | -8.02E+00 | zinc finger protei                   | zinc finger protei | NM_001099694 NM_001099694                     |
| 3.86E-03 | -8.02E+00 | zinc finger protei                   | zinc finger protei | NM_001099694 NM_001099694                     |
| 4.52E-03 | -7.79E+00 | keratin associate                    | keratin associate  | NM_181605 NM_181605                           |
| 4.52E-03 | -7.79E+00 | keratin associate                    | keratin associate  | NM_181604 NM_181604                           |
| 4.29E-03 | -7.87E+00 | RNA binding mot                      | receptor (G prot   | NM_001080504 NM_001080504                     |
| 3.90E-03 | -8.00E+00 | syntrophin, beta                     | vacuolar protein   | NM_006750 NM_006750                           |
| 2.30E+02 | 7.84E+00  | nuclear receptor                     | nuclear receptor   | NM_006312,NM_006312,NM_001077261              |
| 2.30E+02 | 7.84E+00  | nuclear receptor                     | nuclear receptor   | NM_006312,NM_006312,NM_001077261              |
| 3.20E+02 | 8.32E+00  | wingless-type MI                     | wingless-type MI   | NM_030761 NM_030761                           |
| 2.60E+02 | 8.02E+00  | zinc finger, CCHC                    | zinc finger, CCHC  | NM_015144 NM_015144                           |
| 2.60E+02 | 8.02E+00  | zinc finger, CCHC                    | zinc finger, CCHC  | NM_015144 NM_015144                           |
| 2.49E+02 | 7.96E+00  | ArfGAP with Rho                      | StAR-related lipic | NM_001135190,NM_001135190,NM_015242,NM_006645 |
| 2.49E+02 | 7.96E+00  | StAR-related lipic                   | StAR-related lipic | NM_006645 NM_006645                           |
| 3.90E-03 | -8.00E+00 | synapsin III                         | synapsin III       | NM_001135774,NM_001135774,NM_003490,NM_152328 |
| 3.26E+02 | 8.35E+00  | adenylosuccinat                      | adenylosuccinat    | NM_152328 NM_152328                           |
| 3.91E-03 | -8.00E+00 | zinc finger protei                   | zinc finger protei | NM_153257 NM_153257                           |
| 2.89E+02 | 8.17E+00  | protein phosphat                     | protein phosphat   | NM_013239,NM_013239,NM_199326                 |
| 2.89E+02 | 8.17E+00  | protein phosphat                     | protein phosphat   | NM_013239,NM_013239,NM_199326                 |
| 2.89E+02 | 8.17E+00  | protein phosphat                     | protein phosphat   | NM_013239,NM_013239,NM_199326                 |
| 3.76E-03 | -8.05E+00 | ELAV (embryonic                      | DMRT-like family   | NM_021952,NM_021952,NM_001144774              |
| 3.76E-03 | -8.05E+00 | ELAV (embryonic                      | DMRT-like family   | NM_021952,NM_021952,NM_001144774              |
| 4.85E-03 | -7.69E+00 | RNA binding prot                     | ATP-binding cass   | NM_006711,NM_006711,NM_080594                 |
| 4.85E-03 | -7.69E+00 | RNA binding prot                     | ATP-binding cass   | NM_006711,NM_006711,NM_080594                 |

|          |           |                                       |                                             |              |
|----------|-----------|---------------------------------------|---------------------------------------------|--------------|
| 4.59E-03 | -7.77E+00 | inverted formin, adenylosuccinate     | NM_032714                                   | NM_032714    |
| 4.15E-03 | -7.91E+00 | protein tyrosine cripto, FRL-1, cry   | NM_001142370, NM_001142370, NM_014369       |              |
| 4.47E-03 | -7.81E+00 | purinergic recept G protein-couple    | NM_014879, NM_014879, NM_001081455          |              |
| 3.53E+02 | 8.46E+00  | H19, imprinted n insulin-like grow    | NR_002196                                   | NR_002196    |
| 2.23E+02 | 7.80E+00  | patched 1 chromosome 9 o              | NM_001083602, NM_001083602, NM_001083603, N |              |
| 2.23E+02 | 7.80E+00  | patched 1 chromosome 9 o              | NM_001083602, NM_001083602, NM_001083603, N |              |
| 2.83E+02 | 8.14E+00  | mucin 6, oligome mucin 6, oligome     | NM_005961                                   | NM_005961    |
| 2.57E+02 | 8.01E+00  | lipocalin 12 prostaglandin D2         | NM_178536                                   | NM_178536    |
| 2.57E+02 | 8.01E+00  | lipocalin 12 prostaglandin D2         | NM_178536                                   | NM_178536    |
| 4.23E+02 | 8.72E+00  | zinc finger RNA b zinc finger RNA b   | NM_015174                                   | NM_015174    |
| 3.34E+02 | 8.38E+00  | multiple endocrii multiple endocrii   | NM_130801, NM_130801, NM_130800, NM_00C     |              |
| 3.34E+02 | 8.38E+00  | multiple endocrii multiple endocrii   | NM_130801, NM_130801, NM_130800, NM_00C     |              |
| 3.34E+02 | 8.38E+00  | multiple endocrii multiple endocrii   | NM_130801, NM_130801, NM_130800, NM_00C     |              |
| 2.54E+02 | 7.99E+00  | crystallin, beta A myocardial infar   | NM_001886                                   | NM_001886    |
| 2.12E+02 | 7.73E+00  | guanine nucleoti sphingosine-1-ph     | NM_002068                                   | NM_002068    |
| 2.12E+02 | 7.73E+00  | sphingosine-1-ph sphingosine-1-ph     | NM_003775                                   | NM_003775    |
| 2.85E+02 | 8.15E+00  | retinol binding p ubiquitination fa   | NM_052960                                   | NM_052960    |
| 2.16E+02 | 7.76E+00  | hypothetical LOC solute carrier fan   | NR_027102                                   | NR_027102    |
| 3.84E+02 | 8.58E+00  | leprecan-like 2 leprecan-like 2       | NM_014262                                   | NM_014262    |
| 2.70E+02 | 8.08E+00  | hypothetical LOC hypothetical LOC     | NR_027242                                   | NR_027242    |
| 2.86E+02 | 8.16E+00  | pecanex-like 2 (C pecanex-like 2 (C   | NM_014801                                   | NM_014801    |
| 2.96E+02 | 8.21E+00  | oculocutaneous : oculocutaneous :     | NM_000275                                   | NM_000275    |
| 3.91E-03 | -8.00E+00 | lysophosphatidyl lysophosphatidyl     | NM_017839                                   | NM_017839    |
| 3.91E-03 | -8.00E+00 | calpain, small sul calpain, small sul | NM_032330                                   | NM_032330    |
| 2.97E+02 | 8.22E+00  | ephrin-A2 melanoma assoc              | NM_001405                                   | NM_001405    |
| 2.97E+02 | 8.22E+00  | ephrin-A2 melanoma assoc              | NM_001405                                   | NM_001405    |
| 2.84E+02 | 8.15E+00  | transmembrane KIAA0125                | NM_025268                                   | NM_025268    |
| 2.84E+02 | 8.15E+00  | transmembrane KIAA0125                | NM_025268                                   | NM_025268    |
| 2.14E+02 | 7.74E+00  | C2 calcium-depe C2 calcium-depe       | NM_001136263                                | NM_001136263 |
| 2.14E+02 | 7.74E+00  | C2 calcium-depe C2 calcium-depe       | NM_001136263                                | NM_001136263 |
| 2.96E+02 | 8.21E+00  | hypothetical LOC hypothetical LOC     | NR_027314                                   | NR_027314    |
| 3.18E+02 | 8.31E+00  | chromosome 6 o chromosome 6 o         | NM_173563                                   | NM_173563    |
| 4.08E-03 | -7.94E+00 | SEC62 homolog ( G protein-couple      | NM_003262                                   | NM_003262    |
| 2.44E+02 | 7.93E+00  | nucleoredoxin nucleoredoxin           | NM_022463                                   | NM_022463    |
| 2.44E+02 | 7.93E+00  | nucleoredoxin nucleoredoxin           | NM_022463                                   | NM_022463    |
| 3.24E+02 | 8.34E+00  | cyclic nucleotide melanoma antig      | NM_005140                                   | NM_005140    |
| 3.24E+02 | 8.34E+00  | cyclic nucleotide melanoma antig      | NM_005140                                   | NM_005140    |
| 3.24E+02 | 8.34E+00  | cyclic nucleotide melanoma antig      | NM_005140                                   | NM_005140    |
| 3.24E+02 | 8.34E+00  | melanoma antig melanoma antig         | NM_001011548                                | NM_001011548 |
| 3.24E+02 | 8.34E+00  | melanoma antig melanoma antig         | NM_001011548                                | NM_001011548 |
| 3.24E+02 | 8.34E+00  | melanoma antig melanoma antig         | NM_001011548                                | NM_001011548 |
| 3.24E+02 | 8.34E+00  | melanoma antig melanoma antig         | NM_001011548                                | NM_001011548 |
| 3.24E+02 | 8.34E+00  | melanoma antig melanoma antig         | NM_001011548                                | NM_001011548 |
| 3.24E+02 | 8.34E+00  | melanoma antig melanoma antig         | NM_001011548                                | NM_001011548 |
| 3.24E+02 | 8.34E+00  | melanoma antig melanoma antig         | NM_001011550                                | NM_001011550 |
| 3.63E-03 | -8.10E+00 | prostaglandin D2 prostaglandin E r    | NM_000953                                   | NM_000953    |
| 3.31E+02 | 8.37E+00  | glutamate recept activating transci   | NM_001134408                                | NM_001134408 |
| 3.18E+02 | 8.31E+00  | solute carrier org solute carrier org | NM_016354                                   | NM_016354    |
| 3.18E+02 | 8.31E+00  | solute carrier org solute carrier org | NM_016354                                   | NM_016354    |
| 2.91E+02 | 8.19E+00  | similar to HGC6.: kinesin family me   | NM_001129895                                | NM_001129895 |
| 2.91E+02 | 8.19E+00  | similar to HGC6.: kinesin family me   | NM_001129895                                | NM_001129895 |
| 2.91E+02 | 8.19E+00  | similar to HGC6.: kinesin family me   | NM_001129895                                | NM_001129895 |
| 2.91E+02 | 8.19E+00  | similar to HGC6.: kinesin family me   | NM_001129895                                | NM_001129895 |
| 2.68E+02 | 8.06E+00  | chromosome 15 chromosome 15           | NM_015492                                   | NM_015492    |
| 2.68E+02 | 8.06E+00  | chromosome 15 chromosome 15           | NM_015492                                   | NM_015492    |
| 3.19E+02 | 8.32E+00  | zinc finger protei hect domain and    | NM_003414                                   | NM_003414    |
| 3.80E+02 | 8.57E+00  | MEF2 activating Ras interacting p     | NM_001130915, NM_001130915, NM_182574       |              |

|          |           |                                                                                 |
|----------|-----------|---------------------------------------------------------------------------------|
| 2.82E+02 | 8.14E+00  | G protein-couple G protein-couple NM_019858,NM_019858,NM_014449                 |
| 2.82E+02 | 8.14E+00  | G protein-couple G protein-couple NM_019858,NM_019858,NM_014449                 |
| 2.95E+02 | 8.21E+00  | plectin plectin NM_000445,NM_000445,NM_201378,NM_201                            |
| 4.76E-03 | -7.72E+00 | endoplasmic reti calcineurin B hor NM_033266 NM_033266                          |
| 4.76E-03 | -7.72E+00 | endoplasmic reti calcineurin B hor NM_033266 NM_033266                          |
| 3.32E+02 | 8.38E+00  | solute carrier fan solute carrier fan NM_033102 NM_033102                       |
| 2.08E+02 | 7.70E+00  | limb region 1 hor nucleolar proteir NM_022458 NM_022458                         |
| 2.08E+02 | 7.70E+00  | limb region 1 hor nucleolar proteir NM_022458 NM_022458                         |
| 4.61E-03 | -7.76E+00 | phosphodiesterase SEC22 vesicle tra NM_001002810, NM_001002810,NM_022359        |
| 4.61E-03 | -7.76E+00 | phosphodiesterase SEC22 vesicle tra NM_001002810, NM_001002810,NM_022359        |
| 2.18E+02 | 7.77E+00  | notch 1 notch 1 NM_017617 NM_017617                                             |
| 3.58E+02 | 8.48E+00  | slit homolog 1 (D slit homolog 1 (D NM_003061 NM_003061                         |
| 3.58E+02 | 8.48E+00  | slit homolog 1 (D slit homolog 1 (D NM_003061 NM_003061                         |
| 3.58E+02 | 8.48E+00  | slit homolog 1 (D slit homolog 1 (D NM_003061 NM_003061                         |
| 4.94E+02 | 8.95E+00  | solute carrier fan solute carrier fan NM_003562 NM_003562                       |
| 2.20E+02 | 7.78E+00  | 5-azacytidine ind 5-azacytidine ind NM_001009811, NM_001009811,NM_014984        |
| 2.20E+02 | 7.78E+00  | 5-azacytidine ind 5-azacytidine ind NM_001009811, NM_001009811,NM_014984        |
| 2.93E+02 | 8.20E+00  | mannose recept mannose recept NM_006039 NM_006039                               |
| 2.67E+02 | 8.06E+00  | insulin-like growt family with sequ NM_001007563 NM_001007563                   |
| 2.67E+02 | 8.06E+00  | insulin-like growt family with sequ NM_001007563 NM_001007563                   |
| 3.74E+02 | 8.55E+00  | mitogen-activate mitogen-activate NM_030662 NM_030662                           |
| 3.44E-03 | -8.18E+00 | EPH receptor A6 ADP-ribosylation NM_173655 NM_173655                            |
| 2.67E+02 | 8.06E+00  | B-cell CLL/lymph B-cell CLL/lymph NM_005178 NM_005178                           |
| 2.67E+02 | 8.06E+00  | B-cell CLL/lymph B-cell CLL/lymph NM_005178 NM_005178                           |
| 3.20E-03 | -8.29E+00 | collectin sub-farr allantoicase NM_199235,NM_199235,NM_024027                   |
| 2.20E+02 | 7.78E+00  | differentially exp differentially exp NM_207514 NM_207514                       |
| 2.20E+02 | 7.78E+00  | differentially exp differentially exp NM_207514 NM_207514                       |
| 3.20E+02 | 8.32E+00  | methyltransferas methyltransferas NM_024086 NM_024086                           |
| 3.20E+02 | 8.32E+00  | methyltransferas methyltransferas NM_024086 NM_024086                           |
| 3.69E-03 | -8.08E+00 | hypothetical LOC odz, odd Oz/ten- NR_027107 NR_027107                           |
| 4.70E-03 | -7.73E+00 | patatin-like phos THAP domain co NM_015723 NM_015723                            |
| 3.98E-03 | -7.97E+00 | adaptor-related $\mu$ laeverin NM_001284 NM_001284                              |
| 4.03E-03 | -7.95E+00 | apratatin and PN apratatin and PN NM_173545 NM_173545                           |
| 2.15E+02 | 7.75E+00  | isthmin 2 homok isthmin 2 homok NM_199296,NM_199296,NM_199265,NM_182            |
| 2.15E+02 | 7.75E+00  | isthmin 2 homok isthmin 2 homok NM_199296,NM_199296,NM_199265,NM_182            |
| 4.38E-03 | -7.83E+00 | acyl-CoA synthet visual system hor NM_032501 NM_032501                          |
| 3.26E+02 | 8.35E+00  | dihydrouridine s <sub>1</sub> dihydrouridine s <sub>1</sub> NM_020175 NM_020175 |
| 3.26E+02 | 8.35E+00  | dihydrouridine s <sub>1</sub> dihydrouridine s <sub>1</sub> NM_020175 NM_020175 |
| 4.45E-03 | -7.81E+00 | ubiquitin-like mo Wilms tumor 1 ir NM_005499 NM_005499                          |
| 4.16E-03 | -7.91E+00 | teratocarcinoma teratocarcinoma NM_003212 NM_003212                             |
| 3.86E-03 | -8.02E+00 | hypothetical LOC family with sequ NR_003291 NR_003291                           |
| 2.39E+02 | 7.90E+00  | zinc finger protei zinc finger protei NM_153813 NM_153813                       |
| 2.39E+02 | 7.90E+00  | zinc finger protei zinc finger protei NM_153813 NM_153813                       |
| 2.70E+02 | 8.08E+00  | plexin D1 transmembrane NM_015103 NM_015103                                     |
| 2.47E+02 | 7.95E+00  | scavenger recept scavenger recept NM_005505,NM_005505,NM_001082959              |
| 2.47E+02 | 7.95E+00  | scavenger recept ubiquitin C NM_005505,NM_005505,NM_001082959                   |
| 2.58E+02 | 8.01E+00  | kelch-like 34 (Drc kelch-like 34 (Drc NM_153270 NM_153270                       |
| 2.58E+02 | 8.01E+00  | kelch-like 34 (Drc kelch-like 34 (Drc NM_153270 NM_153270                       |
| 3.50E+02 | 8.45E+00  | Sp3 transcription Obg-like ATPase NM_003111 NM_003111                           |
| 3.50E+02 | 8.45E+00  | Sp3 transcription Obg-like ATPase NM_003111 NM_003111                           |
| 3.50E+02 | 8.45E+00  | Sp3 transcription Obg-like ATPase NM_003111 NM_003111                           |
| 4.85E-03 | -7.69E+00 | BEN domain con PRP18 pre-mRN/ NM_001100912 NM_001100912                         |
| 3.42E-03 | -8.19E+00 | Cas scaffolding p Cas scaffolding p NM_020356 NM_020356                         |
| 2.40E+02 | 7.91E+00  | phosphatidylinos phosphatidylinos NM_004910,NM_004910,NM_001130848              |
| 2.40E+02 | 7.91E+00  | LFNG O-fucosylp LFNG O-fucosylp NM_001040168, NM_001040168,NM_001040167         |
| 2.40E+02 | 7.91E+00  | LFNG O-fucosylp LFNG O-fucosylp NM_001040168, NM_001040168,NM_001040167         |
| 3.76E+02 | 8.56E+00  | t-complex 10 hor chromosome 6 o NM_004610 NM_004610                             |
| 3.40E+02 | 8.41E+00  | chromosome 9 o chromosome 9 o NM_207511 NM_207511                               |

|          |           |                                   |                     |                                               |              |
|----------|-----------|-----------------------------------|---------------------|-----------------------------------------------|--------------|
| 3.44E-03 | -8.18E+00 | UDP glucuronosy                   | UDP glucuronosy     | NM_019093                                     | NM_019093    |
| 1.36E+00 | 4.48E-01  | nucleoporin 133l                  | ATP-binding cass    | NM_018230                                     | NM_018230    |
| 2.76E+02 | 8.11E+00  | phosphatidylinos phosphodiester   | a                   | NM_001127178,NM_001127178,NM_017733           |              |
| 2.76E+02 | 8.11E+00  | phosphatidylinos phosphodiester   | a                   | NM_001127178,NM_001127178,NM_017733           |              |
| 4.68E-03 | -7.74E+00 | calsequestrin 1 (I                | calsequestrin 1 (I  | NM_001231                                     | NM_001231    |
| 3.30E+02 | 8.37E+00  | transmembrane forkhead box D1     |                     | NM_153217                                     | NM_153217    |
| 3.30E+02 | 8.37E+00  | transmembrane forkhead box D1     |                     | NM_153217                                     | NM_153217    |
| 2.92E+02 | 8.19E+00  | zinc finger protei                | zinc finger protei  | NM_033113                                     | NM_033113    |
| 2.50E+02 | 7.97E+00  | synaptosomal-as                   | synaptosomal-as     | NM_053052                                     | NM_053052    |
| 2.46E+02 | 7.94E+00  | zinc finger, DHH                  | zinc finger, DHH    | NM_024786                                     | NM_024786    |
| 2.72E+02 | 8.09E+00  | FLJ43860 protein                  | FLJ43860 proteir    | NM_207414                                     | NM_207414    |
| 2.72E+02 | 8.09E+00  | FLJ43860 protein                  | FLJ43860 proteir    | NM_207414                                     | NM_207414    |
| 2.72E+02 | 8.09E+00  | FLJ43860 protein non-protein codi |                     | NM_207414                                     | NM_207414    |
| 2.99E+02 | 8.22E+00  | hypothetical LOC                  | hypothetical LOC    | NR_026664                                     | NR_026664    |
| 2.99E+02 | 8.22E+00  | hypothetical LOC                  | hypothetical LOC    | NR_026664                                     | NR_026664    |
| 4.12E-03 | -7.92E+00 | Rap guanine nucl                  | Rap guanine nucl    | NM_005312,NM_005312,NM_198679                 |              |
| 3.21E+02 | 8.33E+00  | UDP-N-acetyl-alç                  | UDP-N-acetyl-alç    | NM_021808,NM_021808,NM_001122636              |              |
| 3.21E+02 | 8.33E+00  | UDP-N-acetyl-alç                  | UDP-N-acetyl-alç    | NM_021808,NM_021808,NM_001122636              |              |
| 2.98E+02 | 8.22E+00  | transmembrane                     | transmembrane       | NM_001097620                                  | NM_001097620 |
| 2.98E+02 | 8.22E+00  | transmembrane                     | transmembrane       | NM_001097620                                  | NM_001097620 |
| 2.98E+02 | 8.22E+00  | transmembrane                     | transmembrane       | NM_001097620                                  | NM_001097620 |
| 5.22E+02 | 9.03E+00  | adenosine deami                   | adenosine deami     | NM_018702                                     | NM_018702    |
| 3.48E-03 | -8.17E+00 | tripartite motif-c                | tripartite motif-c  | NM_033342                                     | NM_033342    |
| 3.48E-03 | -8.17E+00 | tripartite motif-c                | tripartite motif-c  | NM_033342                                     | NM_033342    |
| 3.34E-03 | -8.22E+00 | chromosome 14                     | chromosome 14       | NM_001010860                                  | NM_001010860 |
| 3.08E+02 | 8.27E+00  | spermatogenesis                   | spermatogenesis     | NM_001101677,NM_001101677,NM_001012415        |              |
| 3.52E+02 | 8.46E+00  | Zic family membi                  | propionyl CoA ca    | NM_007129                                     | NM_007129    |
| 3.51E-03 | -8.15E+00 | transmembrane                     | protein tyrosine    | NM_001079809                                  | NM_001079809 |
| 2.49E+02 | 7.96E+00  | active BCR-relate                 | active BCR-relate   | NM_001159746                                  | NM_001159746 |
| 2.60E+02 | 8.02E+00  | beta-1,4-N-acety                  | plakophilin 3       | NM_178537                                     | NM_178537    |
| 2.60E+02 | 8.02E+00  | beta-1,4-N-acety                  | plakophilin 3       | NM_178537                                     | NM_178537    |
| 2.60E+02 | 8.02E+00  | beta-1,4-N-acety                  | plakophilin 3       | NM_178537                                     | NM_178537    |
| 3.93E-03 | -7.99E+00 | UDP-galactose-4                   | 3-hydroxymethyl     | NM_001127621,NM_001127621,NM_000403,NM_000403 |              |
| 3.93E-03 | -7.99E+00 | 3-hydroxymethyl                   | 3-hydroxymethyl     | NM_000191                                     | NM_000191    |
| 3.81E+02 | 8.57E+00  | core-binding fact                 | core-binding fact   | NM_175931,NM_175931,NM_005187                 |              |
| 3.81E+02 | 8.57E+00  | core-binding fact                 | acyl-CoA synthet    | NM_175931,NM_175931,NM_005187                 |              |
| 3.81E+02 | 8.57E+00  | core-binding fact                 | acyl-CoA synthet    | NM_175931,NM_175931,NM_005187                 |              |
| 2.98E+02 | 8.22E+00  | PTK6 protein tyr                  | src-related kinası  | NM_005975                                     | NM_005975    |
| 2.75E+02 | 8.10E+00  | interferon regula                 | similar to hCG16    | NM_002163                                     | NM_002163    |
| 2.75E+02 | 8.10E+00  | interferon regula                 | similar to hCG16    | NM_002163                                     | NM_002163    |
| 2.99E+02 | 8.22E+00  | chromosome 6 o                    | chromosome 6 o      | NR_027005                                     | NR_027005    |
| 2.99E+02 | 8.22E+00  | chromosome 6 o                    | chromosome 6 o      | NR_027005                                     | NR_027005    |
| 2.90E+02 | 8.18E+00  | XK, Kell blood gr                 | XK, Kell blood gr   | NM_001011718                                  | NM_001011718 |
| 2.90E+02 | 8.18E+00  | XK, Kell blood gr                 | XK, Kell blood gr   | NM_001011718                                  | NM_001011718 |
| 3.97E-03 | -7.98E+00 | signal peptide, Cl                | metallophospho      | NM_173050                                     | NM_173050    |
| 3.97E-03 | -7.98E+00 | signal peptide, Cl                | metallophospho      | NM_173050                                     | NM_173050    |
| 2.30E+02 | 7.85E+00  | hypothetical pro                  | forkhead box D4     | NR_024443                                     | NR_024443    |
| 2.30E+02 | 7.85E+00  | hypothetical pro                  | forkhead box D4     | NR_024443                                     | NR_024443    |
| 2.30E+02 | 7.85E+00  | hypothetical pro                  | forkhead box D4     | NR_024443                                     | NR_024443    |
| 3.05E+02 | 8.25E+00  | sorting nexin 3                   | lactation elevate   | NM_152827,NM_152827,NM_003795                 |              |
| 3.53E+02 | 8.46E+00  | tetratricopeptide                 | tetratricopeptide   | NM_017931                                     | NM_017931    |
| 3.95E-03 | -7.98E+00 | leucine rich repe                 | fermitin family r   | NM_152611                                     | NM_152611    |
| 3.60E+02 | 8.49E+00  | alkaline phospho                  | alkaline phospho    | NM_031313                                     | NM_031313    |
| 2.75E+02 | 8.10E+00  | pregnancy specif                  | pregnancy specif    | NM_002783                                     | NM_002783    |
| 3.59E-03 | -8.12E+00 | transmembrane                     | transmembrane       | NM_206832                                     | NM_206832    |
| 3.59E-03 | -8.12E+00 | transmembrane                     | carboxypeptidası    | NM_206832                                     | NM_206832    |
| 3.71E+02 | 8.54E+00  | cell division cycle               | cell division cycle | NM_007065                                     | NM_007065    |
| 3.71E+02 | 8.54E+00  | cell division cycle               | cell division cycle | NM_007065                                     | NM_007065    |

|          |           |                                         |                                           |                                           |
|----------|-----------|-----------------------------------------|-------------------------------------------|-------------------------------------------|
| 3.71E+02 | 8.54E+00  | cell division cycle cell division cycle | NM_007065                                 | NM_007065                                 |
| 2.54E+02 | 7.99E+00  | chromosome 16 chromosome 16             | NM_182563                                 | NM_182563                                 |
| 2.54E+02 | 7.99E+00  | chromosome 16 chromosome 16             | NM_182563                                 | NM_182563                                 |
| 2.54E+02 | 7.99E+00  | chromosome 16 chromosome 16             | NM_182563                                 | NM_182563                                 |
| 2.69E+02 | 8.07E+00  | acetylserotonin ( acetylserotonin (     | NM_004043                                 | NM_004043                                 |
| 2.69E+02 | 8.07E+00  | acetylserotonin ( acetylserotonin (     | NM_004043                                 | NM_004043                                 |
| 2.24E+02 | 7.81E+00  | runt-related tran runt-related tran     | NM_004350,NM_004350,NM_001031680          | NM_004350,NM_004350,NM_001031680          |
| 2.24E+02 | 7.81E+00  | runt-related tran runt-related tran     | NM_004350,NM_004350,NM_001031680          | NM_004350,NM_004350,NM_001031680          |
| 2.66E+02 | 8.05E+00  | chromosome 10 placenta-specific         | NM_025125                                 | NM_025125                                 |
| 2.83E+02 | 8.14E+00  | lysine (K)-specific lysine (K)-specific | NM_015015                                 | NM_015015                                 |
| 3.64E-03 | -8.10E+00 | leucine rich repe leucine rich repe     | NM_024750,NM_024750,NM_024512             | NM_024750,NM_024750,NM_024512             |
| 3.10E+02 | 8.27E+00  | mitochondrial rik solute carrier fan    | NM_002949                                 | NM_002949                                 |
| 2.73E+02 | 8.09E+00  | notch 1 notch 1                         | NM_017617                                 | NM_017617                                 |
| 2.73E+02 | 8.09E+00  | notch 1 notch 1                         | NM_017617                                 | NM_017617                                 |
| 2.74E+02 | 8.10E+00  | chromobox hom chromobox hom             | NM_020649                                 | NM_020649                                 |
| 4.13E-03 | -7.92E+00 | complement con disabled homolo          | NM_001737                                 | NM_001737                                 |
| 3.18E+02 | 8.31E+00  | NLR family meml NLR family meml         | NM_170722,NM_170722,NM_024618             | NM_170722,NM_170722,NM_024618             |
| 3.49E+02 | 8.45E+00  | solute carrier fan matrix metallope     | NM_001110781                              | NM_001110781                              |
| 3.49E+02 | 8.45E+00  | matrix metallope matrix metallope       | NR_002946                                 | NR_002946                                 |
| 3.15E-03 | -8.31E+00 | hypothetical LOC LIM domain cont        | NR_024413                                 | NR_024413                                 |
| 2.12E+02 | 7.73E+00  | docking protein 7 low density lipop     | NM_173660                                 | NM_173660                                 |
| 2.12E+02 | 7.73E+00  | docking protein 7 low density lipop     | NM_173660                                 | NM_173660                                 |
| 2.51E+02 | 7.97E+00  | tripartite motif-c tripartite motif-c   | NM_171982                                 | NM_171982                                 |
| 4.38E+02 | 8.78E+00  | active BCR-relate active BCR-relate     | NM_001159746                              | NM_001159746                              |
| 4.09E-03 | -7.93E+00 | chromosome 1 o TAR DNA binding          | NM_173507                                 | NM_173507                                 |
| 3.30E+02 | 8.37E+00  | adenosine deami adenosine deami         | NM_001145407, NM_001145407,NM_001033049,N | NM_001145407, NM_001145407,NM_001033049,N |
| 3.30E+02 | 8.37E+00  | adenosine deami adenosine deami         | NM_001145407, NM_001145407,NM_001033049,N | NM_001145407, NM_001145407,NM_001033049,N |
| 2.34E+02 | 7.87E+00  | ring finger protei family with sequi    | NM_002938                                 | NM_002938                                 |
| 2.43E+02 | 7.92E+00  | TP53 target 3 ubiquitin-conjug;         | NM_016212                                 | NM_016212                                 |
| 4.24E-03 | -7.88E+00 | chemokine (C-X-1 RUN and FYVE d         | NR_002712                                 | NR_002712                                 |
| 4.24E-03 | -7.88E+00 | chemokine (C-X-1 RUN and FYVE d         | NR_002712                                 | NR_002712                                 |
| 4.54E+02 | 8.83E+00  | WD repeat domæ zinc finger, MYNI        | NM_138778                                 | NM_138778                                 |
| 4.10E+02 | 8.68E+00  | heparan sulfate 7 heparan sulfate 7     | NM_005529                                 | NM_005529                                 |
| 4.10E+02 | 8.68E+00  | heparan sulfate 7 heparan sulfate 7     | NM_005529                                 | NM_005529                                 |
| 3.43E+02 | 8.42E+00  | paternally expre paternally expre       | NM_015068,NM_015068,NM_001040152          | NM_015068,NM_015068,NM_001040152          |
| 2.69E+02 | 8.07E+00  | PR domain conta PR domain conta         | NM_020229                                 | NM_020229                                 |
| 2.69E+02 | 8.07E+00  | PR domain conta PR domain conta         | NM_020229                                 | NM_020229                                 |
| 3.43E+02 | 8.42E+00  | protein tyrosine protein tyrosine       | NM_080549,NM_080549,NM_002831             | NM_080549,NM_080549,NM_002831             |
| 1.68E+00 | 7.50E-01  | asparagine-linker transient receptc     | NR_024248                                 | NR_024248                                 |
| 1.68E+00 | 7.50E-01  | asparagine-linker transient receptc     | NR_024248                                 | NR_024248                                 |
| 2.26E+02 | 7.82E+00  | ankyrin repeat ar ATP-binding cass      | NM_080871,NM_080871,NM_001142459,NM_      | NM_080871,NM_080871,NM_001142459,NM_      |
| 2.23E+02 | 7.80E+00  | EGF-like-domain, EGF-like-domain,       | NM_016215                                 | NM_016215                                 |
| 2.60E+02 | 8.02E+00  | lectin, mannose- regulator of G-pr      | NM_006816                                 | NM_006816                                 |
| 2.60E+02 | 8.02E+00  | lectin, mannose- regulator of G-pr      | NM_006816                                 | NM_006816                                 |
| 3.19E-03 | -8.29E+00 | Rho guanine nuc Rho guanine nuc         | NM_001128615, NM_001128615,NM_019555,NM_  | NM_001128615, NM_001128615,NM_019555,NM_  |
| 3.19E-03 | -8.29E+00 | Rho guanine nuc Rho guanine nuc         | NM_001128615, NM_001128615,NM_019555,NM_  | NM_001128615, NM_001128615,NM_019555,NM_  |
| 3.77E-03 | -8.05E+00 | transmembrane telomeric repeat          | NM_144676                                 | NM_144676                                 |
| 2.81E+02 | 8.13E+00  | chromosome 2 o WD repeat domæ           | NM_001145054                              | NM_001145054                              |
| 4.18E-03 | -7.90E+00 | keratin associate keratin associate     | NM_175858                                 | NM_175858                                 |
| 3.48E+02 | 8.44E+00  | hypothetical LOC hypothetical LOC       | NR_015434                                 | NR_015434                                 |
| 3.74E+02 | 8.55E+00  | glutamic-oxaloac NK2 transcriptior      | NM_002079                                 | NM_002079                                 |
| 2.84E+02 | 8.15E+00  | ArfGAP with SH3 ArfGAP with SH3         | NM_017707,NM_017707,NM_001143778          | NM_017707,NM_017707,NM_001143778          |
| 2.84E+02 | 8.15E+00  | ArfGAP with SH3 ArfGAP with SH3         | NM_017707,NM_017707,NM_001143778          | NM_017707,NM_017707,NM_001143778          |
| 3.19E+02 | 8.32E+00  | protein disulfide protein disulfide     | NM_006849                                 | NM_006849                                 |
| 3.19E+02 | 8.32E+00  | protein disulfide protein disulfide     | NM_006849                                 | NM_006849                                 |
| 2.77E+02 | 8.11E+00  | zinc finger protei zinc finger protei   | NR_003952                                 | NR_003952                                 |
| 2.77E+02 | 8.11E+00  | zinc finger protei zinc finger protei   | NR_003952                                 | NR_003952                                 |
| 3.61E-03 | -8.11E+00 | dual specificity p interferon regula    | NM_020185                                 | NM_020185                                 |

|          |           |                                       |                                               |              |
|----------|-----------|---------------------------------------|-----------------------------------------------|--------------|
| 3.59E+02 | 8.49E+00  | pentraxin 4, long pentraxin 4, long   | NM_001013658                                  | NM_001013658 |
| 3.99E-03 | -7.97E+00 | scaffold attachm scaffold attachm     | NM_014649                                     | NM_014649    |
| 2.43E+02 | 7.92E+00  | glioma tumor suj glioma tumor suj     | NM_015711                                     | NM_015711    |
| 2.43E+02 | 7.92E+00  | glioma tumor suj glioma tumor suj     | NM_015711                                     | NM_015711    |
| 2.90E+02 | 8.18E+00  | paralemmin paralemmin                 | NM_001040134, NM_001040134, NM_002579         |              |
| 2.90E+02 | 8.18E+00  | paralemmin paralemmin                 | NM_001040134, NM_001040134, NM_002579         |              |
| 3.41E+02 | 8.41E+00  | kazrin kazrin                         | NM_001018000                                  | NM_001018000 |
| 3.41E+02 | 8.41E+00  | kazrin kazrin                         | NM_001018001                                  | NM_001018001 |
| 4.59E-03 | -7.77E+00 | tandem C2 domæ fibulin 5              | NM_152332, NM_152332, NM_001128595, NM_002522 | NM_002522    |
| 2.97E+02 | 8.22E+00  | neuronal pentra> neuronal pentra>     | NM_002522                                     | NM_002522    |
| 5.00E-03 | -7.64E+00 | T-cell leukemia/l T-cell leukemia/l   | NM_012468, NM_012468, NM_020552, NM_014       |              |
| 3.52E+02 | 8.46E+00  | pentatricopeptid zinc finger protei   | NM_024754                                     | NM_024754    |
| 3.52E+02 | 8.46E+00  | pentatricopeptid zinc finger protei   | NM_024754                                     | NM_024754    |
| 3.52E+02 | 8.46E+00  | pentatricopeptid zinc finger protei   | NM_024754                                     | NM_024754    |
| 2.99E+02 | 8.22E+00  | F-box and leucin F-box and leucin     | NM_024963                                     | NM_024963    |
| 2.62E+02 | 8.03E+00  | BAH domain and BAH domain and         | NM_001080519                                  | NM_001080519 |
| 2.62E+02 | 8.03E+00  | BAH domain and BAH domain and         | NM_001080519                                  | NM_001080519 |
| 2.63E+02 | 8.04E+00  | zinc finger protei integrator compl   | NM_152626, NM_152626, NM_007139               |              |
| 2.63E+02 | 8.04E+00  | zinc finger protei integrator compl   | NM_152626, NM_152626, NM_007139               |              |
| 2.63E+02 | 8.04E+00  | zinc finger protei integrator compl   | NM_152626, NM_152626, NM_007139               |              |
| 2.64E+02 | 8.04E+00  | Rho GTPase activ Rho GTPase activ     | NM_014882                                     | NM_014882    |
| 2.73E+02 | 8.09E+00  | latent transformi latent transformi   | NM_001042544                                  | NM_001042544 |
| 2.73E+02 | 8.09E+00  | latent transformi latent transformi   | NM_001042544                                  | NM_001042544 |
| 3.57E-03 | -8.13E+00 | otoancorin otoancorin                 | NM_144672                                     | NM_144672    |
| 3.46E+02 | 8.43E+00  | ATP-binding cass ATP-binding cass     | NM_019112                                     | NM_019112    |
| 3.46E+02 | 8.43E+00  | ATP-binding cass ATP-binding cass     | NM_019112                                     | NM_019112    |
| 3.46E+02 | 8.43E+00  | ATP-binding cass ATP-binding cass     | NM_019112                                     | NM_019112    |
| 3.18E+02 | 8.31E+00  | brain-specific anç brain-specific anç | NM_001702                                     | NM_001702    |
| 3.18E+02 | 8.31E+00  | brain-specific anç brain-specific anç | NM_001702                                     | NM_001702    |
| 2.59E+02 | 8.02E+00  | calcium homeost calcium homeost       | NM_006387                                     | NM_006387    |
| 2.59E+02 | 8.02E+00  | calcium homeost calcium homeost       | NM_006387                                     | NM_006387    |
| 2.45E+02 | 7.94E+00  | glutamate recept high mobility gro    | NM_000841                                     | NM_000841    |
| 5.15E-03 | -7.60E+00 | DNA (cytosine-5- dystrobrevin, bei    | NM_175630                                     | NM_175630    |
| 2.59E+02 | 8.02E+00  | BEN domain con mannose-bindingç       | NR_027512                                     | NR_027512    |
| 2.56E+02 | 8.00E+00  | bicaudal D homo bicaudal D homo       | NM_001003800, NM_001003800, NM_015250         |              |
| 2.56E+02 | 8.00E+00  | bicaudal D homo bicaudal D homo       | NM_001003800, NM_001003800, NM_015250         |              |
| 3.59E+02 | 8.49E+00  | SMAD family me SMAD family me         | NM_001145103                                  | NM_001145103 |
| 2.53E+02 | 7.98E+00  | chromatin licensi chromatin licensi   | NM_030928                                     | NM_030928    |
| 2.53E+02 | 7.98E+00  | chromatin licensi chromatin licensi   | NM_030928                                     | NM_030928    |
| 2.72E+02 | 8.09E+00  | G protein-couple G protein-couple     | NM_001508                                     | NM_001508    |
| 5.20E-03 | -7.59E+00 | spastic paraplegi cyclin A1           | NM_015087, NM_015087, NM_001142296, NM_016212 | NM_016212    |
| 2.54E+02 | 7.99E+00  | TP53 target 3 ubiquitin-conjug:       | NM_016212                                     | NM_016212    |
| 2.54E+02 | 7.99E+00  | TP53 target 3 ubiquitin-conjug:       | NM_016212                                     | NM_016212    |
| 4.35E-03 | -7.84E+00 | troponin T type ð mitochondrial rit   | NM_001042781, NM_001042781, NM_001042782, N   |              |
| 2.31E+02 | 7.85E+00  | t-SNARE domain brain-specific anç     | NM_145003                                     | NM_145003    |
| 4.32E-03 | -7.86E+00 | chromosome 9 o chromosome 9 o         | NM_032307                                     | NM_032307    |
| 5.34E-03 | -7.55E+00 | adenosine deami adenosine deami       | NM_001012969, NM_001012969, NM_001159280      |              |
| 3.66E+02 | 8.51E+00  | zinc finger, DHH(zinc finger, DHH)    | NM_013373                                     | NM_013373    |
| 3.66E+02 | 8.51E+00  | zinc finger, DHH(zinc finger, DHH)    | NM_013373                                     | NM_013373    |
| 3.66E+02 | 8.51E+00  | zinc finger, DHH(zinc finger, DHH)    | NM_013373                                     | NM_013373    |
| 5.06E-03 | -7.63E+00 | ATG4 autophagy forkhead box D3        | NM_178221, NM_178221, NM_032852               |              |
| 2.31E+02 | 7.85E+00  | nicalin homolog nicalin homolog       | NM_020170                                     | NM_020170    |
| 3.12E+02 | 8.29E+00  | zinc finger protei zinc finger protei | NM_018555                                     | NM_018555    |
| 2.68E+02 | 8.06E+00  | forkhead box F2 forkhead box C1       | NM_001452                                     | NM_001452    |
| 2.68E+02 | 8.06E+00  | forkhead box F2 forkhead box C1       | NM_001452                                     | NM_001452    |
| 4.25E-03 | -7.88E+00 | GRIP and coiled-ç ADP-ribosylation    | NM_024523                                     | NM_024523    |
| 4.98E-03 | -7.65E+00 | transglutaminase transglutaminase     | NM_003245                                     | NM_003245    |
| 3.84E+02 | 8.58E+00  | CAP-GLY domain CAP-GLY domain         | NM_032421, NM_032421, NM_003388               |              |



|          |           |                                                                             |
|----------|-----------|-----------------------------------------------------------------------------|
| 3.84E+02 | 8.58E+00  | CAP-GLY domain CAP-GLY domain NM_032421,NM_032421,NM_003388                 |
| 4.11E-03 | -7.93E+00 | secretory carrier secretory carrier NM_052837 NM_052837                     |
| 3.42E-03 | -8.19E+00 | tetraspanin 3 NKFB kinase fam NM_005724,NM_005724,NM_198902                 |
| 4.03E+02 | 8.65E+00  | ADAMTS-like 4 ADAMTS-like 4 NM_025008,NM_025008,NM_019032                   |
| 4.03E+02 | 8.65E+00  | ADAMTS-like 4 ADAMTS-like 4 NM_025008,NM_025008,NM_019032                   |
| 3.54E+02 | 8.47E+00  | phospholipase C, phospholipase C, NM_014638 NM_014638                       |
| 4.13E-03 | -7.92E+00 | protein kinase C, Scm-like with fou NM_006257 NM_006257                     |
| 4.13E-03 | -7.92E+00 | protein kinase C, Scm-like with fou NM_006257 NM_006257                     |
| 4.74E-03 | -7.72E+00 | chromosome 6 o chromosome 6 o NM_001085401 NM_001085401                     |
| 3.57E+02 | 8.48E+00  | chromosome 16 chromosome 16 NM_001080524 NM_001080524                       |
| 3.57E+02 | 8.48E+00  | chromosome 16 clusterin associat NM_001080524 NM_001080524                  |
| 4.47E-03 | -7.81E+00 | solute carrier fan acyl-CoA dehydr NM_152697 NM_152697                      |
| 2.79E+02 | 8.12E+00  | transforming gro B9 protein doma NM_000660 NM_000660                        |
| 2.79E+02 | 8.12E+00  | B9 protein doma B9 protein doma NM_030578 NM_030578                         |
| 2.87E+02 | 8.16E+00  | desmin SPEG complex lo NM_001927 NM_001927                                  |
| 2.64E+02 | 8.04E+00  | tRNA methyltran tRNA methyltran NM_152307 NM_152307                         |
| 2.64E+02 | 8.04E+00  | tRNA methyltran tRNA methyltran NM_152307 NM_152307                         |
| 2.63E+02 | 8.04E+00  | histone deacetyl; histone deacetyl; NM_006037 NM_006037                     |
| 3.62E-03 | -8.11E+00 | interleukin 17F interleukin 17F NM_052872 NM_052872                         |
| 3.62E-03 | -8.11E+00 | interleukin 17F interleukin 17F NM_052872 NM_052872                         |
| 2.72E+02 | 8.09E+00  | G-protein signalii G-protein signalii NM_001145638, NM_001145638,NM_015597  |
| 3.22E+02 | 8.33E+00  | single stranded C acyl-CoA thioeste NM_018070,NM_018070,NM_145716,NM_001    |
| 3.79E-03 | -8.04E+00 | ubiquitin specific UDP glucuronosy NM_018218 NM_018218                      |
| 3.79E-03 | -8.04E+00 | UDP glucuronosy UDP glucuronosy NM_019076 NM_019076                         |
| 4.72E-03 | -7.73E+00 | coiled-coil and C: coiled-coil and C: NM_001080522, NM_001080522,NR_024098  |
| 2.13E+02 | 7.74E+00  | zinc finger, MYM zinc finger, MYM NM_001039650, NM_001039650,NM_001039649   |
| 3.80E-03 | -8.04E+00 | leucine zipper, d non-protein codi NM_032287 NM_032287                      |
| 3.80E-03 | -8.04E+00 | non-protein codi non-protein codi NM_001012986 NM_001012986                 |
| 3.71E+02 | 8.54E+00  | guanine nucleoti guanine nucleoti NM_002067 NM_002067                       |
| 3.89E-03 | -8.01E+00 | ankyrin repeat d Rho guanine nuc NM_017664 NM_017664                        |
| 2.67E+02 | 8.06E+00  | transmembrane KIAA0125 NM_025268 NM_025268                                  |
| 3.68E-03 | -8.09E+00 | dipeptidyl-peptic dipeptidyl-peptic NM_130797 NM_130797                     |
| 3.68E-03 | -8.09E+00 | dipeptidyl-peptic dipeptidyl-peptic NM_130797 NM_130797                     |
| 3.68E-03 | -8.09E+00 | dipeptidyl-peptic dipeptidyl-peptic NM_130797 NM_130797                     |
| 3.03E+02 | 8.24E+00  | zinc finger and B' zinc finger and B' NM_025224 NM_025224                   |
| 2.70E+02 | 8.07E+00  | myeloid/lymphoi myeloid/lymphoi NM_005934 NM_005934                         |
| 2.70E+02 | 8.07E+00  | myeloid/lymphoi myeloid/lymphoi NM_005934 NM_005934                         |
| 3.85E-03 | -8.02E+00 | serine/threonine solute carrier fan NM_052902 NM_052902                     |
| 2.72E+02 | 8.09E+00  | chromosome 9 o chromosome 9 o NM_152833 NM_152833                           |
| 2.72E+02 | 8.09E+00  | chromosome 9 o chromosome 9 o NM_152833 NM_152833                           |
| 4.25E-03 | -7.88E+00 | KIAA1529 KIAA1529 NM_020893 NM_020893                                       |
| 3.72E+02 | 8.54E+00  | protamine 2 protamine 2 NM_002762 NM_002762                                 |
| 3.18E+02 | 8.31E+00  | CREB regulated t CREB regulated t NM_001098482, NM_001098482,NM_015321      |
| 3.18E+02 | 8.31E+00  | CREB regulated t CREB regulated t NM_001098482, NM_001098482,NM_015321      |
| 3.18E+02 | 8.31E+00  | CREB regulated t CREB regulated t NM_001098482, NM_001098482,NM_015321      |
| 2.61E+02 | 8.03E+00  | mannosyl (alpha- mannosyl (alpha- NM_001114617, NM_001114617,NM_001114618,N |
| 2.61E+02 | 8.03E+00  | mannosyl (alpha- mannosyl (alpha- NM_001114617, NM_001114617,NM_001114618,N |
| 4.42E-03 | -7.82E+00 | glycerol kinase 5 5'-3' exoribonucl NM_001039547 NM_001039547               |
| 3.68E+02 | 8.52E+00  | solute carrier fan solute carrier fan NM_001636 NM_001636                   |
| 3.50E-03 | -8.16E+00 | transient recept sedoheptulokina NM_080706,NM_080706,NM_080705,NM_018       |
| 3.04E+02 | 8.25E+00  | ligase I, DNA, ATI caspase recruitm NM_000234 NM_000234                     |
| 3.04E+02 | 8.25E+00  | ligase I, DNA, ATI caspase recruitm NM_000234 NM_000234                     |
| 3.14E-03 | -8.32E+00 | family with sequi torsin family 3, n NM_014864 NM_014864                    |
| 3.05E+02 | 8.25E+00  | hypothetical LOC inhibitor of DNA NR_015405 NR_015405                       |
| 4.21E-03 | -7.89E+00 | cripto, FRL-1, cry chromosome 2 o NM_001079530 NM_001079530                 |
| 4.21E-03 | -7.89E+00 | cripto, FRL-1, cry chromosome 2 o NM_001079530 NM_001079530                 |
| 2.67E+02 | 8.06E+00  | stimulated by ret stimulated by ret NM_001142620 NM_001142620               |
| 4.25E-03 | -7.88E+00 | cholesterol 25-h) lipase A, lysosom NM_003956 NM_003956                     |

|          |           |                    |                    |                                                             |              |
|----------|-----------|--------------------|--------------------|-------------------------------------------------------------|--------------|
| 3.12E+02 | 8.29E+00  | chromosome 4 o     | chromosome 4 o     | NM_152770                                                   | NM_152770    |
| 3.12E+02 | 8.29E+00  | chromosome 4 o     | chromosome 4 o     | NM_152770                                                   | NM_152770    |
| 1.24E+00 | 3.06E-01  | protein tyrosine   | protein tyrosine   | NM_130842,NM_130842,NM_130843,NM_002                        |              |
| 1.24E+00 | 3.06E-01  | protein tyrosine   | protein tyrosine   | NM_130842,NM_130842,NM_130843,NM_002                        |              |
| 2.82E+02 | 8.14E+00  | agrln              | chromosome 1 o     | NM_198576                                                   | NM_198576    |
| 2.82E+02 | 8.14E+00  | agrln              | chromosome 1 o     | NM_198576                                                   | NM_198576    |
| 2.32E+02 | 7.86E+00  | pleckstrln homol   | pleckstrln homol   | NM_001144759, NM_001144759, NM_001144758                    |              |
| 2.82E+02 | 8.14E+00  | pleckstrln homol   | pleckstrln homol   | NM_052909                                                   | NM_052909    |
| 3.15E+02 | 8.30E+00  | SVOP-like          | SVOP-like          | NM_001139456, NM_001139456, NM_174959                       |              |
| 4.85E-03 | -7.69E+00 | chromosome 14      | olfactory receptc  | NM_001146683                                                | NM_001146683 |
| 2.65E+02 | 8.05E+00  | mucin 6, oligomε   | mucin 2, oligomε   | NM_005961                                                   | NM_005961    |
| 2.65E+02 | 8.05E+00  | mucin 6, oligomε   | mucin 2, oligomε   | NM_005961                                                   | NM_005961    |
| 3.43E+02 | 8.42E+00  | paralemmin         | paralemmin         | NM_001040134, NM_001040134, NM_002579                       |              |
| 3.43E+02 | 8.42E+00  | paralemmin         | paralemmin         | NM_001040134, NM_001040134, NM_002579                       |              |
| 4.47E+02 | 8.80E+00  | ST6 (alpha-N-ace   | ST6 (alpha-N-ace   | NM_175040, NM_175040, NM_175039                             |              |
| 4.47E+02 | 8.80E+00  | ST6 (alpha-N-ace   | ST6 (alpha-N-ace   | NM_175040, NM_175040, NM_175039                             |              |
| 3.81E+02 | 8.57E+00  | ---                | C-terminal bindir  | NR_024569                                                   | NR_024569    |
| 3.69E-03 | -8.08E+00 | syntrophln, gamr   | thyroid peroxida   | NM_018968                                                   | NM_018968    |
| 2.65E+02 | 8.05E+00  | activln A recepto  | activln A recepto  | NM_001111031, NM_001111031, NM_145259, NM_145259, NM_022114 |              |
| 3.61E+02 | 8.50E+00  | PR domain conta    | PR domain conta    | NM_199454, NM_199454, NM_022114                             |              |
| 3.46E-03 | -8.17E+00 | paraoxonase 3      | paraoxonase 2      | NM_000940                                                   | NM_000940    |
| 3.86E+02 | 8.59E+00  | histone deacetyl   | ES cell expressed  | NM_006044                                                   | NM_006044    |
| 3.86E+02 | 8.59E+00  | histone deacetyl   | ES cell expressed  | NM_006044                                                   | NM_006044    |
| 4.90E-03 | -7.67E+00 | hypothetical LOC   | hypothetical LOC   | NR_024172, NR_024172, NR_024173                             |              |
| 2.90E+02 | 8.18E+00  | thromboxane A2     | chromosome 19      | NM_001060, NM_001060, NM_201636                             |              |
| 4.43E-03 | -7.82E+00 | chromosome 5 o     | chromosome 5 o     | NM_001001343                                                | NM_001001343 |
| 4.43E-03 | -7.82E+00 | chromosome 5 o     | chromosome 5 o     | NM_001001343                                                | NM_001001343 |
| 2.33E+02 | 7.87E+00  | XPA binding prot   | XPA binding prot   | NM_020196                                                   | NM_020196    |
| 2.33E+02 | 7.87E+00  | XPA binding prot   | XPA binding prot   | NM_020196                                                   | NM_020196    |
| 4.02E-03 | -7.96E+00 | neuronatln         | catenln, beta like | NM_005386, NM_005386, NM_181689                             |              |
| 4.02E-03 | -7.96E+00 | neuronatln         | catenln, beta like | NM_005386, NM_005386, NM_181689                             |              |
| 4.55E-03 | -7.78E+00 | vezatln, adheren   | methionyl amino    | NM_017599                                                   | NM_017599    |
| 3.51E+02 | 8.46E+00  | sialic acid bindiņ | sialic acid bindiņ | NM_003830                                                   | NM_003830    |
| 3.41E-03 | -8.20E+00 | chromosome 10      | chromosome 10      | NM_001010896                                                | NM_001010896 |
| 3.42E-03 | -8.19E+00 | origin recognitiō  | lipoma HMGIC fu    | NM_181747                                                   | NM_181747    |
| 3.42E-03 | -8.19E+00 | origin recognitiō  | lipoma HMGIC fu    | NM_181747                                                   | NM_181747    |
| 2.62E-03 | -8.58E+00 | eukaryotic transl  | ribose 5-phosphz   | NM_004836                                                   | NM_004836    |
| 2.32E+02 | 7.86E+00  | pleckstrln homol   | pleckstrln homol   | NM_001144759, NM_001144759, NM_001144758                    |              |
| 2.32E+02 | 7.86E+00  | pleckstrln homol   | pleckstrln homol   | NM_001144759, NM_001144759, NM_001144758                    |              |
| 2.84E+02 | 8.15E+00  | KIAA0467           | KIAA0467           | NM_015284                                                   | NM_015284    |
| 2.62E+02 | 8.03E+00  | uridine-cytidine   | uridine-cytidine   | NM_017859                                                   | NM_017859    |
| 2.62E+02 | 8.03E+00  | uridine-cytidine   | uridine-cytidine   | NM_017859                                                   | NM_017859    |
| 2.62E+02 | 8.03E+00  | uridine-cytidine   | uridine-cytidine   | NM_017859                                                   | NM_017859    |
| 3.25E+02 | 8.34E+00  | sal-like 3 (Drosoņ | sal-like 3 (Drosoņ | NM_171999                                                   | NM_171999    |
| 3.25E+02 | 8.34E+00  | sal-like 3 (Drosoņ | sal-like 3 (Drosoņ | NM_171999                                                   | NM_171999    |
| 3.70E-03 | -8.08E+00 | hypothetical pro   | hypothetical pro   | NR_027073                                                   | NR_027073    |
| 3.86E-03 | -8.02E+00 | glutamate recept   | chromosome 3 o     | NM_001080423                                                | NM_001080423 |
| 4.85E-03 | -7.69E+00 | ADP-ribosylation   | protein kinase C   | NM_001142293, NM_001142293, NM_014570                       |              |
| 3.40E+02 | 8.41E+00  | phospholipase C,   | chromosome 15      | NM_004573                                                   | NM_004573    |
| 3.04E+02 | 8.25E+00  | tryptase gamma     | tryptase gamma     | NM_012467                                                   | NM_012467    |
| 3.04E+02 | 8.25E+00  | tryptase gamma     | tryptase beta 2 (i | NM_012467                                                   | NM_012467    |
| 3.08E+02 | 8.27E+00  | zinc finger, DHH   | hypothetical LOC   | NM_013373                                                   | NM_013373    |
| 3.08E+02 | 8.27E+00  | zinc finger, DHH   | hypothetical LOC   | NM_013373                                                   | NM_013373    |
| 3.35E+02 | 8.39E+00  | PHD finger prote   | cAMP responsive    | NM_001101802, NM_001101802, NM_016621                       |              |
| 1.44E+00 | 5.30E-01  | solute carrier fan | solute carrier fan | NM_182838                                                   | NM_182838    |
| 1.44E+00 | 5.30E-01  | solute carrier fan | solute carrier fan | NM_182838                                                   | NM_182838    |
| 1.44E+00 | 5.30E-01  | solute carrier fan | solute carrier fan | NM_182838                                                   | NM_182838    |
| 2.70E+02 | 8.08E+00  | arginine vasopre   | arginine vasopre   | NM_000707                                                   | NM_000707    |

|          |           |                    |                    |               |                               |
|----------|-----------|--------------------|--------------------|---------------|-------------------------------|
| 3.97E+02 | 8.63E+00  | junctionophilin 3  | junctionophilin 3  | NM_020655     | NM_020655                     |
| 3.90E-03 | -8.00E+00 | dual specificity p | Fc receptor-like t | NM_017823     | NM_017823                     |
| 2.52E+02 | 7.98E+00  | LIM homeobox 2     | NIMA (never in n   | NM_004789     | NM_004789                     |
| 3.40E+02 | 8.41E+00  | fibroblast growth  | ring finger protei | NM_020637     | NM_020637                     |
| 2.62E+02 | 8.03E+00  | copper metaboli    | UDP-GlcNAc:bet:    | NM_152516     | NM_152516                     |
| 2.62E+02 | 8.03E+00  | UDP-GlcNAc:bet:    | UDP-GlcNAc:bet:    | NM_006577     | NM_006577                     |
| 3.07E+02 | 8.26E+00  | cadherin 4, type   | cadherin 4, type   | NM_001794     | NM_001794                     |
| 3.07E+02 | 8.26E+00  | cadherin 4, type   | cadherin 4, type   | NM_001794     | NM_001794                     |
| 3.09E+02 | 8.27E+00  | proline rich 25    | lipase maturatio   | NM_001013638  | NM_001013638                  |
| 3.79E-03 | -8.04E+00 | THUMP domain       | solute carrier fan | NM_025264     | NM_025264                     |
| 2.97E+02 | 8.22E+00  | differentially exp | differentially exp | NM_207514     | NM_207514                     |
| 2.93E+02 | 8.20E+00  | proline/serine-ric | proline/serine-ric | NM_032636,NM  | NM_032636,NM_001032291,NM_    |
| 2.93E+02 | 8.20E+00  | proline/serine-ric | proline/serine-ric | NM_032636,NM  | NM_032636,NM_001032291,NM_    |
| 2.95E+02 | 8.21E+00  | Down syndrome      | potassium inwar    | NR_026840,NR_ | (NR_026840,NR_026839,NR_02684 |
| 4.72E-03 | -7.73E+00 | fragile histidine  | t protein tyrosine | NM_002012     | NM_002012                     |
| 4.72E-03 | -7.73E+00 | fragile histidine  | t protein tyrosine | NM_002012     | NM_002012                     |
| 3.58E+02 | 8.48E+00  | abhydrolase don    | abhydrolase don    | NM_024527     | NM_024527                     |
| 3.41E+02 | 8.41E+00  | nuclear factor I/) | nuclear factor I/) | NM_002501     | NM_002501                     |
| 3.41E+02 | 8.41E+00  | nuclear factor I/) | nuclear factor I/) | NM_002501     | NM_002501                     |
| 2.69E+02 | 8.07E+00  | ADAM metallope     | ADAM metallope     | NM_139055     | NM_139055                     |
| 2.69E+02 | 8.07E+00  | ADAM metallope     | ADAM metallope     | NM_139055     | NM_139055                     |
| 2.45E+02 | 7.94E+00  | tumor necrosis f;  | tumor necrosis f:  | NM_004195,NM  | NM_004195,NM_148901,NM_148    |
| 2.85E+02 | 8.15E+00  | doublesex and m    | SWI/SNF related,   | NM_181872,NM  | NM_181872,NM_006557,NM_001    |
| 2.72E+02 | 8.09E+00  | casein kinase 1, c | casein kinase 1, c | NM_139062,NM  | NM_139062,NM_001893           |
| 2.72E+02 | 8.09E+00  | casein kinase 1, c | casein kinase 1, c | NM_139062,NM  | NM_139062,NM_001893           |
| 3.01E+02 | 8.23E+00  | collagen, type VI, | collagen, type VI, | NM_001849,NM  | NM_001849,NM_058175,NM_058    |
| 3.01E+02 | 8.23E+00  | collagen, type VI, | collagen, type VI, | NM_001849,NM  | NM_001849,NM_058175,NM_058    |
| 3.01E+02 | 8.23E+00  | collagen, type VI, | collagen, type VI, | NM_001849,NM  | NM_001849,NM_058175,NM_058    |
| 3.60E+02 | 8.49E+00  | nuclear factor of  | nuclear factor of  | NM_172387,NM  | NM_172387,NM_172389           |
| 3.84E-03 | -8.03E+00 | cytochrome P45(c   | -src tyrosine kin  | NM_000761     | NM_000761                     |
| 3.84E-03 | -8.03E+00 | cytochrome P45(c   | -src tyrosine kin  | NM_000761     | NM_000761                     |
| 2.83E+02 | 8.14E+00  | galanin-like pept  | galanin-like pept  | NM_033106,NM  | NM_033106,NM_001145546        |
| 3.23E-03 | -8.27E+00 | muscle RAS onco    | extended synapt    | NM_001085049  | NM_001085049                  |
| 2.38E+02 | 7.90E+00  | tripartite motif-c | tripartite motif-c | NM_018207     | NM_018207                     |
| 2.38E+02 | 7.90E+00  | tripartite motif-c | tripartite motif-c | NM_018207     | NM_018207                     |
| 3.29E+02 | 8.36E+00  | coactivator-asso   | coactivator-asso   | NM_199141     | NM_199141                     |
| 2.30E+02 | 7.84E+00  | IQ motif and Sec   | IQ motif and Sec   | NM_014869,NM  | NM_014869,NM_001134382        |
| 2.25E+02 | 7.81E+00  | chromosome 1 o     | chromosome 1 o     | NM_001110533, | NM_001110533,NM_152607        |
| 4.05E-03 | -7.95E+00 | fatty acid desatu  | fatty acid desatu  | NM_013402     | NM_013402                     |
| 4.66E-03 | -7.75E+00 | galactosylcerami   | G protein-couple   | NM_001037525  | NM_001037525                  |
| 2.73E+02 | 8.09E+00  | regulatory associ  | regulatory associ  | NM_020761     | NM_020761                     |
| 2.75E+02 | 8.10E+00  | structural mainte  | structural mainte  | NM_148674     | NM_148674                     |
| 1.58E+00 | 6.63E-01  | ribosomal RNA p    | ribosomal RNA p    | NM_015703     | NM_015703                     |
| 1.58E+00 | 6.63E-01  | ribosomal RNA p    | ribosomal RNA p    | NM_015703     | NM_015703                     |
| 2.67E+02 | 8.06E+00  | regulatory factor  | regulatory factor  | NM_000635,NM  | NM_000635,NM_134433           |
| 2.42E+02 | 7.92E+00  | meteorin, glial c  | meteorin, glial c  | NM_024042     | NM_024042                     |
| 2.66E+02 | 8.05E+00  | G patch domain     | MAGI family mer    | NM_015698     | NM_015698                     |
| 3.41E+02 | 8.41E+00  | plexin A3          | plexin A3          | NM_017514     | NM_017514                     |
| 3.41E+02 | 8.41E+00  | plexin A3          | plexin A3          | NM_017514     | NM_017514                     |
| 3.64E-03 | -8.10E+00 | choroideremia (F   | dachshund homoc    | NM_001145414  | NM_001145414                  |
| 2.09E+02 | 7.70E+00  | zinc finger protei | zinc finger protei | NM_001127464  | NM_001127464                  |
| 2.09E+02 | 7.70E+00  | zinc finger protei | zinc finger protei | NM_001127464  | NM_001127464                  |
| 1.47E+00 | 5.57E-01  | chromosome 7 o     | chromosome 7 o     | NM_001134395, | NM_001134395,NM_001134396,N   |
| 2.65E+02 | 8.05E+00  | collagen, type Xv  | collagen, type Xv  | NM_030582,NM  | NM_030582,NM_130444           |
| 2.43E+02 | 7.92E+00  | chromobox hom      | chromobox hom      | NM_020649     | NM_020649                     |
| 3.80E-03 | -8.04E+00 | disrupted in rena  | hypothetical LOC   | NM_032839     | NM_032839                     |
| 3.80E-03 | -8.04E+00 | disrupted in rena  | hypothetical LOC   | NM_032839     | NM_032839                     |
| 3.33E+02 | 8.38E+00  | dipeptidase 1 (re  | dipeptidase 1 (re  | NM_001128141  | NM_001128141                  |

|          |           |                     |                     |               |                            |
|----------|-----------|---------------------|---------------------|---------------|----------------------------|
| 3.30E+02 | 8.37E+00  | chymotrypsinogε     | chymotrypsinogε     | NM_001025200  | NM_001025200               |
| 3.30E+02 | 8.37E+00  | chymotrypsinogε     | chymotrypsinogε     | NM_001025200  | NM_001025200               |
| 2.90E+02 | 8.18E+00  | peptidoglycan re    | peptidoglycan re    | NM_005091     | NM_005091                  |
| 3.34E-03 | -8.22E+00 | solute carrier fan  | mediator comple     | NM_173851     | NM_173851                  |
| 3.34E-03 | -8.22E+00 | solute carrier fan  | mediator comple     | NM_173851     | NM_173851                  |
| 2.68E+02 | 8.06E+00  | SRY (sex determi    | ATPase, class VI,   | NM_003106     | NM_003106                  |
| 5.18E-03 | -7.59E+00 | chromosome X o      | chromosome X o      | NM_001031705  | NM_001031705               |
| 5.18E-03 | -7.59E+00 | chromosome X o      | chromosome X o      | NM_001031705  | NM_001031705               |
| 2.23E+02 | 7.80E+00  | Fc fragment of Ig   | Fc fragment of Ig   | NM_003890     | NM_003890                  |
| 2.23E+02 | 7.80E+00  | Fc fragment of Ig   | Fc fragment of Ig   | NM_003890     | NM_003890                  |
| 2.17E+02 | 7.76E+00  | coiled-coil doma    | chromosome 2 o      | NM_138770     | NM_138770                  |
| 2.81E+02 | 8.13E+00  | sushi, nidogen ar   | sushi, nidogen ar   | NM_001080437  | NM_001080437               |
| 3.09E+02 | 8.27E+00  | ubiquitin-like mo   | ubiquitin-like mo   | NM_003334     | NM_003334                  |
| 4.81E-03 | -7.70E+00 | adenylate kinase    | ST6 (alpha-N-ace    | NM_000476     | NM_000476                  |
| 3.21E-03 | -8.28E+00 | family with sequi   | family with sequi   | NM_153036     | NM_153036                  |
| 3.21E-03 | -8.28E+00 | family with sequi   | family with sequi   | NM_153036     | NM_153036                  |
| 3.21E+02 | 8.33E+00  | isoprenylcysteinε   | hairy and enhanc    | NM_012405     | NM_012405                  |
| 3.20E+02 | 8.32E+00  | testis-specific tra | RNA binding mot     | NR_001541     | NR_001541                  |
| 2.85E+02 | 8.15E+00  | C1q and tumor n     | C1q and tumor n     | NM_198594,NM  | NM_198594,NM_030968        |
| 2.85E+02 | 8.15E+00  | C1q and tumor n     | C1q and tumor n     | NM_198594,NM  | NM_198594,NM_030968        |
| 3.69E-03 | -8.08E+00 | protocadherin al    | protocadherin al    | NM_018909,NM  | NM_018909,NM_031849,NM_031 |
| 3.69E-03 | -8.08E+00 | protocadherin al    | protocadherin al    | NM_018910,NM  | NM_018910,NM_031852        |
| 3.59E-03 | -8.12E+00 | X (inactive)-speci  | non-protein codi    | NR_001564     | NR_001564                  |
| 3.59E-03 | -8.12E+00 | X (inactive)-speci  | non-protein codi    | NR_001564     | NR_001564                  |
| 2.46E+02 | 7.94E+00  | family with sequi   | family with sequi   | NM_152704,NM  | NM_152704,NM_199138        |
| 2.58E+02 | 8.01E+00  | eukaryotic transl   | pancreatic proge    | NM_001958     | NM_001958                  |
| 2.58E+02 | 8.01E+00  | eukaryotic transl   | pancreatic proge    | NM_001958     | NM_001958                  |
| 2.62E+02 | 8.03E+00  | castor zinc finger  | castor zinc finger  | NM_017766     | NM_017766                  |
| 2.62E+02 | 8.03E+00  | castor zinc finger  | castor zinc finger  | NM_017766     | NM_017766                  |
| 3.78E+02 | 8.56E+00  | ankyrin repeat dε   | ankyrin repeat dε   | NM_013275     | NM_013275                  |
| 3.60E+02 | 8.49E+00  | chromosome X o      | chromosome X o      | NM_001145140, | NM_001145140,NM_001145139  |
| 3.60E+02 | 8.49E+00  | chromosome X o      | chromosome X o      | NM_001145140, | NM_001145140,NM_001145139  |
| 2.80E+02 | 8.13E+00  | mesoderm poste      | mesoderm poste      | NM_001039958  | NM_001039958               |
| 3.05E+02 | 8.25E+00  | zinc finger, SWIM   | zinc finger, SWIM   | NM_023072     | NM_023072                  |
| 3.05E+02 | 8.25E+00  | zinc finger, SWIM   | zinc finger, SWIM   | NM_023072     | NM_023072                  |
| 4.53E-03 | -7.78E+00 | signal transducer   | signal transducer   | NM_003151     | NM_003151                  |
| 3.24E+02 | 8.34E+00  | vav 1 guanine nu    | vav 1 guanine nu    | NM_005428     | NM_005428                  |
| 1.59E+00 | 6.70E-01  | kinesin family mε   | chromosome 14       | NM_015656     | NM_015656                  |
| 1.59E+00 | 6.70E-01  | kinesin family mε   | chromosome 14       | NM_015656     | NM_015656                  |
| 3.22E-03 | -8.28E+00 | small nucleolar R   | cysteinyI-tRNA sγ   | NR_002982     | NR_002982                  |
| 4.09E-03 | -7.93E+00 | chromosome 12       | transient receptc   | NM_032829     | NM_032829                  |
| 2.67E+02 | 8.06E+00  | NCK-associated †    | NCK-associated †    | NM_001037806  | NM_001037806               |
| 2.67E+02 | 8.06E+00  | NCK-associated †    | NCK-associated †    | NM_001037806  | NM_001037806               |
| 3.30E+02 | 8.36E+00  | ATPase, Ca++ tra    | ATPase, Ca++ tra    | NM_001001344, | NM_001001344,NM_021949     |
| 2.85E+02 | 8.15E+00  | zinc activated lig; | zinc activated lig; | NM_180990     | NM_180990                  |
| 2.23E+02 | 7.80E+00  | SH3-binding dorr    | SH3-binding dorr    | NM_030645     | NM_030645                  |
| 2.23E+02 | 7.80E+00  | SH3-binding dorr    | SH3-binding dorr    | NM_030645     | NM_030645                  |
| 2.72E+02 | 8.09E+00  | EGF-like-domain,    | EGF-like-domain,    | NM_016215     | NM_016215                  |
| 2.52E+02 | 7.98E+00  | POU class 2 hom     | death effector dε   | NM_002698     | NM_002698                  |
| 2.52E+02 | 7.98E+00  | POU class 2 hom     | death effector dε   | NM_002698     | NM_002698                  |
| 3.79E-03 | -8.04E+00 | ---                 | surfactant protei   | NM_006926     | NM_006926                  |
| 3.79E-03 | -8.04E+00 | ---                 | surfactant protei   | NM_006926     | NM_006926                  |
| 3.31E+02 | 8.37E+00  | SH3-domain GRB      | SH3-domain GRE      | NM_003025     | NM_003025                  |
| 2.80E+02 | 8.13E+00  | glutamic-pyruvat    | major facilitator   | NM_005309     | NM_005309                  |
| 3.86E-03 | -8.02E+00 | FAT tumor suppr     | FAT tumor suppr     | NM_001447     | NM_001447                  |
| 2.42E+02 | 7.92E+00  | GLI family zinc fir | GLI family zinc fir | NM_000168     | NM_000168                  |
| 4.78E-03 | -7.71E+00 | nuclear receptor    | spermatogenesis     | NM_001145157  | NM_001145157               |
| 4.78E-03 | -7.71E+00 | nuclear receptor    | spermatogenesis     | NM_001145157  | NM_001145157               |

|          |           |                     |                     |                                                                         |                                                                         |
|----------|-----------|---------------------|---------------------|-------------------------------------------------------------------------|-------------------------------------------------------------------------|
| 1.96E+02 | 7.62E+00  | 2,4-dienoyl CoA     | 2,4-dienoyl CoA     | NM_020664                                                               | NM_020664                                                               |
| 1.96E+02 | 7.62E+00  | 2,4-dienoyl CoA     | 2,4-dienoyl CoA     | NM_020664                                                               | NM_020664                                                               |
| 2.24E+02 | 7.81E+00  | hypothetical LOC    | RAB12, member       | NR_024419                                                               | NR_024419                                                               |
| 2.52E+02 | 7.98E+00  | ciliary rootlet coi | ciliary rootlet coi | NR_026752                                                               | NR_026752                                                               |
| 3.21E+02 | 8.33E+00  | REST corepresso     | TNF receptor-ass    | NM_015156                                                               | NM_015156                                                               |
| 3.14E+02 | 8.30E+00  | signal peptide pe   | signal peptide pe   | NM_152988,NM_152988,NM_001077238                                        | NM_152988,NM_152988,NM_001077238                                        |
| 3.14E+02 | 8.30E+00  | signal peptide pe   | signal peptide pe   | NM_152988,NM_152988,NM_001077238                                        | NM_152988,NM_152988,NM_001077238                                        |
| 3.95E-03 | -7.98E+00 | GATA binding pro    | hypothetical pro    | NM_032638,NM_032638,NM_001145661,NM_001145661,NM_001145661,NM_001145661 | NM_032638,NM_032638,NM_001145661,NM_001145661,NM_001145661,NM_001145661 |
| 3.95E-03 | -7.98E+00 | hypothetical pro    | hypothetical pro    | NR_026954                                                               | NR_026954                                                               |
| 2.36E+02 | 7.88E+00  | chromosome 9 o      | chromosome 9 o      | NM_017995,NM_017995,NM_024718                                           | NM_017995,NM_017995,NM_024718                                           |
| 2.36E+02 | 7.88E+00  | chromosome 9 o      | chromosome 9 o      | NM_017995,NM_017995,NM_024718                                           | NM_017995,NM_017995,NM_024718                                           |
| 2.36E+02 | 7.88E+00  | chromosome 9 o      | chromosome 9 o      | NM_001080482                                                            | NM_001080482                                                            |
| 4.98E-03 | -7.65E+00 | protease, serine,   | protease, serine,   | NM_002773                                                               | NM_002773                                                               |
| 4.38E-03 | -7.83E+00 | peptidase D         | carbohydrate (N-    | NM_000285                                                               | NM_000285                                                               |
| 4.38E-03 | -7.83E+00 | peptidase D         | carbohydrate (N-    | NM_000285                                                               | NM_000285                                                               |
| 2.87E+02 | 8.16E+00  | testis-specific tra | testis-specific tra | NR_003593,NR_001540                                                     | NR_003593,NR_001540                                                     |
| 3.25E+02 | 8.34E+00  | tuftelin interacti  | tuftelin interacti  | NM_001008697, NM_001008697,NM_012143                                    | NM_001008697, NM_001008697,NM_012143                                    |
| 3.80E-03 | -8.04E+00 | F-box and leucine   | wingless-type MI    | NM_152441                                                               | NM_152441                                                               |
| 3.27E-03 | -8.26E+00 | calcium channel,    | retinoblastoma t    | NM_006539                                                               | NM_006539                                                               |
| 3.06E+02 | 8.26E+00  | protein phosphat    | glutamic-pyruvat    | NM_032902                                                               | NM_032902                                                               |
| 2.53E+02 | 7.98E+00  | galanin receptor    | sal-like 3 (Droso   | NM_001480                                                               | NM_001480                                                               |
| 2.53E+02 | 7.98E+00  | galanin receptor    | sal-like 3 (Droso   | NM_001480                                                               | NM_001480                                                               |
| 4.01E-03 | -7.96E+00 | chromosome 11       | chromosome 11       | NM_024650                                                               | NM_024650                                                               |
| 2.62E+02 | 8.03E+00  | angiopoietin-like   | UbiA prenyltrans    | NM_021146                                                               | NM_021146                                                               |
| 2.62E+02 | 8.03E+00  | angiopoietin-like   | UbiA prenyltrans    | NM_021146                                                               | NM_021146                                                               |
| 2.65E+02 | 8.05E+00  | glia maturation f   | glia maturation f   | NM_004877                                                               | NM_004877                                                               |
| 2.65E+02 | 8.05E+00  | glia maturation f   | glia maturation f   | NM_004877                                                               | NM_004877                                                               |
| 3.06E+02 | 8.26E+00  | archaelysin famil   | archaelysin famil   | NM_133463                                                               | NM_133463                                                               |
| 1.47E+00 | 5.59E-01  | adhesion regulat    | adhesion regulat    | NM_007002,NM_175573                                                     | NM_007002,NM_175573                                                     |
| 2.43E+02 | 7.92E+00  | mitogen-activate    | mitogen-activate    | NM_002751                                                               | NM_002751                                                               |
| 1.22E+00 | 2.89E-01  | null                | phosphatidylinos    | null                                                                    | null                                                                    |
| 1.22E+00 | 2.89E-01  | null                | phosphatidylinos    | null                                                                    | null                                                                    |
| 2.78E+02 | 8.12E+00  | family with sequi   | proteasome (pro     | NM_032448                                                               | NM_032448                                                               |
| 2.78E+02 | 8.12E+00  | family with sequi   | proteasome (pro     | NM_032448                                                               | NM_032448                                                               |
| 2.11E+00 | 1.08E+00  | collagen, type XV   | collagen, type XV   | NM_030582,NM_130444                                                     | NM_030582,NM_130444                                                     |
| 2.20E+02 | 7.78E+00  | chromosome 9 o      | NOTCH-regulate      | NM_017723                                                               | NM_017723                                                               |
| 4.05E-03 | -7.95E+00 | chromosome X o      | proline syntheta    | NR_003671                                                               | NR_003671                                                               |
| 4.22E-03 | -7.89E+00 | regulator of chro   | Rho guanine nuc     | NM_001136204, NM_001136204,NM_018715                                    | NM_001136204, NM_001136204,NM_018715                                    |
| 4.22E-03 | -7.89E+00 | regulator of chro   | Rho guanine nuc     | NM_001136204, NM_001136204,NM_018715                                    | NM_001136204, NM_001136204,NM_018715                                    |
| 1.16E+00 | 2.19E-01  | growth factor inc   | growth factor inc   | NM_004188,NM_001135031                                                  | NM_004188,NM_001135031                                                  |
| 1.16E+00 | 2.19E-01  | growth factor inc   | growth factor inc   | NM_004188,NM_001135031                                                  | NM_004188,NM_001135031                                                  |
| 3.34E-03 | -8.22E+00 | trafficking protei  | trafficking protei  | NM_001042646                                                            | NM_001042646                                                            |
| 3.34E-03 | -8.22E+00 | trafficking protei  | trafficking protei  | NM_001042646                                                            | NM_001042646                                                            |
| 2.70E+02 | 8.07E+00  | nanos homolog ε     | nanos homolog ε     | NM_001098622                                                            | NM_001098622                                                            |
| 2.30E+02 | 7.85E+00  | wingless-type MI    | wingless-type MI    | NM_030753                                                               | NM_030753                                                               |
| 2.30E+02 | 7.85E+00  | wingless-type MI    | wingless-type MI    | NM_030753                                                               | NM_030753                                                               |
| 2.30E+02 | 7.85E+00  | chromosome 19       | ephrin-A2           | NM_017914                                                               | NM_017914                                                               |
| 4.53E-03 | -7.78E+00 | family with sequi   | coiled-coil doma    | NR_026809                                                               | NR_026809                                                               |
| 2.93E+02 | 8.20E+00  | ADAMTS-like 2       | ADAMTS-like 2       | NM_014694                                                               | NM_014694                                                               |
| 3.54E+02 | 8.47E+00  | MAD1 mitotic ar     | MAD1 mitotic ar     | NM_003550,NM_001013837,NM_001013837,NM_001013837,NM_001013837           | NM_003550,NM_001013837,NM_001013837,NM_001013837,NM_001013837           |
| 3.54E+02 | 8.47E+00  | MAD1 mitotic ar     | MAD1 mitotic ar     | NM_003550,NM_001013837,NM_001013837,NM_001013837,NM_001013837           | NM_003550,NM_001013837,NM_001013837,NM_001013837,NM_001013837           |
| 3.54E+02 | 8.47E+00  | MAD1 mitotic ar     | MAD1 mitotic ar     | NM_003550,NM_001013837,NM_001013837,NM_001013837,NM_001013837           | NM_003550,NM_001013837,NM_001013837,NM_001013837,NM_001013837           |
| 2.28E+02 | 7.83E+00  | pyruvate carboxy    | pyruvate carboxy    | NM_022172,NM_001040716,NM_001040716,NM_001040716,NM_001040716           | NM_022172,NM_001040716,NM_001040716,NM_001040716,NM_001040716           |
| 2.80E+02 | 8.13E+00  | fatty acid syntha   | fatty acid syntha   | NM_004104                                                               | NM_004104                                                               |
| 2.80E+02 | 8.13E+00  | fatty acid syntha   | fatty acid syntha   | NM_004104                                                               | NM_004104                                                               |
| 2.62E+02 | 8.03E+00  | lymphocyte antiε    | chromosome 8 o      | NM_001127213, NM_001127213,NM_002346                                    | NM_001127213, NM_001127213,NM_002346                                    |
| 2.76E+02 | 8.11E+00  | proteasome (pro     | proteasome (pro     | NM_001134340, NM_001134340,NM_032302                                    | NM_001134340, NM_001134340,NM_032302                                    |
| 4.13E-03 | -7.92E+00 | transmembrane       | ArfGAP with FG      | r NM_024795                                                             | NM_024795                                                               |

|          |           |                                                    |                               |                               |
|----------|-----------|----------------------------------------------------|-------------------------------|-------------------------------|
| 3.12E+02 | 8.29E+00  | twinfilin, actin-bi protein phosphatase            | NM_007284                     | NM_007284                     |
| 3.00E+02 | 8.23E+00  | fascin homolog 1                                   | NM_003088                     | NM_003088                     |
| 3.00E+02 | 8.23E+00  | fascin homolog 1                                   | NM_003088                     | NM_003088                     |
| 3.39E+02 | 8.41E+00  | solute carrier fan CCAAT/enhancer                  | NM_019849                     | NM_019849                     |
| 3.39E+02 | 8.41E+00  | solute carrier fan CCAAT/enhancer                  | NM_019849                     | NM_019849                     |
| 3.39E+02 | 8.41E+00  | solute carrier fan CCAAT/enhancer                  | NM_019849                     | NM_019849                     |
| 2.94E+02 | 8.20E+00  | elastase, neutrophilic                             | NM_001972                     | NM_001972                     |
| 3.25E+02 | 8.34E+00  | G protein-coupled                                  | NM_002929                     | NM_002929                     |
| 2.65E+02 | 8.05E+00  | calcium channel, calcium channel, voltage-gated    | NM_021098,NM_001005407        | NM_021098,NM_001005407        |
| 3.26E+02 | 8.35E+00  | matrix metalloproteinase                           | NR_002946                     | NR_002946                     |
| 3.26E+02 | 8.35E+00  | matrix metalloproteinase                           | NR_002946                     | NR_002946                     |
| 4.05E+02 | 8.66E+00  | troponin I type 2 lymphocyte-specific              | NM_001145841                  | NM_001145841                  |
| 2.14E+02 | 7.74E+00  | nucleolar component tubulin, alpha 3d              | NR_002826                     | NR_002826                     |
| 2.14E+02 | 7.74E+00  | nucleolar component tubulin, alpha 3d              | NR_002826                     | NR_002826                     |
| 2.40E+02 | 7.91E+00  | potassium channel                                  | NM_016601                     | NM_016601                     |
| 2.40E+02 | 7.91E+00  | potassium channel                                  | NM_016601                     | NM_016601                     |
| 2.61E-03 | -8.58E+00 | mRNA turnover                                      | NM_016183                     | NM_016183                     |
| 4.04E+02 | 8.66E+00  | tripartite motif-c fumarylacetoacetate             | NM_138800                     | NM_138800                     |
| 3.29E-03 | -8.25E+00 | adenosine A3 receptor RAP1A, member of             | NM_000677                     | NM_000677                     |
| 2.86E+02 | 8.16E+00  | WD repeat domain                                   | NM_024100                     | NM_024100                     |
| 3.42E+02 | 8.42E+00  | shisa homolog 6                                    | NM_207386                     | NM_207386                     |
| 3.42E+02 | 8.42E+00  | shisa homolog 6                                    | NM_207386                     | NM_207386                     |
| 4.74E-03 | -7.72E+00 | chondroitin sulfate outer dense fiber              | NM_001897                     | NM_001897                     |
| 3.37E+02 | 8.40E+00  | protein phosphatase                                | NM_013239,NM_199326           | NM_013239,NM_199326           |
| 3.59E+02 | 8.49E+00  | solute carrier fan                                 | NM_006598                     | NM_006598                     |
| 3.59E+02 | 8.49E+00  | solute carrier fan                                 | NM_001003841                  | NM_001003841                  |
| 2.96E+02 | 8.21E+00  | ubiquitin-conjugase EF-hand calcium-binding domain | NM_003350                     | NM_003350                     |
| 4.35E-03 | -7.84E+00 | cyclin L1 ventricular zone                         | NM_020307                     | NM_020307                     |
| 4.01E-03 | -7.96E+00 | poly(A) polymerase monocytic to macrophage         | NM_020144                     | NM_020144                     |
| 4.40E-03 | -7.83E+00 | egf-like module c                                  | NR_024075                     | NR_024075                     |
| 3.76E-03 | -8.05E+00 | ornithine decarboxylase nucleolar protein          | NM_002539                     | NM_002539                     |
| 3.15E+02 | 8.30E+00  | synaptosomal-associated protease, serine           | NM_053052                     | NM_053052                     |
| 4.64E-03 | -7.75E+00 | capping protein (chromosome 1 ortholog)            | NM_004930                     | NM_004930                     |
| 2.88E+02 | 8.17E+00  | kinase non-catalytic                               | NM_152643                     | NM_152643                     |
| 3.37E+02 | 8.40E+00  | cysteine-rich protein                              | NM_001311                     | NM_001311                     |
| 2.50E+02 | 7.96E+00  | scinderin                                          | NM_001112706                  | NM_001112706                  |
| 2.39E+02 | 7.90E+00  | protease, serine, zymogen granule                  | NM_006799,NM_144956,NM_144956 | NM_006799,NM_144956,NM_144956 |
| 2.39E+02 | 7.90E+00  | zymogen granule                                    | NM_145252                     | NM_145252                     |
| 2.66E+02 | 8.05E+00  | collagen, type VI                                  | NM_001848                     | NM_001848                     |
| 2.66E+02 | 8.05E+00  | collagen, type VI                                  | NM_001848                     | NM_001848                     |
| 3.87E-03 | -8.01E+00 | tetraspanin 11 DEAD/H (Asp-Glu)                    | NM_001080509                  | NM_001080509                  |
| 4.83E-03 | -7.69E+00 | spectrin, beta, non-muscle                         | NM_006946                     | NM_006946                     |
| 2.85E+02 | 8.15E+00  | PR domain containing                               | NM_022115                     | NM_022115                     |
| 3.95E-03 | -7.98E+00 | chromosome 10 SEC23 interacting protein            | NM_024834                     | NM_024834                     |
| 3.95E-03 | -7.98E+00 | chromosome 10 SEC23 interacting protein            | NM_024834                     | NM_024834                     |
| 2.42E+02 | 7.92E+00  | notch 1 EGF-like domain                            | NM_017617                     | NM_017617                     |
| 3.05E+02 | 8.25E+00  | glutamine rich 2                                   | NM_032134                     | NM_032134                     |
| 3.05E+02 | 8.25E+00  | glutamine rich 2                                   | NM_032134                     | NM_032134                     |
| 3.95E+02 | 8.63E+00  | F-box and WD repeat domain                         | NM_018998                     | NM_018998                     |
| 3.43E+02 | 8.42E+00  | solute carrier fan                                 | NM_004174                     | NM_004174                     |
| 3.43E+02 | 8.42E+00  | solute carrier fan                                 | NM_004174                     | NM_004174                     |
| 3.70E+02 | 8.53E+00  | hypothetical LOC H19, imprinted non-coding RNA     | NR_024471                     | NR_024471                     |
| 3.70E+02 | 8.53E+00  | hypothetical LOC H19, imprinted non-coding RNA     | NR_024471                     | NR_024471                     |
| 5.18E-03 | -7.59E+00 | angiopoietin-like GTPase activating protein        | NM_012098                     | NM_012098                     |
| 4.74E-03 | -7.72E+00 | leukocyte immunoglobulin-like receptor             | NM_006669                     | NM_006669                     |
| 2.52E+02 | 7.98E+00  | plexin A1                                          | NM_032242                     | NM_032242                     |
| 2.52E+02 | 7.98E+00  | plexin A1                                          | NM_032242                     | NM_032242                     |
| 2.51E+02 | 7.97E+00  | solute carrier fan                                 | NM_004785,NM_001130012        | NM_004785,NM_001130012        |

|          |           |                                    |                                    |                                      |                             |
|----------|-----------|------------------------------------|------------------------------------|--------------------------------------|-----------------------------|
| 2.96E+02 | 8.21E+00  | early B-cell facto                 | early B-cell facto                 | NM_001005463                         | NM_001005463                |
| 2.53E+02 | 7.98E+00  | anoctamin 9                        | anoctamin 9                        | NM_001012302                         | NM_001012302                |
| 2.53E+02 | 7.98E+00  | anoctamin 9                        | anoctamin 9                        | NM_001012302                         | NM_001012302                |
| 3.54E+02 | 8.47E+00  | mucin 5B, oligom                   | mucin 5B, oligom                   | NM_002458                            | NM_002458                   |
| 3.54E+02 | 8.47E+00  | mucin 5B, oligom                   | mucin 5B, oligom                   | NM_002458                            | NM_002458                   |
| 3.54E+02 | 8.47E+00  | mucin 5B, oligom                   | mucin 5B, oligom                   | NM_002458                            | NM_002458                   |
| 1.83E+00 | 8.68E-01  | ataxin 1                           | ataxin 1                           | NM_001128164,                        | NM_001128164,NM_000332      |
| 4.21E-03 | -7.89E+00 | nuclear factor of CTD (carboxy-ter | nuclear factor of CTD (carboxy-ter | NM_172387,NM_172387,NM_172389        | NM_172387,NM_172389         |
| 4.21E-03 | -7.89E+00 | nuclear factor of CTD (carboxy-ter | nuclear factor of CTD (carboxy-ter | NM_172387,NM_172387,NM_172389        | NM_172387,NM_172389         |
| 2.88E+02 | 8.17E+00  | zinc finger protei                 | zinc finger protei                 | NM_032819                            | NM_032819                   |
| 2.88E+02 | 8.17E+00  | zinc finger protei                 | zinc finger protei                 | NM_032819                            | NM_032819                   |
| 3.13E+02 | 8.29E+00  | KH-type splicing                   | solute carrier fan                 | NM_003685                            | NM_003685                   |
| 3.13E+02 | 8.29E+00  | solute carrier fan                 | solute carrier fan                 | NM_173637                            | NM_173637                   |
| 3.36E+02 | 8.39E+00  | RASD family, mei                   | RASD family, mei                   | NM_014310                            | NM_014310                   |
| 3.36E+02 | 8.39E+00  | RASD family, mei                   | RASD family, mei                   | NM_014310                            | NM_014310                   |
| 3.36E+02 | 8.39E+00  | RASD family, mei                   | RASD family, mei                   | NM_014310                            | NM_014310                   |
| 2.32E+02 | 7.86E+00  | fms-related tyros                  | fms-related tyros                  | NM_002020                            | NM_002020                   |
| 3.57E+02 | 8.48E+00  | non-protein codi                   | phosphofructoki                    | NM_001098830                         | NM_001098830                |
| 3.09E+02 | 8.27E+00  | transferrin recep                  | actin-like 6B                      | NM_003227                            | NM_003227                   |
| 1.46E+00 | 5.44E-01  | FSHD region gen                    | zinc finger protei                 | NM_001124759                         | NM_001124759                |
| 1.46E+00 | 5.44E-01  | FSHD region gen                    | zinc finger protei                 | NM_001124759                         | NM_001124759                |
| 3.11E+02 | 8.28E+00  | HHIP-like 2                        | HHIP-like 2                        | NM_024746                            | NM_024746                   |
| 4.09E-03 | -7.93E+00 | tigger transposat                  | zinc finger protei                 | NM_033208                            | NM_033208                   |
| 2.70E+02 | 8.08E+00  | grainyhead-like 1                  | Kruppel-like fact                  | NM_198182                            | NM_198182                   |
| 1.33E+00 | 4.11E-01  | CTD (carboxy-ter                   | XRCC6 binding pi                   | NM_005730                            | NM_005730                   |
| 1.33E+00 | 4.11E-01  | CTD (carboxy-ter                   | XRCC6 binding pi                   | NM_005730                            | NM_005730                   |
| 2.74E+02 | 8.10E+00  | tumor protein p7                   | tumor protein p7                   | NM_001126240,                        | NM_001126240,NM_001126242,N |
| 1.49E+00 | 5.73E-01  | glycosyltransfera                  | glycosyltransfera                  | NM_024656                            | NM_024656                   |
| 1.49E+00 | 5.73E-01  | glycosyltransfera                  | glycosyltransfera                  | NM_024656                            | NM_024656                   |
| 3.32E+02 | 8.38E+00  | hypothetical LOC                   | CHRNA7 (choline                    | NR_026771                            | NR_026771                   |
| 2.00E+00 | 1.00E+00  | hypothetical LOC                   | hypothetical LOC                   | NR_027081                            | NR_027081                   |
| 4.01E-03 | -7.96E+00 | B9 protein doma                    | B9 protein doma                    | NM_030578                            | NM_030578                   |
| 4.01E-03 | -7.96E+00 | B9 protein doma                    | B9 protein doma                    | NM_030578                            | NM_030578                   |
| 4.01E-03 | -7.96E+00 | B9 protein doma                    | B9 protein doma                    | NM_030578                            | NM_030578                   |
| 4.19E-03 | -7.90E+00 | dickkopf homolo                    | dickkopf homolo                    | NM_014420                            | NM_014420                   |
| 3.03E+02 | 8.24E+00  | nuclear factor of                  | nuclear factor of                  | NM_172390,NM_172390,NM_172388,NM_006 | NM_172390,NM_172388,NM_006  |
| 3.03E+02 | 8.24E+00  | nuclear factor of                  | nuclear factor of                  | NM_172390,NM_172390,NM_172388,NM_006 | NM_172390,NM_172388,NM_006  |
| 2.44E+02 | 7.93E+00  | 5-hydroxytryptar                   | 5-hydroxytryptar                   | NM_000871                            | NM_000871                   |
| 2.85E+02 | 8.15E+00  | similar to cDNA s                  | chromosome 21                      | NM_001013729                         | NM_001013729                |
| 4.04E+02 | 8.66E+00  | GTP binding prot                   | histamine recept                   | NM_015666                            | NM_015666                   |
| 3.64E-03 | -8.10E+00 | potassium voltag                   | WAP four-disulfii                  | NM_172347                            | NM_172347                   |
| 2.04E+02 | 7.67E+00  | DCN1, defective                    | DCN1, defective                    | NM_001014283                         | NM_001014283                |
| 1.77E+00 | 8.20E-01  | zinc finger protei                 | hepatopoietin PC                   | NM_014106                            | NM_014106                   |
| 1.77E+00 | 8.20E-01  | zinc finger protei                 | hepatopoietin PC                   | NM_014106                            | NM_014106                   |
| 3.48E-03 | -8.17E+00 | AF4/FMR2 famil                     | LON peptidase N                    | NM_001025108,                        | NM_001025108,NM_002285      |
| 4.83E-03 | -7.69E+00 | castor zinc finger                 | chromosome 1 o                     | NM_017766                            | NM_017766                   |
| 4.83E-03 | -7.69E+00 | castor zinc finger                 | chromosome 1 o                     | NM_017766                            | NM_017766                   |
| 3.13E+02 | 8.29E+00  | GNAS complex lc                    | GNAS complex lc                    | NM_016592                            | NM_016592                   |
| 4.01E-03 | -7.96E+00 | zinc finger protei                 | histone cluster 1,                 | NM_007149                            | NM_007149                   |
| 4.01E-03 | -7.96E+00 | zinc finger protei                 | histone cluster 1,                 | NM_007149                            | NM_007149                   |
| 3.51E-03 | -8.15E+00 | thrombospondin                     | histamine N-met                    | NM_001080427                         | NM_001080427                |
| 3.51E-03 | -8.15E+00 | thrombospondin                     | histamine N-met                    | NM_001080427                         | NM_001080427                |
| 3.99E-03 | -7.97E+00 | alpha 1,3-galactc                  | polyhomeotic ho                    | NM_001080438                         | NM_001080438                |
| 3.10E+02 | 8.27E+00  | ankyrin repeat d                   | lipase, member I                   | NR_027270                            | NR_027270                   |
| 3.10E+02 | 8.27E+00  | ankyrin repeat d                   | lipase, member I                   | NR_027270                            | NR_027270                   |
| 2.86E+02 | 8.16E+00  | STEAP family me                    | STEAP family me                    | NM_018234,NM_018234,NM_182915,NM_001 | NM_018234,NM_182915,NM_001  |
| 3.50E-03 | -8.16E+00 | programmed cell                    | mitochondrial rit                  | NR_003713                            | NR_003713                   |
| 2.88E+02 | 8.17E+00  | hypothetical pro                   | hypothetical pro                   | NR_002787                            | NR_002787                   |

|          |           |                                                  |                                                |              |
|----------|-----------|--------------------------------------------------|------------------------------------------------|--------------|
| 2.28E+02 | 7.83E+00  | chromosome 1 o chromosome 1 o                    | NM_152610                                      | NM_152610    |
| 2.28E+02 | 7.83E+00  | chromosome 1 o chromosome 1 o                    | NM_152610                                      | NM_152610    |
| 4.43E-03 | -7.82E+00 | chromosome 2 o chromosome 2 o                    | NM_144736,NM_144736,NM_001083946               |              |
| 2.70E+02 | 8.07E+00  | diacylglycerol kir diacylglycerol kir            | NM_003647                                      | NM_003647    |
| 2.67E+02 | 8.06E+00  | plectin plectin                                  | NM_000445,NM_000445,NM_201378,NM_201378        |              |
| 2.67E+02 | 8.06E+00  | plectin plectin                                  | NM_000445,NM_000445,NM_201378,NM_201378        |              |
| 2.67E+02 | 8.06E+00  | plectin plectin                                  | NM_000445,NM_000445,NM_201378,NM_201378        |              |
| 3.37E-03 | -8.21E+00 | neurogenin 1 chemokine (C-X-C motif) superfamily | NM_006161                                      | NM_006161    |
| 3.37E-03 | -8.21E+00 | neurogenin 1 chemokine (C-X-C motif) superfamily | NM_006161                                      | NM_006161    |
| 2.44E+02 | 7.93E+00  | fibronectin leucir fibronectin leucir            | NM_013280                                      | NM_013280    |
| 2.44E+02 | 7.93E+00  | fibronectin leucir fibronectin leucir            | NM_013280                                      | NM_013280    |
| 3.86E+02 | 8.59E+00  | coiled-coil domain ubiquitin specific            | NM_001004306                                   | NM_001004306 |
| 2.22E+02 | 7.79E+00  | paralemmin paralemmin                            | NM_001040134, NM_001040134,NM_002579           |              |
| 2.22E+02 | 7.79E+00  | paralemmin paralemmin                            | NM_001040134, NM_001040134,NM_002579           |              |
| 2.22E+02 | 7.79E+00  | paralemmin paralemmin                            | NM_001040134, NM_001040134,NM_002579           |              |
| 3.68E+02 | 8.52E+00  | Rho GTPase activ Rho GTPase activ                | NM_025251                                      | NM_025251    |
| 3.31E-03 | -8.24E+00 | FYVE, RhoGEF an FYVE, RhoGEF an                  | NM_001083536                                   | NM_001083536 |
| 3.03E+02 | 8.24E+00  | tubulin, alpha 3c tubulin, alpha 3c              | NM_006001                                      | NM_006001    |
| 3.52E-03 | -8.15E+00 | WNT1 inducible : potassium chann                 | NM_003881                                      | NM_003881    |
| 3.16E+02 | 8.30E+00  | small nucleolar R HLA-B associatec               | NR_002971                                      | NR_002971    |
| 3.16E+02 | 8.30E+00  | small nucleolar R HLA-B associatec               | NR_002971                                      | NR_002971    |
| 2.64E+02 | 8.04E+00  | spindle and kinet mitogen-activate               | NM_001039535, NM_001039535,NM_145060           |              |
| 2.64E+02 | 8.04E+00  | mitogen-activate mitogen-activate                | NM_002747                                      | NM_002747    |
| 3.30E-03 | -8.25E+00 | phosphatase and phosphatase and                  | NM_080672                                      | NM_080672    |
| 3.30E-03 | -8.25E+00 | phosphatase and phosphatase and                  | NM_080672                                      | NM_080672    |
| 2.32E+02 | 7.86E+00  | insulin induced g engrailed homeo                | NM_005542,NM_005542,NM_198337,NM_198337        |              |
| 2.32E+02 | 7.86E+00  | insulin induced g engrailed homeo                | NM_005542,NM_005542,NM_198337,NM_198337        |              |
| 2.93E+02 | 8.20E+00  | heparan sulfate ( heparan sulfate (              | NM_001009606                                   | NM_001009606 |
| 3.10E-03 | -8.34E+00 | ethanolamine kir renin                           | NM_018208                                      | NM_018208    |
| 3.10E-03 | -8.34E+00 | ethanolamine kir renin                           | NM_018208                                      | NM_018208    |
| 2.62E+02 | 8.03E+00  | maternally expre maternally expre                | NR_002766                                      | NR_002766    |
| 2.62E+02 | 8.03E+00  | maternally expre maternally expre                | NR_002766                                      | NR_002766    |
| 2.62E+02 | 8.03E+00  | maternally expre maternally expre                | NR_002766                                      | NR_002766    |
| 2.62E+02 | 8.03E+00  | maternally expre maternally expre                | NR_002766                                      | NR_002766    |
| 2.97E+02 | 8.22E+00  | calcium channel, calcium channel,                | NM_021098,NM_021098,NM_001005407               |              |
| 2.97E+02 | 8.22E+00  | calcium channel, calcium channel,                | NM_021098,NM_021098,NM_001005407               |              |
| 3.00E+02 | 8.23E+00  | G protein-couple G protein-couple                | NM_001004106, NM_001004106,NM_002082,NM_002082 |              |
| 3.53E-03 | -8.14E+00 | antisense fragile antisense fragile              | NR_024503, NR_024503, NR_024502, NR_024502     |              |
| 3.53E-03 | -8.14E+00 | antisense fragile antisense fragile              | NR_024503, NR_024503, NR_024502, NR_024502     |              |
| 4.08E-03 | -7.94E+00 | protein tyrosine centromere prot                 | NM_005401                                      | NM_005401    |
| 2.10E+02 | 7.72E+00  | POTE ankyrin doi POTE ankyrin doi                | NM_001005356, NM_001005356,NR_027480           |              |
| 3.63E-03 | -8.10E+00 | olfactomedin 1 KIAA0649                          | NM_006334                                      | NM_006334    |
| 3.37E+02 | 8.40E+00  | G protein-couple zinc finger, AN1-i              | NM_001098201                                   | NM_001098201 |
| 3.37E+02 | 8.40E+00  | crystallin, lambda: crystallin, lambda:          | NM_015974                                      | NM_015974    |
| 3.37E+02 | 8.40E+00  | crystallin, lambda: crystallin, lambda:          | NM_015974                                      | NM_015974    |
| 2.92E+02 | 8.19E+00  | ISL LIM homeobc ISL LIM homeobc                  | NM_145805                                      | NM_145805    |
| 2.92E+02 | 8.19E+00  | ISL LIM homeobc ISL LIM homeobc                  | NM_145805                                      | NM_145805    |
| 5.00E-03 | -7.64E+00 | protease, serine, myosin, light cha              | NM_182702                                      | NM_182702    |
| 4.68E-03 | -7.74E+00 | DENN/MADD doi chromosome 1 o                     | NM_144977                                      | NM_144977    |
| 4.68E-03 | -7.74E+00 | DENN/MADD doi chromosome 1 o                     | NM_144977                                      | NM_144977    |
| 3.51E-03 | -8.15E+00 | chromosome 6 o chromosome 6 o                    | NR_026860                                      | NR_026860    |
| 2.71E+02 | 8.08E+00  | phosphatidylinos phosphatidylinos                | NM_012398                                      | NM_012398    |
| 2.71E+02 | 8.08E+00  | phosphatidylinos phosphatidylinos                | NM_012398                                      | NM_012398    |
| 3.74E-03 | -8.06E+00 | keratin associate keratin associate              | NM_001123387                                   | NM_001123387 |
| 1.17E+00 | 2.30E-01  | signal peptide pe signal peptide pe              | NM_152988,NM_152988,NM_001077238               |              |
| 1.17E+00 | 2.30E-01  | signal peptide pe signal peptide pe              | NM_152988,NM_152988,NM_001077238               |              |
| 2.73E+02 | 8.09E+00  | PR domain conta PR domain conta                  | NM_022115                                      | NM_022115    |
| 3.05E+02 | 8.25E+00  | paraneoplastic ai melanoma antig                 | NM_032882                                      | NM_032882    |



|          |           |                                         |               |                            |
|----------|-----------|-----------------------------------------|---------------|----------------------------|
| 2.50E+02 | 7.96E+00  | methionine sulfo methionine sulfo       | NM_001135671  | NM_001135671               |
| 2.50E+02 | 7.96E+00  | methionine sulfo methionine sulfo       | NM_001135671  | NM_001135671               |
| 3.49E+02 | 8.45E+00  | NLR family, pyrin zinc finger protei    | NM_153447     | NM_153447                  |
| 2.47E+02 | 7.95E+00  | docking protein 3 docking protein 3     | NM_024872     | NM_024872                  |
| 4.88E-03 | -7.68E+00 | FYVE and coiled- FYVE and coiled-       | NM_024513     | NM_024513                  |
| 2.38E+02 | 7.90E+00  | calcium homeost calcium homeost         | NM_001001412  | NM_001001412               |
| 2.38E+02 | 7.90E+00  | calcium homeost calcium homeost         | NM_001001412  | NM_001001412               |
| 3.34E+02 | 8.38E+00  | obscurin-like 1 obscurin-like 1         | NM_015311     | NM_015311                  |
| 2.34E+02 | 7.87E+00  | ATPase, Ca++ tra zinc finger, ZZ-tyl    | NM_174953,NM  | NM_174953,NM_174957,NM_174 |
| 2.43E+02 | 7.92E+00  | kelch-like 26 (Drc kelch-like 26 (Drc   | NM_018316     | NM_018316                  |
| 2.43E+02 | 7.92E+00  | kelch-like 26 (Drc kelch-like 26 (Drc   | NM_018316     | NM_018316                  |
| 3.08E+02 | 8.27E+00  | transcription fact extracellular leuc   | NR_001288     | NR_001288                  |
| 3.08E+02 | 8.27E+00  | transcription fact extracellular leuc   | NR_001288     | NR_001288                  |
| 2.75E+02 | 8.10E+00  | G protein-couple G protein-couple       | NM_001145774  | NM_001145774               |
| 3.17E-03 | -8.30E+00 | C2 calcium-depe hypothetical pro        | NM_001007595  | NM_001007595               |
| 3.38E+02 | 8.40E+00  | protein tyrosine protein tyrosine       | NM_130842,NM  | NM_130842,NM_130843,NM_002 |
| 3.38E+02 | 8.40E+00  | protein tyrosine protein tyrosine       | NM_130842,NM  | NM_130842,NM_130843,NM_002 |
| 3.69E-03 | -8.08E+00 | small nucleolar R small nucleolar R     | NR_000005     | NR_000005                  |
| 2.55E+02 | 8.00E+00  | RAB35, member RAB35, member             | NM_006861     | NM_006861                  |
| 1.49E+00 | 5.79E-01  | kelch-like 17 (Drc kelch-like 17 (Drc   | NM_198317     | NM_198317                  |
| 1.49E+00 | 5.79E-01  | kelch-like 17 (Drc kelch-like 17 (Drc   | NM_198317     | NM_198317                  |
| 1.49E+00 | 5.79E-01  | kelch-like 17 (Drc kelch-like 17 (Drc   | NM_198317     | NM_198317                  |
| 3.01E+02 | 8.23E+00  | TNF receptor-ass complement con         | NM_005658     | NM_005658                  |
| 4.02E-03 | -7.96E+00 | troponin T type 2 ladinin 1             | NM_000364,NM  | NM_000364,NM_001001432,NM_ |
| 3.25E+02 | 8.34E+00  | epsin 1 NLR family, pyrin               | NM_001130071  | NM_001130071               |
| 3.15E-03 | -8.31E+00 | acyl-CoA thioeste spermidine/speri      | NM_001037171, | NM_001037171,NM_001033583  |
| 3.15E-03 | -8.31E+00 | acyl-CoA thioeste spermidine/speri      | NM_001037171, | NM_001037171,NM_001033583  |
| 1.50E+00 | 5.85E-01  | ATPase, class II, t ATPase, class II, t | NM_198531     | NM_198531                  |
| 1.50E+00 | 5.85E-01  | ATPase, class II, t ATPase, class II, t | NM_198531     | NM_198531                  |
| 1.50E+00 | 5.85E-01  | ATPase, class II, t ATPase, class II, t | NM_198531     | NM_198531                  |
| 2.56E+02 | 8.00E+00  | core-binding fact core-binding fact     | NM_175931,NM  | NM_175931,NM_005187        |
| 3.76E-03 | -8.05E+00 | WD repeat doma stimulated by ret        | NM_014149     | NM_014149                  |
| 3.62E+02 | 8.50E+00  | nuclear receptor nuclear receptor       | NM_006312,NM  | NM_006312,NM_001077261     |
| 2.60E+02 | 8.02E+00  | paraoxonase 3 paraoxonase 3             | NM_000940     | NM_000940                  |
| 3.23E+02 | 8.33E+00  | chromosome 2 o ankyrin repeat di        | NM_214461     | NM_214461                  |
| 2.14E+02 | 7.74E+00  | claudin 9 claudin 9                     | NM_020982     | NM_020982                  |
| 2.54E+02 | 7.99E+00  | major facilitator major facilitator     | NM_032219     | NM_032219                  |
| 2.54E+02 | 7.99E+00  | major facilitator major facilitator     | NM_032219     | NM_032219                  |
| 2.71E+02 | 8.08E+00  | chromosome 8 o nicotinate phosp         | NM_001100878  | NM_001100878               |
| 2.71E+02 | 8.08E+00  | nicotinate phosp nicotinate phosp       | NM_145201     | NM_145201                  |
| 4.01E-03 | -7.96E+00 | arginine vasopre: MARVEL domain         | NM_021732     | NM_021732                  |
| 4.01E-03 | -7.96E+00 | arginine vasopre: MARVEL domain         | NM_021732     | NM_021732                  |
| 3.85E-03 | -8.02E+00 | WD repeat and S V-set and immur         | NM_018639     | NM_018639                  |
| 2.90E+02 | 8.18E+00  | heparan sulfate 6 placenta-specific     | NM_004807     | NM_004807                  |
| 3.91E-03 | -8.00E+00 | dysbindin (dysrc growth arrest-sp       | NM_024043,NM  | NM_024043,NM_001042610     |
| 3.91E-03 | -8.00E+00 | dysbindin (dysrc growth arrest-sp       | NM_024043,NM  | NM_024043,NM_001042610     |
| 3.69E-03 | -8.08E+00 | protocadherin b6 protocadherin b6       | NM_018930     | NM_018930                  |
| 3.62E+02 | 8.50E+00  | transcription elo4 ArfGAP with SH3      | NM_003196     | NM_003196                  |
| 4.98E-03 | -7.65E+00 | chromosome 14 chromosome 14             | NR_027004     | NR_027004                  |
| 3.00E+02 | 8.23E+00  | mesoderm specil mesoderm specil         | NM_177524     | NM_177524                  |
| 2.48E+02 | 7.95E+00  | zinc finger, FYVE zinc finger, FYVE     | NM_024071     | NM_024071                  |
| 2.73E+02 | 8.09E+00  | MOB1, Mps One MOB1, Mps One             | NM_130807     | NM_130807                  |
| 2.90E+02 | 8.18E+00  | splicing factor 3b splicing factor 3b   | NM_012426     | NM_012426                  |
| 4.29E-03 | -7.87E+00 | zinc finger protei zinc finger protei   | NM_152909     | NM_152909                  |
| 4.22E-03 | -7.89E+00 | protein kinase, A UDP-N-acetyl-alç      | NM_016203,NM  | NM_016203,NM_001040633,NM_ |
| 4.81E-03 | -7.70E+00 | serpin peptidase ring finger and C1     | NM_000488     | NM_000488                  |
| 5.11E-03 | -7.61E+00 | KIAA0100 stromal cell-deri              | NM_014680     | NM_014680                  |
| 2.64E+02 | 8.04E+00  | GRB2-associated GRB2-associated         | NM_001037814  | NM_001037814               |

|          |           |                    |                    |               |                             |
|----------|-----------|--------------------|--------------------|---------------|-----------------------------|
| 2.64E+02 | 8.04E+00  | GRB2-associated    | GRB2-associated    | NM_001037814  | NM_001037814                |
| 3.98E-03 | -7.97E+00 | family with sequi  | zinc finger protei | NM_145111     | NM_145111                   |
| 3.98E-03 | -7.97E+00 | family with sequi  | zinc finger protei | NM_145111     | NM_145111                   |
| 3.25E+02 | 8.34E+00  | oxidative stress i | oxidative stress i | NM_013370,NM  | NM_013370,NM_182980         |
| 3.30E+02 | 8.36E+00  | G protein-couple   | G protein-couple   | NM_178471     | NM_178471                   |
| 2.91E+02 | 8.19E+00  | DEAD (Asp-Glu-A    | homer homolog      | NM_019070     | NM_019070                   |
| 1.43E+00 | 5.19E-01  | ---                | ---                | NR_002820     | NR_002820                   |
| 2.43E+02 | 7.92E+00  | apoptosis-associ   | apoptosis-associ   | NM_001080395  | NM_001080395                |
| 3.80E-03 | -8.04E+00 | chromosome 16      | chromosome 16      | NM_153025     | NM_153025                   |
| 3.80E-03 | -8.04E+00 | jumping transloc   | RAB13, member      | NM_006694     | NM_006694                   |
| 3.80E-03 | -8.04E+00 | jumping transloc   | RAB13, member      | NM_006694     | NM_006694                   |
| 4.63E+02 | 8.85E+00  | polycystic kidney  | polycystic kidney  | NM_000296,NM  | NM_000296,NM_001009944      |
| 2.88E+02 | 8.17E+00  | adrenergic, beta,  | adrenergic, beta,  | NM_001619     | NM_001619                   |
| 4.33E-03 | -7.85E+00 | hypothetical LOC   | phospholipase C,   | NR_002764     | NR_002764                   |
| 4.33E-03 | -7.85E+00 | hypothetical LOC   | phospholipase C,   | NR_002764     | NR_002764                   |
| 2.68E+02 | 8.06E+00  | CREB regulated t   | CREB regulated t   | NM_001098482, | NM_001098482,NM_015321      |
| 2.68E+02 | 8.06E+00  | CREB regulated t   | CREB regulated t   | NM_001098482, | NM_001098482,NM_015321      |
| 2.78E+02 | 8.12E+00  | melanoma antigen   | CSAG family, me    | NM_153488     | NM_153488                   |
| 2.99E+02 | 8.22E+00  | chromosome 17      | chromosome 17      | NM_001109760, | NM_001109760,NM_025161      |
| 3.17E+02 | 8.31E+00  | chromosome 21      | chromosome 21      | NM_004928     | NM_004928                   |
| 3.17E+02 | 8.31E+00  | chromosome 21      | chromosome 21      | NM_004928     | NM_004928                   |
| 3.01E+02 | 8.23E+00  | IQ motif and Sec   | nucleoporin 210    | NM_014869,NM  | NM_014869,NM_001134382      |
| 1.36E+00 | 4.46E-01  | chromosome 10      | chromosome 10      | NM_017609     | NM_017609                   |
| 4.38E-03 | -7.83E+00 | hyaluronan and     | EGF-like repeats   | NM_001884     | NM_001884                   |
| 4.03E-03 | -7.95E+00 | guanine nucleoti   | lysosomal traffi   | NM_001098722, | NM_001098722,NM_001098721,N |
| 4.03E-03 | -7.95E+00 | guanine nucleoti   | lysosomal traffi   | NM_001098722, | NM_001098722,NM_001098721,N |
| 4.03E-03 | -7.95E+00 | guanine nucleoti   | lysosomal traffi   | NM_001098722, | NM_001098722,NM_001098721,N |
| 1.32E+00 | 4.04E-01  | cytokine recepto   | colony stimulatir  | NM_022148     | NM_022148                   |
| 1.32E+00 | 4.04E-01  | colony stimulatir  | colony stimulatir  | NM_172249,NM  | NM_172249,NM_172245,NM_006  |
| 4.66E-03 | -7.75E+00 | glutathione S-tra  | similar to D-dop   | NR_003081     | NR_003081                   |
| 2.99E+02 | 8.22E+00  | solute carrier fan | solute carrier fan | NM_152346     | NM_152346                   |
| 2.99E+02 | 8.22E+00  | solute carrier fan | solute carrier fan | NM_152346     | NM_152346                   |
| 3.41E-03 | -8.20E+00 | strawberry notc    | serine/threonine   | NM_001100122, | NM_001100122,NM_014963      |
| 3.79E-03 | -8.04E+00 | maternally expre   | maternally expre   | NR_024149     | NR_024149                   |
| 3.79E-03 | -8.04E+00 | maternally expre   | maternally expre   | NR_024149     | NR_024149                   |
| 2.98E+02 | 8.22E+00  | SRY (sex determi   | hypothetical LOC   | NM_014587     | NM_014587                   |
| 3.95E-03 | -7.98E+00 | CDC42 effector p   | leukocyte-associ   | NM_145057     | NM_145057                   |
| 2.99E+02 | 8.22E+00  | ephrin-B1          | ephrin-B1          | NM_004429     | NM_004429                   |
| 1.35E+00 | 4.31E-01  | transketolase-lik  | transketolase-lik  | NM_032136     | NM_032136                   |
| 1.35E+00 | 4.31E-01  | transketolase-lik  | transketolase-lik  | NM_032136     | NM_032136                   |
| 1.35E+00 | 4.31E-01  | transketolase-lik  | chromosome 4 o     | NM_032136     | NM_032136                   |
| 2.94E+02 | 8.20E+00  | solute carrier fan | solute carrier fan | NM_207420     | NM_207420                   |
| 3.71E-03 | -8.07E+00 | family with sequi  | family with sequi  | NM_019054     | NM_019054                   |
| 3.71E-03 | -8.07E+00 | family with sequi  | family with sequi  | NM_019054     | NM_019054                   |
| 3.71E-03 | -8.07E+00 | family with sequi  | family with sequi  | NM_019054     | NM_019054                   |
| 4.02E+02 | 8.65E+00  | Dnaj (Hsp40) hor   | protein tyrosine   | NM_058246     | NM_058246                   |
| 4.02E+02 | 8.65E+00  | Dnaj (Hsp40) hor   | protein tyrosine   | NM_058246     | NM_058246                   |
| 4.02E+02 | 8.65E+00  | Dnaj (Hsp40) hor   | protein tyrosine   | NM_058246     | NM_058246                   |
| 2.28E+02 | 7.83E+00  | killer cell immuni | killer cell immuni | NM_014511,NM  | NM_014511,NM_015868         |
| 3.57E+02 | 8.48E+00  | phosphofructoki    | phosphofructoki    | NM_002626     | NM_002626                   |
| 1.74E+00 | 8.02E-01  | troponin T type    | troponin T type    | NM_001042781, | NM_001042781,NM_001042782,N |
| 2.62E+02 | 8.03E+00  | vasoactive intest  | vasoactive intest  | NM_003382     | NM_003382                   |
| 2.62E+02 | 8.03E+00  | vasoactive intest  | vasoactive intest  | NM_003382     | NM_003382                   |
| 1.59E+00 | 6.73E-01  | zinc finger protei | zinc finger protei | NM_133444     | NM_133444                   |
| 2.28E+02 | 7.83E+00  | active BCR-relate  | active BCR-relate  | NM_001159746  | NM_001159746                |
| 2.28E+02 | 7.83E+00  | active BCR-relate  | active BCR-relate  | NM_001159746  | NM_001159746                |
| 3.60E+02 | 8.49E+00  | COX19 cytochr      | cytochrome P45     | NM_001031617  | NM_001031617                |
| 4.35E-03 | -7.84E+00 | chromosome 17      | ArfGAP with dua    | NM_024683     | NM_024683                   |

|          |           |                                       |                                                        |              |
|----------|-----------|---------------------------------------|--------------------------------------------------------|--------------|
| 3.77E-03 | -8.05E+00 | BEN domain con: PRP18 pre-mRN/        | NM_001100912                                           | NM_001100912 |
| 3.77E-03 | -8.05E+00 | BEN domain con: PRP18 pre-mRN/        | NM_001100912                                           | NM_001100912 |
| 3.55E+02 | 8.47E+00  | low density lipop low density lipop   | NM_002337                                              | NM_002337    |
| 1.60E+00 | 6.74E-01  | tet oncogene fan bola homolog 3       | NM_144993                                              | NM_144993    |
| 4.13E+02 | 8.69E+00  | dimethylarginine dimethylarginine     | NM_013974                                              | NM_013974    |
| 3.84E-03 | -8.03E+00 | potassium voltag nitric oxide synt    | NM_172056                                              | NM_172056    |
| 4.16E+02 | 8.70E+00  | pregnancy up-reę solute carrier fan   | NM_001039582, NM_001039582, NM_001135740               |              |
| 2.27E+02 | 7.82E+00  | Rho GTPase activ Rho GTPase activ     | NM_001025598, NM_001025598, NM_181720                  |              |
| 2.73E+02 | 8.09E+00  | LAG1 homolog, c lines homolog 1       | NM_178842                                              | NM_178842    |
| 3.02E+02 | 8.24E+00  | EPS8-like 2 EPS8-like 2               | NM_022772                                              | NM_022772    |
| 3.02E+02 | 8.24E+00  | EPS8-like 2 EPS8-like 2               | NM_022772                                              | NM_022772    |
| 2.56E+02 | 8.00E+00  | chromosome 6 o hypothetical pro:      | NR_026780                                              | NR_026780    |
| 2.91E+02 | 8.19E+00  | ras responsive el ras responsive el   | NM_001003698, NM_001003698, NM_001003699               |              |
| 2.45E+02 | 7.94E+00  | retinitis pigmenti retinitis pigmenti | NM_178857                                              | NM_178857    |
| 2.36E+02 | 7.88E+00  | sclerostin domaii ankyrin repeat a    | NM_015464                                              | NM_015464    |
| 2.36E+02 | 7.88E+00  | sclerostin domaii ankyrin repeat a    | NM_015464                                              | NM_015464    |
| 4.50E-03 | -7.80E+00 | fatty acid bindingę chaperonin cont:  | NR_002935                                              | NR_002935    |
| 3.50E+02 | 8.45E+00  | G protein-couple G protein-couple     | NM_016235                                              | NM_016235    |
| 3.36E-03 | -8.22E+00 | endothelin recep POU class 4 hom      | NM_003991, NM_003991, NM_001122659, NM_001122659       |              |
| 3.33E+02 | 8.38E+00  | pitrilysin metallo Kruppel-like fact  | NM_014889                                              | NM_014889    |
| 3.97E+02 | 8.63E+00  | PQ loop repeat c heat shock facto     | NM_001146343, NM_001146343, NM_001146345, NM_001146345 |              |
| 3.79E-03 | -8.04E+00 | craniofacial deve transmembrane       | NM_006324                                              | NM_006324    |
| 4.52E-03 | -7.79E+00 | mannosidase, be v-src sarcoma (St     | NM_022077, NM_022077, NM_001003897                     |              |
| 2.52E+02 | 7.98E+00  | SET domain cont SET domain cont       | NM_015048                                              | NM_015048    |
| 2.52E+02 | 7.98E+00  | SET domain cont SET domain cont       | NM_015048                                              | NM_015048    |
| 4.18E-03 | -7.90E+00 | chromosome 12 chromosome 12           | NM_001135864                                           | NM_001135864 |
| 3.01E+02 | 8.23E+00  | mucin 5AC, oligo mucin 5AC, oligo     | NM_017511                                              | NM_017511    |
| 3.60E+02 | 8.49E+00  | chromosome 16 chromosome 16           | NR_024347                                              | NR_024347    |
| 3.28E+02 | 8.36E+00  | calcium binding ħ calcium binding ħ   | NM_145200                                              | NM_145200    |
| 4.09E-03 | -7.93E+00 | N-acetylglucosan hydroxysteroid (:    | NM_000263                                              | NM_000263    |
| 4.09E-03 | -7.93E+00 | N-acetylglucosan hydroxysteroid (:    | NM_000263                                              | NM_000263    |
| 4.90E-03 | -7.67E+00 | calmodulin regul UBA domain con       | NM_015447                                              | NM_015447    |
| 3.19E+02 | 8.32E+00  | laminin, alpha 5 laminin, alpha 5     | NM_005560                                              | NM_005560    |
| 3.19E+02 | 8.32E+00  | laminin, alpha 5 laminin, alpha 5     | NM_005560                                              | NM_005560    |
| 2.48E+02 | 7.95E+00  | CTD (carboxy-ter CTD (carboxy-ter     | NM_048368, NM_048368, NM_004715                        |              |
| 2.48E+02 | 7.95E+00  | CTD (carboxy-ter CTD (carboxy-ter     | NM_048368, NM_048368, NM_004715                        |              |
| 2.34E+02 | 7.87E+00  | chromosome 1 o chromosome 1 o         | NM_024676                                              | NM_024676    |
| 2.34E+02 | 7.87E+00  | chromosome 1 o chromosome 1 o         | NM_024676                                              | NM_024676    |
| 2.34E+02 | 7.87E+00  | family with sequi family with sequi   | NM_018166                                              | NM_018166    |
| 3.25E+02 | 8.34E+00  | chromosome 1 o chromosome 1 o         | NM_001114748                                           | NM_001114748 |
| 3.25E+02 | 8.34E+00  | chromosome 1 o SSU72 RNA polyr        | NM_001114748                                           | NM_001114748 |
| 2.84E+02 | 8.15E+00  | notch 1 notch 1                       | NM_017617                                              | NM_017617    |
| 2.84E+02 | 8.15E+00  | notch 1 notch 1                       | NM_017617                                              | NM_017617    |
| 3.76E-03 | -8.05E+00 | myotubularin rel zinc finger RNA b    | NM_001040446                                           | NM_001040446 |
| 3.76E-03 | -8.05E+00 | myotubularin rel zinc finger RNA b    | NM_001040446                                           | NM_001040446 |
| 3.13E+02 | 8.29E+00  | solute carrier fan solute carrier fan | NM_003052                                              | NM_003052    |
| 2.83E+02 | 8.14E+00  | paired box 8 paired box 8             | NM_013952, NM_013952, NM_013953, NM_013953             |              |
| 3.45E+02 | 8.43E+00  | family with sequi family with sequi   | NM_182614                                              | NM_182614    |
| 2.14E+02 | 7.74E+00  | sterile alpha mot sterile alpha mot   | NM_152486                                              | NM_152486    |
| 2.14E+02 | 7.74E+00  | sterile alpha mot sterile alpha mot   | NM_152486                                              | NM_152486    |
| 3.58E-03 | -8.13E+00 | olfactory receptc olfactory receptc   | NM_001004195                                           | NM_001004195 |
| 4.85E-03 | -7.69E+00 | family with sequi fumarylacetoace     | NM_016490                                              | NM_016490    |
| 2.66E+02 | 8.05E+00  | troponin T type ħ troponin T type ħ   | NM_001042781, NM_001042781, NM_001042782, NM_001042782 |              |
| 1.83E+00 | 8.68E-01  | ataxin 1 ataxin 1                     | NM_001128164, NM_001128164, NM_000332                  |              |
| 3.01E+02 | 8.23E+00  | potassium chann mitogen-activate      | NM_005714, NM_005714, NM_033347, NM_033347             |              |
| 3.01E+02 | 8.23E+00  | mitogen-activate mitogen-activate     | NM_002419                                              | NM_002419    |
| 2.95E+02 | 8.21E+00  | proline-rich tranę proline-rich tranę | NM_145239                                              | NM_145239    |
| 2.95E+02 | 8.21E+00  | proline-rich tranę proline-rich tranę | NM_145239                                              | NM_145239    |

|          |           |                    |                    |               |                             |
|----------|-----------|--------------------|--------------------|---------------|-----------------------------|
| 3.06E+02 | 8.26E+00  | proprotein conv    | proprotein conv    | NM_138322     | NM_138322                   |
| 2.01E+02 | 7.65E+00  | TBC1 domain fan    | Meis homeobox      | NM_178571     | NM_178571                   |
| 2.80E+02 | 8.13E+00  | tumor necrosis f   | tumor necrosis f   | NM_001039664  | NM_001039664                |
| 2.80E+02 | 8.13E+00  | tumor necrosis f   | tumor necrosis f   | NM_001039664  | NM_001039664                |
| 2.47E+02 | 7.95E+00  | small nuclear rib  | RER1 retention ir  | NR_024489     | NR_024489                   |
| 3.54E+02 | 8.47E+00  | solute carrier fan | solute carrier fan | NM_145282     | NM_145282                   |
| 2.87E-03 | -8.45E+00 | solute carrier fan | protein phosphat   | NM_001135153  | NM_001135153                |
| 2.43E+02 | 7.92E+00  | chromosome 2 o     | sushi, nidogen ar  | NM_024861,NM  | NM_024861,NM_001085437      |
| 2.43E+02 | 7.92E+00  | chromosome 2 o     | sushi, nidogen ar  | NM_024861,NM  | NM_024861,NM_001085437      |
| 2.70E+02 | 8.07E+00  | chromosome 19      | ephrin-A2          | NM_017914     | NM_017914                   |
| 2.30E+02 | 7.84E+00  | cholinergic recep  | ADAM metallope     | NM_000750     | NM_000750                   |
| 2.30E+02 | 7.84E+00  | cholinergic recep  | ADAM metallope     | NM_000750     | NM_000750                   |
| 4.64E-03 | -7.75E+00 | potassium voltag   | potassium voltag   | NM_003471     | NM_003471                   |
| 4.64E-03 | -7.75E+00 | potassium voltag   | potassium voltag   | NM_003471     | NM_003471                   |
| 3.82E-03 | -8.03E+00 | growth regulatio   | growth regulatio   | NM_148903     | NM_148903                   |
| 4.66E-03 | -7.75E+00 | NLR family, pyrin  | NLR family, pyrin  | NM_001079821, | NM_001079821,NM_001127461   |
| 3.62E-03 | -8.11E+00 | TAF12 RNA polyr    | RNA, U11 small r   | NM_005644,NM  | NM_005644,NM_001135218      |
| 3.28E-03 | -8.25E+00 | Bcl2 modifying f   | budding uninhibi   | NM_001003943, | NM_001003943,NM_001003942,N |
| 4.38E-03 | -7.83E+00 | potassium chann    | spermatogenesis    | NM_138318,NM  | NM_138318,NM_138317,NM_021  |
| 2.63E+02 | 8.04E+00  | aspartate dehydr   | leucine rich repe  | NM_001024656, | NM_001024656,NM_001114598   |
| 2.63E+02 | 8.04E+00  | leucine rich repe  | leucine rich repe  | NM_001080457  | NM_001080457                |
| 3.27E+02 | 8.35E+00  | diacylglycerol lip | diacylglycerol lip | NM_006133     | NM_006133                   |
| 3.27E+02 | 8.35E+00  | diacylglycerol lip | diacylglycerol lip | NM_006133     | NM_006133                   |
| 4.57E-03 | -7.77E+00 | fermitin family    | rr bone morphoger  | NM_017671     | NM_017671                   |
| 3.50E-03 | -8.16E+00 | zinc finger protei | NLR family, pyrin  | NM_032752     | NM_032752                   |
| 4.94E-03 | -7.66E+00 | chromosome 14      | acyl-CoA thioeste  | NM_024644     | NM_024644                   |
| 3.83E+02 | 8.58E+00  | G-protein signalii | G-protein signalii | NM_001145638, | NM_001145638,NM_015597      |
| 3.83E+02 | 8.58E+00  | G-protein signalii | G-protein signalii | NM_001145638, | NM_001145638,NM_015597      |
| 3.67E+02 | 8.52E+00  | transcriptional r  | transcriptional r  | NM_033502     | NM_033502                   |
| 3.06E+02 | 8.26E+00  | dystrophia myoti   | dystrophia myoti   | NM_004409,NM  | NM_004409,NM_001081562,NM_  |
| 1.48E+00 | 5.62E-01  | non-protein codi   | phosphofructoki    | NM_001098830  | NM_001098830                |
| 1.48E+00 | 5.62E-01  | non-protein codi   | phosphofructoki    | NM_001098830  | NM_001098830                |
| 3.71E+02 | 8.54E+00  | actin-like 8       | actin-like 8       | NM_030812     | NM_030812                   |
| 3.71E+02 | 8.54E+00  | actin-like 8       | actin-like 8       | NM_030812     | NM_030812                   |
| 3.71E+02 | 8.54E+00  | actin-like 8       | actin-like 8       | NM_030812     | NM_030812                   |
| 3.52E-03 | -8.15E+00 | tripartite motif-c | tripartite motif-c | NM_001105522  | NM_001105522                |
| 2.69E+02 | 8.07E+00  | carbohydrate (N-   | carbohydrate (N-   | NM_021615     | NM_021615                   |
| 2.69E+02 | 8.07E+00  | carbohydrate (N-   | carbohydrate (N-   | NM_021615     | NM_021615                   |
| 5.11E-03 | -7.61E+00 | cut-like homeob    | cut-like homeob    | NM_015267     | NM_015267                   |
| 2.76E+02 | 8.11E+00  | apolipoprotein B   | ATPase family, A   | NM_000384     | NM_000384                   |
| 2.08E+02 | 7.70E+00  | cathepsin Z        | cathepsin Z        | NM_001336     | NM_001336                   |
| 1.25E+00 | 3.23E-01  | serine incorporat  | serine incorporat  | NM_001033517  | NM_001033517                |
| 1.25E+00 | 3.23E-01  | serine incorporat  | serine incorporat  | NM_001033517  | NM_001033517                |
| 3.30E+02 | 8.37E+00  | TBC1 domain fan    | TBC1 domain fan    | NM_020705     | NM_020705                   |
| 2.12E+02 | 7.73E+00  | lipase maturatio   | lipase maturatio   | NM_022773     | NM_022773                   |
| 2.12E+02 | 7.73E+00  | lipase maturatio   | lipase maturatio   | NM_022773     | NM_022773                   |
| 4.38E-03 | -7.83E+00 | bleomycin hydro    | transmembrane      | NM_000386     | NM_000386                   |
| 2.22E+02 | 7.79E+00  | zinc finger protei | zinc finger protei | NM_133374     | NM_133374                   |
| 2.22E+02 | 7.79E+00  | zinc finger protei | zinc finger protei | NM_133374     | NM_133374                   |
| 2.22E+02 | 7.79E+00  | Rho GDP dissoci    | Rho GDP dissoci    | NM_004309     | NM_004309                   |
| 3.59E-03 | -8.12E+00 | hypothetical LOC   | hypothetical LOC   | NR_015419     | NR_015419                   |
| 4.72E-03 | -7.73E+00 | sema domain, in    | hepatocyte grow    | NM_006379     | NM_006379                   |
| 4.88E+02 | 8.93E+00  | NK6 homeobox 2     | chromosome 10      | NM_177400     | NM_177400                   |
| 3.87E-03 | -8.01E+00 | zinc finger protei | histone cluster 1, | NM_007149     | NM_007149                   |
| 2.77E+02 | 8.11E+00  | tyrosine kinase, r | tyrosine kinase, r | NM_005781,NM  | NM_005781,NM_001010938      |
| 3.76E+02 | 8.56E+00  | ankyrin repeat d   | ankyrin repeat d   | NM_013275     | NM_013275                   |
| 3.76E+02 | 8.56E+00  | ankyrin repeat d   | ankyrin repeat d   | NM_013275     | NM_013275                   |
| 3.76E+02 | 8.56E+00  | ankyrin repeat d   | ankyrin repeat d   | NM_013275     | NM_013275                   |

|          |           |                     |                       |                                           |
|----------|-----------|---------------------|-----------------------|-------------------------------------------|
| 2.42E+02 | 7.92E+00  | profilin 2          | TSC22 domain fa       | NM_053024,NM_053024,NM_002628             |
| 2.63E+02 | 8.04E+00  | golgi to ER traffic | golgi to ER traffic   | NM_015949 NM_015949                       |
| 3.24E+02 | 8.34E+00  | KIAA1644            | leucine zipper, di    | NM_001099294 NM_001099294                 |
| 2.72E+02 | 8.09E+00  | SRY (sex determi    | SRY (sex determi      | NM_006941 NM_006941                       |
| 2.72E+02 | 8.09E+00  | SRY (sex determi    | SRY (sex determi      | NM_006941 NM_006941                       |
| 2.65E+02 | 8.05E+00  | adenomatosis pc     | adenomatosis pc       | NM_005883 NM_005883                       |
| 2.65E+02 | 8.05E+00  | adenomatosis pc     | adenomatosis pc       | NM_005883 NM_005883                       |
| 2.65E+02 | 8.05E+00  | adenomatosis pc     | adenomatosis pc       | NM_005883 NM_005883                       |
| 4.18E-03 | -7.90E+00 | RAB20, member       | carbohydrate kin      | NM_017817 NM_017817                       |
| 3.81E-03 | -8.04E+00 | chromosome 1 o      | TAR DNA binding       | NM_173507 NM_173507                       |
| 3.81E-03 | -8.04E+00 | chromosome 1 o      | TAR DNA binding       | NM_173507 NM_173507                       |
| 3.57E+02 | 8.48E+00  | AHNAK nucleopr      | chromosome 14         | NM_138420 NM_138420                       |
| 3.57E+02 | 8.48E+00  | AHNAK nucleopr      | chromosome 14         | NM_138420 NM_138420                       |
| 2.37E+02 | 7.89E+00  | plectin             | plectin               | NM_000445,NM_000445,NM_201378,NM_201      |
| 2.42E+02 | 7.92E+00  | phosphatidylseri    | ribo                  | NM_030783 NM_030783                       |
| 2.42E+02 | 7.92E+00  | ribo                | ribo                  | NM_002939,NM_002939,NM_203383,NM_203      |
| 3.19E+02 | 8.32E+00  | zinc finger, AN1-   | UNC homeobox          | NM_182491 NM_182491                       |
| 3.19E+02 | 8.32E+00  | zinc finger, AN1-   | UNC homeobox          | NM_182491 NM_182491                       |
| 3.76E+02 | 8.56E+00  | family with sequi   | chromosome 22         | NM_015381 NM_015381                       |
| 3.76E+02 | 8.56E+00  | family with sequi   | chromosome 22         | NM_015381 NM_015381                       |
| 2.99E+02 | 8.22E+00  | calcium homeost     | calcium homeost       | NM_001001412 NM_001001412                 |
| 2.75E+02 | 8.10E+00  | phosphofructoki     | phosphofructoki       | NM_002626 NM_002626                       |
| 2.75E+02 | 8.10E+00  | phosphofructoki     | phosphofructoki       | NM_002626 NM_002626                       |
| 1.99E+00 | 9.94E-01  | BR serine/threon    | BR serine/threon      | NM_003957 NM_003957                       |
| 3.02E+02 | 8.24E+00  | prosaposin-like 1   | AFAP1 antisense       | NM_001085382 NM_001085382                 |
| 4.05E-03 | -7.95E+00 | ACN9 homolog (†     | ACN9 homolog (†       | NM_020186 NM_020186                       |
| 4.53E-03 | -7.78E+00 | chromosome 17       | zinc finger protei    | NM_022344 NM_022344                       |
| 7.43E-01 | -4.29E-01 | kaptin (actin binc  | N-ethylmaleimid       | NM_007059 NM_007059                       |
| 7.43E-01 | -4.29E-01 | kaptin (actin binc  | N-ethylmaleimid       | NM_007059 NM_007059                       |
| 2.93E+02 | 8.20E+00  | cell adhesion mo    | BUD13 homolog         | NM_014333,NM_014333,NM_001098517          |
| 4.37E-03 | -7.84E+00 | chromosome 6 o      | chromosome 6 o        | NM_018341 NM_018341                       |
| 1.59E+00 | 6.69E-01  | TAF4 RNA polym      | TAF4 RNA polym        | NM_003185 NM_003185                       |
| 1.59E+00 | 6.69E-01  | TAF4 RNA polym      | TAF4 RNA polym        | NM_003185 NM_003185                       |
| 4.72E-03 | -7.73E+00 | hematopoietic c     | golgin B1             | NM_005335 NM_005335                       |
| 3.40E+02 | 8.41E+00  | potassium voltag    | potassium voltag      | NM_172109 NM_172109                       |
| 2.31E+02 | 7.85E+00  | solute carrier fan  | solute carrier fan    | NM_213613,NM_213613,NM_022042             |
| 3.75E-03 | -8.06E+00 | DPH5 homolog (†     | sphingosine-1-ph      | NM_001077394, NM_001077394,NM_015958,NM_  |
| 2.38E+02 | 7.90E+00  | mesoderm induc      | mesoderm induc        | NM_017550 NM_017550                       |
| 3.47E+02 | 8.44E+00  | ring finger protei  | ring finger protei    | NM_178841 NM_178841                       |
| 3.47E+02 | 8.44E+00  | ring finger protei  | ring finger protei    | NM_178841 NM_178841                       |
| 3.76E+02 | 8.56E+00  | platelet-derived    | platelet-derived      | NM_002609 NM_002609                       |
| 3.76E+02 | 8.56E+00  | platelet-derived    | platelet-derived      | NM_002609 NM_002609                       |
| 4.37E+02 | 8.77E+00  | laminin, beta 2     | (I laminin, beta 2    | (I NM_002292 NM_002292                    |
| 4.76E-03 | -7.72E+00 | STEAP family me     | STEAP family me       | NM_024636 NM_024636                       |
| 3.34E-03 | -8.22E+00 | kelch-like 33       | (Drc O-sialoglycoprot | NM_001109997 NM_001109997                 |
| 1.76E+00 | 8.16E-01  | keratin 28          | keratin 28            | NM_181535 NM_181535                       |
| 1.76E+00 | 8.16E-01  | keratin 28          | keratin 28            | NM_181535 NM_181535                       |
| 1.42E+00 | 5.02E-01  | integrin, alpha X   | integrin, alpha X     | NM_000887 NM_000887                       |
| 1.42E+00 | 5.02E-01  | integrin, alpha X   | integrin, alpha X     | NM_000887 NM_000887                       |
| 4.16E+02 | 8.70E+00  | actin, beta-like 2  | actin, beta-like 2    | NM_001017992 NM_001017992                 |
| 4.16E+02 | 8.70E+00  | actin, beta-like 2  | actin, beta-like 2    | NM_001017992 NM_001017992                 |
| 3.95E-03 | -7.98E+00 | La ribonucleopro    | GTP binding prot      | NM_015155 NM_015155                       |
| 3.52E+02 | 8.46E+00  | laminin, beta 3     | laminin, beta 3       | NM_001017402, NM_001017402,NM_001127641,† |
| 3.25E+02 | 8.34E+00  | dysferlin, limb gii | dysferlin, limb gii   | NM_001130984, NM_001130984,NM_001130982,† |
| 3.25E+02 | 8.34E+00  | dysferlin, limb gii | dysferlin, limb gii   | NM_001130984, NM_001130984,NM_001130982,† |
| 3.80E-03 | -8.04E+00 | S100 calcium bin    | trichohyalin-like     | NM_005620 NM_005620                       |
| 3.80E-03 | -8.04E+00 | S100 calcium bin    | trichohyalin-like     | NM_005620 NM_005620                       |
| 5.49E-03 | -7.51E+00 | bromodomain, tr     | epoxide hydrolas      | NM_001726 NM_001726                       |

|          |           |                                       |                                      |              |
|----------|-----------|---------------------------------------|--------------------------------------|--------------|
| 1.63E+00 | 7.04E-01  | polymerase (RNA polymerase (RNA       | NM_005035                            | NM_005035    |
| 3.24E+02 | 8.34E+00  | solute carrier fan solute carrier fan | NM_194255                            | NM_194255    |
| 3.49E-03 | -8.16E+00 | cyclin I cyclin G2                    | NM_006835                            | NM_006835    |
| 4.98E-03 | -7.65E+00 | mediator comple mediator comple       | NM_004275                            | NM_004275    |
| 2.62E+02 | 8.03E+00  | fatty acid synth: fatty acid synth:   | NM_004104                            | NM_004104    |
| 2.62E+02 | 8.03E+00  | fatty acid synth: fatty acid synth:   | NM_004104                            | NM_004104    |
| 3.75E-03 | -8.06E+00 | E74-like factor 5 ets homologous      | NM_198381,NM_198381,NM_001422        |              |
| 2.45E+02 | 7.94E+00  | cyclin-dependent mitogen-activate     | NM_001009565                         | NM_001009565 |
| 2.45E+02 | 7.94E+00  | cyclin-dependent mitogen-activate     | NM_001009565                         | NM_001009565 |
| 3.30E+02 | 8.36E+00  | solute carrier fan solute carrier fan | NM_006934,NM_006934,NM_201649,NM_001 |              |
| 3.30E+02 | 8.36E+00  | solute carrier fan solute carrier fan | NM_006934,NM_006934,NM_201649,NM_001 |              |
| 4.88E-03 | -7.68E+00 | phosphatidylinos phosphatidylinos     | NM_025163                            | NM_025163    |
| 4.88E-03 | -7.68E+00 | phosphatidylinos phosphatidylinos     | NM_025163                            | NM_025163    |
| 3.17E+02 | 8.31E+00  | programmed cell programmed cell       | NM_005018                            | NM_005018    |
| 3.57E+02 | 8.48E+00  | small nucleolar R small nucleolar R   | NR_003322,NR_003322,NR_003320        |              |
| 1.80E+00 | 8.46E-01  | WD repeat doma WD repeat doma         | NM_017818                            | NM_017818    |
| 1.80E+00 | 8.46E-01  | WD repeat doma WD repeat doma         | NM_017818                            | NM_017818    |
| 2.22E+02 | 7.79E+00  | Rap guanine nucl interleukin 6 (int   | NM_012294                            | NM_012294    |
| 2.22E+02 | 7.79E+00  | Rap guanine nucl interleukin 6 (int   | NM_012294                            | NM_012294    |
| 3.22E+02 | 8.33E+00  | ATPase, class VI, ATPase, class VI,   | NM_032189,NM_032189,NM_015205        |              |
| 1.95E+00 | 9.66E-01  | hypothetical LOC coxsackie virus a    | NR_026756                            | NR_026756    |
| 1.95E+00 | 9.66E-01  | hypothetical LOC coxsackie virus a    | NR_026756                            | NR_026756    |
| 3.38E+02 | 8.40E+00  | chloride channel chloride channel     | NM_001287,NM_001287,NM_001114331     |              |
| 2.11E+02 | 7.72E+00  | adenylate cyclas adenylate cyclas     | NM_183357                            | NM_183357    |
| 2.11E+02 | 7.72E+00  | adenylate cyclas adenylate cyclas     | NM_183357                            | NM_183357    |
| 2.17E+02 | 7.76E+00  | splicing factor, a matrix metallope   | NM_004592                            | NM_004592    |
| 3.21E-03 | -8.28E+00 | potassium voltag follicle stimulatir  | NM_002233                            | NM_002233    |
| 3.82E-03 | -8.03E+00 | BEN domain con shisa homolog 3        | NM_001159547, NM_001159547,NM_207406 |              |
| 4.43E-03 | -7.82E+00 | ASAP1 intronic tr adenylate cyclas    | NR_002765                            | NR_002765    |
| 4.43E-03 | -7.82E+00 | ASAP1 intronic tr adenylate cyclas    | NR_002765                            | NR_002765    |
| 3.45E-03 | -8.18E+00 | SP140 nuclear bc SP100 nuclear ar     | NM_138402                            | NM_138402    |
| 3.45E-03 | -8.18E+00 | SP140 nuclear bc SP100 nuclear ar     | NM_138402                            | NM_138402    |
| 3.94E+02 | 8.62E+00  | trafficking protei trafficking protei | NM_031466                            | NM_031466    |
| 3.79E-03 | -8.04E+00 | dystrophia myot radial spoke heat     | NM_004943                            | NM_004943    |
| 4.01E-03 | -7.96E+00 | StAR-related lipic StAR-related lipic | NM_178007,NM_178007,NM_052851,NM_178 |              |
| 4.01E-03 | -7.96E+00 | StAR-related lipic replication facto  | NM_178007,NM_178007,NM_052851,NM_178 |              |
| 3.05E+02 | 8.25E+00  | lipase, member f SUMO1/sentrin/       | NM_139248                            | NM_139248    |
| 3.05E+02 | 8.25E+00  | lipase, member f SUMO1/sentrin/       | NM_139248                            | NM_139248    |
| 3.97E-03 | -7.98E+00 | stathmin 1 platelet-activatin         | NM_203401,NM_203401,NM_005563,NM_203 |              |
| 3.97E-03 | -7.98E+00 | stathmin 1 platelet-activatin         | NM_203401,NM_203401,NM_005563,NM_203 |              |
| 1.31E+00 | 3.95E-01  | cancer/testis ant cancer/testis ant   | NM_001017436                         | NM_001017436 |
| 1.31E+00 | 3.95E-01  | cancer/testis ant cancer/testis ant   | NM_001017436                         | NM_001017436 |
| 1.31E+00 | 3.95E-01  | cancer/testis ant cancer/testis ant   | NM_001017436                         | NM_001017436 |
| 3.83E+02 | 8.58E+00  | cysteine-rich pro cysteine-rich pro   | NM_001312                            | NM_001312    |
| 3.83E+02 | 8.58E+00  | cysteine-rich pro cysteine-rich pro   | NM_001312                            | NM_001312    |
| 1.30E+00 | 3.83E-01  | Ras association ( Ras association (   | NM_014737                            | NM_014737    |
| 2.67E+02 | 8.06E+00  | integrin, beta 4 integrin, beta 4     | NM_001005619                         | NM_001005619 |
| 2.67E+02 | 8.06E+00  | integrin, beta 4 integrin, beta 4     | NM_001005619                         | NM_001005619 |
| 2.67E+02 | 8.06E+00  | integrin, beta 4 integrin, beta 4     | NM_001005619                         | NM_001005619 |
| 3.74E+02 | 8.55E+00  | galactosamine (N galactosamine (N     | NM_000512                            | NM_000512    |
| 3.74E+02 | 8.55E+00  | galactosamine (N galactosamine (N     | NM_000512                            | NM_000512    |
| 3.46E+02 | 8.43E+00  | chromosome 2 o chromosome 2 o         | NM_001013662                         | NM_001013662 |
| 3.46E+02 | 8.43E+00  | chromosome 2 o chromosome 2 o         | NM_001013662                         | NM_001013662 |
| 3.89E+02 | 8.60E+00  | diacylglycerol kin diacylglycerol kir | NM_152879                            | NM_152879    |
| 5.02E-03 | -7.64E+00 | renalase, FAD-de lipase, family me    | NM_001031709                         | NM_001031709 |
| 2.67E+02 | 8.06E+00  | neuroligin 2 neuroligin 2             | NM_020795                            | NM_020795    |
| 3.23E+02 | 8.33E+00  | NK2 homeobox E paired box 9           | NM_014360                            | NM_014360    |
| 3.23E+02 | 8.33E+00  | NK2 homeobox E paired box 9           | NM_014360                            | NM_014360    |

|          |           |                                       |                                          |                                          |
|----------|-----------|---------------------------------------|------------------------------------------|------------------------------------------|
| 3.23E+02 | 8.33E+00  | NK2 homeobox ε paired box 9           | NM_014360                                | NM_014360                                |
| 2.18E+02 | 7.77E+00  | wingless-type MI wingless-type MI     | NM_058238                                | NM_058238                                |
| 2.18E+02 | 7.77E+00  | wingless-type MI wingless-type MI     | NM_058238                                | NM_058238                                |
| 2.46E+02 | 7.94E+00  | zinc finger protei zinc finger protei | NM_153813                                | NM_153813                                |
| 2.45E+02 | 7.94E+00  | CDC42 binding pı zinc finger protei   | NM_014826,NM_014826,NM_003607            | NM_014826,NM_014826,NM_003607            |
| 2.45E+02 | 7.94E+00  | CDC42 binding pı zinc finger protei   | NM_014826,NM_014826,NM_003607            | NM_014826,NM_014826,NM_003607            |
| 2.97E+02 | 8.22E+00  | fibroblast growth fibroblast growth   | NM_020637                                | NM_020637                                |
| 2.97E+02 | 8.22E+00  | fibroblast growth fibroblast growth   | NM_020637                                | NM_020637                                |
| 3.22E-03 | -8.28E+00 | heart and neural La ribonucleopro     | NM_004821                                | NM_004821                                |
| 3.22E-03 | -8.28E+00 | heart and neural La ribonucleopro     | NM_004821                                | NM_004821                                |
| 5.04E-03 | -7.63E+00 | transmembrane transmembrane           | NM_020422                                | NM_020422                                |
| 2.93E+02 | 8.20E+00  | solute carrier fan solute carrier fan | NM_031481                                | NM_031481                                |
| 2.61E+02 | 8.03E+00  | transmembrane transmembrane           | NM_021259                                | NM_021259                                |
| 2.61E+02 | 8.03E+00  | transmembrane transmembrane           | NM_021259                                | NM_021259                                |
| 3.59E+02 | 8.49E+00  | chromosome 9 o chromosome 9 o         | NM_017995,NM_017995,NM_024718            | NM_017995,NM_017995,NM_024718            |
| 3.59E+02 | 8.49E+00  | chromosome 9 o chromosome 9 o         | NM_017995,NM_017995,NM_024718            | NM_017995,NM_017995,NM_024718            |
| 4.64E-03 | -7.75E+00 | BCL2-related pro zinc finger, AN1-i   | NM_004049,NM_004049,NM_001114735         | NM_004049,NM_004049,NM_001114735         |
| 4.78E-03 | -7.71E+00 | family with sequ mitochondrial rik    | NM_001135032, NM_001135032,NM_032181     | NM_001135032, NM_001135032,NM_032181     |
| 3.79E-03 | -8.04E+00 | aldehyde dehydr family with sequ      | NM_000695,NM_000695,NM_001031615         | NM_000695,NM_000695,NM_001031615         |
| 3.79E-03 | -8.04E+00 | aldehyde dehydr family with sequ      | NM_000695,NM_000695,NM_001031615         | NM_000695,NM_000695,NM_001031615         |
| 1.78E+00 | 8.28E-01  | cytochrome P45( cytochrome P45(       | NM_000774                                | NM_000774                                |
| 1.78E+00 | 8.28E-01  | cytochrome P45( cytochrome P45(       | NM_000774                                | NM_000774                                |
| 3.16E+02 | 8.30E+00  | kelch-like 17 (Drc kelch-like 17 (Drc | NM_198317                                | NM_198317                                |
| 2.78E+02 | 8.12E+00  | transcription fact extracellular leuc | NR_001288                                | NR_001288                                |
| 2.78E+02 | 8.12E+00  | transcription fact extracellular leuc | NR_001288                                | NR_001288                                |
| 4.30E-03 | -7.86E+00 | SKI family transci protein inhibitor  | NM_001031807                             | NM_001031807                             |
| 4.30E-03 | -7.86E+00 | SKI family transci protein inhibitor  | NM_001031807                             | NM_001031807                             |
| 2.38E+02 | 7.90E+00  | junctophilin 3 junctophilin 3         | NM_020655                                | NM_020655                                |
| 4.61E-03 | -7.76E+00 | eukaryotic transl eukaryotic transl   | NM_017629                                | NM_017629                                |
| 3.44E-03 | -8.18E+00 | transcription ter chromosome 9 o      | NM_007344                                | NM_007344                                |
| 3.44E-03 | -8.18E+00 | transcription ter chromosome 9 o      | NM_007344                                | NM_007344                                |
| 4.43E-03 | -7.82E+00 | ring finger protei WD repeat dom      | NM_145051                                | NM_145051                                |
| 4.43E-03 | -7.82E+00 | ring finger protei WD repeat dom      | NM_145051                                | NM_145051                                |
| 4.43E-03 | -7.82E+00 | ring finger protei WD repeat dom      | NM_145051                                | NM_145051                                |
| 4.02E-03 | -7.96E+00 | glutathione redu UBX domain prot      | NM_000637                                | NM_000637                                |
| 4.02E-03 | -7.96E+00 | glutathione redu UBX domain prot      | NM_000637                                | NM_000637                                |
| 3.06E+02 | 8.26E+00  | pleckstrin homol solute carrier fan   | NM_015164                                | NM_015164                                |
| 1.42E+00 | 5.09E-01  | matrix metallope matrix metallope     | NM_016155                                | NM_016155                                |
| 1.36E+00 | 4.39E-01  | cancer/testis ant cancer/testis ant   | NM_001017417                             | NM_001017417                             |
| 1.36E+00 | 4.39E-01  | cancer/testis ant cancer/testis ant   | NM_001017436, NM_001017436,NM_152582     | NM_001017436, NM_001017436,NM_152582     |
| 2.31E+02 | 7.85E+00  | calcium channel, calcium channel,     | NM_021098,NM_021098,NM_001005407         | NM_021098,NM_021098,NM_001005407         |
| 2.31E+02 | 7.85E+00  | calcium channel, calcium channel,     | NM_021098,NM_021098,NM_001005407         | NM_021098,NM_021098,NM_001005407         |
| 3.45E-03 | -8.18E+00 | CD47 molecule intraflagellar trar     | NM_001777,NM_001777,NM_198793,NM_001     | NM_001777,NM_001777,NM_198793,NM_001     |
| 3.49E+02 | 8.45E+00  | zinc finger protei zinc finger protei | NM_001002836                             | NM_001002836                             |
| 2.61E+02 | 8.03E+00  | surfactant associ NK2 homeobox 1      | NM_001101341                             | NM_001101341                             |
| 2.61E+02 | 8.03E+00  | surfactant associ NK2 homeobox 1      | NM_001101341                             | NM_001101341                             |
| 3.57E+02 | 8.48E+00  | histamine recept histamine recept     | NM_001098212                             | NM_001098212                             |
| 2.86E+02 | 8.16E+00  | tetraspanin 14 SH2 domain conti       | NM_030927,NM_030927,NM_001128309         | NM_030927,NM_030927,NM_001128309         |
| 4.38E-03 | -7.83E+00 | mitochondrial fis mitochondrial fis   | NM_014637,NM_014637,NM_001145839         | NM_014637,NM_014637,NM_001145839         |
| 3.55E+02 | 8.47E+00  | BAl1-associated   BAl1-associated     | NM_017450,NM_017450,NM_006340,NM_017     | NM_017450,NM_017450,NM_006340,NM_017     |
| 3.55E+02 | 8.47E+00  | BAl1-associated   BAl1-associated     | NM_017450,NM_017450,NM_006340,NM_017     | NM_017450,NM_017450,NM_006340,NM_017     |
| 4.21E-03 | -7.89E+00 | motilin glutamate recept              | NM_002418,NM_002418,NM_001040109         | NM_002418,NM_002418,NM_001040109         |
| 3.00E+02 | 8.23E+00  | zinc finger protei zinc finger protei | NM_001127464                             | NM_001127464                             |
| 3.00E+02 | 8.23E+00  | zinc finger protei zinc finger protei | NM_001127464                             | NM_001127464                             |
| 3.57E-03 | -8.13E+00 | chromosome 7 o monoacylglycerc        | NM_198571                                | NM_198571                                |
| 2.98E+02 | 8.22E+00  | protein tyrosine paralemmin 2         | NM_001145368, NM_001145368,NM_002829,NM_ | NM_001145368, NM_001145368,NM_002829,NM_ |
| 2.98E+02 | 8.22E+00  | protein tyrosine paralemmin 2         | NM_001145368, NM_001145368,NM_002829,NM_ | NM_001145368, NM_001145368,NM_002829,NM_ |
| 4.68E-03 | -7.74E+00 | protease, serine, protease, serine,   | NM_001080492                             | NM_001080492                             |

|          |           |                                                                             |
|----------|-----------|-----------------------------------------------------------------------------|
| 3.22E+02 | 8.33E+00  | mannosyl (alpha- mannosyl (alpha- NM_014275,NM NM_014275,NM_054013          |
| 3.90E-03 | -8.00E+00 | gamma-glutamyl DiGeorge syndro NR_003267 NR_003267                          |
| 2.34E+02 | 7.87E+00  | nuclear transcrip nuclear transcrip NM_002505,NM NM_002505,NM_021705        |
| 1.65E+00 | 7.23E-01  | parvin, gamma parvin, gamma NM_001137605, NM_001137605,NR_024427            |
| 4.04E+02 | 8.66E+00  | dead end homol dead end homol NM_194249 NM_194249                           |
| 2.64E+02 | 8.04E+00  | FKSG29 transmembrane NR_024013 NR_024013                                    |
| 3.62E+02 | 8.50E+00  | multiple EGF-like multiple EGF-like NM_001410 NM_001410                     |
| 1.44E+00 | 5.22E-01  | similar to cDNA s similar to cDNA s NM_001013729 NM_001013729               |
| 4.38E-03 | -7.83E+00 | arylsulfatase A SH3 and multiple NM_001085427, NM_001085427,NM_001085428,N  |
| 2.86E+02 | 8.16E+00  | small nucleolar R small nucleolar R NR_002969 NR_002969                     |
| 3.08E-03 | -8.34E+00 | KIAA1324 KIAA1324 NM_020775 NM_020775                                       |
| 1.91E+00 | 9.33E-01  | potassium voltag potassium voltag NM_172056 NM_172056                       |
| 1.91E+00 | 9.33E-01  | potassium voltag potassium voltag NM_172056 NM_172056                       |
| 3.08E+02 | 8.27E+00  | ring finger protei ring finger protei NM_174903 NM_174903                   |
| 2.58E+02 | 8.01E+00  | zinc finger and B' zinc finger and B' NM_032792 NM_032792                   |
| 1.45E+00 | 5.36E-01  | pecanex-like 3 (C pecanex-like 3 (C NM_032223 NM_032223                     |
| 1.45E+00 | 5.36E-01  | pecanex-like 3 (C pecanex-like 3 (C NM_032223 NM_032223                     |
| 3.68E-03 | -8.09E+00 | leucine rich repe leucine rich repe NM_024750,NM NM_024750,NM_024512        |
| 3.68E-03 | -8.09E+00 | teratocarcinoma teratocarcinoma NM_003212 NM_003212                         |
| 4.61E-03 | -7.76E+00 | olfactory receptc olfactory receptc NM_013936 NM_013936                     |
| 3.81E+02 | 8.57E+00  | pyrimidinergic re pyrimidinergic re NM_004154 NM_004154                     |
| 3.95E-03 | -7.98E+00 | ankyrin repeat d RANBP2-like and NM_023016 NM_023016                        |
| 3.70E+02 | 8.53E+00  | non-metastatic c non-metastatic c NM_005009 NM_005009                       |
| 3.23E-03 | -8.27E+00 | leucine-rich repe leucine-rich repe NM_021636 NM_021636                     |
| 2.50E+02 | 7.96E+00  | BAI1-associated   BAI1-associated   NM_017450,NM NM_017450,NM_006340,NM_017 |
| 2.50E+02 | 7.96E+00  | BAI1-associated   BAI1-associated   NM_017450,NM NM_017450,NM_006340,NM_017 |
| 3.67E+02 | 8.52E+00  | exosome compo DDB1 and CUL4 : NM_001002269, NM_001002269,NM_016042          |
| 3.45E+02 | 8.43E+00  | lysine (K)-specific lysine (K)-specific NM_015015 NM_015015                 |
| 1.54E+00 | 6.20E-01  | BTG3 associated zinc finger protei NM_017869,NM NM_017869,NM_079837         |
| 1.54E+00 | 6.20E-01  | BTG3 associated zinc finger protei NM_017869,NM NM_017869,NM_079837         |
| 1.46E+00 | 5.51E-01  | cancer/testis ant cancer/testis ant NM_001007551 NM_001007551               |
| 4.88E-03 | -7.68E+00 | anoctamin 6 anoctamin 6 NM_001142680 NM_001142680                           |
| 4.88E-03 | -7.68E+00 | anoctamin 6 anoctamin 6 NM_001142680 NM_001142680                           |
| 3.80E-03 | -8.04E+00 | CD177 molecule testis expressed NM_020406 NM_020406                         |
| 3.80E-03 | -8.04E+00 | CD177 molecule testis expressed NM_020406 NM_020406                         |
| 2.89E+02 | 8.17E+00  | multiple EGF-like multiple EGF-like NM_001409 NM_001409                     |
| 2.89E+02 | 8.17E+00  | multiple EGF-like multiple EGF-like NM_001409 NM_001409                     |
| 3.69E-03 | -8.08E+00 | solute carrier fan solute carrier fan NM_003058 NM_003058                   |
| 3.26E+02 | 8.35E+00  | polymerase (DN/ polymerase (DN/ NM_002691 NM_002691                         |
| 3.26E+02 | 8.35E+00  | polymerase (DN/ polymerase (DN/ NM_002691 NM_002691                         |
| 2.03E+00 | 1.02E+00  | coiled-coil domai chromosome 2 o NM_138770 NM_138770                        |
| 2.03E+00 | 1.02E+00  | coiled-coil domai chromosome 2 o NM_138770 NM_138770                        |
| 3.22E-03 | -8.28E+00 | potassium chann hypothetical LOC NM_001142730, NM_001142730,NM_001136205,N  |
| 3.84E+02 | 8.58E+00  | keratin 13 keratin 13 NM_153490,NM NM_153490,NM_002274                      |
| 2.67E+02 | 8.06E+00  | proline-serine-th proline-serine-th NM_003978 NM_003978                     |
| 2.67E+02 | 8.06E+00  | proline-serine-th proline-serine-th NM_003978 NM_003978                     |
| 3.53E+02 | 8.46E+00  | kinesin family m kinesin family m NM_015656 NM_015656                       |
| 3.39E-03 | -8.20E+00 | chromosome 22 bromodomain cc NR_026997 NR_026997                            |
| 3.21E-03 | -8.28E+00 | potassium voltag follicle stimulatir NM_002233 NM_002233                    |
| 3.77E-03 | -8.05E+00 | HECT domain coi HEAT repeat con NM_015382 NM_015382                         |
| 3.77E-03 | -8.05E+00 | HECT domain coi HEAT repeat con NM_015382 NM_015382                         |
| 3.77E-03 | -8.05E+00 | nuclear RNA expi thymosin beta 1! NM_017809,NM NM_017809,NM_022053          |
| 4.83E-03 | -7.69E+00 | hypothetical LOC ubiquitin specific NR_024490 NR_024490                     |
| 4.83E-03 | -7.69E+00 | hypothetical LOC ubiquitin specific NR_024490 NR_024490                     |
| 3.61E-03 | -8.11E+00 | nuclear receptor nuclear receptor NM_003269 NM_003269                       |
| 3.61E-03 | -8.11E+00 | nuclear receptor nuclear receptor NM_003269 NM_003269                       |
| 1.33E+00 | 4.12E-01  | protein arginine protein arginine NM_198318,NM NM_198318,NM_198319,NM_001   |
| 1.33E+00 | 4.12E-01  | protein arginine protein arginine NM_198318,NM NM_198318,NM_198319,NM_001   |



|          |           |                                       |                                           |              |
|----------|-----------|---------------------------------------|-------------------------------------------|--------------|
| 1.33E+00 | 4.12E-01  | chromosome 19 chromosome 19           | NM_001101340                              | NM_001101340 |
| 1.85E+00 | 8.89E-01  | transmembrane transmembrane           | NM_021259                                 | NM_021259    |
| 1.85E+00 | 8.89E-01  | transmembrane transmembrane           | NM_021259                                 | NM_021259    |
| 2.86E+02 | 8.16E+00  | tetraspanin 14 SH2 domain cont        | NM_030927,NM_030927,NM_001128309          |              |
| 1.84E+00 | 8.80E-01  | DIP2 disco-intera DIP2 disco-intera   | NM_014974                                 | NM_014974    |
| 3.46E+02 | 8.43E+00  | solute carrier fan solute carrier fan | NM_032034                                 | NM_032034    |
| 4.01E+02 | 8.65E+00  | neurexin 1 ankyrin repeat a           | NM_138735,NM_138735,NM_004801,NM_001      |              |
| 3.90E-03 | -8.00E+00 | zinc finger and S zinc finger protei  | NM_024303                                 | NM_024303    |
| 2.56E+02 | 8.00E+00  | reticulon 4 recep reticulon 4 recep   | NM_023004                                 | NM_023004    |
| 2.27E+00 | 1.18E+00  | NK6 homeobox 2 chromosome 10          | NM_177400                                 | NM_177400    |
| 4.18E-03 | -7.90E+00 | Paf1, RNA polym Paf1, RNA polym       | NM_019088                                 | NM_019088    |
| 4.18E-03 | -7.90E+00 | Paf1, RNA polym Paf1, RNA polym       | NM_019088                                 | NM_019088    |
| 4.92E-03 | -7.67E+00 | protein kinase, A UDP-N-acetyl-alf    | NM_016203,NM_016203,NM_001040633,NM_      |              |
| 3.49E+02 | 8.45E+00  | nuclear respirato ubiquitin-conjug;   | NM_001040110                              | NM_001040110 |
| 2.83E+02 | 8.14E+00  | family with sequi platelet-derived ;  | NM_020223                                 | NM_020223    |
| 2.10E+02 | 7.72E+00  | RNA binding mot RNA binding mot       | NM_001145346                              | NM_001145346 |
| 1.63E+00 | 7.04E-01  | protein tyrosine protein tyrosine     | NM_130842,NM_130842,NM_130843,NM_002      |              |
| 1.63E+00 | 7.04E-01  | protein tyrosine protein tyrosine     | NM_130842,NM_130842,NM_130843,NM_002      |              |
| 4.06E-03 | -7.94E+00 | transmembrane aminocarboxymu          | NM_030923                                 | NM_030923    |
| 2.35E+02 | 7.88E+00  | ankyrin repeat d phosphoglucomu       | NM_001012419, NM_001012419,NM_032250      |              |
| 3.09E+02 | 8.27E+00  | BTB (POZ) domai BTB (POZ) domai       | NM_017797                                 | NM_017797    |
| 3.09E+02 | 8.27E+00  | BTB (POZ) domai BTB (POZ) domai       | NM_017797                                 | NM_017797    |
| 1.73E+00 | 7.92E-01  | olfactory receptc olfactory receptc   | NM_001004695                              | NM_001004695 |
| 1.73E+00 | 7.92E-01  | olfactory receptc olfactory receptc   | NM_001004692                              | NM_001004692 |
| 2.04E+02 | 7.67E+00  | aldo-keto reduct aldo-keto reduct     | NM_020299                                 | NM_020299    |
| 3.70E+02 | 8.53E+00  | RAD54-like 2 (S. testis expressed ;   | NM_015106                                 | NM_015106    |
| 2.76E+02 | 8.11E+00  | mitogen-activate mitogen-activate     | NM_145109                                 | NM_145109    |
| 3.21E-03 | -8.29E+00 | chromosome 6 o chromosome 6 o         | NR_026736,NR_026736,NR_026737,NM_0011     |              |
| 2.20E+02 | 7.78E+00  | caspase recruitm caspase recruitm     | NM_052814,NM_052814,NM_052813             |              |
| 2.20E+02 | 7.78E+00  | caspase recruitm caspase recruitm     | NM_052814,NM_052814,NM_052813             |              |
| 3.41E+02 | 8.41E+00  | pyrroline-5-carbc pyrroline-5-carbc   | NM_006907                                 | NM_006907    |
| 1.38E+00 | 4.64E-01  | glutamate-rich 1 discs, large (Dros   | NM_207332                                 | NM_207332    |
| 1.38E+00 | 4.64E-01  | glutamate-rich 1 discs, large (Dros   | NM_207332                                 | NM_207332    |
| 1.38E+00 | 4.64E-01  | glutamate-rich 1 discs, large (Dros   | NM_207332                                 | NM_207332    |
| 1.38E+00 | 4.64E-01  | glutamate-rich 1 discs, large (Dros   | NM_207332                                 | NM_207332    |
| 4.66E-03 | -7.75E+00 | natural cytotoxic allograft inflamr   | NM_001145467                              | NM_001145467 |
| 3.87E-03 | -8.01E+00 | calsequestrin 2 ( nescent helix loc   | NM_001232                                 | NM_001232    |
| 3.01E+02 | 8.23E+00  | adrenergic, beta, myosin XVIIIb       | NM_005160                                 | NM_005160    |
| 2.95E+02 | 8.21E+00  | trinucleotide rep trinucleotide rep   | NM_001080495                              | NM_001080495 |
| 2.98E+02 | 8.22E+00  | C-type lectin don C-type lectin don   | NM_015226                                 | NM_015226    |
| 2.98E+02 | 8.22E+00  | C-type lectin don C-type lectin don   | NM_015226                                 | NM_015226    |
| 2.87E+02 | 8.16E+00  | glycosyltransfera glycosyltransfera   | NM_024656                                 | NM_024656    |
| 2.37E+02 | 7.89E+00  | NIMA (never in n NIMA (never in n     | NM_178170                                 | NM_178170    |
| 3.60E-03 | -8.12E+00 | low density lipop hypothetical FLJ4   | NM_017522,NM_017522,NM_004631,NM_001      |              |
| 2.50E+02 | 7.97E+00  | BTG3 associated BTG3 associated       | NM_017869,NM_017869,NM_079837             |              |
| 3.09E-03 | -8.34E+00 | translocase of ini arginyl aminopef   | NM_006335                                 | NM_006335    |
| 3.09E-03 | -8.34E+00 | translocase of ini arginyl aminopef   | NM_006335                                 | NM_006335    |
| 2.74E+02 | 8.10E+00  | tyrosine kinase w tyrosine kinase w   | NM_005424                                 | NM_005424    |
| 2.74E+02 | 8.10E+00  | tyrosine kinase w tyrosine kinase w   | NM_005424                                 | NM_005424    |
| 4.11E-03 | -7.93E+00 | solute carrier fan CD37 molecule      | NM_014037                                 | NM_014037    |
| 4.11E-03 | -7.93E+00 | solute carrier fan CD37 molecule      | NM_014037                                 | NM_014037    |
| 3.64E+02 | 8.51E+00  | acid phosphatase acid phosphatase     | NM_001111036, NM_001111036,NM_001111035,N |              |
| 1.55E+00 | 6.36E-01  | chromosome 10 G protein-couple        | NM_173572                                 | NM_173572    |
| 2.88E+02 | 8.17E+00  | calcium channel, calcium channel,     | NM_021098,NM_021098,NM_001005407          |              |
| 2.88E+02 | 8.17E+00  | calcium channel, calcium channel,     | NM_021098,NM_021098,NM_001005407          |              |
| 4.18E-03 | -7.90E+00 | olfactory receptc olfactory receptc   | NM_030901                                 | NM_030901    |
| 4.67E+02 | 8.87E+00  | cadherin 4, type cadherin 4, type     | NM_001794                                 | NM_001794    |
| 4.67E+02 | 8.87E+00  | cadherin 4, type cadherin 4, type     | NM_001794                                 | NM_001794    |

|          |           |                                                                                 |                                          |
|----------|-----------|---------------------------------------------------------------------------------|------------------------------------------|
| 2.76E+02 | 8.11E+00  | mitogen-activate mitogen-activate NM_145109                                     | NM_145109                                |
| 1.54E+00 | 6.20E-01  | sodium channel, sodium channel, NM_000334                                       | NM_000334                                |
| 3.51E+02 | 8.46E+00  | ring finger protei ring finger protei NM_194460                                 | NM_194460                                |
| 2.59E+02 | 8.02E+00  | WD repeat domæ hypothetical LOC NM_018051                                       | NM_018051                                |
| 2.59E+02 | 8.02E+00  | WD repeat domæ hypothetical LOC NM_018051                                       | NM_018051                                |
| 3.57E-03 | -8.13E+00 | lysine-rich coiled SET and MYND d NM_016618                                     | NM_016618                                |
| 2.75E+02 | 8.10E+00  | renal tumor antię renal tumor antię NM_014226                                   | NM_014226                                |
| 6.30E-01 | -6.67E-01 | cytochrome P45(echinoderm micr NM_006668                                        | NM_006668                                |
| 1.27E+00 | 3.45E-01  | X antigen family, X antigen family, NM_001079538                                | NM_001079538                             |
| 1.27E+00 | 3.45E-01  | X antigen family, X antigen family, NM_001079538                                | NM_001079538                             |
| 1.45E+00 | 5.37E-01  | ST3 beta-galacto zinc finger and A' NM_173344,NM_173344,NM_003033               | NM_173344,NM_173344,NM_003033            |
| 1.45E+00 | 5.37E-01  | ST3 beta-galacto zinc finger and A' NM_173344,NM_173344,NM_003033               | NM_173344,NM_173344,NM_003033            |
| 1.45E+00 | 5.37E-01  | ST3 beta-galacto zinc finger and A' NM_173344,NM_173344,NM_003033               | NM_173344,NM_173344,NM_003033            |
| 1.45E+00 | 5.37E-01  | ST3 beta-galacto zinc finger and A' NM_173344,NM_173344,NM_003033               | NM_173344,NM_173344,NM_003033            |
| 1.45E+00 | 5.37E-01  | ST3 beta-galacto zinc finger and A' NM_173344,NM_173344,NM_003033               | NM_173344,NM_173344,NM_003033            |
| 2.38E+02 | 7.90E+00  | RGD motif, leucir RGD motif, leucir NM_001013838                                | NM_001013838                             |
| 1.69E+00 | 7.57E-01  | sorting nexin 29 sorting nexin 29 NM_001080530                                  | NM_001080530                             |
| 1.69E+00 | 7.57E-01  | sorting nexin 29 sorting nexin 29 NM_001080530                                  | NM_001080530                             |
| 3.68E-03 | -8.09E+00 | fibroblast growth arginyltransferas NM_001144913, NM_001144913,NM_001144919     | NM_001144913,NM_001144913,NM_001144919   |
| 3.89E+02 | 8.60E+00  | non-protein codi non-protein codi NR_024422                                     | NR_024422                                |
| 3.89E+02 | 8.60E+00  | non-protein codi non-protein codi NR_024422                                     | NR_024422                                |
| 4.11E-03 | -7.93E+00 | adenylate cyclas adenylate cyclas NM_018417                                     | NM_018417                                |
| 4.11E-03 | -7.93E+00 | adenylate cyclas adenylate cyclas NM_018417                                     | NM_018417                                |
| 3.90E-03 | -8.00E+00 | neuritin 1 neuritin 1 NM_016588                                                 | NM_016588                                |
| 2.18E+02 | 7.77E+00  | family with sequ scribbled homolc NM_198488                                     | NM_198488                                |
| 4.23E+02 | 8.72E+00  | nuclear receptor nuclear receptor NM_006312,NM_006312,NM_001077261              | NM_006312,NM_006312,NM_001077261         |
| 1.58E+00 | 6.59E-01  | hexaribonucleoti hexaribonucleoti NM_001082575                                  | NM_001082575                             |
| 1.58E+00 | 6.59E-01  | hexaribonucleoti hexaribonucleoti NM_001082575                                  | NM_001082575                             |
| 2.75E+02 | 8.10E+00  | strawberry notc serine/threonine NM_001100122, NM_001100122,NM_014963           | NM_001100122,NM_001100122,NM_014963      |
| 3.76E-03 | -8.05E+00 | solute carrier fan platelet-derived ; NM_001008539                              | NM_001008539                             |
| 3.76E-03 | -8.05E+00 | solute carrier fan platelet-derived ; NM_001008539                              | NM_001008539                             |
| 1.42E+00 | 5.05E-01  | chromosome 21 heat shock transi NR_026863                                       | NR_026863                                |
| 2.77E-03 | -8.49E+00 | Xg pseudogene, `Xg pseudogene, ` NR_003254                                      | NR_003254                                |
| 1.18E+00 | 2.41E-01  | steroid-5-alpha-r mediator of cell ; NM_000348                                  | NM_000348                                |
| 1.88E+00 | 9.09E-01  | hypothetical LOC hypothetical LOC NR_024394                                     | NR_024394                                |
| 3.19E-03 | -8.29E+00 | Hermansky-Pudl; Hermansky-Pudl; NM_022081,NM_022081,NM_152841                   | NM_022081,NM_022081,NM_152841            |
| 3.98E+02 | 8.64E+00  | glutamate decarl glutamate decarl NM_013445,NM_013445,NM_000817                 | NM_013445,NM_013445,NM_000817            |
| 3.98E+02 | 8.64E+00  | glutamate decarl glutamate decarl NM_013445,NM_013445,NM_000817                 | NM_013445,NM_013445,NM_000817            |
| 3.82E+02 | 8.58E+00  | WD repeat domæ glutamate recept NM_024100                                       | NM_024100                                |
| 2.97E+02 | 8.22E+00  | tubulin tyrosine I tubulin tyrosine I NM_001139442                              | NM_001139442                             |
| 2.97E+02 | 8.22E+00  | tubulin tyrosine I tubulin tyrosine I NM_001139442                              | NM_001139442                             |
| 2.81E-03 | -8.47E+00 | eukaryotic transl eukaryotic transl NM_001135652, NM_001135652,NM_001135651,N   | NM_001135652,NM_001135652,NM_001135651,N |
| 4.48E-03 | -7.80E+00 | histone cluster 1, histone cluster 1, NM_005320                                 | NM_005320                                |
| 3.65E+02 | 8.51E+00  | ankyrin repeat d; ankyrin repeat d; NR_026556                                   | NR_026556                                |
| 1.56E+00 | 6.41E-01  | family with sequ hippocampus abi NM_017561                                      | NM_017561                                |
| 3.75E-03 | -8.06E+00 | zinc finger protei zinc finger protei NM_001099284, NM_001099284,NM_001099283,N | NM_001099284,NM_001099284,NM_001099283,N |
| 4.16E-03 | -7.91E+00 | ATG16 autophag ATG16 autophag NM_030803,NM_030803,NM_017974                     | NM_030803,NM_030803,NM_017974            |
| 4.96E+02 | 8.96E+00  | CD7 molecule secreted and trai NM_006137                                        | NM_006137                                |
| 1.51E+00 | 5.90E-01  | calcium channel, calcium channel, NM_021098,NM_021098,NM_001005407              | NM_021098,NM_021098,NM_001005407         |
| 1.85E+00 | 8.88E-01  | growth hormone ADP-ribosylhydr NM_024719                                        | NM_024719                                |
| 1.85E+00 | 8.88E-01  | growth hormone ADP-ribosylhydr NM_024719                                        | NM_024719                                |
| 2.81E-03 | -8.48E+00 | leucine rich repe leucine rich repe NM_001143757                                | NM_001143757                             |
| 2.98E-03 | -8.39E+00 | laminin, alpha 4 ret finger proteir NM_001105209, NM_001105209,NM_001105208     | NM_001105209, NM_001105209,NM_001105208  |
| 2.98E-03 | -8.39E+00 | laminin, alpha 4 ret finger proteir NM_001105209, NM_001105209,NM_001105208     | NM_001105209, NM_001105209,NM_001105208  |
| 7.85E-01 | -3.49E-01 | NEDD4 binding p ras homolog gen NM_018177                                       | NM_018177                                |
| 1.52E+00 | 6.05E-01  | ubiquitin-like wit ubiquitin-like wit NM_013282                                 | NM_013282                                |
| 4.88E-03 | -7.68E+00 | POU class 5 hom psoriasis suscept NM_002701,NM_002701,NM_203289                 | NM_002701,NM_002701,NM_203289            |

|          |           |                   |                    |               |                             |
|----------|-----------|-------------------|--------------------|---------------|-----------------------------|
| 1.58E+00 | 6.58E-01  | olfactory receptc | olfactory receptc  | NM_001004695  | NM_001004695                |
| 1.69E+00 | 7.55E-01  | similar to cDNA s | similar to cDNA s  | NM_001013729  | NM_001013729                |
| 1.50E+00 | 5.89E-01  | ADAM metallope    | non-protein codi   | NR_002224     | NR_002224                   |
| 1.50E+00 | 5.89E-01  | ADAM metallope    | non-protein codi   | NR_002224     | NR_002224                   |
| 2.90E+02 | 8.18E+00  | THAP domain co    | THAP domain co     | NM_015963     | NM_015963                   |
| 4.08E-03 | -7.94E+00 | SIX homeobox 3    | SIX homeobox 3     | NM_005413     | NM_005413                   |
| 4.35E-03 | -7.84E+00 | coiled-coil doma  | methyl-CpG bind    | NM_145020     | NM_145020                   |
| 4.35E-03 | -7.84E+00 | coiled-coil doma  | methyl-CpG bind    | NM_145020     | NM_145020                   |
| 1.43E+00 | 5.11E-01  | G protein-couple  | jagged 2           | NM_013345     | NM_013345                   |
| 4.19E-03 | -7.90E+00 | transmembrane     | interleukin 10 rei | NM_001077263  | NM_001077263                |
| 4.19E-03 | -7.90E+00 | transmembrane     | interleukin 10 rei | NM_001077263  | NM_001077263                |
| 5.08E+02 | 8.99E+00  | WD repeat domæ    | WD repeat domæ     | NM_182552     | NM_182552                   |
| 4.06E-03 | -7.94E+00 | laminin, alpha 1  | leucine rich repe  | NM_005559     | NM_005559                   |
| 4.06E-03 | -7.94E+00 | laminin, alpha 1  | leucine rich repe  | NM_005559     | NM_005559                   |
| 3.01E-03 | -8.38E+00 | hexokinase 3 (w/  | hexokinase 3 (w/   | NM_002115     | NM_002115                   |
| 3.62E-03 | -8.11E+00 | mitogen-activate  | peroxisomal biog   | NM_005923     | NM_005923                   |
| 1.72E+00 | 7.79E-01  | hexose-6-phosph   | hexose-6-phosph    | NM_004285     | NM_004285                   |
| 1.72E+00 | 7.79E-01  | hexose-6-phosph   | hexose-6-phosph    | NM_004285     | NM_004285                   |
| 1.72E+00 | 7.79E-01  | hexose-6-phosph   | hexose-6-phosph    | NM_004285     | NM_004285                   |
| 1.66E+00 | 7.27E-01  | KIAA0182          | KIAA0182           | NM_014615     | NM_014615                   |
| 1.66E+00 | 7.27E-01  | KIAA0182          | KIAA0182           | NM_014615     | NM_014615                   |
| 2.99E+02 | 8.22E+00  | core-binding fact | acyl-CoA synthet   | NM_175931,NM  | NM_175931,NM_005187         |
| 3.16E+02 | 8.30E+00  | nuclear factor of | CTD (carboxy-ter   | NM_172387,NM  | NM_172387,NM_172389         |
| 3.31E-03 | -8.24E+00 | protocadherin gæ  | protocadherin gæ   | NM_018915,NM  | NM_018915,NM_032009         |
| 3.31E-03 | -8.24E+00 | protocadherin gæ  | protocadherin gæ   | NM_018916,NM  | NM_018916,NM_032011         |
| 3.11E+02 | 8.28E+00  | hypothetical LOC  | fibrosin-like 1    | NR_024563     | NR_024563                   |
| 2.30E+02 | 7.84E+00  | keratin 9         | keratin 9          | NM_000226     | NM_000226                   |
| 4.21E+02 | 8.72E+00  | complement con    | complement con     | NM_001008223  | NM_001008223                |
| 2.46E+02 | 7.94E+00  | claudin 19        | claudin 19         | NM_001123395, | NM_001123395,NM_148960      |
| 2.25E+02 | 7.81E+00  | ribosomal protei  | ribosomal protei   | NM_003942,NM  | NM_003942,NM_001006944      |
| 1.38E+00 | 4.60E-01  | POM121 membr      | gamma-glutamyl     | NR_024591     | NR_024591                   |
| 4.30E+02 | 8.75E+00  | SH3 domain and    | HtrA serine pepti  | NM_018986     | NM_018986                   |
| 1.27E+00 | 3.46E-01  | family with sequ  | family with sequ   | NM_201400,NM  | NM_201400,NM_201598         |
| 1.27E+00 | 3.46E-01  | family with sequ  | family with sequ   | NM_201400,NM  | NM_201400,NM_201598         |
| 1.30E+00 | 3.79E-01  | NAD(P)H dehydr    | NIN1/RPN12 bin     | NM_001025434, | NM_001025434,NM_001025433,N |
| 1.30E+00 | 3.79E-01  | NIN1/RPN12 bin    | NIN1/RPN12 bin     | NM_014062     | NM_014062                   |
| 1.30E+00 | 3.79E-01  | NIN1/RPN12 bin    | NIN1/RPN12 bin     | NM_014062     | NM_014062                   |
| 1.42E+00 | 5.02E-01  | cyclin-dependent  | solute carrier fan | NM_033529,NM  | NM_033529,NM_024011         |
| 1.50E+00 | 5.88E-01  | olfactory receptc | olfactory receptc  | NM_001005522  | NM_001005522                |
| 3.34E+02 | 8.38E+00  | arylsulfatase A   | SH3 and multiple   | NM_001085427, | NM_001085427,NM_001085428,N |
| 3.34E+02 | 8.38E+00  | arylsulfatase A   | SH3 and multiple   | NM_001085427, | NM_001085427,NM_001085428,N |
| 4.16E+02 | 8.70E+00  | collagen, type Xv | collagen, type Xv  | NM_030582,NM  | NM_030582,NM_130444         |
| 1.31E+00 | 3.85E-01  | family with sequ  | family with sequ   | NM_182614     | NM_182614                   |
| 1.31E+00 | 3.85E-01  | family with sequ  | family with sequ   | NM_182614     | NM_182614                   |
| 1.52E+00 | 6.00E-01  | chromobox hom     | TBC1 domain fan    | NM_003655     | NM_003655                   |
| 1.52E+00 | 6.00E-01  | chromobox hom     | TBC1 domain fan    | NM_003655     | NM_003655                   |
| 1.30E+00 | 3.74E-01  | iroquois homeob   | iroquois homeob    | NM_016358     | NM_016358                   |
| 1.30E+00 | 3.74E-01  | iroquois homeob   | iroquois homeob    | NM_016358     | NM_016358                   |
| 4.41E+02 | 8.79E+00  | synaptotagmin II  | synaptotagmin II   | NM_032298     | NM_032298                   |
| 1.43E+00 | 5.11E-01  | G protein-couple  | jagged 2           | NM_013345     | NM_013345                   |
| 1.43E+00 | 5.11E-01  | G protein-couple  | jagged 2           | NM_013345     | NM_013345                   |
| 1.36E+00 | 4.43E-01  | signal-regulatory | signal-regulatory  | NM_001040023  | NM_001040023                |
| 1.36E+00 | 4.43E-01  | signal-regulatory | signal-regulatory  | NM_001040023  | NM_001040023                |
| 2.31E+02 | 7.85E+00  | mindbomb homc     | mindbomb homc      | NM_080875     | NM_080875                   |
| 4.13E-03 | -7.92E+00 | cold shock doma   | cold shock doma    | NM_001007553, | NM_001007553,NM_001130523   |
| 4.13E-03 | -7.92E+00 | cold shock doma   | cold shock doma    | NM_001007553, | NM_001007553,NM_001130523   |
| 3.92E+02 | 8.61E+00  | transmembrane     | transmembrane      | NM_024600     | NM_024600                   |
| 3.92E+02 | 8.61E+00  | transmembrane     | transmembrane      | NM_024600     | NM_024600                   |

|          |           |                                                                             |
|----------|-----------|-----------------------------------------------------------------------------|
| 3.30E+02 | 8.36E+00  | core-binding fact core-binding fact NM_175931,NM_175931,NM_005187           |
| 7.25E-01 | -4.63E-01 | twelve-thirteen t twelve-thirteen t NR_024505 NR_024505                     |
| 1.42E+00 | 5.10E-01  | sushi-repeat-con retinitis pigmenti NM_006307 NM_006307                     |
| 1.42E+00 | 5.10E-01  | sushi-repeat-con retinitis pigmenti NM_006307 NM_006307                     |
| 2.37E+02 | 7.89E+00  | activity-regulate activity-regulate NM_015193 NM_015193                     |
| 2.37E+02 | 7.89E+00  | activity-regulate activity-regulate NM_015193 NM_015193                     |
| 2.37E+02 | 7.89E+00  | activity-regulate activity-regulate NM_015193 NM_015193                     |
| 4.38E-03 | -7.83E+00 | CNKSR family me RNA binding mot NM_173515 NM_173515                         |
| 7.76E-01 | -3.66E-01 | GRB2-related ad: GRB2-related ad: NM_006613 NM_006613                       |
| 7.76E-01 | -3.66E-01 | GRB2-related ad: GRB2-related ad: NM_006613 NM_006613                       |
| 1.50E+00 | 5.83E-01  | MCF.2 cell line d: MCF.2 cell line d: NM_024979 NM_024979                   |
| 4.48E-03 | -7.80E+00 | ATP binding dom chromosome 15 NM_001141972 NM_001141972                     |
| 4.48E-03 | -7.80E+00 | ATP binding dom chromosome 15 NM_001141972 NM_001141972                     |
| 2.84E+02 | 8.15E+00  | protein tyrosine non-SMC conder NM_130842,NM_130842,NM_130843,NM_002        |
| 4.66E+02 | 8.86E+00  | lipase maturatio lipase maturatio NM_022773 NM_022773                       |
| 2.50E+02 | 7.97E+00  | cytochrome P45 chromosome 7 o NM_017781 NM_017781                           |
| 1.40E+00 | 4.90E-01  | forkhead box l1 forkhead box l1 NM_144769,NM_144769,NM_012188               |
| 1.40E+00 | 4.90E-01  | forkhead box l1 forkhead box l1 NM_144769,NM_144769,NM_012188               |
| 1.67E+00 | 7.37E-01  | espin pseudogen macrophage stir NR_026567 NR_026567                         |
| 3.60E+02 | 8.49E+00  | meteorin, glial ce meteorin, glial ce NM_001004431 NM_001004431             |
| 1.42E+00 | 5.08E-01  | ciliary rootlet coi neuroblastoma t NR_023386 NR_023386                     |
| 1.42E+00 | 5.08E-01  | ciliary rootlet coi neuroblastoma t NR_023386 NR_023386                     |
| 8.23E-01 | -2.81E-01 | hypothetical LOC potassium chann NR_024492 NR_024492                        |
| 8.23E-01 | -2.81E-01 | hypothetical LOC potassium chann NR_024492 NR_024492                        |
| 1.12E+00 | 1.69E-01  | GNAS complex lc GNAS complex lc NM_001077488 NM_001077488                   |
| 1.12E+00 | 1.69E-01  | GNAS complex lc GNAS complex lc NM_001077488 NM_001077488                   |
| 4.34E+02 | 8.76E+00  | mitochondrial rit zinc finger, DHH NM_024026 NM_024026                      |
| 4.34E+02 | 8.76E+00  | mitochondrial rit zinc finger, DHH NM_024026 NM_024026                      |
| 1.30E+00 | 3.81E-01  | telomerase rever telomerase rever NM_198253,NM_198253,NM_198255             |
| 1.42E+00 | 5.11E-01  | plasmalemma ve plasmalemma ve NM_031310 NM_031310                           |
| 2.65E+02 | 8.05E+00  | potassium voltag secretion regulat NM_004976,NM_004976,NM_001112741         |
| 1.25E+00 | 3.25E-01  | protein tyrosine protein tyrosine NM_015605,NM_015605,NM_001042363,NM_      |
| 1.36E+00 | 4.41E-01  | hypothetical LOC hypothetical LOC NR_026828 NR_026828                       |
| 1.36E+00 | 4.41E-01  | hypothetical LOC hypothetical LOC NR_026828 NR_026828                       |
| 4.11E-03 | -7.93E+00 | electron-transfer ISL LIM homeobc NM_001127716, NM_001127716,NM_000126      |
| 4.40E-03 | -7.83E+00 | Sad1 and UNC84 Sad1 and UNC84 NM_025154,NM_025154,NM_001130965              |
| 4.54E+02 | 8.83E+00  | FAT tumor suppr melatonin recept NM_001008781 NM_001008781                  |
| 1.32E+00 | 4.04E-01  | alkaline phospho alkaline phospho NM_001632 NM_001632                       |
| 3.28E+02 | 8.36E+00  | family with sequi annexin A8 NM_001137556, NM_001137556,NM_001137549,N      |
| 1.31E+00 | 3.88E-01  | RAB11 family int RAB11 family int NM_001142272 NM_001142272                 |
| 1.31E+00 | 3.88E-01  | RAB11 family int RAB11 family int NM_001142272 NM_001142272                 |
| 1.31E+00 | 3.88E-01  | RAB11 family int RAB11 family int NM_001142272 NM_001142272                 |
| 1.27E+00 | 3.42E-01  | spectrin, beta, nc spectrin, beta, nc NM_006946 NM_006946                   |
| 1.27E+00 | 3.42E-01  | spectrin, beta, nc spectrin, beta, nc NM_006946 NM_006946                   |
| 1.27E+00 | 3.42E-01  | spectrin, beta, nc spectrin, beta, nc NM_006946 NM_006946                   |
| 1.78E+00 | 8.29E-01  | glyoxylate reduct glyoxylate reduct NM_032569 NM_032569                     |
| 1.48E+00 | 5.62E-01  | non-protein codi non-protein codi NR_027457 NR_027457                       |
| 1.28E+00 | 3.54E-01  | rhomboid 5 hom rhomboid 5 hom NM_022450 NM_022450                           |
| 1.28E+00 | 3.54E-01  | rhomboid 5 hom rhomboid 5 hom NM_022450 NM_022450                           |
| 1.28E+00 | 3.54E-01  | rhomboid 5 hom rhomboid 5 hom NM_022450 NM_022450                           |
| 1.57E+00 | 6.49E-01  | kinesin family m kinesin family m NM_020816,NM_020816,NM_001122819          |
| 4.05E-03 | -7.95E+00 | tetratricopeptide tetratricopeptide NM_031421 NM_031421                     |
| 4.05E-03 | -7.95E+00 | tetratricopeptide tetratricopeptide NM_031421 NM_031421                     |
| 1.44E+00 | 5.27E-01  | ubiquitin-like wit ubiquitin-like wit NM_013282 NM_013282                   |
| 1.44E+00 | 5.27E-01  | ubiquitin-like wit ubiquitin-like wit NM_013282 NM_013282                   |
| 3.85E+02 | 8.59E+00  | multiple C2 dom: hypothetical pro NM_001159644 NM_001159644                 |
| 1.32E+00 | 4.02E-01  | proline rich 20C proline rich 20C NM_001130405, NM_001130405,NM_001130404,N |
| 4.05E+02 | 8.66E+00  | patched domain RAB18, member NM_001034842 NM_001034842                      |

|          |           |                    |                    |                                       |                            |
|----------|-----------|--------------------|--------------------|---------------------------------------|----------------------------|
| 4.24E+02 | 8.73E+00  | transient receptc  | transient receptc  | NM_145068                             | NM_145068                  |
| 1.43E+00 | 5.13E-01  | galanin receptor   | sal-like 3 (Droso  | NM_001480                             | NM_001480                  |
| 1.43E+00 | 5.13E-01  | galanin receptor   | sal-like 3 (Droso  | NM_001480                             | NM_001480                  |
| 1.43E+00 | 5.13E-01  | galanin receptor   | sal-like 3 (Droso  | NM_001480                             | NM_001480                  |
| 1.34E+00 | 4.27E-01  | regulator of G-pr  | regulator of G-pr  | NM_002924                             | NM_002924                  |
| 1.49E+00 | 5.71E-01  | neurexin 2         | RAS guanyl relea   | NM_138734,NM                          | NM_138734,NM_015080,NM_138 |
| 6.82E-01 | -5.51E-01 | BTG3 associated    | zinc finger protei | NM_017869,NM                          | NM_017869,NM_079837        |
| 6.82E-01 | -5.51E-01 | BTG3 associated    | zinc finger protei | NM_017869,NM                          | NM_017869,NM_079837        |
| 6.82E-01 | -5.51E-01 | BTG3 associated    | zinc finger protei | NM_017869,NM                          | NM_017869,NM_079837        |
| 6.82E-01 | -5.51E-01 | BTG3 associated    | zinc finger protei | NM_017869,NM                          | NM_017869,NM_079837        |
| 4.70E+02 | 8.88E+00  | POTE ankyrin do    | POTE ankyrin do    | NM_001005356, NM_001005356,NR_027480  |                            |
| 4.70E+02 | 8.88E+00  | POTE ankyrin do    | POTE ankyrin do    | NM_001005356, NM_001005356,NR_027480  |                            |
| 1.32E+00 | 3.95E-01  | ATPase type 13A    | ATPase type 13A    | NM_020410                             | NM_020410                  |
| 1.32E+00 | 3.95E-01  | ATPase type 13A    | ATPase type 13A    | NM_020410                             | NM_020410                  |
| 1.40E+00 | 4.86E-01  | paired related     | hc paired related  | hc                                    | NM_016307                  |
| 1.40E+00 | 4.86E-01  | paired related     | hc paired related  | hc                                    | NM_016307                  |
| 4.43E-03 | -7.82E+00 | septin 9           | septin 9           | NM_006640                             | NM_006640                  |
| 1.48E+00 | 5.69E-01  | protein phosphat   | protein phosphat   | NM_013239,NM                          | NM_013239,NM_199326        |
| 1.48E+00 | 5.69E-01  | protein phosphat   | protein phosphat   | NM_013239,NM                          | NM_013239,NM_199326        |
| 1.57E+00 | 6.47E-01  | hypothetical LOC   | cytidine monoph    | NR_026833                             | NR_026833                  |
| 1.57E+00 | 6.47E-01  | hypothetical LOC   | cytidine monoph    | NR_026833                             | NR_026833                  |
| 4.18E-03 | -7.90E+00 | cytochrome c ox    | cytochrome c ox    | NM_001861                             | NM_001861                  |
| 4.18E-03 | -7.90E+00 | cytochrome c ox    | cytochrome c ox    | NM_001861                             | NM_001861                  |
| 4.51E+02 | 8.82E+00  | cadherin, EGF LA   | cadherin, EGF LA   | NM_014246                             | NM_014246                  |
| 4.51E+02 | 8.82E+00  | cadherin, EGF LA   | cadherin, EGF LA   | NM_014246                             | NM_014246                  |
| 1.82E+00 | 8.62E-01  | THO complex 4      | THO complex 4      | NM_005782                             | NM_005782                  |
| 1.89E+00 | 9.22E-01  | cut-like homeob    | cut-like homeob    | NM_181552                             | NM_181552                  |
| 1.52E+00 | 6.00E-01  | SPEG complex lo    | SPEG complex lo    | NM_005876                             | NM_005876                  |
| 4.53E-03 | -7.78E+00 | alanine-glyoxylat  | collagen, type XX  | NR_027475,NR_027475,NR_027474,NM_0312 |                            |
| 1.38E+00 | 4.62E-01  | synovial sarcom    | synovial sarcom    | NM_198935                             | NM_198935                  |
| 1.38E+00 | 4.62E-01  | synovial sarcom    | synovial sarcom    | NM_198935                             | NM_198935                  |
| 4.24E+02 | 8.73E+00  | family with sequ   | chromosome 3 o     | NM_153690                             | NM_153690                  |
| 4.24E+02 | 8.73E+00  | family with sequ   | chromosome 3 o     | NM_153690                             | NM_153690                  |
| 1.42E+00 | 5.06E-01  | YdjC homolog (b    | :coiled-coil doma  | NM_001017964                          | NM_001017964               |
| 1.42E+00 | 5.06E-01  | YdjC homolog (b    | :coiled-coil doma  | NM_001017964                          | NM_001017964               |
| 8.64E-01 | -2.11E-01 | tetratricopeptid   | tetratricopeptid   | NM_001010854                          | NM_001010854               |
| 8.64E-01 | -2.11E-01 | tetratricopeptid   | tetratricopeptid   | NM_001010854                          | NM_001010854               |
| 3.91E+02 | 8.61E+00  | ATPase, Ca++ tra   | ATPase, Ca++ tra   | NM_001683,NM                          | NM_001683,NM_001001331     |
| 3.91E+02 | 8.61E+00  | ATPase, Ca++ tra   | ATPase, Ca++ tra   | NM_001683,NM                          | NM_001683,NM_001001331     |
| 1.40E+00 | 4.85E-01  | zeta-chain (TCR)   | zeta-chain (TCR)   | NM_001079                             | NM_001079                  |
| 1.71E+00 | 7.73E-01  | protein phosphat   | protein phosphat   | NM_013239,NM                          | NM_013239,NM_199326        |
| 4.59E+02 | 8.84E+00  | acetylserotonin    | ( acetylserotonin  | (                                     | NM_004192                  |
| 4.59E+02 | 8.84E+00  | acetylserotonin    | ( acetylserotonin  | (                                     | NM_004192                  |
| 4.59E+02 | 8.84E+00  | acetylserotonin    | ( acetylserotonin  | (                                     | NM_004192                  |
| 4.59E+02 | 8.84E+00  | acetylserotonin    | ( acetylserotonin  | (                                     | NM_004192                  |
| 4.06E+02 | 8.66E+00  | delta-like 4 (Dros | delta-like 4 (Dros | NM_019074                             | NM_019074                  |
| 4.06E+02 | 8.66E+00  | delta-like 4 (Dros | delta-like 4 (Dros | NM_019074                             | NM_019074                  |
| 2.81E-03 | -8.48E+00 | leucine rich repe  | leucine rich repe  | NM_001143757                          | NM_001143757               |
| 1.90E+00 | 9.24E-01  | ST8 alpha-N-acet   | ST8 alpha-N-acet   | NM_013305                             | NM_013305                  |
| 4.38E+02 | 8.77E+00  | PEG3 antisense F   | MER1 repeat cor    | NR_023847                             | NR_023847                  |
| 4.38E+02 | 8.77E+00  | PEG3 antisense F   | MER1 repeat cor    | NR_023847                             | NR_023847                  |
| 1.68E+00 | 7.46E-01  | exonuclease 3'-5   | exonuclease 3'-5   | NM_017820                             | NM_017820                  |
| 1.68E+00 | 7.46E-01  | exonuclease 3'-5   | exonuclease 3'-5   | NM_017820                             | NM_017820                  |
| 4.30E-03 | -7.86E+00 | zinc finger protei | zinc finger protei | NM_001031721                          | NM_001031721               |
| 3.94E+02 | 8.62E+00  | polymerase (RN     | polymerase (RN     | NM_005035                             | NM_005035                  |
| 3.94E+02 | 8.62E+00  | polymerase (RN     | polymerase (RN     | NM_005035                             | NM_005035                  |
| 1.51E+00 | 5.92E-01  | eukaryotic transl  | eukaryotic transl  | NM_001961                             | NM_001961                  |
| 3.53E-03 | -8.14E+00 | GLIS family zinc   | f transmembrane    | NM_147193                             | NM_147193                  |
| 3.53E-03 | -8.14E+00 | GLIS family zinc   | f transmembrane    | NM_147193                             | NM_147193                  |

|          |           |                                                                         |                                                     |                                                     |
|----------|-----------|-------------------------------------------------------------------------|-----------------------------------------------------|-----------------------------------------------------|
| 1.45E+00 | 5.41E-01  | myosin light chain Werner helicase                                      | NM_001012418                                        | NM_001012418                                        |
| 1.45E+00 | 5.41E-01  | myosin light chain Werner helicase                                      | NM_001012418                                        | NM_001012418                                        |
| 1.65E+00 | 7.26E-01  | FERM domain coiled-coil FERM domain coiled-coil                         | NM_024919,NM_024919,NM_001122841                    | NM_024919,NM_024919,NM_001122841                    |
| 1.65E+00 | 7.26E-01  | FERM domain coiled-coil FERM domain coiled-coil                         | NM_024919,NM_024919,NM_001122841                    | NM_024919,NM_024919,NM_001122841                    |
| 4.34E+02 | 8.76E+00  | nuclear receptor nuclear receptor                                       | NM_006312,NM_006312,NM_001077261                    | NM_006312,NM_006312,NM_001077261                    |
| 1.40E+00 | 4.84E-01  | family with sequence homology to hypothetical FLJ253392                 | NM_203392                                           | NM_203392                                           |
| 1.40E+00 | 4.84E-01  | family with sequence homology to hypothetical FLJ253392                 | NM_203392                                           | NM_203392                                           |
| 1.40E+00 | 4.84E-01  | family with sequence homology to hypothetical FLJ253392                 | NM_203392                                           | NM_203392                                           |
| 1.40E+00 | 4.84E-01  | family with sequence homology to hypothetical FLJ253392                 | NM_203392                                           | NM_203392                                           |
| 1.40E+00 | 4.84E-01  | family with sequence homology to hypothetical FLJ253392                 | NM_203392                                           | NM_203392                                           |
| 1.25E+00 | 3.27E-01  | solute carrier fan solute carrier fan                                   | NM_182632                                           | NM_182632                                           |
| 1.25E+00 | 3.27E-01  | solute carrier fan solute carrier fan                                   | NM_182632                                           | NM_182632                                           |
| 1.56E+00 | 6.37E-01  | ATPase, H <sup>+</sup> /K <sup>+</sup> transporting ring finger protein | NM_001676                                           | NM_001676                                           |
| 1.56E+00 | 6.37E-01  | ATPase, H <sup>+</sup> /K <sup>+</sup> transporting ring finger protein | NM_001676                                           | NM_001676                                           |
| 1.45E+00 | 5.33E-01  | zinc finger protein zinc finger protein                                 | NM_001136509                                        | NM_001136509                                        |
| 1.45E+00 | 5.33E-01  | zinc finger protein zinc finger protein                                 | NM_001136509                                        | NM_001136509                                        |
| 1.33E+00 | 4.06E-01  | DOT1-like, histone H4 acetyltransferase                                 | NM_032482                                           | NM_032482                                           |
| 1.33E+00 | 4.06E-01  | DOT1-like, histone H4 acetyltransferase                                 | NM_032482                                           | NM_032482                                           |
| 1.33E+00 | 4.06E-01  | DOT1-like, histone H4 acetyltransferase                                 | NM_032482                                           | NM_032482                                           |
| 1.42E+00 | 5.09E-01  | small nucleolar RNP purine-rich component                               | NR_003688                                           | NR_003688                                           |
| 1.42E+00 | 5.09E-01  | small nucleolar RNP purine-rich component                               | NR_003688                                           | NR_003688                                           |
| 5.03E+02 | 8.97E+00  | adenosine deaminase adenosine deaminase                                 | NM_018702                                           | NM_018702                                           |
| 5.03E+02 | 8.97E+00  | adenosine deaminase adenosine deaminase                                 | NM_018702                                           | NM_018702                                           |
| 1.11E+00 | 1.50E-01  | hypothetical LOC calcium channel, NR_024341                             | NR_024341                                           | NR_024341                                           |
| 1.20E+00 | 2.62E-01  | lysine (K)-specific lysine (K)-specific                                 | NM_015015                                           | NM_015015                                           |
| 1.20E+00 | 2.62E-01  | lysine (K)-specific lysine (K)-specific                                 | NM_015015                                           | NM_015015                                           |
| 1.80E+00 | 8.46E-01  | talin 2 tropomyosin 1 (alpha)                                           | NM_015059                                           | NM_015059                                           |
| 1.35E+00 | 4.30E-01  | chromosome 16 cadherin 15, type 1                                       | NR_024347                                           | NR_024347                                           |
| 1.35E+00 | 4.30E-01  | chromosome 16 cadherin 15, type 1                                       | NR_024347                                           | NR_024347                                           |
| 4.08E+02 | 8.67E+00  | jumonji domain (jumonji domain)                                         | NM_001005920                                        | NM_001005920                                        |
| 4.03E-03 | -7.95E+00 | lipase maturation lipase maturation                                     | NM_022773                                           | NM_022773                                           |
| 1.26E+00 | 3.36E-01  | transient receptor tyrosine kinase sedoheptulokinase                    | NM_080706,NM_080706,NM_080705,NM_018702             | NM_080706,NM_080706,NM_080705,NM_018702             |
| 1.26E+00 | 3.36E-01  | transient receptor tyrosine kinase sedoheptulokinase                    | NM_080706,NM_080706,NM_080705,NM_018702             | NM_080706,NM_080706,NM_080705,NM_018702             |
| 1.26E+00 | 3.36E-01  | transient receptor tyrosine kinase sedoheptulokinase                    | NM_080706,NM_080706,NM_080705,NM_018702             | NM_080706,NM_080706,NM_080705,NM_018702             |
| 1.26E+00 | 3.36E-01  | transient receptor tyrosine kinase sedoheptulokinase                    | NM_080706,NM_080706,NM_080705,NM_018702             | NM_080706,NM_080706,NM_080705,NM_018702             |
| 1.26E+00 | 3.36E-01  | transient receptor tyrosine kinase sedoheptulokinase                    | NM_080706,NM_080706,NM_080705,NM_018702             | NM_080706,NM_080706,NM_080705,NM_018702             |
| 5.02E-03 | -7.64E+00 | transient receptor tyrosine kinase potassium voltage-gated channel      | NM_007332                                           | NM_007332                                           |
| 1.18E+00 | 2.43E-01  | mediator complex TBC1 domain fan                                        | NM_005121                                           | NM_005121                                           |
| 1.35E+00 | 4.34E-01  | leucine rich repeat leucine-rich repeat                                 | NM_153353                                           | NM_153353                                           |
| 1.54E+00 | 6.27E-01  | Rho GTPase activator Rho GTPase activator                               | NM_021226                                           | NM_021226                                           |
| 1.54E+00 | 6.27E-01  | Rho GTPase activator Rho GTPase activator                               | NM_021226                                           | NM_021226                                           |
| 1.27E+00 | 3.44E-01  | solute carrier fan dipeptidase 3                                        | NM_001145963,NM_001145963,NM_001145964,NM_001145965 | NM_001145963,NM_001145963,NM_001145964,NM_001145965 |
| 3.58E+02 | 8.48E+00  | solute carrier fan ret finger protein                                   | NM_014227                                           | NM_014227                                           |
| 1.43E+00 | 5.16E-01  | netrin 5 fucosyltransferase                                             | NM_145807                                           | NM_145807                                           |
| 1.43E+00 | 5.16E-01  | netrin 5 fucosyltransferase                                             | NM_145807                                           | NM_145807                                           |
| 1.43E+00 | 5.16E-01  | netrin 5 fucosyltransferase                                             | NM_145807                                           | NM_145807                                           |
| 1.43E+00 | 5.16E-01  | netrin 5 fucosyltransferase                                             | NM_145807                                           | NM_145807                                           |
| 4.03E+02 | 8.65E+00  | nucleosome assembly nucleosome assembly                                 | NM_153757                                           | NM_153757                                           |
| 4.03E+02 | 8.65E+00  | nucleosome assembly nucleosome assembly                                 | NM_153757                                           | NM_153757                                           |
| 4.03E+02 | 8.65E+00  | nucleosome assembly nucleosome assembly                                 | NM_153757                                           | NM_153757                                           |
| 1.37E+00 | 4.51E-01  | lipocalin 1 (tear fluid odorant binding protein)                        | NM_002297                                           | NM_002297                                           |
| 1.37E+00 | 4.51E-01  | lipocalin 1 (tear fluid odorant binding protein)                        | NM_002297                                           | NM_002297                                           |
| 4.42E+02 | 8.79E+00  | hypothetical LOC fibrosin-like 1                                        | NR_024563                                           | NR_024563                                           |
| 4.42E+02 | 8.79E+00  | hypothetical LOC fibrosin-like 1                                        | NR_024563                                           | NR_024563                                           |
| 4.47E-03 | -7.81E+00 | CD79b molecule, sodium channel, NR_000626                               | NM_000626,NM_000626,NM_021602,NM_001077261          | NM_000626,NM_000626,NM_021602,NM_001077261          |
| 1.44E+00 | 5.27E-01  | DENN/MADD domain solute carrier fan                                     | NM_014957                                           | NM_014957                                           |
| 1.44E+00 | 5.27E-01  | DENN/MADD domain solute carrier fan                                     | NM_014957                                           | NM_014957                                           |
| 2.53E+02 | 7.98E+00  | perilipin 5 perilipin 5                                                 | NM_001013706                                        | NM_001013706                                        |

|          |           |                                        |                               |                               |
|----------|-----------|----------------------------------------|-------------------------------|-------------------------------|
| 1.57E+00 | 6.52E-01  | BARX homeobox transmembrane            | NM_003658                     | NM_003658                     |
| 1.57E+00 | 6.52E-01  | BARX homeobox transmembrane            | NM_003658                     | NM_003658                     |
| 1.54E+00 | 6.25E-01  | intercellular adhesion molecule 1      | NM_000201                     | NM_000201                     |
| 1.54E+00 | 6.25E-01  | intercellular adhesion molecule 1      | NM_000201                     | NM_000201                     |
| 1.33E+00 | 4.09E-01  | chemokine-like factor 1                | NM_016326,NM_181641,NM_181268 | NM_016326,NM_181641,NM_181268 |
| 1.33E+00 | 4.09E-01  | chemokine-like factor 1                | NM_016326,NM_181641,NM_181268 | NM_016326,NM_181641,NM_181268 |
| 1.86E+00 | 8.98E-01  | pregnancy specific beta-1-glycoprotein | NM_002782                     | NM_002782                     |
| 1.86E+00 | 8.98E-01  | pregnancy specific beta-1-glycoprotein | NM_002782                     | NM_002782                     |
| 6.40E-01 | -6.44E-01 | RWD domain core ubiquitin specific     | NM_016940                     | NM_016940                     |
| 1.40E+00 | 4.89E-01  | nuclear factor of kappa light chain    | NM_172387,NM_172389           | NM_172387,NM_172389           |
| 3.02E-03 | -8.37E+00 | calcium channel, voltage-gated L       | NM_201571,NM_201572           | NM_201571,NM_201572           |
| 1.81E+00 | 8.59E-01  | thyroid peroxidase                     | NM_000547,NM_175719,NM_175715 | NM_000547,NM_175719,NM_175715 |
| 1.81E+00 | 8.59E-01  | thyroid peroxidase                     | NM_000547,NM_175719,NM_175715 | NM_000547,NM_175719,NM_175715 |
| 1.42E+00 | 5.03E-01  | adaptor-related protein 1              | NM_012305                     | NM_012305                     |
| 4.04E+02 | 8.66E+00  | carbohydrate kinase                    | NM_018210                     | NM_018210                     |
| 4.04E+02 | 8.66E+00  | carbohydrate kinase                    | NM_018210                     | NM_018210                     |
| 1.70E+00 | 7.67E-01  | RAS p21 protein                        | NM_007368                     | NM_007368                     |
| 1.70E+00 | 7.67E-01  | RAS p21 protein                        | NM_007368                     | NM_007368                     |
| 1.32E+00 | 3.99E-01  | SHC (Src homology domain 2)            | NM_012435                     | NM_012435                     |
| 1.32E+00 | 3.99E-01  | SHC (Src homology domain 2)            | NM_012435                     | NM_012435                     |
| 1.65E+00 | 7.25E-01  | casein kinase 1, cytosolic             | NM_139062,NM_001893           | NM_139062,NM_001893           |
| 1.65E+00 | 7.25E-01  | casein kinase 1, cytosolic             | NM_139062,NM_001893           | NM_139062,NM_001893           |
| 1.65E+00 | 7.25E-01  | casein kinase 1, cytosolic             | NM_139062,NM_001893           | NM_139062,NM_001893           |
| 1.25E+00 | 3.27E-01  | rabphilin 3A-like                      | NM_006987                     | NM_006987                     |
| 1.25E+00 | 3.27E-01  | rabphilin 3A-like                      | NM_006987                     | NM_006987                     |
| 1.68E+00 | 7.48E-01  | melanoma associated protein 1          | NR_024247                     | NR_024247                     |
| 1.68E+00 | 7.48E-01  | melanoma associated protein 1          | NR_024247                     | NR_024247                     |
| 4.37E+02 | 8.77E+00  | SPARC related matrix thrombospondin    | NM_022138                     | NM_022138                     |
| 4.37E+02 | 8.77E+00  | SPARC related matrix thrombospondin    | NM_022138                     | NM_022138                     |
| 3.59E+02 | 8.49E+00  | family with sequence similarity 182    | NM_198491                     | NM_198491                     |
| 1.72E+00 | 7.84E-01  | NADH dehydrogenase (ubiquinone)        | NM_004548                     | NM_004548                     |
| 1.72E+00 | 7.84E-01  | small nucleolar ribonucleoprotein      | NR_002327                     | NR_002327                     |
| 1.87E+00 | 9.06E-01  | zinc finger protein, type 2            | NM_001007248                  | NM_001007248                  |
| 1.87E+00 | 9.06E-01  | zinc finger protein, type 2            | NM_001007248                  | NM_001007248                  |
| 1.88E+00 | 9.14E-01  | zinc finger protein, type 2            | NM_173480                     | NM_173480                     |
| 1.88E+00 | 9.14E-01  | zinc finger protein, type 2            | NM_173480                     | NM_173480                     |
| 1.32E+00 | 4.00E-01  | ATPase family, A class, member 1       | NM_031921                     | NM_031921                     |
| 1.32E+00 | 4.00E-01  | ATPase family, A class, member 1       | NM_031921                     | NM_031921                     |
| 1.36E+00 | 4.46E-01  | hypothetical LOC                       | null                          | null                          |
| 3.95E+02 | 8.63E+00  | plexin B2                              | NM_012401                     | NM_012401                     |
| 4.61E-03 | -7.76E+00 | Kruppel-like factor 1                  | NM_001300                     | NM_001300                     |
| 3.72E+02 | 8.54E+00  | collagen, type IV, alpha 1             | NM_001846                     | NM_001846                     |
| 1.72E+00 | 7.85E-01  | hypothetical protein                   | NR_002787                     | NR_002787                     |
| 1.72E+00 | 7.85E-01  | hypothetical protein                   | NR_002787                     | NR_002787                     |
| 4.17E+02 | 8.70E+00  | fibronectin type 1                     | NM_032532                     | NM_032532                     |
| 4.17E+02 | 8.70E+00  | fibronectin type 1                     | NM_032532                     | NM_032532                     |
| 3.61E+02 | 8.50E+00  | hypothetical LOC                       | null                          | null                          |
| 1.63E+00 | 7.06E-01  | glutamate-rich 1 discs, large          | NM_207332                     | NM_207332                     |
| 3.61E+02 | 8.50E+00  | deleted in azoospermia 1               | NM_001351                     | NM_001351                     |
| 1.37E+00 | 4.56E-01  | copine VII                             | NM_014427,NM_153636           | NM_014427,NM_153636           |
| 1.59E+00 | 6.66E-01  | purinergic receptor P2Y12              | NM_002558                     | NM_002558                     |
| 3.28E-03 | -8.25E+00 | GNAS complex locus TH1-like            | NM_001077488                  | NM_001077488                  |
| 1.76E+00 | 8.12E-01  | phosphatidylinositol 3-kinase          | NM_001127178,NM_017733        | NM_001127178,NM_017733        |
| 3.83E+02 | 8.58E+00  | cell division cycle 5                  | NM_004359                     | NM_004359                     |
| 3.83E+02 | 8.58E+00  | granzyme M (lymphocyte)                | NM_005317                     | NM_005317                     |
| 1.36E+00 | 4.46E-01  | smoothelin-like 2                      | NM_001114974                  | NM_001114974                  |
| 3.75E+02 | 8.55E+00  | nuclear factor of kappa light chain    | NM_001001716,NM_002503        | NM_001001716,NM_002503        |
| 3.75E+02 | 8.55E+00  | nuclear factor of kappa light chain    | NM_001001716,NM_002503        | NM_001001716,NM_002503        |

|          |           |                         |                         |                      |                            |
|----------|-----------|-------------------------|-------------------------|----------------------|----------------------------|
| 3.56E+02 | 8.48E+00  | H19, imprinted n        | H19, imprinted n        | NR_002196            | NR_002196                  |
| 3.52E+02 | 8.46E+00  | chromosome 12           | chromosome 12           | NM_152638            | NM_152638                  |
| 1.37E+00 | 4.51E-01  | growth arrest-sp        | growth arrest-sp        | NM_001143945         | NM_001143945               |
| 1.37E+00 | 4.51E-01  | growth arrest-sp        | growth arrest-sp        | NM_001143945         | NM_001143945               |
| 1.37E+00 | 4.51E-01  | growth arrest-sp        | growth arrest-sp        | NM_001143945         | NM_001143945               |
| 1.37E+00 | 4.51E-01  | growth arrest-sp        | growth arrest-sp        | NM_001143945         | NM_001143945               |
| 1.37E+00 | 4.51E-01  | growth arrest-sp        | growth arrest-sp        | NM_001143945         | NM_001143945               |
| 1.55E+00 | 6.32E-01  | hypothetical LOC        | fibrosin-like 1         | NR_024563            | NR_024563                  |
| 1.55E+00 | 6.32E-01  | hypothetical LOC        | fibrosin-like 1         | NR_024563            | NR_024563                  |
| 1.78E+00 | 8.36E-01  | cadherin, EGF LA        | cadherin, EGF LA        | NM_014246            | NM_014246                  |
| 1.25E+00 | 3.18E-01  | solute carrier fan      | solute carrier fan      | NM_001099646,        | NM_001099646,NM_152908     |
| 1.17E+00 | 2.26E-01  | S-antigen               | diacylglycerol kir      | NM_000541            | NM_000541                  |
| 1.17E+00 | 2.26E-01  | S-antigen               | diacylglycerol kir      | NM_000541            | NM_000541                  |
| 1.17E+00 | 2.26E-01  | S-antigen               | diacylglycerol kir      | NM_000541            | NM_000541                  |
| 1.17E+00 | 2.26E-01  | S-antigen               | diacylglycerol kir      | NM_000541            | NM_000541                  |
| 1.50E+00 | 5.87E-01  | protein tyrosine        | protein tyrosine        | NM_005401            | NM_005401                  |
| 1.50E+00 | 5.87E-01  | protein tyrosine        | protein tyrosine        | NM_005401            | NM_005401                  |
| 1.25E+00 | 3.21E-01  | claudin 5               | hypothetical LOC        | NM_001130861,        | NM_001130861,NM_003277     |
| 1.25E+00 | 3.21E-01  | hypothetical LOC        | hypothetical LOC        | NR_024381            | NR_024381                  |
| 1.61E+00 | 6.87E-01  | SET domain cont         | SET domain cont         | NM_015048            | NM_015048                  |
| 4.50E+02 | 8.82E+00  | paired-like home        | paired-like home        | NM_153426,NM_153426, | NM_153426,NM_153427,NM_00C |
| 4.26E+02 | 8.73E+00  | cadherin, EGF LA        | cadherin, EGF LA        | NM_014246            | NM_014246                  |
| 1.82E+00 | 8.61E-01  | telomerase rever        | telomerase rever        | NM_198253,NM_198253, | NM_198253,NM_198255        |
| 3.91E+02 | 8.61E+00  | chromosome 19           | polypyrimidine tr       | NM_173481            | NM_173481                  |
| 4.42E+02 | 8.79E+00  | heparan sulfate $\zeta$ | heparan sulfate $\zeta$ | NM_005529            | NM_005529                  |
| 1.29E+00 | 3.65E-01  | pitrilysin metallo      | Kruppel-like facti      | NM_014889            | NM_014889                  |
| 1.29E+00 | 3.65E-01  | pitrilysin metallo      | Kruppel-like facti      | NM_014889            | NM_014889                  |
| 1.70E+00 | 7.67E-01  | cat eye syndrom         | cat eye syndrom         | NR_015352            | NR_015352                  |
| 4.79E+02 | 8.90E+00  | peroxisomal prol        | glucocorticoid m        | NM_001037335,        | NM_001037335,NM_033405     |
| 4.79E+02 | 8.90E+00  | peroxisomal prol        | glucocorticoid m        | NM_001037335,        | NM_001037335,NM_033405     |
| 1.31E+00 | 3.90E-01  | malonyl-CoA dec         | oxidative stress i      | NM_012213            | NM_012213                  |
| 4.08E+02 | 8.67E+00  | BTG3 associated         | BTG3 associated         | NM_017869,NM_017869, | NM_017869,NM_079837        |
| 4.55E+02 | 8.83E+00  | protein tyrosine        | protein tyrosine        | NM_130842,NM_130842, | NM_130842,NM_130843,NM_002 |
| 4.55E+02 | 8.83E+00  | protein tyrosine        | protein tyrosine        | NM_130842,NM_130842, | NM_130842,NM_130843,NM_002 |
| 3.83E+02 | 8.58E+00  | junctophilin 3          | junctophilin 3          | NM_020655            | NM_020655                  |
| 3.83E+02 | 8.58E+00  | junctophilin 3          | junctophilin 3          | NM_020655            | NM_020655                  |
| 3.82E+02 | 8.58E+00  | chromosome X o          | chromosome X o          | NM_001145140,        | NM_001145140,NM_001145139  |
| 3.82E+02 | 8.58E+00  | chromosome X o          | chromosome X o          | NM_001145140,        | NM_001145140,NM_001145139  |
| 3.92E+02 | 8.62E+00  | family with sequ        | family with sequ        | NM_001136233         | NM_001136233               |
| 1.39E+00 | 4.74E-01  | cancer/testis ant       | cancer/testis ant       | NM_001017436,        | NM_001017436,NM_152582     |
| 1.39E+00 | 4.74E-01  | cancer/testis ant       | cancer/testis ant       | NM_001017436,        | NM_001017436,NM_152582     |
| 1.39E+00 | 4.74E-01  | cancer/testis ant       | cancer/testis ant       | NM_001017435         | NM_001017435               |
| 3.50E+02 | 8.45E+00  | proprotein conv         | proprotein conv         | NM_017573            | NM_017573                  |
| 3.50E+02 | 8.45E+00  | proprotein conv         | proprotein conv         | NM_017573            | NM_017573                  |
| 3.95E-03 | -7.98E+00 | exonuclease 3'-5        | UDP-N-acetyl-alf        | NM_018199            | NM_018199                  |
| 3.95E-03 | -7.98E+00 | exonuclease 3'-5        | UDP-N-acetyl-alf        | NM_018199            | NM_018199                  |
| 1.23E+00 | 2.93E-01  | retina and anteri       | retina and anteri       | NM_013435            | NM_013435                  |
| 4.28E+02 | 8.74E+00  | neuroblastoma b         | lymphocyte-spec         | NM_001102663         | NM_001102663               |
| 1.29E+00 | 3.70E-01  | chromosome 6 o          | regulating synap        | NR_026807            | NR_026807                  |
| 1.29E+00 | 3.70E-01  | chromosome 6 o          | regulating synap        | NR_026807            | NR_026807                  |
| 4.17E+02 | 8.71E+00  | MAD1 mitotic ar         | MAD1 mitotic ar         | NM_003550,NM_003550, | NM_003550,NM_001013837,NM_ |
| 1.32E+00 | 3.96E-01  | PHD finger prote        | PHD finger prote        | NM_001135862,        | NM_001135862,NM_138415     |
| 1.32E+00 | 3.96E-01  | PHD finger prote        | PHD finger prote        | NM_001135862,        | NM_001135862,NM_138415     |
| 1.45E+00 | 5.40E-01  | family with sequ        | family with sequ        | NM_001010924         | NM_001010924               |
| 1.45E+00 | 5.40E-01  | family with sequ        | family with sequ        | NM_001010924         | NM_001010924               |
| 1.26E+00 | 3.31E-01  | casein kinase 1, c      | casein kinase 1, c      | NM_139062,NM_139062, | NM_139062,NM_001893        |
| 3.87E+02 | 8.60E+00  | TEA domain fami         | TEA domain fami         | NM_003214            | NM_003214                  |
| 3.87E+02 | 8.60E+00  | TEA domain fami         | TEA domain fami         | NM_003214            | NM_003214                  |



|          |          |                                       |                                      |                                      |
|----------|----------|---------------------------------------|--------------------------------------|--------------------------------------|
| 4.31E+02 | 8.75E+00 | anoctamin 1, calanoctamin 1, cal      | NM_018043                            | NM_018043                            |
| 1.23E+00 | 2.99E-01 | neuropeptides B, neuropeptides B,     | NM_005286                            | NM_005286                            |
| 4.04E+02 | 8.66E+00 | protein tyrosine protein tyrosine     | NM_130842,NM_130842,NM_130843,NM_002 | NM_130842,NM_130842,NM_130843,NM_002 |
| 4.04E+02 | 8.66E+00 | protein tyrosine protein tyrosine     | NM_130842,NM_130842,NM_130843,NM_002 | NM_130842,NM_130842,NM_130843,NM_002 |
| 1.64E+00 | 7.15E-01 | tripartite motif-c tripartite motif-c | NM_015271                            | NM_015271                            |
| 1.64E+00 | 7.15E-01 | tripartite motif-c tripartite motif-c | NM_015271                            | NM_015271                            |
| 4.49E+02 | 8.81E+00 | glutamate-rich 1 discs, large (Dros   | NM_207332                            | NM_207332                            |
| 1.48E+00 | 5.63E-01 | POU class 6 hom DAZ associated p      | NM_002702,NR_002702,NR_026893        | NM_002702,NR_002702,NR_026893        |
| 1.48E+00 | 5.63E-01 | POU class 6 hom DAZ associated p      | NM_002702,NR_002702,NR_026893        | NM_002702,NR_002702,NR_026893        |
| 1.84E+00 | 8.82E-01 | nuclear factor (e) nuclear factor (e) | NM_003204                            | NM_003204                            |
| 3.55E+02 | 8.47E+00 | 5'-nucleotidase, 5'-nucleotidase, i   | NM_033253,NM_033253,NM_001002006     | NM_033253,NM_033253,NM_001002006     |
| 3.55E+02 | 8.47E+00 | 5'-nucleotidase, 5'-nucleotidase, i   | NM_033253,NM_033253,NM_001002006     | NM_033253,NM_033253,NM_001002006     |
| 4.10E+02 | 8.68E+00 | UDP-N-acetyl-alc hypothetical LOC     | NM_021808,NM_021808,NM_001122636     | NM_021808,NM_021808,NM_001122636     |
| 1.13E+00 | 1.78E-01 | ankyrin repeat d; POTE ankyrin do     | NR_026916                            | NR_026916                            |
| 1.13E+00 | 1.78E-01 | ankyrin repeat d; POTE ankyrin do     | NR_026916                            | NR_026916                            |
| 1.13E+00 | 1.78E-01 | ankyrin repeat d; POTE ankyrin do     | NR_026916                            | NR_026916                            |
| 4.15E+02 | 8.70E+00 | receptor-interact receptor-interact   | NM_020639                            | NM_020639                            |
| 4.15E+02 | 8.70E+00 | receptor-interact receptor-interact   | NM_020639                            | NM_020639                            |
| 4.15E+02 | 8.70E+00 | receptor-interact receptor-interact   | NM_020639                            | NM_020639                            |
| 1.51E+00 | 5.92E-01 | glucuronidase, b; family with sequ    | NR_027503                            | NR_027503                            |
| 1.51E+00 | 5.92E-01 | glucuronidase, b; family with sequ    | NR_027503                            | NR_027503                            |
| 1.51E+00 | 5.92E-01 | glucuronidase, b; family with sequ    | NR_027503                            | NR_027503                            |
| 1.62E+00 | 6.95E-01 | tuberous sclerosi tuberous sclerosi   | NM_000548,NM_000548,NM_001077183,NM_ | NM_000548,NM_000548,NM_001077183,NM_ |
| 1.62E+00 | 6.95E-01 | tuberous sclerosi tuberous sclerosi   | NM_000548,NM_000548,NM_001077183,NM_ | NM_000548,NM_000548,NM_001077183,NM_ |
| 2.18E+00 | 1.12E+00 | keratin associate ubiquitin-conjug;   | NM_198699                            | NM_198699                            |
| 4.29E+02 | 8.75E+00 | interleukin 3 rec; solute carrier fan | NM_002183                            | NM_002183                            |
| 4.29E+02 | 8.75E+00 | solute carrier fan solute carrier fan | NM_001636                            | NM_001636                            |
| 3.63E+02 | 8.51E+00 | lipase maturati; SRY (sex determi     | NM_022773                            | NM_022773                            |
| 4.21E+02 | 8.72E+00 | nuclear factor (e) nuclear factor (e) | NM_003204                            | NM_003204                            |
| 2.11E+00 | 1.08E+00 | olfactomedin-like olfactomedin-like   | NM_015441                            | NM_015441                            |
| 2.11E+00 | 1.08E+00 | olfactomedin-like olfactomedin-like   | NM_015441                            | NM_015441                            |
| 4.21E+02 | 8.72E+00 | chromosome 18 chromosome 18           | NM_181481,NM_181481,NM_181482        | NM_181481,NM_181481,NM_181482        |
| 4.21E+02 | 8.72E+00 | chromosome 18 chromosome 18           | NM_181481,NM_181481,NM_181482        | NM_181481,NM_181481,NM_181482        |
| 4.21E+02 | 8.72E+00 | chromosome 18 chromosome 18           | NM_181481,NM_181481,NM_181482        | NM_181481,NM_181481,NM_181482        |
| 4.52E+02 | 8.82E+00 | phytanoyl-CoA 2- phytanoyl-CoA 2      | NM_014759,NM_014759,NM_001099335     | NM_014759,NM_014759,NM_001099335     |
| 4.52E+02 | 8.82E+00 | phytanoyl-CoA 2- phytanoyl-CoA 2      | NM_014759,NM_014759,NM_001099335     | NM_014759,NM_014759,NM_001099335     |
| 1.40E+00 | 4.84E-01 | ATP-binding cass ATP-binding cass     | NM_022436                            | NM_022436                            |
| 1.57E+00 | 6.53E-01 | connector enhan connector enhan       | NR_023345                            | NR_023345                            |
| 1.21E+00 | 2.77E-01 | nuclear receptor nuclear receptor     | NM_003269                            | NM_003269                            |
| 1.21E+00 | 2.77E-01 | nuclear receptor nuclear receptor     | NM_003269                            | NM_003269                            |
| 3.68E+02 | 8.52E+00 | coronin, actin bir coronin, actin bir | NM_020441,NM_020441,NM_001018070     | NM_020441,NM_020441,NM_001018070     |
| 4.13E+02 | 8.69E+00 | low density lipop low density lipop   | NM_000527                            | NM_000527                            |
| 4.13E+02 | 8.69E+00 | low density lipop low density lipop   | NM_000527                            | NM_000527                            |
| 1.60E+00 | 6.74E-01 | family with sequ; KIAA0182            | NM_198491                            | NM_198491                            |
| 3.60E+02 | 8.49E+00 | collagen, type V, collagen, type V,   | NM_000093                            | NM_000093                            |
| 3.60E+02 | 8.49E+00 | collagen, type V, collagen, type V,   | NM_000093                            | NM_000093                            |
| 1.47E+00 | 5.52E-01 | solute carrier fan solute carrier fan | NM_198580                            | NM_198580                            |
| 1.47E+00 | 5.52E-01 | solute carrier fan solute carrier fan | NM_198580                            | NM_198580                            |
| 2.33E+00 | 1.22E+00 | trinucleotide rep trinucleotide rep   | NM_001080495                         | NM_001080495                         |
| 4.47E+02 | 8.80E+00 | hypothetical pro; tumor suppressir    | NR_024468                            | NR_024468                            |
| 4.47E+02 | 8.80E+00 | hypothetical pro; tumor suppressir    | NR_024468                            | NR_024468                            |
| 1.38E+00 | 4.70E-01 | UDP-GlcNAc:bet; meteorin, glial ce    | NM_001009905                         | NM_001009905                         |
| 1.38E+00 | 4.70E-01 | UDP-GlcNAc:bet; meteorin, glial ce    | NM_001009905                         | NM_001009905                         |
| 1.61E+00 | 6.86E-01 | TBC1 domain fan family with sequ      | NM_014346                            | NM_014346                            |
| 1.61E+00 | 6.86E-01 | TBC1 domain fan family with sequ      | NM_014346                            | NM_014346                            |
| 1.44E+00 | 5.27E-01 | signal peptide pe signal peptide pe   | NM_152988,NM_152988,NM_001077238     | NM_152988,NM_152988,NM_001077238     |
| 1.42E+00 | 5.04E-01 | TP53 target 3 ubiquitin-conjug;       | NM_016212                            | NM_016212                            |
| 1.42E+00 | 5.04E-01 | TP53 target 3 ubiquitin-conjug;       | NM_016212                            | NM_016212                            |

|          |           |                    |                      |                 |                            |
|----------|-----------|--------------------|----------------------|-----------------|----------------------------|
| 1.68E+00 | 7.48E-01  | prohibitin 2       | prohibitin 2         | NM_007273,NM    | NM_007273,NM_001144831     |
| 3.50E+02 | 8.45E+00  | MCF.2 cell line d  | MCF.2 cell line d    | NM_024979       | NM_024979                  |
| 3.50E+02 | 8.45E+00  | MCF.2 cell line d  | MCF.2 cell line d    | NM_024979       | NM_024979                  |
| 3.44E+02 | 8.43E+00  | signal sequence    | cancer antigen 1     | NM_003144       | NM_003144                  |
| 3.44E+02 | 8.43E+00  | signal sequence    | cancer antigen 1     | NM_003144       | NM_003144                  |
| 1.33E+00 | 4.10E-01  | odorant binding    | progestagen-ass      | NM_014582       | NM_014582                  |
| 1.33E+00 | 4.10E-01  | progestagen-ass    | progestagen-ass      | NM_001018049,NM | NM_001018049,NM_002571     |
| 1.43E+00 | 5.19E-01  | potassium chann    | potassium chann      | NM_018992       | NM_018992                  |
| 1.43E+00 | 5.19E-01  | potassium chann    | potassium chann      | NM_018992       | NM_018992                  |
| 2.62E-03 | -8.58E+00 | eukaryotic transl  | ribose 5-phosph      | NM_004836       | NM_004836                  |
| 1.75E+00 | 8.07E-01  | BTG3 associated    | zinc finger protei   | NM_017869,NM    | NM_017869,NM_079837        |
| 1.75E+00 | 8.07E-01  | BTG3 associated    | zinc finger protei   | NM_017869,NM    | NM_017869,NM_079837        |
| 3.70E+02 | 8.53E+00  | DNA (cytosine-5-   | DNA (cytosine-5-     | NM_013369,NM    | NM_013369,NM_175867        |
| 3.83E+02 | 8.58E+00  | cadherin 4, type   | cadherin 4, type     | NM_001794       | NM_001794                  |
| 3.83E+02 | 8.58E+00  | cadherin 4, type   | cadherin 4, type     | NM_001794       | NM_001794                  |
| 1.35E+00 | 4.34E-01  | ATP-binding cass   | trefoil factor 3 (ii | NM_207174       | NM_207174                  |
| 1.35E+00 | 4.34E-01  | ATP-binding cass   | trefoil factor 3 (ii | NM_207174       | NM_207174                  |
| 4.53E+02 | 8.82E+00  | potassium inwar    | cytohesin 2          | NM_170720       | NM_170720                  |
| 4.53E+02 | 8.82E+00  | potassium inwar    | cytohesin 2          | NM_170720       | NM_170720                  |
| 1.25E+00 | 3.26E-01  | zinc finger protei | zinc finger protei   | NM_006352       | NM_006352                  |
| 1.25E+00 | 3.26E-01  | zinc finger protei | zinc finger protei   | NM_006352       | NM_006352                  |
| 3.90E+02 | 8.61E+00  | major vault prot   | major vault prot     | NM_017458       | NM_017458                  |
| 3.90E+02 | 8.61E+00  | major vault prot   | major vault prot     | NM_017458       | NM_017458                  |
| 1.37E+00 | 4.58E-01  | CTF18, chromosc    | CTF18, chromosc      | NM_022092       | NM_022092                  |
| 1.37E+00 | 4.58E-01  | CTF18, chromosc    | CTF18, chromosc      | NM_022092       | NM_022092                  |
| 1.28E+00 | 3.55E-01  | elongation facto   | elongation facto     | NM_006532       | NM_006532                  |
| 1.28E+00 | 3.55E-01  | elongation facto   | elongation facto     | NM_006532       | NM_006532                  |
| 1.57E+00 | 6.51E-01  | protein phosphat   | protein phosphat     | NM_013239,NM    | NM_013239,NM_199326        |
| 1.57E+00 | 6.51E-01  | protein phosphat   | protein phosphat     | NM_013239,NM    | NM_013239,NM_199326        |
| 1.32E+00 | 4.04E-01  | fibrinogen gamm    | lecithin retinol ac  | NM_021870       | NM_021870                  |
| 1.44E+00 | 5.24E-01  | cullin 4A          | cullin 4A            | NM_001008895    | NM_001008895               |
| 1.44E+00 | 5.24E-01  | cullin 4A          | cullin 4A            | NM_001008895    | NM_001008895               |
| 4.54E+02 | 8.83E+00  | tetraspanin 4      | tetraspanin 4        | NM_001025237    | NM_001025237               |
| 1.70E+00 | 7.62E-01  | null               | transmembrane        | null            | null                       |
| 1.70E+00 | 7.62E-01  | null               | transmembrane        | null            | null                       |
| 1.73E+00 | 7.87E-01  | iroquois homeob    | hypothetical LOC     | NM_024337       | NM_024337                  |
| 1.73E+00 | 7.87E-01  | iroquois homeob    | hypothetical LOC     | NM_024337       | NM_024337                  |
| 1.20E+00 | 2.59E-01  | SH3-binding dom    | SH3-binding dom      | NM_001101401    | NM_001101401               |
| 3.95E+02 | 8.63E+00  | plexin B2          | plexin B2            | NM_012401       | NM_012401                  |
| 3.95E+02 | 8.63E+00  | plexin B2          | plexin B2            | NM_012401       | NM_012401                  |
| 3.95E+02 | 8.63E+00  | plexin B2          | plexin B2            | NM_012401       | NM_012401                  |
| 1.40E+00 | 4.85E-01  | kinesin family m   | kinesin family m     | NM_004522       | NM_004522                  |
| 1.40E+00 | 4.85E-01  | kinesin family m   | kinesin family m     | NM_004522       | NM_004522                  |
| 3.80E+02 | 8.57E+00  | discs, large (Dros | discs, large (Dros   | NM_014902       | NM_014902                  |
| 1.34E+00 | 4.22E-01  | tuberous sclerosi  | tuberous sclerosi    | NM_000548,NM    | NM_000548,NM_001077183,NM_ |
| 1.34E+00 | 4.22E-01  | tuberous sclerosi  | tuberous sclerosi    | NM_000548,NM    | NM_000548,NM_001077183,NM_ |
| 1.34E+00 | 4.22E-01  | tuberous sclerosi  | tuberous sclerosi    | NM_000548,NM    | NM_000548,NM_001077183,NM_ |
| 3.33E+02 | 8.38E+00  | kelch-like 17 (Drc | kelch-like 17 (Drc   | NM_198317       | NM_198317                  |
| 3.33E+02 | 8.38E+00  | kelch-like 17 (Drc | kelch-like 17 (Drc   | NM_198317       | NM_198317                  |
| 3.33E+02 | 8.38E+00  | kelch-like 17 (Drc | pleckstrin homol     | NM_198317       | NM_198317                  |
| 1.58E+00 | 6.64E-01  | iroquois homeob    | iroquois homeob      | NM_016358       | NM_016358                  |
| 1.58E+00 | 6.64E-01  | iroquois homeob    | iroquois homeob      | NM_016358       | NM_016358                  |
| 1.52E+00 | 6.00E-01  | phosphatidylglyc   | phosphatidylglyc     | NM_024419       | NM_024419                  |
| 1.52E+00 | 6.00E-01  | phosphatidylglyc   | phosphatidylglyc     | NM_024419       | NM_024419                  |
| 3.81E+02 | 8.57E+00  | solute carrier fan | solute carrier fan   | NM_003044       | NM_003044                  |
| 1.48E+00 | 5.69E-01  | patatin-like phos  | patatin-like phos    | NM_152286,NM    | NM_152286,NM_001098537     |
| 1.37E+00 | 4.53E-01  | UDP-N-acetyl-al    | UDP-N-acetyl-al      | NM_004481       | NM_004481                  |
| 1.37E+00 | 4.53E-01  | UDP-N-acetyl-al    | UDP-N-acetyl-al      | NM_004481       | NM_004481                  |

|          |           |                                                                                                   |
|----------|-----------|---------------------------------------------------------------------------------------------------|
| 1.13E+00 | 1.72E-01  | X-ray repair com X-ray repair com NM_001100118, NM_001100118, NM_005432, NM_001100118             |
| 4.67E+02 | 8.87E+00  | ring finger protei ring finger protei NM_020914 NM_020914                                         |
| 1.53E+00 | 6.14E-01  | PML-RARA reguli PML-RARA reguli NM_032152 NM_032152                                               |
| 1.39E+00 | 4.71E-01  | tubulin, alpha 3e tubulin, alpha 3e NM_207312 NM_207312                                           |
| 1.39E+00 | 4.71E-01  | tubulin, alpha 3e tubulin, alpha 3e NM_207312 NM_207312                                           |
| 1.42E+00 | 5.07E-01  | chromosome 4 o protocadherin 1( NM_001099783 NM_001099783                                         |
| 1.42E+00 | 5.07E-01  | chromosome 4 o protocadherin 1( NM_001099783 NM_001099783                                         |
| 3.47E-03 | -8.17E+00 | spermatogenesis chromosome 15 NM_024063 NM_024063                                                 |
| 3.52E+02 | 8.46E+00  | H19, imprinted n H19, imprinted n NR_002196 NR_002196                                             |
| 1.77E+00 | 8.27E-01  | pericentrin pericentrin NM_006031 NM_006031                                                       |
| 3.51E+02 | 8.46E+00  | PDZ domain cont PDZ domain cont NM_024895 NM_024895                                               |
| 3.51E+02 | 8.46E+00  | PDZ domain cont PDZ domain cont NM_024895 NM_024895                                               |
| 1.19E+00 | 2.50E-01  | non-protein codi non-protein codi NR_024367 NR_024367                                             |
| 1.19E+00 | 2.50E-01  | non-protein codi non-protein codi NR_024367 NR_024367                                             |
| 1.56E+00 | 6.46E-01  | protease, serine- protease, serine- NM_214710 NM_214710                                           |
| 1.56E+00 | 6.46E-01  | protease, serine- protease, serine- NM_214710 NM_214710                                           |
| 1.56E+00 | 6.46E-01  | protease, serine- protease, serine- NM_214710 NM_214710                                           |
| 3.39E+02 | 8.41E+00  | ubiquitin specific ubiquitin specific NM_025090 NM_025090                                         |
| 3.39E+02 | 8.41E+00  | ubiquitin specific ubiquitin specific NM_025090 NM_025090                                         |
| 1.59E+00 | 6.69E-01  | psoriasis suscept HLA complex gro NR_026816 NR_026816                                             |
| 3.73E+02 | 8.54E+00  | CUGBP, Elav-like CUGBP, Elav-like NM_001025087, NM_001025087, NM_020180, NM_001025087             |
| 1.70E+00 | 7.64E-01  | BEN domain con BEN domain con NM_001100912 NM_001100912                                           |
| 1.70E+00 | 7.64E-01  | BEN domain con BEN domain con NM_001100912 NM_001100912                                           |
| 1.70E+00 | 7.64E-01  | BEN domain con BEN domain con NM_001100912 NM_001100912                                           |
| 3.40E+02 | 8.41E+00  | PR domain conta PR domain conta NM_199454, NM_199454, NM_022114 NM_199454, NM_022114              |
| 3.40E+02 | 8.41E+00  | PR domain conta PR domain conta NM_199454, NM_199454, NM_022114 NM_199454, NM_022114              |
| 3.51E+02 | 8.46E+00  | pseudouridylate E1A binding prot NM_001002020, NM_001002020, NM_025215, NM_001002020              |
| 3.85E+02 | 8.59E+00  | guanidinoacetate guanidinoacetate NM_138924 NM_138924                                             |
| 3.85E+02 | 8.59E+00  | guanidinoacetate guanidinoacetate NM_138924 NM_138924                                             |
| 3.30E+02 | 8.37E+00  | protease, serine- paralemmin NM_214710 NM_214710                                                  |
| 3.30E+02 | 8.37E+00  | protease, serine- paralemmin NM_214710 NM_214710                                                  |
| 4.72E+02 | 8.88E+00  | acetylserotonin C acetylserotonin ( NM_004192 NM_004192                                           |
| 4.24E+02 | 8.73E+00  | DIP2 disco-intera DIP2 disco-intera NM_014974 NM_014974                                           |
| 4.24E+02 | 8.73E+00  | DIP2 disco-intera DIP2 disco-intera NM_014974 NM_014974                                           |
| 3.82E+02 | 8.58E+00  | chromosome X o chromosome X o NM_001145140, NM_001145140, NM_001145139 NM_001145140, NM_001145139 |
| 1.49E+00 | 5.73E-01  | outer dense fiber mucosal vascular NM_182577 NM_182577                                            |
| 1.49E+00 | 5.73E-01  | outer dense fiber mucosal vascular NM_182577 NM_182577                                            |
| 4.52E+02 | 8.82E+00  | FERM domain co FERM domain co NM_024919, NM_024919, NM_001122841 NM_024919, NM_001122841          |
| 2.00E+00 | 1.00E+00  | eukaryotic transl eukaryotic transl NM_003755 NM_003755                                           |
| 2.00E+00 | 1.00E+00  | eukaryotic transl eukaryotic transl NM_003755 NM_003755                                           |
| 4.34E+02 | 8.76E+00  | protein tyrosine protein tyrosine NM_130842, NM_130842, NM_130843, NM_00130842, NM_130843         |
| 4.72E+02 | 8.88E+00  | chromosome 10 La ribonucleopro NR_027152, NR_027152, NR_027151 NR_027152, NR_027151               |
| 3.64E+02 | 8.51E+00  | tektin 5 tektin 5 NM_144674 NM_144674                                                             |
| 1.72E+00 | 7.80E-01  | zinc finger protei zinc finger protei NM_001080417 NM_001080417                                   |
| 1.91E+00 | 9.31E-01  | tubulin, alpha 3c tubulin, alpha 3c NM_006001 NM_006001                                           |
| 4.17E+02 | 8.71E+00  | MAD1 mitotic ar MAD1 mitotic ar NM_003550, NM_003550, NM_001013837, NM_003550, NM_001013837       |
| 3.30E+02 | 8.37E+00  | transmembrane EPS8-like 2 NM_001042463, NM_001042463, NM_174940 NM_001042463, NM_174940           |
| 2.01E+00 | 1.01E+00  | DIP2 disco-intera DIP2 disco-intera NM_014974 NM_014974                                           |
| 2.01E+00 | 1.01E+00  | DIP2 disco-intera DIP2 disco-intera NM_014974 NM_014974                                           |
| 3.28E+02 | 8.36E+00  | aarF domain con aarF domain con NM_174922 NM_174922                                               |
| 3.28E+02 | 8.36E+00  | cleavage and pol cleavage and pol NM_013291 NM_013291                                             |
| 3.28E+02 | 8.36E+00  | cleavage and pol cleavage and pol NM_013291 NM_013291                                             |
| 1.50E+00 | 5.85E-01  | mesoderm induc mesoderm induc NM_017550 NM_017550                                                 |
| 1.50E+00 | 5.85E-01  | mesoderm induc mesoderm induc NM_017550 NM_017550                                                 |
| 3.47E-03 | -8.17E+00 | archaelysin famil archaelysin famil NM_001033569, NM_001033569, NM_001033570, NM_001033569        |
| 3.47E-03 | -8.17E+00 | archaelysin famil arylsulfatase G NM_001033569, NM_001033569, NM_001033570, NM_001033569          |
| 1.57E+00 | 6.47E-01  | transmembrane poly(A) binding p NR_026730 NR_026730                                               |
| 3.07E+02 | 8.26E+00  | WD repeat dom WD repeat dom NM_052821 NM_052821                                                   |

|          |           |                                       |                                      |              |
|----------|-----------|---------------------------------------|--------------------------------------|--------------|
| 1.49E+00 | 5.78E-01  | RAS p21 protein cell division cycle   | NM_007368                            | NM_007368    |
| 1.49E+00 | 5.78E-01  | RAS p21 protein cell division cycle   | NM_007368                            | NM_007368    |
| 3.63E+02 | 8.51E+00  | opioid growth fa opioid growth fa     | NM_007346                            | NM_007346    |
| 1.47E+00 | 5.54E-01  | jumonji domain (jumonji domain (      | NM_001005920                         | NM_001005920 |
| 1.45E+00 | 5.39E-01  | protein tyrosine protein tyrosine     | NM_130842,NM_130842,NM_130843,NM_002 |              |
| 1.45E+00 | 5.39E-01  | protein tyrosine protein tyrosine     | NM_130842,NM_130842,NM_130843,NM_002 |              |
| 3.11E-03 | -8.33E+00 | sex comb on mid endothelin 2          | NM_012236                            | NM_012236    |
| 4.07E+02 | 8.67E+00  | CUB and Sushi m CUB and Sushi m       | NM_052896                            | NM_052896    |
| 4.07E+02 | 8.67E+00  | CUB and Sushi m CUB and Sushi m       | NM_052896                            | NM_052896    |
| 3.62E+02 | 8.50E+00  | family with sequ family with sequ     | NM_001002034                         | NM_001002034 |
| 3.86E+02 | 8.59E+00  | solute carrier fan solute carrier fan | NM_001126335,NM_001126335,NM_014270  |              |
| 2.32E+00 | 1.22E+00  | synaptotagmin II synaptotagmin II     | NM_032298                            | NM_032298    |
| 3.39E+02 | 8.41E+00  | growth arrest an guanine nucleoti     | NM_015675                            | NM_015675    |
| 3.39E+02 | 8.41E+00  | guanine nucleoti guanine nucleoti     | NM_052847                            | NM_052847    |
| 3.53E+02 | 8.46E+00  | galactose-3-O-su galactose-3-O-su     | NM_022134                            | NM_022134    |
| 1.57E+00 | 6.55E-01  | hypothetical LOC hypothetical LOC     | NR_015441                            | NR_015441    |
| 1.57E+00 | 6.55E-01  | hypothetical LOC hypothetical LOC     | NR_015441                            | NR_015441    |
| 2.18E+00 | 1.13E+00  | fibronectin type fibronectin type     | NM_032532                            | NM_032532    |
| 4.52E+02 | 8.82E+00  | KIAA1751 KIAA1751                     | NM_001080484                         | NM_001080484 |
| 3.63E+02 | 8.51E+00  | opioid growth fa opioid growth fa     | NM_007346                            | NM_007346    |
| 1.36E+00 | 4.42E-01  | hypothetical LOC hypothetical pro     | NR_024101                            | NR_024101    |
| 3.68E+02 | 8.52E+00  | solute carrier orꝑ solute carrier orꝑ | NM_016354                            | NM_016354    |
| 3.68E+02 | 8.52E+00  | solute carrier orꝑ solute carrier orꝑ | NM_016354                            | NM_016354    |
| 3.51E+02 | 8.46E+00  | protein tyrosine protein tyrosine     | NM_002840,NM_002840,NM_130440        |              |
| 4.65E+02 | 8.86E+00  | RNA pseudouridy RNA pseudouridy       | NM_058192                            | NM_058192    |
| 1.56E+00 | 6.45E-01  | zinc finger protei zinc finger protei | NM_001159279                         | NM_001159279 |
| 1.56E+00 | 6.45E-01  | zinc finger protei zinc finger protei | NM_001159279                         | NM_001159279 |
| 3.38E+02 | 8.40E+00  | chromosome 19 proprotein convꝑ        | NM_152482                            | NM_152482    |
| 3.38E+02 | 8.40E+00  | proprotein convꝑ proprotein convꝑ     | NM_017573                            | NM_017573    |
| 4.17E+02 | 8.70E+00  | glycerophosphoc glycerophosphoc       | NM_024307                            | NM_024307    |
| 3.94E+02 | 8.62E+00  | zinc finger protei zinc finger protei | NM_133444                            | NM_133444    |
| 1.44E+00 | 5.23E-01  | ATPase family, A ATPase family, A     | NM_018188                            | NM_018188    |
| 1.13E+00 | 1.70E-01  | ribosomal protei ubiquitin-conjug     | NM_001021                            | NM_001021    |
| 1.34E+00 | 4.21E-01  | zinc finger protei hect domain and    | NM_003414                            | NM_003414    |
| 1.34E+00 | 4.21E-01  | zinc finger protei hect domain and    | NM_003414                            | NM_003414    |
| 1.34E+00 | 4.21E-01  | zinc finger protei hect domain and    | NM_003414                            | NM_003414    |
| 3.12E+02 | 8.29E+00  | chromosome 6 o chromosome 6 o         | NM_145028                            | NM_145028    |
| 3.40E+02 | 8.41E+00  | fucosyltransferas fucosyltransferas   | NM_004479                            | NM_004479    |
| 3.40E+02 | 8.41E+00  | fucosyltransferas fucosyltransferas   | NM_004479                            | NM_004479    |
| 3.58E+02 | 8.48E+00  | acetylserotonin ( acetylserotonin (   | NM_004192                            | NM_004192    |
| 3.83E+02 | 8.58E+00  | family with sequ family with sequ     | NM_020223                            | NM_020223    |
| 3.83E+02 | 8.58E+00  | family with sequ family with sequ     | NM_020223                            | NM_020223    |
| 3.83E+02 | 8.58E+00  | family with sequ family with sequ     | NM_020223                            | NM_020223    |
| 3.08E-03 | -8.34E+00 | olfactory receptc tubulin, gamma (    | NM_001080841                         | NM_001080841 |
| 3.76E+02 | 8.56E+00  | iroquois homeob iroquois homeob       | NM_005853                            | NM_005853    |
| 3.70E+02 | 8.53E+00  | CAP-GLY domain CAP-GLY domain         | NM_032421,NM_032421,NM_003388        |              |
| 3.67E+02 | 8.52E+00  | hypothetical LOC hypothetical LOC     | NR_015454                            | NR_015454    |
| 1.25E+00 | 3.24E-01  | tetra-peptide reꝑ tetra-peptide reꝑ   | NM_198479                            | NM_198479    |
| 1.25E+00 | 3.24E-01  | tetra-peptide reꝑ cone-rod homeo      | NM_198479                            | NM_198479    |
| 1.34E+00 | 4.22E-01  | deleted in maligr deleted in maligr   | NM_004406,NM_004406,NM_017579,NM_007 |              |
| 1.34E+00 | 4.22E-01  | deleted in maligr deleted in maligr   | NM_004406,NM_004406,NM_017579,NM_007 |              |
| 3.25E-03 | -8.26E+00 | mitogen-activate tetraspanin 33       | NR_002144                            | NR_002144    |
| 3.37E+02 | 8.40E+00  | tumor necrosis fꝑ mitochondrial in    | NM_018647                            | NM_018647    |
| 3.37E+02 | 8.40E+00  | tumor necrosis fꝑ mitochondrial in    | NM_018647                            | NM_018647    |
| 1.64E+00 | 7.18E-01  | zinc finger and S( zinc finger and S( | NM_032805                            | NM_032805    |
| 1.26E+00 | 3.31E-01  | butyrophilin-like olfactory receptc   | NM_152547                            | NM_152547    |
| 1.26E+00 | 3.31E-01  | butyrophilin-like olfactory receptc   | NM_152547                            | NM_152547    |
| 4.08E+02 | 8.67E+00  | dynein, light chai microtubule-assc   | NM_014183                            | NM_014183    |

|          |           |                                         |                                      |                        |
|----------|-----------|-----------------------------------------|--------------------------------------|------------------------|
| 1.55E+00 | 6.34E-01  | cadherin, EGF LA cadherin, EGF LA       | NM_014246                            | NM_014246              |
| 1.55E+00 | 6.34E-01  | cadherin, EGF LA cadherin, EGF LA       | NM_014246                            | NM_014246              |
| 1.62E+00 | 6.94E-01  | mucin 5AC, oligo mucin 5AC, oligo       | NM_017511                            | NM_017511              |
| 1.62E+00 | 6.94E-01  | mucin 5AC, oligo mucin 5AC, oligo       | NM_017511                            | NM_017511              |
| 1.93E+00 | 9.46E-01  | ADAM metallope non-protein codi         | NR_002224                            | NR_002224              |
| 1.38E+00 | 4.63E-01  | small nucleolar R small nucleolar R     | NR_004381                            | NR_004381              |
| 1.39E+00 | 4.77E-01  | WW domain bin WW domain bin             | NM_012478                            | NM_012478              |
| 1.39E+00 | 4.77E-01  | WW domain bin WW domain bin             | NM_012478                            | NM_012478              |
| 1.56E+00 | 6.40E-01  | nicalin homolog nicalin homolog         | NM_020170                            | NM_020170              |
| 1.56E+00 | 6.40E-01  | nicalin homolog nicalin homolog         | NM_020170                            | NM_020170              |
| 1.42E+00 | 5.03E-01  | gamma-glutamyl gamma-glutamyl           | NM_178311,NM                         | NM_178311,NM_178312    |
| 3.56E+02 | 8.48E+00  | G protein-couple zinc finger, AN1-      | NM_001098201                         | NM_001098201           |
| 3.88E+02 | 8.60E+00  | --- zinc finger protei                  | NR_027050                            | NR_027050              |
| 3.77E+02 | 8.56E+00  | BRI3 binding pro: BRI3 binding pro      | NM_080626                            | NM_080626              |
| 3.77E+02 | 8.56E+00  | BRI3 binding pro: BRI3 binding pro      | NM_080626                            | NM_080626              |
| 1.22E+00 | 2.82E-01  | family with sequ family with sequ       | NR_026714                            | NR_026714              |
| 1.22E+00 | 2.82E-01  | family with sequ family with sequ       | NR_026714                            | NR_026714              |
| 1.34E+00 | 4.25E-01  | hornerin hornerin                       | NM_001009931                         | NM_001009931           |
| 1.34E+00 | 4.25E-01  | hornerin hornerin                       | NM_001009931                         | NM_001009931           |
| 3.75E+02 | 8.55E+00  | notch 3 notch 3                         | NM_000435                            | NM_000435              |
| 3.75E+02 | 8.55E+00  | notch 3 notch 3                         | NM_000435                            | NM_000435              |
| 4.10E+02 | 8.68E+00  | microtubule assc microtubule assc       | NM_015241                            | NM_015241              |
| 4.02E+02 | 8.65E+00  | spire homolog 2 spire homolog 2         | NM_032451                            | NM_032451              |
| 1.26E+00 | 3.32E-01  | complement con cytochrome P45           | NM_001002029, NM_001002029,NM_007293 |                        |
| 1.26E+00 | 3.32E-01  | cytochrome P45 cytochrome P45           | NM_001128590, NM_001128590,NM_000500 |                        |
| 3.27E+02 | 8.35E+00  | signal peptide pe signal peptide pe     | NM_152988,NM                         | NM_152988,NM_001077238 |
| 3.27E+02 | 8.35E+00  | signal peptide pe signal peptide pe     | NM_152988,NM                         | NM_152988,NM_001077238 |
| 1.42E+00 | 5.01E-01  | MCF.2 cell line d MCF.2 cell line d     | NM_024979                            | NM_024979              |
| 2.53E-03 | -8.63E+00 | RNA binding mot RNA binding mot         | NM_006047,NM                         | NM_006047,NM_152838    |
| 1.79E+00 | 8.43E-01  | protein phosphai protein phosphai       | NM_013239,NM                         | NM_013239,NM_199326    |
| 1.52E+00 | 6.04E-01  | kazrin kazrin                           | NM_001017999                         | NM_001017999           |
| 1.52E+00 | 6.04E-01  | kazrin kazrin                           | NM_001017999                         | NM_001017999           |
| 3.24E+02 | 8.34E+00  | lymphocyte-spec troponin T type         | NM_001013255                         | NM_001013255           |
| 3.59E+02 | 8.49E+00  | tet oncogene fan bolA homolog 3         | NM_144993                            | NM_144993              |
| 1.57E+00 | 6.50E-01  | kelch-like 21 (Drc kelch-like 21 (Drc   | NM_014851                            | NM_014851              |
| 1.57E+00 | 6.50E-01  | kelch-like 21 (Drc kelch-like 21 (Drc   | NM_014851                            | NM_014851              |
| 2.05E+00 | 1.04E+00  | BR serine/threon BR serine/threon       | NM_003957                            | NM_003957              |
| 1.41E+00 | 5.01E-01  | protein kinase C, protein kinase C,     | NM_002744                            | NM_002744              |
| 1.76E+00 | 8.13E-01  | calsyntenin 1 calsyntenin 1             | NM_001009566, NM_001009566,NM_014944 |                        |
| 1.76E+00 | 8.13E-01  | calsyntenin 1 calsyntenin 1             | NM_001009566, NM_001009566,NM_014944 |                        |
| 4.08E+02 | 8.67E+00  | anterior pharynx carbonic anhydr:       | NM_001145646, NM_001145646,NM_031301 |                        |
| 4.08E+02 | 8.67E+00  | anterior pharynx carbonic anhydr:       | NM_001145646, NM_001145646,NM_031301 |                        |
| 1.45E+00 | 5.31E-01  | SEC16 homolog / SEC16 homolog /         | NM_014866                            | NM_014866              |
| 4.06E+02 | 8.66E+00  | chromosome 19 polypyrimidine ti         | NM_173481                            | NM_173481              |
| 3.47E+02 | 8.44E+00  | golgi to ER traffic golgi to ER traffic | NM_015949                            | NM_015949              |
| 3.47E+02 | 8.44E+00  | golgi to ER traffic golgi to ER traffic | NM_015949                            | NM_015949              |
| 3.22E+02 | 8.33E+00  | tryptase delta 1 tryptase delta 1       | NM_012217                            | NM_012217              |
| 1.63E+00 | 7.07E-01  | phosphodiestera phosphodiestera         | NM_000921                            | NM_000921              |
| 1.63E+00 | 7.07E-01  | phosphodiestera phosphodiestera         | NM_000921                            | NM_000921              |
| 1.63E+00 | 7.07E-01  | phosphodiestera phosphodiestera         | NM_000921                            | NM_000921              |
| 3.58E+02 | 8.48E+00  | ankyrin repeat ar ankyrin repeat ar     | NM_016150                            | NM_016150              |
| 3.60E+02 | 8.49E+00  | SHC (Src homolo SHC (Src homolo         | NM_012435                            | NM_012435              |
| 8.34E-01 | -2.62E-01 | interleukin 28B (i interleukin 28A (    | NM_172139                            | NM_172139              |
| 4.28E+02 | 8.74E+00  | heparan sulfate f heparan sulfate f     | NM_005529                            | NM_005529              |
| 4.28E+02 | 8.74E+00  | heparan sulfate f heparan sulfate f     | NM_005529                            | NM_005529              |
| 3.87E-03 | -8.01E+00 | forkhead box O3 tripartite motif-c      | NR_026718                            | NR_026718              |
| 3.72E+02 | 8.54E+00  | acetylserotonin C acetylserotonin C     | NM_004192                            | NM_004192              |
| 5.00E+02 | 8.97E+00  | hypothetical LOC coxsackie virus a      | NR_026756                            | NR_026756              |

|          |           |                                                 |                                                  |              |
|----------|-----------|-------------------------------------------------|--------------------------------------------------|--------------|
| 3.45E-03 | -8.18E+00 | small nuclear ribonucleoprotein gamma-glutamyl  | NM_004175                                        | NM_004175    |
| 3.58E+02 | 8.48E+00  | purinergic receptor ATPase, Ca++ transmembrane  | NM_002558                                        | NM_002558    |
| 3.05E+02 | 8.25E+00  | zinc finger and B' zinc finger and B'           | NM_001128833, NM_001128833, NM_020899            |              |
| 3.05E+02 | 8.25E+00  | zinc finger and B' zinc finger and B'           | NM_001128833, NM_001128833, NM_020899            |              |
| 4.69E+02 | 8.87E+00  | polycystic kidney xylosyltransferase            | NM_178541                                        | NM_178541    |
| 3.23E+02 | 8.34E+00  | alkB, alkylation repair                         | NM_017621                                        | NM_017621    |
| 1.82E+00 | 8.66E-01  | PDZ domain containing                           | NM_015009                                        | NM_015009    |
| 1.82E+00 | 8.66E-01  | PDZ domain containing                           | NM_015009                                        | NM_015009    |
| 3.52E+02 | 8.46E+00  | cystathionine-beta-cystathionine-beta           | NM_000071                                        | NM_000071    |
| 3.52E+02 | 8.46E+00  | cystathionine-beta-cystathionine-beta           | NM_000071                                        | NM_000071    |
| 3.72E+02 | 8.54E+00  | Y box binding protein                           | NM_015982                                        | NM_015982    |
| 3.72E+02 | 8.54E+00  | Y box binding protein                           | NM_015982                                        | NM_015982    |
| 3.28E+02 | 8.36E+00  | family with sequence similarity to homocysteine | NM_198488                                        | NM_198488    |
| 4.37E+02 | 8.77E+00  | nuclear factor (epsilon)                        | NM_003204                                        | NM_003204    |
| 3.61E+02 | 8.50E+00  | MAD1 mitotic arrest                             | NM_003550, NM_003550, NM_001013837, NM_001013837 |              |
| 3.18E-03 | -8.30E+00 | T-box 2                                         | NM_005994                                        | NM_005994    |
| 3.18E-03 | -8.30E+00 | T-box 2                                         | NM_005994                                        | NM_005994    |
| 2.35E+00 | 1.23E+00  | ring finger protein                             | NM_020914                                        | NM_020914    |
| 1.46E+00 | 5.45E-01  | protein kinase, cAMP dependent                  | NM_002732                                        | NM_002732    |
| 1.46E+00 | 5.45E-01  | protein kinase, cAMP dependent                  | NM_002732                                        | NM_002732    |
| 3.67E+02 | 8.52E+00  | ciliary rootlet coiled-coil                     | NM_014675                                        | NM_014675    |
| 3.67E+02 | 8.52E+00  | ciliary rootlet coiled-coil                     | NM_014675                                        | NM_014675    |
| 4.16E+02 | 8.70E+00  | signal peptide                                  | NM_152988, NM_152988, NM_001077238               |              |
| 3.76E+02 | 8.56E+00  | galactosamine 4-epimerase                       | NM_000512                                        | NM_000512    |
| 3.76E+02 | 8.56E+00  | galactosamine 4-epimerase                       | NM_000512                                        | NM_000512    |
| 3.90E+02 | 8.61E+00  | olfactory receptor                              | NM_001004471                                     | NM_001004471 |
| 3.90E+02 | 8.61E+00  | olfactory receptor                              | NM_001004471                                     | NM_001004471 |
| 3.72E+02 | 8.54E+00  | chromobox homologue                             | NM_003655                                        | NM_003655    |
| 3.40E-03 | -8.20E+00 | zinc finger protein transmembrane               | NM_015069                                        | NM_015069    |
| 3.22E+02 | 8.33E+00  | G protein-coupled                               | NM_001004106, NM_001004106, NM_002082, NM_002082 |              |
| 3.22E+02 | 8.33E+00  | G protein-coupled                               | NM_001004106, NM_001004106, NM_002082, NM_002082 |              |
| 1.90E+00 | 9.27E-01  | ubiquitin specific                              | NM_032172                                        | NM_032172    |
| 1.90E+00 | 9.27E-01  | ubiquitin specific                              | NM_032172                                        | NM_032172    |
| 3.32E-03 | -8.23E+00 | mitogen-activated myocardin                     | NM_003010                                        | NM_003010    |
| 3.90E+02 | 8.61E+00  | polycystic kidney NODAL modulator               | NM_178541                                        | NM_178541    |
| 1.28E+00 | 3.56E-01  | calcium channel, voltage-gated                  | NM_198397, NM_198397, NM_198378, NM_198378       |              |
| 4.28E+02 | 8.74E+00  | hypothetical LOC                                | NR_026052                                        | NR_026052    |
| 4.28E+02 | 8.74E+00  | hypothetical LOC                                | NR_026052                                        | NR_026052    |
| 4.28E+02 | 8.74E+00  | hypothetical LOC                                | NR_026052                                        | NR_026052    |
| 3.67E+02 | 8.52E+00  | zinc finger and B' zinc finger and B'           | NM_003443                                        | NM_003443    |
| 1.31E+00 | 3.93E-01  | lymphocyte-specific                             | NM_001013253                                     | NM_001013253 |
| 1.31E+00 | 3.93E-01  | lymphocyte-specific                             | NM_001013253                                     | NM_001013253 |
| 3.57E+02 | 8.48E+00  | protein phosphatase                             | NM_015316                                        | NM_015316    |
| 4.08E+02 | 8.67E+00  | tectorin alpha                                  | NM_005422                                        | NM_005422    |
| 2.85E+02 | 8.16E+00  | oculocutaneous                                  | NM_000275                                        | NM_000275    |
| 1.72E+00 | 7.84E-01  | forkhead box K1                                 | NM_001037165                                     | NM_001037165 |
| 3.10E+02 | 8.28E+00  | core-binding factor acyl-CoA synthetase         | NM_175931, NM_175931, NM_005187                  |              |
| 3.10E+02 | 8.28E+00  | core-binding factor acyl-CoA synthetase         | NM_175931, NM_175931, NM_005187                  |              |
| 4.04E+02 | 8.66E+00  | tenascin XB                                     | NM_019105, NM_019105, NM_032470                  |              |
| 3.77E+02 | 8.56E+00  | adhesion regulator                              | NM_007002, NM_007002, NM_175573                  |              |
| 3.82E+02 | 8.58E+00  | coronin, actin binding                          | NM_020441, NM_020441, NM_001018070               |              |
| 3.80E+02 | 8.57E+00  | pleckstrin homologue                            | NM_001143821                                     | NM_001143821 |
| 4.10E+02 | 8.68E+00  | aldehyde dehydrogenase                          | NM_170726, NM_170726, NM_003748                  |              |
| 4.10E+02 | 8.68E+00  | aldehyde dehydrogenase                          | NM_170726, NM_170726, NM_003748                  |              |
| 2.16E+00 | 1.11E+00  | hypothetical protein                            | NR_024468                                        | NR_024468    |
| 1.99E+00 | 9.94E-01  | heparan sulfate proteoglycan                    | NM_005529                                        | NM_005529    |
| 1.41E+00 | 4.95E-01  | solute carrier fan                              | NM_003046                                        | NM_003046    |
| 1.41E+00 | 4.95E-01  | solute carrier fan                              | NM_001008539                                     | NM_001008539 |

|          |           |                                                                           |                                               |              |
|----------|-----------|---------------------------------------------------------------------------|-----------------------------------------------|--------------|
| 1.22E+00 | 2.84E-01  | cytochrome c oxidase cytochrome c oxidase                                 | NM_001864                                     | NM_001864    |
| 3.98E+02 | 8.64E+00  | gamma-aminobutyrate gamma-aminobutyrate                                   | NM_000814,NM_000814,NM_021912                 |              |
| 3.98E+02 | 8.64E+00  | gamma-aminobutyrate gamma-aminobutyrate                                   | NM_000814,NM_000814,NM_021912                 |              |
| 3.45E+02 | 8.43E+00  | abhydrolase domain abhydrolase domain                                     | NM_024527                                     | NM_024527    |
| 3.36E+02 | 8.39E+00  | prostate transmembrane prostate transmembrane                             | NM_199171,NM_199171,NM_199170,NM_199170       |              |
| 3.36E+02 | 8.39E+00  | prostate transmembrane prostate transmembrane                             | NM_199171,NM_199171,NM_199170,NM_199170       |              |
| 1.33E+00 | 4.17E-01  | unc-5 homolog A unc-5 homolog A                                           | NM_133369                                     | NM_133369    |
| 1.57E+00 | 6.52E-01  | paraoxonase 1 paraoxonase 1                                               | NM_000446                                     | NM_000446    |
| 1.30E+00 | 3.80E-01  | tyrosine hydroxylase tyrosine hydroxylase                                 | NM_199293,NM_199293,NM_199292,NM_199292       |              |
| 2.95E+02 | 8.21E+00  | goosecoid homeobox domain 1, ribonucleoprotein                            | NM_173849                                     | NM_173849    |
| 4.00E+02 | 8.64E+00  | solute carrier family 1 solute carrier family 1                           | NM_001142600,NM_001142600,NM_052934,NM_052934 |              |
| 1.46E+00 | 5.47E-01  | SMAD family member SMAD family member                                     | NM_005904                                     | NM_005904    |
| 1.46E+00 | 5.47E-01  | SMAD family member SMAD family member                                     | NM_005904                                     | NM_005904    |
| 1.19E+00 | 2.47E-01  | DAZ associated protein DAZ associated protein                             | NM_018959,NM_018959,NM_170711                 |              |
| 1.19E+00 | 2.47E-01  | DAZ associated protein DAZ associated protein                             | NM_018959,NM_018959,NM_170711                 |              |
| 1.19E+00 | 2.47E-01  | DAZ associated protein DAZ associated protein                             | NM_018959,NM_018959,NM_170711                 |              |
| 3.62E+02 | 8.50E+00  | t-complex 10 homolog chromosome 6 open reading frame 10                   | NM_004610                                     | NM_004610    |
| 3.62E+02 | 8.50E+00  | t-complex 10 homolog chromosome 6 open reading frame 10                   | NM_004610                                     | NM_004610    |
| 1.51E+00 | 5.96E-01  | hypothetical protein zinc finger, BED-1 domain                            | NR_026993                                     | NR_026993    |
| 3.67E+02 | 8.52E+00  | dihydrouridine synthase dihydrouridine synthase                           | NM_020175                                     | NM_020175    |
| 1.34E+00 | 4.19E-01  | acetylserotonin synthase acetylserotonin synthase                         | NM_004043                                     | NM_004043    |
| 4.17E+02 | 8.71E+00  | cytochrome P450 transcription factor 1                                    | NR_002570                                     | NR_002570    |
| 1.38E+00 | 4.60E-01  | basic helix-loop-loop highly accelerated domain                           | NM_080606                                     | NM_080606    |
| 1.38E+00 | 4.60E-01  | basic helix-loop-loop highly accelerated domain                           | NM_080606                                     | NM_080606    |
| 2.98E-03 | -8.39E+00 | protocadherin 15 protocadherin 15                                         | NM_020766,NM_020766,NM_001105243              |              |
| 3.92E+02 | 8.61E+00  | tubulin, beta polypeptide tubulin, beta polypeptide                       | NM_020040                                     | NM_020040    |
| 3.92E+02 | 8.61E+00  | tubulin, beta polypeptide tubulin, beta polypeptide                       | NM_020040                                     | NM_020040    |
| 1.57E+00 | 6.49E-01  | testis-specific transcription factor testis-specific transcription factor | NR_003593,NR_003593,NR_001540                 |              |
| 1.57E+00 | 6.49E-01  | testis-specific transcription factor testis-specific transcription factor | NR_003593,NR_003593,NR_001540                 |              |
| 1.47E+00 | 5.54E-01  | G protein-coupled receptor G protein-coupled receptor                     | NM_001098201                                  | NM_001098201 |
| 1.47E+00 | 5.54E-01  | G protein-coupled receptor G protein-coupled receptor                     | NM_001098201                                  | NM_001098201 |
| 1.47E+00 | 5.54E-01  | G protein-coupled receptor G protein-coupled receptor                     | NM_001098201                                  | NM_001098201 |
| 3.39E-03 | -8.20E+00 | sex hormone-binding globulin sex hormone-binding globulin                 | NR_027462                                     | NR_027462    |
| 4.37E+02 | 8.77E+00  | solute carrier family 1 solute carrier family 1                           | NM_001636                                     | NM_001636    |
| 3.06E+02 | 8.26E+00  | ectonucleoside triphosphate ectonucleoside triphosphate                   | NM_001033113,NM_001033113,NM_198585           |              |
| 3.06E+02 | 8.26E+00  | ectonucleoside triphosphate ectonucleoside triphosphate                   | NM_001033113,NM_001033113,NM_198585           |              |
| 1.40E+00 | 4.82E-01  | KIAA1751 KIAA1751                                                         | NM_001080484                                  | NM_001080484 |
| 1.40E+00 | 4.82E-01  | KIAA1751 KIAA1751                                                         | NM_001080484                                  | NM_001080484 |
| 3.98E+02 | 8.64E+00  | paternally expressed paternally expressed                                 | NM_015068,NM_015068,NM_001040152              |              |
| 3.98E+02 | 8.64E+00  | paternally expressed paternally expressed                                 | NM_015068,NM_015068,NM_001040152              |              |
| 3.98E+02 | 8.64E+00  | paternally expressed paternally expressed                                 | NM_015068,NM_015068,NM_001040152              |              |
| 4.45E+02 | 8.80E+00  | WD repeat domain WD repeat domain                                         | NM_018051                                     | NM_018051    |
| 4.45E+02 | 8.80E+00  | WD repeat domain WD repeat domain                                         | NM_018051                                     | NM_018051    |
| 4.29E+02 | 8.74E+00  | SAM pointed domain SAM pointed domain                                     | NM_012391                                     | NM_012391    |
| 3.82E+02 | 8.58E+00  | parvin, gamma parvin, gamma                                               | NM_022141,NR_022141,NR_024426                 |              |
| 3.82E+02 | 8.58E+00  | parvin, gamma parvin, gamma                                               | NM_001137606                                  | NM_001137606 |
| 1.45E+00 | 5.35E-01  | EP300 interacting protein EP300 interacting protein                       | NM_001008394                                  | NM_001008394 |
| 3.04E-03 | -8.36E+00 | cat eye syndrome cat eye syndrome                                         | NM_017424                                     | NM_017424    |
| 3.04E-03 | -8.36E+00 | cat eye syndrome cat eye syndrome                                         | NM_017424                                     | NM_017424    |
| 3.90E+02 | 8.61E+00  | Rho GTPase activating protein laminin, alpha 1                            | NM_030672,NM_030672,NM_001010000              |              |
| 3.90E+02 | 8.61E+00  | Rho GTPase activating protein laminin, alpha 1                            | NM_030672,NM_030672,NM_001010000              |              |
| 1.64E+00 | 7.13E-01  | hypothetical LOC fibrosin-like 1                                          | NR_024563                                     | NR_024563    |
| 1.64E+00 | 7.13E-01  | hypothetical LOC fibrosin-like 1                                          | NR_024563                                     | NR_024563    |
| 3.93E+02 | 8.62E+00  | G protein pathway G protein pathway                                       | NM_004127,NM_004127,NM_212492                 |              |
| 3.39E+02 | 8.40E+00  | tubulin, beta 3 tubulin, beta 3                                           | NM_006086                                     | NM_006086    |
| 3.39E+02 | 8.40E+00  | tubulin, beta 3 tubulin, beta 3                                           | NM_006086                                     | NM_006086    |
| 3.39E+02 | 8.40E+00  | zinc finger protein zinc finger protein                                   | NM_138447                                     | NM_138447    |
| 1.37E+00 | 4.58E-01  | polycystic kidney xylosyltransferase                                      | NM_178541                                     | NM_178541    |

|          |           |                                                                                   |                                                      |                                                      |
|----------|-----------|-----------------------------------------------------------------------------------|------------------------------------------------------|------------------------------------------------------|
| 1.37E+00 | 4.58E-01  | polycystic kidney xylosyltransferas                                               | NM_178541                                            | NM_178541                                            |
| 1.37E+00 | 4.58E-01  | polycystic kidney xylosyltransferas                                               | NM_178541                                            | NM_178541                                            |
| 1.37E+00 | 4.58E-01  | polycystic kidney xylosyltransferas                                               | NM_178541                                            | NM_178541                                            |
| 3.92E+02 | 8.61E+00  | RAS p21 protein cell division cycle                                               | NM_007368                                            | NM_007368                                            |
| 3.92E+02 | 8.61E+00  | RAS p21 protein cell division cycle                                               | NM_007368                                            | NM_007368                                            |
| 2.19E+00 | 1.13E+00  | inositol monophosphate chromosome 8 o                                             | NM_017813                                            | NM_017813                                            |
| 2.19E+00 | 1.13E+00  | inositol monophosphate chromosome 8 o                                             | NM_017813                                            | NM_017813                                            |
| 3.53E+02 | 8.46E+00  | D-2-hydroxyglutamate galactose-3-O-su                                             | NM_152783                                            | NM_152783                                            |
| 3.53E+02 | 8.46E+00  | D-2-hydroxyglutamate galactose-3-O-su                                             | NM_152783                                            | NM_152783                                            |
| 3.53E+02 | 8.46E+00  | D-2-hydroxyglutamate galactose-3-O-su                                             | NM_152783                                            | NM_152783                                            |
| 1.52E+00 | 6.04E-01  | SMAD family member SMAD family member                                             | NM_001145103                                         | NM_001145103                                         |
| 1.55E+00 | 6.32E-01  | peroxisome proliferator-activated receptor gamma                                  | NM_005036,NM_005036,NM_001001928                     | NM_005036,NM_005036,NM_001001928                     |
| 1.55E+00 | 6.32E-01  | peroxisome proliferator-activated receptor gamma                                  | NM_005036,NM_005036,NM_001001928                     | NM_005036,NM_005036,NM_001001928                     |
| 1.32E+00 | 3.95E-01  | melanophilin prolactin releasir                                                   | NM_001042467, NM_001042467,NM_024101                 | NM_001042467, NM_001042467,NM_024101                 |
| 1.32E+00 | 3.95E-01  | melanophilin prolactin releasir                                                   | NM_001042467, NM_001042467,NM_024101                 | NM_001042467, NM_001042467,NM_024101                 |
| 2.96E+02 | 8.21E+00  | peptidase D peptidase D                                                           | NM_000285                                            | NM_000285                                            |
| 3.60E+02 | 8.49E+00  | solute carrier fan ASMTL antisense                                                | NM_001636                                            | NM_001636                                            |
| 3.27E+02 | 8.35E+00  | diacylglycerol kinase diacylglycerol kinase                                       | NM_001105540                                         | NM_001105540                                         |
| 3.90E+02 | 8.61E+00  | ArfGAP with GTP ArfGAP with GTP                                                   | NM_014914,NM_014914,NM_001037131                     | NM_014914,NM_014914,NM_001037131                     |
| 3.90E+02 | 8.61E+00  | ArfGAP with GTP ArfGAP with GTP                                                   | NM_014914,NM_014914,NM_001037131                     | NM_014914,NM_014914,NM_001037131                     |
| 3.68E+02 | 8.52E+00  | troponin T type 3 troponin T type 3                                               | NM_001042781, NM_001042781,NM_001042782,NM_001042782 | NM_001042781, NM_001042781,NM_001042782,NM_001042782 |
| 3.14E+02 | 8.29E+00  | notch 1 notch 1                                                                   | NM_017617                                            | NM_017617                                            |
| 3.14E+02 | 8.29E+00  | notch 1 notch 1                                                                   | NM_017617                                            | NM_017617                                            |
| 3.99E+02 | 8.64E+00  | hypothetical LOC hypothetical LOC                                                 | NR_024488                                            | NR_024488                                            |
| 3.67E+02 | 8.52E+00  | mitogen-activated protein kinase mitogen-activated protein kinase                 | NM_005456                                            | NM_005456                                            |
| 3.67E+02 | 8.52E+00  | mitogen-activated protein kinase mitogen-activated protein kinase                 | NM_005456                                            | NM_005456                                            |
| 4.00E+02 | 8.64E+00  | UV radiation resistant wingless-type MMTV promoter                                | NM_003369                                            | NM_003369                                            |
| 1.30E+00 | 3.73E-01  | hypothetical LOC hypothetical LOC                                                 | NR_027426                                            | NR_027426                                            |
| 1.30E+00 | 3.73E-01  | hypothetical LOC hypothetical LOC                                                 | NR_027426                                            | NR_027426                                            |
| 3.66E-03 | -8.09E+00 | acetylcholinesterase mucin 17, cell surface                                       | NM_015831,NM_015831,NM_000665                        | NM_015831,NM_015831,NM_000665                        |
| 4.28E+02 | 8.74E+00  | connector enhancer connector enhancer                                             | NR_023345                                            | NR_023345                                            |
| 3.57E+02 | 8.48E+00  | growth arrest-specific 6 growth arrest-specific 6                                 | NM_001143946                                         | NM_001143946                                         |
| 3.44E+02 | 8.43E+00  | VENT homeobox VENT homeobox                                                       | NR_001559                                            | NR_001559                                            |
| 2.82E+02 | 8.14E+00  | family with sequence similarity 117 family with sequence similarity 117           | NM_001142864                                         | NM_001142864                                         |
| 4.04E+02 | 8.66E+00  | RAB35, member RAB35, member                                                       | NM_006861                                            | NM_006861                                            |
| 4.04E+02 | 8.66E+00  | RAB35, member RAB35, member                                                       | NM_006861                                            | NM_006861                                            |
| 1.40E+00 | 4.90E-01  | growth hormone releasing hormone receptor                                         | NM_024719                                            | NM_024719                                            |
| 1.40E+00 | 4.90E-01  | growth hormone releasing hormone receptor                                         | NM_024719                                            | NM_024719                                            |
| 3.22E+02 | 8.33E+00  | HGF activator HGF activator                                                       | NM_001528                                            | NM_001528                                            |
| 2.80E-03 | -8.48E+00 | asteroid homologous protein 1 asteroid homologous protein 1                       | NM_014065                                            | NM_014065                                            |
| 4.01E+02 | 8.65E+00  | active B-cell receptor-related protein 1 active B-cell receptor-related protein 1 | NM_001159746                                         | NM_001159746                                         |
| 1.30E+00 | 3.79E-01  | ATPase, class VI, cytoplasmic ATPase, class VI, cytoplasmic                       | NM_032189,NM_032189,NM_015205                        | NM_032189,NM_032189,NM_015205                        |
| 1.30E+00 | 3.79E-01  | ATPase, class VI, cytoplasmic ATPase, class VI, cytoplasmic                       | NM_032189,NM_032189,NM_015205                        | NM_032189,NM_032189,NM_015205                        |
| 3.92E+02 | 8.61E+00  | coagulation factor melatonin receptor                                             | NM_000128                                            | NM_000128                                            |
| 3.92E+02 | 8.61E+00  | coagulation factor melatonin receptor                                             | NM_000128                                            | NM_000128                                            |
| 3.89E+02 | 8.60E+00  | GTP binding protein histamine receptor                                            | NM_015666                                            | NM_015666                                            |
| 3.89E+02 | 8.60E+00  | GTP binding protein histamine receptor                                            | NM_015666                                            | NM_015666                                            |
| 3.71E+02 | 8.54E+00  | cleavage and polyadenylation factor 1 cleavage and polyadenylation factor 1       | NM_013291                                            | NM_013291                                            |
| 3.71E+02 | 8.54E+00  | cleavage and polyadenylation factor 1 cleavage and polyadenylation factor 1       | NM_013291                                            | NM_013291                                            |
| 3.73E+02 | 8.54E+00  | hypothetical LOC hypothetical LOC                                                 | NR_026828                                            | NR_026828                                            |
| 3.28E+02 | 8.36E+00  | solute carrier fan Kruppel-like factor 10                                         | NM_006934,NM_006934,NM_201649,NM_001143946           | NM_006934,NM_006934,NM_201649,NM_001143946           |
| 3.98E+02 | 8.64E+00  | lipid phosphate 4-epoxide hydrolase lipid phosphate 4-epoxide hydrolase           | NM_024888                                            | NM_024888                                            |
| 3.98E+02 | 8.64E+00  | lipid phosphate 4-epoxide hydrolase lipid phosphate 4-epoxide hydrolase           | NM_024888                                            | NM_024888                                            |
| 3.98E+02 | 8.64E+00  | lipid phosphate 4-epoxide hydrolase lipid phosphate 4-epoxide hydrolase           | NM_024888                                            | NM_024888                                            |
| 1.45E+00 | 5.35E-01  | 5'-nucleotidase cytosolic 5'-nucleotidase cytosolic                               | NM_022908,NM_022908,NM_001134231                     | NM_022908,NM_022908,NM_001134231                     |
| 1.45E+00 | 5.35E-01  | 5'-nucleotidase cytosolic 5'-nucleotidase cytosolic                               | NM_022908,NM_022908,NM_001134231                     | NM_022908,NM_022908,NM_001134231                     |
| 2.95E+02 | 8.21E+00  | metastasis associated protein 1 metastasis associated protein 1                   | NM_004689                                            | NM_004689                                            |
| 2.95E+02 | 8.21E+00  | metastasis associated protein 1 metastasis associated protein 1                   | NM_004689                                            | NM_004689                                            |



|          |           |                                           |                                     |                                        |
|----------|-----------|-------------------------------------------|-------------------------------------|----------------------------------------|
| 2.64E+00 | 1.40E+00  | Rho GDP dissociation factor 4             | NM_004309                           | NM_004309                              |
| 4.24E+02 | 8.73E+00  | DIP2 domain 1                             | NM_014974                           | NM_014974                              |
| 1.53E+00 | 6.10E-01  | chromosome 7 open reading frame 10        | NM_001134395                        | NM_001134395,NM_001134396,NM_001134397 |
| 3.56E+02 | 8.48E+00  | fibrosin-like 1                           | NM_001142641                        | NM_001142641                           |
| 3.56E+02 | 8.48E+00  | fibrosin-like 1                           | NM_001142641                        | NM_001142641                           |
| 3.99E+02 | 8.64E+00  | ubiquitin-like protein 1                  | NM_013282                           | NM_013282                              |
| 3.99E+02 | 8.64E+00  | ubiquitin-like protein 1                  | NM_013282                           | NM_013282                              |
| 1.37E+00 | 4.57E-01  | DnaJ (Hsp40) domain 1                     | NM_058246                           | NM_058246                              |
| 1.37E+00 | 4.57E-01  | DnaJ (Hsp40) domain 1                     | NM_058246                           | NM_058246                              |
| 3.29E-03 | -8.25E+00 | TSPY-like 5                               | NM_033512                           | NM_033512                              |
| 3.89E+02 | 8.60E+00  | tripartite motif C                        | NM_138800                           | NM_138800                              |
| 3.89E+02 | 8.60E+00  | tripartite motif C                        | NM_138800                           | NM_138800                              |
| 3.34E+02 | 8.38E+00  | cat eye syndrome 1                        | NM_017829,NM_033070                 | NM_017829,NM_033070                    |
| 3.34E+02 | 8.38E+00  | cat eye syndrome 1                        | NM_017829,NM_033070                 | NM_017829,NM_033070                    |
| 3.82E+02 | 8.58E+00  | ras responsive element sequence 1         | NM_001003698                        | NM_001003698,NM_001003699              |
| 1.29E+00 | 3.70E-01  | chorionic somatomedin 1                   | NM_022644                           | NM_022644                              |
| 1.29E+00 | 3.70E-01  | chorionic somatomedin 1                   | NM_022644                           | NM_022644                              |
| 1.29E+00 | 3.70E-01  | chorionic somatomedin 1                   | NM_022644                           | NM_022644                              |
| 1.92E+00 | 9.44E-01  | programmed cell death 1                   | NR_003713                           | NR_003713                              |
| 1.92E+00 | 9.44E-01  | programmed cell death 1                   | NR_003713                           | NR_003713                              |
| 3.28E+02 | 8.36E+00  | zinc and ring finger protein 1            | NM_032173                           | NM_032173                              |
| 4.66E+02 | 8.86E+00  | EH-domain containing protein 1            | NM_014601                           | NM_014601                              |
| 4.66E+02 | 8.86E+00  | EH-domain containing protein 1            | NM_014601                           | NM_014601                              |
| 4.66E+02 | 8.86E+00  | EH-domain containing protein 1            | NM_014601                           | NM_014601                              |
| 3.98E+02 | 8.64E+00  | dimethylarginine dimethylaminohydrolase 1 | NM_013974                           | NM_013974                              |
| 3.98E+02 | 8.64E+00  | dimethylarginine dimethylaminohydrolase 1 | NM_013974                           | NM_013974                              |
| 2.68E+02 | 8.07E+00  | zinc finger protein 1                     | NM_001127464                        | NM_001127464                           |
| 2.68E+02 | 8.07E+00  | zinc finger protein 1                     | NM_001127464                        | NM_001127464                           |
| 3.26E+02 | 8.35E+00  | solute carrier family 5 member 1          | NM_006598                           | NM_006598                              |
| 1.41E+00 | 5.01E-01  | protein kinase C, delta                   | NM_002744                           | NM_002744                              |
| 1.41E+00 | 5.01E-01  | protein kinase C, delta                   | NM_002744                           | NM_002744                              |
| 3.37E+02 | 8.40E+00  | hypothetical LOC10028341                  | NR_024341                           | NR_024341                              |
| 3.37E+02 | 8.40E+00  | hypothetical LOC10028341                  | NR_024341                           | NR_024341                              |
| 3.37E+02 | 8.40E+00  | hypothetical LOC10028341                  | NR_024341                           | NR_024341                              |
| 3.57E+02 | 8.48E+00  | glycophorin C                             | NM_002101,NM_016815                 | NM_002101,NM_016815                    |
| 3.57E+02 | 8.48E+00  | glycophorin C                             | NM_002101,NM_016815                 | NM_002101,NM_016815                    |
| 3.37E+02 | 8.40E+00  | zinc finger protein 1                     | NM_001002836                        | NM_001002836                           |
| 3.37E+02 | 8.40E+00  | zinc finger protein 1                     | NM_001002836                        | NM_001002836                           |
| 3.68E+02 | 8.52E+00  | coronin, actin binding protein 1          | NM_020441,NM_001018070              | NM_020441,NM_001018070                 |
| 3.68E+02 | 8.52E+00  | coronin, actin binding protein 1          | NM_020441,NM_001018070              | NM_020441,NM_001018070                 |
| 1.55E+00 | 6.37E-01  | Rhox homeobox 1                           | NM_032498                           | NM_032498                              |
| 3.02E+02 | 8.24E+00  | notch 1                                   | NM_017617                           | NM_017617                              |
| 3.65E+02 | 8.51E+00  | chromosome 14 open reading frame 1        | NM_018228                           | NM_018228                              |
| 3.36E+02 | 8.39E+00  | TP53 target 3                             | NM_016212                           | NM_016212                              |
| 3.65E+02 | 8.51E+00  | NFAT activating protein 1                 | NM_145912                           | NM_145912                              |
| 3.19E+02 | 8.32E+00  | ArfGAP with Rho GTPase binding domain 1   | NM_001135190,NM_015242,NM_001135191 | NM_001135190,NM_015242,NM_001135191    |
| 3.19E+02 | 8.32E+00  | ArfGAP with Rho GTPase binding domain 1   | NM_001135190,NM_015242,NM_001135191 | NM_001135190,NM_015242,NM_001135191    |
| 1.14E+00 | 1.90E-01  | exosome component 1                       | NM_019037                           | NM_019037                              |
| 1.14E+00 | 1.90E-01  | exosome component 1                       | NM_019037                           | NM_019037                              |
| 1.27E+00 | 3.45E-01  | X antigen family 1                        | NM_001097603                        | NM_001097603,NM_001097602,NM_001097604 |
| 3.32E+02 | 8.38E+00  | patatin-like phosphatase 1                | NM_152286,NM_001098537              | NM_152286,NM_001098537                 |
| 1.56E+00 | 6.40E-01  | cytochrome P450 2C8                       | NR_002570                           | NR_002570                              |
| 1.56E+00 | 6.40E-01  | cytochrome P450 2C8                       | NR_002570                           | NR_002570                              |
| 3.32E+02 | 8.38E+00  | zinc finger protein 1                     | NR_027050                           | NR_027050                              |
| 3.32E+02 | 8.38E+00  | zinc finger protein 1                     | NR_027050                           | NR_027050                              |
| 3.71E+02 | 8.53E+00  | SET binding factor 1                      | NM_002972                           | NM_002972                              |
| 3.01E+02 | 8.23E+00  | melanoma antigen 1                        | NM_001011544                        | NM_001011544,NM_005366                 |
| 1.53E+00 | 6.12E-01  | zinc finger protein 1                     | NM_152625                           | NM_152625                              |

|          |           |                     |                     |               |                             |
|----------|-----------|---------------------|---------------------|---------------|-----------------------------|
| 1.53E+00 | 6.12E-01  | zinc finger protei  | zinc finger protei  | NM_152625     | NM_152625                   |
| 1.53E+00 | 6.12E-01  | zinc finger protei  | zinc finger protei  | NM_152625     | NM_152625                   |
| 1.46E+00 | 5.51E-01  | chromosome 1 o      | Fc fragment of Ig   | NM_001013625  | NM_001013625                |
| 1.46E+00 | 5.51E-01  | chromosome 1 o      | Fc fragment of Ig   | NM_001013625  | NM_001013625                |
| 3.52E+02 | 8.46E+00  | H19, imprinted n    | H19, imprinted n    | NR_002196     | NR_002196                   |
| 3.54E+02 | 8.47E+00  | lysine (K)-specific | lysine (K)-specific | NM_001080424  | NM_001080424                |
| 2.03E+00 | 1.02E+00  | hypothetical pro    | growth arrest-sp    | NR_024609     | NR_024609                   |
| 2.03E+00 | 1.02E+00  | hypothetical pro    | growth arrest-sp    | NR_024609     | NR_024609                   |
| 3.70E+02 | 8.53E+00  | FERM and PDZ do     | RNA (guanine-9-)    | NM_014907     | NM_014907                   |
| 1.34E+00 | 4.22E-01  | BEN domain con      | BEN domain con      | NR_027512     | NR_027512                   |
| 1.34E+00 | 4.22E-01  | BEN domain con      | BEN domain con      | NR_027512     | NR_027512                   |
| 3.06E+02 | 8.26E+00  | cathepsin D         | cathepsin D         | NM_001909     | NM_001909                   |
| 3.06E+02 | 8.26E+00  | cathepsin D         | cathepsin D         | NM_001909     | NM_001909                   |
| 7.55E-01 | -4.06E-01 | jerky homolog (n    | prostate stem ce    | NM_003724,NM  | NM_003724,NM_001077527      |
| 3.39E+02 | 8.41E+00  | chromosome 16       | chromosome 16       | NM_175900     | NM_175900                   |
| 3.39E+02 | 8.41E+00  | chromosome 16       | chromosome 16       | NM_175900     | NM_175900                   |
| 1.74E+00 | 8.00E-01  | zinc finger protei  | zinc finger protei  | NM_001099638, | NM_001099638,NM_007145,NM_  |
| 1.74E+00 | 8.00E-01  | zinc finger protei  | zinc finger protei  | NM_001099638, | NM_001099638,NM_007145,NM_  |
| 1.35E+00 | 4.32E-01  | similar to HGC6.:   | kinesin family me   | NM_001129895  | NM_001129895                |
| 3.23E+02 | 8.34E+00  | cadherin, EGF LA    | cadherin, EGF LA    | NM_014246     | NM_014246                   |
| 3.23E+02 | 8.34E+00  | cadherin, EGF LA    | cadherin, EGF LA    | NM_014246     | NM_014246                   |
| 3.25E+02 | 8.34E+00  | PQ loop repeat c    | PQ loop repeat c    | NM_001146343, | NM_001146343,NM_001146345,N |
| 3.25E+02 | 8.34E+00  | PQ loop repeat c    | PQ loop repeat c    | NM_001146343, | NM_001146343,NM_001146345,N |
| 3.72E-03 | -8.07E+00 | hypothetical LOC    | fibrosin-like 1     | NR_024563     | NR_024563                   |
| 3.19E+02 | 8.32E+00  | nuclear factor of   | nuclear factor of   | NM_172387,NM  | NM_172387,NM_172389         |
| 3.19E+02 | 8.32E+00  | nuclear factor of   | nuclear factor of   | NM_172387,NM  | NM_172387,NM_172389         |
| 1.58E+00 | 6.64E-01  | testis expressed    | olfactory receptc   | NM_144582     | NM_144582                   |
| 1.58E+00 | 6.64E-01  | olfactory receptc   | olfactory receptc   | NR_002185     | NR_002185                   |
| 1.84E+00 | 8.79E-01  | cadherin, EGF LA    | cadherin, EGF LA    | NM_014246     | NM_014246                   |
| 3.07E+02 | 8.26E+00  | TBC1 domain fan     | TBC1 domain fan     | NM_020705     | NM_020705                   |
| 4.68E+02 | 8.87E+00  | fibroblast growt    | ring finger protei  | NM_021923     | NM_021923                   |
| 1.39E+00 | 4.79E-01  | chromosome 14       | POM121 membr        | NR_027006     | NR_027006                   |
| 3.12E+02 | 8.29E+00  | DEAD (Asp-Glu-A     | DEAD (Asp-Glu-A     | NM_175066     | NM_175066                   |
| 3.12E+02 | 8.29E+00  | DEAD (Asp-Glu-A     | DEAD (Asp-Glu-A     | NM_175066     | NM_175066                   |
| 3.12E+02 | 8.29E+00  | DEAD (Asp-Glu-A     | DEAD (Asp-Glu-A     | NM_175066     | NM_175066                   |
| 1.29E+00 | 3.66E-01  | t-SNARE domain      | t-SNARE domain      | NM_145003     | NM_145003                   |
| 1.29E+00 | 3.66E-01  | t-SNARE domain      | t-SNARE domain      | NM_145003     | NM_145003                   |
| 3.40E+02 | 8.41E+00  | tetratricopeptide   | tetratricopeptide   | NM_017931     | NM_017931                   |
| 3.40E+02 | 8.41E+00  | tetratricopeptide   | tetratricopeptide   | NM_017931     | NM_017931                   |
| 3.39E+02 | 8.41E+00  | zinc finger, CCHC   | zinc finger, CCHC   | NM_015144     | NM_015144                   |
| 3.39E+02 | 8.41E+00  | zinc finger, CCHC   | zinc finger, CCHC   | NM_015144     | NM_015144                   |
| 3.39E+02 | 8.41E+00  | zinc finger, CCHC   | zinc finger, CCHC   | NM_015144     | NM_015144                   |
| 3.39E+02 | 8.41E+00  | zinc finger, CCHC   | zinc finger, CCHC   | NM_015144     | NM_015144                   |
| 3.81E+02 | 8.57E+00  | F-box and WD re     | F-box and WD re     | NM_018998     | NM_018998                   |
| 3.81E+02 | 8.57E+00  | F-box and WD re     | F-box and WD re     | NM_018998     | NM_018998                   |
| 1.49E+00 | 5.77E-01  | SEC16 homolog /     | SEC16 homolog /     | NM_014866     | NM_014866                   |
| 1.49E+00 | 5.77E-01  | SEC16 homolog /     | SEC16 homolog /     | NM_014866     | NM_014866                   |
| 1.49E+00 | 5.77E-01  | SEC16 homolog /     | SEC16 homolog /     | NM_014866     | NM_014866                   |
| 3.12E+02 | 8.29E+00  | melanoma antig      | melanoma antig      | NM_002362     | NM_002362                   |
| 3.12E+02 | 8.29E+00  | melanoma antig      | melanoma antig      | NM_001011549  | NM_001011549                |
| 3.12E+02 | 8.29E+00  | melanoma antig      | melanoma antig      | NM_001011549  | NM_001011549                |
| 3.56E+02 | 8.48E+00  | rhomboid, veinle    | STIP1 homology      | NM_003961     | NM_003961                   |
| 2.69E+02 | 8.07E+00  | cytospin A          | adenosine A2a re    | NM_015330,NM  | NM_015330,NM_001145468      |
| 3.84E+02 | 8.59E+00  | Ras and Rab inte    | Ras and Rab inte    | NM_024832     | NM_024832                   |
| 3.84E+02 | 8.59E+00  | Ras and Rab inte    | Ras and Rab inte    | NM_024832     | NM_024832                   |
| 1.54E+00 | 6.27E-01  | chromosome 10       | La ribonucleopro    | NR_027152,NR_ | (NR_027152,NR_027151        |
| 1.54E+00 | 6.27E-01  | chromosome 10       | La ribonucleopro    | NR_027152,NR_ | (NR_027152,NR_027151        |
| 2.94E+02 | 8.20E+00  | polymerase (RNA     | piwi-like 2 (Dros   | NM_001722     | NM_001722                   |

|          |           |                                                                                  |              |
|----------|-----------|----------------------------------------------------------------------------------|--------------|
| 2.83E+02 | 8.14E+00  | unc-51-like kinas pseudouridylate NM_003565                                      | NM_003565    |
| 1.29E+00 | 3.65E-01  | nuclear factor of nuclear factor of NM_172387,NM_172387,NM_172389                |              |
| 3.59E+02 | 8.49E+00  | ribosomal protei ubiquitin-conjug; NM_000991,NM_000991,NM_001136134,NM_001136134 |              |
| 3.59E+02 | 8.49E+00  | ubiquitin-conjug; ubiquitin-conjug; NM_014501                                    | NM_014501    |
| 1.99E+00 | 9.94E-01  | exocyst complex exocyst complex NM_018303                                        | NM_018303    |
| 1.99E+00 | 9.94E-01  | exocyst complex exocyst complex NM_018303                                        | NM_018303    |
| 2.72E+02 | 8.09E+00  | nuclear receptor nuclear receptor NM_016346,NM_016346,NM_014249                  |              |
| 2.72E+02 | 8.09E+00  | nuclear receptor nuclear receptor NM_016346,NM_016346,NM_014249                  |              |
| 3.73E+02 | 8.54E+00  | CUGBP, Elav-like CUGBP, Elav-like NM_001025087, NM_001025087,NM_020180,NM_020180 |              |
| 3.00E+02 | 8.23E+00  | N-sulfoglucosam N-sulfoglucosam NM_000199                                        | NM_000199    |
| 3.34E-03 | -8.22E+00 | family with sequi zyxin NM_001031690, NM_001031690,NM_014690                     |              |
| 3.86E+02 | 8.59E+00  | cholinergic recep cholinergic recep NM_000742                                    | NM_000742    |
| 3.90E+02 | 8.61E+00  | regulatory factor regulatory factor NM_000635,NM_000635,NM_134433                |              |
| 1.32E+00 | 4.02E-01  | calmodulin bindi calmodulin bindi NM_015215                                      | NM_015215    |
| 4.34E+02 | 8.76E+00  | C-type lectin don C-type lectin don NM_015226                                    | NM_015226    |
| 1.27E+00 | 3.47E-01  | apolipoprotein B ATPase family, A NM_000384                                      | NM_000384    |
| 1.27E+00 | 3.47E-01  | apolipoprotein B ATPase family, A NM_000384                                      | NM_000384    |
| 4.06E+02 | 8.66E+00  | chromosome 9 o spermatid perinu NR_026677                                        | NR_026677    |
| 4.16E+02 | 8.70E+00  | chorionic gonadc neurotrophin 4 NM_033142                                        | NM_033142    |
| 4.35E+02 | 8.76E+00  | adaptor-related j adaptor-related j NM_003938                                    | NM_003938    |
| 1.35E+00 | 4.29E-01  | aquaporin 12B aquaporin 12A NM_001102467                                         | NM_001102467 |
| 1.35E+00 | 4.29E-01  | aquaporin 12B aquaporin 12A NM_001102467                                         | NM_001102467 |
| 1.24E+00 | 3.13E-01  | fms-related tyros fms-related tyros NM_002020                                    | NM_002020    |
| 3.41E+02 | 8.41E+00  | solute carrier fan solute carrier fan NM_004174                                  | NM_004174    |
| 3.41E+02 | 8.41E+00  | solute carrier fan solute carrier fan NM_004174                                  | NM_004174    |
| 3.02E+02 | 8.24E+00  | FERM domain co FERM domain co NM_024919,NM_024919,NM_001122841                   |              |
| 3.02E+02 | 8.24E+00  | FERM domain co FERM domain co NM_024919,NM_024919,NM_001122841                   |              |
| 3.50E+02 | 8.45E+00  | kinocilin kinocilin NM_001097611                                                 | NM_001097611 |
| 3.50E+02 | 8.45E+00  | kinocilin kinocilin NM_001097611                                                 | NM_001097611 |
| 3.18E+02 | 8.31E+00  | chitinase domain chitinase domain NM_023947,NM_023947,NM_001142674,NM_001142674  |              |
| 1.19E+00 | 2.48E-01  | dynein, axonema dynein, axonema NM_020877                                        | NM_020877    |
| 1.19E+00 | 2.48E-01  | dynein, axonema dynein, axonema NM_020877                                        | NM_020877    |
| 1.19E+00 | 2.48E-01  | ribosomal protei ribosomal protei NR_002778                                      | NR_002778    |
| 1.67E+00 | 7.42E-01  | active BCR-relate active BCR-relate NM_001159746                                 | NM_001159746 |
| 1.67E+00 | 7.42E-01  | active BCR-relate active BCR-relate NM_001159746                                 | NM_001159746 |
| 1.67E+00 | 7.42E-01  | active BCR-relate active BCR-relate NM_001159746                                 | NM_001159746 |
| 2.01E+00 | 1.01E+00  | early growth resj early growth resj NM_001964                                    | NM_001964    |
| 2.01E+00 | 1.01E+00  | early growth resj early growth resj NM_001964                                    | NM_001964    |
| 2.27E+00 | 1.18E+00  | NK6 homeobox 2 chromosome 10 NM_177400                                           | NM_177400    |
| 2.27E+00 | 1.18E+00  | acetylserotonin ( acetylserotonin ( NM_004192                                    | NM_004192    |
| 2.27E+00 | 1.18E+00  | acetylserotonin ( acetylserotonin ( NM_004192                                    | NM_004192    |
| 3.18E+02 | 8.31E+00  | hypothetical LOC lymphocyte-spec NR_015424                                       | NR_015424    |
| 3.18E+02 | 8.31E+00  | hypothetical LOC lymphocyte-spec NR_015424                                       | NR_015424    |
| 3.99E+02 | 8.64E+00  | triosephosphate mitogen-activate NR_002187                                       | NR_002187    |
| 3.47E+02 | 8.44E+00  | inositol polyphos inositol polyphos NM_019892                                    | NM_019892    |
| 2.94E+02 | 8.20E+00  | SH3-domain binc SH3-domain binc NM_001122681                                     | NM_001122681 |
| 2.91E+02 | 8.18E+00  | C2 calcium-depe C2 calcium-depe NM_001136263                                     | NM_001136263 |
| 1.34E+00 | 4.24E-01  | galanin receptor sal-like 3 (Drosoj NM_001480                                    | NM_001480    |
| 1.34E+00 | 4.24E-01  | galanin receptor sal-like 3 (Drosoj NM_001480                                    | NM_001480    |
| 2.99E+02 | 8.22E+00  | small nuclear ribi small nuclear ribi NM_003097,NM_003097,NM_005678              |              |
| 2.03E+00 | 1.02E+00  | tetraspanin 4 tetraspanin 4 NM_001025237                                         | NM_001025237 |
| 1.77E+00 | 8.24E-01  | forkhead box P4 forkhead box P4 NM_138457,NM_138457,NM_001012426,NM_001012426    |              |
| 1.77E+00 | 8.24E-01  | forkhead box P4 forkhead box P4 NM_138457,NM_138457,NM_001012426,NM_001012426    |              |
| 2.04E+00 | 1.03E+00  | chromosome 10 La ribonucleopro NR_027152,NR_027152,NR_027151                     |              |
| 3.41E+02 | 8.41E+00  | zinc finger protei zinc finger protei NM_198526                                  | NM_198526    |
| 3.41E+02 | 8.41E+00  | zinc finger protei zinc finger protei NM_198526                                  | NM_198526    |
| 3.06E+02 | 8.26E+00  | leukemia inhibitc leukemia inhibitc NM_002309                                    | NM_002309    |
| 3.53E+02 | 8.46E+00  | heparan sulfate ( placenta-specific NM_004807                                    | NM_004807    |

|          |           |                                             |                                                                |                                                        |
|----------|-----------|---------------------------------------------|----------------------------------------------------------------|--------------------------------------------------------|
| 3.53E+02 | 8.46E+00  | heparan sulfate (placenta-specific          | NM_004807                                                      | NM_004807                                              |
| 1.50E+00 | 5.85E-01  | KIAA1211                                    | KIAA1211 NM_020722                                             | NM_020722                                              |
| 1.50E+00 | 5.85E-01  | KIAA1211                                    | KIAA1211 NM_020722                                             | NM_020722                                              |
| 1.66E+00 | 7.33E-01  | WD repeat domain zinc finger, MYNI          | NM_138778                                                      | NM_138778                                              |
| 1.66E+00 | 7.33E-01  | WD repeat domain zinc finger, MYNI          | NM_138778                                                      | NM_138778                                              |
| 3.16E+02 | 8.30E+00  | tubulin polymeri                            | tubulin polymeri: NM_007030                                    | NM_007030                                              |
| 3.16E+02 | 8.30E+00  | tubulin polymeri                            | tubulin polymeri: NM_007030                                    | NM_007030                                              |
| 2.89E+02 | 8.17E+00  | fibroblast growth factor ring finger protei | NM_021923                                                      | NM_021923                                              |
| 2.89E+02 | 8.17E+00  | fibroblast growth factor ring finger protei | NM_021923                                                      | NM_021923                                              |
| 2.15E+00 | 1.11E+00  | glycerophosphoc mitogen-activate            | NM_024307                                                      | NM_024307                                              |
| 1.56E+00 | 6.40E-01  | BEN domain con                              | BEN domain con: NM_001080450                                   | NM_001080450                                           |
| 4.63E+02 | 8.86E+00  | DnaJ (Hsp40) hom                            | DnaJ (Hsp40) hom: NM_025219                                    | NM_025219                                              |
| 4.63E+02 | 8.86E+00  | DnaJ (Hsp40) hom                            | DnaJ (Hsp40) hom: NM_025219                                    | NM_025219                                              |
| 4.63E+02 | 8.86E+00  | DnaJ (Hsp40) hom                            | DnaJ (Hsp40) hom: NM_025219                                    | NM_025219                                              |
| 3.44E+02 | 8.43E+00  | chromosome 16                               | chromosome 16: NM_001080524                                    | NM_001080524                                           |
| 3.82E+02 | 8.58E+00  | carboxypeptidasi                            | carboxypeptidasi: NM_001080513                                 | NM_001080513                                           |
| 3.82E+02 | 8.58E+00  | carboxypeptidasi                            | carboxypeptidasi: NM_001080513                                 | NM_001080513                                           |
| 3.82E+02 | 8.58E+00  | carboxypeptidasi                            | carboxypeptidasi: NM_001080513                                 | NM_001080513                                           |
| 2.87E-03 | -8.44E+00 | cation channel, s                           | cation channel, s: NR_002318                                   | NR_002318                                              |
| 1.20E+00 | 2.59E-01  | polymerase (RNA) fibroblast growth factor   | NM_005035                                                      | NM_005035                                              |
| 1.20E+00 | 2.59E-01  | polymerase (RNA) fibroblast growth factor   | NM_005035                                                      | NM_005035                                              |
| 2.76E+02 | 8.11E+00  | solute carrier fan dipeptidase 3            | NM_001145963, NM_001145963, NM_001145964, NM_001145964         | NM_001145963, NM_001145963, NM_001145964, NM_001145964 |
| 1.32E+00 | 4.01E-01  | C1q and tumor necrosis calcium channel,     | NM_207419                                                      | NM_207419                                              |
| 1.32E+00 | 4.01E-01  | C1q and tumor necrosis calcium channel,     | NM_207419                                                      | NM_207419                                              |
| 4.06E+02 | 8.66E+00  | chromosome 20 cadherin 4, type              | NM_173644                                                      | NM_173644                                              |
| 4.06E+02 | 8.66E+00  | chromosome 20 cadherin 4, type              | NM_173644                                                      | NM_173644                                              |
| 2.83E+02 | 8.15E+00  | hypothetical protein delta-like 1 (Dros)    | NR_002787                                                      | NR_002787                                              |
| 2.83E+02 | 8.15E+00  | hypothetical protein delta-like 1 (Dros)    | NR_002787                                                      | NR_002787                                              |
| 3.61E+02 | 8.49E+00  | testis expressed                            | testis expressed: NM_031451                                    | NM_031451                                              |
| 3.61E+02 | 8.49E+00  | testis expressed                            | testis expressed: NM_031451                                    | NM_031451                                              |
| 3.61E+02 | 8.49E+00  | testis expressed                            | testis expressed: NM_031451                                    | NM_031451                                              |
| 3.08E+02 | 8.27E+00  | lamin A/C                                   | lamin A/C: NM_005572, NM_005572, NM_170707, NM_170707          | NM_005572, NM_005572, NM_170707, NM_170707             |
| 1.67E+00 | 7.36E-01  | MGC44478                                    | deltex homolog: NR_003262                                      | NR_003262                                              |
| 1.67E+00 | 7.36E-01  | MGC44478                                    | deltex homolog: NR_003262                                      | NR_003262                                              |
| 1.66E+00 | 7.33E-01  | adaptor-related                             | adaptor-related: NM_130787, NM_130787, NM_014203               | NM_130787, NM_130787, NM_014203                        |
| 1.66E+00 | 7.33E-01  | adaptor-related                             | adaptor-related: NM_130787, NM_130787, NM_014203               | NM_130787, NM_130787, NM_014203                        |
| 3.70E-03 | -8.08E+00 | AN1, ubiquitin-like family with sequ        | NM_174890, NM_174890, NM_001128324                             | NM_174890, NM_174890, NM_001128324                     |
| 3.17E+02 | 8.31E+00  | protein kinase, c                           | protein kinase, c: NM_002735                                   | NM_002735                                              |
| 3.17E+02 | 8.31E+00  | protein kinase, c                           | protein kinase, c: NM_002735                                   | NM_002735                                              |
| 3.17E+02 | 8.31E+00  | protein kinase, c                           | protein kinase, c: NM_002735                                   | NM_002735                                              |
| 3.08E+02 | 8.27E+00  | cancer/testis ant                           | cancer/testis ant: NM_001017438                                | NM_001017438                                           |
| 3.98E-03 | -7.97E+00 | hypothetical LOC grainyhead-like 3          | NR_027087                                                      | NR_027087                                              |
| 4.67E+02 | 8.87E+00  | zinc finger and B'                          | zinc finger and B': NM_001145338, NM_001145338, NM_005453      | NM_001145338, NM_001145338, NM_005453                  |
| 4.67E+02 | 8.87E+00  | zinc finger and B'                          | zinc finger and B': NM_001145338, NM_001145338, NM_005453      | NM_001145338, NM_001145338, NM_005453                  |
| 4.67E+02 | 8.87E+00  | zinc finger and B'                          | zinc finger and B': NM_001145338, NM_001145338, NM_005453      | NM_001145338, NM_001145338, NM_005453                  |
| 4.67E+02 | 8.87E+00  | zinc finger and B'                          | zinc finger and B': NM_001145338, NM_001145338, NM_005453      | NM_001145338, NM_001145338, NM_005453                  |
| 3.28E+02 | 8.36E+00  | immunoglobulin                              | immunoglobulin: NM_020962                                      | NM_020962                                              |
| 3.28E+02 | 8.36E+00  | immunoglobulin                              | immunoglobulin: NM_020962                                      | NM_020962                                              |
| 1.45E+00 | 5.35E-01  | membrane-associated leucine-rich            | NM_017923                                                      | NM_017923                                              |
| 3.87E-03 | -8.01E+00 | solute carrier fan hypoxia up-regul         | NM_001467                                                      | NM_001467                                              |
| 3.25E+02 | 8.34E+00  | acyl-CoA thioester                          | acyl-CoA thioester: NM_181866, NM_181866, NM_181865, NM_181865 | NM_181866, NM_181866, NM_181865, NM_181865             |
| 1.96E+00 | 9.69E-01  | DIP2 disco-intera                           | DIP2 disco-intera: NM_014974                                   | NM_014974                                              |
| 3.25E+02 | 8.34E+00  | protein phosphatase short stature hom       | NM_013239, NM_013239, NM_199326                                | NM_013239, NM_013239, NM_199326                        |
| 3.16E+02 | 8.30E+00  | ADAMTS-like 5                               | polo-like kinase 5: NM_213604                                  | NM_213604                                              |
| 7.79E-01 | -3.60E-01 | golgi-associated,                           | golgi-associated, NM_014001, NM_014001, NM_138619              | NM_014001, NM_014001, NM_138619                        |
| 7.79E-01 | -3.60E-01 | golgi-associated,                           | golgi-associated, NM_014001, NM_014001, NM_138619              | NM_014001, NM_014001, NM_138619                        |
| 3.50E+02 | 8.45E+00  | bromodomain cc                              | bromodomain cc: NM_007371                                      | NM_007371                                              |
| 1.40E+00 | 4.87E-01  | protocadherin g                             | protocadherin g: NM_003735, NM_003735, NM_032094               | NM_003735, NM_003735, NM_032094                        |

|          |           |                                         |                                                        |
|----------|-----------|-----------------------------------------|--------------------------------------------------------|
| 1.40E+00 | 4.87E-01  | protocadherin ga protocadherin ga       | NM_003735,NM_003735,NM_032094                          |
| 1.40E+00 | 4.87E-01  | protocadherin ga protocadherin ga       | NM_003735,NM_003735,NM_032094                          |
| 3.16E+02 | 8.30E+00  | myocilin, trabecu vesicle-associate     | NM_000261 NM_000261                                    |
| 3.60E+02 | 8.49E+00  | SHC (Src homolo SHC (Src homolo         | NM_012435 NM_012435                                    |
| 2.79E+02 | 8.12E+00  | solute carrier fan microtubule assc     | NM_181785,NM_181785,NM_001135919                       |
| 7.49E-01 | -4.16E-01 | phosducin-like 2 phosducin-like 2       | NM_152401 NM_152401                                    |
| 7.49E-01 | -4.16E-01 | phosducin-like 2 phosducin-like 2       | NM_152401 NM_152401                                    |
| 1.25E+00 | 3.24E-01  | lymphocyte antię HLA-B associatec       | NM_025262 NM_025262                                    |
| 1.40E+00 | 4.85E-01  | RNA polymerase RUN domain con           | NR_003369 NR_003369                                    |
| 1.28E+00 | 3.57E-01  | acyl-CoA oxidase acyl-CoA oxidase       | NM_003501,NM_003501,NM_001101667                       |
| 1.28E+00 | 3.57E-01  | acyl-CoA oxidase acyl-CoA oxidase       | NM_003501,NM_003501,NM_001101667                       |
| 3.61E+02 | 8.50E+00  | similar to HGC6. kinesin family m       | NM_001129895 NM_001129895                              |
| 3.79E+02 | 8.57E+00  | transmembrane LIM domain bind           | NM_153365 NM_153365                                    |
| 3.79E+02 | 8.57E+00  | transmembrane LIM domain bind           | NM_153365 NM_153365                                    |
| 3.06E+02 | 8.26E+00  | aspartate beta-h aspartate beta-h       | NM_181718 NM_181718                                    |
| 3.06E+02 | 8.26E+00  | aspartate beta-h aspartate beta-h       | NM_181718 NM_181718                                    |
| 1.68E+00 | 7.52E-01  | baculoviral IAP r zinc finger protei    | NM_033341 NM_033341                                    |
| 3.86E+02 | 8.59E+00  | nischarin nischarin                     | NM_007184 NM_007184                                    |
| 1.64E+00 | 7.13E-01  | ubiquitin-like wit ubiquitin-like wit   | NM_013282 NM_013282                                    |
| 2.96E+02 | 8.21E+00  | lipocalin 6 lipocalin 6                 | NM_198946 NM_198946                                    |
| 2.96E+02 | 8.21E+00  | lipocalin 6 lipocalin 6                 | NM_198946 NM_198946                                    |
| 2.95E+02 | 8.21E+00  | hypothetical LOC transmembrane          | NR_024473 NR_024473                                    |
| 4.49E+02 | 8.81E+00  | kinase non-catal kinase non-catal       | NM_152643 NM_152643                                    |
| 1.23E+00 | 3.00E-01  | cell wall biogene DCN1, defective       | NM_025087 NM_025087                                    |
| 3.26E+02 | 8.35E+00  | SHC (Src homolo SHC (Src homolo         | NM_012435 NM_012435                                    |
| 3.24E+02 | 8.34E+00  | chloride channel chloride channel       | NM_001287,NM_001287,NM_001114331                       |
| 3.21E+02 | 8.33E+00  | dipeptidase 1 (re dipeptidase 1 (re     | NM_001128141 NM_001128141                              |
| 2.94E-03 | -8.41E+00 | solute carrier fan protein phosphat     | NM_001135153 NM_001135153                              |
| 1.25E+00 | 3.25E-01  | testis-specific tra testis-specific tra | NR_003593,NR_003593,NR_001540                          |
| 1.25E+00 | 3.25E-01  | testis-specific tra testis-specific tra | NR_003593,NR_003593,NR_001540                          |
| 3.08E+02 | 8.27E+00  | RAS p21 protein RAS p21 protein         | NM_007368 NM_007368                                    |
| 3.08E+02 | 8.27E+00  | RAS p21 protein RAS p21 protein         | NM_007368 NM_007368                                    |
| 1.99E+00 | 9.93E-01  | discs, large (Dros discs, large (Dros   | NM_014902 NM_014902                                    |
| 1.82E+00 | 8.66E-01  | netrin 3 netrin 3                       | NM_006181 NM_006181                                    |
| 2.96E+02 | 8.21E+00  | FAT tumor suppr zinc finger protei      | NM_005245 NM_005245                                    |
| 2.96E+02 | 8.21E+00  | FAT tumor suppr zinc finger protei      | NM_005245 NM_005245                                    |
| 2.79E+02 | 8.12E+00  | zinc finger protei integrator compl     | NM_015852 NM_015852                                    |
| 2.79E+02 | 8.12E+00  | zinc finger protei integrator compl     | NM_015852 NM_015852                                    |
| 1.28E+00 | 3.59E-01  | carbonic anhydr kinesin family m        | NM_020178,NM_020178,NM_001082533,NM_001082533          |
| 1.28E+00 | 3.59E-01  | kinesin family m kinesin family m       | NM_032559 NM_032559                                    |
| 4.04E+02 | 8.66E+00  | chromosome 7 o chromosome 7 o           | NM_001134395, NM_001134395, NM_001134396, NM_001134396 |
| 4.04E+02 | 8.66E+00  | G protein-couple G protein-couple       | NM_138445 NM_138445                                    |
| 4.04E+02 | 8.66E+00  | G protein-couple G protein-couple       | NM_138445 NM_138445                                    |
| 1.88E+00 | 9.13E-01  | telomerase rever telomerase rever       | NM_198253,NM_198253,NM_198255                          |
| 2.94E+02 | 8.20E+00  | fizzy/cell division fizzy/cell division | NM_001136197, NM_001136197, NM_001136198               |
| 3.38E-03 | -8.21E+00 | MOCO sulphuras MOCO sulphuras           | NM_017898 NM_017898                                    |
| 3.40E-03 | -8.20E+00 | collagen, type IX, collagen, type IX,   | NM_001851,NM_001851,NM_078485                          |
| 3.31E+02 | 8.37E+00  | alveolar soft part alveolar soft part   | NM_024083 NM_024083                                    |
| 3.32E+02 | 8.38E+00  | fibroblast growth fibroblast growth     | NM_019113 NM_019113                                    |
| 3.15E+02 | 8.30E+00  | wntless homolog wntless homolog         | NM_024911 NM_024911                                    |
| 1.41E+00 | 4.99E-01  | guanine nucleoti calmodulin-like 6      | NM_002074 NM_002074                                    |
| 3.21E+02 | 8.33E+00  | chromosome 19 chromosome 19             | NM_175063,NM_175063,NM_206538                          |
| 3.86E+02 | 8.59E+00  | protein phosphat protein phosphat       | NM_013239,NM_013239,NM_199326                          |
| 3.86E+02 | 8.59E+00  | protein phosphat protein phosphat       | NM_013239,NM_013239,NM_199326                          |
| 4.01E+02 | 8.65E+00  | integrator compl integrator compl       | NM_001080453 NM_001080453                              |
| 4.01E+02 | 8.65E+00  | integrator compl integrator compl       | NM_001080453 NM_001080453                              |
| 2.74E+02 | 8.10E+00  | ADAM metallope ADAM metallope           | NM_014244 NM_014244                                    |
| 2.74E+02 | 8.10E+00  | ADAM metallope ADAM metallope           | NM_014244 NM_014244                                    |

|          |           |                                                                                   |
|----------|-----------|-----------------------------------------------------------------------------------|
| 4.04E+02 | 8.66E+00  | chromosome 7 o chromosome 7 o NM_001134395, NM_001134395, NM_001134396, N         |
| 1.46E+00 | 5.51E-01  | chromosome 1 o Fc fragment of Ig NM_001013625 NM_001013625                        |
| 1.46E+00 | 5.51E-01  | chromosome 1 o Fc fragment of Ig NM_001013625 NM_001013625                        |
| 1.46E+00 | 5.51E-01  | chromosome 1 o Fc fragment of Ig NM_001013625 NM_001013625                        |
| 1.46E+00 | 5.51E-01  | chromosome 1 o Fc fragment of Ig NM_001013625 NM_001013625                        |
| 1.46E+00 | 5.51E-01  | chromosome 1 o Fc fragment of Ig NM_001013625 NM_001013625                        |
| 1.46E+00 | 5.51E-01  | chromosome 1 o Fc fragment of Ig NM_001013625 NM_001013625                        |
| 1.46E+00 | 5.51E-01  | chromosome 1 o Fc fragment of Ig NM_001013625 NM_001013625                        |
| 1.46E+00 | 5.51E-01  | chromosome 1 o Fc fragment of Ig NM_001013625 NM_001013625                        |
| 1.85E+00 | 8.85E-01  | zinc finger protei zinc finger protei NM_001159279 NM_001159279                   |
| 1.85E+00 | 8.85E-01  | zinc finger protei zinc finger protei NM_001159279 NM_001159279                   |
| 1.19E+00 | 2.55E-01  | glutamine-fructo CCR4-NOT transc NM_005110 NM_005110                              |
| 1.19E+00 | 2.55E-01  | glutamine-fructo CCR4-NOT transc NM_005110 NM_005110                              |
| 3.97E+02 | 8.63E+00  | family with sequi family with sequi NM_015381 NM_015381                           |
| 3.97E+02 | 8.63E+00  | family with sequi family with sequi NM_015381 NM_015381                           |
| 3.38E+02 | 8.40E+00  | transcription fact transcription fact NM_001042425, NM_001042425, NM_003220, NM_  |
| 3.29E+02 | 8.36E+00  | inositol polyphos inositol polyphos NM_019892 NM_019892                           |
| 3.29E+02 | 8.36E+00  | inositol polyphos inositol polyphos NM_019892 NM_019892                           |
| 3.61E+02 | 8.49E+00  | glutamate recept chromosome 3 o NM_001080423 NM_001080423                         |
| 1.26E+00 | 3.31E-01  | hypothetical LOC hypothetical LOC NR_015454 NR_015454                             |
| 1.26E+00 | 3.31E-01  | hypothetical LOC hypothetical LOC NR_015454 NR_015454                             |
| 3.49E+02 | 8.45E+00  | N-acetylglucosan N-acetylglucosan NM_032520 NM_032520                             |
| 3.49E+02 | 8.45E+00  | N-acetylglucosan N-acetylglucosan NM_032520 NM_032520                             |
| 2.81E+02 | 8.13E+00  | thimet oligopept thimet oligopept NM_003249 NM_003249                             |
| 2.81E+02 | 8.13E+00  | thimet oligopept thimet oligopept NM_003249 NM_003249                             |
| 3.82E-03 | -8.03E+00 | chromosome 1 o nuclear factor I// NM_152377 NM_152377                             |
| 3.10E+02 | 8.28E+00  | chromosome 14 delta-like 1 homi NR_024096 NR_024096                               |
| 3.34E+02 | 8.38E+00  | hypothetical LOC fibrosin-like 1 NR_024563 NR_024563                              |
| 3.06E+02 | 8.26E+00  | ATP-binding cass ATP-binding cass NM_019112 NM_019112                             |
| 3.06E+02 | 8.26E+00  | ATP-binding cass ATP-binding cass NM_019112 NM_019112                             |
| 3.05E+02 | 8.25E+00  | MAD1 mitotic ar MAD1 mitotic ar NM_003550, NM_003550, NM_001013837, NM_           |
| 3.05E+02 | 8.25E+00  | MAD1 mitotic ar MAD1 mitotic ar NM_003550, NM_003550, NM_001013837, NM_           |
| 3.04E+02 | 8.25E+00  | solute carrier fan hypothetical pro NM_001080431 NM_001080431                     |
| 1.42E+00 | 5.04E-01  | transcription fact transcription fact NM_014553 NM_014553                         |
| 1.42E+00 | 5.04E-01  | transcription fact transcription fact NM_014553 NM_014553                         |
| 3.04E+02 | 8.25E+00  | dynein, axonema dynein, axonema NM_207437 NM_207437                               |
| 1.44E+00 | 5.24E-01  | cytochrome b-56 angiotensin I con NM_001017917, NM_001017917, NM_001017916, N     |
| 1.27E+00 | 3.48E-01  | leucine rich repe leucine rich repe NM_020710 NM_020710                           |
| 3.17E+02 | 8.31E+00  | tubulin tyrosine I megalencephalic NM_001080447 NM_001080447                      |
| 3.12E+02 | 8.29E+00  | mex-3 homolog / mex-3 homolog / NM_001093725 NM_001093725                         |
| 3.12E+02 | 8.29E+00  | mex-3 homolog / mex-3 homolog / NM_001093725 NM_001093725                         |
| 3.12E+02 | 8.29E+00  | mex-3 homolog / mex-3 homolog / NM_001093725 NM_001093725                         |
| 3.83E+02 | 8.58E+00  | CHRNA7 (choline CHRNA7 (choline NM_148911, NM_148911, NM_139320                   |
| 3.33E-03 | -8.23E+00 | proteasome (pro proteasome (pro NM_002813 NM_002813                               |
| 3.33E-03 | -8.23E+00 | proteasome (pro proteasome (pro NM_002813 NM_002813                               |
| 4.29E+02 | 8.75E+00  | G protein-couple zinc finger, AN1- NM_001098201 NM_001098201                      |
| 4.29E+02 | 8.75E+00  | G protein-couple zinc finger, AN1- NM_001098201 NM_001098201                      |
| 2.11E+00 | 1.08E+00  | protein tyrosine protein tyrosine NM_130842, NM_130842, NM_130843, NM_002         |
| 1.49E+00 | 5.73E-01  | X antigen family, synovial sarcoma NM_020411, NM_020411, NM_133430, NM_133        |
| 1.49E+00 | 5.73E-01  | X antigen family, synovial sarcoma NM_020411, NM_020411, NM_133430, NM_133        |
| 1.44E+00 | 5.24E-01  | cytochrome b-56 angiotensin I con NM_001017917, NM_001017917, NM_001017916, N     |
| 2.86E+02 | 8.16E+00  | src-related kinas chromosome 20 NM_080823 NM_080823                               |
| 1.27E+00 | 3.50E-01  | BEN domain con BEN domain con NR_027512 NR_027512                                 |
| 1.27E+00 | 3.50E-01  | BEN domain con BEN domain con NR_027512 NR_027512                                 |
| 3.43E+02 | 8.42E+00  | ret finger proteir ret finger proteir NM_001159545, NM_001159545, NM_001098527, N |
| 3.01E+02 | 8.23E+00  | ATPase, class VI, ATPase, class VI, NM_032189, NM_032189, NM_015205               |
| 3.01E+02 | 8.23E+00  | ATPase, class VI, ATPase, class VI, NM_032189, NM_032189, NM_015205               |
| 3.85E+02 | 8.59E+00  | glutamate recept glutamate recept NM_000843 NM_000843                             |



|          |          |                     |                     |                                             |              |
|----------|----------|---------------------|---------------------|---------------------------------------------|--------------|
| 2.69E+02 | 8.07E+00 | scavenger recept    | scavenger recept    | NR_002934                                   | NR_002934    |
| 1.38E+00 | 4.67E-01 | zinc finger protei  | coiled-coil doma    | NM_020787                                   | NM_020787    |
| 1.38E+00 | 4.67E-01 | coiled-coil doma    | coiled-coil doma    | NM_014695                                   | NM_014695    |
| 4.62E+02 | 8.85E+00 | filamin C, gamm     | filamin C, gamm     | NM_001127487, NM_001127487, NM_001458       |              |
| 4.62E+02 | 8.85E+00 | filamin C, gamm     | filamin C, gamm     | NM_001127487, NM_001127487, NM_001458       |              |
| 2.69E+02 | 8.07E+00 | fizzy/cell division | fizzy/cell division | NM_001136197, NM_001136197, NM_001136198    |              |
| 2.86E+02 | 8.16E+00 | lymphocyte antiğ    | glycosylphosphai    | NM_001135655, NM_001135655, NM_002347       |              |
| 2.86E+02 | 8.16E+00 | lymphocyte antiğ    | glycosylphosphai    | NM_001135655, NM_001135655, NM_002347       |              |
| 3.46E+02 | 8.43E+00 | ankyrin repeat d    | ankyrin repeat d    | NM_013275                                   | NM_013275    |
| 2.61E+02 | 8.03E+00 | pre-B lymphocyt     | BMS1 homolog, i     | NM_007128                                   | NM_007128    |
| 2.97E+02 | 8.22E+00 | G protein-couple    | G protein-couple    | NM_005301                                   | NM_005301    |
| 3.91E+02 | 8.61E+00 | family with sequ    | ubiquitin-conjug    | NM_001014980                                | NM_001014980 |
| 3.91E+02 | 8.61E+00 | ubiquitin-conjug    | ubiquitin-conjug    | NM_194458, NM_194458, NM_058167, NM_194     |              |
| 3.91E+02 | 8.61E+00 | ubiquitin-conjug    | ubiquitin-conjug    | NM_194458, NM_194458, NM_058167, NM_194     |              |
| 3.89E+02 | 8.60E+00 | family with sequ    | forkhead box l1     | NM_001129891                                | NM_001129891 |
| 3.89E+02 | 8.60E+00 | family with sequ    | forkhead box l1     | NM_001129891                                | NM_001129891 |
| 4.10E+02 | 8.68E+00 | calcium channel,    | calcium channel,    | NM_021098, NM_021098, NM_001005407          |              |
| 1.26E+00 | 3.33E-01 | sonic hedgehog      | non-protein codi    | NM_000193                                   | NM_000193    |
| 1.26E+00 | 3.33E-01 | sonic hedgehog      | non-protein codi    | NM_000193                                   | NM_000193    |
| 3.85E+02 | 8.59E+00 | transcription elo   | transcription elo   | NM_016427                                   | NM_016427    |
| 1.36E+00 | 4.38E-01 | glutamic-oxaloac    | cadherin 8, type    | NM_002080                                   | NM_002080    |
| 1.36E+00 | 4.38E-01 | glutamic-oxaloac    | cadherin 8, type    | NM_002080                                   | NM_002080    |
| 3.77E+02 | 8.56E+00 | transcription fact  | extracellular leuc  | NR_001288                                   | NR_001288    |
| 3.77E+02 | 8.56E+00 | transcription fact  | extracellular leuc  | NR_001288                                   | NR_001288    |
| 1.76E+00 | 8.15E-01 | troponin T type     | troponin T type     | NM_001042781, NM_001042781, NM_001042782, N |              |
| 1.75E+00 | 8.10E-01 | anoctamin 1, cal    | anoctamin 1, cal    | NM_018043                                   | NM_018043    |
| 1.75E+00 | 8.10E-01 | anoctamin 1, cal    | anoctamin 1, cal    | NM_018043                                   | NM_018043    |
| 3.70E+02 | 8.53E+00 | serine/threonine    | serine/threonine    | NM_173575                                   | NM_173575    |
| 1.15E+00 | 2.07E-01 | NADH dehydrog       | NADH dehydrog       | NM_015965                                   | NM_015965    |
| 1.15E+00 | 2.07E-01 | NADH dehydrog       | NADH dehydrog       | NM_015965                                   | NM_015965    |
| 3.10E+02 | 8.28E+00 | chromosome 19       | chromosome 19       | NM_174983                                   | NM_174983    |
| 3.42E+02 | 8.42E+00 | chromosome 11       | chromosome 11       | NM_013265                                   | NM_013265    |
| 2.60E+02 | 8.02E+00 | proline rich 23C    | proline rich 23C    | NM_001134657                                | NM_001134657 |
| 3.06E+02 | 8.26E+00 | SH3 domain and      | SH3 domain and      | NM_018986                                   | NM_018986    |
| 3.06E+02 | 8.26E+00 | SH3 domain and      | SH3 domain and      | NM_018986                                   | NM_018986    |
| 1.29E+00 | 3.68E-01 | transcription fact  | transcription fact  | NM_001136139, NM_001136139, NM_003200       |              |
| 1.29E+00 | 3.68E-01 | transcription fact  | transcription fact  | NM_001136139, NM_001136139, NM_003200       |              |
| 1.69E+00 | 7.57E-01 | FERM domain co      | FERM domain co      | NM_024919, NM_024919, NM_001122841          |              |
| 1.69E+00 | 7.57E-01 | FERM domain co      | FERM domain co      | NM_024919, NM_024919, NM_001122841          |              |
| 3.65E+02 | 8.51E+00 | FSHD region gen     | zinc finger protei  | NM_001124759                                | NM_001124759 |
| 4.10E+02 | 8.68E+00 | calcium channel,    | calcium channel,    | NM_021098, NM_021098, NM_001005407          |              |
| 3.40E+02 | 8.41E+00 | cholinergic recep   | cholinergic recep   | NM_000744                                   | NM_000744    |
| 3.93E+02 | 8.62E+00 | phosphatidylinos    | phosphatidylinos    | NM_058004, NM_058004, NM_002650             |              |
| 3.94E+02 | 8.62E+00 | zinc finger protei  | zinc finger protei  | NM_133444                                   | NM_133444    |
| 1.50E+00 | 5.80E-01 | DIP2 disco-intera   | DIP2 disco-intera   | NM_014974                                   | NM_014974    |
| 1.50E+00 | 5.80E-01 | DIP2 disco-intera   | DIP2 disco-intera   | NM_014974                                   | NM_014974    |
| 3.55E+02 | 8.47E+00 | potassium voltag    | potassium voltag    | NM_172109                                   | NM_172109    |
| 3.55E+02 | 8.47E+00 | potassium voltag    | potassium voltag    | NM_172109                                   | NM_172109    |
| 2.66E+02 | 8.06E+00 | E2F transcription   | peroxisomal mer     | NM_005225                                   | NM_005225    |
| 3.28E+02 | 8.36E+00 | guanine nucleoti    | proline rich 25     | NM_016541                                   | NM_016541    |
| 1.31E+00 | 3.87E-01 | TBC1 domain fan     | TBC1 domain fan     | NM_020773                                   | NM_020773    |
| 1.31E+00 | 3.87E-01 | TBC1 domain fan     | TBC1 domain fan     | NM_020773                                   | NM_020773    |
| 1.31E+00 | 3.87E-01 | TBC1 domain fan     | TBC1 domain fan     | NM_020773                                   | NM_020773    |
| 1.17E+00 | 2.32E-01 | POTE ankyrin doi    | POTE ankyrin doi    | NM_001005356, NM_001005356, NR_027480       |              |
| 1.17E+00 | 2.32E-01 | POTE ankyrin doi    | POTE ankyrin doi    | NM_001005356, NM_001005356, NR_027480       |              |
| 1.17E+00 | 2.32E-01 | POTE ankyrin doi    | POTE ankyrin doi    | NM_001005356, NM_001005356, NR_027480       |              |
| 1.23E+00 | 2.95E-01 | family with sequ    | family with sequ    | NM_032448                                   | NM_032448    |
| 4.72E+02 | 8.88E+00 | growth hormone      | ADP-ribosylhydr     | NM_024719                                   | NM_024719    |



|          |           |                                                                       |                                                     |                                                     |
|----------|-----------|-----------------------------------------------------------------------|-----------------------------------------------------|-----------------------------------------------------|
| 4.72E+02 | 8.88E+00  | growth hormone ADP-ribosylhydrolase                                   | NM_024719                                           | NM_024719                                           |
| 3.07E+02 | 8.26E+00  | nucleoporin 133 kDa ATP-binding cassette                              | NM_018230                                           | NM_018230                                           |
| 2.68E+02 | 8.06E+00  | WD repeat domain WD repeat domain                                     | NM_173479                                           | NM_173479                                           |
| 3.53E+02 | 8.46E+00  | bromodomain ccd4 bromodomain ccd4                                     | NM_007371                                           | NM_007371                                           |
| 2.98E+02 | 8.22E+00  | C2 calcium-dependent zinc finger protein 1                            | NM_015500,NM_015500,NM_199050                       | NM_015500,NM_015500,NM_199050                       |
| 2.98E+02 | 8.22E+00  | C2 calcium-dependent zinc finger protein 1                            | NM_015500,NM_015500,NM_199050                       | NM_015500,NM_015500,NM_199050                       |
| 1.78E+00 | 8.33E-01  | pericentrin                                                           | NM_006031                                           | NM_006031                                           |
| 1.14E+00 | 1.85E-01  | ankyrin 1, erythrocyte                                                | NM_001142446,NM_001142446,NM_001142445,NM_001142445 | NM_001142446,NM_001142446,NM_001142445,NM_001142445 |
| 1.14E+00 | 1.85E-01  | ankyrin 1, erythrocyte                                                | NM_001142446,NM_001142446,NM_001142445,NM_001142445 | NM_001142446,NM_001142446,NM_001142445,NM_001142445 |
| 4.28E+02 | 8.74E+00  | SIX homeobox 2 S1 RNA binding domain                                  | NM_016932                                           | NM_016932                                           |
| 3.37E+02 | 8.40E+00  | lipooxygenase homolog lipooxygenase homolog                           | NM_144612                                           | NM_144612                                           |
| 1.45E+00 | 5.36E-01  | glutamate-rich 1 discs, large (Drosophila)                            | NM_207332                                           | NM_207332                                           |
| 1.45E+00 | 5.36E-01  | glutamate-rich 1 discs, large (Drosophila)                            | NM_207332                                           | NM_207332                                           |
| 1.45E+00 | 5.36E-01  | glutamate-rich 1 discs, large (Drosophila)                            | NM_207332                                           | NM_207332                                           |
| 3.12E+02 | 8.29E+00  | solute carrier fan solute carrier fan                                 | NM_194255                                           | NM_194255                                           |
| 3.41E+02 | 8.41E+00  | guanine nucleotide binding protein guanine nucleotide binding protein | NM_001098722,NM_001098722,NM_001098721,NM_001098721 | NM_001098722,NM_001098722,NM_001098721,NM_001098721 |
| 3.41E+02 | 8.41E+00  | guanine nucleotide binding protein guanine nucleotide binding protein | NM_001098722,NM_001098722,NM_001098721,NM_001098721 | NM_001098722,NM_001098722,NM_001098721,NM_001098721 |
| 1.35E+00 | 4.30E-01  | sirtuin 7                                                             | NM_016538                                           | NM_016538                                           |
| 2.96E+02 | 8.21E+00  | copine family member copine family member                             | NM_153635                                           | NM_153635                                           |
| 1.36E+00 | 4.41E-01  | BTB (POZ) domain phosphofurin acid phosphatase                        | NM_033271                                           | NM_033271                                           |
| 3.17E+02 | 8.31E+00  | scavenger receptor scavenger receptor                                 | NM_153334,NM_153334,NM_182895                       | NM_153334,NM_153334,NM_182895                       |
| 2.81E+02 | 8.13E+00  | coiled-coil domain malic enzyme 3                                     | NM_001156474,NM_001156474,NM_021827                 | NM_001156474,NM_001156474,NM_021827                 |
| 2.98E+02 | 8.22E+00  | cat eye syndrome cat eye syndrome                                     | NM_017829,NM_017829,NM_033070                       | NM_017829,NM_017829,NM_033070                       |
| 2.98E+02 | 8.22E+00  | cat eye syndrome cat eye syndrome                                     | NM_017829,NM_017829,NM_033070                       | NM_017829,NM_017829,NM_033070                       |
| 4.59E+02 | 8.84E+00  | polycomb group                                                        | NM_006315                                           | NM_006315                                           |
| 4.59E+02 | 8.84E+00  | polycomb group                                                        | NM_006315                                           | NM_006315                                           |
| 4.59E+02 | 8.84E+00  | polycomb group                                                        | NM_006315                                           | NM_006315                                           |
| 2.09E+00 | 1.06E+00  | heparan sulfate proteoglycan heparan sulfate proteoglycan             | NM_005529                                           | NM_005529                                           |
| 3.76E+02 | 8.56E+00  | POTE ankyrin domain similar to cDNA sequence                          | NM_174981                                           | NM_174981                                           |
| 3.76E+02 | 8.56E+00  | POTE ankyrin domain similar to cDNA sequence                          | NM_174981                                           | NM_174981                                           |
| 3.44E+02 | 8.43E+00  | small nucleolar RNA DIO3 opposite strand                              | NR_003224                                           | NR_003224                                           |
| 3.60E+02 | 8.49E+00  | hypothetical protein neurotensin receptor                             | NR_024470                                           | NR_024470                                           |
| 1.81E+00 | 8.58E-01  | chromosome 7 origin core 1 synthase                                   | NM_198097                                           | NM_198097                                           |
| 1.81E+00 | 8.58E-01  | chromosome 7 origin core 1 synthase                                   | NM_198097                                           | NM_198097                                           |
| 2.87E+02 | 8.17E+00  | glutamate receptor                                                    | NM_138690                                           | NM_138690                                           |
| 4.41E+02 | 8.79E+00  | chromosome 21                                                         | NR_027243                                           | NR_027243                                           |
| 2.97E+02 | 8.22E+00  | latent transformant latent transformant                               | NM_000428                                           | NM_000428                                           |
| 2.97E+02 | 8.22E+00  | latent transformant latent transformant                               | NM_000428                                           | NM_000428                                           |
| 1.14E+00 | 1.92E-01  | protein phosphatase protein phosphatase                               | NM_014678                                           | NM_014678                                           |
| 1.14E+00 | 1.92E-01  | protein phosphatase protein phosphatase                               | NM_014678                                           | NM_014678                                           |
| 4.17E+02 | 8.70E+00  | DIP2 disco-interacting DIP2 disco-interacting                         | NM_014974                                           | NM_014974                                           |
| 4.17E+02 | 8.70E+00  | DIP2 disco-interacting DIP2 disco-interacting                         | NM_014974                                           | NM_014974                                           |
| 2.62E+02 | 8.03E+00  | MORN repeat coiled-coil transmembrane                                 | NM_173855                                           | NM_173855                                           |
| 1.34E+00 | 4.18E-01  | methyl-CpG binding CXXC finger 1 (Pfeiffer)                           | NM_015845,NM_015845,NM_015846,NM_0026664            | NM_015845,NM_015845,NM_015846,NM_0026664            |
| 1.39E+00 | 4.80E-01  | hypothetical LOC NADH dehydrogenase                                   | NR_026664                                           | NR_026664                                           |
| 4.21E+02 | 8.72E+00  | complement component complement component                             | NM_001008223                                        | NM_001008223                                        |
| 4.21E+02 | 8.72E+00  | complement component complement component                             | NM_001008223                                        | NM_001008223                                        |
| 3.64E-03 | -8.10E+00 | paired box 4 staphylococcal nuclease                                  | NM_006193                                           | NM_006193                                           |
| 3.30E+02 | 8.37E+00  | netrin 1                                                              | NM_004822                                           | NM_004822                                           |
| 3.30E+02 | 8.37E+00  | netrin 1                                                              | NM_004822                                           | NM_004822                                           |
| 2.70E+02 | 8.08E+00  | glutamate-rich 1 discs, large (Drosophila)                            | NM_207332                                           | NM_207332                                           |
| 4.38E+02 | 8.77E+00  | H19, imprinted non-insulin-like growth factor                         | NR_002196                                           | NR_002196                                           |
| 3.09E+02 | 8.27E+00  | lymphocyte antigen lymphocyte antigen                                 | NM_003695                                           | NM_003695                                           |
| 3.09E+02 | 8.27E+00  | lymphocyte antigen lymphocyte antigen                                 | NM_003695                                           | NM_003695                                           |
| 2.93E+02 | 8.19E+00  | KIAA0415                                                              | NM_014855                                           | NM_014855                                           |
| 2.93E+02 | 8.19E+00  | KIAA0415                                                              | NM_014855                                           | NM_014855                                           |
| 3.13E+02 | 8.29E+00  | v-ski sarcoma virus v-ski sarcoma virus                               | NM_003036                                           | NM_003036                                           |
| 3.49E-03 | -8.16E+00 | sulfotransferase                                                      | NM_177528,NM_177528,NM_001054                       | NM_177528,NM_177528,NM_001054                       |

|          |           |                                    |                    |                                                                                                    |              |
|----------|-----------|------------------------------------|--------------------|----------------------------------------------------------------------------------------------------|--------------|
| 2.94E+02 | 8.20E+00  | keratin 2                          | keratin 2          | NM_000423                                                                                          | NM_000423    |
| 2.83E+02 | 8.14E+00  | integrator compl                   | integrator compl   | NM_001080453                                                                                       | NM_001080453 |
| 3.74E+02 | 8.55E+00  | chromosome 7 o                     | chromosome 7 o     | NM_001134395, NM_001134395, NM_001134396, NM_001134396, NM_001134396, NM_001134396                 |              |
| 3.74E+02 | 8.55E+00  | chromosome 7 o                     | chromosome 7 o     | NM_001134395, NM_001134395, NM_001134396, NM_001134396, NM_001134396, NM_001134396                 |              |
| 2.74E+02 | 8.10E+00  | LY6/PLAUR dom                      | LY6/PLAUR dom      | NM_205545                                                                                          | NM_205545    |
| 3.67E+02 | 8.52E+00  | casein kinase 1, ε                 | casein kinase 1, ε | NR_027320                                                                                          | NR_027320    |
| 3.67E+02 | 8.52E+00  | casein kinase 1, ε                 | hypothetical LOC   | NR_027320                                                                                          | NR_027320    |
| 2.74E+02 | 8.10E+00  | zinc finger protei                 | zinc finger protei | NM_017652                                                                                          | NM_017652    |
| 2.74E+02 | 8.10E+00  | zinc finger protei                 | zinc finger protei | NM_017652                                                                                          | NM_017652    |
| 1.26E+00 | 3.28E-01  | transmembrane                      | transmembrane      | NM_001136218, NM_001136218, NM_018022                                                              |              |
| 2.65E+02 | 8.05E+00  | inositol(myo)-1(c                  | cell death-induci  | NM_014214                                                                                          | NM_014214    |
| 3.06E+02 | 8.26E+00  | dystrophia myoti                   | dystrophia myoti   | NM_004409, NM_004409, NM_001081562, NM_001081562, NM_001081562, NM_001081562                       |              |
| 1.54E+00 | 6.24E-01  | nuclear factor of CTD (carboxy-ter |                    | NM_172387, NM_172387, NM_172389                                                                    |              |
| 1.54E+00 | 6.24E-01  | nuclear factor of CTD (carboxy-ter |                    | NM_172387, NM_172387, NM_172389                                                                    |              |
| 1.54E+00 | 6.24E-01  | nuclear factor of CTD (carboxy-ter |                    | NM_172387, NM_172387, NM_172389                                                                    |              |
| 1.87E+00 | 9.01E-01  | phospholysine pI family with sequ  |                    | NM_022126                                                                                          | NM_022126    |
| 1.87E+00 | 9.01E-01  | phospholysine pI family with sequ  |                    | NM_022126                                                                                          | NM_022126    |
| 1.53E+00 | 6.10E-01  | non-protein codi                   | collagen, type XV  | NR_027498, NM_027498, NM_199175                                                                    |              |
| 2.99E+02 | 8.22E+00  | BAI1-associated                    | BAI1-associated    | NM_003933                                                                                          | NM_003933    |
| 2.99E+02 | 8.22E+00  | BAI1-associated                    | BAI1-associated    | NM_003933                                                                                          | NM_003933    |
| 1.39E+00 | 4.78E-01  | potassium voltag                   | potassium voltag   | NM_004519                                                                                          | NM_004519    |
| 1.39E+00 | 4.78E-01  | potassium voltag                   | potassium voltag   | NM_004519                                                                                          | NM_004519    |
| 3.77E+02 | 8.56E+00  | 5-oxoprolinase (l                  | 5-oxoprolinase (l  | NM_017570                                                                                          | NM_017570    |
| 3.77E+02 | 8.56E+00  | 5-oxoprolinase (l                  | 5-oxoprolinase (l  | NM_017570                                                                                          | NM_017570    |
| 3.75E+02 | 8.55E+00  | acetylserotonin (                  | acetylserotonin (  | NM_004043                                                                                          | NM_004043    |
| 3.27E+02 | 8.35E+00  | kinesin family mε                  | kinesin family mε  | NM_001130099, NM_001130099, NM_005550, NM_005550, NM_001130099, NM_001130099, NM_005550, NM_005550 |              |
| 3.27E+02 | 8.35E+00  | kinesin family mε                  | kinesin family mε  | NM_001130099, NM_001130099, NM_005550, NM_005550, NM_001130099, NM_001130099, NM_005550, NM_005550 |              |
| 3.65E+02 | 8.51E+00  | chromosome 14                      | chromosome 14      | NM_001134875, NM_001134875, NM_001134876                                                           |              |
| 3.65E+02 | 8.51E+00  | chromosome 14                      | chromosome 14      | NM_001134875, NM_001134875, NM_001134876                                                           |              |
| 1.85E+00 | 8.87E-01  | chromosome X o                     | chromosome X o     | NM_001145140, NM_001145140, NM_001145139                                                           |              |
| 1.85E+00 | 8.87E-01  | chromosome X o                     | chromosome X o     | NM_001145140, NM_001145140, NM_001145139                                                           |              |
| 1.51E+00 | 5.95E-01  | intraflagellar trar                | rhodopsin          | NM_052990, NM_052990, NM_052989, NM_052989                                                         |              |
| 3.03E+02 | 8.24E+00  | myosin VA (heav                    | cAMP-regulated     | NM_000259, NM_000259, NM_001142495                                                                 |              |
| 3.21E+02 | 8.33E+00  | small VCP/p97-ir                   | leucine zipper pr  | NM_148893                                                                                          | NM_148893    |
| 3.21E+02 | 8.33E+00  | small VCP/p97-ir                   | leucine zipper pr  | NM_148893                                                                                          | NM_148893    |
| 3.06E+02 | 8.26E+00  | vav 2 guanine nu                   | vav 2 guanine nu   | NM_001134398, NM_001134398, NM_003371                                                              |              |
| 3.73E-03 | -8.07E+00 | synaptotagmin X                    | asparagine-linker  | NM_198992                                                                                          | NM_198992    |
| 3.64E+02 | 8.51E+00  | chromosome 17                      | serpin peptidase   | NM_032895, NM_032895, NM_001001870                                                                 |              |
| 3.64E+02 | 8.51E+00  | chromosome 17                      | serpin peptidase   | NM_032895, NM_032895, NM_001001870                                                                 |              |
| 2.75E+02 | 8.10E+00  | Ras association (                  | Ras association (  | NM_003475, NM_003475, NM_001143994                                                                 |              |
| 2.75E+02 | 8.10E+00  | Ras association (                  | Ras association (  | NM_003475, NM_003475, NM_001143994                                                                 |              |
| 2.04E+00 | 1.03E+00  | MAD1 mitotic ar                    | MAD1 mitotic ar    | NM_003550, NM_003550, NM_001013837, NM_001013837, NM_003550, NM_003550, NM_001013837, NM_001013837 |              |
| 3.67E+02 | 8.52E+00  | peroxidasin hom                    | peroxidasin hom    | NM_012293                                                                                          | NM_012293    |
| 3.15E+02 | 8.30E+00  | retinoid X recept                  | retinoid X recept  | NM_002957                                                                                          | NM_002957    |
| 2.99E+02 | 8.22E+00  | chromosome 2 o                     | ankyrin repeat di  | NM_214461                                                                                          | NM_214461    |
| 2.99E+02 | 8.22E+00  | chromosome 2 o                     | ankyrin repeat di  | NM_214461                                                                                          | NM_214461    |
| 2.99E+02 | 8.22E+00  | chromosome 2 o                     | ankyrin repeat di  | NM_214461                                                                                          | NM_214461    |
| 1.39E+00 | 4.74E-01  | platelet-derived                   | protein kinase, c  | NM_002607, NM_002607, NM_033023                                                                    |              |
| 1.39E+00 | 4.74E-01  | platelet-derived                   | protein kinase, c  | NM_002607, NM_002607, NM_033023                                                                    |              |
| 3.59E+02 | 8.49E+00  | chromosome 16                      | chromosome 16      | NM_001001410                                                                                       | NM_001001410 |
| 3.59E+02 | 8.49E+00  | chromosome 16                      | chromosome 16      | NM_001001410                                                                                       | NM_001001410 |
| 7.29E-01 | -4.57E-01 | antigen p97 (mel                   | discs, large homc  | NM_033316                                                                                          | NM_033316    |
| 5.88E-01 | -7.67E-01 | interleukin 28B (i                 | interleukin 28A (  | NM_172139                                                                                          | NM_172139    |
| 1.36E+00 | 4.42E-01  | KIAA1267                           | leucine rich repe  | NM_015443                                                                                          | NM_015443    |
| 1.36E+00 | 4.42E-01  | KIAA1267                           | leucine rich repe  | NM_015443                                                                                          | NM_015443    |
| 1.36E+00 | 4.42E-01  | leucine rich repe                  | leucine rich repe  | NM_014834                                                                                          | NM_014834    |
| 2.78E+02 | 8.12E+00  | GEM interacting                    | ATPase type 13A    | NM_016573                                                                                          | NM_016573    |
| 3.56E+02 | 8.48E+00  | thimet oligopept                   | thimet oligopept   | NM_003249                                                                                          | NM_003249    |

|          |           |                                                     |                              |
|----------|-----------|-----------------------------------------------------|------------------------------|
| 3.56E+02 | 8.48E+00  | thimet oligopept thimet oligopept NM_003249         | NM_003249                    |
| 3.56E+02 | 8.48E+00  | thimet oligopept thimet oligopept NM_003249         | NM_003249                    |
| 3.01E+02 | 8.23E+00  | sprouty-related, sprouty-related, NM_001042522,     | NM_001042522,NM_001039616    |
| 3.90E+02 | 8.61E+00  | GRB10 interactin GRB10 interactin NM_022574         | NM_022574                    |
| 3.90E+02 | 8.61E+00  | GRB10 interactin GRB10 interactin NM_022574         | NM_022574                    |
| 7.74E-01 | -3.69E-01 | glutamate recept zinc finger CCCH- NM_000831        | NM_000831                    |
| 3.76E+02 | 8.56E+00  | chromosome 3 o chromosome 3 o NM_007354             | NM_007354                    |
| 3.76E+02 | 8.56E+00  | chromosome 3 o chromosome 3 o NM_007354             | NM_007354                    |
| 3.99E+02 | 8.64E+00  | ArfGAP with GTP ArfGAP with GTP NM_014914,NM        | NM_014914,NM_001037131       |
| 3.33E+02 | 8.38E+00  | carboxypeptidas carboxypeptidas NM_001868           | NM_001868                    |
| 1.31E+00 | 3.87E-01  | glioma tumor suj glioma tumor suj NM_015710         | NM_015710                    |
| 4.20E+02 | 8.71E+00  | chloride channel natriuretic peptic NM_021735,NM    | NM_021735,NM_021737,NM_021   |
| 3.69E+02 | 8.53E+00  | G-protein signalii G-protein signalii NM_001145638, | NM_001145638,NM_015597       |
| 3.69E+02 | 8.53E+00  | G-protein signalii G-protein signalii NM_001145639  | NM_001145639                 |
| 3.18E+02 | 8.31E+00  | zinc finger protei zinc finger protei NM_153034     | NM_153034                    |
| 3.18E+02 | 8.31E+00  | zinc finger protei zinc finger protei NM_153034     | NM_153034                    |
| 2.83E+02 | 8.15E+00  | SIN3 homolog B, SIN3 homolog B, NM_015260           | NM_015260                    |
| 2.83E+02 | 8.15E+00  | SIN3 homolog B, SIN3 homolog B, NM_015260           | NM_015260                    |
| 3.64E+02 | 8.51E+00  | non-protein codi non-protein codi NR_027457         | NR_027457                    |
| 3.76E+02 | 8.56E+00  | neurofascin neurofascin NM_015090                   | NM_015090                    |
| 3.72E+02 | 8.54E+00  | hypothetical proi tumor necrosis f: NR_026927       | NR_026927                    |
| 3.37E+02 | 8.40E+00  | solute carrier fan hypothetical proi NM_001080431   | NM_001080431                 |
| 3.17E+02 | 8.31E+00  | hypothetical LOC collagen, type Xv NR_026943        | NR_026943                    |
| 3.17E+02 | 8.31E+00  | hypothetical LOC collagen, type Xv NR_026943        | NR_026943                    |
| 3.17E+02 | 8.31E+00  | hypothetical LOC collagen, type Xv NR_026943        | NR_026943                    |
| 3.88E+02 | 8.60E+00  | chromosome 9 o chromosome 9 o NM_001004353          | NM_001004353                 |
| 3.88E+02 | 8.60E+00  | chromosome 9 o cofactor of BRCA NM_001004353        | NM_001004353                 |
| 3.83E+02 | 8.58E+00  | Janus kinase and Janus kinase and NM_001105521      | NM_001105521                 |
| 2.86E+02 | 8.16E+00  | potassium chann potassium chann NM_020822           | NM_020822                    |
| 2.86E+02 | 8.16E+00  | potassium chann potassium chann NM_020822           | NM_020822                    |
| 1.41E+00 | 4.96E-01  | acetylserotonin ( acetylserotonin ( NM_004043       | NM_004043                    |
| 1.41E+00 | 4.96E-01  | acetylserotonin ( acetylserotonin ( NM_004043       | NM_004043                    |
| 4.28E+02 | 8.74E+00  | BTG3 associated BTG3 associated NM_017869,NM        | NM_017869,NM_079837          |
| 3.39E+02 | 8.41E+00  | protein tyrosine protein tyrosine NM_130842,NM      | NM_130842,NM_130843,NM_002   |
| 2.58E+02 | 8.01E+00  | sequestosome 1 sequestosome 1 NM_001142299          | NM_001142299                 |
| 3.53E+02 | 8.46E+00  | hepsin hepsin NM_002151,NM                          | NM_002151,NM_182983          |
| 1.18E+00 | 2.43E-01  | myosin IE myosin IE NM_004998                       | NM_004998                    |
| 1.18E+00 | 2.43E-01  | lactate dehydrog lactate dehydrog NM_033195         | NM_033195                    |
| 3.72E+02 | 8.54E+00  | jumonji domain ( jumonji domain ( NM_001114632,     | NM_001114632,NM_005090,NR_ ( |
| 3.72E+02 | 8.54E+00  | jumonji domain ( jumonji domain ( NM_001114632,     | NM_001114632,NM_005090,NR_ ( |
| 3.72E+02 | 8.54E+00  | jumonji domain ( jumonji domain ( NM_001114632,     | NM_001114632,NM_005090,NR_ ( |
| 1.71E+00 | 7.71E-01  | UDP-N-acetyl-alc hypothetical LOC NM_021808,NM      | NM_021808,NM_001122636       |
| 1.40E+00 | 4.83E-01  | postmeiotic segr postmeiotic segr NR_023383         | NR_023383                    |
| 1.40E+00 | 4.83E-01  | postmeiotic segr postmeiotic segr NR_023383         | NR_023383                    |
| 1.40E+00 | 4.83E-01  | postmeiotic segr postmeiotic segr NR_023383         | NR_023383                    |
| 1.98E+00 | 9.87E-01  | DDB1 and CUL4 ; DDB1 and CUL4 ; NM_138353           | NM_138353                    |
| 1.98E+00 | 9.87E-01  | DDB1 and CUL4 ; DDB1 and CUL4 ; NM_138353           | NM_138353                    |
| 1.98E+00 | 9.87E-01  | DDB1 and CUL4 ; DDB1 and CUL4 ; NM_138353           | NM_138353                    |
| 3.95E+02 | 8.63E+00  | ribosomal RNA p ribosomal RNA p NM_015056           | NM_015056                    |
| 3.95E+02 | 8.63E+00  | ribosomal RNA p ribosomal RNA p NM_015056           | NM_015056                    |
| 1.77E+00 | 8.21E-01  | protein kinase C, protein kinase C, NM_145040       | NM_145040                    |
| 8.00E-01 | -3.22E-01 | F-box and WD re F-box and WD re NM_031456           | NM_031456                    |
| 8.00E-01 | -3.22E-01 | F-box and WD re F-box and WD re NM_031456           | NM_031456                    |
| 8.53E-01 | -2.30E-01 | ADP-ribosylhydr ADP-ribosylhydr NM_138430           | NM_138430                    |
| 8.53E-01 | -2.30E-01 | ADP-ribosylhydr ADP-ribosylhydr NM_138430           | NM_138430                    |
| 1.59E+00 | 6.73E-01  | suppressor of cyt cerebellin 2 prec NM_004232       | NM_004232                    |
| 3.01E+02 | 8.23E+00  | glutamate-rich 1 discs, large (Dros NM_207332       | NM_207332                    |
| 3.01E+02 | 8.23E+00  | glutamate-rich 1 discs, large (Dros NM_207332       | NM_207332                    |

|          |           |                                       |                                           |              |
|----------|-----------|---------------------------------------|-------------------------------------------|--------------|
| 3.13E+02 | 8.29E+00  | spectrin, beta, er spectrin, beta, er | NM_000347                                 | NM_000347    |
| 3.13E+02 | 8.29E+00  | spectrin, beta, er spectrin, beta, er | NM_000347                                 | NM_000347    |
| 2.63E+02 | 8.04E+00  | regulatory associ regulatory associ   | NM_020761                                 | NM_020761    |
| 2.63E+02 | 8.04E+00  | regulatory associ regulatory associ   | NM_020761                                 | NM_020761    |
| 4.90E+02 | 8.94E+00  | protein kinase, c, protein kinase, c, | NM_002735                                 | NM_002735    |
| 4.90E+02 | 8.94E+00  | protein kinase, c, protein kinase, c, | NM_002735                                 | NM_002735    |
| 4.90E+02 | 8.94E+00  | protein kinase, c, protein kinase, c, | NM_002735                                 | NM_002735    |
| 2.57E+02 | 8.00E+00  | protein tyrosine protein tyrosine     | NM_130853,NM_130853,NM_130854,NM_002      |              |
| 2.86E+02 | 8.16E+00  | paralemmi chromosome 19               | NM_001040134, NM_001040134,NM_002579      |              |
| 3.86E-03 | -8.02E+00 | kelch-like 38 (Drc annexin A13        | NM_001081675                              | NM_001081675 |
| 3.08E-03 | -8.34E+00 | hexokinase 3 (w/ ubiquitin interaci   | NM_002115                                 | NM_002115    |
| 1.73E+00 | 7.92E-01  | brain-specific an activity-regulater  | NM_001702                                 | NM_001702    |
| 1.73E+00 | 7.92E-01  | brain-specific an activity-regulater  | NM_001702                                 | NM_001702    |
| 3.31E+02 | 8.37E+00  | SHC (Src homolo SHC (Src homolo       | NM_012435                                 | NM_012435    |
| 3.31E+02 | 8.37E+00  | SHC (Src homolo SHC (Src homolo       | NM_012435                                 | NM_012435    |
| 3.30E+02 | 8.37E+00  | acidic repeat con acidic repeat con   | NM_052957                                 | NM_052957    |
| 2.61E+02 | 8.03E+00  | hypothetical LOC hypothetical LOC     | NR_027242                                 | NR_027242    |
| 2.61E+02 | 8.03E+00  | hypothetical LOC hypothetical LOC     | NR_027242                                 | NR_027242    |
| 3.65E+02 | 8.51E+00  | regulatory associ regulatory associ   | NM_020761                                 | NM_020761    |
| 1.33E+00 | 4.11E-01  | CTD (carboxy-ter potassium voltag     | NM_048368,NM_048368,NM_004715             |              |
| 1.33E+00 | 4.11E-01  | CTD (carboxy-ter potassium voltag     | NM_048368,NM_048368,NM_004715             |              |
| 3.78E+02 | 8.56E+00  | formin homology formin homology       | NM_025135                                 | NM_025135    |
| 1.32E+00 | 3.96E-01  | cytochrome b-5f angiotensin I con     | NM_001017917, NM_001017917,NM_001017916,N |              |
| 1.32E+00 | 3.96E-01  | cytochrome b-5f angiotensin I con     | NM_001017917, NM_001017917,NM_001017916,N |              |
| 2.97E+02 | 8.22E+00  | paired-like home H2A histone fam      | NM_002653                                 | NM_002653    |
| 2.97E+02 | 8.22E+00  | paired-like home H2A histone fam      | NM_002653                                 | NM_002653    |
| 2.80E+02 | 8.13E+00  | solute carrier fan solute carrier fan | NM_207348                                 | NM_207348    |
| 2.61E+02 | 8.03E+00  | C1q and tumor n calcium channel,      | NM_207419                                 | NM_207419    |
| 2.61E+02 | 8.03E+00  | C1q and tumor n calcium channel,      | NM_207419                                 | NM_207419    |
| 2.82E+02 | 8.14E+00  | chromosome 10 enoyl CoA hydrat        | NM_001098483                              | NM_001098483 |
| 2.82E+02 | 8.14E+00  | chromosome 10 enoyl CoA hydrat        | NM_001098483                              | NM_001098483 |
| 4.76E+02 | 8.90E+00  | solute carrier fan solute carrier fan | NM_003562                                 | NM_003562    |
| 3.85E-03 | -8.02E+00 | v-akt murine thyl chromosome 19       | NM_001626                                 | NM_001626    |
| 3.85E-03 | -8.02E+00 | v-akt murine thyl chromosome 19       | NM_001626                                 | NM_001626    |
| 3.09E+02 | 8.27E+00  | human immunoc guanylate cyclase       | NM_024503,NM_024503,NM_001127714          |              |
| 3.09E+02 | 8.27E+00  | human immunoc guanylate cyclase       | NM_024503,NM_024503,NM_001127714          |              |
| 3.89E+02 | 8.60E+00  | polynucleotide ki polynucleotide k    | NM_007254                                 | NM_007254    |
| 3.25E+02 | 8.34E+00  | sodium channel, sodium channel,       | NM_001037,NM_001037,NM_199037             |              |
| 3.72E-03 | -8.07E+00 | KIAA0087 chromosome 7 o               | NR_022006                                 | NR_022006    |
| 1.32E+00 | 4.02E-01  | aquaporin 7 pse family with sequ      | NR_002823                                 | NR_002823    |
| 1.32E+00 | 4.02E-01  | aquaporin 7 pse family with sequ      | NR_002823                                 | NR_002823    |
| 3.96E+02 | 8.63E+00  | protein phosphai protein phosphai     | NM_013239,NM_013239,NM_199326             |              |
| 3.96E+02 | 8.63E+00  | protein phosphai protein phosphai     | NM_013239,NM_013239,NM_199326             |              |
| 1.78E+00 | 8.33E-01  | heat shock 70kD: KIAA1598             | NM_025015                                 | NM_025015    |
| 3.78E+02 | 8.56E+00  | mucin 20, cell su mucin 20, cell su   | NM_152673                                 | NM_152673    |
| 3.03E+02 | 8.24E+00  | KIAA0664 KIAA0664                     | NM_015229                                 | NM_015229    |
| 3.22E-03 | -8.28E+00 | polymerase (DN/ polymerase (DN/       | NM_017443,NR_017443,NR_027261             |              |
| 2.98E+02 | 8.22E+00  | spectrin, beta, nc spectrin, beta, nc | NM_006946                                 | NM_006946    |
| 2.98E+02 | 8.22E+00  | spectrin, beta, nc spectrin, beta, nc | NM_006946                                 | NM_006946    |
| 3.40E+02 | 8.41E+00  | cholinergic recep cholinergic recep   | NM_000744                                 | NM_000744    |
| 3.78E+02 | 8.56E+00  | mucin 6, oligome mucin 6, oligome     | NM_005961                                 | NM_005961    |
| 3.78E+02 | 8.56E+00  | mucin 6, oligome mucin 6, oligome     | NM_005961                                 | NM_005961    |
| 2.08E+00 | 1.06E+00  | C-type lectin don C-type lectin don   | NM_015226                                 | NM_015226    |
| 2.76E+02 | 8.11E+00  | pantothenate kir pantothenate kir     | NM_018216                                 | NM_018216    |
| 2.76E+02 | 8.11E+00  | pantothenate kir pantothenate kir     | NM_018216                                 | NM_018216    |
| 3.32E+02 | 8.38E+00  | unc-93 homolog unc-93 homolog         | NM_030930                                 | NM_030930    |
| 3.32E+02 | 8.38E+00  | unc-93 homolog unc-93 homolog         | NM_030930                                 | NM_030930    |
| 3.27E+02 | 8.35E+00  | chromosome 7 o chromosome 7 o         | NM_001134395, NM_001134395,NM_001134396,N |              |

|          |           |                                                       |                                             |
|----------|-----------|-------------------------------------------------------|---------------------------------------------|
| 3.27E+02 | 8.35E+00  | chromosome 7 o chromosome 7 o                         | NM_001134395, NM_001134395, NM_001134396, N |
| 3.03E+02 | 8.24E+00  | BTB (POZ) domain BTB (POZ) domain                     | NM_032444 NM_032444                         |
| 3.03E+02 | 8.24E+00  | BTB (POZ) domain BTB (POZ) domain                     | NM_032444 NM_032444                         |
| 1.19E+00 | 2.50E-01  | grainyhead-like 1 Kruppel-like factor                 | NM_198182 NM_198182                         |
| 1.19E+00 | 2.50E-01  | grainyhead-like 1 Kruppel-like factor                 | NM_198182 NM_198182                         |
| 2.76E+02 | 8.11E+00  | protein phosphatase protein phosphatase               | NM_014678 NM_014678                         |
| 2.76E+02 | 8.11E+00  | protein phosphatase protein phosphatase               | NM_014678 NM_014678                         |
| 1.85E+00 | 8.85E-01  | tectorin alpha tectorin alpha                         | NM_005422 NM_005422                         |
| 1.85E+00 | 8.85E-01  | tectorin alpha tectorin alpha                         | NM_005422 NM_005422                         |
| 3.53E+02 | 8.46E+00  | regulatory associated regulatory associated           | NM_020761 NM_020761                         |
| 3.53E+02 | 8.46E+00  | regulatory associated regulatory associated           | NM_020761 NM_020761                         |
| 3.84E+02 | 8.59E+00  | protein arginase protein arginase                     | NM_198318, NM_198318, NM_198319, NM_001     |
| 1.99E+00 | 9.89E-01  | MCF.2 cell line derived MCF.2 cell line derived       | NM_024979 NM_024979                         |
| 1.99E+00 | 9.89E-01  | MCF.2 cell line derived MCF.2 cell line derived       | NM_024979 NM_024979                         |
| 1.99E+00 | 9.89E-01  | MCF.2 cell line derived MCF.2 cell line derived       | NM_024979 NM_024979                         |
| 3.23E+02 | 8.34E+00  | PHD finger protein cAMP responsive                    | NM_001101802, NM_001101802, NM_016621       |
| 2.63E+02 | 8.04E+00  | mitochondrial ribosomal hypothetical LOC              | NM_021134 NM_021134                         |
| 3.23E+02 | 8.34E+00  | family with sequence protein phosphatase              | NM_001001794 NM_001001794                   |
| 2.73E+02 | 8.09E+00  | transmembrane KIAA0125                                | NM_025268 NM_025268                         |
| 4.03E+02 | 8.65E+00  | SHC (Src homologous SHC (Src homologous               | NM_012435 NM_012435                         |
| 4.03E+02 | 8.65E+00  | SHC (Src homologous SHC (Src homologous               | NM_012435 NM_012435                         |
| 4.07E+02 | 8.67E+00  | Enah/Vasp-like Enah/Vasp-like                         | NM_016337 NM_016337                         |
| 2.58E-03 | -8.60E+00 | leucine-rich repeat leucine-rich repeat               | NM_020678 NM_020678                         |
| 2.58E-03 | -8.60E+00 | leucine-rich repeat leucine-rich repeat               | NM_020678 NM_020678                         |
| 1.93E+00 | 9.52E-01  | nucleolar component tubulin, alpha 3d                 | NR_002826 NR_002826                         |
| 1.93E+00 | 9.52E-01  | nucleolar component tubulin, alpha 3d                 | NR_002826 NR_002826                         |
| 1.93E+00 | 9.52E-01  | tubulin, alpha 3d tubulin, alpha 3d                   | NM_080386 NM_080386                         |
| 2.58E+02 | 8.01E+00  | frizzled homolog piwi-like 1 (Drosophila)             | NM_007197 NM_007197                         |
| 2.58E+02 | 8.01E+00  | frizzled homolog piwi-like 1 (Drosophila)             | NM_007197 NM_007197                         |
| 3.05E+02 | 8.25E+00  | strawberry notch serine/threonine                     | NM_001100122, NM_001100122, NM_014963       |
| 1.69E+00 | 7.61E-01  | TBC1 domain family with sequence                      | NM_014346 NM_014346                         |
| 1.98E+00 | 9.87E-01  | RAB35, member RAB35, member                           | NM_006861 NM_006861                         |
| 4.30E-03 | -7.86E+00 | IKAROS family zinc finger zona pellucida binding      | NM_183231, NM_183231, NM_183232, NM_012     |
| 4.30E-03 | -7.86E+00 | IKAROS family zinc finger zona pellucida binding      | NM_183231, NM_183231, NM_183232, NM_012     |
| 3.99E+02 | 8.64E+00  | nuclear factor of nuclear factor of                   | NM_172387, NM_172387, NM_172389             |
| 2.70E-03 | -8.53E+00 | cytospin B cytospin B                                 | NM_152904, NM_152904, NM_001033553          |
| 2.70E-03 | -8.53E+00 | cytospin B cytospin B                                 | NM_152904, NM_152904, NM_001033553          |
| 8.55E-01 | -2.26E-01 | hypothetical LOC zinc finger protein                  | NR_015417 NR_015417                         |
| 8.55E-01 | -2.26E-01 | hypothetical LOC zinc finger protein                  | NR_015417 NR_015417                         |
| 2.88E+02 | 8.17E+00  | solute carrier family solute carrier family           | NM_031947 NM_031947                         |
| 2.88E+02 | 8.17E+00  | solute carrier family solute carrier family           | NM_031947 NM_031947                         |
| 3.21E+02 | 8.33E+00  | prostate tumor c prostate tumor c                     | NM_017432 NM_017432                         |
| 3.41E+02 | 8.41E+00  | solute carrier family DnaJ (Hsp40) homolog            | NM_003459 NM_003459                         |
| 3.41E+02 | 8.41E+00  | DnaJ (Hsp40) homolog DnaJ (Hsp40) homolog             | NM_173650 NM_173650                         |
| 1.70E+00 | 7.62E-01  | asparagine-linked transient receptor                  | NR_024248 NR_024248                         |
| 1.83E+00 | 8.68E-01  | kelch-like 30 (Drosophila) kelch-like 30 (Drosophila) | NM_198582 NM_198582                         |
| 2.93E+02 | 8.19E+00  | chondroitin sulfate chondroitin sulfate               | NR_001554, NR_001554, NR_002194             |
| 2.93E+02 | 8.19E+00  | chondroitin sulfate golgin A2 pseudorepeat            | NR_001554, NR_001554, NR_002194             |
| 2.93E+02 | 8.19E+00  | chondroitin sulfate golgin A2 pseudorepeat            | NR_001554, NR_001554, NR_002194             |
| 3.11E+02 | 8.28E+00  | WD repeat domain WD repeat domain                     | NM_032259 NM_032259                         |
| 1.77E+00 | 8.26E-01  | Rho-related BTB Rho-related BTB                       | NM_015178 NM_015178                         |
| 1.77E+00 | 8.26E-01  | Rho-related BTB Rho-related BTB                       | NM_015178 NM_015178                         |
| 3.91E-03 | -8.00E+00 | inositol 1,4,5-trisphosphate synaptotagmin X          | NM_001034841 NM_001034841                   |
| 3.91E-03 | -8.00E+00 | inositol 1,4,5-trisphosphate synaptotagmin X          | NM_001034841 NM_001034841                   |
| 3.96E+02 | 8.63E+00  | hypothetical LOC fibrosin-like 1                      | NR_024563 NR_024563                         |
| 3.96E+02 | 8.63E+00  | hypothetical LOC fibrosin-like 1                      | NR_024563 NR_024563                         |
| 1.18E+00 | 2.35E-01  | cysteinyl-tRNA synthetase cysteinyl-tRNA synthetase   | NM_024537 NM_024537                         |
| 1.18E+00 | 2.35E-01  | cysteinyl-tRNA synthetase cysteinyl-tRNA synthetase   | NM_024537 NM_024537                         |

|          |           |                     |                    |                                                               |                                                               |
|----------|-----------|---------------------|--------------------|---------------------------------------------------------------|---------------------------------------------------------------|
| 1.18E+00 | 2.35E-01  | cysteinyl-tRNA sy   | cysteinyl-tRNA sy  | NM_024537                                                     | NM_024537                                                     |
| 2.51E+02 | 7.97E+00  | SET and MYND d      | transcription faci | NM_022743                                                     | NM_022743                                                     |
| 2.61E+02 | 8.03E+00  | GLI family zinc fir | zinc finger protei | NM_138465                                                     | NM_138465                                                     |
| 3.40E+02 | 8.41E+00  | potassium voltag    | potassium voltag   | NM_172109                                                     | NM_172109                                                     |
| 3.40E+02 | 8.41E+00  | potassium voltag    | potassium voltag   | NM_172109                                                     | NM_172109                                                     |
| 2.11E+00 | 1.08E+00  | DENN/MADD do        | DENN/MADD do       | NM_014856                                                     | NM_014856                                                     |
| 3.01E+02 | 8.23E+00  | gametogenetin       | gametogenetin      | NM_152657                                                     | NM_152657                                                     |
| 4.08E+02 | 8.67E+00  | carbohydrate (ke    | carbohydrate (ke   | NM_003654                                                     | NM_003654                                                     |
| 4.08E+02 | 8.67E+00  | carbohydrate (ke    | carbohydrate (ke   | NM_003654                                                     | NM_003654                                                     |
| 4.08E+02 | 8.67E+00  | carbohydrate (ke    | carbohydrate (ke   | NM_003654                                                     | NM_003654                                                     |
| 4.08E+02 | 8.67E+00  | carbohydrate (ke    | carbohydrate (ke   | NM_003654                                                     | NM_003654                                                     |
| 1.34E+00 | 4.25E-01  | suppressor of ze    | leucine rich repe  | NM_015355                                                     | NM_015355                                                     |
| 1.34E+00 | 4.25E-01  | suppressor of ze    | leucine rich repe  | NM_015355                                                     | NM_015355                                                     |
| 1.34E+00 | 4.25E-01  | leucine rich repe   | leucine rich repe  | NM_052888                                                     | NM_052888                                                     |
| 2.50E+02 | 7.96E+00  | solute carrier fan  | divergent-paired   | NR_002938                                                     | NR_002938                                                     |
| 3.70E+02 | 8.53E+00  | chromosome 17       | chromosome 17      | NM_001145536                                                  | NM_001145536                                                  |
| 1.44E+00 | 5.28E-01  | rhomboid, veinle    | rhomboid, veinle   | NM_003961                                                     | NM_003961                                                     |
| 3.28E+02 | 8.36E+00  | copine VII          | copine VII         | NM_014427,NM_153636                                           | NM_014427,NM_153636                                           |
| 3.28E+02 | 8.36E+00  | copine VII          | copine VII         | NM_014427,NM_153636                                           | NM_014427,NM_153636                                           |
| 4.24E-03 | -7.88E+00 | complement con      | disabled homolo    | NM_001737                                                     | NM_001737                                                     |
| 2.19E+00 | 1.13E+00  | fibroblast growt    | ring finger protei | NM_021923                                                     | NM_021923                                                     |
| 3.75E+02 | 8.55E+00  | cytochrome P45      | cytochrome P45     | NM_000106,NM_001025161                                        | NM_000106,NM_001025161                                        |
| 3.75E+02 | 8.55E+00  | cytochrome P45      | cytochrome P45     | NM_000106,NM_001025161                                        | NM_000106,NM_001025161                                        |
| 3.75E+02 | 8.55E+00  | cytochrome P45      | cytochrome P45     | NM_000106,NM_001025161                                        | NM_000106,NM_001025161                                        |
| 3.94E+02 | 8.62E+00  | tuberous sclerosi   | tuberous sclerosi  | NM_000548,NM_001077183,NM_001077183,NM_001077183,NM_001077183 | NM_000548,NM_001077183,NM_001077183,NM_001077183,NM_001077183 |
| 3.94E+02 | 8.62E+00  | tuberous sclerosi   | tuberous sclerosi  | NM_000548,NM_001077183,NM_001077183,NM_001077183,NM_001077183 | NM_000548,NM_001077183,NM_001077183,NM_001077183,NM_001077183 |
| 3.94E+02 | 8.62E+00  | tuberous sclerosi   | tuberous sclerosi  | NM_000548,NM_001077183,NM_001077183,NM_001077183,NM_001077183 | NM_000548,NM_001077183,NM_001077183,NM_001077183,NM_001077183 |
| 1.55E+00 | 6.33E-01  | BTG3 associated     | BTG3 associated    | NM_017869,NM_079837                                           | NM_017869,NM_079837                                           |
| 3.87E+02 | 8.59E+00  | glutamate-rich 1    | discs, large (Dros | NM_207332                                                     | NM_207332                                                     |
| 4.08E+02 | 8.67E+00  | ankyrin repeat d    | ankyrin repeat d   | NM_013275                                                     | NM_013275                                                     |
| 2.09E+00 | 1.06E+00  | tenascin XB         | tenascin XB        | NM_019105,NM_032470                                           | NM_019105,NM_032470                                           |
| 4.35E-03 | -7.85E+00 | neuroblastoma b     | neuroblastoma b    | NM_001143987,NM_001143987,NM_001143987                        | NM_001143987,NM_001143987,NM_001143987                        |
| 1.27E+00 | 3.43E-01  | sialidase 2 (cyto   | inositol polyphos  | NM_005383                                                     | NM_005383                                                     |
| 3.93E+02 | 8.62E+00  | keratin 17          | eukaryotic transl  | NM_000422                                                     | NM_000422                                                     |
| 1.20E+00 | 2.67E-01  | stress-induced-pl   | fermitin family r  | NM_006819                                                     | NM_006819                                                     |
| 1.20E+00 | 2.67E-01  | stress-induced-pl   | fermitin family r  | NM_006819                                                     | NM_006819                                                     |
| 2.92E+02 | 8.19E+00  | microtubule assc    | microtubule assc   | NM_001033602                                                  | NM_001033602                                                  |
| 2.53E+02 | 7.98E+00  | transforming gro    | transforming gro   | NM_015927                                                     | NM_015927                                                     |
| 2.53E+02 | 7.98E+00  | transforming gro    | transforming gro   | NM_015927                                                     | NM_015927                                                     |
| 2.28E+00 | 1.19E+00  | PHD and ring fin    | PHD and ring fin   | NM_020901                                                     | NM_020901                                                     |
| 2.28E+00 | 1.19E+00  | PHD and ring fin    | PHD and ring fin   | NM_020901                                                     | NM_020901                                                     |
| 1.19E+00 | 2.57E-01  | coiled-coil doma    | coiled-coil doma   | NM_182568                                                     | NM_182568                                                     |
| 1.19E+00 | 2.57E-01  | coiled-coil doma    | coiled-coil doma   | NM_182568                                                     | NM_182568                                                     |
| 3.14E+02 | 8.30E+00  | mesothelin-like     | mesothelin-like    | NM_001025190                                                  | NM_001025190                                                  |
| 2.74E+02 | 8.10E+00  | mucin 5AC, oligo    | mucin 5AC, oligo   | NM_017511                                                     | NM_017511                                                     |
| 2.74E+02 | 8.10E+00  | mucin 5AC, oligo    | mucin 5AC, oligo   | NM_017511                                                     | NM_017511                                                     |
| 3.33E+02 | 8.38E+00  | ankyrin repeat d    | ankyrin repeat d   | NM_013275                                                     | NM_013275                                                     |
| 1.20E+00 | 2.62E-01  | WD repeat dom       | WD repeat dom      | NM_145294                                                     | NM_145294                                                     |
| 1.20E+00 | 2.62E-01  | WD repeat dom       | WD repeat dom      | NM_145294                                                     | NM_145294                                                     |
| 2.43E+02 | 7.93E+00  | MAD1 mitotic ar     | MAD1 mitotic ar    | NM_003550,NM_001013837,NM_001013837,NM_001013837,NM_001013837 | NM_003550,NM_001013837,NM_001013837,NM_001013837,NM_001013837 |
| 2.43E+02 | 7.93E+00  | MAD1 mitotic ar     | MAD1 mitotic ar    | NM_003550,NM_001013837,NM_001013837,NM_001013837,NM_001013837 | NM_003550,NM_001013837,NM_001013837,NM_001013837,NM_001013837 |
| 3.99E+02 | 8.64E+00  | interferon regula   | interferon regula  | NM_001571                                                     | NM_001571                                                     |
| 3.99E+02 | 8.64E+00  | interferon regula   | interferon regula  | NM_001571                                                     | NM_001571                                                     |
| 3.60E-03 | -8.12E+00 | chromosome 16       | chromosome 16      | NM_001012991                                                  | NM_001012991                                                  |
| 1.15E+00 | 1.99E-01  | family with sequ    | KIAA0182           | NM_198491                                                     | NM_198491                                                     |
| 3.95E+02 | 8.63E+00  | ephrin-B2           | ephrin-B2          | NM_004093                                                     | NM_004093                                                     |
| 3.95E+02 | 8.63E+00  | ephrin-B2           | ephrin-B2          | NM_004093                                                     | NM_004093                                                     |
| 2.50E+02 | 7.97E+00  | bol, boule-like (D  | phospholipase C-   | NM_033030,NM_197970                                           | NM_033030,NM_197970                                           |

|          |           |                                         |                                             |
|----------|-----------|-----------------------------------------|---------------------------------------------|
| 3.13E+02 | 8.29E+00  | dysferlin, limb gii dysferlin, limb gii | NM_001130984, NM_001130984, NM_001130982, N |
| 1.91E+00 | 9.36E-01  | kinesin family mε kinesin family mε     | NM_020816, NM_020816, NM_001122819          |
| 3.82E+02 | 8.58E+00  | lysine (K)-specific lysine (K)-specific | NM_001005366, NM_001005366, NM_032590       |
| 3.82E+02 | 8.58E+00  | lysine (K)-specific lysine (K)-specific | NM_001005366, NM_001005366, NM_032590       |
| 3.08E+02 | 8.27E+00  | wingless-type MI wingless-type MI       | NM_030761 NM_030761                         |
| 3.08E+02 | 8.27E+00  | wingless-type MI wingless-type MI       | NM_030761 NM_030761                         |
| 3.12E+02 | 8.29E+00  | Janus kinase 2 Janus kinase 2           | NM_004972 NM_004972                         |
| 3.83E+02 | 8.58E+00  | claudin 15 claudin 15                   | NM_014343 NM_014343                         |
| 1.52E+00 | 6.01E-01  | hypothetical proi tumor necrosis f:     | NR_026927 NR_026927                         |
| 1.64E+00 | 7.17E-01  | galanin receptor sal-like 3 (Drosoç     | NM_001480 NM_001480                         |
| 2.50E+02 | 7.96E+00  | major histocomp major histocomp         | NR_003937 NR_003937                         |
| 2.50E+02 | 7.96E+00  | major histocomp major histocomp         | NR_003937 NR_003937                         |
| 1.96E+00 | 9.68E-01  | zinc finger RNA b zinc finger RNA b     | NM_015174 NM_015174                         |
| 1.96E+00 | 9.68E-01  | zinc finger RNA b zinc finger RNA b     | NM_015174 NM_015174                         |
| 3.41E+02 | 8.41E+00  | notch 1 notch 1                         | NM_017617 NM_017617                         |
| 1.22E+00 | 2.88E-01  | cyclin N-terminal cyclin N-terminal     | NM_173478 NM_173478                         |
| 3.96E+02 | 8.63E+00  | RAB11 family int RAB11 family int       | NM_014700 NM_014700                         |
| 3.96E+02 | 8.63E+00  | RAB11 family int RAB11 family int       | NM_014700 NM_014700                         |
| 3.96E+02 | 8.63E+00  | RAB11 family int RAB11 family int       | NM_001142272 NM_001142272                   |
| 3.63E+02 | 8.51E+00  | protein kinase, c protein kinase, c     | NM_002735 NM_002735                         |
| 3.63E+02 | 8.51E+00  | protein kinase, c protein kinase, c     | NM_002735 NM_002735                         |
| 3.63E+02 | 8.51E+00  | protein kinase, c protein kinase, c     | NM_002735 NM_002735                         |
| 2.53E+02 | 7.98E+00  | chromosome 2 o hypothetical LOC         | NM_173821 NM_173821                         |
| 3.70E+02 | 8.53E+00  | chromosome 21 heat shock transi         | NR_026863 NR_026863                         |
| 4.00E+02 | 8.64E+00  | SET binding factc SET binding factc     | NM_002972 NM_002972                         |
| 4.00E+02 | 8.64E+00  | SET binding factc SET binding factc     | NM_002972 NM_002972                         |
| 1.47E+00 | 5.56E-01  | thrombospondin thrombospondin           | NM_003247 NM_003247                         |
| 1.95E+00 | 9.61E-01  | UV radiation resi wingless-type MI      | NM_003369 NM_003369                         |
| 1.95E+00 | 9.61E-01  | UV radiation resi wingless-type MI      | NM_003369 NM_003369                         |
| 2.38E+00 | 1.25E+00  | filamin C, gammε filamin C, gammε       | NM_001127487, NM_001127487, NM_001458       |
| 3.15E+02 | 8.30E+00  | vasoactive intest vasoactive intest     | NM_003382 NM_003382                         |
| 3.15E+02 | 8.30E+00  | vasoactive intest vasoactive intest     | NM_003382 NM_003382                         |
| 1.35E+00 | 4.34E-01  | proline rich 20C proline rich 20A       | NM_001130405, NM_001130405, NM_001130404, N |
| 1.35E+00 | 4.34E-01  | proline rich 20C proline rich 20A       | NM_001130405, NM_001130405, NM_001130404, N |
| 1.35E+00 | 4.34E-01  | proline rich 20C proline rich 20A       | NM_001130405, NM_001130405, NM_001130404, N |
| 1.35E+00 | 4.34E-01  | proline rich 20A proline rich 20A       | NM_198441, NM_198441, NM_001130404, NM_     |
| 3.08E+02 | 8.27E+00  | keratin 34 keratin 31                   | NM_021013 NM_021013                         |
| 2.63E+02 | 8.04E+00  | PR domain conta PR domain conta         | NM_022115 NM_022115                         |
| 1.78E+00 | 8.34E-01  | chromosome 19 polypyrimidine ti         | NM_173481 NM_173481                         |
| 2.66E+02 | 8.06E+00  | nuclear factor I/) nuclear factor I/)   | NM_002501 NM_002501                         |
| 1.36E+00 | 4.41E-01  | chymotrypsinoge chymotrypsinoge         | NM_001025200 NM_001025200                   |
| 1.36E+00 | 4.41E-01  | chymotrypsinoge chymotrypsinoge         | NM_001025200 NM_001025200                   |
| 3.09E+02 | 8.27E+00  | phosphatidylinos phosphatidylinos       | NM_012398 NM_012398                         |
| 3.09E+02 | 8.27E+00  | phosphatidylinos phosphatidylinos       | NM_012398 NM_012398                         |
| 3.58E+02 | 8.48E+00  | guanine nucleoti guanine nucleoti       | NM_002067 NM_002067                         |
| 3.58E+02 | 8.48E+00  | guanine nucleoti guanine nucleoti       | NM_002067 NM_002067                         |
| 3.87E+02 | 8.60E+00  | GRB2-associated cat eye syndrom         | NM_001037814 NM_001037814                   |
| 1.19E+00 | 2.53E-01  | v-maf musculoaç v-maf musculoaç         | NM_032711, NM_032711, NM_002359             |
| 3.19E+02 | 8.32E+00  | SH3-domain GRB SH3-domain GRB           | NM_003025 NM_003025                         |
| 1.32E+00 | 4.02E-01  | RAS p21 protein RAS p21 protein         | NM_007368 NM_007368                         |
| 1.32E+00 | 4.02E-01  | RAS p21 protein RAS p21 protein         | NM_007368 NM_007368                         |
| 3.44E+02 | 8.43E+00  | keratin 86 keratin 86                   | NM_002284 NM_002284                         |
| 2.63E+02 | 8.04E+00  | collectin sub-farr collectin sub-farr   | NM_199235, NM_199235, NM_024027             |
| 4.73E+02 | 8.89E+00  | caveolin 3 caveolin 3                   | NM_001234, NM_001234, NM_033337             |
| 4.30E-03 | -7.86E+00 | proteasome (pro proteasome (pro         | NM_176863, NM_176863, NM_005789             |
| 4.15E+02 | 8.70E+00  | ATPase, class VI, ATPase, class VI,     | NM_032189, NM_032189, NM_015205             |
| 4.15E+02 | 8.70E+00  | ATPase, class VI, ATPase, class VI,     | NM_032189, NM_032189, NM_015205             |
| 1.46E+00 | 5.47E-01  | nuclear factor of cysteine/histidin     | NM_013432 NM_013432                         |

|          |           |                    |                     |               |                             |
|----------|-----------|--------------------|---------------------|---------------|-----------------------------|
| 1.46E+00 | 5.47E-01  | cysteine/histidin  | cysteine/histidin   | NM_138496     | NM_138496                   |
| 3.52E+02 | 8.46E+00  | WD repeat doma     | WD repeat doma      | NM_017491,NM  | NM_017491,NM_005112         |
| 3.52E+02 | 8.46E+00  | WD repeat doma     | WD repeat doma      | NM_017491,NM  | NM_017491,NM_005112         |
| 3.86E+02 | 8.59E+00  | active BCR-relate  | active BCR-relate   | NM_001159746  | NM_001159746                |
| 2.80E+02 | 8.13E+00  | galanin receptor   | sal-like 3 (Droso   | NM_001480     | NM_001480                   |
| 1.10E+00 | 1.35E-01  | O-linked N-acety   | acidic repeat con   | NM_181673,NM  | NM_181673,NM_181672         |
| 3.61E-03 | -8.11E+00 | WNT1 inducible     | : potassium chann   | NM_003881     | NM_003881                   |
| 3.61E-03 | -8.11E+00 | WNT1 inducible     | : potassium chann   | NM_003881     | NM_003881                   |
| 3.10E+02 | 8.27E+00  | family with sequ   | KIAA0182            | NM_198491     | NM_198491                   |
| 3.10E+02 | 8.27E+00  | family with sequ   | KIAA0182            | NM_198491     | NM_198491                   |
| 3.79E-03 | -8.05E+00 | hypothetical LOC   | odz, odd Oz/ten-    | NR_027107     | NR_027107                   |
| 3.44E+02 | 8.43E+00  | macrophage eryt    | macrophage eryt     | NM_005882,NM  | NM_005882,NM_001017405      |
| 2.00E+00 | 1.00E+00  | stonin 1           | general transcrip   | NM_006873     | NM_006873                   |
| 2.00E+00 | 1.00E+00  | stonin 1           | general transcrip   | NM_006873     | NM_006873                   |
| 2.00E+00 | 1.00E+00  | general transcrip  | general transcrip   | NM_006872,NM  | NM_006872,NM_172196         |
| 1.35E+00 | 4.30E-01  | pleckstrin homol   | pleckstrin homol    | NM_052909     | NM_052909                   |
| 1.35E+00 | 4.30E-01  | pleckstrin homol   | pleckstrin homol    | NM_052909     | NM_052909                   |
| 2.94E+02 | 8.20E+00  | glutamic-pyruvat   | glutamic-pyruvat    | NM_005309     | NM_005309                   |
| 1.66E+00 | 7.30E-01  | calcitonin-relate  | calcitonin-relate   | NM_001741,NM  | NM_001741,NM_001033952      |
| 1.66E+00 | 7.30E-01  | calcitonin-relate  | calcitonin-relate   | NM_001741,NM  | NM_001741,NM_001033952      |
| 4.86E+02 | 8.93E+00  | family with sequ   | family with sequ    | NM_033387     | NM_033387                   |
| 4.86E+02 | 8.93E+00  | family with sequ   | family with sequ    | NM_033387     | NM_033387                   |
| 1.83E+00 | 8.72E-01  | 1-acylglycerol-3-  | 1-acylglycerol-3-   | NM_020132     | NM_020132                   |
| 1.83E+00 | 8.72E-01  | 1-acylglycerol-3-  | 1-acylglycerol-3-   | NM_020132     | NM_020132                   |
| 2.85E+02 | 8.16E+00  | matrix metallope   | matrix metallope    | NM_016155     | NM_016155                   |
| 2.85E+02 | 8.16E+00  | matrix metallope   | matrix metallope    | NM_016155     | NM_016155                   |
| 1.95E+00 | 9.66E-01  | solute carrier fan | family with sequ    | NM_001142600, | NM_001142600,NM_052934,NM_  |
| 2.99E+02 | 8.22E+00  | coiled-coil doma   | coiled-coil doma    | NM_001114938  | NM_001114938                |
| 2.99E+02 | 8.22E+00  | coiled-coil doma   | coiled-coil doma    | NM_001114938  | NM_001114938                |
| 3.10E+02 | 8.28E+00  | hypothetical LOC   | calcium channel,    | NR_024341     | NR_024341                   |
| 3.85E+02 | 8.59E+00  | ST8 alpha-N-acet   | ST8 alpha-N-acet    | NM_013305     | NM_013305                   |
| 3.61E+02 | 8.50E+00  | potassium chann    | potassium chann     | NM_020822     | NM_020822                   |
| 3.61E+02 | 8.50E+00  | potassium chann    | potassium chann     | NM_020822     | NM_020822                   |
| 1.14E+00 | 1.90E-01  | GNAS complex lc    | GNAS complex lc     | NM_001077488  | NM_001077488                |
| 3.97E+02 | 8.63E+00  | hypothetical LOC   | hypothetical pro    | NR_024101     | NR_024101                   |
| 2.67E+02 | 8.06E+00  | DDB1 and CUL4      | : ubiquitin associa | NM_015397     | NM_015397                   |
| 2.67E+02 | 8.06E+00  | DDB1 and CUL4      | : ubiquitin associa | NM_015397     | NM_015397                   |
| 3.25E+02 | 8.34E+00  | malonyl-CoA dec    | oxidative stress i  | NM_012213     | NM_012213                   |
| 1.58E+00 | 6.56E-01  | spire homolog 2    | spire homolog 2     | NM_032451     | NM_032451                   |
| 1.58E+00 | 6.56E-01  | spire homolog 2    | spire homolog 2     | NM_032451     | NM_032451                   |
| 1.25E+00 | 3.18E-01  | eukaryotic transl  | pancreatic proge    | NM_001958     | NM_001958                   |
| 1.25E+00 | 3.18E-01  | eukaryotic transl  | pancreatic proge    | NM_001958     | NM_001958                   |
| 3.84E+02 | 8.59E+00  | chromosome 19      | chromosome 19       | NM_001101340  | NM_001101340                |
| 2.84E+02 | 8.15E+00  | TP53 target 3      | ubiquitin-conjug    | NM_016212     | NM_016212                   |
| 2.84E+02 | 8.15E+00  | TP53 target 3      | ubiquitin-conjug    | NM_016212     | NM_016212                   |
| 2.66E+02 | 8.06E+00  | zinc finger, DHH   | zinc finger, DHH    | NM_024786     | NM_024786                   |
| 4.19E+02 | 8.71E+00  | cold inducible R   | chromosome 19       | NM_001280,NR_ | NM_001280,NR_023312,NR_0233 |
| 3.37E-03 | -8.21E+00 | N-terminal aspar   | RRN3 RNA polyr      | NM_173474     | NM_173474                   |
| 3.37E-03 | -8.21E+00 | N-terminal aspar   | RRN3 RNA polyr      | NM_173474     | NM_173474                   |
| 1.84E+00 | 8.77E-01  | transmembrane      | M-phase phosph      | NM_130785,NM  | NM_130785,NM_199254,NM_001  |
| 1.84E+00 | 8.77E-01  | transmembrane      | M-phase phosph      | NM_130785,NM  | NM_130785,NM_199254,NM_001  |
| 1.53E+00 | 6.15E-01  | DnaJ (Hsp40) hor   | DnaJ (Hsp40) hor    | NM_025219     | NM_025219                   |
| 1.53E+00 | 6.15E-01  | DnaJ (Hsp40) hor   | DnaJ (Hsp40) hor    | NM_025219     | NM_025219                   |
| 1.29E+00 | 3.65E-01  | kinase non-catal   | kinase non-catal    | NM_152643     | NM_152643                   |
| 1.29E+00 | 3.65E-01  | kinase non-catal   | kinase non-catal    | NM_152643     | NM_152643                   |
| 3.12E-03 | -8.33E+00 | deafness, autoso   | oxysterol binding   | NM_001127454, | NM_001127454,NM_004403,NM_  |
| 3.48E+02 | 8.44E+00  | ATPase family, A   | ATPase family, A    | NM_001039211  | NM_001039211                |
| 3.48E+02 | 8.44E+00  | ATPase family, A   | ATPase family, A    | NM_001039211  | NM_001039211                |



|          |           |                     |                       |                |                              |              |
|----------|-----------|---------------------|-----------------------|----------------|------------------------------|--------------|
| 3.70E+02 | 8.53E+00  | perilipin 3         | perilipin 3           | NM_005817      | NM_005817                    |              |
| 3.70E+02 | 8.53E+00  | perilipin 3         | perilipin 3           | NM_005817      | NM_005817                    |              |
| 3.91E+02 | 8.61E+00  | lysophosphatidyl    | lysophosphatidyl      | NM_024830      | NM_024830                    |              |
| 3.91E+02 | 8.61E+00  | lysophosphatidyl    | lysophosphatidyl      | NM_024830      | NM_024830                    |              |
| 1.33E+00 | 4.15E-01  | zinc finger and B'  | heat shock 70kD:      | NM_001123329,  | NM_001123329,NM_014950       |              |
| 1.84E+00 | 8.83E-01  | keratin associate   | keratin associate     | NM_031964      | NM_031964                    |              |
| 3.29E+02 | 8.36E+00  | gamma-glutamyl      | gamma-glutamyl        | NM_199127      | NM_199127                    |              |
| 4.03E+02 | 8.65E+00  | forkhead box D2     | Skint-like (pseud     | NM_004474      | NM_004474                    |              |
| 4.03E+02 | 8.65E+00  | forkhead box D2     | Skint-like (pseud     | NM_004474      | NM_004474                    |              |
| 2.78E+02 | 8.12E+00  | testis-specific tra | testis specific prc   | NR_003593,NR_( | NR_003593,NR_001540          |              |
| 2.78E+02 | 8.12E+00  | testis-specific tra | testis specific prc   | NR_003593,NR_( | NR_003593,NR_001540          |              |
| 1.34E+00 | 4.23E-01  | protein phosphatase | protein phosphatase   | NM_013239,NM_  | NM_013239,NM_199326          |              |
| 1.34E+00 | 4.23E-01  | protein phosphatase | protein phosphatase   | NM_013239,NM_  | NM_013239,NM_199326          |              |
| 2.58E+02 | 8.01E+00  | pericentrin         | pericentrin           | NM_006031      | NM_006031                    |              |
| 1.17E+00 | 2.26E-01  | MCF.2 cell line d   | MCF.2 cell line d     | NM_024979      | NM_024979                    |              |
| 1.17E+00 | 2.26E-01  | MCF.2 cell line d   | MCF.2 cell line d     | NM_024979      | NM_024979                    |              |
| 3.49E+02 | 8.45E+00  | phosphoinositide    | netrin 1              | NM_014308,NM_  | NM_014308,NM_001142633       |              |
| 1.81E+00 | 8.59E-01  | signal peptide pe   | signal peptide pe     | NM_152988,NM_  | NM_152988,NM_001077238       |              |
| 1.81E+00 | 8.59E-01  | signal peptide pe   | signal peptide pe     | NM_152988,NM_  | NM_152988,NM_001077238       |              |
| 3.41E+02 | 8.41E+00  | tubulin polymeri    | zinc finger, DHH      | NM_007030      | NM_007030                    |              |
| 3.41E+02 | 8.41E+00  | tubulin polymeri    | zinc finger, DHH      | NM_007030      | NM_007030                    |              |
| 3.44E+02 | 8.43E+00  | sialidase 4         | sialidase 4           | NM_080741      | NM_080741                    |              |
| 3.44E+02 | 8.43E+00  | sialidase 4         | sialidase 4           | NM_080741      | NM_080741                    |              |
| 2.53E+02 | 7.98E+00  | zinc finger CCCH-   | zinc finger CCCH-     | NM_015117      | NM_015117                    |              |
| 2.53E+02 | 7.98E+00  | zinc finger CCCH-   | zinc finger CCCH-     | NM_015117      | NM_015117                    |              |
| 2.83E+02 | 8.14E+00  | lymphocyte anti     | glycosylphosphatase   | NM_003695      | NM_003695                    |              |
| 2.92E+02 | 8.19E+00  | E4F transcription   | E4F transcription     | NM_004424      | NM_004424                    |              |
| 1.25E+00 | 3.21E-01  | XPA binding prot    | XPA binding prot      | NM_020196      | NM_020196                    |              |
| 1.25E+00 | 3.21E-01  | XPA binding prot    | XPA binding prot      | NM_020196      | NM_020196                    |              |
| 1.74E+00 | 8.02E-01  | myosin binding p    | myosin binding p      | NM_000256      | NM_000256                    |              |
| 1.74E+00 | 8.02E-01  | myosin binding p    | myosin binding p      | NM_000256      | NM_000256                    |              |
| 1.71E+00 | 7.71E-01  | potassium intern    | LY6/PLAUR dom:        | NM_002250      | NM_002250                    |              |
| 3.02E-03 | -8.37E+00 | fragile site, foli  | c : leucine-rich, gli | NM_145246      | NM_145246                    |              |
| 3.02E-03 | -8.37E+00 | fragile site, foli  | c : leucine-rich, gli | NM_145246      | NM_145246                    |              |
| 3.10E+02 | 8.28E+00  | acyl-CoA thioest    | acyl-CoA thioest      | NM_147161,NM_  | NM_147161,NM_015547          |              |
| 2.83E+02 | 8.15E+00  | immunity-relate     | immunity-relate       | NM_001007561   | NM_001007561                 |              |
| 2.83E+02 | 8.15E+00  | immunity-relate     | immunity-relate       | NM_001007561   | NM_001007561                 |              |
| 3.52E+02 | 8.46E+00  | transmembrane       | transmembrane         | NM_001136103   | NM_001136103                 |              |
| 2.82E+02 | 8.14E+00  | hypothetical pro    | hypothetical pro      | NR_002942      | NR_002942                    |              |
| 3.77E-03 | -8.05E+00 | lymphocyte anti     | glycosylphosphatase   | NM_003695      | NM_003695                    |              |
| 4.43E+02 | 8.79E+00  | patatin-like phos   | patatin-like phos     | NM_152286,NM_  | NM_152286,NM_001098537       |              |
| 4.43E+02 | 8.79E+00  | patatin-like phos   | patatin-like phos     | NM_152286,NM_  | NM_152286,NM_001098537       |              |
| 3.17E+02 | 8.31E+00  | chondroitin sulfa   | chondroitin sulfa     | NM_001897      | NM_001897                    |              |
| 3.17E+02 | 8.31E+00  | chondroitin sulfa   | chondroitin sulfa     | NM_001897      | NM_001897                    |              |
| 3.76E+02 | 8.56E+00  | shroom family m     | shroom family m       | NM_001649      | NM_001649                    |              |
| 3.76E+02 | 8.56E+00  | shroom family m     | shroom family m       | NM_001649      | NM_001649                    |              |
| 3.37E+02 | 8.40E+00  | ankyrin repeat      | ankyrin repeat        | NM_080871,NM_  | NM_080871,NM_001142459,NM_   |              |
| 3.51E+02 | 8.46E+00  | ADP-ribosylation    | ADP-ribosylation      | NM_001040025   | NM_001040025                 |              |
| 1.75E+00 | 8.05E-01  | biphenyl hydro      | lase biphenyl hydro   | NR_026650,NR_( | NR_026650,NR_026649,NR_02664 |              |
| 1.75E+00 | 8.05E-01  | biphenyl hydro      | lase biphenyl hydro   | NR_026650,NR_( | NR_026650,NR_026649,NR_02664 |              |
| 3.28E+02 | 8.36E+00  | GTP binding prot    | protein phosphatase   | NM_012227      | NM_012227                    |              |
| 1.39E+00 | 4.70E-01  | meteorin, glial     | cc meteorin, glial    | cc             | NM_001004431                 | NM_001004431 |
| 1.39E+00 | 4.70E-01  | meteorin, glial     | cc meteorin, glial    | cc             | NM_001004431                 | NM_001004431 |
| 2.88E+02 | 8.17E+00  | chromosome 17       | chromosome 17         | NM_001109760,  | NM_001109760,NM_025161       |              |
| 3.01E+02 | 8.23E+00  | tripartite motif-c  | tripartite motif-c    | NM_033278,NM_  | NM_033278,NM_006458          |              |
| 3.95E+02 | 8.63E+00  | mucin 4, cell surf  | tyrosine kinase, r    | NM_138297,NM_  | NM_138297,NM_004532,NM_018   |              |
| 3.66E+02 | 8.52E+00  | p21 protein (Cdc    | p21 protein (Cdc      | NM_001014834,  | NM_001014834,NM_001014832,N  |              |
| 1.83E+00 | 8.68E-01  | ataxin 1            | ataxin 1              | NM_001128164,  | NM_001128164,NM_000332       |              |

|          |           |                                                   |                                    |                                            |
|----------|-----------|---------------------------------------------------|------------------------------------|--------------------------------------------|
| 1.83E+00 | 8.68E-01  | ataxin 1                                          | ataxin 1                           | NM_001128164, NM_001128164, NM_000332      |
| 2.94E+02 | 8.20E+00  | lymphocyte anti-glycosylphosphatidyl inositol     |                                    | NM_003695 NM_003695                        |
| 1.83E+00 | 8.68E-01  | ataxin 1                                          | ataxin 1                           | NM_001128164, NM_001128164, NM_000332      |
| 2.77E+02 | 8.11E+00  | calcium channel, voltage-gated L-type             |                                    | NM_021098, NM_021098, NM_001005407         |
| 3.10E+02 | 8.28E+00  | mucin 2, oligomeric mucin 5AC, oligomeric         |                                    | NM_002457 NM_002457                        |
| 3.10E+02 | 8.28E+00  | mucin 2, oligomeric mucin 5AC, oligomeric         |                                    | NM_002457 NM_002457                        |
| 2.73E+02 | 8.09E+00  | deltex homolog 3                                  | deltex homolog 3                   | NM_178502 NM_178502                        |
| 2.73E+02 | 8.09E+00  | deltex homolog 3                                  | deltex homolog 3                   | NM_178502 NM_178502                        |
| 1.10E+00 | 1.41E-01  | leukocyte-associated glycoprotein 1               |                                    | NM_002287, NM_002287, NM_021706            |
| 4.14E-03 | -7.92E+00 | pepsinogen 4, gastric                             | pepsinogen 5, gastric              | NM_001079808 NM_001079808                  |
| 4.14E-03 | -7.92E+00 | pepsinogen 5, gastric                             | pepsinogen 5, gastric              | NM_014224 NM_014224                        |
| 3.41E+02 | 8.41E+00  | DnaJ (Hsp40) homolog protein tyrosine phosphatase |                                    | NM_058246 NM_058246                        |
| 3.41E+02 | 8.41E+00  | DnaJ (Hsp40) homolog protein tyrosine phosphatase |                                    | NM_058246 NM_058246                        |
| 2.83E+02 | 8.15E+00  | elastase, neutrophil                              | elastase, neutrophil               | NM_001972 NM_001972                        |
| 2.80E+02 | 8.13E+00  | neuroligin 3                                      | neuroligin 3                       | NM_018977 NM_018977                        |
| 2.80E+02 | 8.13E+00  | neuroligin 3                                      | neuroligin 3                       | NM_018977 NM_018977                        |
| 3.69E+02 | 8.53E+00  | YdjC homolog (bacterial coiled-coil domain)       |                                    | NM_001017964 NM_001017964                  |
| 3.61E+02 | 8.49E+00  | shroom family member                              | shroom family member               | NM_001649 NM_001649                        |
| 3.61E+02 | 8.49E+00  | shroom family member                              | shroom family member               | NM_001649 NM_001649                        |
| 3.61E+02 | 8.49E+00  | shroom family member                              | shroom family member               | NM_001649 NM_001649                        |
| 2.91E+02 | 8.18E+00  | thimet oligopeptidase                             | thimet oligopeptidase              | NM_003249 NM_003249                        |
| 3.61E+02 | 8.49E+00  | mitogen-activated protein kinase                  | mitogen-activated protein kinase   | NM_030662 NM_030662                        |
| 2.72E+02 | 8.09E+00  | peroxisomal biogenesis phospholipase C            |                                    | NM_002617, NM_002617, NM_153818            |
| 3.06E+02 | 8.26E+00  | collagen, type V                                  | collagen, type V                   | NM_000093 NM_000093                        |
| 1.74E+00 | 7.95E-01  | deformed epidermal growth factor receptor 2       |                                    | NM_021008 NM_021008                        |
| 1.74E+00 | 7.95E-01  | deformed epidermal growth factor receptor 2       |                                    | NM_021008 NM_021008                        |
| 3.74E+02 | 8.55E+00  | CTF18, chromosome 18                              | CTF18, chromosome 18               | NM_022092 NM_022092                        |
| 3.74E+02 | 8.55E+00  | CTF18, chromosome 18                              | CTF18, chromosome 18               | NM_022092 NM_022092                        |
| 3.88E-03 | -8.01E+00 | THUMP domain solute carrier family 12 member 1    |                                    | NM_025264 NM_025264                        |
| 1.66E+00 | 7.31E-01  | ribosomal protein S21                             | ribosomal protein S21              | NR_003572 NR_003572                        |
| 1.66E+00 | 7.31E-01  | ribosomal protein S21                             | ribosomal protein S21              | NR_003572 NR_003572                        |
| 3.43E+02 | 8.42E+00  | phosphatidylinositol 3-kinase                     | phosphatidylinositol 3-kinase      | NM_012398 NM_012398                        |
| 2.82E+02 | 8.14E+00  | C1q and tumor necrosis factor receptor 1          |                                    | NM_207419 NM_207419                        |
| 2.69E+02 | 8.07E+00  | glucokinase (hexameric v-SNARE homolog)           |                                    | NM_000162, NM_000162, NM_033508, NM_033508 |
| 1.82E+00 | 8.65E-01  | zinc finger protein 146                           | zinc finger protein 146            | NM_001134655 NM_001134655                  |
| 1.82E+00 | 8.65E-01  | zinc finger protein 146                           | zinc finger protein 146            | NM_001134655 NM_001134655                  |
| 2.52E+02 | 7.98E+00  | peptidase inhibitor 1                             | peptidase inhibitor 1              | NM_153370 NM_153370                        |
| 2.52E+02 | 7.98E+00  | peptidase inhibitor 1                             | peptidase inhibitor 1              | NM_153370 NM_153370                        |
| 1.34E+00 | 4.19E-01  | zinc finger protein 153                           | zinc finger protein 153            | NM_153813 NM_153813                        |
| 3.54E+02 | 8.47E+00  | chromosome 13 SRY (sex determining region Y)      |                                    | NM_152324 NM_152324                        |
| 3.61E+02 | 8.49E+00  | ankyrin repeat domain phosphoglucomutase          |                                    | NM_001012419, NM_001012419, NM_032250      |
| 3.57E+02 | 8.48E+00  | hypothetical LOC101928 family, C glycosylated     |                                    | NR_015411 NR_015411                        |
| 3.09E+02 | 8.27E+00  | isoprenylcysteine hairy and enhancer of split 1   |                                    | NM_012405 NM_012405                        |
| 3.09E+02 | 8.27E+00  | isoprenylcysteine hairy and enhancer of split 1   |                                    | NM_012405 NM_012405                        |
| 3.09E+02 | 8.27E+00  | UDP-N-acetylglucosamine 6-phosphate 4-epimerase   |                                    | NM_021808, NM_021808, NM_001122636         |
| 1.13E+00 | 1.79E-01  | wingless-type Myosin I                            | wingless-type Myosin I             | NM_003395 NM_003395                        |
| 3.65E-03 | -8.10E+00 | PRP38 pre-mRNA                                    | PRP38 pre-mRNA                     | NM_032864 NM_032864                        |
| 3.65E-03 | -8.10E+00 | PRP38 pre-mRNA                                    | PRP38 pre-mRNA                     | NM_032864 NM_032864                        |
| 1.72E+00 | 7.82E-01  | glycerophosphocholine glycerophosphocholine       |                                    | NM_024307 NM_024307                        |
| 3.50E+02 | 8.45E+00  | netrin 3                                          | netrin 3                           | NM_006181 NM_006181                        |
| 1.74E+00 | 8.02E-01  | DIP2 disco-interactor 1                           | DIP2 disco-interactor 1            | NM_014974 NM_014974                        |
| 3.17E+02 | 8.31E+00  | chromosome 8 o                                    | chromosome 8 o                     | NR_026785 NR_026785                        |
| 2.82E+02 | 8.14E+00  | protein tyrosine phosphatase                      | protein tyrosine phosphatase       | NM_130842, NM_130842, NM_130843, NM_002287 |
| 2.82E+02 | 8.14E+00  | protein tyrosine phosphatase                      | protein tyrosine phosphatase       | NM_130842, NM_130842, NM_130843, NM_002287 |
| 3.79E+02 | 8.57E+00  | cell division cycle heat shock protein 70         |                                    | NM_001134420 NM_001134420                  |
| 3.79E+02 | 8.57E+00  | cell division cycle heat shock protein 70         |                                    | NM_001134420 NM_001134420                  |
| 3.70E+02 | 8.53E+00  | Rho GTPase activator 1                            | Rho GTPase activator 1             | NM_021226 NM_021226                        |
| 2.88E+02 | 8.17E+00  | uroplakin 1A                                      | zinc finger and BTB domain protein | NM_007000 NM_007000                        |

|          |           |                                       |                                       |                                       |
|----------|-----------|---------------------------------------|---------------------------------------|---------------------------------------|
| 2.88E+02 | 8.17E+00  | uroplakin 1A zinc finger and B'       | NM_007000                             | NM_007000                             |
| 2.86E+02 | 8.16E+00  | lymphocyte-spec lymphocyte-spec       | NR_027238                             | NR_027238                             |
| 1.33E+00 | 4.16E-01  | DnaJ (Hsp40) hor DnaJ (Hsp40) hor     | NM_001001394                          | NM_001001394                          |
| 3.69E+02 | 8.53E+00  | chromosome 19 BTB (POZ) domai         | NM_152771                             | NM_152771                             |
| 3.69E+02 | 8.53E+00  | chromosome 19 BTB (POZ) domai         | NM_152771                             | NM_152771                             |
| 2.09E+00 | 1.06E+00  | G protein-couple zinc finger, AN1-i   | NM_001098201                          | NM_001098201                          |
| 2.94E+02 | 8.20E+00  | chromosome 20 chromosome 20           | NM_199181                             | NM_199181                             |
| 3.61E+02 | 8.49E+00  | ankyrin repeat d ankylrin repeat d    | NM_013275                             | NM_013275                             |
| 3.61E+02 | 8.49E+00  | ankyrin repeat d ankylrin repeat d    | NM_013275                             | NM_013275                             |
| 3.61E+02 | 8.49E+00  | ankyrin repeat d ankylrin repeat d    | NM_013275                             | NM_013275                             |
| 1.41E+00 | 4.98E-01  | null rabphilin 3A-like null           | null                                  | null                                  |
| 1.41E+00 | 4.98E-01  | null rabphilin 3A-like null           | null                                  | null                                  |
| 1.33E+00 | 4.15E-01  | POTE ankyrin doi POTE ankyrin doi     | NM_001005356, NR_027480               | NM_001005356, NR_027480               |
| 1.33E+00 | 4.15E-01  | POTE ankyrin doi POTE ankyrin doi     | NM_001005356, NR_027480               | NM_001005356, NR_027480               |
| 1.33E+00 | 4.15E-01  | POTE ankyrin doi POTE ankyrin doi     | NM_001005356, NR_027480               | NM_001005356, NR_027480               |
| 3.32E+02 | 8.38E+00  | peroxisomal prol peroxisomal prol     | NM_001037335, NM_033405               | NM_001037335, NM_033405               |
| 3.32E+02 | 8.38E+00  | peroxisomal prol peroxisomal prol     | NM_001037335, NM_033405               | NM_001037335, NM_033405               |
| 1.90E+00 | 9.27E-01  | transmembrane KIAA1671                | NM_001001663                          | NM_001001663                          |
| 1.38E+00 | 4.67E-01  | castor zinc finger castor zinc finger | NM_017766                             | NM_017766                             |
| 3.21E+02 | 8.33E+00  | calmodulin regul calmodulin regul     | NM_015447                             | NM_015447                             |
| 3.21E+02 | 8.33E+00  | calmodulin regul calmodulin regul     | NM_015447                             | NM_015447                             |
| 3.40E+02 | 8.41E+00  | notch 1 notch 1                       | NM_017617                             | NM_017617                             |
| 3.40E+02 | 8.41E+00  | notch 1 notch 1                       | NM_017617                             | NM_017617                             |
| 3.40E+02 | 8.41E+00  | notch 1 notch 1                       | NM_017617                             | NM_017617                             |
| 2.75E+02 | 8.10E+00  | protein inhibitor protein inhibitor   | NM_015897                             | NM_015897                             |
| 2.75E+02 | 8.10E+00  | protein inhibitor protein inhibitor   | NM_015897                             | NM_015897                             |
| 2.75E+02 | 8.10E+00  | protein inhibitor protein inhibitor   | NM_015897                             | NM_015897                             |
| 2.75E+02 | 8.10E+00  | protein inhibitor zinc finger and B'  | NM_015897                             | NM_015897                             |
| 1.15E+00 | 1.98E-01  | X antigen family, X antigen family,   | NM_133179                             | NM_133179                             |
| 1.15E+00 | 1.98E-01  | X antigen family, X antigen family,   | NM_133179                             | NM_133179                             |
| 1.15E+00 | 1.98E-01  | X antigen family, family with sequ    | NM_133179                             | NM_133179                             |
| 3.32E+02 | 8.38E+00  | peroxisomal prol peroxisomal prol     | NM_001037335, NM_033405               | NM_001037335, NM_033405               |
| 1.60E+00 | 6.82E-01  | family with sequi hypothetical LOC    | NM_015667                             | NM_015667                             |
| 1.60E+00 | 6.82E-01  | family with sequi hypothetical LOC    | NM_015667                             | NM_015667                             |
| 3.88E+02 | 8.60E+00  | TBC1 domain fan TBC1 domain fan       | NM_019020                             | NM_019020                             |
| 3.88E+02 | 8.60E+00  | TBC1 domain fan TBC1 domain fan       | NM_019020                             | NM_019020                             |
| 4.08E-03 | -7.94E+00 | --- surfactant protei                 | NM_006926                             | NM_006926                             |
| 1.79E+00 | 8.44E-01  | mucin 6, oligome mucin 2, oligome     | NM_005961                             | NM_005961                             |
| 1.79E+00 | 8.44E-01  | mucin 6, oligome mucin 2, oligome     | NM_005961                             | NM_005961                             |
| 1.95E+00 | 9.60E-01  | transmembrane transmembrane           | NM_021259                             | NM_021259                             |
| 1.16E+00 | 2.13E-01  | otospiralin glypican 1                | NM_148961                             | NM_148961                             |
| 3.83E+02 | 8.58E+00  | protein phosphai protein phosphai     | NM_013239, NM_199326                  | NM_013239, NM_199326                  |
| 2.74E+02 | 8.10E+00  | CD164 sialomuci G protein-couple      | NM_207397                             | NM_207397                             |
| 2.77E+02 | 8.11E+00  | agrln agrln                           | NM_198576                             | NM_198576                             |
| 3.74E-03 | -8.06E+00 | zinc finger protei zinc finger protei | NM_144684                             | NM_144684                             |
| 3.74E-03 | -8.06E+00 | zinc finger protei zinc finger protei | NM_173530                             | NM_173530                             |
| 4.37E+02 | 8.77E+00  | anoctamin 8 anoctamin 8               | NM_020959                             | NM_020959                             |
| 1.91E+00 | 9.35E-01  | adaptor-related j adaptor-related j   | NM_003938                             | NM_003938                             |
| 4.28E+02 | 8.74E+00  | zinc finger protei zinc finger protei | NM_001079906                          | NM_001079906                          |
| 3.64E+02 | 8.51E+00  | obscurin, cytoske obscurin, cytoske   | NM_052843, NM_001098623               | NM_052843, NM_001098623               |
| 2.73E+02 | 8.09E+00  | poliovirus recept poliovirus recept   | NM_001135768, NM_001135769, NR_023345 | NM_001135768, NM_001135769, NR_023345 |
| 1.88E+00 | 9.07E-01  | connector enhan connector enhan       | NR_023345                             | NR_023345                             |
| 2.70E+02 | 8.08E+00  | UDP-Gal:betaGal family with sequ      | NM_080605                             | NM_080605                             |
| 2.70E+02 | 8.08E+00  | family with sequi family with sequi   | NM_001014980                          | NM_001014980                          |
| 1.52E+00 | 6.08E-01  | gap junction prot gap junction prot   | NM_001097642                          | NM_001097642                          |
| 3.82E-03 | -8.03E+00 | Ras association ( aryl hydrocarbor    | NM_001080521                          | NM_001080521                          |
| 3.82E-03 | -8.03E+00 | Ras association ( aryl hydrocarbor    | NM_001080521                          | NM_001080521                          |
| 1.70E+00 | 7.69E-01  | forkhead box K1 forkhead box K1       | NM_001037165                          | NM_001037165                          |

|          |           |                    |                      |               |                            |
|----------|-----------|--------------------|----------------------|---------------|----------------------------|
| 1.70E+00 | 7.69E-01  | forkhead box K1    | forkhead box K1      | NM_001037165  | NM_001037165               |
| 3.11E+02 | 8.28E+00  | protein kinase D;  | protein kinase D;    | NM_016457,NM  | NM_016457,NM_001079880,NM_ |
| 3.11E+02 | 8.28E+00  | protein kinase D;  | protein kinase D;    | NM_016457,NM  | NM_016457,NM_001079880,NM_ |
| 3.45E-03 | -8.18E+00 | chromosome 1 o     | chromosome 1 o       | NM_182581     | NM_182581                  |
| 3.45E-03 | -8.18E+00 | chromosome 1 o     | chromosome 1 o       | NM_182581     | NM_182581                  |
| 3.17E+02 | 8.31E+00  | calcium activate   | calcium activate     | NM_138793     | NM_138793                  |
| 3.17E+02 | 8.31E+00  | calcium activate   | calcium activate     | NM_138793     | NM_138793                  |
| 3.97E+02 | 8.63E+00  | hypothetical LOC   | fibrosin-like 1      | NR_024563     | NR_024563                  |
| 3.97E+02 | 8.63E+00  | hypothetical LOC   | fibrosin-like 1      | NR_024563     | NR_024563                  |
| 2.88E+02 | 8.17E+00  | F-box and leucin   | F-box and leucin     | NM_024963     | NM_024963                  |
| 2.86E+02 | 8.16E+00  | eukaryotic transl  | eukaryotic transl    | NM_001130053, | NM_001130053,NM_032378,NM_ |
| 1.43E+00 | 5.18E-01  | BARX homeobox      | BARX homeobox        | NM_003658     | NM_003658                  |
| 1.43E+00 | 5.18E-01  | BARX homeobox      | BARX homeobox        | NM_003658     | NM_003658                  |
| 3.30E+02 | 8.37E+00  | intercellular adh  | intercellular adh    | NM_003259     | NM_003259                  |
| 1.29E+00 | 3.69E-01  | chromosome 13      | non-protein codi     | NM_153218     | NM_153218                  |
| 4.09E-03 | -7.93E+00 | zinc finger protei | zinc finger family   | NM_012256     | NM_012256                  |
| 1.40E+00 | 4.87E-01  | coiled-coil domai  | beta-1,4-N-acety     | NM_032358,NM  | NM_032358,NM_001130146     |
| 2.90E+02 | 8.18E+00  | polypyrimidine tr  | polypyrimidine tr    | NM_002819,NM  | NM_002819,NM_031990,NM_031 |
| 2.90E+02 | 8.18E+00  | polypyrimidine tr  | polypyrimidine tr    | NM_002819,NM  | NM_002819,NM_031990,NM_031 |
| 2.43E+02 | 7.93E+00  | hypothetical LOC   | splicing factor, a   | NR_026670     | NR_026670                  |
| 1.98E+00 | 9.83E-01  | chromosome 21      | non-protein codi     | NM_058190     | NM_058190                  |
| 1.98E+00 | 9.83E-01  | chromosome 21      | non-protein codi     | NM_058190     | NM_058190                  |
| 1.36E+00 | 4.45E-01  | chromosome 1 o     | Fc fragment of Ig    | NM_001013625  | NM_001013625               |
| 1.36E+00 | 4.45E-01  | chromosome 1 o     | Fc fragment of Ig    | NM_001013625  | NM_001013625               |
| 1.36E+00 | 4.45E-01  | chromosome 1 o     | Fc fragment of Ig    | NM_001013625  | NM_001013625               |
| 1.36E+00 | 4.45E-01  | chromosome 1 o     | Fc fragment of Ig    | NM_001013625  | NM_001013625               |
| 1.36E+00 | 4.45E-01  | chromosome 1 o     | Fc fragment of Ig    | NM_001013625  | NM_001013625               |
| 1.36E+00 | 4.45E-01  | chromosome 1 o     | Fc fragment of Ig    | NM_001013625  | NM_001013625               |
| 1.69E+00 | 7.59E-01  | chromosome 21      | chromosome 21        | NM_144991     | NM_144991                  |
| 1.29E+00 | 3.62E-01  | Zic family memb    | Zic family memb      | NM_032153     | NM_032153                  |
| 3.46E-03 | -8.18E+00 | UDP glucuronosy    | UDP glucuronosy      | NM_019077     | NM_019077                  |
| 3.72E+02 | 8.54E+00  | hypothetical pro   | peripheral myeli     | NR_026880     | NR_026880                  |
| 3.72E+02 | 8.54E+00  | hypothetical pro   | peripheral myeli     | NR_026880     | NR_026880                  |
| 3.91E+02 | 8.61E+00  | WDR45-like         | RAB40B, membe        | NM_019613     | NM_019613                  |
| 2.61E+02 | 8.03E+00  | BAI1-associated    | BAI1-associated      | NM_003933     | NM_003933                  |
| 2.61E+02 | 8.03E+00  | BAI1-associated    | BAI1-associated      | NM_003933     | NM_003933                  |
| 1.65E+00 | 7.27E-01  | fibrinogen C dor   | fibrinogen C dor     | NM_001145106, | NM_001145106,NM_032843     |
| 1.65E+00 | 7.27E-01  | fibrinogen C dor   | fibrinogen C dor     | NM_001145106, | NM_001145106,NM_032843     |
| 1.40E+00 | 4.85E-01  | neuroligin 4, Y-   | lir non-protein codi | NM_014893     | NM_014893                  |
| 1.40E+00 | 4.85E-01  | neuroligin 4, Y-   | lir non-protein codi | NM_014893     | NM_014893                  |
| 1.40E+00 | 4.85E-01  | neuroligin 4, Y-   | lir non-protein codi | NM_014893     | NM_014893                  |
| 1.23E+00 | 3.03E-01  | family with sequ   | fumarylacetoace      | NM_016490     | NM_016490                  |
| 3.33E+02 | 8.38E+00  | calmodulin regul   | calmodulin regul     | NM_015447     | NM_015447                  |
| 2.75E+02 | 8.10E+00  | transmembrane      | proteasome (pro      | NM_001097620  | NM_001097620               |
| 2.75E+02 | 8.10E+00  | transmembrane      | proteasome (pro      | NM_001097620  | NM_001097620               |
| 4.48E+02 | 8.81E+00  | DIRAS family, GT   | DIRAS family, GT     | NM_145173     | NM_145173                  |
| 4.48E+02 | 8.81E+00  | DIRAS family, GT   | DIRAS family, GT     | NM_145173     | NM_145173                  |
| 3.83E+02 | 8.58E+00  | lipase maturatio   | lipase maturatio     | NM_022773     | NM_022773                  |
| 3.83E+02 | 8.58E+00  | lipase maturatio   | lipase maturatio     | NM_022773     | NM_022773                  |
| 3.83E+02 | 8.58E+00  | lipase maturatio   | lipase maturatio     | NM_022773     | NM_022773                  |
| 1.78E+00 | 8.29E-01  | active BCR-relate  | active BCR-relate    | NM_001159746  | NM_001159746               |
| 4.07E-03 | -7.94E+00 | family with sequ   | transmembrane        | NM_001002919  | NM_001002919               |
| 2.86E+02 | 8.16E+00  | paralemmin         | chromosome 19        | NM_001040134, | NM_001040134,NM_002579     |
| 1.64E+00 | 7.14E-01  | G protein pathwa   | G protein pathwa     | NM_004127,NM  | NM_004127,NM_212492        |
| 1.69E+00 | 7.53E-01  | ---                | zinc finger protei   | NR_027050     | NR_027050                  |
| 1.69E+00 | 7.53E-01  | ---                | zinc finger protei   | NR_027050     | NR_027050                  |
| 2.55E+02 | 7.99E+00  | mucin 6, oligome   | mucin 2, oligome     | NM_005961     | NM_005961                  |
| 2.55E+02 | 7.99E+00  | mucin 2, oligome   | mucin 2, oligome     | NM_002457     | NM_002457                  |

|          |           |                                                                             |              |
|----------|-----------|-----------------------------------------------------------------------------|--------------|
| 1.42E+00 | 5.02E-01  | carbohydrate (N- carbohydrate (N- NM_024533                                 | NM_024533    |
| 2.51E+02 | 7.97E+00  | GDP-mannose 4, GDP-mannose 4, NM_001500                                     | NM_001500    |
| 1.78E+00 | 8.33E-01  | heat shock 70kD: KIAA1598 NM_025015                                         | NM_025015    |
| 1.78E+00 | 8.33E-01  | heat shock 70kD: KIAA1598 NM_025015                                         | NM_025015    |
| 4.38E-03 | -7.83E+00 | carcinoembryoni carcinoembryoni NM_020219,NM_020219,NM_001127893            |              |
| 4.30E-03 | -7.86E+00 | small nucleolar R chromosome 8 o NR_002581                                  | NR_002581    |
| 3.44E+02 | 8.43E+00  | smoothelin-like 2 smoothelin-like 2 NM_001114974                            | NM_001114974 |
| 1.25E+00 | 3.19E-01  | Fc fragment of Ig Fc fragment of Ig NM_003890                               | NM_003890    |
| 1.25E+00 | 3.19E-01  | Fc fragment of Ig Fc fragment of Ig NM_003890                               | NM_003890    |
| 3.44E-03 | -8.18E+00 | signal transducer polymerase I anc NM_213662,NM_213662,NM_139276,NM_003     |              |
| 2.97E+02 | 8.22E+00  | non-protein codi collagen, type XV NR_027498,NM_027498,NM_199175            |              |
| 3.70E+02 | 8.53E+00  | zinc finger protei zinc finger protei NM_144631                             | NM_144631    |
| 3.70E+02 | 8.53E+00  | zinc finger protei zinc finger protei NM_144631                             | NM_144631    |
| 3.09E+02 | 8.27E+00  | MOB1, Mps One MOB1, Mps One NM_130807                                       | NM_130807    |
| 3.28E+02 | 8.36E+00  | telomerase rever telomerase rever NM_198253,NM_198253,NM_198255             |              |
| 3.58E+02 | 8.48E+00  | GTP binding prot GTP binding prot NM_012227                                 | NM_012227    |
| 3.58E+02 | 8.48E+00  | GTP binding prot GTP binding prot NM_012227                                 | NM_012227    |
| 3.61E+02 | 8.49E+00  | mitogen-activate mitogen-activate NM_030662                                 | NM_030662    |
| 1.71E+00 | 7.72E-01  | solute carrier fan solute carrier fan NM_001636                             | NM_001636    |
| 1.58E+00 | 6.62E-01  | prostaglandin I2 guanine nucleoti NM_000960                                 | NM_000960    |
| 3.50E+02 | 8.45E+00  | alkaline phospho alkaline phospho NM_001631                                 | NM_001631    |
| 3.12E+02 | 8.29E+00  | vacuolar protein vacuolar protein NM_015378,NM_015378,NM_018156             |              |
| 3.12E+02 | 8.29E+00  | vacuolar protein vacuolar protein NM_015378,NM_015378,NM_018156             |              |
| 3.74E+02 | 8.55E+00  | adenomatosis pc adenomatosis pc NM_153360                                   | NM_153360    |
| 1.30E+00 | 3.76E-01  | thrombospondin thrombospondin NM_003247                                     | NM_003247    |
| 3.84E+02 | 8.59E+00  | G protein-couple G protein-couple NM_001083909                              | NM_001083909 |
| 3.01E+02 | 8.23E+00  | twinfilin, actin-bi protein phospho NM_007284                               | NM_007284    |
| 3.89E+02 | 8.60E+00  | obscurin-like 1 obscurin-like 1 NM_015311                                   | NM_015311    |
| 3.11E+02 | 8.28E+00  | lemur tyrosine ki lemur tyrosine ki NM_001080434                            | NM_001080434 |
| 3.11E+02 | 8.28E+00  | lemur tyrosine ki lemur tyrosine ki NM_001080434                            | NM_001080434 |
| 1.87E+00 | 9.06E-01  | adaptor-related j adaptor-related j NM_003938                               | NM_003938    |
| 1.87E+00 | 9.06E-01  | adaptor-related j adaptor-related j NM_003938                               | NM_003938    |
| 3.54E+02 | 8.47E+00  | protein kinase C protein kinase C NM_016223                                 | NM_016223    |
| 2.35E+02 | 7.88E+00  | arylsulfatase D arylsulfatase D NM_001669                                   | NM_001669    |
| 2.35E+02 | 7.88E+00  | arylsulfatase D arylsulfatase D NM_001669                                   | NM_001669    |
| 4.18E-03 | -7.90E+00 | fucosyltransferas MAK16 homolog NM_032664                                   | NM_032664    |
| 4.18E-03 | -7.90E+00 | fucosyltransferas MAK16 homolog NM_032664                                   | NM_032664    |
| 2.69E+02 | 8.07E+00  | cytospin A adenosine A2a re NM_015330,NM_015330,NM_001145468                |              |
| 1.38E+00 | 4.62E-01  | ArfGAP with SH3 ArfGAP with SH3 NM_001135191, NM_001135191,NM_003887        |              |
| 1.38E+00 | 4.62E-01  | ArfGAP with SH3 ArfGAP with SH3 NM_001135191, NM_001135191,NM_003887        |              |
| 1.76E+00 | 8.20E-01  | odz, odd Oz/ten- odz, odd Oz/ten- NM_001098816                              | NM_001098816 |
| 1.76E+00 | 8.20E-01  | odz, odd Oz/ten- odz, odd Oz/ten- NM_001098816                              | NM_001098816 |
| 1.76E+00 | 8.13E-01  | interleukin 3 recsolute carrier fan NM_002183                               | NM_002183    |
| 1.76E+00 | 8.13E-01  | solute carrier fan solute carrier fan NM_001636                             | NM_001636    |
| 3.59E-03 | -8.12E+00 | Rho GTPase activ ATP-binding cass NM_004815                                 | NM_004815    |
| 2.74E+02 | 8.10E+00  | insulin-like growt insulin-like growi NM_004970,NM_004970,NM_001146006,NR_0 |              |
| 3.12E+02 | 8.29E+00  | pim-3 oncogene pim-3 oncogene NM_001001852                                  | NM_001001852 |
| 4.00E+02 | 8.64E+00  | obscurin-like 1 obscurin-like 1 NM_015311                                   | NM_015311    |
| 4.00E+02 | 8.64E+00  | obscurin-like 1 obscurin-like 1 NM_015311                                   | NM_015311    |
| 4.18E+02 | 8.71E+00  | calmodulin bindi calmodulin bindi NM_015215                                 | NM_015215    |
| 4.18E+02 | 8.71E+00  | calmodulin bindi calmodulin bindi NM_015215                                 | NM_015215    |
| 4.00E+02 | 8.64E+00  | zinc finger protei non-protein codi NM_003408                               | NM_003408    |
| 3.22E+02 | 8.33E+00  | ATPase, class VI, ATPase, class VI, NM_032189,NM_032189,NM_015205           |              |
| 1.66E+00 | 7.27E-01  | non-protein codi hydroxysteroid (: NR_024129                                | NR_024129    |
| 1.66E+00 | 7.27E-01  | non-protein codi hydroxysteroid (: NR_024129                                | NR_024129    |
| 3.01E+02 | 8.23E+00  | aquaporin 9 lipase, hepatic NM_020980                                       | NM_020980    |
| 2.70E+02 | 8.08E+00  | BCL6 corepresso BCL6 corepresso NM_001123383, NM_001123383,NM_001123384,N   |              |
| 3.73E+02 | 8.54E+00  | low density lipop adrenergic, alph: NM_002337                               | NM_002337    |

|          |           |                                         |                                          |              |
|----------|-----------|-----------------------------------------|------------------------------------------|--------------|
| 3.73E+02 | 8.54E+00  | low density lipopadrenergic, alpha      | NM_002337                                | NM_002337    |
| 3.33E+02 | 8.38E+00  | similar to hCG19: similar to hCG19      | NR_026913                                | NR_026913    |
| 3.33E+02 | 8.38E+00  | similar to hCG19: similar to hCG19      | NR_026913                                | NR_026913    |
| 3.86E-03 | -8.02E+00 | placenta-specific family with sequ      | NM_182832                                | NM_182832    |
| 3.59E-03 | -8.12E+00 | chromosome 5 o F-box protein 4          | NM_175921                                | NM_175921    |
| 3.16E-03 | -8.31E+00 | angel homolog 1 chromosome 14           | NM_015305                                | NM_015305    |
| 1.41E+00 | 5.01E-01  | chorionic gonad chorionic gonad         | NM_033183                                | NM_033183    |
| 1.41E+00 | 5.01E-01  | chorionic gonad chorionic gonad         | NM_033183                                | NM_033183    |
| 2.94E+02 | 8.20E+00  | vesicle-associate period homolog        | NM_004781                                | NM_004781    |
| 2.94E+02 | 8.20E+00  | period homolog : period homolog         | NM_016831                                | NM_016831    |
| 2.93E+02 | 8.19E+00  | ribosomal protei ribosomal protei       | NM_001006932, NM_001006932, NM_021135    |              |
| 2.93E+02 | 8.19E+00  | ribosomal protei ribosomal protei       | NM_001006932, NM_001006932, NM_021135    |              |
| 4.08E+02 | 8.67E+00  | STIP1 homology STIP1 homology           | NM_005861                                | NM_005861    |
| 4.08E+02 | 8.67E+00  | STIP1 homology STIP1 homology           | NM_005861                                | NM_005861    |
| 3.32E+02 | 8.38E+00  | rabphilin 3A-like rabphilin 3A-like     | NM_006987                                | NM_006987    |
| 3.32E+02 | 8.38E+00  | rabphilin 3A-like rabphilin 3A-like     | NM_006987                                | NM_006987    |
| 3.08E+02 | 8.27E+00  | zinc finger protei zinc finger protei   | NM_016535                                | NM_016535    |
| 3.08E+02 | 8.27E+00  | zinc finger protei zinc finger protei   | NM_016535                                | NM_016535    |
| 3.08E+02 | 8.27E+00  | zinc finger protei zinc finger protei   | NM_016535                                | NM_016535    |
| 2.88E+02 | 8.17E+00  | scleraxis homolo heat shock trans       | NM_001008271, NM_001008271, NM_001080514 |              |
| 3.51E-03 | -8.15E+00 | histocompatibilit histocompatibilit     | NM_021182                                | NM_021182    |
| 2.45E+02 | 7.94E+00  | galanin receptor sal-like 3 (Droso      | NM_001480                                | NM_001480    |
| 2.45E+02 | 7.94E+00  | galanin receptor sal-like 3 (Droso      | NM_001480                                | NM_001480    |
| 3.00E+02 | 8.23E+00  | glutamate recept glutamate recept       | NM_138690                                | NM_138690    |
| 3.00E+02 | 8.23E+00  | glutamate recept glutamate recept       | NM_138690                                | NM_138690    |
| 1.84E+00 | 8.80E-01  | ras responsive el signal sequence i     | NM_001003698, NM_001003698, NM_001003699 |              |
| 3.80E-03 | -8.04E+00 | RMI1, RecQ med solute carrier fan       | NM_024945                                | NM_024945    |
| 3.13E+02 | 8.29E+00  | ATPase, H+/K+ e: G protein-couple       | NM_000705                                | NM_000705    |
| 3.55E-03 | -8.14E+00 | paired box 4 staphylococcal n           | NM_006193                                | NM_006193    |
| 3.29E+02 | 8.36E+00  | POM121 membr gamma-glutamyl             | NR_024591                                | NR_024591    |
| 2.72E+02 | 8.09E+00  | lysine (K)-specific lysine (K)-specific | NM_015015                                | NM_015015    |
| 2.72E+02 | 8.09E+00  | lysine (K)-specific lysine (K)-specific | NM_015015                                | NM_015015    |
| 3.42E+02 | 8.42E+00  | small nuclear RN small nuclear RN       | NM_003086                                | NM_003086    |
| 3.40E+02 | 8.41E+00  | G protein-couple hypothetical LOC       | NM_198827                                | NM_198827    |
| 3.40E+02 | 8.41E+00  | G protein-couple hypothetical LOC       | NM_198827                                | NM_198827    |
| 1.70E+00 | 7.63E-01  | NCK adaptor pro NCK adaptor pro         | NM_001004720                             | NM_001004720 |
| 1.70E+00 | 7.63E-01  | NCK adaptor pro NCK adaptor pro         | NM_001004720                             | NM_001004720 |
| 4.14E-03 | -7.92E+00 | olfactory receptc olfactory receptc     | NM_012363                                | NM_012363    |
| 3.74E-03 | -8.06E+00 | upstream transci upstream transci       | NM_207005, NM_207005, NM_007122          |              |
| 1.39E+00 | 4.78E-01  | PR domain conta PR domain conta         | NM_022115                                | NM_022115    |
| 1.39E+00 | 4.78E-01  | PR domain conta PR domain conta         | NM_022115                                | NM_022115    |
| 3.75E+02 | 8.55E+00  | melanophilin prolactin releasir         | NM_001042467, NM_001042467, NM_024101    |              |
| 3.93E+02 | 8.62E+00  | EH-domain contz EH-domain contz         | NM_014601                                | NM_014601    |
| 3.93E+02 | 8.62E+00  | EH-domain contz EH-domain contz         | NM_014601                                | NM_014601    |
| 3.93E+02 | 8.62E+00  | EH-domain contz EH-domain contz         | NM_014601                                | NM_014601    |
| 2.66E+02 | 8.06E+00  | GRAM domain cc GRAM domain cc           | NM_015124                                | NM_015124    |
| 2.66E+02 | 8.06E+00  | GRAM domain cc GRAM domain cc           | NM_015124                                | NM_015124    |
| 1.60E+00 | 6.76E-01  | nuclear receptor nuclear receptor       | NM_006312, NM_006312, NM_001077261       |              |
| 2.78E+02 | 8.12E+00  | family with sequi family with sequi     | NM_198549                                | NM_198549    |
| 2.78E+02 | 8.12E+00  | family with sequi family with sequi     | NM_198549                                | NM_198549    |
| 3.79E+02 | 8.57E+00  | adenosine deami adenosine deami         | NM_018702                                | NM_018702    |
| 2.63E+02 | 8.04E+00  | EGF-like-domain, EGF-like-domain,       | NM_030652                                | NM_030652    |
| 2.63E+02 | 8.04E+00  | EGF-like-domain, EGF-like-domain,       | NM_030652                                | NM_030652    |
| 3.16E+02 | 8.30E+00  | zinc finger protei zinc finger protei   | NM_014643                                | NM_014643    |
| 3.16E+02 | 8.30E+00  | zinc finger protei zinc finger protei   | NM_014643                                | NM_014643    |
| 4.14E+02 | 8.69E+00  | null transmembrane null                 | null                                     |              |
| 2.74E+02 | 8.10E+00  | insulin-like growt insulin-like growt   | NM_004970, NM_004970, NM_001146006, NR_( |              |
| 4.06E-03 | -7.94E+00 | Janus kinase 1 adenylate kinase         | NM_002227                                | NM_002227    |

|          |           |                    |                    |                                           |
|----------|-----------|--------------------|--------------------|-------------------------------------------|
| 1.33E+00 | 4.16E-01  | transcription eloi | transcription eloi | NM_001100817, NM_001100817,NM_145653      |
| 1.33E+00 | 4.16E-01  | transcription eloi | transcription eloi | NM_001100817, NM_001100817,NM_145653      |
| 1.33E+00 | 4.16E-01  | transcription eloi | transcription eloi | NM_001100817, NM_001100817,NM_145653      |
| 1.33E+00 | 4.16E-01  | transcription eloi | transcription eloi | NM_001100817, NM_001100817,NM_145653      |
| 1.33E+00 | 4.16E-01  | transcription eloi | transcription eloi | NM_001100817, NM_001100817,NM_145653      |
| 4.26E+02 | 8.73E+00  | cadherin, EGF LA   | cadherin, EGF LA   | NM_014246 NM_014246                       |
| 4.26E+02 | 8.73E+00  | cadherin, EGF LA   | cadherin, EGF LA   | NM_014246 NM_014246                       |
| 2.01E+00 | 1.01E+00  | zinc finger protei | zinc finger protei | NM_018197,NM_018197,NM_199426,NM_022      |
| 2.01E+00 | 1.01E+00  | zinc finger protei | zinc finger protei | NM_018197,NM_018197,NM_199426,NM_022      |
| 1.66E+00 | 7.35E-01  | CD7 molecule       | secreted and tra   | NM_006137 NM_006137                       |
| 1.32E+00 | 4.06E-01  | forkhead box L1    | F-box protein 31   | NM_005250 NM_005250                       |
| 5.27E+02 | 9.04E+00  | insulin-like growt | insulin-like growi | NM_000875 NM_000875                       |
| 3.26E+02 | 8.35E+00  | core-binding fact  | core-binding fact  | NM_175931,NM_175931,NM_005187             |
| 3.26E+02 | 8.35E+00  | core-binding fact  | core-binding fact  | NM_175931,NM_175931,NM_005187             |
| 3.34E+02 | 8.38E+00  | protein phosphat   | dynein, cytoplasi  | NM_178588,NM_178588,NM_178587,NM_002      |
| 1.21E+00 | 2.71E-01  | prosaposin-like 1  | AFAP1 antisense    | NM_001085382 NM_001085382                 |
| 1.21E+00 | 2.71E-01  | prosaposin-like 1  | AFAP1 antisense    | NM_001085382 NM_001085382                 |
| 1.45E+00 | 5.39E-01  | RAB12, member      | KIAA0802           | NM_001025300 NM_001025300                 |
| 1.45E+00 | 5.39E-01  | RAB12, member      | KIAA0802           | NM_001025300 NM_001025300                 |
| 2.90E+02 | 8.18E+00  | null               | phosphatidylinos   | null null                                 |
| 2.90E+02 | 8.18E+00  | null               | phosphatidylinos   | null null                                 |
| 1.39E+00 | 4.70E-01  | TYRO protein tyr   | TYRO protein tyr   | NM_198125,NM_198125,NM_003332             |
| 1.39E+00 | 4.70E-01  | TYRO protein tyr   | TYRO protein tyr   | NM_198125,NM_198125,NM_003332             |
| 1.77E+00 | 8.25E-01  | zeta-chain (TCR)   | zeta-chain (TCR)   | NM_207519 NM_207519                       |
| 1.82E+00 | 8.67E-01  | NADH dehydroge     | NADH dehydroge     | NM_024407 NM_024407                       |
| 1.82E+00 | 8.67E-01  | NADH dehydroge     | NADH dehydroge     | NM_024407 NM_024407                       |
| 1.82E+00 | 8.67E-01  | NADH dehydroge     | NADH dehydroge     | NM_024407 NM_024407                       |
| 2.93E+02 | 8.19E+00  | solute carrier fan | hypothetical pro   | NM_001080431 NM_001080431                 |
| 3.26E-03 | -8.26E+00 | angiopoietin 1     | R-spondin 2 hom    | NM_001146 NM_001146                       |
| 1.53E+00 | 6.17E-01  | BTG3 associated    | zinc finger protei | NM_017869,NM_017869,NM_079837             |
| 1.53E+00 | 6.17E-01  | BTG3 associated    | zinc finger protei | NM_017869,NM_017869,NM_079837             |
| 3.23E+02 | 8.33E+00  | NK2 homeobox $\xi$ | paired box 9       | NM_014360 NM_014360                       |
| 2.78E+02 | 8.12E+00  | mucin 5B, oligon   | mucin 5B, oligon   | NM_002458 NM_002458                       |
| 2.78E+02 | 8.12E+00  | mucin 5B, oligon   | mucin 5B, oligon   | NM_002458 NM_002458                       |
| 1.24E+00 | 3.08E-01  | regulatory factor  | relaxin 3          | NM_002918 NM_002918                       |
| 1.24E+00 | 3.08E-01  | regulatory factor  | relaxin 3          | NM_002918 NM_002918                       |
| 2.72E+02 | 8.09E+00  | peroxisomal biog   | phospholipase C,   | NM_002617,NM_002617,NM_153818             |
| 2.61E+02 | 8.03E+00  | ATPase, aminopl    | ATPase, aminopl    | NM_138813 NM_138813                       |
| 2.61E+02 | 8.03E+00  | ATPase, aminopl    | ATPase, aminopl    | NM_138813 NM_138813                       |
| 1.88E+00 | 9.11E-01  | ubiquitin-conjug   | ubiquitin-conjug   | NM_014501 NM_014501                       |
| 2.65E+02 | 8.05E+00  | zinc finger protei | zinc finger protei | NM_152493 NM_152493                       |
| 3.64E-03 | -8.10E+00 | natriuretic peptic | natriuretic peptic | NM_006172 NM_006172                       |
| 3.39E+02 | 8.40E+00  | sialic acid bindi  | sialic acid bindi  | NM_003830 NM_003830                       |
| 3.39E+02 | 8.40E+00  | sialic acid bindi  | sialic acid bindi  | NM_003830 NM_003830                       |
| 2.94E+02 | 8.20E+00  | caspase 8 associ   | gap junction proi  | NM_001137668, NM_001137668,NM_001137667,N |
| 1.18E+00 | 2.37E-01  | immunoglobulin     | immunoglobulin     | NM_201526 NM_201526                       |
| 4.61E+02 | 8.85E+00  | AT rich interactiv | AT rich interactiv | NM_005224 NM_005224                       |
| 2.50E+02 | 7.96E+00  | 5-hydroxytryptar   | interleukin-1 rec  | NM_000863 NM_000863                       |
| 2.81E+02 | 8.13E+00  | hect domain and    | makorin ring fing  | NR_002824 NR_002824                       |
| 2.81E+02 | 8.13E+00  | hect domain and    | makorin ring fing  | NR_002824 NR_002824                       |
| 2.64E+02 | 8.05E+00  | AT rich interactiv | AT rich interactiv | NM_005224 NM_005224                       |
| 3.78E+02 | 8.56E+00  | iroquois homeob    | iroquois homeob    | NM_016358 NM_016358                       |
| 3.78E+02 | 8.56E+00  | iroquois homeob    | iroquois homeob    | NM_016358 NM_016358                       |
| 3.22E+02 | 8.33E+00  | regulatory factor  | regulatory factor  | NM_000635,NM_000635,NM_134433             |
| 2.94E+02 | 8.20E+00  | 1-acylglycerol-3-  | family with sequ   | NM_001012727, NM_001012727,NM_006412      |
| 2.94E+02 | 8.20E+00  | 1-acylglycerol-3-  | family with sequ   | NM_001012727, NM_001012727,NM_006412      |
| 2.91E+02 | 8.18E+00  | prolactin releasir | prolactin releasir | NM_015893 NM_015893                       |
| 2.91E+02 | 8.18E+00  | prolactin releasir | prolactin releasir | NM_015893 NM_015893                       |

|          |           |                                       |               |                             |
|----------|-----------|---------------------------------------|---------------|-----------------------------|
| 3.28E+02 | 8.36E+00  | solute carrier fan solute carrier fan | NM_001003841  | NM_001003841                |
| 3.25E+02 | 8.34E+00  | scavenger recept scavenger recept     | NM_005505,NM  | NM_005505,NM_001082959      |
| 3.82E-03 | -8.03E+00 | G protein-couple G protein-couple     | NM_015234,NM  | NM_015234,NM_001098518      |
| 3.06E+02 | 8.26E+00  | fascin homolog 1 fascin homolog 1     | NM_003088     | NM_003088                   |
| 3.06E+02 | 8.26E+00  | fascin homolog 1 fascin homolog 1     | NM_003088     | NM_003088                   |
| 2.90E+02 | 8.18E+00  | forkhead box K1 forkhead box K1       | NM_001037165  | NM_001037165                |
| 2.90E+02 | 8.18E+00  | forkhead box K1 forkhead box K1       | NM_001037165  | NM_001037165                |
| 3.06E+02 | 8.26E+00  | plexin B2 plexin B2                   | NM_012401     | NM_012401                   |
| 1.10E+00 | 1.41E-01  | potassium voltag potassium voltag     | NM_030779,NM  | NM_030779,NM_173092         |
| 1.10E+00 | 1.41E-01  | potassium voltag potassium voltag     | NM_030779,NM  | NM_030779,NM_173092         |
| 3.53E+02 | 8.46E+00  | phosphodiestera phosphodiestera       | NM_001145292  | NM_001145292                |
| 3.53E+02 | 8.46E+00  | phosphodiestera phosphodiestera       | NM_001145292  | NM_001145292                |
| 3.48E+02 | 8.44E+00  | adenosine mono adenosine mono         | NM_004037     | NM_004037                   |
| 3.48E+02 | 8.44E+00  | adenosine mono adenosine mono         | NM_004037     | NM_004037                   |
| 3.25E+02 | 8.34E+00  | G protein-couple zinc finger, AN1-i   | NM_001098201  | NM_001098201                |
| 3.05E+02 | 8.25E+00  | v-ski sarcoma vir v-ski sarcoma vir   | NM_003036     | NM_003036                   |
| 3.05E+02 | 8.25E+00  | v-ski sarcoma vir v-ski sarcoma vir   | NM_003036     | NM_003036                   |
| 1.60E+00 | 6.80E-01  | tet oncogene fan boIA homolog 3       | NM_144993     | NM_144993                   |
| 8.52E-01 | -2.31E-01 | ubiquitin specific 5-hydroxytryptar   | NM_020886     | NM_020886                   |
| 3.12E+02 | 8.29E+00  | family with sequi family with sequi   | NM_015381     | NM_015381                   |
| 3.43E+02 | 8.42E+00  | paralemmin paralemmin                 | NM_001040134, | NM_001040134,NM_002579      |
| 4.23E+02 | 8.72E+00  | mucin 5AC, oligo mucin 5AC, oligo     | NM_017511     | NM_017511                   |
| 8.37E-01 | -2.57E-01 | LIM and senesce LIM and senesce       | NM_033514,NR  | NM_033514,NR_027144,NR_0271 |
| 4.46E+02 | 8.80E+00  | polycystic kidney polycystic kidney   | NM_000296,NM  | NM_000296,NM_001009944      |
| 4.46E+02 | 8.80E+00  | polycystic kidney polycystic kidney   | NM_000296,NM  | NM_000296,NM_001009944      |
| 3.04E+02 | 8.25E+00  | procollagen-lysin procollagen-lysin   | NM_001084     | NM_001084                   |
| 3.39E+02 | 8.41E+00  | laminin, beta 3 laminin, beta 3       | NM_001017402, | NM_001017402,NM_001127641,N |
| 3.41E+02 | 8.41E+00  | golgin A8 family, golgin A8 family,   | NM_001023567, | NM_001023567,NR_027410      |
| 8.88E-01 | -1.71E-01 | RAS-like, family 1 adaptor-related    | NM_006477,NM  | NM_006477,NM_001007279      |
| 8.88E-01 | -1.71E-01 | RAS-like, family 1 adaptor-related    | NM_006477,NM  | NM_006477,NM_001007279      |
| 3.49E+02 | 8.45E+00  | HEAT repeat con scleraxis homolo      | NM_032450,NM  | NM_032450,NM_001099281,NM_  |
| 3.49E+02 | 8.45E+00  | HEAT repeat con scleraxis homolo      | NM_032450,NM  | NM_032450,NM_001099281,NM_  |
| 2.99E-03 | -8.39E+00 | cyclin Y gap junction prot            | NM_145012     | NM_145012                   |
| 2.99E-03 | -8.39E+00 | cyclin Y gap junction prot            | NM_145012     | NM_145012                   |
| 2.99E-03 | -8.39E+00 | gap junction prot gap junction prot   | NM_153368     | NM_153368                   |
| 1.60E+00 | 6.76E-01  | chromosome 3 o caveolin 3             | NM_015931     | NM_015931                   |
| 1.60E+00 | 6.76E-01  | caveolin 3 caveolin 3                 | NM_001234,NM  | NM_001234,NM_033337         |
| 3.21E+02 | 8.33E+00  | transmembrane KIAA0125                | NM_025268     | NM_025268                   |
| 3.21E+02 | 8.33E+00  | transmembrane KIAA0125                | NM_025268     | NM_025268                   |
| 1.66E+00 | 7.29E-01  | plexin B2 plexin B2                   | NM_012401     | NM_012401                   |
| 2.59E+02 | 8.02E+00  | telomerase rever telomerase rever     | NM_198253,NM  | NM_198253,NM_198255         |
| 3.06E+02 | 8.26E+00  | apoptosis-associi apoptosis-associi   | NM_001080395  | NM_001080395                |
| 2.61E+02 | 8.03E+00  | phosphatidylinos phosphatidylinos     | NM_018390     | NM_018390                   |
| 2.61E+02 | 8.03E+00  | phosphatidylinos phosphatidylinos     | NM_018390     | NM_018390                   |
| 1.80E+00 | 8.50E-01  | v-src sarcoma (Src v-src sarcoma (Src | NM_198291     | NM_198291                   |
| 1.80E+00 | 8.50E-01  | v-src sarcoma (Src v-src sarcoma (Src | NM_198291     | NM_198291                   |
| 1.90E+00 | 9.23E-01  | zinc finger protei zinc finger protei | NM_001007248  | NM_001007248                |
| 1.90E+00 | 9.23E-01  | zinc finger protei zinc finger protei | NM_001007248  | NM_001007248                |
| 4.71E-03 | -7.73E+00 | MFNG O-fucosyl caspase recruitm       | NM_002405     | NM_002405                   |
| 3.83E+02 | 8.58E+00  | hexaribonucleoti hexaribonucleoti     | NM_001082575  | NM_001082575                |
| 2.89E+02 | 8.17E+00  | G protein-couple G protein-couple     | NM_001004106, | NM_001004106,NM_002082,NM_  |
| 2.89E+02 | 8.17E+00  | G protein-couple G protein-couple     | NM_001004106, | NM_001004106,NM_002082,NM_  |
| 2.39E+02 | 7.90E+00  | Rho GDP dissoci Rho GDP dissoci       | NM_001176     | NM_001176                   |
| 1.33E+00 | 4.11E-01  | family with sequi family with sequi   | NM_031453     | NM_031453                   |
| 1.33E+00 | 4.11E-01  | family with sequi family with sequi   | NM_031453     | NM_031453                   |
| 1.33E+00 | 4.11E-01  | family with sequi cerebral dopamii    | NM_031453     | NM_031453                   |
| 3.22E+02 | 8.33E+00  | RAB11B, membe RAB11B, membe           | NM_004218     | NM_004218                   |
| 3.22E+02 | 8.33E+00  | RAB11B, membe RAB11B, membe           | NM_004218     | NM_004218                   |



|          |           |                    |                     |               |                            |
|----------|-----------|--------------------|---------------------|---------------|----------------------------|
| 3.14E+02 | 8.29E+00  | vitrin             | vitrin              | NM_053276     | NM_053276                  |
| 3.14E+02 | 8.29E+00  | vitrin             | vitrin              | NM_053276     | NM_053276                  |
| 3.50E+02 | 8.45E+00  | PR domain conta    | PR domain conta     | NM_199454,NM  | NM_199454,NM_022114        |
| 3.80E+02 | 8.57E+00  | myelin associate   | myelin associate    | NM_080600,NM  | NM_080600,NM_002361        |
| 3.80E+02 | 8.57E+00  | myelin associate   | myelin associate    | NM_080600,NM  | NM_080600,NM_002361        |
| 3.80E+02 | 8.57E+00  | myelin associate   | myelin associate    | NM_080600,NM  | NM_080600,NM_002361        |
| 4.05E+02 | 8.66E+00  | ---                | ---                 | NR_024569     | NR_024569                  |
| 4.05E+02 | 8.66E+00  | ---                | C-terminal bindir   | NR_024569     | NR_024569                  |
| 3.46E+02 | 8.43E+00  | pentraxin 4, long  | pentraxin 4, long   | NM_001013658  | NM_001013658               |
| 1.86E+00 | 8.95E-01  | zinc finger protei | zinc finger protei  | NM_015069     | NM_015069                  |
| 3.26E+02 | 8.35E+00  | activin A recepto  | activin A recepto   | NM_001077401  | NM_001077401               |
| 3.26E+02 | 8.35E+00  | activin A recepto  | activin A recepto   | NM_001077401  | NM_001077401               |
| 2.65E+02 | 8.05E+00  | interferon regula  | similar to hCG16    | NM_002163     | NM_002163                  |
| 3.03E+02 | 8.24E+00  | UDP-N-acetyl-alc   | myeloid/lymphoi     | NM_022087     | NM_022087                  |
| 3.33E+02 | 8.38E+00  | dynein, axonema    | dynein, axonema     | NM_020877     | NM_020877                  |
| 3.33E+02 | 8.38E+00  | dynein, axonema    | dynein, axonema     | NM_020877     | NM_020877                  |
| 3.33E+02 | 8.38E+00  | dynein, axonema    | dynein, axonema     | NM_020877     | NM_020877                  |
| 3.28E+02 | 8.36E+00  | sorting nexin 8    | sorting nexin 8     | NM_013321     | NM_013321                  |
| 3.59E+02 | 8.49E+00  | tumor necrosis f   | chromosome 1 o      | NM_003820     | NM_003820                  |
| 3.38E+02 | 8.40E+00  | transcription fact | transcription fact  | NM_001042425, | NM_001042425,NM_003220,NM_ |
| 1.45E+00 | 5.33E-01  | WD repeat doma     | F-box and leucini   | NM_032259     | NM_032259                  |
| 1.45E+00 | 5.33E-01  | WD repeat doma     | F-box and leucini   | NM_032259     | NM_032259                  |
| 3.67E-03 | -8.09E+00 | zinc finger protei | zinc finger protei  | NR_003952     | NR_003952                  |
| 3.26E+02 | 8.35E+00  | adenylosuccinate   | adenylosuccinate    | NM_152328     | NM_152328                  |
| 3.22E-03 | -8.28E+00 | nephronophthisi    | potassium volta     | NM_015102     | NM_015102                  |
| 1.39E+00 | 4.74E-01  | obscurin, cytoske  | obscurin, cytoske   | NM_052843,NM  | NM_052843,NM_001098623     |
| 2.49E+02 | 7.96E+00  | transducin (beta)  | transducin (beta)   | NM_006453     | NM_006453                  |
| 1.51E+00 | 5.94E-01  | protamine 2        | protamine 2         | NM_002762     | NM_002762                  |
| 2.56E+02 | 8.00E+00  | polycystic kidney  | polycystic kidney   | NM_000296,NM  | NM_000296,NM_001009944     |
| 2.56E+02 | 8.00E+00  | polycystic kidney  | polycystic kidney   | NM_000296,NM  | NM_000296,NM_001009944     |
| 4.47E+02 | 8.80E+00  | keratin associate  | keratin associate   | NM_033191     | NM_033191                  |
| 1.88E+00 | 9.09E-01  | hypothetical LOC   | hypothetical LOC    | NR_024394     | NR_024394                  |
| 3.39E+02 | 8.40E+00  | lymphocyte-spec    | lymphocyte-spec     | NM_002339     | NM_002339                  |
| 3.53E-03 | -8.15E+00 | leucine rich repe  | leucine rich repe   | NM_032270     | NM_032270                  |
| 3.53E-03 | -8.15E+00 | leucine rich repe  | leucine rich repe   | NM_032270     | NM_032270                  |
| 2.88E+02 | 8.17E+00  | SPANX family, m    | SPANX family, m     | NM_145665,NM  | NM_145665,NM_032417        |
| 4.30E-03 | -7.86E+00 | damage-specific    | damage-specific     | NM_001923     | NM_001923                  |
| 1.18E+00 | 2.38E-01  | tubulin, beta 3    | tubulin, beta 3     | NM_006086     | NM_006086                  |
| 1.18E+00 | 2.38E-01  | tubulin, beta 3    | tubulin, beta 3     | NM_006086     | NM_006086                  |
| 1.18E+00 | 2.38E-01  | tubulin, beta 3    | tubulin, beta 3     | NM_006086     | NM_006086                  |
| 4.49E-03 | -7.80E+00 | RIMS binding prc   | hypermethylatec     | NM_001128635  | NM_001128635               |
| 1.18E+00 | 2.36E-01  | GTF2I repeat dor   | NOP2/Sun doma       | NR_002164     | NR_002164                  |
| 1.18E+00 | 2.36E-01  | GTF2I repeat dor   | NOP2/Sun doma       | NR_002164     | NR_002164                  |
| 1.18E+00 | 2.36E-01  | GTF2I repeat dor   | NOP2/Sun doma       | NR_002164     | NR_002164                  |
| 3.11E+02 | 8.28E+00  | egl nine homolog   | egl nine homolog    | NM_053046     | NM_053046                  |
| 1.43E+00 | 5.17E-01  | zinc finger protei | zinc finger protei  | NM_153813     | NM_153813                  |
| 1.43E+00 | 5.17E-01  | zinc finger protei | zinc finger protei  | NM_153813     | NM_153813                  |
| 2.33E+00 | 1.22E+00  | kinase non-catal   | undifferentiated    | NM_152643     | NM_152643                  |
| 1.23E+00 | 3.02E-01  | macrophage stir    | ciliary rootlet coi | NR_002729     | NR_002729                  |
| 1.23E+00 | 3.02E-01  | macrophage stir    | ciliary rootlet coi | NR_002729     | NR_002729                  |
| 1.23E+00 | 3.02E-01  | macrophage stir    | ciliary rootlet coi | NR_002729     | NR_002729                  |
| 2.68E+02 | 8.07E+00  | keratin 8          | keratin 8           | NM_002273     | NM_002273                  |
| 3.88E+02 | 8.60E+00  | histone deacetyl   | histone deacetyl    | NM_006037     | NM_006037                  |
| 3.32E+02 | 8.38E+00  | solute carrier fan | solute carrier fan  | NM_033102     | NM_033102                  |
| 3.32E+02 | 8.38E+00  | solute carrier fan | solute carrier fan  | NM_033102     | NM_033102                  |
| 3.38E+02 | 8.40E+00  | RGM domain fan     | RGM domain fan      | NM_020211     | NM_020211                  |
| 3.38E+02 | 8.40E+00  | RGM domain fan     | RGM domain fan      | NM_020211     | NM_020211                  |
| 3.22E+02 | 8.33E+00  | furin (paired basi | furin (paired basi  | NM_002569     | NM_002569                  |

|          |           |                                                                      |                            |
|----------|-----------|----------------------------------------------------------------------|----------------------------|
| 3.22E+02 | 8.33E+00  | furin (paired basi furin (paired basi NM_002569                      | NM_002569                  |
| 2.94E+02 | 8.20E+00  | piwi-like 2 (Drosop piwi-like 2 (Drosop NM_018068                    | NM_018068                  |
| 2.94E+02 | 8.20E+00  | piwi-like 2 (Drosop piwi-like 2 (Drosop NM_001135721                 | NM_001135721               |
| 2.97E+02 | 8.22E+00  | solute carrier fan solute carrier fan NM_004174                      | NM_004174                  |
| 3.39E+02 | 8.40E+00  | GDNF family rece GDNF family rece NM_001495                          | NM_001495                  |
| 3.39E+02 | 8.40E+00  | GDNF family rece GDNF family rece NM_001495                          | NM_001495                  |
| 3.39E+02 | 8.40E+00  | GDNF family rece GDNF family rece NM_001495                          | NM_001495                  |
| 1.64E+00 | 7.18E-01  | N-deacetylase/N translocation ass NM_022569                          | NM_022569                  |
| 1.64E+00 | 7.18E-01  | N-deacetylase/N translocation ass NM_022569                          | NM_022569                  |
| 2.56E+02 | 8.00E+00  | TBC1 domain fan TBC1 domain fan NM_019020                            | NM_019020                  |
| 1.70E+00 | 7.66E-01  | pericentrin pericentrin NM_006031                                    | NM_006031                  |
| 1.70E+00 | 7.66E-01  | pericentrin pericentrin NM_006031                                    | NM_006031                  |
| 3.56E+02 | 8.48E+00  | non-metastatic c non-metastatic c NM_005009                          | NM_005009                  |
| 3.56E+02 | 8.48E+00  | non-metastatic c non-metastatic c NM_005009                          | NM_005009                  |
| 3.56E+02 | 8.48E+00  | non-metastatic c non-metastatic c NM_005009                          | NM_005009                  |
| 2.46E+02 | 7.94E+00  | MAP kinase inter MAP kinase inter NM_017572,NM_017572,NM_199054      | NM_017572,NM_199054        |
| 2.46E+02 | 7.94E+00  | MAP kinase inter MAP kinase inter NM_017572,NM_017572,NM_199054      | NM_017572,NM_199054        |
| 1.20E+00 | 2.67E-01  | GRB10 interactin GRB10 interactin NM_022574                          | NM_022574                  |
| 1.20E+00 | 2.67E-01  | GRB10 interactin GRB10 interactin NM_022574                          | NM_022574                  |
| 2.54E+02 | 7.99E+00  | protamine 1 chromosome 16 NM_002761                                  | NM_002761                  |
| 3.51E-03 | -8.15E+00 | tetraspanin 3 NKFB3 kinase fam NM_005724,NM_005724,NM_198902         | NM_005724,NM_198902        |
| 3.51E-03 | -8.15E+00 | tetraspanin 3 NKFB3 kinase fam NM_005724,NM_005724,NM_198902         | NM_005724,NM_198902        |
| 1.99E+00 | 9.90E-01  | SIX homeobox 2 S1 RNA binding d NM_016932                            | NM_016932                  |
| 1.99E+00 | 9.90E-01  | SIX homeobox 2 S1 RNA binding d NM_016932                            | NM_016932                  |
| 4.41E+02 | 8.79E+00  | mediator comple mediator comple NM_001003891, NM_001003891,NM_015889 | NM_001003891,NM_015889     |
| 2.64E+02 | 8.04E+00  | transmembrane M-phase phosph NM_130785,NM_130785,NM_199254,NM_001    | NM_130785,NM_199254,NM_001 |
| 2.64E+02 | 8.04E+00  | transmembrane M-phase phosph NM_130785,NM_130785,NM_199254,NM_001    | NM_130785,NM_199254,NM_001 |
| 3.80E-03 | -8.04E+00 | tachykinin recept tachykinin recept NM_001057                        | NM_001057                  |
| 1.58E+00 | 6.58E-01  | microtubule-assc microtubule-assc NM_181509                          | NM_181509                  |
| 2.91E+02 | 8.18E+00  | chromosome 20 chromosome 20 NM_080825                                | NM_080825                  |
| 3.26E+02 | 8.35E+00  | PAP associated d PAP associated d NM_006999                          | NM_006999                  |
| 3.26E+02 | 8.35E+00  | PAP associated d PAP associated d NM_006999                          | NM_006999                  |
| 3.09E+02 | 8.27E+00  | iroquois homeob iroquois homeob NM_016358                            | NM_016358                  |
| 3.99E+02 | 8.64E+00  | ArfGAP with dua ArfGAP with dua NM_006869                            | NM_006869                  |
| 1.89E+00 | 9.21E-01  | RAS p21 protein RAS p21 protein NM_007368                            | NM_007368                  |
| 1.89E+00 | 9.21E-01  | RAS p21 protein RAS p21 protein NM_007368                            | NM_007368                  |
| 3.40E+02 | 8.41E+00  | ARP3 actin-relate dipeptidyl-peptic NM_005721                        | NM_005721                  |
| 3.40E+02 | 8.41E+00  | ARP3 actin-relate dipeptidyl-peptic NM_005721                        | NM_005721                  |
| 3.40E+02 | 8.41E+00  | ARP3 actin-relate dipeptidyl-peptic NM_005721                        | NM_005721                  |
| 1.74E+00 | 8.00E-01  | SET binding factc SET binding factc NM_002972                        | NM_002972                  |
| 2.80E+02 | 8.13E+00  | iroquois homeob iroquois homeob NM_016358                            | NM_016358                  |
| 2.80E+02 | 8.13E+00  | iroquois homeob iroquois homeob NM_016358                            | NM_016358                  |
| 2.44E+02 | 7.93E+00  | unc-5 homolog A unc-5 homolog A NM_133369                            | NM_133369                  |
| 3.36E+02 | 8.39E+00  | sidekick homolog sidekick homolog NM_152744                          | NM_152744                  |
| 3.36E+02 | 8.39E+00  | sidekick homolog sidekick homolog NM_152744                          | NM_152744                  |
| 3.36E+02 | 8.39E+00  | sidekick homolog sidekick homolog NM_152744                          | NM_152744                  |
| 4.23E-03 | -7.89E+00 | SRY (sex determi SRY (sex determi NM_031439                          | NM_031439                  |
| 3.27E+02 | 8.35E+00  | histone deacetyl; histone deacetyl; NM_006037                        | NM_006037                  |
| 3.51E+02 | 8.46E+00  | ankyrin repeat d; lipase, member I NR_027270                         | NR_027270                  |
| 3.51E+02 | 8.46E+00  | ankyrin repeat d; lipase, member I NR_027270                         | NR_027270                  |
| 4.53E-03 | -7.79E+00 | glycerol kinase 5 5'-3' exoribonucl NM_001039547                     | NM_001039547               |
| 3.49E+02 | 8.45E+00  | N-acetylglucosan N-acetylglucosan NM_032520                          | NM_032520                  |
| 2.61E+02 | 8.03E+00  | GNAS complex lc GNAS complex lc NM_016592                            | NM_016592                  |
| 1.36E+00 | 4.43E-01  | phospholipid scr; Zic family memb; NM_001085420                      | NM_001085420               |
| 3.07E+02 | 8.26E+00  | naked cuticle hor naked cuticle hor NM_033120                        | NM_033120                  |
| 3.07E+02 | 8.26E+00  | naked cuticle hor naked cuticle hor NM_033120                        | NM_033120                  |
| 3.07E+02 | 8.26E+00  | naked cuticle hor naked cuticle hor NM_033120                        | NM_033120                  |
| 3.23E+02 | 8.34E+00  | pleckstrin homol pleckstrin homol NM_198850                          | NM_198850                  |

|          |           |                     |                     |                  |                             |
|----------|-----------|---------------------|---------------------|------------------|-----------------------------|
| 3.23E+02 | 8.34E+00  | pleckstrin homol    | pleckstrin homol    | NM_198850        | NM_198850                   |
| 2.96E+02 | 8.21E+00  | FGFR1 oncogene      | chemokine (C-C      | NM_007045,NM     | NM_007045,NM_194429         |
| 2.96E+02 | 8.21E+00  | FGFR1 oncogene      | chemokine (C-C      | NM_007045,NM     | NM_007045,NM_194429         |
| 1.77E+00 | 8.25E-01  | gamma-glutamyl      | gamma-glutamyl      | NM_178026        | NM_178026                   |
| 1.77E+00 | 8.25E-01  | gamma-glutamyl      | gamma-glutamyl      | NM_178026        | NM_178026                   |
| 3.87E+02 | 8.60E+00  | dynamin 1 pseud     | dynamin 1 pseud     | NR_003260        | NR_003260                   |
| 3.44E+02 | 8.43E+00  | mohawk homeol       | mohawk homeol       | NM_173576        | NM_173576                   |
| 3.44E+02 | 8.43E+00  | mohawk homeol       | mohawk homeol       | NM_173576        | NM_173576                   |
| 2.51E+02 | 7.97E+00  | MCF.2 cell line d   | MCF.2 cell line d   | NM_024979        | NM_024979                   |
| 2.49E+02 | 7.96E+00  | DOT1-like, histor   | DOT1-like, histor   | NM_032482        | NM_032482                   |
| 2.49E+02 | 7.96E+00  | DOT1-like, histor   | DOT1-like, histor   | NM_032482        | NM_032482                   |
| 1.79E+00 | 8.36E-01  | programmed cell     | mitochondrial ri    | NR_003713        | NR_003713                   |
| 2.92E+02 | 8.19E+00  | solute carrier fan  | ectonucleoside t    | NM_031212        | NM_031212                   |
| 3.35E+02 | 8.39E+00  | amyloid beta (A4    | amyloid beta (A4    | NM_001130414, NM | NM_001130414,NM_005503      |
| 3.35E+02 | 8.39E+00  | amyloid beta (A4    | amyloid beta (A4    | NM_001130414, NM | NM_001130414,NM_005503      |
| 3.78E+02 | 8.56E+00  | mucin 6, oligome    | mucin 6, oligome    | NM_005961        | NM_005961                   |
| 3.00E+02 | 8.23E+00  | coiled-coil doma    | proline rich 24     | NM_015603        | NM_015603                   |
| 3.35E+02 | 8.39E+00  | PHD finger prote    | tubulin, alpha 3c   | NR_002801        | NR_002801                   |
| 3.01E+02 | 8.23E+00  | coiled-coil doma    | beta-1,4-N-acety    | NM_032358,NM     | NM_032358,NM_001130146      |
| 3.38E+02 | 8.40E+00  | phytanoyl-CoA d     | phytanoyl-CoA d     | NM_001100876, NM | NM_001100876,NM_174933      |
| 3.38E+02 | 8.40E+00  | phytanoyl-CoA d     | phytanoyl-CoA d     | NM_001100876, NM | NM_001100876,NM_174933      |
| 3.00E+02 | 8.23E+00  | von Willebrand f    | von Willebrand f    | NM_000552        | NM_000552                   |
| 4.02E+02 | 8.65E+00  | similar to cDNA s   | chromosome 21       | NM_001013729     | NM_001013729                |
| 3.16E+02 | 8.30E+00  | psoriasis suscept   | psoriasis suscept   | NM_014069        | NM_014069                   |
| 2.56E+02 | 8.00E+00  | nicalin homolog     | nicalin homolog     | NM_020170        | NM_020170                   |
| 2.56E+02 | 8.00E+00  | nicalin homolog     | nicalin homolog     | NM_020170        | NM_020170                   |
| 2.83E+02 | 8.15E+00  | solute carrier fan  | solute carrier fan  | NM_152346        | NM_152346                   |
| 2.83E+02 | 8.15E+00  | solute carrier fan  | solute carrier fan  | NM_152346        | NM_152346                   |
| 2.56E+02 | 8.00E+00  | troponin T type     | troponin T type     | NM_001042781, NM | NM_001042781,NM_001042782,N |
| 4.28E+02 | 8.74E+00  | melanoma antig      | melanoma antig      | NM_001098800     | NM_001098800                |
| 3.28E+02 | 8.36E+00  | phosphatidylseri    | phosphatidylseri    | NM_030783        | NM_030783                   |
| 3.28E+02 | 8.36E+00  | phosphatidylseri    | phosphatidylseri    | NM_030783        | NM_030783                   |
| 4.06E+02 | 8.67E+00  | zinc finger protei  | zinc finger protei  | NM_001130031, NM | NM_001130031,NM_001130032,N |
| 3.19E+02 | 8.32E+00  | pentraxin 4, long   | TEL2, telomere n    | NM_001013658     | NM_001013658                |
| 2.94E+02 | 8.20E+00  | archaelysin famil   | archaelysin famil   | NM_133463        | NM_133463                   |
| 3.19E+02 | 8.32E+00  | family with sequ    | family with sequ    | NM_178468        | NM_178468                   |
| 2.48E+02 | 7.95E+00  | Janus kinase 2      | Janus kinase 2      | NM_004972        | NM_004972                   |
| 2.48E+02 | 7.95E+00  | Janus kinase 2      | Janus kinase 2      | NM_004972        | NM_004972                   |
| 8.73E-01 | -1.97E-01 | arachidonate 12-    | arachidonate 12-    | NR_002710        | NR_002710                   |
| 1.23E+00 | 2.97E-01  | chromosome 21       | chromosome 21       | NM_058190        | NM_058190                   |
| 1.23E+00 | 2.97E-01  | chromosome 21       | chromosome 21       | NM_058190        | NM_058190                   |
| 3.72E-03 | -8.07E+00 | TAF12 RNA polyr     | RNA, U11 small r    | NM_005644,NM     | NM_005644,NM_001135218      |
| 3.01E+02 | 8.23E+00  | REX1, RNA exon      | REX1, RNA exon      | NM_020695        | NM_020695                   |
| 2.28E+00 | 1.19E+00  | solute carrier fan  | solute carrier fan  | NM_003562        | NM_003562                   |
| 1.34E+00 | 4.21E-01  | Ras association (   | Ras association (   | NM_170714,NM     | NM_170714,NM_007182,NM_17C  |
| 3.87E-03 | -8.01E+00 | brain expressed,    | nuclear RNA exp     | NM_001012978, NM | NM_001012978,NM_001159560   |
| 3.87E-03 | -8.01E+00 | nuclear RNA exp     | nuclear RNA exp     | NM_001099686, NM | NM_001099686,NM_017809      |
| 3.43E-03 | -8.19E+00 | cystatin 11         | cystatin 11         | NM_130794,NM     | NM_130794,NM_080830         |
| 3.43E-03 | -8.19E+00 | cystatin 11         | cystatin 11         | NM_130794,NM     | NM_130794,NM_080830         |
| 2.69E+02 | 8.07E+00  | WNT inhibitory f    | LEM domain con      | NM_007191        | NM_007191                   |
| 2.69E+02 | 8.07E+00  | WNT inhibitory f    | LEM domain con      | NM_007191        | NM_007191                   |
| 1.48E+00 | 5.61E-01  | SAM pointed dor     | chromosome 6 o      | NM_012391        | NM_012391                   |
| 1.48E+00 | 5.61E-01  | SAM pointed dor     | chromosome 6 o      | NM_012391        | NM_012391                   |
| 3.46E+02 | 8.43E+00  | hexamethylene bi    | hexamethylene bi    | NM_144608        | NM_144608                   |
| 3.46E+02 | 8.43E+00  | hexamethylene bi    | hexamethylene bi    | NM_144608        | NM_144608                   |
| 3.14E+02 | 8.29E+00  | chromosome 9 o      | chromosome 9 o      | NM_032823        | NM_032823                   |
| 3.14E+02 | 8.29E+00  | chromosome 9 o      | chromosome 9 o      | NM_032823        | NM_032823                   |
| 2.90E+02 | 8.18E+00  | testis-specific tra | testis specific prc | NR_003593, NR_   | NR_003593, NR_001540        |

3.87E-03

-8.01E+00

nuclear RNA exp nuclear RNA exp NM\_017809,NM\_017809,NM\_022053



!847  
!847

'966

'966

!850,NM\_130855  
!850,NM\_130855

√M\_001039178,NM\_004889

√M\_198991

√M\_198991



\_002640  
\_002640

\_001039348

\_001039348

.142531,NM\_001142532,NM\_001142533,NM\_001142534

.142531,NM\_001142532,NM\_001142533,NM\_001142534

!847

NM\_001005224

'536  
'536

i361

VM\_000691

NM\_001145962,NM\_005072,NM\_001145961

i853,NM\_206854

i853,NM\_206854

i853,NM\_206854

1325

1325

227

\_001013836

171,NM\_033170,NM\_006057

NM\_001126241

NM\_001005277  
NM\_001005277

i721,NM\_175722  
i721,NM\_175722  
i721,NM\_175722

.016817

.083914

\_001079803

√M\_001033571,NM\_001033572,NM\_001033574,NM\_016627

\_001025073

√M\_001005224

45

45



954,NM\_206955,NM\_206956

NM\_006505,NM\_001135770

179



.008410

.008410

1966,NM\_003790,NM\_148965

1418

1359

VM\_001128845,NM\_001128847  
VM\_001128845,NM\_001128847

.536

!328,NM\_022781,NM\_194329

!328,NM\_022781,NM\_194329

\_001142291,NM\_001142290

!505,NM\_144506

!418

!502  
!502

NM\_001123385,NM\_017745

VM\_001915

\_001127593,NM\_001127595,NM\_001127596

VM\_020727

\_032495,NM\_139211,NM\_001145459



!331,NM\_007331

!456

!108,NM\_004518  
\_001013836  
\_001013836

√M\_032350  
√M\_032350

\_001042365,NM\_001042396,NM\_001042395,NM\_001042397,NM\_001042363,NM\_001042387,NM\_001042362,NM\_001042390,NM\_001

\_001110219,NM\_001110220  
\_001110219,NM\_001110220

\_001002019



.001014431  
.001128596  
.001128596

.141968

√M\_001145849,NM\_001145850,NM\_001145852,NM\_001145851,NM\_006017  
√M\_001145849,NM\_001145850,NM\_001145852,NM\_001145851,NM\_006017





003409

1732

172

172



.379,NM\_201380,NM\_201381,NM\_201382,NM\_201383,NM\_201384



!847  
!847

VM\_020478,NM\_020480

\_001077186  
\_001077186

072,NM\_017692,NM\_175071

NM\_001040161,NM\_001040162,NM\_032366

969

704  
704

360

NM\_001915

1393,NM\_130392,NM\_001040712  
1393,NM\_130392,NM\_001040712

!847  
!847

NM\_001014835,NM\_001014831,NM\_005884

\_001013836

!507

\_001114382

NM\_001009941  
!974

.127612

.269





.991,NM\_175847  
.991,NM\_175847

1361,NM\_199360,NM\_199359,NM\_003288

VM\_001113207,NM\_001126312

1325

1325

1325

\_177924

VM\_001123385,NM\_017745

VM\_001123385,NM\_017745

56,NM\_014836

\_012119

\_138610,NM\_138609

3406  
3406

\_001102454  
\_001102454  
\_001102454

1234  
1234

1957

√M\_033503,NM\_001003940  
√M\_033503,NM\_001003940

.039933

!150  
!150

√M\_001123385,NM\_017745  
√M\_025078  
√M\_025078



174  
174

\_001079881,NM\_001079882

431  
431

NM\_001128219,NM\_014667

\_001042681

!850,NM\_130855  
!850,NM\_130855

!M\_004485

\_005943,NM\_005942

\_130766  
\_130766

.135217

!847

\_001013836

\_001013836

VM\_001142807

.379,NM\_201380,NM\_201381,NM\_201382,NM\_201383,NM\_201384  
NM\_001123385,NM\_017745

053  
053

\_001040118  
\_001040118

\_001130060

i853,NM\_206854  
i853,NM\_206854

NM\_017765

018300,NM\_001105553,NM\_001105551,NM\_001105554,NM\_001105549,NM\_001105552  
.379,NM\_201380,NM\_201381,NM\_201382,NM\_201383,NM\_201384  
.379,NM\_201380,NM\_201381,NM\_201382,NM\_201383,NM\_201384  
.379,NM\_201380,NM\_201381,NM\_201382,NM\_201383,NM\_201384

\_001040118

\_133633

√M\_000264,NM\_001083605,NM\_001083604,NM\_001083606,NM\_001083607  
√M\_000264,NM\_001083605,NM\_001083604,NM\_001083606,NM\_001083607

)244,NM\_130799,NM\_130802,NM\_130804,NM\_130803  
)244,NM\_130799,NM\_130802,NM\_130804,NM\_130803  
)244,NM\_130799,NM\_130802,NM\_130804,NM\_130803



.379,NM\_201380,NM\_201381,NM\_201382,NM\_201383,NM\_201384

!509  
!509

\_001008216

√M\_001112,NM\_015834,NM\_015833  
√M\_001112,NM\_015834,NM\_015833

\_001142460

\_001128616  
\_001128616

\_001128596

418,NM\_020550

\_001142295,NM\_001142294

NM\_001042780,NM\_006757

.009955

NM\_001114620,NM\_001114619,NM\_002406  
NM\_001114620,NM\_001114619,NM\_002406

3727,NM\_080704

!847  
!847

\_001111032,NM\_001111033

\_001032290,NM\_001005290  
\_001032290,NM\_001005290  
12,NR\_026838,NR\_026841

902  
.130865

174  
174  
174

NM\_032350





\_001145662

\_001013836  
\_001013836  
\_001013836  
\_000920



NM\_001126241

i162  
i162

.008410

.379,NM\_201380,NM\_201381,NM\_201382,NM\_201383,NM\_201384  
.379,NM\_201380,NM\_201381,NM\_201382,NM\_201383,NM\_201384  
.379,NM\_201380,NM\_201381,NM\_201382,NM\_201383,NM\_201384

336  
336

\_001004105  
)1,NR\_024500,NR\_024499  
)1,NR\_024500,NR\_024499

!958,NM\_174955,NM\_174956,NM\_174954,NM\_005173

!847

!847

\_001001431,NM\_001001430

\_024429

√M\_004485  
√M\_004485  
√M\_004485

√140,NM\_172246

√M\_001042780,NM\_006757

\_000115

VM\_025078

951,NM\_013992,NM\_003466

VM\_001042780,NM\_006757

348,NM\_033455

NM\_033503,NM\_001003940  
.161

\_001081560,NM\_001081563



.379,NM\_201380,NM\_201381,NM\_201382,NM\_201383,NM\_201384

384,NM\_203385,NM\_203387,NM\_203386,NM\_203389,NM\_203388

\_001077395

VM\_000228

VM\_001130455,NM\_001130983,NM\_001130985,NM\_001130987,NM\_001130986

VM\_001130455,NM\_001130983,NM\_001130985,NM\_001130987,NM\_001130986

.024845  
.024845

3006  
3006

3399  
3399

.025079

'451,NM\_001144888

'451,NM\_001144888

\_001145369,NM\_001145370,NM\_001145372,NM\_001145371,NR\_026918

\_001145369,NM\_001145370,NM\_001145372,NM\_001145371,NR\_026918

NM\_000487,NM\_001085425,NM\_001085426

'451,NM\_001144888  
'451,NM\_001144888

NM\_198991

.536  
.536

.135659

\_024429

!847

!847

45020

.018054

VM\_001111034,NM\_001611

NM\_002759

NM\_001099282,NM\_005674

√M\_000903

√M\_000487,NM\_001085425,NM\_001085426

√M\_000487,NM\_001085425,NM\_001085426

!847

\_001042397,NM\_001042396,NM\_001042395,NM\_001042364,NM\_001042365,NM\_001042387,NM\_001042361,NM\_001042362,NM\_001

NM\_001137548

NM\_198441,NM\_001130406,NM\_001130407



1732

79,NM\_001146627,NM\_001146590

3727,NM\_080704  
3727,NM\_080704  
3727,NM\_080704  
3727,NM\_080704  
3727,NM\_080704

NM\_001145962,NM\_005072,NM\_001145961

.039933

.640,NM\_016951

;721,NM\_175722

;721,NM\_175722

1325

!847  
!847

\_001013836

!847  
!847

\_001114382  
\_001114382

\_001114382  
\_001114382  
\_001114382

\_001100119

\_001025089,NM\_001025088

\_001002019

!847

\_001013836

√M\_001033571,NM\_001033572,NM\_001033574,NM\_016627  
√M\_001033571,NM\_001033572,NM\_001033574,NM\_016627

!847  
!847

'329  
'329





\_001013836

\_001004105

\_001004105

383,NM\_198385,NM\_198377,NM\_198380,NM\_198388,NM\_198382,NM\_018896,NM\_198386,NM\_198384,NM\_198387,NM\_198379,NM

169,NM\_020182

169,NM\_020182

1360

\_134325

VM\_001042780,NM\_006757

.024845

VM\_032350

\_001040118  
\_001040118

VM\_001097591,NM\_001097595

\_001099639  
\_001099639

√M\_025078  
√M\_025078

\_001136135,NM\_001136137,NM\_001136136

\_001025089,NM\_001025088

\_001142676,NM\_001142677,NM\_001142675

\_001012427

\_001012427

NM\_001145962,NM\_005072,NM\_001145961

1708

.864,NM\_007274



\_001082534

VM\_032350

√M\_032350

\_001032280

\_001013836  
\_001013836

√M\_001915

!847  
!431  
!431  
√M\_001915

√M\_001159546,NM\_006605

\_001013836  
\_001013836

!850,NM\_130855  
!850,NM\_130855

\_001100599  
\_001100599

.136  
.136

I457,NM\_194315  
I457,NM\_194315

NM\_001042780,NM\_006757

NM\_020478,NM\_020480  
NM\_020478,NM\_020480

NM\_004485  
NM\_004485

1384,NM\_015844,NM\_015847

VM\_032350  
VM\_032350

\_001081560,NM\_001081563

\_001130100  
\_001130100

!985,NM\_018262

\_001013836

.736,NM\_001286

!847

015346

015346

015346

!850,NM\_130855

√M\_001915

√M\_001915

√M\_032350



NM\_032350

.536

!481,NM\_183228,NM\_183229,NM\_183230  
!481,NM\_183228,NM\_183229,NM\_183230

\_001114382  
\_001114382  
\_001114382

\_001013836  
\_001013836

VM\_001130455,NM\_001130983,NM\_001130985,NM\_001130987,NM\_001130986

VM\_198441,NM\_001130406,NM\_001130407  
VM\_198441,NM\_001130406,NM\_001130407  
VM\_198441,NM\_001130406,NM\_001130407  
\_001130405,NM\_001130406,NM\_001130407

\_134325

13

.141968  
.141968

\_001127453

\_001142460

18,NM\_004332

18,NM\_004332

1406

NM\_001014835,NM\_001014831,NM\_005884

!507

!847  
!847

VM\_006505,NM\_001135770

\_001079881,NM\_001079882  
\_001079881,NM\_001079882

\_001960,NM\_001130055,NM\_001130056,NM\_001130054,NM\_001130057

.991,NM\_175847  
.991,NM\_175847



150

27389

NM\_001123385,NM\_017745



!088  
!088

!719,NM\_178586

NM\_012115

45

VM\_000228

\_001099280  
\_001099280

\_001004105  
\_001004105

\_001032280

.141968  
.141968

VM\_001042780,NM\_006757

VM\_017656

1712,NM\_170713



















































042358,NM\_001042394,NM\_001042391,NM\_001042392,NM\_001042393,NM\_001042359,NM\_001042360,NM\_001042361,NM\_001042:

























































































































042390,NM\_001042394,NM\_001042391,NM\_001042392,NM\_001042393,NM\_001042358,NM\_001042360,NM\_001042359,NM\_001042:





















I\_198376,NM\_198396





















































































































389,NM\_001042357























































































































389,NM\_001042357
